# Supplementary material for: RNA Microarray Analysis of Macroscopically Normal Articular Cartilage from Knees Undergoing Partial Medial Meniscectomy: Potential Prediction of the Risk for Developing Osteoarthritis
Source: PubMed Central journal article supplement (PMC4865200; doi:10.1371/journal.pone.0155373), 2016-05-12
Supplement: pone.0155373.s001.pdf [file pone.0155373.s001.pdf]

**Supplementary Table 1: Gene transcripts correlated with age\***

| <b>Gene symbol</b>                            | <b>P value</b> | <b>r</b> | <b>Gene symbol</b>                            | <b>P value</b> | <b>r</b> |
|-----------------------------------------------|----------------|----------|-----------------------------------------------|----------------|----------|
| <i>Gene transcripts positively correlated</i> |                |          | <i>Gene transcripts negatively correlated</i> |                |          |
| TSC2                                          | 0.004          | 0.81     | PFKFB2                                        | 0.001          | -0.87    |
| SNAI2                                         | 0.004          | 0.81     | PSMD5-AS1                                     | 0.001          | -0.87    |
| SLC35E1                                       | 0.003          | 0.81     | CD14                                          | 0.001          | -0.84    |
| TBC1D3P1-DHX40P1                              | 0.004          | 0.81     | FCGR2B                                        | 0.002          | -0.82    |
| DCUN1D2-AS2                                   | 0.004          | 0.80     | TAGAP                                         | 0.003          | -0.82    |
| PREX2                                         | 0.005          | 0.80     | OR2M3                                         | 0.002          | -0.82    |
| IFITM2                                        | 0.004          | 0.79     | SLC8A1-AS1                                    | 0.003          | -0.82    |
| DOT1L                                         | 0.004          | 0.79     | DIRC3                                         | 0.003          | -0.81    |
| STXBP4                                        | 0.002          | 0.79     | ATP8B4                                        | 0.003          | -0.81    |
| MOV10                                         | 0.005          | 0.79     | RASSF2                                        | 0.004          | -0.80    |
| CNNM3                                         | 0.006          | 0.78     | MMP24-AS1                                     | 0.000          | -0.80    |
| CDK2                                          | 0.005          | 0.78     | FGD2                                          | 0.005          | -0.79    |
| RAD51-AS1                                     | 0.007          | 0.78     | LINC00489                                     | 0.005          | -0.79    |
| ZNF546                                        | 0.005          | 0.77     | HNF1A-AS1                                     | 0.006          | -0.78    |
| TRIB2                                         | 0.005          | 0.77     | TCEAL3                                        | 0.007          | -0.77    |
| SLC25A37                                      | 0.007          | 0.77     | CYTIP                                         | 0.007          | -0.77    |
| MIR4465                                       | 0.006          | 0.77     | NCF1B                                         | 0.007          | -0.77    |
| SLC39A1                                       | 0.005          | 0.77     | SLC5A8                                        | 0.007          | -0.77    |
| XAB2                                          | 0.007          | 0.76     | RAB11FIP1                                     | 0.007          | -0.77    |
| TAF6L                                         | 0.008          | 0.76     | RNU7-25P                                      | 0.009          | -0.77    |
| GMCL1                                         | 0.006          | 0.75     | POTEE                                         | 0.007          | -0.76    |
| RING1                                         | 0.009          | 0.75     | LINC00891                                     | 0.010          | -0.76    |
| DTWD1                                         | 0.007          | 0.75     | PPEF1-AS1                                     | 0.011          | -0.76    |
| TACSTD2                                       | 0.007          | 0.75     | EFHC2                                         | 0.010          | -0.76    |
| C6orf165                                      | 0.007          | 0.74     | GPBAR1                                        | 0.009          | -0.76    |
| DKAKD                                         | 0.011          | 0.74     | HAVCR2                                        | 0.010          | -0.75    |
| IRF2BP1                                       | 0.010          | 0.74     | GAGE2A                                        | 0.006          | -0.75    |
| FAM215B                                       | 0.009          | 0.74     | FCER1A                                        | 0.009          | -0.75    |
| RPL36                                         | 0.008          | 0.73     | THEG                                          | 0.010          | -0.74    |
| TMUB2                                         | 0.011          | 0.73     | SERPINB13                                     | 0.010          | -0.74    |
| ANGPTL7                                       | 0.009          | 0.73     | C19orf57                                      | 0.006          | -0.74    |
| SYNGAP1                                       | 0.009          | 0.73     | BTNL3                                         | 0.012          | -0.74    |
| C17orf100                                     | 0.010          | 0.73     | PBOV1                                         | 0.011          | -0.74    |
| ADARB1                                        | 0.016          | 0.73     | CEACAM18                                      | 0.013          | -0.74    |
| ANKZF1                                        | 0.004          | 0.73     | BTC                                           | 0.007          | -0.74    |
| MIR4671                                       | 0.015          | 0.73     | HBG2                                          | 0.012          | -0.74    |
| FXYD6                                         | 0.014          | 0.73     | MS4A4E                                        | 0.012          | -0.74    |
| CLIP3                                         | 0.011          | 0.73     | IL2RG                                         | 0.014          | -0.74    |
| USP20                                         | 0.010          | 0.73     | TRBV30                                        | 0.014          | -0.74    |
| GATSL3                                        | 0.016          | 0.73     | HPGDS                                         | 0.008          | -0.74    |
| KIAA0355                                      | 0.012          | 0.73     | NRG1                                          | 0.009          | -0.74    |
| PVRIG                                         | 0.005          | 0.73     | LCE1C                                         | 0.008          | -0.74    |
| FOXO3                                         | 0.016          | 0.72     | IGKV1-37                                      | 0.015          | -0.74    |

|            |       |      |            |       |       |
|------------|-------|------|------------|-------|-------|
| SSBP3      | 0.018 | 0.72 | RNU1-15P   | 0.012 | -0.73 |
| POLE2      | 0.006 | 0.72 | GLT6D1     | 0.011 | -0.73 |
| RNU5A-2P   | 0.006 | 0.72 | XIRP2-AS1  | 0.008 | -0.73 |
| DRD4       | 0.016 | 0.72 | CD226      | 0.013 | -0.73 |
| SLC7A2     | 0.015 | 0.72 | SNORD46    | 0.012 | -0.73 |
| MIR485     | 0.012 | 0.72 | PRKXP1     | 0.014 | -0.73 |
| ZNF532     | 0.015 | 0.72 | DAB1       | 0.016 | -0.73 |
| SCARNA8    | 0.017 | 0.72 | RFX4       | 0.014 | -0.73 |
| PTP4A3     | 0.012 | 0.72 | TMCO5B     | 0.015 | -0.73 |
| TMEM99     | 0.018 | 0.71 | SLC22A1    | 0.016 | -0.73 |
| SGSM3      | 0.017 | 0.71 | FAM133A    | 0.016 | -0.73 |
| GPR21      | 0.012 | 0.71 | CD83       | 0.012 | -0.72 |
| HOXC-AS1   | 0.022 | 0.71 | PER4       | 0.015 | -0.72 |
| RGMA       | 0.022 | 0.71 | MT1B       | 0.006 | -0.72 |
| FBXL13     | 0.007 | 0.70 | IL1RN      | 0.016 | -0.72 |
| KPNA5      | 0.019 | 0.70 | RNA5SP44   | 0.016 | -0.72 |
| C1GALT1C1  | 0.019 | 0.70 | SPINT1     | 0.006 | -0.72 |
| TRMT2A     | 0.023 | 0.70 | C2CD4A     | 0.018 | -0.72 |
| LIN37      | 0.014 | 0.70 | KCNJ9      | 0.004 | -0.72 |
| NUDT4      | 0.009 | 0.70 | LTA4H      | 0.011 | -0.71 |
| ZBTB11-AS1 | 0.021 | 0.69 | CLEC12A    | 0.018 | -0.71 |
| MAK        | 0.024 | 0.69 | ARMCX3-AS1 | 0.018 | -0.71 |
| CHRNE      | 0.020 | 0.69 | C11orf86   | 0.020 | -0.71 |
| SEC31A     | 0.023 | 0.69 | GUCD1      | 0.017 | -0.71 |
| CACHD1     | 0.027 | 0.69 | GAGE12H    | 0.011 | -0.71 |
| NKAIN4     | 0.022 | 0.69 | ARHGEF5    | 0.017 | -0.71 |
| TDH        | 0.026 | 0.69 | CD3EAP     | 0.012 | -0.71 |
| FAM194A    | 0.024 | 0.69 | FABP2      | 0.019 | -0.71 |
| MIR1224    | 0.011 | 0.69 | CD200R1    | 0.016 | -0.71 |
| DDIT4L     | 0.028 | 0.69 | NTN3       | 0.010 | -0.71 |
| LIPC       | 0.025 | 0.68 | RPS6KA5    | 0.016 | -0.71 |
| RCAN2      | 0.015 | 0.68 | SPIN2A     | 0.016 | -0.71 |
| IL6ST      | 0.024 | 0.68 | P2RX7      | 0.014 | -0.71 |
| PCDHB9     | 0.027 | 0.68 | HLA-DQA2   | 0.010 | -0.71 |
| TRAF7      | 0.028 | 0.68 | SNX10      | 0.015 | -0.71 |
| IFITM4P    | 0.026 | 0.68 | SNN        | 0.018 | -0.71 |
| HIC2       | 0.001 | 0.68 | LRRC8D     | 0.013 | -0.71 |
| MIR543     | 0.024 | 0.68 | ANKRD18B   | 0.018 | -0.70 |
| FAM195A    | 0.027 | 0.68 | EPB41L3    | 0.012 | -0.70 |
| FOXN4      | 0.011 | 0.68 | TRAJ56     | 0.018 | -0.70 |
| RANGRF     | 0.032 | 0.67 | TEKT2      | 0.023 | -0.70 |
| TTC38      | 0.033 | 0.67 | GOLGA6L4   | 0.008 | -0.70 |
| B3GNT8     | 0.028 | 0.67 | FAM90A12P  | 0.009 | -0.70 |
| GNG8       | 0.019 | 0.67 | VCX3A      | 0.008 | -0.70 |
| BIRC3      | 0.022 | 0.67 | HLA-DPB1   | 0.020 | -0.70 |
| SLC25A38   | 0.021 | 0.67 | NCEH1      | 0.015 | -0.70 |
| CTGF       | 0.019 | 0.67 | MS4A6A     | 0.014 | -0.70 |

|            |       |      |              |       |       |
|------------|-------|------|--------------|-------|-------|
| GPR56      | 0.031 | 0.67 | CERS4        | 0.024 | -0.70 |
| GATM-AS1   | 0.028 | 0.67 | KIAA1656     | 0.021 | -0.70 |
| PER1       | 0.020 | 0.67 | LRP5         | 0.020 | -0.70 |
| OR2A1      | 0.032 | 0.67 | ALDH1A1      | 0.015 | -0.69 |
| PRDM15     | 0.033 | 0.67 | MAP7D2       | 0.007 | -0.69 |
| RNU12      | 0.025 | 0.67 | APOBEC4      | 0.014 | -0.69 |
| ISG20      | 0.014 | 0.67 | ADAMTS3      | 0.025 | -0.69 |
| TMEM240    | 0.027 | 0.67 | RNA5-8SP3    | 0.019 | -0.69 |
| ACOT4      | 0.026 | 0.67 | LGALS2       | 0.019 | -0.69 |
| LINC00568  | 0.035 | 0.66 | ACP2         | 0.026 | -0.69 |
| CNOT3      | 0.033 | 0.66 | PARP15       | 0.020 | -0.69 |
| C4BPA      | 0.024 | 0.66 | NOD2         | 0.020 | -0.69 |
| HIST1H4B   | 0.032 | 0.66 | ALOX5AP      | 0.020 | -0.69 |
| GUSBP9     | 0.030 | 0.66 | SNCA         | 0.016 | -0.69 |
| OR52H1     | 0.029 | 0.66 | CES1         | 0.020 | -0.69 |
| LDLRAP1    | 0.035 | 0.66 | LINC00656    | 0.025 | -0.69 |
| YPEL3      | 0.032 | 0.66 | LILRB3       | 0.017 | -0.68 |
| SYMPK      | 0.021 | 0.66 | RNASE2       | 0.026 | -0.68 |
| ABCD4      | 0.038 | 0.66 | SNORA22      | 0.026 | -0.68 |
| MIR938     | 0.031 | 0.66 | IGHV3-43     | 0.027 | -0.68 |
| ARFGAP1    | 0.038 | 0.66 | FAM90A20P    | 0.024 | -0.68 |
| RAB6C      | 0.040 | 0.65 | SH2D5        | 0.026 | -0.68 |
| IGBP1      | 0.034 | 0.65 | MROH6        | 0.017 | -0.68 |
| MIR384     | 0.028 | 0.65 | WDFY4        | 0.029 | -0.68 |
| IGHD       | 0.029 | 0.65 | CSAG2        | 0.016 | -0.68 |
| RAB1B      | 0.031 | 0.65 | FCGR2A       | 0.017 | -0.68 |
| PYGL       | 0.036 | 0.65 | FAM90A1      | 0.008 | -0.67 |
| SMIM18     | 0.036 | 0.65 | ZFP69        | 0.017 | -0.67 |
| ZNF292     | 0.008 | 0.65 | SAMHD1       | 0.029 | -0.67 |
| TCEA3      | 0.039 | 0.65 | CXorf21      | 0.017 | -0.67 |
| JMY        | 0.041 | 0.65 | VRK1         | 0.021 | -0.67 |
| CNOT10     | 0.013 | 0.65 | GPR183       | 0.010 | -0.67 |
| IPO11      | 0.026 | 0.65 | RNU7-6P      | 0.023 | -0.67 |
| MON1A      | 0.022 | 0.65 | FLJ42102     | 0.023 | -0.67 |
| SOS1-IT1   | 0.029 | 0.65 | APOC1        | 0.019 | -0.67 |
| GTF2IRD2   | 0.031 | 0.65 | C1QTNF9B-AS1 | 0.024 | -0.67 |
| FAM19A5    | 0.034 | 0.65 | RNA5SP188    | 0.019 | -0.67 |
| STXBP5L    | 0.027 | 0.65 | TAF7L        | 0.017 | -0.67 |
| CLDN20     | 0.042 | 0.65 | SEPT14       | 0.033 | -0.67 |
| MARK4      | 0.024 | 0.65 | CD180        | 0.022 | -0.67 |
| MIR1185-2  | 0.032 | 0.65 | MAPKAPK3     | 0.018 | -0.67 |
| PLEKHM1    | 0.025 | 0.65 | MIR591       | 0.026 | -0.67 |
| GNL1       | 0.032 | 0.65 | TUBB4B       | 0.017 | -0.67 |
| TMEM255B   | 0.028 | 0.65 | LINC00700    | 0.020 | -0.66 |
| PPT2-EGFL8 | 0.029 | 0.65 | TRIM71       | 0.030 | -0.66 |
| GGCT       | 0.029 | 0.65 | RPL36P20     | 0.017 | -0.66 |
| ATG10      | 0.035 | 0.65 | CECR1        | 0.026 | -0.66 |

|                  |       |      |                    |       |       |
|------------------|-------|------|--------------------|-------|-------|
| <i>FBXW5</i>     | 0.028 | 0.65 | <i>SYK</i>         | 0.030 | -0.66 |
| <i>RPS29</i>     | 0.043 | 0.64 | <i>SNORA79</i>     | 0.018 | -0.66 |
| <i>ANK3</i>      | 0.031 | 0.64 | <i>TRDJ4</i>       | 0.026 | -0.66 |
| <i>FAM211A</i>   | 0.041 | 0.64 | <i>FAM83G</i>      | 0.029 | -0.66 |
| <i>FGFRL1</i>    | 0.040 | 0.64 | <i>AIF1</i>        | 0.019 | -0.66 |
| <i>SLC25A2</i>   | 0.030 | 0.64 | <i>LINC00548</i>   | 0.019 | -0.66 |
| <i>OIP5</i>      | 0.033 | 0.64 | <i>CXCL16</i>      | 0.027 | -0.66 |
| <i>HSFY2</i>     | 0.027 | 0.64 | <i>PLEK</i>        | 0.031 | -0.66 |
| <i>CCNB1IP1</i>  | 0.041 | 0.64 | <i>SERTAD1</i>     | 0.039 | -0.66 |
| <i>TRAJ21</i>    | 0.026 | 0.64 | <i>SECTM1</i>      | 0.020 | -0.66 |
| <i>TTC25</i>     | 0.033 | 0.64 | <i>NPAP1</i>       | 0.021 | -0.66 |
| <i>XRCC2</i>     | 0.008 | 0.64 | <i>SCGB3A2</i>     | 0.034 | -0.65 |
| <i>C19orf67</i>  | 0.041 | 0.64 | <i>HCLS1</i>       | 0.037 | -0.65 |
| <i>AKT3</i>      | 0.036 | 0.64 | <i>FCAR</i>        | 0.030 | -0.65 |
| <i>PROP1</i>     | 0.024 | 0.64 | <i>LPAR5</i>       | 0.039 | -0.65 |
| <i>PLEKHG2</i>   | 0.038 | 0.64 | <i>TMEM86B</i>     | 0.039 | -0.65 |
| <i>OR7E24</i>    | 0.038 | 0.64 | <i>MIR3973</i>     | 0.039 | -0.65 |
| <i>ADAMTS14</i>  | 0.042 | 0.64 | <i>AMY1A</i>       | 0.039 | -0.65 |
| <i>CCDC57</i>    | 0.048 | 0.64 | <i>NAP1L2</i>      | 0.035 | -0.65 |
| <i>CLK2P</i>     | 0.021 | 0.64 | <i>APOBEC1</i>     | 0.038 | -0.65 |
| <i>FLJ35934</i>  | 0.015 | 0.64 | <i>GAGE12C</i>     | 0.027 | -0.65 |
| <i>RUSC2</i>     | 0.016 | 0.64 | <i>THSD4</i>       | 0.041 | -0.65 |
| <i>GARNL3</i>    | 0.041 | 0.64 | <i>MIR3922</i>     | 0.035 | -0.65 |
| <i>KIAA1147</i>  | 0.041 | 0.63 | <i>VAMP8</i>       | 0.027 | -0.65 |
| <i>ZNF8</i>      | 0.047 | 0.63 | <i>ARSE</i>        | 0.038 | -0.65 |
| <i>MIR451A</i>   | 0.049 | 0.63 | <i>HLA-DQB1</i>    | 0.039 | -0.65 |
| <i>CAMTA2</i>    | 0.044 | 0.63 | <i>SCUBE1</i>      | 0.033 | -0.65 |
| <i>MIRLET7A3</i> | 0.026 | 0.63 | <i>NEUROD4</i>     | 0.025 | -0.65 |
| <i>FAM160B2</i>  | 0.044 | 0.63 | <i>SSX2</i>        | 0.025 | -0.65 |
| <i>SCARNA17</i>  | 0.047 | 0.63 | <i>AGRP</i>        | 0.041 | -0.65 |
| <i>OR8B8</i>     | 0.011 | 0.63 | <i>PRM3</i>        | 0.042 | -0.64 |
| <i>LNX1-AS2</i>  | 0.047 | 0.63 | <i>PPP1R3F</i>     | 0.044 | -0.64 |
| <i>BOLA1</i>     | 0.049 | 0.63 | <i>HCST</i>        | 0.021 | -0.64 |
| <i>ZNF891</i>    | 0.038 | 0.63 | <i>RALGDS</i>      | 0.027 | -0.64 |
| <i>FEZF1-AS1</i> | 0.048 | 0.63 | <i>ZNF555</i>      | 0.023 | -0.64 |
| <i>B3GALT4</i>   | 0.043 | 0.62 | <i>OR1L4</i>       | 0.032 | -0.64 |
| <i>MIR1297</i>   | 0.040 | 0.62 | <i>KRT23</i>       | 0.038 | -0.64 |
| <i>BRWD1-IT2</i> | 0.038 | 0.62 | <i>OR111</i>       | 0.028 | -0.64 |
| <i>KLHL4</i>     | 0.048 | 0.62 | <i>MSMP</i>        | 0.040 | -0.64 |
| <i>TMEM91</i>    | 0.044 | 0.62 | <i>SNORD116-11</i> | 0.045 | -0.64 |
| <i>C1RL-AS1</i>  | 0.044 | 0.62 | <i>SIGLEC16</i>    | 0.019 | -0.64 |
| <i>AK9</i>       | 0.049 | 0.62 | <i>AOX2P</i>       | 0.039 | -0.64 |
| <i>GRIK1-AS2</i> | 0.037 | 0.62 | <i>SIGLEC1</i>     | 0.033 | -0.64 |
| <i>DENND3</i>    | 0.035 | 0.62 | <i>ERAS</i>        | 0.041 | -0.64 |
| <i>LINC00484</i> | 0.043 | 0.62 | <i>PAQR8</i>       | 0.045 | -0.64 |
| <i>OR8J3</i>     | 0.045 | 0.62 | <i>HLA-DRA</i>     | 0.028 | -0.64 |
| <i>RNF167</i>    | 0.031 | 0.62 | <i>LINC00284</i>   | 0.044 | -0.64 |

|             |       |      |              |       |       |
|-------------|-------|------|--------------|-------|-------|
| PURA        | 0.042 | 0.62 | NKX3-1       | 0.046 | -0.64 |
| GPER        | 0.045 | 0.62 | RNA5SP64     | 0.046 | -0.64 |
| BRE         | 0.030 | 0.62 | SIGLEC9      | 0.046 | -0.64 |
| ADIRF       | 0.049 | 0.62 | BTK          | 0.030 | -0.64 |
| RNA5SP271   | 0.034 | 0.62 | POP1         | 0.029 | -0.64 |
| NUMB        | 0.044 | 0.62 | KLRC4-KLRK1  | 0.033 | -0.64 |
| KCNK18      | 0.020 | 0.62 | HVCN1        | 0.045 | -0.64 |
| FNDC1-IT1   | 0.047 | 0.61 | TMCO4        | 0.033 | -0.63 |
| TMEM104     | 0.033 | 0.61 | FAM78B       | 0.048 | -0.63 |
| RPL37       | 0.038 | 0.61 | PARK2        | 0.033 | -0.63 |
| ZNF296      | 0.029 | 0.61 | CABP7        | 0.022 | -0.63 |
| INPP5B      | 0.030 | 0.61 | FAM71A       | 0.034 | -0.63 |
| PHLDA3      | 0.032 | 0.61 | ANKRD20A3    | 0.017 | -0.63 |
| AKAP8L      | 0.043 | 0.61 | RGS8         | 0.032 | -0.63 |
| STK25       | 0.040 | 0.61 | NKAPP1       | 0.048 | -0.63 |
| ADRA1B      | 0.046 | 0.61 | MTPAP        | 0.030 | -0.63 |
| MUC1        | 0.037 | 0.61 | RNF113B      | 0.041 | -0.63 |
| C1S         | 0.046 | 0.61 | ASAH1        | 0.031 | -0.63 |
| RAB24       | 0.033 | 0.61 | THAP2        | 0.035 | -0.63 |
| IL21        | 0.049 | 0.61 | C16orf89     | 0.015 | -0.63 |
| NEBL-AS1    | 0.036 | 0.61 | CSF2RA       | 0.028 | -0.63 |
| SMAD3       | 0.047 | 0.61 | THOC3        | 0.046 | -0.63 |
| TXNRD2      | 0.035 | 0.61 | SPRR2B       | 0.045 | -0.63 |
| GOLGA8A     | 0.016 | 0.61 | GAPT         | 0.043 | -0.63 |
| MCTP2       | 0.021 | 0.61 | LIPT2        | 0.045 | -0.63 |
| INSIG1      | 0.030 | 0.60 | ADAM23       | 0.047 | -0.63 |
| HDAC5       | 0.049 | 0.60 | ITGAX        | 0.046 | -0.63 |
| NNMT        | 0.028 | 0.60 | KLRC2        | 0.050 | -0.63 |
| EGFL8       | 0.045 | 0.60 | ECHDC3       | 0.030 | -0.63 |
| WDR70       | 0.036 | 0.60 | SNORD88B     | 0.042 | -0.63 |
| WASF3       | 0.039 | 0.60 | BLNK         | 0.035 | -0.63 |
| MAN1B1      | 0.037 | 0.60 | TEX13A       | 0.012 | -0.63 |
| ISG20L2     | 0.042 | 0.60 | COBL         | 0.036 | -0.63 |
| EGFL6       | 0.037 | 0.60 | APOM         | 0.043 | -0.63 |
| PAN3-AS1    | 0.027 | 0.60 | HLA-DMB      | 0.034 | -0.62 |
| SPDYA       | 0.049 | 0.60 | ANKRD54      | 0.028 | -0.62 |
| USP27X-AS1  | 0.044 | 0.59 | MAST1        | 0.033 | -0.62 |
| DCUN1D2-AS1 | 0.048 | 0.59 | PRSS55       | 0.032 | -0.62 |
| MPDZ        | 0.049 | 0.59 | LPA          | 0.034 | -0.62 |
| HSFY1P1     | 0.042 | 0.59 | LINC00964    | 0.050 | -0.62 |
| MYO1D       | 0.041 | 0.59 | DYRK1B       | 0.032 | -0.62 |
| AUTS2       | 0.014 | 0.59 | USP26        | 0.033 | -0.62 |
| CUBN        | 0.036 | 0.59 | GAGE12J      | 0.043 | -0.62 |
| SSR4        | 0.039 | 0.59 | C9orf135-AS1 | 0.037 | -0.62 |
| KIAA1549L   | 0.049 | 0.59 | PRR22        | 0.031 | -0.62 |
| GPR124      | 0.041 | 0.59 | LIPN         | 0.046 | -0.62 |
| CCDC54      | 0.040 | 0.59 | CYSLTR2      | 0.035 | -0.62 |

|             |       |      |           |       |       |
|-------------|-------|------|-----------|-------|-------|
| GOLGA8B     | 0.024 | 0.59 | FAM90A10P | 0.043 | -0.62 |
| MIR3146     | 0.033 | 0.59 | CSH1      | 0.027 | -0.62 |
| YPEL1       | 0.040 | 0.59 | OR9A4     | 0.034 | -0.62 |
| DOCK9       | 0.037 | 0.59 | LINC00365 | 0.031 | -0.62 |
| MIR2116     | 0.025 | 0.59 | NOXA1     | 0.030 | -0.62 |
| DLEU2L      | 0.036 | 0.58 | INPP5J    | 0.015 | -0.62 |
| ZIC1        | 0.046 | 0.58 | RNASE1    | 0.032 | -0.62 |
| SNORD116-20 | 0.042 | 0.58 | SCARA5    | 0.047 | -0.62 |
| TXLNB       | 0.047 | 0.58 | SLC9A4    | 0.042 | -0.62 |
| C2orf15     | 0.046 | 0.58 | SNAR-F    | 0.045 | -0.62 |
| SPRY4       | 0.044 | 0.58 | MAGEA3    | 0.045 | -0.62 |
| SNX19       | 0.049 | 0.58 | WAS       | 0.032 | -0.62 |
| C1orf101    | 0.025 | 0.58 | C10orf85  | 0.038 | -0.62 |
| PFKFB4      | 0.034 | 0.58 | LINC00578 | 0.042 | -0.61 |
| STYXL1      | 0.049 | 0.58 | GCHFR     | 0.034 | -0.61 |
| OLFM1       | 0.043 | 0.57 | DBIL5P2   | 0.041 | -0.61 |
| SARDH       | 0.048 | 0.57 | PCSK2     | 0.023 | -0.61 |
| RIPK3       | 0.043 | 0.57 | CXCR4     | 0.030 | -0.61 |
| YBX3        | 0.045 | 0.57 | MIR338    | 0.048 | -0.61 |
| OR2B6       | 0.042 | 0.57 | KIR3DL2   | 0.043 | -0.61 |
| SNORD123    | 0.047 | 0.57 | GRM7-AS2  | 0.028 | -0.61 |
| RPS2        | 0.048 | 0.57 | LANCL2    | 0.040 | -0.61 |
| TGM3        | 0.046 | 0.57 | TLR1      | 0.038 | -0.61 |
| KRTAP4-12   | 0.032 | 0.57 | IGHV3-33  | 0.049 | -0.61 |
| PRDX2       | 0.040 | 0.57 | IRF8      | 0.049 | -0.61 |
| NRN1        | 0.032 | 0.55 | LINC00901 | 0.035 | -0.61 |
| BSN         | 0.036 | 0.55 | PILRA     | 0.030 | -0.61 |
| RNF214      | 0.037 | 0.54 | FOXG1     | 0.034 | -0.61 |
| AFF1        | 0.047 | 0.54 | IGBP1-AS1 | 0.010 | -0.61 |
| PEBP1       | 0.048 | 0.54 | HFE2      | 0.044 | -0.60 |
| TMEM209     | 0.049 | 0.53 | CTSL1P2   | 0.049 | -0.60 |
| MIR770      | 0.047 | 0.52 | WDR38     | 0.043 | -0.60 |
| TRADD       | 0.032 | 0.52 | IQCF3     | 0.046 | -0.60 |
| PPFIA3      | 0.042 | 0.51 | MIR517B   | 0.045 | -0.60 |
| ZNF616      | 0.037 | 0.49 | SNORA5A   | 0.028 | -0.60 |
| INPP5K      | 0.045 | 0.46 | IL10RA    | 0.046 | -0.60 |
|             |       |      | SCARNA27  | 0.043 | -0.60 |
|             |       |      | IFI30     | 0.033 | -0.60 |
|             |       |      | ENDOU     | 0.049 | -0.60 |
|             |       |      | PTPRJ     | 0.043 | -0.60 |
|             |       |      | GREM2     | 0.011 | -0.59 |
|             |       |      | ADAMTS16  | 0.036 | -0.59 |
|             |       |      | TYROBP    | 0.046 | -0.59 |
|             |       |      | ZNF90     | 0.039 | -0.59 |
|             |       |      | UBQLNL    | 0.045 | -0.59 |
|             |       |      | TLR2      | 0.043 | -0.59 |
|             |       |      | RBP2      | 0.050 | -0.59 |

|  |  |  |                    |       |       |
|--|--|--|--------------------|-------|-------|
|  |  |  | <i>PI15</i>        | 0.034 | -0.58 |
|  |  |  | <i>SSX4</i>        | 0.045 | -0.58 |
|  |  |  | <i>OR1L6</i>       | 0.037 | -0.58 |
|  |  |  | <i>PPAN-P2RY11</i> | 0.028 | -0.58 |
|  |  |  | <i>KRTAP13-1</i>   | 0.034 | -0.58 |
|  |  |  | <i>PLEKHB2</i>     | 0.045 | -0.58 |
|  |  |  | <i>SLC36A2</i>     | 0.041 | -0.58 |
|  |  |  | <i>ARMCX4</i>      | 0.045 | -0.58 |
|  |  |  | <i>LACTBL1</i>     | 0.010 | -0.58 |
|  |  |  | <i>GS52</i>        | 0.026 | -0.57 |
|  |  |  | <i>FLJ25917</i>    | 0.016 | -0.57 |
|  |  |  | <i>BMP10</i>       | 0.041 | -0.57 |
|  |  |  | <i>CYBB</i>        | 0.046 | -0.57 |
|  |  |  | <i>MC3R</i>        | 0.040 | -0.57 |
|  |  |  | <i>C8A</i>         | 0.021 | -0.57 |
|  |  |  | <i>SLC10A4</i>     | 0.047 | -0.57 |
|  |  |  | <i>HMGA1P7</i>     | 0.050 | -0.57 |
|  |  |  | <i>OVOL1</i>       | 0.035 | -0.57 |
|  |  |  | <i>FSCN3</i>       | 0.048 | -0.57 |
|  |  |  | <i>TARM1</i>       | 0.046 | -0.56 |
|  |  |  | <i>TCAP</i>        | 0.046 | -0.56 |
|  |  |  | <i>LINC00388</i>   | 0.039 | -0.56 |
|  |  |  | <i>CCDC19</i>      | 0.020 | -0.56 |
|  |  |  | <i>MIR3157</i>     | 0.029 | -0.56 |
|  |  |  | <i>GOLGA6L6</i>    | 0.048 | -0.56 |
|  |  |  | <i>PPT1</i>        | 0.023 | -0.56 |
|  |  |  | <i>FAM107B</i>     | 0.050 | -0.56 |
|  |  |  | <i>IGHD2-21</i>    | 0.029 | -0.56 |
|  |  |  | <i>CT64</i>        | 0.047 | -0.55 |
|  |  |  | <i>SMTNL2</i>      | 0.025 | -0.55 |
|  |  |  | <i>MIR3666</i>     | 0.015 | -0.55 |
|  |  |  | <i>CCDC142</i>     | 0.024 | -0.54 |
|  |  |  | <i>LINC00698</i>   | 0.034 | -0.54 |
|  |  |  | <i>OR52K2</i>      | 0.020 | -0.54 |
|  |  |  | <i>ACR</i>         | 0.027 | -0.54 |
|  |  |  | <i>TDO2</i>        | 0.042 | -0.54 |
|  |  |  | <i>MIR3937</i>     | 0.042 | -0.54 |
|  |  |  | <i>PANX3</i>       | 0.045 | -0.54 |
|  |  |  | <i>PEG3-AS1</i>    | 0.039 | -0.53 |
|  |  |  | <i>RAD54L</i>      | 0.035 | -0.53 |
|  |  |  | <i>SLC26A7</i>     | 0.033 | -0.53 |
|  |  |  | <i>THEG5</i>       | 0.045 | -0.53 |
|  |  |  | <i>SLC24A2</i>     | 0.029 | -0.52 |
|  |  |  | <i>LINC00239</i>   | 0.041 | -0.51 |
|  |  |  | <i>GH1</i>         | 0.045 | -0.51 |
|  |  |  | <i>WDR87</i>       | 0.031 | -0.49 |

|  |  |  |              |       |       |
|--|--|--|--------------|-------|-------|
|  |  |  | <i>SYCE1</i> | 0.044 | -0.48 |
|--|--|--|--------------|-------|-------|

*\*Duplicate, uncharacterized and non-annotated gene transcripts were removed*
