# Supplementary material for: RNA Microarray Analysis of Macroscopically Normal Articular Cartilage from Knees Undergoing Partial Medial Meniscectomy: Potential Prediction of the Risk for Developing Osteoarthritis
Source: PubMed Central journal article supplement (PMC4865200; doi:10.1371/journal.pone.0155373), 2016-05-12
Supplement: pone.0155373.s002.pdf [file pone.0155373.s002.pdf]

**Supplementary Table 2: Gene transcripts correlated with BMI\***

| <b>Gene symbol</b>                            | <b>P value</b> | <b>r</b> | <b>Gene symbol</b>                            | <b>P value</b> | <b>r</b> |
|-----------------------------------------------|----------------|----------|-----------------------------------------------|----------------|----------|
| <i>Gene transcripts positively correlated</i> |                |          | <i>Gene transcripts negatively correlated</i> |                |          |
| CYP7A1                                        | 0.001          | 0.85     | ERCC2                                         | 0.002          | -0.80    |
| LINC00616                                     | 0.000          | 0.84     | TRIM49                                        | 0.004          | -0.80    |
| MGC39372                                      | 0.001          | 0.83     | GDF11                                         | 0.005          | -0.79    |
| TMEM235                                       | 0.001          | 0.82     | ZFYVE28                                       | 0.006          | -0.78    |
| CCDC79                                        | 0.005          | 0.79     | AANAT                                         | 0.006          | -0.78    |
| SLC26A5                                       | 0.005          | 0.78     | LAMTOR2                                       | 0.004          | -0.78    |
| ZNF852                                        | 0.006          | 0.78     | BAAT                                          | 0.007          | -0.78    |
| DDR1                                          | 0.004          | 0.77     | DIEXF                                         | 0.003          | -0.77    |
| LRRC2                                         | 0.007          | 0.77     | FGD1                                          | 0.008          | -0.77    |
| LYPD6                                         | 0.008          | 0.77     | SLC35B1                                       | 0.010          | -0.76    |
| FFAR1                                         | 0.008          | 0.76     | TMEM243                                       | 0.002          | -0.76    |
| IGLV4-69                                      | 0.008          | 0.76     | HEXIM1                                        | 0.010          | -0.76    |
| CDHR3                                         | 0.010          | 0.76     | MICB                                          | 0.010          | -0.75    |
| RGS21                                         | 0.011          | 0.75     | PSIMCT-1                                      | 0.003          | -0.75    |
| ATXN3L                                        | 0.008          | 0.75     | SGOL1-AS1                                     | 0.011          | -0.75    |
| RASSF10                                       | 0.012          | 0.75     | HIST1H2AJ                                     | 0.010          | -0.75    |
| LINC00235                                     | 0.009          | 0.74     | KIAA0247                                      | 0.002          | -0.74    |
| RBMS3-AS2                                     | 0.008          | 0.74     | RNASEH2B-AS1                                  | 0.005          | -0.74    |
| SORBS2                                        | 0.013          | 0.74     | CCDC28B                                       | 0.015          | -0.73    |
| HAO2                                          | 0.007          | 0.74     | ZNF846                                        | 0.008          | -0.73    |
| HNRNPKP3                                      | 0.014          | 0.74     | MIR4703                                       | 0.012          | -0.73    |
| RIC8A                                         | 0.014          | 0.73     | PGP                                           | 0.003          | -0.73    |
| SLC6A15                                       | 0.008          | 0.73     | RHOA-IT1                                      | 0.004          | -0.73    |
| AADA4L4                                       | 0.011          | 0.73     | FAM174B                                       | 0.016          | -0.72    |
| ANK1                                          | 0.008          | 0.73     | NXPH4                                         | 0.014          | -0.72    |
| MGC21881                                      | 0.005          | 0.73     | ARFIP2                                        | 0.007          | -0.72    |
| HES3                                          | 0.015          | 0.73     | AGBL5                                         | 0.013          | -0.72    |
| GPR26                                         | 0.015          | 0.73     | OXNAD1                                        | 0.014          | -0.72    |
| FLJ42842                                      | 0.010          | 0.73     | FERD3L                                        | 0.020          | -0.71    |
| ACSS2                                         | 0.017          | 0.72     | GPR141                                        | 0.006          | -0.71    |
| ISM2                                          | 0.011          | 0.72     | CPOX                                          | 0.021          | -0.71    |
| LINC00467                                     | 0.013          | 0.72     | SLFNL1-AS1                                    | 0.019          | -0.70    |
| RPL29                                         | 0.014          | 0.72     | MICA                                          | 0.013          | -0.70    |
| HLA-A                                         | 0.017          | 0.72     | CEL                                           | 0.023          | -0.70    |
| CASS4                                         | 0.008          | 0.72     | FAS                                           | 0.023          | -0.70    |
| MEGF8                                         | 0.017          | 0.72     | ARHGAP22                                      | 0.020          | -0.70    |
| ITGAL                                         | 0.010          | 0.72     | TRIM11                                        | 0.024          | -0.70    |
| IL23A                                         | 0.009          | 0.71     | CHSY3                                         | 0.019          | -0.70    |
| LRRC71                                        | 0.003          | 0.71     | FASN                                          | 0.018          | -0.69    |
| TTPA                                          | 0.015          | 0.71     | TOP3A                                         | 0.022          | -0.69    |
| GABRG1                                        | 0.010          | 0.71     | CRIP2                                         | 0.018          | -0.69    |
| PTH2                                          | 0.020          | 0.71     | MIR4282                                       | 0.016          | -0.69    |
| FAM47C                                        | 0.016          | 0.71     | HTR1B                                         | 0.027          | -0.69    |

|             |       |      |             |       |       |
|-------------|-------|------|-------------|-------|-------|
| TERT        | 0.016 | 0.71 | EMC8        | 0.011 | -0.69 |
| KCNH8       | 0.020 | 0.71 | CDC14B      | 0.015 | -0.68 |
| HPYR1       | 0.012 | 0.71 | FAM118A     | 0.028 | -0.68 |
| MIR4765     | 0.020 | 0.70 | MIR451A     | 0.016 | -0.68 |
| RIPPLY3     | 0.023 | 0.70 | EPS8L2      | 0.023 | -0.68 |
| CARD17      | 0.022 | 0.70 | ZNF77       | 0.023 | -0.68 |
| PPP2R2B-IT1 | 0.021 | 0.70 | EXOC8       | 0.029 | -0.68 |
| UPF3A       | 0.015 | 0.70 | PYCR2       | 0.013 | -0.68 |
| AKAP14      | 0.013 | 0.70 | PPAT        | 0.011 | -0.68 |
| CLCN7       | 0.015 | 0.70 | TRBV21OR9-2 | 0.025 | -0.68 |
| LINC00879   | 0.019 | 0.70 | IL1RAP      | 0.022 | -0.68 |
| XCR1        | 0.021 | 0.70 | SPAG1       | 0.027 | -0.68 |
| TAS2R14     | 0.018 | 0.70 | DGCR2       | 0.030 | -0.68 |
| COL4A3      | 0.024 | 0.70 | DIAPH3-AS1  | 0.030 | -0.68 |
| NRCAM       | 0.023 | 0.70 | FAM120C     | 0.027 | -0.68 |
| AP4S1       | 0.016 | 0.69 | RASL12      | 0.019 | -0.68 |
| ZNF676      | 0.012 | 0.69 | USP42       | 0.031 | -0.67 |
| ELF3        | 0.026 | 0.69 | EIF2S3L     | 0.031 | -0.67 |
| KCNQ1DN     | 0.025 | 0.69 | LYRM7       | 0.012 | -0.67 |
| RASGRF1     | 0.017 | 0.69 | CLIC6       | 0.020 | -0.67 |
| IGF2BP3     | 0.019 | 0.68 | TMEM5       | 0.027 | -0.67 |
| MRGPRD      | 0.023 | 0.68 | KHSRP       | 0.033 | -0.67 |
| NIPA1       | 0.010 | 0.68 | CACNA1C-AS4 | 0.029 | -0.67 |
| PSG11       | 0.025 | 0.68 | IL36RN      | 0.024 | -0.67 |
| ZNF345      | 0.015 | 0.68 | MIR450A2    | 0.029 | -0.67 |
| DMD-AS3     | 0.028 | 0.68 | ADAT1       | 0.016 | -0.67 |
| EMX2OS      | 0.022 | 0.68 | PRRT3       | 0.032 | -0.67 |
| FLJ27255    | 0.019 | 0.68 | ZMAT2       | 0.036 | -0.66 |
| GDF5        | 0.027 | 0.68 | KDM4A-AS1   | 0.031 | -0.66 |
| MROH2A      | 0.024 | 0.68 | CHD6        | 0.033 | -0.66 |
| LINC00502   | 0.015 | 0.68 | ASB8        | 0.036 | -0.66 |
| MIR129-1    | 0.028 | 0.68 | GDI1        | 0.031 | -0.66 |
| RMDN3       | 0.020 | 0.68 | BTD         | 0.032 | -0.66 |
| FGF12-AS2   | 0.016 | 0.68 | ETV6        | 0.032 | -0.66 |
| LINC00951   | 0.029 | 0.68 | RNA5SP268   | 0.014 | -0.66 |
| GYPA        | 0.030 | 0.68 | NPRL2       | 0.021 | -0.66 |
| LINC00933   | 0.026 | 0.68 | F8A3        | 0.022 | -0.66 |
| ANKDD1A     | 0.023 | 0.68 | MIR1184-1   | 0.022 | -0.66 |
| OR3A4P      | 0.005 | 0.67 | POLD4       | 0.028 | -0.65 |
| PATE3       | 0.028 | 0.67 | MIMT1       | 0.038 | -0.65 |
| MIR4268     | 0.025 | 0.67 | KIAA1958    | 0.035 | -0.65 |
| POU2F3      | 0.030 | 0.67 | SLC35F1     | 0.030 | -0.65 |
| PTRH1       | 0.022 | 0.67 | TIGD4       | 0.040 | -0.65 |
| EXPH5       | 0.023 | 0.67 | CBLN3       | 0.030 | -0.65 |
| NPFFR1      | 0.031 | 0.67 | MYO10       | 0.024 | -0.65 |
| ANKRD2      | 0.033 | 0.67 | MRPL52      | 0.025 | -0.65 |
| LINC00494   | 0.025 | 0.67 | PRSS48      | 0.033 | -0.65 |

|           |       |      |           |       |       |
|-----------|-------|------|-----------|-------|-------|
| TMCO5A    | 0.034 | 0.67 | CYP7B1    | 0.028 | -0.64 |
| ENTHD2    | 0.001 | 0.67 | CCT6P3    | 0.034 | -0.64 |
| GIN51     | 0.032 | 0.67 | SNORD13P2 | 0.043 | -0.64 |
| ANKRD53   | 0.008 | 0.67 | TMEM127   | 0.030 | -0.64 |
| HBQ1      | 0.010 | 0.67 | ARL14     | 0.044 | -0.64 |
| TTC29     | 0.022 | 0.67 | SEC22C    | 0.027 | -0.64 |
| PRSS12    | 0.023 | 0.67 | LAIR2     | 0.041 | -0.64 |
| FLJ45513  | 0.009 | 0.67 | CRYM-AS1  | 0.046 | -0.64 |
| RAMP2-AS1 | 0.035 | 0.66 | OR1Q1     | 0.044 | -0.64 |
| LINC00910 | 0.022 | 0.66 | SNORA58   | 0.045 | -0.64 |
| SOX1      | 0.013 | 0.66 | LRRC37A2  | 0.019 | -0.64 |
| CNTNAP3   | 0.013 | 0.66 | CEP152    | 0.028 | -0.64 |
| LINC00427 | 0.030 | 0.66 | DEDD2     | 0.045 | -0.64 |
| ARMC2     | 0.032 | 0.66 | RBM42     | 0.036 | -0.64 |
| TSRM      | 0.017 | 0.66 | MIR376C   | 0.041 | -0.64 |
| GPHB5     | 0.010 | 0.66 | PPIL2     | 0.047 | -0.63 |
| PNPLA2    | 0.028 | 0.66 | XBP1      | 0.018 | -0.63 |
| ALX3      | 0.036 | 0.66 | MROH1     | 0.048 | -0.63 |
| CHRNA2    | 0.030 | 0.66 | ATAT1     | 0.049 | -0.63 |
| OCA2      | 0.032 | 0.66 | CCRL1     | 0.024 | -0.63 |
| GPR25     | 0.029 | 0.66 | LOXL4     | 0.039 | -0.63 |
| KCNK17    | 0.024 | 0.66 | HOXD9     | 0.047 | -0.63 |
| SLC22A14  | 0.032 | 0.66 | MIR3167   | 0.048 | -0.63 |
| MIR4791   | 0.029 | 0.66 | FAM3C     | 0.019 | -0.63 |
| FAM156A   | 0.024 | 0.66 | CACNA1D   | 0.030 | -0.63 |
| HOXA-AS3  | 0.025 | 0.66 | SKAP2     | 0.044 | -0.62 |
| AIPL1     | 0.035 | 0.66 | PLGRKT    | 0.042 | -0.62 |
| PDIK1L    | 0.035 | 0.66 | CRMP1     | 0.047 | -0.62 |
| HELZ2     | 0.036 | 0.66 | SF3A2     | 0.044 | -0.62 |
| VMAC      | 0.030 | 0.66 | FRMD6-AS1 | 0.032 | -0.62 |
| AGFG2     | 0.036 | 0.65 | HAVCR1P1  | 0.017 | -0.62 |
| MIR4540   | 0.020 | 0.65 | RNF40     | 0.036 | -0.62 |
| CORIN     | 0.035 | 0.65 | MIR7-3    | 0.047 | -0.62 |
| RNA5SP66  | 0.024 | 0.65 | ZSWIM3    | 0.048 | -0.62 |
| TBX22     | 0.038 | 0.65 | SNORA70G  | 0.017 | -0.62 |
| F2RL1     | 0.032 | 0.65 | AP4B1-AS1 | 0.037 | -0.62 |
| GOLGA2P2Y | 0.019 | 0.65 | SNAI1     | 0.046 | -0.62 |
| FUT2      | 0.030 | 0.65 | NIPSNAP1  | 0.043 | -0.61 |
| FLJ44385  | 0.038 | 0.65 | RNA5SP63  | 0.041 | -0.61 |
| HTR2A-AS1 | 0.038 | 0.65 | PARD3B    | 0.039 | -0.61 |
| KIAA1875  | 0.039 | 0.65 | LIMS1     | 0.042 | -0.61 |
| PLIN4     | 0.038 | 0.65 | MRRF      | 0.028 | -0.61 |
| SLC6A20   | 0.032 | 0.65 | DHRSX     | 0.037 | -0.61 |
| OR14I1    | 0.034 | 0.65 | ANKRD13C  | 0.035 | -0.61 |
| SP2       | 0.034 | 0.65 | MIR3173   | 0.045 | -0.61 |
| STK11     | 0.039 | 0.65 | WWTR1     | 0.022 | -0.61 |
| FAM138A   | 0.026 | 0.65 | BAX       | 0.047 | -0.60 |

|              |       |      |               |       |       |
|--------------|-------|------|---------------|-------|-------|
| PRR15L       | 0.041 | 0.64 | TRIM33        | 0.025 | -0.60 |
| RCOR2        | 0.040 | 0.64 | AMZ2          | 0.021 | -0.60 |
| SPP1         | 0.033 | 0.64 | HELLPAR       | 0.049 | -0.60 |
| DGAT2        | 0.042 | 0.64 | MED13L        | 0.020 | -0.60 |
| GAL3ST3      | 0.034 | 0.64 | COX6A1        | 0.049 | -0.60 |
| MIR4502      | 0.035 | 0.64 | KATNBL1       | 0.038 | -0.60 |
| FAM87A       | 0.031 | 0.64 | SH3D21        | 0.044 | -0.60 |
| SLC25A1      | 0.026 | 0.64 | CHURC1-FNTB   | 0.048 | -0.60 |
| SDIM1        | 0.043 | 0.64 | LETMD1        | 0.015 | -0.60 |
| PYGM         | 0.034 | 0.64 | KCNQ5-IT1     | 0.020 | -0.59 |
| NOS1         | 0.041 | 0.64 | SNRPN         | 0.026 | -0.59 |
| RASA2-IT1    | 0.040 | 0.64 | BTBD6         | 0.049 | -0.59 |
| MARS2        | 0.041 | 0.64 | PPP1R11       | 0.050 | -0.59 |
| ATP6V0E2-AS1 | 0.042 | 0.64 | TLE4          | 0.031 | -0.59 |
| EHHADH       | 0.020 | 0.64 | ITGB3BP       | 0.026 | -0.59 |
| TRPM2        | 0.013 | 0.64 | COX7A2        | 0.029 | -0.59 |
| IGLV3-1      | 0.027 | 0.64 | ENTPD3-AS1    | 0.032 | -0.58 |
| HS3ST3B1     | 0.016 | 0.64 | IRF9          | 0.037 | -0.58 |
| TAPBPL       | 0.035 | 0.64 | TMEM214       | 0.044 | -0.58 |
| AMY2B        | 0.044 | 0.64 | GPATCH8       | 0.029 | -0.58 |
| OR1A2        | 0.034 | 0.64 | HECTD3        | 0.029 | -0.58 |
| RNA5SP361    | 0.020 | 0.64 | SNORA11C      | 0.041 | -0.58 |
| SHROOM3      | 0.036 | 0.64 | ITCH-IT1      | 0.048 | -0.58 |
| RFPL4B       | 0.037 | 0.64 | MIR340        | 0.041 | -0.58 |
| PRDM14       | 0.027 | 0.64 | TMEM183B      | 0.025 | -0.57 |
| NLGN4X       | 0.038 | 0.64 | TMEM30B       | 0.043 | -0.57 |
| CDC42EP2     | 0.020 | 0.64 | UGCG          | 0.045 | -0.57 |
| BEND3        | 0.039 | 0.64 | BAG4          | 0.033 | -0.57 |
| FLJ16341     | 0.044 | 0.64 | FAM57A        | 0.027 | -0.56 |
| ALOX15B      | 0.012 | 0.63 | FGF18         | 0.047 | -0.56 |
| PUS1         | 0.039 | 0.63 | NMT1          | 0.020 | -0.56 |
| OR1N2        | 0.028 | 0.63 | ELOF1         | 0.050 | -0.56 |
| WT1          | 0.037 | 0.63 | GRK4          | 0.038 | -0.56 |
| MIR3178      | 0.013 | 0.63 | EXOC4         | 0.044 | -0.56 |
| SOSTDC1      | 0.047 | 0.63 | STAT3         | 0.027 | -0.56 |
| STAT4        | 0.034 | 0.63 | ZDHHC16       | 0.049 | -0.55 |
| LGALS3BP     | 0.034 | 0.63 | STON1-GTF2A1L | 0.045 | -0.55 |
| PPP3R1       | 0.042 | 0.63 | POC1B-GALNT4  | 0.047 | -0.55 |
| AVPR2        | 0.016 | 0.63 | CRIP1         | 0.046 | -0.55 |
| IQSEC3       | 0.034 | 0.63 | GNAT2         | 0.041 | -0.55 |
| RNA5SP486    | 0.039 | 0.63 | ZBED6         | 0.036 | -0.54 |
| BPIFB2       | 0.030 | 0.63 | ARFGEF1       | 0.035 | -0.54 |
| CLEC1A       | 0.030 | 0.63 | OSBP          | 0.027 | -0.53 |
| MOV10L1      | 0.039 | 0.63 | SERPINB9      | 0.044 | -0.52 |
| HOXB9        | 0.050 | 0.63 | SYNPO         | 0.045 | -0.52 |
| DEFB132      | 0.049 | 0.63 | AHCY          | 0.042 | -0.52 |
| PTPRT        | 0.032 | 0.63 | TGFBRAP1      | 0.032 | -0.51 |

|            |       |      |          |       |       |
|------------|-------|------|----------|-------|-------|
| SLFN14     | 0.048 | 0.63 | TMEM161B | 0.031 | -0.50 |
| LIM2       | 0.040 | 0.63 | HSPA5    | 0.018 | -0.46 |
| TMEM88B    | 0.037 | 0.63 | INF2     | 0.027 | -0.46 |
| ACTRT1     | 0.047 | 0.63 | SETD5    | 0.048 | -0.46 |
| NECAB2     | 0.016 | 0.63 | SDHC     | 0.036 | -0.46 |
| ERVMER34-1 | 0.047 | 0.63 | TPSD1    | 0.045 | -0.45 |
| CLIC5      | 0.035 | 0.63 | EMC1     | 0.046 | -0.43 |
| FCGRT      | 0.037 | 0.63 | GNAT3    | 0.047 | -0.42 |
| FLJ20444   | 0.036 | 0.63 |          |       |       |
| ASTN2      | 0.043 | 0.63 |          |       |       |
| FAM83C-AS1 | 0.028 | 0.63 |          |       |       |
| LEP        | 0.045 | 0.63 |          |       |       |
| MLK7-AS1   | 0.009 | 0.63 |          |       |       |
| FAM25G     | 0.033 | 0.63 |          |       |       |
| PSKH2      | 0.045 | 0.62 |          |       |       |
| NT5DC4     | 0.028 | 0.62 |          |       |       |
| MIR519B    | 0.014 | 0.62 |          |       |       |
| SRL        | 0.014 | 0.62 |          |       |       |
| KRTAP10-4  | 0.019 | 0.62 |          |       |       |
| GNAT1      | 0.044 | 0.62 |          |       |       |
| GUCY2C     | 0.047 | 0.62 |          |       |       |
| SYT15      | 0.025 | 0.62 |          |       |       |
| CAPS2      | 0.045 | 0.62 |          |       |       |
| KRTAP2-1   | 0.037 | 0.62 |          |       |       |
| SLC13A1    | 0.035 | 0.62 |          |       |       |
| VSX1       | 0.046 | 0.62 |          |       |       |
| DPP3       | 0.043 | 0.62 |          |       |       |
| GYS1       | 0.040 | 0.62 |          |       |       |
| RNA5-8SP4  | 0.026 | 0.62 |          |       |       |
| ERVV-1     | 0.034 | 0.62 |          |       |       |
| OR4D9      | 0.047 | 0.62 |          |       |       |
| LMO2       | 0.042 | 0.62 |          |       |       |
| SSTR5-AS1  | 0.037 | 0.62 |          |       |       |
| IL17B      | 0.043 | 0.62 |          |       |       |
| TRAV4      | 0.034 | 0.62 |          |       |       |
| MIR3914-1  | 0.043 | 0.62 |          |       |       |
| SLC22A3    | 0.049 | 0.62 |          |       |       |
| PDGFD      | 0.033 | 0.62 |          |       |       |
| NEIL2      | 0.034 | 0.61 |          |       |       |
| MKRN7P     | 0.032 | 0.61 |          |       |       |
| FCAMR      | 0.016 | 0.61 |          |       |       |
| TTLL11-IT1 | 0.043 | 0.61 |          |       |       |
| TMEM233    | 0.022 | 0.61 |          |       |       |
| CCK        | 0.037 | 0.61 |          |       |       |
| SPACA5     | 0.044 | 0.61 |          |       |       |
| PZP        | 0.049 | 0.61 |          |       |       |
| LGALS7B    | 0.033 | 0.61 |          |       |       |

|              |       |      |  |  |  |
|--------------|-------|------|--|--|--|
| HBD          | 0.017 | 0.61 |  |  |  |
| TEX13B       | 0.042 | 0.61 |  |  |  |
| MIR3180-4    | 0.045 | 0.61 |  |  |  |
| MIR551B      | 0.037 | 0.61 |  |  |  |
| GRIN3A       | 0.049 | 0.61 |  |  |  |
| MOS          | 0.019 | 0.61 |  |  |  |
| IGHG1        | 0.032 | 0.61 |  |  |  |
| PON1         | 0.047 | 0.61 |  |  |  |
| OR56A4       | 0.047 | 0.61 |  |  |  |
| HSP90AB2P    | 0.050 | 0.60 |  |  |  |
| MIR3161      | 0.033 | 0.60 |  |  |  |
| GLUD1P2      | 0.045 | 0.60 |  |  |  |
| OR2A4        | 0.038 | 0.60 |  |  |  |
| SPRY1        | 0.042 | 0.60 |  |  |  |
| TRAJ14       | 0.039 | 0.60 |  |  |  |
| VASP         | 0.047 | 0.60 |  |  |  |
| LINC00052    | 0.025 | 0.60 |  |  |  |
| CASQ1        | 0.030 | 0.60 |  |  |  |
| SEMA3G       | 0.021 | 0.60 |  |  |  |
| RBM22P1      | 0.046 | 0.60 |  |  |  |
| MIR4708      | 0.044 | 0.60 |  |  |  |
| ISL1         | 0.041 | 0.60 |  |  |  |
| AQP7         | 0.048 | 0.59 |  |  |  |
| IFNG-AS1     | 0.035 | 0.59 |  |  |  |
| SLC9A7       | 0.042 | 0.59 |  |  |  |
| FGF5         | 0.022 | 0.59 |  |  |  |
| AGAP9        | 0.039 | 0.59 |  |  |  |
| MIR128-2     | 0.040 | 0.59 |  |  |  |
| RNU6-54      | 0.047 | 0.59 |  |  |  |
| ZNF485       | 0.023 | 0.59 |  |  |  |
| PIGL         | 0.047 | 0.59 |  |  |  |
| MIR134       | 0.044 | 0.59 |  |  |  |
| SLC4A1       | 0.027 | 0.59 |  |  |  |
| SLC51B       | 0.038 | 0.59 |  |  |  |
| TMEM229A     | 0.045 | 0.59 |  |  |  |
| GBP6         | 0.028 | 0.58 |  |  |  |
| OPTC         | 0.037 | 0.58 |  |  |  |
| GOLGA8UP     | 0.023 | 0.58 |  |  |  |
| OLFM3        | 0.047 | 0.58 |  |  |  |
| KLK1         | 0.043 | 0.58 |  |  |  |
| RNA5SP338    | 0.033 | 0.58 |  |  |  |
| FIGN         | 0.050 | 0.58 |  |  |  |
| SOX13        | 0.035 | 0.58 |  |  |  |
| NAALADL2-AS2 | 0.042 | 0.58 |  |  |  |
| FFAR4        | 0.050 | 0.58 |  |  |  |
| OSBPL7       | 0.014 | 0.57 |  |  |  |
| CCL13        | 0.028 | 0.57 |  |  |  |

|            |       |      |  |  |  |
|------------|-------|------|--|--|--|
| TSSK1B     | 0.049 | 0.57 |  |  |  |
| LINC00869  | 0.031 | 0.57 |  |  |  |
| ATP7B      | 0.037 | 0.57 |  |  |  |
| FAM19A3    | 0.048 | 0.57 |  |  |  |
| REG3G      | 0.048 | 0.56 |  |  |  |
| LINC00279  | 0.039 | 0.56 |  |  |  |
| GLP1R      | 0.011 | 0.56 |  |  |  |
| PROKR1     | 0.047 | 0.56 |  |  |  |
| TMEM92     | 0.042 | 0.55 |  |  |  |
| MMRN1      | 0.049 | 0.55 |  |  |  |
| FAM92B     | 0.044 | 0.55 |  |  |  |
| CNTD2      | 0.025 | 0.55 |  |  |  |
| FLJ46134   | 0.040 | 0.54 |  |  |  |
| CXCL13     | 0.044 | 0.54 |  |  |  |
| DCXR       | 0.046 | 0.54 |  |  |  |
| LY6G6F     | 0.022 | 0.54 |  |  |  |
| A2MP1      | 0.040 | 0.54 |  |  |  |
| SPANXN5    | 0.022 | 0.54 |  |  |  |
| EFNA3      | 0.022 | 0.53 |  |  |  |
| MIR1295A   | 0.046 | 0.53 |  |  |  |
| KCTD17     | 0.025 | 0.53 |  |  |  |
| MIR96      | 0.042 | 0.53 |  |  |  |
| MIR3119-1  | 0.029 | 0.53 |  |  |  |
| P2RX1      | 0.048 | 0.53 |  |  |  |
| UBE2U      | 0.045 | 0.52 |  |  |  |
| CXorf67    | 0.039 | 0.51 |  |  |  |
| SLC35G3    | 0.027 | 0.51 |  |  |  |
| FLJ42351   | 0.024 | 0.51 |  |  |  |
| ZAN        | 0.047 | 0.51 |  |  |  |
| MIR302E    | 0.040 | 0.50 |  |  |  |
| TACR3      | 0.025 | 0.49 |  |  |  |
| WBSCR16    | 0.037 | 0.49 |  |  |  |
| SORCS3-AS1 | 0.043 | 0.49 |  |  |  |
| CASR       | 0.033 | 0.49 |  |  |  |
| MT1DP      | 0.046 | 0.48 |  |  |  |
| HPCAL4     | 0.045 | 0.46 |  |  |  |
| ARC        | 0.047 | 0.45 |  |  |  |
| MIR4486    | 0.049 | 0.44 |  |  |  |
| SATB2-AS1  | 0.032 | 0.43 |  |  |  |

*\*Duplicate, uncharacterized and non-annotated gene transcripts were removed*

*BMI = body mass index*
