# Supplementary material for: RNA Microarray Analysis of Macroscopically Normal Articular Cartilage from Knees Undergoing Partial Medial Meniscectomy: Potential Prediction of the Risk for Developing Osteoarthritis
Source: PubMed Central journal article supplement (PMC4865200; doi:10.1371/journal.pone.0155373), 2016-05-12
Supplement: pone.0155373.s003.pdf [file pone.0155373.s003.pdf]

**Supplementary Table 3: Gene transcripts differentially expressed by sex\***

| <b>Gene symbol</b>                              | <b>P value</b> | <b>LS mean (females)</b> | <b>LS mean (males)</b> | <b>Ratio</b> | <b>Fold change</b> |
|-------------------------------------------------|----------------|--------------------------|------------------------|--------------|--------------------|
| <i>Gene transcripts up-regulated in females</i> |                |                          |                        |              |                    |
| S100A8                                          | 0.032          | 7.30                     | 5.74                   | 2.95         | 2.95               |
| CCDC144A                                        | 0.024          | 6.23                     | 5.00                   | 2.35         | 2.35               |
| CSN1S1                                          | 0.048          | 4.40                     | 3.21                   | 2.28         | 2.28               |
| MEDAG                                           | 0.039          | 7.33                     | 6.20                   | 2.18         | 2.18               |
| TREML5P                                         | 0.005          | 4.35                     | 3.35                   | 2.00         | 2.00               |
| ITGBL1                                          | 0.049          | 9.14                     | 8.22                   | 1.88         | 1.88               |
| CD68                                            | 0.038          | 9.81                     | 8.90                   | 1.88         | 1.88               |
| CSNK2A3                                         | 0.025          | 5.38                     | 4.48                   | 1.87         | 1.87               |
| SPDYE5                                          | 0.045          | 6.13                     | 5.23                   | 1.86         | 1.86               |
| MIR329-1                                        | 0.022          | 5.48                     | 4.65                   | 1.78         | 1.78               |
| UST                                             | 0.040          | 6.24                     | 5.47                   | 1.71         | 1.71               |
| ZDBF2                                           | 0.028          | 6.01                     | 5.25                   | 1.68         | 1.68               |
| MIR374B                                         | 0.047          | 2.80                     | 2.05                   | 1.67         | 1.67               |
| USP32P1                                         | 0.043          | 5.16                     | 4.45                   | 1.63         | 1.63               |
| DSC2                                            | 0.023          | 5.92                     | 5.23                   | 1.62         | 1.62               |
| RNU7-22P                                        | 0.007          | 4.15                     | 3.47                   | 1.61         | 1.61               |
| CRYZ                                            | 0.049          | 6.79                     | 6.11                   | 1.59         | 1.59               |
| MIR1180                                         | 0.009          | 5.08                     | 4.42                   | 1.58         | 1.58               |
| SNORA36B                                        | 0.018          | 5.43                     | 4.78                   | 1.56         | 1.56               |
| SNORD121A                                       | 0.029          | 2.43                     | 1.81                   | 1.54         | 1.54               |
| LINC00709                                       | 0.027          | 3.10                     | 2.49                   | 1.53         | 1.53               |
| NSUN6                                           | 0.041          | 5.72                     | 5.12                   | 1.52         | 1.52               |
| YEATS2-AS1                                      | 0.026          | 3.32                     | 2.72                   | 1.52         | 1.52               |
| DRAM2                                           | 0.035          | 6.22                     | 5.63                   | 1.51         | 1.51               |
| RASGEF1B                                        | 0.043          | 5.63                     | 5.04                   | 1.50         | 1.50               |
|                                                 |                |                          |                        |              |                    |
|                                                 |                |                          |                        |              |                    |
|                                                 |                |                          |                        |              |                    |
|                                                 |                |                          |                        |              |                    |
|                                                 |                |                          |                        |              |                    |
|                                                 |                |                          |                        |              |                    |
|                                                 |                |                          |                        |              |                    |
|                                                 |                |                          |                        |              |                    |
|                                                 |                |                          |                        |              |                    |
|                                                 |                |                          |                        |              |                    |
|                                                 |                |                          |                        |              |                    |
|                                                 |                |                          |                        |              |                    |
|                                                 |                |                          |                        |              |                    |
|                                                 |                |                          |                        |              |                    |
|                                                 |                |                          |                        |              |                    |
|                                                 |                |                          |                        |              |                    |
|                                                 |                |                          |                        |              |                    |
|                                                 |                |                          |                        |              |                    |
|                                                 |                |                          |                        |              |                    |
|                                                 |                |                          |                        |              |                    |
|                                                 |                |                          |                        |              |                    |
|                                                 |                |                          |                        |              |                    |

\*Duplicate, uncharacterized and non-annotated gene transcripts were removed

| <b>Gene symbol</b>                                | <b>P value</b> | <b>LS mean (females)</b> | <b>LS mean (males)</b> | <b>Ratio</b> | <b>Fold change</b> |
|---------------------------------------------------|----------------|--------------------------|------------------------|--------------|--------------------|
| <i>Gene transcripts down-regulated in females</i> |                |                          |                        |              |                    |
| SLPI                                              | 0.013          | 5.32                     | 6.84                   | 0.35         | -2.88              |
| SFRP2                                             | 0.041          | 4.90                     | 6.12                   | 0.43         | -2.34              |
| MIR4655                                           | 0.010          | 3.77                     | 4.78                   | 0.49         | -2.02              |
| MIR548S                                           | 0.005          | 1.36                     | 2.27                   | 0.53         | -1.88              |
| RNU7-49P                                          | 0.034          | 4.68                     | 5.56                   | 0.54         | -1.84              |
| CEACAM5                                           | 0.028          | 2.88                     | 3.75                   | 0.55         | -1.83              |
| HCG22                                             | 0.007          | 3.90                     | 4.68                   | 0.58         | -1.72              |
| MIR4436A                                          | 0.050          | 3.64                     | 4.40                   | 0.59         | -1.69              |
| MTRNR2L4                                          | 0.050          | 2.68                     | 3.42                   | 0.60         | -1.67              |
| MIR4729                                           | 0.042          | 2.76                     | 3.48                   | 0.61         | -1.64              |
| PODXL                                             | 0.032          | 5.44                     | 6.15                   | 0.61         | -1.64              |
| THRB-AS1                                          | 0.039          | 3.47                     | 4.18                   | 0.61         | -1.63              |
| CYP2C8                                            | 0.037          | 2.97                     | 3.67                   | 0.61         | -1.63              |
| DPPA2                                             | 0.003          | 2.22                     | 2.92                   | 0.61         | -1.63              |
| RNU6-78P                                          | 0.028          | 2.43                     | 3.13                   | 0.62         | -1.62              |
| RNY3P2                                            | 0.042          | 2.48                     | 3.18                   | 0.62         | -1.62              |
| LINC00086                                         | 0.031          | 4.17                     | 4.86                   | 0.62         | -1.61              |
| OR5D14                                            | 0.024          | 4.03                     | 4.71                   | 0.62         | -1.61              |
| MROH9                                             | 0.023          | 2.16                     | 2.85                   | 0.62         | -1.61              |
| LINC00280                                         | 0.045          | 3.87                     | 4.55                   | 0.62         | -1.60              |
| MIR609                                            | 0.044          | 4.54                     | 5.22                   | 0.63         | -1.60              |
| RNA5SP496                                         | 0.032          | 2.43                     | 3.11                   | 0.63         | -1.60              |
| FAM27E3                                           | 0.020          | 3.49                     | 4.15                   | 0.63         | -1.58              |
| MIR4640                                           | 0.012          | 3.50                     | 4.16                   | 0.63         | -1.58              |
| RNA5SP81                                          | 0.032          | 2.07                     | 2.72                   | 0.64         | -1.57              |
| XXYLT1-AS2                                        | 0.014          | 3.31                     | 3.96                   | 0.64         | -1.57              |
| YME1L1                                            | 0.035          | 3.02                     | 3.66                   | 0.64         | -1.56              |
| CYP4Z2P                                           | 0.026          | 1.89                     | 2.53                   | 0.64         | -1.56              |
| POM121L2                                          | 0.003          | 3.61                     | 4.24                   | 0.64         | -1.56              |
| TRBV7-8                                           | 0.011          | 1.85                     | 2.48                   | 0.64         | -1.55              |
| SERPINF2                                          | 0.050          | 3.83                     | 4.45                   | 0.65         | -1.53              |
| OR7E2P                                            | 0.024          | 3.99                     | 4.60                   | 0.65         | -1.53              |
| RNU6ATAC5P                                        | 0.028          | 5.07                     | 5.67                   | 0.66         | -1.52              |
| TXNDC8                                            | 0.040          | 3.35                     | 3.95                   | 0.66         | -1.52              |
| GBP7                                              | 0.012          | 2.79                     | 3.40                   | 0.66         | -1.52              |
| MIR133B                                           | 0.013          | 4.05                     | 4.65                   | 0.66         | -1.52              |
| LINC00410                                         | 0.043          | 3.42                     | 4.00                   | 0.67         | -1.50              |
| OR9A2                                             | 0.003          | 2.74                     | 3.32                   | 0.67         | -1.50              |
