# Supplementary material for: RNA Microarray Analysis of Macroscopically Normal Articular Cartilage from Knees Undergoing Partial Medial Meniscectomy: Potential Prediction of the Risk for Developing Osteoarthritis
Source: PubMed Central journal article supplement (PMC4865200; doi:10.1371/journal.pone.0155373), 2016-05-12
Supplement: pone.0155373.s004.pdf [file pone.0155373.s004.pdf]

**Supplementary Table 4: Gene transcripts relative intensity values**

| <b>Gene Symbol</b> | <b>Mean</b> | <b>Maximum</b> | <b>Minimum</b> |
|--------------------|-------------|----------------|----------------|
| RN7SL1             | 13.06       | 13.24          | 12.73          |
| FTSJD2             | 13.00       | 13.16          | 12.55          |
| CYTB               | 12.77       | 12.90          | 12.32          |
| ND2                | 12.71       | 12.91          | 12.26          |
| LOC100652902       | 12.69       | 12.84          | 12.43          |
| SH3KBP1            | 12.68       | 12.94          | 12.20          |
| COX1               | 12.64       | 12.76          | 12.20          |
| ATP13A5            | 12.63       | 12.74          | 12.29          |
| CCDC104            | 12.62       | 12.74          | 12.24          |
| RPL41              | 12.58       | 12.66          | 12.36          |
| TPT1               | 12.51       | 12.70          | 11.96          |
| PTPRO              | 12.49       | 12.70          | 12.06          |
| FN1                | 12.33       | 12.68          | 12.00          |
| TLE1               | 12.26       | 12.43          | 11.93          |
| EEF1A1             | 12.15       | 12.30          | 11.98          |
| RPS11              | 12.07       | 12.19          | 11.81          |
| RPS27              | 11.96       | 12.10          | 11.72          |
| NPIP3              | 11.94       | 12.21          | 11.65          |
| FKSG49             | 11.94       | 12.23          | 11.58          |
| CDR1               | 11.90       | 12.27          | 11.11          |
| DNAPT3             | 11.80       | 12.07          | 11.54          |
| TUBA1B             | 11.77       | 12.16          | 11.22          |
| LUM                | 11.77       | 12.10          | 11.48          |
| OTTHUMG00000158412 | 11.75       | 11.94          | 11.54          |
| ND6                | 11.70       | 12.15          | 11.24          |
| PRG4               | 11.66       | 12.20          | 9.43           |
| MALAT1             | 11.65       | 11.76          | 11.35          |
| FTL                | 11.62       | 12.17          | 11.21          |
| RPS2               | 11.58       | 11.74          | 11.47          |
| RPL13AP5           | 11.48       | 11.57          | 11.18          |
| CHAD               | 11.42       | 12.10          | 8.41           |
| FMOD               | 11.41       | 11.90          | 10.87          |
| SNORA48            | 11.34       | 11.61          | 10.92          |
| RPL21              | 11.26       | 11.37          | 11.08          |
| HNRNPA1P10         | 11.25       | 11.38          | 11.16          |
| UBC                | 11.24       | 11.53          | 10.81          |
| RPL27              | 11.19       | 11.39          | 10.99          |
| RPL12              | 11.17       | 11.24          | 10.98          |
| MIR4461            | 11.14       | 11.47          | 10.66          |
| BGN                | 11.11       | 11.66          | 10.34          |
| HTRA1              | 11.01       | 11.87          | 9.65           |
| NEAT1              | 10.93       | 11.38          | 10.23          |
| PRELP              | 10.86       | 11.41          | 10.12          |
| RPS28              | 10.82       | 10.97          | 10.58          |
| HSP90AB1           | 10.81       | 10.90          | 10.70          |
| ASPN               | 10.77       | 11.89          | 9.26           |
| PLA2G2A            | 10.76       | 11.47          | 9.56           |

|                    |       |       |       |
|--------------------|-------|-------|-------|
| H3F3A              | 10.69 | 10.86 | 10.41 |
| EEF1G              | 10.69 | 10.94 | 10.11 |
| C6orf48            | 10.64 | 11.02 | 10.35 |
| UBA52              | 10.58 | 10.75 | 10.08 |
| CTGF               | 10.57 | 11.33 | 9.66  |
| MGP                | 10.57 | 11.22 | 10.09 |
| YBX1               | 10.56 | 10.79 | 10.01 |
| MT1X               | 10.56 | 11.89 | 9.88  |
| NPC2               | 10.55 | 10.80 | 10.12 |
| LAPTM4A            | 10.51 | 10.78 | 10.18 |
| ITM2B              | 10.51 | 10.68 | 10.34 |
| IBSP               | 10.50 | 11.50 | 7.17  |
| NPIP5              | 10.50 | 10.73 | 10.26 |
| TUBA1A             | 10.48 | 11.17 | 9.41  |
| CYTL1              | 10.40 | 11.90 | 5.91  |
| LINC00657          | 10.40 | 10.83 | 10.10 |
| MIR4442            | 10.39 | 11.13 | 9.67  |
| TMSB10             | 10.38 | 10.93 | 9.42  |
| RPS5               | 10.37 | 10.66 | 9.74  |
| NPIPA1             | 10.27 | 10.45 | 10.04 |
| HBA2               | 10.27 | 11.39 | 8.47  |
| SNORD13            | 10.26 | 11.00 | 8.91  |
| RPL19              | 10.26 | 10.48 | 10.08 |
| RHOA               | 10.25 | 10.53 | 9.63  |
| RPS19              | 10.24 | 10.47 | 9.82  |
| SNORD18C           | 10.20 | 10.38 | 9.72  |
| CD99               | 10.15 | 10.69 | 9.37  |
| VIM-AS1            | 10.13 | 10.83 | 8.93  |
| RPL21P28           | 10.11 | 10.34 | 9.89  |
| HIST2H2AC          | 10.10 | 10.40 | 9.75  |
| HSP90B1            | 10.06 | 10.38 | 9.76  |
| CALR               | 10.00 | 10.43 | 9.33  |
| OGN                | 10.00 | 10.74 | 7.63  |
| OTTHUMG00000171045 | 9.94  | 10.29 | 9.10  |
| RPS15              | 9.94  | 10.11 | 9.59  |
| HNRNPA2B1          | 9.93  | 10.14 | 9.75  |
| HLA-DRA            | 9.89  | 11.33 | 8.53  |
| CFH                | 9.89  | 10.85 | 8.04  |
| COL3A1             | 9.87  | 10.79 | 8.22  |
| NDUFA1             | 9.86  | 9.96  | 9.73  |
| DDX5               | 9.86  | 10.09 | 9.46  |
| PSAP               | 9.86  | 10.50 | 9.40  |
| ANXA2P2            | 9.84  | 10.32 | 9.35  |
| CHI3L1             | 9.80  | 11.22 | 7.47  |
| NBPF9              | 9.79  | 10.03 | 9.41  |
| NPIPA5             | 9.77  | 9.93  | 9.46  |
| SH3BGRL3           | 9.75  | 10.09 | 9.25  |
| RPL26              | 9.73  | 9.80  | 9.59  |
| SCARNA9            | 9.71  | 10.02 | 9.35  |

|              |      |       |      |
|--------------|------|-------|------|
| COL6A3       | 9.71 | 10.75 | 8.16 |
| EDF1         | 9.69 | 9.92  | 9.45 |
| SOD1         | 9.68 | 9.88  | 9.45 |
| MIR1282      | 9.67 | 9.95  | 9.23 |
| ANGPTL2      | 9.67 | 10.49 | 8.17 |
| NPIP11       | 9.66 | 9.85  | 9.07 |
| POSTN        | 9.66 | 11.80 | 7.21 |
| CHI3L2       | 9.66 | 11.06 | 5.89 |
| SBDS         | 9.65 | 9.90  | 9.40 |
| PTMS         | 9.63 | 9.92  | 9.39 |
| PCOLCE2      | 9.62 | 9.96  | 9.12 |
| PLOD2        | 9.61 | 10.21 | 8.51 |
| SMG1P1       | 9.61 | 9.91  | 9.05 |
| COL1A2       | 9.61 | 10.77 | 7.59 |
| COMP         | 9.61 | 10.46 | 8.87 |
| CCDC80       | 9.60 | 10.28 | 8.55 |
| RPL11        | 9.60 | 9.73  | 9.34 |
| EDC4         | 9.59 | 10.39 | 8.79 |
| ACAN         | 9.57 | 10.63 | 8.05 |
| COX6A1       | 9.57 | 9.87  | 9.21 |
| FRZB         | 9.55 | 10.90 | 5.84 |
| PCMTD1       | 9.55 | 9.81  | 9.28 |
| ABI3BP       | 9.53 | 9.92  | 8.61 |
| CAPNS1       | 9.52 | 9.88  | 9.20 |
| SNAI2        | 9.51 | 9.91  | 9.19 |
| COX7A1       | 9.50 | 9.83  | 9.13 |
| RPL5         | 9.49 | 9.69  | 9.34 |
| DAD1         | 9.48 | 9.96  | 8.84 |
| RPS13        | 9.46 | 9.60  | 9.22 |
| TNC          | 9.45 | 10.84 | 7.97 |
| IGFBP7       | 9.43 | 10.06 | 8.66 |
| LOC100190986 | 9.42 | 9.72  | 8.89 |
| MIR1244-1    | 9.42 | 9.63  | 9.06 |
| PTMA         | 9.42 | 9.63  | 9.06 |
| PPP1R3C      | 9.41 | 9.95  | 8.40 |
| RPL18A       | 9.40 | 9.77  | 8.68 |
| ENPP1        | 9.40 | 9.74  | 8.50 |
| PLXDC2       | 9.39 | 9.79  | 8.93 |
| COX4I1       | 9.39 | 9.72  | 8.94 |
| CILP         | 9.38 | 10.54 | 7.52 |
| SRSF5        | 9.36 | 9.59  | 9.02 |
| LOC441081    | 9.36 | 9.64  | 8.97 |
| ACTG1        | 9.35 | 9.89  | 8.92 |
| HSPA5        | 9.34 | 9.92  | 8.82 |
| IGLC1        | 9.32 | 9.56  | 9.11 |
| CSTB         | 9.32 | 9.74  | 8.79 |
| MMP3         | 9.31 | 11.26 | 6.22 |
| SPP1         | 9.30 | 10.49 | 8.13 |
| SNRPD2       | 9.29 | 9.63  | 8.81 |

|                    |      |       |      |
|--------------------|------|-------|------|
| OST4               | 9.29 | 9.67  | 8.83 |
| C2orf40            | 9.28 | 10.10 | 6.78 |
| CD68               | 9.28 | 10.36 | 7.85 |
| SPARC              | 9.27 | 9.54  | 8.47 |
| DDX17              | 9.27 | 9.59  | 8.64 |
| RPS8               | 9.26 | 9.39  | 9.08 |
| POMP               | 9.26 | 9.61  | 8.76 |
| ATP5B              | 9.24 | 9.68  | 8.51 |
| OTTHUMG00000163389 | 9.24 | 9.46  | 8.85 |
| CRIP1              | 9.23 | 10.02 | 8.11 |
| HNRNPDL            | 9.22 | 9.44  | 8.58 |
| SUMO2              | 9.22 | 9.52  | 8.96 |
| TIMP1              | 9.21 | 9.83  | 8.71 |
| HNRNPA1            | 9.21 | 9.37  | 8.90 |
| A2M                | 9.20 | 9.76  | 7.98 |
| NOTCH2NL           | 9.20 | 9.63  | 8.85 |
| TPM4               | 9.17 | 10.06 | 7.94 |
| IVNS1ABP           | 9.15 | 9.62  | 8.34 |
| RPL36              | 9.13 | 9.26  | 8.90 |
| HLA-A              | 9.12 | 9.41  | 8.71 |
| SERPINA3           | 9.12 | 10.55 | 7.65 |
| SEPT15             | 9.10 | 9.53  | 8.50 |
| NBPF16             | 9.09 | 9.37  | 8.78 |
| LOC100509635       | 9.09 | 9.62  | 8.57 |
| COL12A1            | 9.09 | 9.96  | 7.06 |
| MT1CP              | 9.09 | 10.46 | 8.66 |
| MT1F               | 9.08 | 9.73  | 8.40 |
| SNORD89            | 9.07 | 9.59  | 8.14 |
| EIF1               | 9.04 | 9.44  | 8.64 |
| RMRP               | 9.04 | 9.54  | 8.05 |
| ANKH               | 9.03 | 9.51  | 8.11 |
| SDC2               | 9.02 | 9.46  | 8.41 |
| PRDX5              | 9.02 | 9.49  | 8.46 |
| SERINC3            | 9.01 | 9.49  | 8.38 |
| SPARCL1            | 9.01 | 9.88  | 7.51 |
| TMED2              | 9.00 | 9.34  | 8.56 |
| HSPA8              | 8.99 | 9.57  | 8.36 |
| EEF2               | 8.98 | 9.38  | 8.07 |
| B2M                | 8.97 | 9.26  | 8.70 |
| S100A11            | 8.97 | 9.27  | 8.62 |
| MIR3689A           | 8.96 | 10.27 | 8.32 |
| TUBB2A             | 8.95 | 9.81  | 7.78 |
| SNHG8              | 8.95 | 10.03 | 8.34 |
| ANXA1              | 8.94 | 9.47  | 7.83 |
| LOC100507369       | 8.93 | 9.31  | 8.48 |
| BRK1               | 8.93 | 9.35  | 8.32 |
| ATP5I              | 8.92 | 9.28  | 8.55 |
| DCN                | 8.91 | 9.37  | 8.61 |
| ATP6V0E1           | 8.90 | 9.51  | 8.11 |

|           |      |       |      |
|-----------|------|-------|------|
| MIR3907   | 8.90 | 9.45  | 8.42 |
| CRISPLD1  | 8.90 | 10.35 | 6.30 |
| CLU       | 8.89 | 9.52  | 8.42 |
| HIST1H2AC | 8.89 | 9.17  | 8.44 |
| ATP5H     | 8.89 | 9.26  | 8.29 |
| RAB1A     | 8.85 | 9.30  | 8.07 |
| IGHG1     | 8.85 | 9.66  | 8.25 |
| LOC728734 | 8.84 | 9.06  | 8.33 |
| SNORD46   | 8.84 | 9.59  | 8.07 |
| PMP22     | 8.84 | 9.30  | 8.01 |
| TXN       | 8.84 | 9.36  | 8.32 |
| FGFBP2    | 8.83 | 9.29  | 7.87 |
| SLC38A2   | 8.83 | 9.16  | 8.31 |
| RPS3A     | 8.82 | 8.92  | 8.70 |
| CLEC3A    | 8.81 | 10.78 | 5.67 |
| SEC61G    | 8.80 | 9.26  | 8.42 |
| MT2A      | 8.80 | 9.25  | 7.44 |
| KDEL2     | 8.80 | 9.39  | 8.20 |
| FLJ45340  | 8.80 | 9.31  | 8.31 |
| DCDC5     | 8.80 | 9.24  | 8.53 |
| MBNL1     | 8.79 | 9.16  | 8.44 |
| EDIL3     | 8.78 | 9.32  | 8.10 |
| CSDE1     | 8.78 | 9.18  | 7.88 |
| ZFAS1     | 8.77 | 9.28  | 8.23 |
| CRTAC1    | 8.77 | 9.83  | 7.35 |
| VIM       | 8.76 | 9.35  | 7.69 |
| HSBP1     | 8.74 | 9.17  | 8.03 |
| NBPF24    | 8.74 | 9.14  | 8.40 |
| SCARNA7   | 8.73 | 9.34  | 7.65 |
| PRKAR1A   | 8.73 | 9.13  | 8.18 |
| DPT       | 8.73 | 10.24 | 6.96 |
| MIF       | 8.72 | 9.52  | 8.20 |
| SEC31A    | 8.72 | 9.22  | 8.08 |
| TUBB      | 8.70 | 9.57  | 7.71 |
| TOMM7     | 8.68 | 8.91  | 8.50 |
| APP       | 8.67 | 8.87  | 8.47 |
| NBPF11    | 8.67 | 9.05  | 8.37 |
| SRP9      | 8.67 | 8.97  | 8.17 |
| DST       | 8.66 | 9.35  | 7.77 |
| RNA5SP195 | 8.66 | 9.06  | 8.16 |
| TCEB2     | 8.66 | 9.04  | 8.17 |
| ZRANB2    | 8.66 | 8.90  | 8.30 |
| TM9SF2    | 8.65 | 9.08  | 7.99 |
| RAB7A     | 8.64 | 8.99  | 7.99 |
| UGDH      | 8.63 | 9.47  | 7.69 |
| MMP2      | 8.63 | 9.93  | 7.05 |
| EIF3K     | 8.63 | 8.91  | 8.11 |
| GABARAP   | 8.63 | 9.01  | 8.12 |
| OAZ1      | 8.62 | 9.11  | 7.72 |

|              |      |       |      |
|--------------|------|-------|------|
| WASF2        | 8.62 | 9.06  | 7.65 |
| CST3         | 8.61 | 9.13  | 7.71 |
| EEF1B2       | 8.61 | 8.81  | 8.31 |
| APLP2        | 8.61 | 9.12  | 7.87 |
| IGFBP6       | 8.61 | 9.04  | 7.75 |
| P4HA1        | 8.61 | 9.17  | 8.04 |
| COPB2        | 8.61 | 9.14  | 7.95 |
| WBP5         | 8.61 | 9.32  | 7.70 |
| MXRA5        | 8.60 | 10.38 | 5.85 |
| ITGBL1       | 8.60 | 9.65  | 7.07 |
| TMEM59       | 8.60 | 8.90  | 8.20 |
| TXNIP        | 8.60 | 9.55  | 7.55 |
| PPIB         | 8.60 | 9.09  | 7.78 |
| GTF2IP1      | 8.59 | 8.83  | 8.06 |
| CTA-313A17.5 | 8.59 | 9.56  | 8.15 |
| LOC100272216 | 8.59 | 9.18  | 7.82 |
| PKM          | 8.58 | 8.99  | 7.96 |
| MYL9         | 8.58 | 9.13  | 7.55 |
| FLJ14186     | 8.58 | 9.06  | 8.19 |
| CTSK         | 8.57 | 9.57  | 6.91 |
| SF3B1        | 8.57 | 8.78  | 8.16 |
| SLC25A6      | 8.57 | 8.93  | 7.98 |
| LOC101060684 | 8.56 | 9.01  | 8.01 |
| SRSF11       | 8.56 | 8.82  | 8.06 |
| ERRFI1       | 8.56 | 9.23  | 6.87 |
| FAM106CP     | 8.56 | 9.61  | 7.82 |
| RPL13AP20    | 8.55 | 8.78  | 8.16 |
| WSB1         | 8.55 | 8.96  | 8.25 |
| SPDYE7P      | 8.54 | 9.03  | 8.24 |
| LGALS1       | 8.54 | 9.37  | 7.51 |
| HIF1A        | 8.54 | 9.04  | 7.51 |
| ARF1         | 8.53 | 9.06  | 8.08 |
| RPS21        | 8.53 | 8.77  | 8.41 |
| CD46         | 8.52 | 8.89  | 7.73 |
| ARL6IP5      | 8.52 | 8.94  | 7.85 |
| LOC100996522 | 8.51 | 8.91  | 8.08 |
| RABAC1       | 8.51 | 9.36  | 7.84 |
| ACTR2        | 8.51 | 8.92  | 7.93 |
| CDO1         | 8.51 | 9.35  | 7.43 |
| ELL2         | 8.50 | 9.09  | 7.93 |
| PLP2         | 8.50 | 9.16  | 7.61 |
| MIR2909      | 8.50 | 9.58  | 7.89 |
| COL2A1       | 8.49 | 9.64  | 6.67 |
| APOD         | 8.49 | 11.27 | 4.97 |
| GJA1         | 8.49 | 10.11 | 6.40 |
| TIMP3        | 8.49 | 8.95  | 7.82 |
| LUC7L3       | 8.49 | 8.74  | 8.04 |
| HNRNPH3      | 8.48 | 8.62  | 8.19 |
| NFIX         | 8.48 | 8.91  | 7.91 |

|              |      |      |      |
|--------------|------|------|------|
| CALU         | 8.47 | 9.71 | 7.27 |
| IFITM2       | 8.47 | 8.84 | 7.86 |
| EIF4B        | 8.46 | 8.69 | 8.05 |
| EIF4G2       | 8.46 | 9.11 | 7.58 |
| TMEM219      | 8.46 | 8.88 | 8.04 |
| TRAM1        | 8.46 | 8.83 | 8.15 |
| ARPC5        | 8.45 | 9.04 | 7.60 |
| INPP5B       | 8.45 | 8.75 | 8.12 |
| ANXA5        | 8.45 | 9.06 | 7.65 |
| LOC731275    | 8.44 | 8.94 | 7.89 |
| CD55         | 8.44 | 9.28 | 7.63 |
| MSN          | 8.44 | 8.97 | 7.62 |
| EMP3         | 8.43 | 9.33 | 7.38 |
| MIR3689B     | 8.43 | 9.83 | 7.64 |
| NSA2         | 8.43 | 8.74 | 8.13 |
| MRPS21       | 8.43 | 8.86 | 7.86 |
| LRP1         | 8.41 | 8.81 | 7.88 |
| MIR54811     | 8.41 | 9.33 | 7.72 |
| BNIP3L       | 8.41 | 8.81 | 7.73 |
| SNORD3B-1    | 8.40 | 8.99 | 7.96 |
| CCDC47       | 8.40 | 8.83 | 7.94 |
| SNORD3A      | 8.40 | 9.00 | 7.94 |
| SNAR-E       | 8.39 | 9.22 | 7.76 |
| PRDX1        | 8.39 | 8.88 | 7.53 |
| SPDYE2       | 8.38 | 8.87 | 8.04 |
| GUSBP9       | 8.38 | 8.71 | 7.94 |
| HNRNPU       | 8.38 | 8.55 | 7.75 |
| NCKAP1       | 8.37 | 8.79 | 7.74 |
| LOC100288069 | 8.37 | 8.77 | 7.86 |
| COPZ2        | 8.36 | 8.86 | 7.32 |
| UACA         | 8.35 | 8.83 | 7.81 |
| FSTL1        | 8.35 | 9.21 | 7.63 |
| NOP10        | 8.34 | 9.01 | 7.12 |
| F8A1         | 8.34 | 8.85 | 7.49 |
| EFEMP1       | 8.34 | 9.53 | 7.49 |
| ECM2         | 8.34 | 9.15 | 7.09 |
| LOC100288102 | 8.34 | 8.84 | 7.86 |
| RSU1         | 8.33 | 8.63 | 7.76 |
| NOMO2        | 8.33 | 8.76 | 7.96 |
| IQGAP1       | 8.32 | 8.81 | 7.50 |
| KIF5B        | 8.32 | 9.14 | 7.58 |
| SERPING1     | 8.31 | 9.06 | 7.64 |
| SRSF3        | 8.31 | 8.67 | 7.71 |
| NOMO3        | 8.31 | 8.73 | 7.93 |
| IL13RA1      | 8.31 | 8.62 | 7.86 |
| C17orf89     | 8.31 | 8.63 | 7.90 |
| GOLGA8A      | 8.31 | 8.92 | 7.60 |
| SPDYE2B      | 8.31 | 8.80 | 7.97 |
| TPTE         | 8.30 | 8.66 | 7.75 |

|                    |      |      |      |
|--------------------|------|------|------|
| HP1BP3             | 8.30 | 8.68 | 7.50 |
| PAPSS2             | 8.30 | 9.69 | 7.29 |
| OTTHUMG00000177010 | 8.29 | 8.86 | 7.69 |
| CLIC4              | 8.29 | 8.69 | 7.64 |
| SSR1               | 8.29 | 8.71 | 7.87 |
| RPS16              | 8.29 | 8.41 | 8.10 |
| HADHA              | 8.29 | 8.72 | 7.50 |
| PLS3               | 8.28 | 9.13 | 6.94 |
| CBWD1              | 8.28 | 8.83 | 7.90 |
| SULF2              | 8.27 | 8.94 | 7.13 |
| STT3A              | 8.26 | 8.80 | 7.75 |
| XRCC5              | 8.26 | 8.71 | 7.55 |
| SAP18              | 8.26 | 8.54 | 7.71 |
| ESYT2              | 8.26 | 8.91 | 7.55 |
| FGF2               | 8.25 | 8.82 | 7.78 |
| PJA2               | 8.25 | 8.69 | 7.43 |
| RNA5SP428          | 8.25 | 8.48 | 8.00 |
| CD164              | 8.25 | 8.57 | 7.79 |
| IFITM1             | 8.25 | 8.98 | 7.48 |
| TRPS1              | 8.24 | 9.01 | 7.22 |
| UAP1               | 8.24 | 8.84 | 7.47 |
| HNRNPK             | 8.24 | 8.52 | 7.72 |
| CANX               | 8.24 | 8.60 | 7.81 |
| IL6ST              | 8.24 | 8.46 | 7.88 |
| LUST               | 8.24 | 8.55 | 7.88 |
| TGFBR2             | 8.23 | 8.66 | 7.62 |
| ARL3               | 8.23 | 8.66 | 7.76 |
| RNA5SP312          | 8.22 | 8.56 | 7.69 |
| RNA5SP311          | 8.21 | 8.59 | 7.71 |
| DMTF1              | 8.21 | 8.74 | 7.82 |
| TAX1BP1            | 8.21 | 8.43 | 7.49 |
| COL6A1             | 8.20 | 9.15 | 6.72 |
| TUG1               | 8.20 | 8.52 | 7.77 |
| BOLA2              | 8.20 | 8.65 | 7.89 |
| RBM39              | 8.20 | 8.50 | 7.64 |
| RPL10A             | 8.20 | 8.31 | 8.06 |
| MIR1238            | 8.20 | 8.87 | 7.85 |
| SMA4               | 8.20 | 8.62 | 7.82 |
| VCAN-AS1           | 8.19 | 9.13 | 6.93 |
| LOC100216479       | 8.19 | 9.12 | 7.52 |
| ANXA7              | 8.19 | 8.44 | 7.85 |
| PRRC2C             | 8.19 | 8.56 | 7.55 |
| BHLHE40            | 8.19 | 9.18 | 7.34 |
| UTRN               | 8.19 | 8.69 | 7.47 |
| RN7SK              | 8.18 | 8.86 | 7.74 |
| LUZP6              | 8.18 | 8.64 | 7.51 |
| TUBB4B             | 8.18 | 8.35 | 7.97 |
| LOC729737          | 8.18 | 8.55 | 7.69 |
| OTTHUMG00000165313 | 8.18 | 9.13 | 7.39 |



|                     |      |      |      |
|---------------------|------|------|------|
| <i>RNA5SP310</i>    | 8.18 | 8.57 | 7.83 |
| <i>PSMA7</i>        | 8.18 | 8.59 | 7.69 |
| <i>OGT</i>          | 8.17 | 8.50 | 7.70 |
| <i>ARCN1</i>        | 8.17 | 8.76 | 7.44 |
| <i>UQCRHL</i>       | 8.17 | 8.56 | 7.42 |
| <i>MIR3689F</i>     | 8.17 | 8.73 | 7.54 |
| <i>IGLJ7</i>        | 8.17 | 8.90 | 7.69 |
| <i>CIRBP</i>        | 8.16 | 8.62 | 7.45 |
| <i>CHMP4B</i>       | 8.16 | 8.56 | 7.59 |
| <i>PIGT</i>         | 8.16 | 8.69 | 7.40 |
| <i>SERINC1</i>      | 8.16 | 8.67 | 7.36 |
| <i>CDON</i>         | 8.16 | 8.98 | 6.58 |
| <i>SPDYE8P</i>      | 8.15 | 8.85 | 7.77 |
| <i>ATP5G3</i>       | 8.15 | 8.57 | 7.69 |
| <i>ABI1</i>         | 8.15 | 8.69 | 7.34 |
| <i>BCAT1</i>        | 8.15 | 8.88 | 7.48 |
| <i>ARL6IP1</i>      | 8.15 | 8.69 | 7.47 |
| <i>MIR4732</i>      | 8.14 | 8.52 | 7.81 |
| <i>USO1</i>         | 8.14 | 8.50 | 7.74 |
| <i>CDC42</i>        | 8.14 | 8.47 | 7.63 |
| <i>RGPD8</i>        | 8.14 | 8.34 | 7.88 |
| <i>H3F3B</i>        | 8.14 | 8.57 | 7.52 |
| <i>AGAP9</i>        | 8.14 | 8.37 | 7.81 |
| <i>PNISR</i>        | 8.13 | 8.44 | 7.82 |
| <i>YIPF5</i>        | 8.13 | 8.73 | 7.38 |
| <i>COX8A</i>        | 8.13 | 8.59 | 7.31 |
| <i>GABARAPL2</i>    | 8.13 | 8.50 | 7.61 |
| <i>COL1A1</i>       | 8.13 | 9.32 | 6.02 |
| <i>UBE2K</i>        | 8.13 | 8.61 | 7.52 |
| <i>ECH1</i>         | 8.12 | 8.58 | 7.65 |
| <i>ZC3H11A</i>      | 8.12 | 8.61 | 7.51 |
| <i>NDUFS5</i>       | 8.12 | 8.62 | 7.54 |
| <i>TYROBP</i>       | 8.11 | 9.48 | 6.89 |
| <i>CHCHD2</i>       | 8.11 | 8.32 | 7.60 |
| <i>AKT3</i>         | 8.11 | 8.57 | 7.69 |
| <i>PBX1</i>         | 8.11 | 8.62 | 7.65 |
| <i>NBPF8</i>        | 8.11 | 8.46 | 7.75 |
| <i>WWP2</i>         | 8.11 | 8.71 | 7.24 |
| <i>HNRNPM</i>       | 8.10 | 8.34 | 7.77 |
| <i>RPN2</i>         | 8.10 | 8.38 | 7.54 |
| <i>CAP1</i>         | 8.10 | 8.84 | 7.32 |
| <i>SFT2D2</i>       | 8.10 | 8.52 | 7.42 |
| <i>LOC100499405</i> | 8.10 | 8.30 | 7.66 |
| <i>METR1</i>        | 8.09 | 8.63 | 7.42 |
| <i>TAF1D</i>        | 8.09 | 8.56 | 7.57 |
| <i>C1orf43</i>      | 8.09 | 8.71 | 7.30 |
| <i>FBXO9</i>        | 8.08 | 8.65 | 7.48 |
| <i>GOLGA8B</i>      | 8.08 | 8.67 | 7.39 |
| <i>NRN1</i>         | 8.07 | 8.76 | 7.55 |

|                    |      |       |      |
|--------------------|------|-------|------|
| LMAN1              | 8.07 | 9.06  | 7.09 |
| EMC7               | 8.07 | 8.73  | 7.46 |
| CMPK1              | 8.07 | 8.32  | 7.83 |
| VCAN               | 8.07 | 9.07  | 6.69 |
| PICALM             | 8.07 | 8.43  | 7.51 |
| TOMM6              | 8.06 | 8.32  | 7.71 |
| SLC14A1            | 8.06 | 9.16  | 5.46 |
| OTTHUMG00000169696 | 8.06 | 8.49  | 7.58 |
| IGFBP5             | 8.06 | 8.76  | 6.64 |
| OSMR               | 8.06 | 8.61  | 6.78 |
| RGPD6              | 8.06 | 8.28  | 7.84 |
| SRRM1              | 8.05 | 8.30  | 7.72 |
| GLG1               | 8.05 | 8.47  | 7.38 |
| MIR3689D2          | 8.05 | 9.23  | 7.43 |
| SNORD17            | 8.05 | 9.09  | 6.86 |
| SLAIN2             | 8.04 | 8.58  | 7.59 |
| NPTN               | 8.04 | 8.49  | 7.36 |
| OTTHUMG00000169357 | 8.04 | 10.36 | 5.51 |
| PNRC1              | 8.03 | 8.41  | 7.70 |
| ATF4               | 8.03 | 8.34  | 7.66 |
| IFI30              | 8.03 | 10.20 | 6.14 |
| SFPQ               | 8.03 | 8.26  | 7.61 |
| SPTBN1             | 8.02 | 8.50  | 7.03 |
| DPCR1              | 8.02 | 8.67  | 7.29 |
| PSMA3              | 8.02 | 8.33  | 7.61 |
| GNG5P2             | 8.01 | 8.59  | 7.21 |
| NUCKS1             | 8.01 | 8.21  | 7.72 |
| IFI16              | 8.01 | 8.50  | 7.59 |
| MT1H               | 8.00 | 10.58 | 6.36 |
| LSM14A             | 8.00 | 8.37  | 7.52 |
| LOC101060147       | 8.00 | 8.28  | 7.64 |
| LOC101060211       | 8.00 | 8.44  | 7.79 |
| FXVD5              | 7.99 | 8.47  | 7.45 |
| MIR21              | 7.99 | 9.22  | 6.78 |
| MTPN               | 7.99 | 8.66  | 6.82 |
| COLEC12            | 7.99 | 8.81  | 7.10 |
| LTBP1              | 7.99 | 9.31  | 6.57 |
| MTDH               | 7.99 | 8.47  | 7.50 |
| SNORA24            | 7.99 | 8.56  | 7.59 |
| EID1               | 7.98 | 8.15  | 7.75 |
| BASP1              | 7.98 | 9.45  | 5.97 |
| KHDC1              | 7.98 | 8.49  | 7.46 |
| C19orf53           | 7.98 | 8.57  | 7.37 |
| TAF15              | 7.98 | 8.29  | 7.59 |
| DLX5               | 7.98 | 8.63  | 6.86 |
| PTPN11             | 7.97 | 8.61  | 7.35 |
| MIR520F            | 7.97 | 8.78  | 7.18 |
| PCOLCE             | 7.97 | 8.29  | 7.38 |
| EFCAB14            | 7.97 | 8.18  | 7.57 |

|              |      |      |      |
|--------------|------|------|------|
| SNAR-B1      | 7.97 | 8.61 | 7.35 |
| EIF3A        | 7.97 | 8.63 | 7.22 |
| CASC4        | 7.96 | 8.28 | 7.52 |
| ATP5A1       | 7.96 | 8.23 | 7.65 |
| SUPT4H1      | 7.96 | 8.38 | 7.64 |
| DDR2         | 7.96 | 8.63 | 7.42 |
| PKD1P1       | 7.96 | 8.25 | 7.59 |
| S100B        | 7.96 | 9.00 | 5.23 |
| OMD          | 7.95 | 8.66 | 6.38 |
| SRRM2        | 7.95 | 8.15 | 7.53 |
| FNDC3B       | 7.95 | 8.53 | 7.27 |
| CLTC         | 7.95 | 8.47 | 7.38 |
| SGCB         | 7.95 | 8.75 | 6.80 |
| EIF4EBP2     | 7.95 | 8.36 | 7.04 |
| F8A3         | 7.95 | 8.28 | 7.53 |
| MIR1184-1    | 7.95 | 8.28 | 7.53 |
| PDGFRA       | 7.94 | 8.68 | 6.80 |
| PSMB4        | 7.94 | 8.24 | 7.30 |
| PTPRM        | 7.94 | 8.37 | 7.22 |
| SCARNA10     | 7.94 | 8.42 | 7.26 |
| ATP2B4       | 7.94 | 8.46 | 7.23 |
| KRTAP5-7     | 7.93 | 8.20 | 7.69 |
| ROMO1        | 7.93 | 8.18 | 7.47 |
| MGEA5        | 7.93 | 8.30 | 7.28 |
| HNRNPC       | 7.93 | 8.15 | 7.26 |
| BMS1P5       | 7.93 | 8.24 | 7.40 |
| CAMSAP2      | 7.93 | 8.31 | 7.63 |
| HIGD1A       | 7.93 | 8.49 | 7.22 |
| GINM1        | 7.93 | 8.41 | 7.11 |
| LGMN         | 7.93 | 9.29 | 7.04 |
| EPB41L2      | 7.92 | 8.51 | 6.95 |
| EIF3C        | 7.92 | 8.36 | 7.30 |
| AFF4         | 7.92 | 8.45 | 7.28 |
| SMARCA5      | 7.92 | 8.23 | 7.60 |
| USP17L15     | 7.92 | 8.83 | 7.27 |
| CYBB         | 7.92 | 9.56 | 6.15 |
| USP53        | 7.92 | 8.57 | 7.24 |
| YME1L1       | 7.92 | 8.22 | 7.43 |
| FBL          | 7.91 | 8.30 | 7.43 |
| UNC50        | 7.91 | 8.22 | 7.39 |
| CYBRD1       | 7.91 | 8.20 | 7.25 |
| MIR4737      | 7.91 | 8.23 | 7.23 |
| DEFB109P1    | 7.90 | 8.36 | 7.63 |
| GOLGA80      | 7.89 | 8.31 | 7.40 |
| LOC100129148 | 7.89 | 8.06 | 7.67 |
| BNIP3        | 7.89 | 8.52 | 7.31 |
| MIR1976      | 7.89 | 8.42 | 7.35 |
| TMF1         | 7.89 | 8.27 | 7.34 |
| CHD9         | 7.89 | 8.25 | 7.30 |

|                    |      |      |      |
|--------------------|------|------|------|
| SRSF4              | 7.89 | 8.27 | 7.31 |
| ARL6IP4            | 7.88 | 8.19 | 7.73 |
| GPNUMB             | 7.88 | 8.68 | 6.69 |
| ALG12              | 7.88 | 8.47 | 7.37 |
| MIR3180-1          | 7.88 | 8.58 | 7.37 |
| MST4               | 7.88 | 9.23 | 6.16 |
| PCNP               | 7.88 | 8.25 | 7.02 |
| OTTHUMG00000019295 | 7.87 | 8.70 | 6.97 |
| CCDC14             | 7.87 | 8.15 | 7.46 |
| AHNAK              | 7.87 | 8.31 | 7.12 |
| MAGED1             | 7.87 | 8.25 | 6.87 |
| ITGAV              | 7.87 | 8.53 | 7.09 |
| H1FO               | 7.86 | 8.21 | 7.24 |
| LPTM5              | 7.86 | 9.38 | 6.48 |
| SCARB2             | 7.86 | 8.60 | 6.71 |
| C6orf62            | 7.85 | 8.52 | 7.00 |
| SESTD1             | 7.85 | 8.48 | 7.28 |
| RAPH1              | 7.85 | 8.16 | 7.40 |
| BMS1P1             | 7.85 | 8.13 | 7.41 |
| YWHAQ              | 7.85 | 8.25 | 7.30 |
| KMT2E              | 7.85 | 8.12 | 7.32 |
| NDUFAB1            | 7.85 | 8.31 | 7.45 |
| MIR3619            | 7.84 | 8.38 | 7.53 |
| PCBP2              | 7.84 | 8.12 | 7.31 |
| FBN1               | 7.84 | 8.87 | 6.73 |
| AGAP4              | 7.84 | 8.02 | 7.59 |
| MAR6               | 7.84 | 8.17 | 7.33 |
| LOC101060615       | 7.84 | 9.30 | 7.22 |
| SON                | 7.84 | 8.03 | 7.44 |
| HIST1H1C           | 7.84 | 8.73 | 6.48 |
| COX20              | 7.83 | 8.10 | 7.51 |
| FUBP1              | 7.83 | 8.02 | 7.49 |
| PAR5               | 7.83 | 8.27 | 7.28 |
| ROCK1              | 7.83 | 8.48 | 6.70 |
| REEP3              | 7.83 | 8.24 | 7.21 |
| UQCR10             | 7.82 | 8.09 | 7.47 |
| SERPINF1           | 7.82 | 8.48 | 7.10 |
| AGAP7              | 7.82 | 8.15 | 7.46 |
| DUX4L3             | 7.82 | 8.58 | 7.18 |
| MGC72080           | 7.81 | 8.23 | 7.51 |
| EIF2S2             | 7.81 | 8.23 | 7.28 |
| ARGLU1             | 7.81 | 8.06 | 7.49 |
| GLIPR1             | 7.81 | 8.50 | 6.96 |
| CAPRIN1            | 7.81 | 8.18 | 7.13 |
| SLC39A6            | 7.80 | 8.47 | 6.72 |
| THBS1              | 7.80 | 8.77 | 7.03 |
| TTC3P1             | 7.80 | 8.25 | 7.33 |
| SEC24B             | 7.80 | 8.16 | 7.29 |
| CREBBP             | 7.80 | 8.25 | 7.15 |

|                    |      |      |      |
|--------------------|------|------|------|
| DUX2               | 7.80 | 8.47 | 7.24 |
| SNORD113-3         | 7.80 | 9.23 | 6.57 |
| KCNRG              | 7.80 | 8.51 | 6.78 |
| CNBP               | 7.80 | 8.12 | 7.25 |
| RPL23AP32          | 7.79 | 8.49 | 7.39 |
| PRPF8              | 7.79 | 8.15 | 7.18 |
| GLI3               | 7.79 | 8.48 | 7.01 |
| EIF4A2             | 7.78 | 8.07 | 7.38 |
| GOLIM4             | 7.78 | 8.06 | 7.09 |
| MIR1910            | 7.78 | 8.21 | 7.56 |
| LAMC1              | 7.78 | 8.52 | 6.64 |
| AGAP8              | 7.78 | 8.02 | 7.59 |
| RNU4-5P            | 7.78 | 8.38 | 6.77 |
| LOC100996554       | 7.77 | 8.17 | 7.23 |
| SLC29A1            | 7.77 | 8.25 | 7.16 |
| NAIP               | 7.77 | 8.12 | 7.41 |
| SMOC2              | 7.77 | 9.52 | 6.41 |
| MIR647             | 7.77 | 8.71 | 7.19 |
| LOC100129060       | 7.77 | 8.03 | 7.47 |
| STAT3              | 7.77 | 8.27 | 7.27 |
| COPA               | 7.77 | 8.24 | 7.06 |
| SRP14              | 7.77 | 8.01 | 7.44 |
| ARL2BP             | 7.77 | 8.47 | 6.68 |
| COL11A1            | 7.76 | 8.60 | 7.07 |
| MIR4669            | 7.76 | 8.46 | 7.11 |
| EMP2               | 7.76 | 8.13 | 7.37 |
| STX7               | 7.76 | 8.15 | 7.25 |
| PFN1               | 7.76 | 8.14 | 7.33 |
| GOLGA6L5           | 7.75 | 8.17 | 7.38 |
| ZNF532             | 7.75 | 8.43 | 7.24 |
| USP17L9P           | 7.75 | 8.69 | 7.15 |
| HIF1A-AS2          | 7.75 | 8.54 | 6.83 |
| LOC648987          | 7.75 | 7.96 | 7.45 |
| SERBP1             | 7.75 | 7.89 | 7.54 |
| CTSA               | 7.75 | 8.33 | 7.07 |
| RARS               | 7.75 | 8.25 | 7.22 |
| PTN                | 7.75 | 9.69 | 5.86 |
| ARHGEF12           | 7.74 | 8.08 | 7.12 |
| EIF3L              | 7.74 | 7.99 | 7.44 |
| OTTHUMG00000168327 | 7.74 | 8.24 | 6.94 |
| LIN7C              | 7.74 | 8.23 | 7.15 |
| CTNNB1             | 7.73 | 8.30 | 7.05 |
| ACBD3              | 7.73 | 8.20 | 7.34 |
| PPP3CA             | 7.73 | 8.19 | 7.29 |
| SNORD116-17        | 7.73 | 8.15 | 7.23 |
| FNBP4              | 7.73 | 8.09 | 7.02 |
| GPC6               | 7.72 | 8.66 | 6.79 |
| USP17L6P           | 7.72 | 8.73 | 7.11 |
| PCM1               | 7.72 | 8.03 | 7.24 |

|              |      |      |      |
|--------------|------|------|------|
| RHOB         | 7.72 | 7.99 | 7.22 |
| SEC61B       | 7.71 | 8.13 | 7.03 |
| RNF168       | 7.71 | 8.04 | 7.14 |
| FAM114A1     | 7.71 | 8.41 | 6.84 |
| RAD23B       | 7.71 | 8.18 | 7.21 |
| SYNCRIP      | 7.70 | 8.17 | 7.08 |
| SLC40A1      | 7.70 | 8.05 | 7.22 |
| RPN1         | 7.70 | 8.20 | 7.06 |
| MIR548I2     | 7.70 | 8.80 | 7.08 |
| TMEM14A      | 7.70 | 8.24 | 6.87 |
| BHLHE41      | 7.69 | 8.14 | 6.84 |
| CCNI         | 7.69 | 8.07 | 7.16 |
| PTGES3       | 7.69 | 8.08 | 7.03 |
| SDHAP2       | 7.69 | 8.24 | 7.18 |
| HLA-E        | 7.69 | 8.08 | 7.08 |
| PSMB1        | 7.69 | 8.12 | 7.09 |
| C19orf43     | 7.68 | 8.29 | 6.90 |
| SH3GLB1      | 7.68 | 8.28 | 7.18 |
| PDCD4        | 7.68 | 8.07 | 7.09 |
| HSPD1        | 7.68 | 7.94 | 7.32 |
| LRRC37A2     | 7.67 | 8.23 | 7.16 |
| MIR185       | 7.67 | 8.25 | 7.22 |
| RRAGA        | 7.67 | 8.03 | 7.02 |
| PEBP1        | 7.67 | 8.10 | 7.23 |
| HDLBP        | 7.67 | 8.03 | 7.10 |
| PLAGL1       | 7.67 | 8.27 | 7.20 |
| ATP5J2       | 7.67 | 8.10 | 7.23 |
| MT1G         | 7.67 | 9.66 | 6.40 |
| MYOF         | 7.66 | 8.46 | 6.27 |
| WDFY3-AS1    | 7.66 | 7.91 | 7.09 |
| ZCRB1        | 7.66 | 7.93 | 7.02 |
| HEXA         | 7.66 | 8.10 | 7.13 |
| TM9SF3       | 7.65 | 8.06 | 7.09 |
| CD109        | 7.65 | 8.75 | 6.35 |
| DCTN6        | 7.65 | 7.99 | 7.14 |
| LOC100996920 | 7.65 | 8.22 | 6.94 |
| MIR574       | 7.65 | 8.06 | 7.17 |
| BMPR2        | 7.64 | 8.10 | 7.05 |
| NTN4         | 7.64 | 8.10 | 6.71 |
| RAB6A        | 7.64 | 8.20 | 6.95 |
| SMA5         | 7.64 | 8.11 | 7.26 |
| VMP1         | 7.64 | 8.18 | 6.89 |
| CD74         | 7.64 | 8.49 | 7.02 |
| NDUFB1       | 7.64 | 7.87 | 7.33 |
| TMEM47       | 7.64 | 8.32 | 6.42 |
| SNAR-C1      | 7.63 | 8.43 | 6.99 |
| CLINT1       | 7.63 | 8.12 | 6.89 |
| POLR2L       | 7.63 | 8.04 | 6.94 |
| COL6A2       | 7.63 | 8.38 | 6.71 |

|                    |      |      |      |
|--------------------|------|------|------|
| OTTHUMG00000160932 | 7.63 | 8.41 | 6.65 |
| HBA1               | 7.63 | 9.54 | 6.03 |
| GDI2               | 7.63 | 8.13 | 6.89 |
| MGC2752            | 7.62 | 8.16 | 7.20 |
| IQSEC3             | 7.62 | 8.06 | 7.14 |
| LENG9              | 7.62 | 7.88 | 7.26 |
| USP17L5            | 7.62 | 8.92 | 6.88 |
| NKTR               | 7.61 | 7.89 | 6.98 |
| RASA4              | 7.61 | 8.02 | 7.31 |
| UQCRC2             | 7.61 | 7.87 | 7.12 |
| SHC1               | 7.61 | 8.15 | 6.86 |
| JAK1               | 7.61 | 7.85 | 7.14 |
| UBXN4              | 7.61 | 7.92 | 7.27 |
| SEC63              | 7.60 | 7.91 | 7.03 |
| OTTHUMG00000151089 | 7.60 | 7.93 | 6.89 |
| MAP3K8             | 7.60 | 8.10 | 7.18 |
| RGCC               | 7.60 | 8.23 | 6.92 |
| GOLPH3             | 7.59 | 7.92 | 7.31 |
| REEP5              | 7.59 | 7.87 | 7.07 |
| MSMP               | 7.59 | 9.95 | 5.79 |
| NOTCH2             | 7.59 | 8.17 | 7.00 |
| TRAM2              | 7.59 | 8.30 | 6.50 |
| HSPA9              | 7.59 | 7.92 | 6.90 |
| VCAM1              | 7.58 | 8.29 | 6.42 |
| MYADM              | 7.58 | 8.28 | 6.47 |
| MYO1B              | 7.58 | 8.18 | 6.63 |
| SAT1               | 7.58 | 7.92 | 7.27 |
| RPS6               | 7.58 | 7.69 | 7.38 |
| COL14A1            | 7.58 | 8.54 | 6.31 |
| EIF3E              | 7.58 | 7.94 | 7.19 |
| DDX1               | 7.58 | 8.01 | 6.62 |
| RGPD2              | 7.57 | 7.90 | 7.29 |
| HERC2P3            | 7.57 | 7.78 | 7.20 |
| TCF4               | 7.57 | 8.18 | 6.98 |
| PIK3R1             | 7.57 | 8.12 | 6.85 |
| U2SURP             | 7.57 | 7.84 | 6.95 |
| RBP4               | 7.56 | 8.61 | 6.09 |
| CD248              | 7.56 | 8.25 | 6.93 |
| ZNF207             | 7.56 | 7.81 | 7.17 |
| ARF4               | 7.56 | 8.41 | 6.90 |
| MIR1254-1          | 7.56 | 8.02 | 7.10 |
| SAR1A              | 7.55 | 8.20 | 6.97 |
| PIK3C3             | 7.55 | 7.96 | 7.11 |
| ZNF358             | 7.55 | 7.91 | 6.93 |
| ELF1               | 7.55 | 8.14 | 6.48 |
| CSNK1E             | 7.55 | 7.82 | 7.15 |
| PSD3               | 7.55 | 8.16 | 6.96 |
| HIPK3              | 7.54 | 7.92 | 6.95 |
| MRPL33             | 7.54 | 7.72 | 6.86 |

|                    |      |      |      |
|--------------------|------|------|------|
| CHRD12             | 7.54 | 9.55 | 5.71 |
| ACTR3BP5           | 7.54 | 8.57 | 6.98 |
| MIR1538            | 7.54 | 8.05 | 7.02 |
| CD9                | 7.54 | 7.84 | 7.15 |
| ZNF841             | 7.53 | 7.97 | 7.04 |
| PLAC9              | 7.53 | 7.99 | 6.86 |
| TTC14              | 7.53 | 7.75 | 7.21 |
| FOXC1              | 7.53 | 7.97 | 7.06 |
| C5orf15            | 7.53 | 7.88 | 6.69 |
| NFE2L1             | 7.53 | 7.97 | 6.95 |
| FAM21A             | 7.53 | 7.71 | 7.25 |
| ZFP36              | 7.52 | 8.13 | 6.87 |
| SELT               | 7.52 | 7.85 | 7.10 |
| ILF2               | 7.52 | 8.18 | 6.96 |
| OTTHUMG00000157333 | 7.52 | 7.98 | 7.11 |
| TSPAN2             | 7.51 | 8.93 | 5.31 |
| RAB22A             | 7.51 | 8.39 | 6.46 |
| PSMB6              | 7.51 | 7.98 | 7.14 |
| TNFRSF11B          | 7.51 | 8.48 | 6.42 |
| SRSF6              | 7.51 | 7.99 | 7.06 |
| ARL17A             | 7.51 | 8.19 | 6.85 |
| PGK1               | 7.51 | 8.35 | 6.75 |
| SMARCA1            | 7.51 | 7.85 | 6.90 |
| DDX6               | 7.51 | 7.96 | 6.95 |
| MXRA8              | 7.51 | 8.23 | 6.46 |
| GNL3               | 7.51 | 7.98 | 7.01 |
| NENF               | 7.50 | 7.86 | 6.68 |
| SRP72              | 7.50 | 8.19 | 6.76 |
| CHMP5              | 7.50 | 7.79 | 6.84 |
| GRN                | 7.50 | 8.25 | 6.77 |
| CLK1               | 7.50 | 7.75 | 7.07 |
| CD63               | 7.50 | 7.72 | 7.31 |
| PALMD              | 7.50 | 7.94 | 6.90 |
| VAMP3              | 7.50 | 7.95 | 6.96 |
| TPR                | 7.50 | 7.78 | 6.99 |
| PDCD5              | 7.50 | 7.83 | 7.12 |
| NDFIP1             | 7.50 | 7.84 | 6.92 |
| NARS               | 7.50 | 8.00 | 6.62 |
| HIST2H2AA4         | 7.49 | 7.81 | 6.65 |
| SLC20A1            | 7.49 | 8.09 | 6.13 |
| RNA5SP65           | 7.49 | 8.24 | 6.98 |
| N4BP2L2            | 7.49 | 7.72 | 7.25 |
| SNRNP70            | 7.49 | 7.74 | 6.90 |
| NUDT21             | 7.49 | 7.75 | 7.00 |
| ITIH6              | 7.49 | 8.75 | 5.50 |
| SNHG5              | 7.49 | 8.02 | 7.00 |
| SOX5               | 7.49 | 7.96 | 7.11 |
| GREM1              | 7.49 | 9.22 | 5.26 |
| GTF2A1             | 7.49 | 7.97 | 6.77 |



|                    |      |      |      |
|--------------------|------|------|------|
| CRTAP              | 7.48 | 7.90 | 7.09 |
| CTSD               | 7.48 | 8.08 | 6.88 |
| COL5A2             | 7.48 | 8.34 | 6.06 |
| SPRED1             | 7.48 | 7.90 | 6.59 |
| MDM4               | 7.48 | 7.69 | 7.05 |
| C19orf60           | 7.48 | 8.01 | 6.99 |
| GNG12              | 7.48 | 7.91 | 6.55 |
| DIS3               | 7.48 | 7.78 | 6.77 |
| HIST1H2BK          | 7.48 | 7.93 | 6.92 |
| NDEL1              | 7.48 | 8.00 | 6.74 |
| MIR570             | 7.47 | 8.10 | 6.71 |
| DEFB109P1B         | 7.47 | 8.00 | 7.13 |
| OTTHUMG00000090442 | 7.47 | 7.88 | 7.07 |
| CCDC6              | 7.47 | 8.04 | 6.88 |
| CNOT1              | 7.47 | 7.82 | 6.89 |
| SULF1              | 7.46 | 8.15 | 6.35 |
| TRAPPC2L           | 7.46 | 8.06 | 6.61 |
| ACTR3              | 7.46 | 8.30 | 6.14 |
| HLA-DQA1           | 7.46 | 9.09 | 6.16 |
| TIMP4              | 7.46 | 8.77 | 6.96 |
| SMC5               | 7.46 | 8.00 | 6.69 |
| NNMT               | 7.46 | 8.09 | 6.61 |
| LYZ                | 7.46 | 9.94 | 5.19 |
| PMS2L2             | 7.46 | 7.69 | 7.16 |
| PMS2P5             | 7.46 | 7.69 | 7.16 |
| POM121             | 7.45 | 7.84 | 6.95 |
| SAFB2              | 7.45 | 7.66 | 7.08 |
| AP2B1              | 7.45 | 8.10 | 6.86 |
| DHX15              | 7.45 | 7.82 | 7.02 |
| TMEM50A            | 7.45 | 7.93 | 6.58 |
| CDH11              | 7.45 | 8.40 | 5.98 |
| KRTAP10-6          | 7.45 | 8.33 | 6.88 |
| DAB2               | 7.45 | 8.00 | 6.63 |
| PSMB3              | 7.45 | 8.03 | 6.71 |
| GOLGA6L4           | 7.44 | 7.71 | 7.20 |
| SNORD116-2         | 7.44 | 8.04 | 7.04 |
| SEC24D             | 7.44 | 7.95 | 6.73 |
| ARRDC3             | 7.44 | 8.66 | 6.29 |
| RBMS1              | 7.44 | 7.83 | 6.88 |
| SNORD13P2          | 7.44 | 8.01 | 6.90 |
| PLOD1              | 7.44 | 8.28 | 6.81 |
| PPDPF              | 7.44 | 7.93 | 6.86 |
| MLEC               | 7.44 | 7.76 | 7.05 |
| LOC400682          | 7.44 | 7.69 | 7.22 |
| C1orf54            | 7.44 | 8.55 | 6.75 |
| MAP7D3             | 7.43 | 7.73 | 6.87 |
| DNAJC3             | 7.43 | 8.02 | 7.07 |
| LOC399753          | 7.43 | 7.62 | 7.11 |
| YWHAZ              | 7.43 | 7.96 | 6.53 |

|                    |      |      |      |
|--------------------|------|------|------|
| ZNF638             | 7.43 | 7.70 | 7.20 |
| PCBP1              | 7.43 | 7.74 | 7.08 |
| COX5A              | 7.43 | 7.95 | 6.93 |
| HNRNPUL1           | 7.43 | 7.89 | 6.69 |
| MIR644A            | 7.43 | 7.76 | 6.20 |
| NCL                | 7.43 | 7.54 | 7.13 |
| MEA1               | 7.42 | 7.84 | 6.76 |
| GPR64              | 7.42 | 8.14 | 6.59 |
| CTBS               | 7.42 | 7.84 | 7.02 |
| CDC37              | 7.42 | 7.65 | 6.83 |
| PDCL3P4            | 7.41 | 8.03 | 6.97 |
| OXA1L              | 7.41 | 7.65 | 6.93 |
| DUSP23             | 7.41 | 7.75 | 7.06 |
| VAPA               | 7.41 | 8.14 | 6.86 |
| PAFAH1B1           | 7.41 | 7.92 | 6.60 |
| EIF3D              | 7.41 | 7.67 | 6.75 |
| NFIB               | 7.41 | 7.87 | 6.67 |
| HUWE1              | 7.41 | 7.74 | 6.87 |
| PTBP3              | 7.41 | 7.84 | 6.86 |
| WNK1               | 7.41 | 7.82 | 7.06 |
| FBXO11             | 7.41 | 7.76 | 6.91 |
| CYB5R3             | 7.40 | 7.82 | 6.83 |
| SNORD69            | 7.40 | 7.74 | 7.00 |
| TACC1              | 7.40 | 7.79 | 6.76 |
| CLEC3B             | 7.40 | 7.96 | 5.90 |
| ZC3H13             | 7.40 | 7.70 | 6.89 |
| RARS2              | 7.40 | 7.90 | 6.60 |
| ILK                | 7.40 | 7.80 | 6.49 |
| SCARNA17           | 7.40 | 8.03 | 6.74 |
| ITGB8              | 7.40 | 8.13 | 5.32 |
| CCDC88A            | 7.40 | 7.73 | 6.67 |
| NRD1               | 7.40 | 7.65 | 6.91 |
| CAV1               | 7.40 | 7.88 | 6.65 |
| SNORD116-6         | 7.39 | 7.94 | 6.72 |
| LOC100996709       | 7.39 | 8.06 | 6.96 |
| CBWD5              | 7.39 | 7.73 | 7.11 |
| DEK                | 7.39 | 7.80 | 6.82 |
| MFAP1              | 7.39 | 7.79 | 6.96 |
| LENG8              | 7.39 | 7.75 | 6.98 |
| RAC1               | 7.39 | 7.64 | 7.02 |
| OTTHUMG00000156089 | 7.39 | 8.24 | 6.64 |
| LRLE1              | 7.38 | 7.77 | 6.98 |
| SLC44A2            | 7.38 | 8.03 | 6.23 |
| RASA4B             | 7.38 | 8.45 | 6.73 |
| MIR4533            | 7.38 | 8.14 | 7.10 |
| SCAMP1             | 7.38 | 8.16 | 6.64 |
| IGHJ1              | 7.38 | 7.94 | 7.08 |
| GMFG               | 7.38 | 8.08 | 6.58 |
| GFPT1              | 7.38 | 7.97 | 6.90 |

|              |      |      |      |
|--------------|------|------|------|
| ASS1         | 7.38 | 7.96 | 6.96 |
| MBNL2        | 7.38 | 7.89 | 6.56 |
| CXCR7        | 7.37 | 8.00 | 6.38 |
| CASC3        | 7.37 | 7.80 | 6.31 |
| AFF1         | 7.37 | 7.82 | 6.86 |
| HCG8         | 7.37 | 8.24 | 6.61 |
| AK2          | 7.37 | 7.62 | 7.19 |
| KRTAP9-2     | 7.37 | 7.90 | 6.88 |
| GLTSCR2      | 7.37 | 7.78 | 6.83 |
| C1orf123     | 7.37 | 7.67 | 6.86 |
| EP300        | 7.37 | 7.82 | 6.65 |
| HDDC2        | 7.37 | 7.65 | 6.83 |
| PYURF        | 7.37 | 7.61 | 6.96 |
| USP34        | 7.37 | 7.72 | 6.76 |
| ITM2A        | 7.37 | 8.44 | 5.20 |
| ISM1         | 7.37 | 8.60 | 6.52 |
| C14orf1      | 7.36 | 7.83 | 6.80 |
| HIST1H1E     | 7.36 | 7.90 | 6.32 |
| IFI6         | 7.36 | 8.09 | 6.72 |
| HTRA4        | 7.36 | 8.49 | 6.09 |
| GOLGA6L10    | 7.36 | 7.47 | 7.25 |
| KDELR1       | 7.36 | 7.93 | 6.67 |
| MEOX2        | 7.36 | 8.45 | 6.02 |
| MIR1280      | 7.36 | 7.87 | 6.73 |
| NRP1         | 7.36 | 8.04 | 6.25 |
| MACF1        | 7.36 | 7.76 | 6.73 |
| LSMD1        | 7.36 | 7.72 | 7.00 |
| EGR1         | 7.36 | 8.07 | 6.61 |
| RPS18        | 7.36 | 7.51 | 7.09 |
| CBR4         | 7.35 | 7.73 | 6.87 |
| SLTM         | 7.35 | 7.65 | 6.56 |
| NFKBIZ       | 7.35 | 8.05 | 6.65 |
| RAMP2        | 7.35 | 8.50 | 6.18 |
| SYF2         | 7.35 | 7.75 | 6.75 |
| ULK4P2       | 7.35 | 7.68 | 6.48 |
| ANXA4        | 7.35 | 7.83 | 6.54 |
| ANKRD10      | 7.35 | 7.70 | 6.83 |
| KCTD12       | 7.35 | 7.92 | 6.75 |
| CTTN         | 7.35 | 7.76 | 6.71 |
| FAM21B       | 7.35 | 7.57 | 7.02 |
| LOC400927    | 7.34 | 8.05 | 6.57 |
| ANTXR1       | 7.34 | 8.66 | 5.53 |
| HLA-C        | 7.34 | 7.67 | 7.11 |
| TISP43       | 7.34 | 8.00 | 6.75 |
| LOC100506745 | 7.34 | 7.60 | 7.01 |
| PRRC1        | 7.34 | 8.00 | 6.60 |
| MAN1A1       | 7.34 | 7.94 | 6.52 |
| LOC100128364 | 7.34 | 8.09 | 6.66 |
| GADD45GIP1   | 7.34 | 7.84 | 7.05 |

|              |      |      |      |
|--------------|------|------|------|
| DDX3X        | 7.34 | 8.13 | 6.40 |
| PHF1         | 7.34 | 7.66 | 7.03 |
| SMC3         | 7.34 | 7.75 | 6.80 |
| HCG25        | 7.34 | 7.58 | 7.19 |
| LOC100508046 | 7.34 | 8.14 | 6.80 |
| AK1          | 7.34 | 7.89 | 6.53 |
| BZW1         | 7.33 | 7.85 | 6.80 |
| FNDC3A       | 7.33 | 7.76 | 6.65 |
| SETD5        | 7.33 | 7.60 | 7.03 |
| MAPRE2       | 7.33 | 7.85 | 6.45 |
| SLK          | 7.33 | 7.75 | 6.54 |
| SPPL2A       | 7.33 | 7.78 | 6.49 |
| MON2         | 7.33 | 7.81 | 7.01 |
| TYW1         | 7.33 | 7.67 | 6.91 |
| TWSG1        | 7.33 | 7.87 | 6.54 |
| CAPN2        | 7.33 | 7.97 | 6.43 |
| GHITM        | 7.33 | 7.77 | 7.01 |
| TFG          | 7.33 | 7.80 | 6.68 |
| ATF2         | 7.32 | 7.75 | 6.73 |
| PHF3         | 7.32 | 7.69 | 6.89 |
| NET1         | 7.32 | 7.93 | 6.55 |
| RRBP1        | 7.32 | 7.99 | 6.46 |
| CRIPAK       | 7.32 | 7.66 | 6.85 |
| PFDN2        | 7.32 | 8.12 | 6.50 |
| USP7         | 7.32 | 7.83 | 6.83 |
| LOC285074    | 7.32 | 7.61 | 6.62 |
| PPIC         | 7.32 | 7.63 | 6.13 |
| DNAJC15      | 7.32 | 7.85 | 6.51 |
| NUPR1        | 7.32 | 7.60 | 7.05 |
| KIFAP3       | 7.32 | 7.85 | 6.54 |
| SRI          | 7.31 | 7.54 | 6.86 |
| TERF2IP      | 7.31 | 7.65 | 6.97 |
| SCXA         | 7.31 | 9.42 | 5.78 |
| EIF3M        | 7.31 | 7.69 | 6.98 |
| PSMC2        | 7.31 | 7.85 | 6.65 |
| TXNDC15      | 7.31 | 7.59 | 6.82 |
| MARCKS       | 7.31 | 7.71 | 6.91 |
| KTN1         | 7.31 | 7.56 | 6.73 |
| TRA2B        | 7.30 | 7.77 | 6.55 |
| ANTXR2       | 7.30 | 7.79 | 6.73 |
| SNORD116-15  | 7.30 | 7.63 | 6.88 |
| GNB2L1       | 7.30 | 7.54 | 7.06 |
| MBOAT1       | 7.30 | 7.87 | 6.48 |
| TMOD3        | 7.30 | 7.72 | 6.86 |
| PSMD7        | 7.30 | 7.99 | 6.48 |
| WASH7P       | 7.30 | 7.70 | 7.14 |
| ATP50        | 7.30 | 7.53 | 7.06 |
| UQCR11       | 7.30 | 7.67 | 6.75 |
| PAM          | 7.29 | 7.68 | 6.53 |

|           |      |      |      |
|-----------|------|------|------|
| SKIL      | 7.29 | 7.77 | 6.55 |
| LOC220729 | 7.29 | 7.69 | 6.47 |
| DRG1      | 7.29 | 7.62 | 6.63 |
| BRD2      | 7.29 | 7.52 | 6.76 |
| PLTP      | 7.29 | 7.86 | 6.20 |
| RAN       | 7.29 | 7.73 | 6.93 |
| NFIC      | 7.29 | 7.86 | 6.64 |
| CSE1L     | 7.29 | 7.74 | 6.65 |
| KMT2C     | 7.29 | 7.57 | 6.70 |
| C1S       | 7.28 | 7.61 | 7.00 |
| CTSL1     | 7.28 | 7.97 | 6.54 |
| SNHG16    | 7.28 | 7.98 | 6.66 |
| BCL6      | 7.28 | 7.99 | 6.77 |
| GOLGB1    | 7.28 | 7.50 | 6.93 |
| ADAM10    | 7.28 | 7.74 | 6.71 |
| PDK1      | 7.28 | 8.03 | 6.16 |
| ACADM     | 7.28 | 7.70 | 6.52 |
| ARHGAP1   | 7.28 | 8.29 | 6.65 |
| TAF7      | 7.28 | 7.73 | 6.71 |
| REREP3    | 7.28 | 7.69 | 6.84 |
| IGKC      | 7.28 | 7.67 | 7.03 |
| HSD17B4   | 7.27 | 7.78 | 6.93 |
| RANBP9    | 7.27 | 7.89 | 6.48 |
| GUSBP3    | 7.27 | 7.69 | 7.01 |
| CCAR1     | 7.27 | 7.57 | 6.77 |
| IQSEC1    | 7.27 | 7.58 | 6.93 |
| LRRC15    | 7.27 | 9.22 | 5.06 |
| LAMA4     | 7.27 | 7.89 | 6.23 |
| KCNMA1    | 7.27 | 7.65 | 6.87 |
| MTRNR2L8  | 7.27 | 7.59 | 6.91 |
| CD59      | 7.27 | 7.56 | 6.76 |
| RBM5      | 7.27 | 7.61 | 6.65 |
| FUS       | 7.27 | 7.53 | 6.89 |
| MYCBP2    | 7.27 | 7.59 | 6.74 |
| MIR593    | 7.27 | 7.58 | 6.88 |
| AHR       | 7.26 | 7.96 | 6.68 |
| CSNK2B    | 7.26 | 7.39 | 7.13 |
| IGIP      | 7.26 | 7.71 | 6.66 |
| MEG3      | 7.26 | 8.39 | 6.48 |
| PRRX1     | 7.26 | 8.14 | 6.28 |
| IK        | 7.26 | 7.58 | 6.83 |
| MIR92B    | 7.26 | 7.84 | 6.91 |
| NIPBL     | 7.26 | 7.57 | 6.77 |
| EXOC1     | 7.26 | 7.65 | 6.64 |
| SPCS1     | 7.26 | 7.42 | 6.91 |
| TBX15     | 7.26 | 7.50 | 6.62 |
| LMBRD1    | 7.26 | 7.68 | 6.45 |
| MDM2      | 7.26 | 7.80 | 6.52 |
| IGFBP4    | 7.26 | 7.64 | 6.94 |

|              |      |      |      |
|--------------|------|------|------|
| MIR3689D1    | 7.26 | 8.01 | 6.53 |
| FCER1G       | 7.25 | 8.82 | 5.60 |
| TPM2         | 7.25 | 7.68 | 6.82 |
| ANKRD12      | 7.25 | 7.52 | 6.92 |
| GPBP1        | 7.25 | 7.60 | 6.86 |
| GGNBP2       | 7.25 | 7.56 | 6.78 |
| LOC100506562 | 7.25 | 7.89 | 6.64 |
| ANKRD10-IT1  | 7.25 | 8.25 | 6.47 |
| DNAJC7       | 7.25 | 7.60 | 6.57 |
| ANP32E       | 7.25 | 7.85 | 6.80 |
| ZCCHC6       | 7.25 | 7.70 | 6.42 |
| SOX9         | 7.25 | 8.07 | 6.71 |
| COX6B1       | 7.25 | 7.58 | 6.49 |
| TMEM60       | 7.25 | 7.69 | 6.90 |
| SETX         | 7.25 | 7.58 | 6.61 |
| PNN          | 7.25 | 7.39 | 6.98 |
| SHOC2        | 7.25 | 7.76 | 6.66 |
| ANO6         | 7.25 | 8.11 | 6.29 |
| ZMYM2        | 7.25 | 7.62 | 6.78 |
| PSMB7        | 7.25 | 7.71 | 6.50 |
| ARPC2        | 7.25 | 7.76 | 6.43 |
| ERLEC1       | 7.24 | 7.59 | 6.89 |
| FBXO7        | 7.24 | 7.65 | 6.60 |
| PSMD8        | 7.24 | 7.84 | 6.53 |
| ANPEP        | 7.24 | 8.35 | 6.07 |
| TLK2         | 7.24 | 7.56 | 6.83 |
| RCN2         | 7.24 | 7.49 | 6.66 |
| TAF9B        | 7.24 | 7.61 | 6.63 |
| SEPT2        | 7.24 | 7.67 | 6.75 |
| KDM1A        | 7.24 | 7.96 | 6.49 |
| SYPL1        | 7.24 | 7.68 | 6.54 |
| CNPY2        | 7.23 | 7.53 | 6.86 |
| ANKRD50      | 7.23 | 8.12 | 6.41 |
| TAF13        | 7.23 | 8.32 | 6.29 |
| BTAF1        | 7.23 | 7.61 | 6.55 |
| CBX3         | 7.23 | 7.68 | 6.36 |
| IMPACT       | 7.23 | 7.82 | 6.71 |
| MAN1A2       | 7.23 | 7.55 | 6.66 |
| LOC100127910 | 7.23 | 8.19 | 6.45 |
| COPB1        | 7.23 | 7.86 | 6.55 |
| WIP1         | 7.23 | 8.06 | 6.47 |
| WISP2        | 7.23 | 7.96 | 6.35 |
| ZBED6        | 7.23 | 7.90 | 6.72 |
| BPTF         | 7.23 | 7.58 | 6.65 |
| TRAPPC1      | 7.22 | 7.85 | 6.30 |
| NDUFB7       | 7.22 | 7.66 | 6.65 |
| MARK3        | 7.22 | 7.57 | 6.55 |
| IL1R1        | 7.22 | 7.81 | 6.54 |
| SCP2         | 7.22 | 7.56 | 6.53 |

|                    |      |      |      |
|--------------------|------|------|------|
| JMJD1C             | 7.22 | 7.60 | 6.71 |
| SNHG9              | 7.22 | 7.69 | 6.49 |
| THOC7              | 7.22 | 7.55 | 6.74 |
| COPS2              | 7.22 | 7.67 | 6.71 |
| AGAP5              | 7.22 | 7.55 | 6.89 |
| TNKS2              | 7.21 | 7.54 | 6.24 |
| FAM21C             | 7.21 | 7.61 | 6.58 |
| ZNF106             | 7.21 | 7.60 | 6.78 |
| CD47               | 7.21 | 7.86 | 6.25 |
| AFTPH              | 7.21 | 7.47 | 6.93 |
| ITCH               | 7.21 | 7.80 | 6.47 |
| RBM6               | 7.21 | 7.39 | 6.62 |
| HNRNPR             | 7.21 | 7.55 | 6.82 |
| ARNT               | 7.20 | 7.56 | 6.80 |
| MYO1D              | 7.20 | 8.10 | 6.53 |
| POLR2J4            | 7.20 | 7.79 | 6.72 |
| HHIPL2             | 7.20 | 7.83 | 6.55 |
| TSPAN6             | 7.20 | 8.13 | 6.49 |
| POU5F1P4           | 7.20 | 7.78 | 6.72 |
| GOLGA6L9           | 7.20 | 7.39 | 7.09 |
| KMT2A              | 7.20 | 7.67 | 6.80 |
| ITFG1              | 7.20 | 7.57 | 6.41 |
| HMG3               | 7.20 | 7.60 | 6.66 |
| SNAP23             | 7.20 | 7.53 | 6.80 |
| TOP2B              | 7.20 | 7.67 | 6.37 |
| RHOBTB3            | 7.20 | 7.88 | 6.49 |
| POLR2A             | 7.20 | 7.40 | 6.49 |
| STAM2              | 7.20 | 7.86 | 6.65 |
| SUZ12P1            | 7.20 | 7.88 | 6.69 |
| BSG                | 7.19 | 7.49 | 6.66 |
| TIAL1              | 7.19 | 7.55 | 6.67 |
| LOC100133091       | 7.19 | 7.64 | 6.77 |
| CDC42BPA           | 7.19 | 7.63 | 6.65 |
| ESD                | 7.19 | 7.70 | 6.35 |
| GTF2H2B            | 7.19 | 7.53 | 6.27 |
| COPS6              | 7.19 | 7.44 | 6.88 |
| MAFB               | 7.19 | 8.46 | 6.12 |
| GATAD2B            | 7.19 | 7.48 | 6.47 |
| SPAG9              | 7.19 | 7.59 | 6.44 |
| MIR3661            | 7.19 | 7.87 | 6.70 |
| LOC727896          | 7.19 | 7.71 | 6.40 |
| HNRNPAB            | 7.19 | 7.67 | 6.65 |
| HEXB               | 7.19 | 7.55 | 6.26 |
| RNA5SP488          | 7.19 | 7.62 | 6.80 |
| LOC644450          | 7.18 | 7.53 | 6.65 |
| GPS2               | 7.18 | 7.53 | 6.73 |
| OTTHUMG00000133664 | 7.18 | 7.45 | 6.69 |
| NCBP1              | 7.18 | 7.76 | 6.63 |
| PKD2               | 7.18 | 7.57 | 6.69 |

|                 |      |      |      |
|-----------------|------|------|------|
| TGFBI           | 7.18 | 8.98 | 5.30 |
| DDX42           | 7.18 | 7.50 | 6.65 |
| MIR346          | 7.18 | 7.68 | 6.80 |
| MIR3935         | 7.18 | 7.60 | 6.70 |
| RAD50           | 7.18 | 7.53 | 6.61 |
| RSL1D1          | 7.17 | 7.48 | 6.72 |
| SRGN            | 7.17 | 8.27 | 6.49 |
| SCARA3          | 7.17 | 7.96 | 6.04 |
| CXCL12          | 7.17 | 8.00 | 6.59 |
| HILPDA          | 7.17 | 8.11 | 5.81 |
| HTATSF1         | 7.17 | 7.46 | 6.92 |
| STEAP4          | 7.17 | 8.45 | 5.76 |
| SNRPN           | 7.17 | 7.49 | 6.60 |
| USP22           | 7.17 | 7.48 | 6.62 |
| UBL5            | 7.17 | 7.72 | 6.66 |
| RPL17           | 7.16 | 7.53 | 6.77 |
| PARVA           | 7.16 | 7.75 | 6.12 |
| LOC100652999    | 7.16 | 7.67 | 6.54 |
| FAP             | 7.16 | 8.70 | 5.01 |
| SEPW1           | 7.16 | 7.74 | 6.37 |
| HEG1            | 7.16 | 7.59 | 6.23 |
| SS18            | 7.16 | 7.55 | 6.51 |
| OR2L1P          | 7.16 | 7.96 | 6.79 |
| YIPF2           | 7.16 | 7.62 | 6.43 |
| LARS            | 7.16 | 7.68 | 6.68 |
| COX7C           | 7.16 | 7.36 | 6.77 |
| KLC1            | 7.16 | 7.66 | 6.27 |
| HAPLN1          | 7.16 | 8.30 | 4.94 |
| KLF7-IT1        | 7.16 | 8.07 | 6.57 |
| PATL1           | 7.15 | 7.57 | 6.69 |
| RFTN2           | 7.15 | 7.64 | 6.63 |
| GOLGA7          | 7.15 | 7.62 | 6.48 |
| GSTP1           | 7.15 | 7.50 | 6.66 |
| STOM            | 7.15 | 7.79 | 6.59 |
| SMCHD1          | 7.15 | 7.44 | 6.37 |
| RNASEK-C17orf49 | 7.15 | 7.40 | 6.70 |
| SNORD114-30     | 7.15 | 8.25 | 6.47 |
| HIGD2A          | 7.15 | 7.87 | 6.25 |
| ROBO1           | 7.15 | 7.48 | 6.39 |
| AP2S1           | 7.15 | 7.91 | 6.27 |
| ATP2A2          | 7.15 | 7.74 | 6.41 |
| CHD4            | 7.15 | 7.41 | 6.61 |
| SRPX2           | 7.15 | 8.24 | 6.30 |
| KRT18P15        | 7.15 | 7.78 | 6.75 |
| GPI             | 7.15 | 8.00 | 6.39 |
| SOX4            | 7.14 | 7.83 | 6.16 |
| DNAJC10         | 7.14 | 7.50 | 6.45 |
| CTDNEP1         | 7.14 | 7.68 | 6.51 |
| KPNB1           | 7.14 | 7.54 | 6.68 |



|                    |      |      |      |
|--------------------|------|------|------|
| GPFR               | 7.14 | 7.38 | 6.53 |
| INTS3              | 7.14 | 7.45 | 6.89 |
| STK39              | 7.14 | 7.66 | 6.48 |
| TRA2A              | 7.14 | 7.60 | 6.59 |
| EIF1AX             | 7.14 | 7.84 | 6.56 |
| OTTHUMG00000014335 | 7.14 | 8.10 | 6.44 |
| CYR61              | 7.14 | 7.57 | 6.46 |
| GALNT1             | 7.14 | 7.96 | 5.83 |
| SNORA22            | 7.14 | 7.81 | 6.52 |
| RCOR3              | 7.14 | 7.51 | 6.80 |
| TCEAL8             | 7.14 | 7.63 | 6.51 |
| SNORA11            | 7.13 | 7.69 | 6.43 |
| CTSS               | 7.13 | 8.92 | 5.71 |
| GLS                | 7.13 | 7.56 | 6.31 |
| MIR29C             | 7.13 | 7.58 | 6.46 |
| ZDHHC9             | 7.13 | 7.84 | 6.69 |
| MTCH2              | 7.13 | 7.99 | 6.30 |
| PPIP5K1            | 7.13 | 8.13 | 6.58 |
| ACO1               | 7.13 | 7.55 | 6.61 |
| GATC               | 7.13 | 7.49 | 6.78 |
| LAMB2              | 7.13 | 7.40 | 6.45 |
| OTTHUMG00000008492 | 7.13 | 7.53 | 6.46 |
| PDE4DIP            | 7.13 | 7.33 | 6.84 |
| SF3B14             | 7.13 | 7.61 | 6.63 |
| ENOSF1             | 7.13 | 7.64 | 6.78 |
| DNM3OS             | 7.13 | 7.92 | 6.09 |
| MKLN1              | 7.12 | 7.55 | 6.41 |
| BDP1               | 7.12 | 7.44 | 6.82 |
| KLF3               | 7.12 | 7.61 | 6.51 |
| SCD                | 7.12 | 8.05 | 6.43 |
| CDC27              | 7.12 | 7.48 | 6.90 |
| GOLGA4             | 7.12 | 7.45 | 6.64 |
| NDUFS6             | 7.12 | 7.44 | 6.56 |
| LCE3B              | 7.12 | 7.64 | 6.60 |
| COL15A1            | 7.12 | 7.72 | 6.11 |
| LY6G5B             | 7.12 | 7.27 | 6.93 |
| PITPNA-AS1         | 7.12 | 7.28 | 6.98 |
| ATP6V1G1           | 7.12 | 7.37 | 6.52 |
| MIR1229            | 7.12 | 7.78 | 6.14 |
| FIP1L1             | 7.12 | 7.36 | 6.73 |
| LAMP1              | 7.12 | 7.42 | 6.59 |
| LOC100287934       | 7.12 | 7.49 | 6.67 |
| OTTHUMG00000169101 | 7.11 | 7.52 | 6.70 |
| MBD2               | 7.11 | 7.41 | 6.58 |
| CCDC144CP          | 7.11 | 8.33 | 6.17 |
| CBWD3              | 7.11 | 7.44 | 6.79 |
| CAMLG              | 7.11 | 7.56 | 6.66 |
| HERC4              | 7.11 | 7.53 | 6.61 |
| KDM2A              | 7.11 | 7.46 | 6.51 |

|              |      |       |      |
|--------------|------|-------|------|
| BAZ1B        | 7.11 | 7.45  | 6.44 |
| ERP44        | 7.11 | 7.49  | 6.42 |
| CDC73        | 7.11 | 7.44  | 6.42 |
| TMEM131      | 7.11 | 7.61  | 6.60 |
| FKBP10       | 7.11 | 7.59  | 6.60 |
| TIMP2        | 7.11 | 7.76  | 6.23 |
| DDRGK1       | 7.10 | 7.59  | 6.65 |
| ADNP         | 7.10 | 7.57  | 6.36 |
| BUB3         | 7.10 | 7.79  | 6.36 |
| ADAM9        | 7.10 | 7.81  | 6.29 |
| EPS8         | 7.10 | 7.76  | 6.48 |
| TSIX         | 7.10 | 10.07 | 4.71 |
| HSPB1        | 7.10 | 7.59  | 6.52 |
| ROCK2        | 7.09 | 7.51  | 6.29 |
| DICER1       | 7.09 | 7.45  | 6.45 |
| TCP1         | 7.09 | 7.67  | 6.39 |
| MIR4739      | 7.09 | 8.34  | 6.31 |
| NICN1        | 7.09 | 7.36  | 6.82 |
| CSGALNACT2   | 7.09 | 7.79  | 5.91 |
| IPO7         | 7.09 | 7.93  | 6.30 |
| PPP1CC       | 7.09 | 7.51  | 6.32 |
| STARD13-AS   | 7.09 | 7.61  | 6.60 |
| PTGR1        | 7.09 | 7.51  | 6.71 |
| PPFIBP1      | 7.09 | 8.10  | 6.21 |
| ITGA10       | 7.09 | 7.71  | 6.11 |
| STK38L       | 7.09 | 7.75  | 6.55 |
| YWHAG        | 7.09 | 7.66  | 6.70 |
| FNDC1        | 7.09 | 8.59  | 4.82 |
| GOLM1        | 7.08 | 7.99  | 6.44 |
| YAP1         | 7.08 | 7.61  | 6.59 |
| ERC1         | 7.08 | 7.32  | 6.54 |
| DPM1         | 7.08 | 7.46  | 6.60 |
| PRDX6        | 7.08 | 7.33  | 6.84 |
| HERPUD2      | 7.08 | 7.43  | 6.49 |
| KDELC2       | 7.08 | 7.48  | 6.26 |
| CHD2         | 7.08 | 7.38  | 6.69 |
| RPS3         | 7.08 | 7.23  | 6.90 |
| PSMC5        | 7.08 | 7.59  | 6.39 |
| LGALSL       | 7.08 | 7.33  | 6.54 |
| SPECC1       | 7.08 | 7.62  | 6.61 |
| LOC100133130 | 7.08 | 7.53  | 6.61 |
| ZMYM4        | 7.08 | 7.39  | 6.48 |
| DLGAP4       | 7.08 | 7.59  | 6.87 |
| C12orf23     | 7.08 | 7.49  | 6.64 |
| PAPD4        | 7.08 | 7.39  | 6.52 |
| SPIN1        | 7.08 | 7.49  | 6.41 |
| RSL24D1      | 7.08 | 7.40  | 6.68 |
| LOC728323    | 7.07 | 7.74  | 6.36 |
| MORF4L2      | 7.07 | 7.64  | 6.21 |

|                    |      |      |      |
|--------------------|------|------|------|
| THRAP3             | 7.07 | 7.40 | 6.15 |
| BROX               | 7.07 | 7.54 | 6.41 |
| KIAA0040           | 7.07 | 7.81 | 6.57 |
| SRSF7              | 7.07 | 7.58 | 6.09 |
| ATP5C1             | 7.07 | 7.43 | 6.19 |
| PARK7              | 7.07 | 7.26 | 6.80 |
| FGL2               | 7.07 | 8.94 | 5.28 |
| ATRX               | 7.07 | 7.45 | 6.47 |
| CSNK2A2            | 7.07 | 7.45 | 6.28 |
| POLR2B             | 7.06 | 7.44 | 6.48 |
| MEF2A              | 7.06 | 7.42 | 6.49 |
| SLFN5              | 7.06 | 7.63 | 6.65 |
| COMMD4             | 7.06 | 7.72 | 6.62 |
| ESF1               | 7.06 | 7.55 | 6.16 |
| RBMX               | 7.06 | 7.40 | 6.63 |
| RPL29P2            | 7.06 | 7.31 | 6.72 |
| EPRS               | 7.06 | 7.50 | 6.55 |
| ILF3               | 7.06 | 7.49 | 6.34 |
| KHDRBS1            | 7.06 | 7.53 | 6.37 |
| TNPO1              | 7.06 | 7.55 | 6.48 |
| KRIT1              | 7.05 | 7.61 | 6.47 |
| LINC00566          | 7.05 | 7.72 | 6.52 |
| MAPK1IP1L          | 7.05 | 7.62 | 6.61 |
| MATN3              | 7.05 | 9.80 | 5.03 |
| TIPARP             | 7.05 | 7.63 | 6.52 |
| REXO1L1            | 7.05 | 8.25 | 6.45 |
| MIR210             | 7.05 | 7.70 | 6.56 |
| OTTHUMG00000155081 | 7.05 | 8.00 | 6.48 |
| PHIP               | 7.05 | 7.36 | 6.76 |
| LOC100128508       | 7.05 | 7.61 | 6.53 |
| PSME1              | 7.05 | 7.66 | 6.39 |
| SMAD4              | 7.05 | 7.57 | 6.17 |
| FIBIN              | 7.05 | 7.81 | 5.90 |
| LOC100507217       | 7.05 | 7.48 | 6.02 |
| HERPUD1            | 7.05 | 7.53 | 6.28 |
| LIFR               | 7.05 | 7.53 | 6.29 |
| RNPC3              | 7.05 | 7.52 | 6.32 |
| HINT1              | 7.05 | 7.20 | 6.72 |
| SUV420H1           | 7.05 | 7.49 | 6.49 |
| MAMDC2             | 7.05 | 8.16 | 5.36 |
| LASP1              | 7.05 | 7.46 | 6.54 |
| LOC100130285       | 7.05 | 7.45 | 6.79 |
| OTTHUMG00000161861 | 7.05 | 7.79 | 6.34 |
| ZBTB20             | 7.05 | 7.53 | 6.77 |
| KIAA1033           | 7.04 | 7.52 | 6.12 |
| RGL1               | 7.04 | 7.56 | 6.57 |
| OLFML2B            | 7.04 | 7.88 | 5.97 |
| BCLAF1             | 7.04 | 7.38 | 6.33 |
| DHRS7              | 7.04 | 7.40 | 6.41 |

|              |      |      |      |
|--------------|------|------|------|
| PMPCB        | 7.04 | 7.55 | 6.24 |
| MIR3155A     | 7.04 | 7.36 | 6.52 |
| TIA1         | 7.04 | 7.56 | 6.30 |
| MIA-RAB4B    | 7.04 | 7.41 | 6.29 |
| REV3L        | 7.04 | 7.39 | 6.57 |
| VSIG4        | 7.04 | 8.68 | 5.08 |
| XPOT         | 7.04 | 7.65 | 6.00 |
| KIAA1377     | 7.03 | 7.53 | 6.50 |
| AUP1         | 7.03 | 7.54 | 6.48 |
| COPG1        | 7.03 | 7.47 | 6.40 |
| KRT16P2      | 7.03 | 7.25 | 6.42 |
| EEA1         | 7.03 | 7.92 | 6.12 |
| SEMA3C       | 7.03 | 8.19 | 5.14 |
| ITPR2        | 7.03 | 7.61 | 6.56 |
| EIF3G        | 7.03 | 7.53 | 6.28 |
| NDUFA2       | 7.03 | 7.42 | 6.60 |
| IER3IP1      | 7.03 | 7.78 | 6.15 |
| HNRNPL       | 7.03 | 7.35 | 6.62 |
| LOC100506990 | 7.03 | 7.38 | 6.63 |
| XRN1         | 7.03 | 7.44 | 6.15 |
| WASL         | 7.03 | 7.73 | 6.22 |
| COG5         | 7.03 | 7.35 | 6.44 |
| IFT20        | 7.03 | 7.41 | 6.44 |
| ACADVL       | 7.03 | 7.49 | 6.17 |
| TRIP12       | 7.03 | 7.40 | 6.40 |
| MIR1250      | 7.03 | 7.32 | 6.59 |
| AP2M1        | 7.03 | 7.50 | 6.69 |
| CCT5         | 7.03 | 7.52 | 6.54 |
| C1orf63      | 7.02 | 7.33 | 6.60 |
| CCT2         | 7.02 | 7.75 | 6.35 |
| TCF7L2       | 7.02 | 7.44 | 6.58 |
| ZNF521       | 7.02 | 7.51 | 6.22 |
| CLMP         | 7.02 | 8.03 | 5.86 |
| LUC7L        | 7.02 | 7.32 | 6.50 |
| FAM222B      | 7.02 | 7.31 | 6.76 |
| RNU1-18P     | 7.02 | 7.35 | 6.57 |
| NDRG1        | 7.02 | 7.85 | 6.47 |
| MIR184       | 7.02 | 8.44 | 6.43 |
| UBL3         | 7.02 | 7.93 | 5.95 |
| GOLGA8R      | 7.02 | 7.35 | 6.58 |
| RASA1        | 7.02 | 7.52 | 6.46 |
| ARL17B       | 7.02 | 7.84 | 6.25 |
| PPIG         | 7.02 | 7.22 | 6.47 |
| FAM86B2      | 7.02 | 7.86 | 6.40 |
| SNRPB2       | 7.02 | 7.37 | 6.67 |
| DDX18        | 7.01 | 7.35 | 6.61 |
| EMP1         | 7.01 | 7.58 | 5.88 |
| ULK4P3       | 7.01 | 7.33 | 6.15 |
| TMED10       | 7.01 | 7.62 | 6.15 |

|                    |      |      |      |
|--------------------|------|------|------|
| EPAS1              | 7.01 | 7.64 | 6.37 |
| MAP4               | 7.01 | 7.53 | 6.30 |
| HERC2P7            | 7.01 | 7.53 | 6.17 |
| TMEM214            | 7.01 | 7.37 | 6.46 |
| DCXR               | 7.01 | 7.47 | 6.53 |
| GOLGA2             | 7.01 | 7.31 | 6.50 |
| TMTC3              | 7.01 | 7.74 | 6.10 |
| NCOR1              | 7.01 | 7.32 | 6.30 |
| PRG2               | 7.01 | 7.80 | 5.59 |
| JUND               | 7.01 | 7.40 | 6.63 |
| VPS4B              | 7.01 | 7.47 | 6.19 |
| UBAP2L             | 7.01 | 7.30 | 6.62 |
| MGA                | 7.01 | 7.23 | 6.68 |
| STAT1              | 7.01 | 7.33 | 6.60 |
| TBL1XR1            | 7.01 | 7.60 | 6.22 |
| UBE3A              | 7.00 | 7.46 | 6.37 |
| MNF1               | 7.00 | 7.82 | 6.07 |
| SMIM19             | 7.00 | 7.53 | 6.21 |
| UBAP2              | 7.00 | 7.41 | 6.69 |
| TMEM30A            | 7.00 | 7.70 | 6.34 |
| LINC00938          | 7.00 | 7.16 | 6.70 |
| PHAX               | 7.00 | 7.47 | 6.25 |
| LOC651337          | 7.00 | 7.43 | 6.63 |
| MRPL41             | 7.00 | 7.64 | 6.34 |
| PPIAL4A            | 7.00 | 7.64 | 5.97 |
| MPC2               | 7.00 | 7.50 | 6.03 |
| CRIM1              | 7.00 | 7.77 | 5.59 |
| SCUBE1             | 7.00 | 8.19 | 4.82 |
| FCHSD2             | 7.00 | 7.27 | 6.65 |
| RCN1               | 7.00 | 7.26 | 6.38 |
| GPBP1L1            | 6.99 | 7.29 | 6.49 |
| TMED4              | 6.99 | 7.62 | 6.29 |
| DERL1              | 6.99 | 7.51 | 6.03 |
| SCARNA2            | 6.99 | 7.60 | 6.21 |
| ITGB1              | 6.99 | 7.96 | 6.05 |
| VPS53              | 6.99 | 7.28 | 6.45 |
| C17orf85           | 6.99 | 7.31 | 6.48 |
| POM121C            | 6.99 | 7.33 | 6.44 |
| OTTHUMG00000030769 | 6.99 | 7.72 | 5.89 |
| TMX1               | 6.99 | 7.49 | 6.41 |
| DARS               | 6.99 | 7.44 | 6.64 |
| ZMYM6NB            | 6.99 | 7.42 | 6.57 |
| PDS5B              | 6.99 | 7.44 | 6.63 |
| BLOC1S6            | 6.99 | 7.59 | 6.33 |
| ACTN4              | 6.99 | 7.54 | 6.32 |
| FAT1               | 6.99 | 7.70 | 6.11 |
| PHC3               | 6.99 | 7.34 | 6.68 |
| MIR663B            | 6.99 | 7.53 | 6.78 |
| NUDC               | 6.99 | 7.40 | 6.65 |

|              |      |      |      |
|--------------|------|------|------|
| MIR5047      | 6.99 | 7.78 | 5.95 |
| TMEM89       | 6.98 | 7.19 | 6.64 |
| TXNDC17      | 6.98 | 7.77 | 6.10 |
| SEPN1        | 6.98 | 7.17 | 6.72 |
| MYSM1        | 6.98 | 7.31 | 6.43 |
| NCOA3        | 6.98 | 7.44 | 6.19 |
| MIR421       | 6.98 | 7.56 | 6.33 |
| CYP4V2       | 6.98 | 7.37 | 6.40 |
| NAP1L1       | 6.98 | 7.16 | 6.71 |
| DARC         | 6.98 | 7.91 | 6.00 |
| CDK4         | 6.98 | 7.48 | 6.63 |
| GNG11        | 6.98 | 7.99 | 6.06 |
| KRTAP4-16P   | 6.98 | 7.17 | 6.69 |
| SEC62        | 6.98 | 7.28 | 6.51 |
| MMP9         | 6.98 | 8.98 | 5.21 |
| SP1          | 6.98 | 7.39 | 6.14 |
| TARDBP       | 6.98 | 7.36 | 6.28 |
| CCNL1        | 6.98 | 7.25 | 6.48 |
| LINC00854    | 6.98 | 7.15 | 6.65 |
| ALG11        | 6.97 | 7.31 | 6.49 |
| CAST         | 6.97 | 7.31 | 6.24 |
| SNX9         | 6.97 | 7.67 | 5.76 |
| TCF25        | 6.97 | 7.28 | 6.29 |
| UBE2D3       | 6.97 | 7.17 | 6.67 |
| GSTA4        | 6.97 | 7.32 | 6.54 |
| ZMIZ1        | 6.97 | 7.41 | 6.46 |
| CDH13        | 6.97 | 7.98 | 5.27 |
| PRB1         | 6.97 | 7.74 | 6.40 |
| ZMPSTE24     | 6.97 | 7.84 | 5.91 |
| MIR3622B     | 6.97 | 7.42 | 6.57 |
| ZC3H7A       | 6.97 | 7.31 | 6.23 |
| NDUFV2       | 6.97 | 7.37 | 6.42 |
| PSMB2        | 6.96 | 7.37 | 6.46 |
| ATL3         | 6.96 | 7.44 | 6.33 |
| HGSNAT       | 6.96 | 7.45 | 6.10 |
| SNORA50      | 6.96 | 7.41 | 6.26 |
| DEFB1        | 6.96 | 7.89 | 5.74 |
| SMS          | 6.96 | 7.51 | 6.48 |
| GPR137B      | 6.96 | 7.68 | 6.14 |
| PIK3C2A      | 6.95 | 7.30 | 6.59 |
| ANAPC5       | 6.95 | 7.25 | 6.28 |
| LOC646513    | 6.95 | 7.46 | 6.17 |
| IGKV1-39     | 6.95 | 7.96 | 6.31 |
| LINC00265    | 6.95 | 7.24 | 6.62 |
| LOC100996568 | 6.95 | 7.34 | 6.62 |
| SMARCA2      | 6.95 | 7.44 | 6.17 |
| PDE7B        | 6.95 | 8.05 | 6.10 |
| ADIRF        | 6.95 | 7.46 | 6.48 |
| CDC5L        | 6.95 | 7.39 | 6.30 |

|                           |      |      |      |
|---------------------------|------|------|------|
| <i>BRD7</i>               | 6.95 | 7.34 | 6.34 |
| <i>TAPBP</i>              | 6.95 | 7.17 | 6.68 |
| <i>SNORD13P3</i>          | 6.95 | 7.64 | 6.38 |
| <i>C1orf21</i>            | 6.95 | 7.55 | 6.15 |
| <i>EBPL</i>               | 6.95 | 7.34 | 6.41 |
| <i>DYNC1H1</i>            | 6.95 | 7.48 | 6.09 |
| <i>AHSA2</i>              | 6.95 | 7.27 | 6.39 |
| <i>SPTAN1</i>             | 6.95 | 7.36 | 6.13 |
| <i>TRIP11</i>             | 6.95 | 7.42 | 6.17 |
| <i>ATXN2</i>              | 6.95 | 7.12 | 6.67 |
| <i>RNA5SP413</i>          | 6.95 | 7.82 | 6.56 |
| <i>ARFGEF1</i>            | 6.94 | 7.26 | 6.57 |
| <i>TRBV23-1</i>           | 6.94 | 7.06 | 6.52 |
| <i>LARP1</i>              | 6.94 | 7.25 | 6.24 |
| <i>AGFG1</i>              | 6.94 | 7.55 | 6.01 |
| <i>ERBB2IP</i>            | 6.94 | 7.52 | 6.26 |
| <i>B4GALT1</i>            | 6.94 | 7.80 | 6.42 |
| <i>PCGF2</i>              | 6.94 | 7.49 | 6.25 |
| <i>LYVE1</i>              | 6.94 | 8.10 | 4.97 |
| <i>SEN3-EIF4A1</i>        | 6.94 | 7.45 | 6.59 |
| <i>MKI67IP</i>            | 6.94 | 7.34 | 6.42 |
| <i>PI4KAP2</i>            | 6.94 | 7.46 | 6.30 |
| <i>SEC22B</i>             | 6.94 | 7.41 | 6.51 |
| <i>SMARCC1</i>            | 6.93 | 7.30 | 6.36 |
| <i>OR2T3</i>              | 6.93 | 7.62 | 6.45 |
| <i>ANKRD17</i>            | 6.93 | 7.29 | 6.35 |
| <i>OTTHUMG00000169461</i> | 6.93 | 7.50 | 6.50 |
| <i>MIR449B</i>            | 6.93 | 7.30 | 6.49 |
| <i>GSK3B</i>              | 6.93 | 7.58 | 6.16 |
| <i>BUD31</i>              | 6.93 | 7.49 | 6.09 |
| <i>PPAP2A</i>             | 6.93 | 7.62 | 5.87 |
| <i>ITGA11</i>             | 6.93 | 8.36 | 5.76 |
| <i>SCPEP1</i>             | 6.93 | 7.34 | 6.43 |
| <i>EWSR1</i>              | 6.93 | 7.18 | 6.50 |
| <i>RTN3</i>               | 6.93 | 7.22 | 6.37 |
| <i>DNAJA2</i>             | 6.93 | 7.39 | 6.28 |
| <i>USP48</i>              | 6.93 | 7.34 | 6.31 |
| <i>SMAD2</i>              | 6.93 | 7.27 | 6.36 |
| <i>RNF38</i>              | 6.93 | 7.19 | 6.64 |
| <i>MIR606</i>             | 6.93 | 7.40 | 6.16 |
| <i>SERPIN6</i>            | 6.93 | 7.24 | 6.48 |
| <i>FUCA2</i>              | 6.93 | 7.42 | 6.30 |
| <i>MAP4K4</i>             | 6.92 | 7.53 | 6.03 |
| <i>CNPY3</i>              | 6.92 | 7.26 | 6.63 |
| <i>FBXL20</i>             | 6.92 | 7.38 | 6.19 |
| <i>GOLGA8I</i>            | 6.92 | 7.19 | 6.51 |
| <i>XPO1</i>               | 6.92 | 7.36 | 6.36 |
| <i>SEC24A</i>             | 6.92 | 7.65 | 6.38 |
| <i>ARF6</i>               | 6.92 | 7.55 | 6.18 |

|                    |      |      |      |
|--------------------|------|------|------|
| OTTHUMG00000161858 | 6.92 | 7.95 | 6.34 |
| PPP6R3             | 6.92 | 7.29 | 6.31 |
| SH3D19             | 6.92 | 7.55 | 5.84 |
| PARN               | 6.92 | 7.34 | 6.30 |
| OR2A20P            | 6.92 | 7.46 | 6.54 |
| HELZ               | 6.92 | 7.25 | 6.48 |
| MAF                | 6.92 | 7.47 | 6.14 |
| B4GALT2            | 6.92 | 7.45 | 6.32 |
| DDX46              | 6.92 | 7.30 | 6.57 |
| SNORD116-3         | 6.92 | 7.49 | 5.98 |
| UBR4               | 6.92 | 7.34 | 6.32 |
| ARID4B             | 6.92 | 7.11 | 6.44 |
| ENAH               | 6.92 | 7.58 | 6.25 |
| PSMD1              | 6.92 | 7.77 | 5.92 |
| CAMK1D             | 6.92 | 7.42 | 6.10 |
| BAZ2B              | 6.92 | 7.26 | 6.30 |
| MRPL35             | 6.91 | 7.52 | 6.41 |
| SERTAD4            | 6.91 | 7.86 | 5.47 |
| MAGI2-AS3          | 6.91 | 7.12 | 6.60 |
| RBM26              | 6.91 | 7.17 | 6.49 |
| PDGFRL             | 6.91 | 7.80 | 5.85 |
| PCNXL4             | 6.91 | 7.53 | 6.23 |
| TTC17              | 6.91 | 7.19 | 6.66 |
| SND1               | 6.91 | 7.33 | 6.55 |
| HNRNPD             | 6.91 | 7.10 | 6.50 |
| ATF6               | 6.91 | 7.31 | 6.44 |
| KLHDC10            | 6.91 | 7.34 | 6.30 |
| DNAJC5             | 6.91 | 7.10 | 6.69 |
| ARPP19             | 6.91 | 7.58 | 5.72 |
| SF1                | 6.91 | 7.30 | 6.58 |
| HIVEP2             | 6.91 | 8.02 | 5.76 |
| PLEKHA1            | 6.91 | 7.53 | 6.02 |
| NEMF               | 6.91 | 7.26 | 6.41 |
| STX8               | 6.91 | 7.34 | 6.21 |
| LPAR1              | 6.91 | 7.15 | 6.56 |
| ASAP1              | 6.91 | 7.44 | 6.05 |
| FGFR2              | 6.91 | 7.83 | 6.18 |
| GNB1               | 6.91 | 7.28 | 6.48 |
| PHF10              | 6.91 | 7.40 | 5.98 |
| NUFIP2             | 6.91 | 7.53 | 5.86 |
| SMIM14             | 6.91 | 7.37 | 6.00 |
| LRCH3              | 6.91 | 7.23 | 6.28 |
| AIMP1              | 6.91 | 7.34 | 6.44 |
| SNORA70G           | 6.91 | 7.84 | 5.06 |
| DOCK11             | 6.91 | 7.45 | 5.86 |
| APOOL              | 6.91 | 7.19 | 6.56 |
| TPRG1              | 6.91 | 7.51 | 6.21 |
| TMEM45A            | 6.91 | 7.65 | 6.47 |
| MUC22              | 6.91 | 7.63 | 6.46 |



|              |      |       |      |
|--------------|------|-------|------|
| NAA50        | 6.90 | 7.46  | 6.08 |
| TPM1         | 6.90 | 7.83  | 6.06 |
| PARP4        | 6.90 | 7.61  | 5.75 |
| XYLT1        | 6.90 | 7.58  | 6.45 |
| SMYD3-IT1    | 6.90 | 8.28  | 5.91 |
| RIOK3        | 6.90 | 7.28  | 6.27 |
| SF3B5        | 6.90 | 7.35  | 6.62 |
| TGFBR1       | 6.90 | 7.83  | 5.97 |
| ASAP2        | 6.90 | 7.63  | 5.95 |
| SF3A3        | 6.90 | 7.19  | 6.33 |
| CSTF3        | 6.90 | 7.26  | 6.15 |
| SNX27        | 6.90 | 7.25  | 6.18 |
| NID2         | 6.90 | 7.76  | 5.87 |
| CLK4         | 6.90 | 7.19  | 6.51 |
| SRSF1        | 6.90 | 7.19  | 6.62 |
| SDCCAG8      | 6.90 | 7.23  | 6.61 |
| SPINT2       | 6.90 | 7.85  | 5.42 |
| RPS23        | 6.90 | 7.12  | 6.42 |
| CYP2A7P1     | 6.90 | 7.93  | 6.28 |
| MAGED2       | 6.90 | 7.42  | 6.17 |
| TULP3        | 6.90 | 7.33  | 5.95 |
| XPO6         | 6.90 | 7.52  | 6.13 |
| MMP14        | 6.90 | 8.47  | 5.43 |
| STARD7       | 6.90 | 7.57  | 6.33 |
| MMP13        | 6.90 | 8.70  | 3.31 |
| DYM          | 6.89 | 7.36  | 6.31 |
| TRIQK        | 6.89 | 7.21  | 6.33 |
| TK2          | 6.89 | 7.19  | 6.45 |
| SNORD116-8   | 6.89 | 7.50  | 5.83 |
| ANKRD28      | 6.89 | 7.69  | 5.90 |
| SNRNP200     | 6.89 | 7.20  | 6.42 |
| GTF3A        | 6.89 | 7.40  | 6.42 |
| DERL2        | 6.89 | 7.55  | 6.24 |
| FRY          | 6.89 | 7.86  | 5.72 |
| TNFAIP6      | 6.89 | 9.08  | 4.60 |
| CEP350       | 6.89 | 7.34  | 6.45 |
| PBRM1        | 6.89 | 7.37  | 6.28 |
| EIF2A        | 6.89 | 7.35  | 6.36 |
| CBFB         | 6.89 | 7.27  | 6.10 |
| WDR83OS      | 6.89 | 7.32  | 5.77 |
| SNORA33      | 6.89 | 7.36  | 6.53 |
| LOC100129502 | 6.89 | 7.30  | 5.97 |
| GATAD1       | 6.89 | 7.14  | 6.60 |
| KRTAP5-1     | 6.89 | 7.34  | 6.51 |
| XIST         | 6.89 | 10.68 | 3.34 |
| AMOTL1       | 6.89 | 7.15  | 6.42 |
| TRPM7        | 6.88 | 7.39  | 6.27 |
| ADIPOR1      | 6.88 | 7.27  | 6.39 |
| RNA5SP370    | 6.88 | 7.34  | 6.39 |

|                    |      |      |      |
|--------------------|------|------|------|
| TRPC1              | 6.88 | 7.51 | 6.29 |
| EPS15              | 6.88 | 7.40 | 6.09 |
| GOPC               | 6.88 | 7.22 | 6.26 |
| SDC4               | 6.88 | 7.48 | 6.41 |
| ATP6AP2            | 6.88 | 7.76 | 5.90 |
| RAB11A             | 6.88 | 7.33 | 6.20 |
| ZC3H15             | 6.88 | 7.11 | 6.39 |
| TSG101             | 6.88 | 7.28 | 6.39 |
| LOC100287704       | 6.88 | 7.08 | 6.57 |
| RBP5               | 6.88 | 7.36 | 6.63 |
| GPX4               | 6.88 | 7.11 | 6.47 |
| SCAF11             | 6.88 | 7.19 | 6.47 |
| NMD3               | 6.88 | 7.33 | 6.00 |
| FTX                | 6.88 | 7.21 | 6.17 |
| OTTHUMG00000156440 | 6.88 | 7.79 | 6.13 |
| RNA5SP161          | 6.88 | 7.72 | 6.36 |
| POGZ               | 6.88 | 7.23 | 6.41 |
| TCEA3              | 6.88 | 7.24 | 6.49 |
| MIA3               | 6.88 | 7.30 | 6.06 |
| NCOA1              | 6.88 | 7.10 | 6.49 |
| SNX14              | 6.88 | 7.35 | 5.95 |
| TRAPPC6B           | 6.87 | 7.29 | 6.13 |
| MED13L             | 6.87 | 7.47 | 6.32 |
| MIR3650            | 6.87 | 7.43 | 6.31 |
| LTBP2              | 6.87 | 7.83 | 6.26 |
| SNORA8             | 6.87 | 7.43 | 6.36 |
| NAMPT              | 6.87 | 7.73 | 5.57 |
| EIF3J              | 6.87 | 7.14 | 6.45 |
| OTTHUMG00000170985 | 6.87 | 7.43 | 5.86 |
| SAMHD1             | 6.87 | 8.27 | 6.00 |
| MED13              | 6.87 | 7.53 | 6.05 |
| MIR433             | 6.87 | 7.17 | 6.68 |
| SNX6               | 6.87 | 7.20 | 6.32 |
| TMEM43             | 6.87 | 7.75 | 5.67 |
| CBX5               | 6.87 | 7.26 | 6.30 |
| THBS4              | 6.87 | 7.38 | 5.55 |
| OTTHUMG00000161852 | 6.87 | 7.96 | 6.29 |
| IMMT               | 6.87 | 7.37 | 6.16 |
| PRDX2              | 6.87 | 7.41 | 6.35 |
| MAPRE1             | 6.87 | 7.46 | 5.94 |
| ETS2               | 6.86 | 7.53 | 6.30 |
| ARFGAP3            | 6.86 | 7.62 | 6.17 |
| HIST1H2BH          | 6.86 | 7.40 | 6.37 |
| TRIM33             | 6.86 | 7.26 | 6.29 |
| ATP6V1F            | 6.86 | 7.16 | 6.26 |
| LONP2              | 6.86 | 7.08 | 6.44 |
| HADHB              | 6.86 | 7.36 | 5.88 |
| RANBP2             | 6.86 | 7.26 | 6.39 |
| VDAC1              | 6.86 | 7.36 | 6.33 |

|              |      |      |      |
|--------------|------|------|------|
| PPWD1        | 6.86 | 7.17 | 6.53 |
| THOC2        | 6.86 | 7.28 | 5.89 |
| WDFY3        | 6.86 | 7.31 | 6.36 |
| STRN3        | 6.86 | 7.34 | 6.23 |
| BMP2K        | 6.86 | 7.76 | 5.85 |
| KLHDC1       | 6.86 | 7.46 | 6.48 |
| PSMB5        | 6.86 | 7.17 | 6.48 |
| ELK3         | 6.86 | 7.31 | 6.15 |
| LITAF        | 6.86 | 7.15 | 6.57 |
| CBLB         | 6.86 | 7.21 | 6.33 |
| SLC16A4      | 6.86 | 7.43 | 6.44 |
| PSIP1        | 6.86 | 7.09 | 6.37 |
| ALDOA        | 6.86 | 7.38 | 6.37 |
| ZNF280D      | 6.86 | 7.14 | 6.44 |
| SLC39A7      | 6.86 | 7.31 | 6.53 |
| ATP2B1       | 6.86 | 7.71 | 6.39 |
| ODC1         | 6.85 | 7.17 | 6.39 |
| TMEM165      | 6.85 | 7.58 | 6.16 |
| CHIC2        | 6.85 | 7.50 | 6.15 |
| PSMD12       | 6.85 | 7.36 | 6.03 |
| REXO1L2P     | 6.85 | 7.65 | 6.26 |
| PRSS23       | 6.85 | 7.55 | 6.30 |
| MPP6         | 6.85 | 7.31 | 6.16 |
| MSL1         | 6.85 | 7.08 | 6.53 |
| DCTN5        | 6.85 | 7.34 | 6.26 |
| HOOK3        | 6.85 | 7.39 | 5.93 |
| MIS12        | 6.85 | 7.11 | 6.39 |
| SNTB2        | 6.85 | 7.22 | 6.21 |
| GBF1         | 6.85 | 7.35 | 6.46 |
| RCC2         | 6.85 | 7.19 | 6.57 |
| ALDOC        | 6.85 | 7.26 | 6.58 |
| NOP58        | 6.85 | 7.11 | 6.46 |
| LOC100132705 | 6.85 | 8.29 | 5.61 |
| VPS39        | 6.85 | 7.23 | 5.90 |
| IRF2BP2      | 6.85 | 7.40 | 6.12 |
| LEPRE1       | 6.85 | 7.56 | 6.04 |
| NRAS         | 6.84 | 7.93 | 5.43 |
| HSPA1B       | 6.84 | 7.33 | 6.51 |
| RPL36AL      | 6.84 | 7.13 | 6.36 |
| WASH1        | 6.84 | 7.12 | 6.67 |
| EVI5         | 6.84 | 7.33 | 6.21 |
| SLC25A37     | 6.84 | 7.42 | 6.31 |
| WHSC1L1      | 6.84 | 7.16 | 6.43 |
| ABI2         | 6.84 | 7.26 | 5.92 |
| C1QC         | 6.84 | 7.99 | 5.81 |
| ASPH         | 6.84 | 7.21 | 6.56 |
| MIR339       | 6.84 | 7.24 | 6.19 |
| LMAN2        | 6.84 | 7.23 | 6.22 |
| PARG         | 6.84 | 7.40 | 6.52 |

|                    |      |      |      |
|--------------------|------|------|------|
| OTTHUMG00000021966 | 6.84 | 7.36 | 6.55 |
| TMEM14E            | 6.84 | 7.57 | 6.38 |
| ATP11B             | 6.84 | 7.50 | 6.22 |
| ANGPTL7            | 6.84 | 9.14 | 4.71 |
| CLCC1              | 6.84 | 7.21 | 6.27 |
| MAP1B              | 6.84 | 7.39 | 6.23 |
| VCL                | 6.84 | 7.67 | 6.11 |
| ERCC1              | 6.83 | 7.24 | 6.45 |
| SNRPA              | 6.83 | 7.19 | 6.30 |
| GLT8D2             | 6.83 | 7.47 | 5.81 |
| NT5E               | 6.83 | 8.13 | 5.16 |
| OTTHUMG00000170174 | 6.83 | 7.52 | 6.38 |
| MIR342             | 6.83 | 7.36 | 6.31 |
| C7orf55-LUC7L2     | 6.83 | 7.22 | 6.57 |
| SEPT9              | 6.83 | 7.16 | 6.59 |
| TIPRL              | 6.83 | 7.34 | 5.99 |
| FCGR1B             | 6.83 | 7.28 | 6.40 |
| PDCD6IP            | 6.83 | 7.29 | 6.13 |
| CD163              | 6.83 | 8.07 | 5.22 |
| CLSTN1             | 6.83 | 7.49 | 6.21 |
| SLC25A3            | 6.83 | 7.23 | 6.21 |
| FAM46A             | 6.83 | 7.13 | 6.46 |
| CMAHP              | 6.83 | 7.29 | 6.06 |
| EXOSC10            | 6.83 | 7.11 | 6.41 |
| FERMT2             | 6.83 | 7.61 | 6.31 |
| TMEM116            | 6.83 | 7.10 | 6.60 |
| SMG1               | 6.83 | 7.13 | 6.19 |
| CYSTM1             | 6.83 | 7.30 | 6.37 |
| NDUFA11            | 6.83 | 7.11 | 6.52 |
| LECT1              | 6.82 | 8.00 | 5.05 |
| NFKBIA             | 6.82 | 7.41 | 6.42 |
| PCBD2              | 6.82 | 7.09 | 6.68 |
| LOC100506748       | 6.82 | 7.61 | 5.69 |
| LOC100289637       | 6.82 | 7.62 | 6.55 |
| WLS                | 6.82 | 7.31 | 5.94 |
| PSMA2              | 6.82 | 7.46 | 6.20 |
| NDUFA7             | 6.82 | 7.06 | 6.45 |
| ABR                | 6.82 | 7.19 | 6.08 |
| HERC2P9            | 6.82 | 7.13 | 6.06 |
| VPS36              | 6.82 | 7.13 | 6.27 |
| KCTD3              | 6.82 | 7.24 | 6.03 |
| PTPLAD1            | 6.82 | 7.42 | 5.61 |
| ATRAID             | 6.82 | 7.07 | 6.57 |
| OTTHUMG00000013474 | 6.82 | 7.29 | 6.37 |
| PCYOX1             | 6.82 | 7.12 | 6.50 |
| PTTG1IP            | 6.82 | 7.55 | 5.79 |
| ABCA5              | 6.82 | 7.37 | 5.59 |
| DLG1               | 6.81 | 7.86 | 5.85 |
| BIVM-ERCC5         | 6.81 | 7.12 | 6.27 |

|                    |      |      |      |
|--------------------|------|------|------|
| NR3C1              | 6.81 | 7.25 | 6.29 |
| DEGS1              | 6.81 | 7.32 | 6.18 |
| RAB14              | 6.81 | 7.27 | 6.27 |
| STYX               | 6.81 | 7.32 | 6.07 |
| GRSF1              | 6.81 | 7.22 | 6.22 |
| RAB1B              | 6.81 | 7.22 | 6.25 |
| MN1                | 6.81 | 7.39 | 6.35 |
| OSBPL8             | 6.81 | 7.40 | 5.96 |
| ORMDL2             | 6.81 | 7.51 | 6.34 |
| FTO                | 6.81 | 7.12 | 6.33 |
| STAG3L3            | 6.81 | 7.16 | 6.62 |
| PGAM4              | 6.81 | 7.20 | 6.32 |
| CSNK1G3            | 6.81 | 7.25 | 6.08 |
| SNAR-G1            | 6.81 | 7.42 | 6.50 |
| OTTHUMG00000177424 | 6.81 | 7.47 | 6.23 |
| VAMP8              | 6.81 | 7.93 | 6.08 |
| CD44               | 6.81 | 7.60 | 5.43 |
| ATM                | 6.81 | 7.21 | 6.33 |
| PITPNA             | 6.81 | 7.25 | 6.17 |
| CAPN7              | 6.81 | 7.26 | 6.41 |
| PHACTR4            | 6.81 | 7.01 | 6.56 |
| WHAMMP1            | 6.80 | 7.20 | 6.29 |
| SOD3               | 6.80 | 7.79 | 6.12 |
| SLC38A6            | 6.80 | 7.40 | 5.81 |
| CCDC117            | 6.80 | 7.13 | 6.45 |
| UBQLN1             | 6.80 | 7.25 | 6.27 |
| SHFM1              | 6.80 | 6.90 | 6.66 |
| OPTN               | 6.80 | 7.33 | 6.21 |
| ANXA6              | 6.80 | 7.14 | 6.28 |
| BIRC6              | 6.80 | 7.18 | 6.25 |
| GTF2IRD2B          | 6.80 | 7.39 | 6.41 |
| MFGE8              | 6.80 | 7.90 | 5.86 |
| AHCYL1             | 6.80 | 7.17 | 6.36 |
| UBA6               | 6.80 | 7.42 | 6.21 |
| KRR1               | 6.80 | 7.15 | 6.44 |
| LEO1               | 6.80 | 7.38 | 5.86 |
| TRPV4              | 6.80 | 7.89 | 6.00 |
| SNX29              | 6.80 | 7.25 | 6.25 |
| PHPT1              | 6.80 | 7.11 | 6.05 |
| ZC3H6              | 6.80 | 7.19 | 6.52 |
| HLA-L              | 6.80 | 7.15 | 6.60 |
| CYB5B              | 6.80 | 7.16 | 6.05 |
| UBE2B              | 6.80 | 7.49 | 6.12 |
| LRRFIP1            | 6.80 | 7.70 | 6.14 |
| DPYSL2             | 6.80 | 7.38 | 5.68 |
| PDLIM5             | 6.80 | 7.18 | 6.09 |
| ANG                | 6.80 | 7.39 | 6.40 |
| PGM5-AS1           | 6.80 | 7.74 | 6.17 |
| NBPF15             | 6.80 | 7.14 | 6.40 |

|              |      |      |      |
|--------------|------|------|------|
| CHD3         | 6.79 | 7.17 | 6.29 |
| RC3H1        | 6.79 | 7.24 | 6.24 |
| TTC37        | 6.79 | 7.41 | 5.86 |
| OAT          | 6.79 | 7.23 | 6.05 |
| RBM14        | 6.79 | 7.02 | 6.44 |
| IGHV4-31     | 6.79 | 7.13 | 6.42 |
| CEMP1        | 6.79 | 7.19 | 6.44 |
| CRLS1        | 6.79 | 7.26 | 6.16 |
| MIR4441      | 6.79 | 7.57 | 6.12 |
| EMC3         | 6.79 | 7.16 | 6.21 |
| RIN2         | 6.79 | 7.67 | 5.67 |
| DAZAP2       | 6.79 | 7.19 | 6.19 |
| PIN1         | 6.79 | 7.15 | 6.53 |
| CRIP1        | 6.79 | 7.20 | 6.40 |
| RB1CC1       | 6.79 | 7.20 | 5.94 |
| ITGA6        | 6.79 | 7.34 | 5.44 |
| PKN2         | 6.79 | 7.13 | 6.18 |
| SERPINB1     | 6.79 | 7.15 | 6.17 |
| RPL37        | 6.79 | 7.13 | 6.42 |
| SAFB         | 6.79 | 6.96 | 6.43 |
| SENP6        | 6.79 | 7.05 | 6.32 |
| VEGFA        | 6.79 | 8.17 | 5.83 |
| MIR4516      | 6.78 | 7.32 | 6.49 |
| FER          | 6.78 | 7.56 | 6.08 |
| URI1         | 6.78 | 7.24 | 6.11 |
| IBTK         | 6.78 | 7.20 | 6.47 |
| ATG3         | 6.78 | 7.21 | 6.28 |
| FAM192A      | 6.78 | 7.20 | 6.09 |
| LTV1         | 6.78 | 7.31 | 6.06 |
| CEP95        | 6.78 | 7.20 | 6.31 |
| OXT          | 6.78 | 7.18 | 6.51 |
| GAGE12G      | 6.78 | 7.26 | 6.08 |
| PPP3CB       | 6.78 | 7.16 | 6.25 |
| NDUFB6       | 6.78 | 7.47 | 5.89 |
| NPHP3-ACAD11 | 6.78 | 7.35 | 6.29 |
| TOR1AIP1     | 6.78 | 7.06 | 6.39 |
| MT4          | 6.78 | 7.20 | 6.51 |
| SIK2         | 6.78 | 7.30 | 6.11 |
| AIF1         | 6.78 | 8.02 | 5.80 |
| VDAC3        | 6.78 | 7.32 | 6.14 |
| CDC123       | 6.78 | 7.20 | 6.20 |
| TBC1D3H      | 6.78 | 7.02 | 6.55 |
| SBSPON       | 6.78 | 8.13 | 5.76 |
| LOC541473    | 6.78 | 7.39 | 6.08 |
| CUL1         | 6.78 | 7.17 | 6.01 |
| MIR941-1     | 6.78 | 7.12 | 6.24 |
| TNXB         | 6.78 | 7.45 | 5.92 |
| ARID1B       | 6.78 | 6.93 | 6.51 |
| PDLIM1       | 6.78 | 7.12 | 6.21 |

|                    |      |      |      |
|--------------------|------|------|------|
| WTAP               | 6.78 | 7.09 | 6.22 |
| CRISPLD2           | 6.78 | 8.53 | 5.44 |
| FLOT1              | 6.77 | 7.09 | 6.36 |
| EIF5B              | 6.77 | 7.30 | 6.00 |
| MIR127             | 6.77 | 7.21 | 6.37 |
| HLA-DPA1           | 6.77 | 7.77 | 5.94 |
| OS9                | 6.77 | 7.09 | 6.49 |
| ZCCHC7             | 6.77 | 7.03 | 6.39 |
| CHMP2A             | 6.77 | 7.00 | 6.28 |
| SNRNP27            | 6.77 | 7.19 | 6.32 |
| RYK                | 6.77 | 7.18 | 6.30 |
| DNAJA1             | 6.77 | 7.22 | 6.07 |
| DDOST              | 6.77 | 7.16 | 6.09 |
| RNF24              | 6.77 | 7.22 | 6.14 |
| MIR1302-11         | 6.77 | 7.71 | 6.26 |
| VIT                | 6.77 | 8.19 | 4.80 |
| NAV1               | 6.77 | 7.50 | 6.09 |
| LINC00686          | 6.77 | 7.03 | 6.46 |
| CREB3L2            | 6.77 | 7.37 | 6.43 |
| DPP4               | 6.77 | 8.11 | 4.94 |
| AIMP2              | 6.76 | 7.16 | 6.21 |
| RPL8               | 6.76 | 6.91 | 6.59 |
| OTTHUMG00000016713 | 6.76 | 7.29 | 6.32 |
| NDUFB11            | 6.76 | 7.30 | 6.36 |
| SNAR-D             | 6.76 | 7.54 | 6.19 |
| ARHGDIG            | 6.76 | 7.08 | 6.36 |
| ZMYM6              | 6.76 | 7.08 | 6.19 |
| LINC00493          | 6.76 | 7.34 | 6.26 |
| MIR4519            | 6.76 | 7.40 | 6.46 |
| TIMMDC1            | 6.76 | 7.04 | 6.23 |
| NOMO1              | 6.76 | 7.13 | 5.98 |
| NFAT5              | 6.76 | 7.06 | 6.41 |
| SPTSSA             | 6.76 | 7.34 | 6.13 |
| FAM138C            | 6.76 | 7.40 | 6.42 |
| LRIG3              | 6.76 | 7.20 | 6.01 |
| NSRP1              | 6.76 | 7.09 | 6.33 |
| ARIH1              | 6.76 | 7.09 | 6.25 |
| UHRF1BP1L          | 6.76 | 7.31 | 6.14 |
| FAM103A1           | 6.76 | 7.29 | 6.06 |
| SUPT16H            | 6.76 | 7.19 | 6.13 |
| CNN3               | 6.76 | 7.17 | 6.33 |
| PFDN5              | 6.76 | 7.02 | 6.46 |
| PIGK               | 6.76 | 7.37 | 6.26 |
| EIF4G3             | 6.76 | 7.03 | 6.14 |
| ZDHHC6             | 6.76 | 7.07 | 6.23 |
| S100A4             | 6.76 | 7.39 | 6.22 |
| AMFR               | 6.76 | 7.32 | 5.81 |
| TGFB2              | 6.76 | 7.64 | 5.41 |
| JUNB               | 6.75 | 7.58 | 5.94 |

|           |      |      |      |
|-----------|------|------|------|
| ATXN2L    | 6.75 | 7.06 | 6.41 |
| LOX       | 6.75 | 7.96 | 5.67 |
| TUFM      | 6.75 | 7.08 | 6.26 |
| SEC61A1   | 6.75 | 7.52 | 6.17 |
| AKAP9     | 6.75 | 7.16 | 6.17 |
| MIR103B2  | 6.75 | 7.18 | 5.99 |
| VCP       | 6.75 | 7.14 | 6.28 |
| CORO1C    | 6.75 | 7.49 | 5.79 |
| MAPK1     | 6.75 | 7.20 | 5.95 |
| DHX36     | 6.75 | 7.10 | 6.13 |
| PHB2      | 6.75 | 7.21 | 6.35 |
| ZNF250    | 6.75 | 7.24 | 6.43 |
| AEBP1     | 6.75 | 7.54 | 6.10 |
| PYCARD    | 6.75 | 7.25 | 6.07 |
| AKAP13    | 6.75 | 7.26 | 5.94 |
| UBR2      | 6.75 | 7.10 | 6.10 |
| LRP6      | 6.75 | 7.16 | 6.20 |
| SPDYE1    | 6.75 | 7.14 | 6.20 |
| ZFR       | 6.75 | 7.22 | 6.16 |
| LIMCH1    | 6.75 | 7.19 | 6.08 |
| CHMP1B    | 6.75 | 7.26 | 5.76 |
| DCAF16    | 6.74 | 6.99 | 6.28 |
| PHACTR2   | 6.74 | 7.07 | 6.03 |
| MYL4      | 6.74 | 7.57 | 5.95 |
| AMZ2      | 6.74 | 7.09 | 6.12 |
| CENPC1    | 6.74 | 7.38 | 6.24 |
| MIR1202   | 6.74 | 7.26 | 6.44 |
| TMEM126B  | 6.74 | 7.12 | 5.82 |
| KCNA6     | 6.74 | 7.49 | 6.22 |
| SNORA42   | 6.74 | 7.32 | 6.11 |
| SUMO3     | 6.74 | 7.06 | 6.50 |
| CCSER2    | 6.74 | 7.06 | 6.32 |
| LOC647264 | 6.74 | 7.52 | 6.03 |
| RAB31     | 6.74 | 7.89 | 5.35 |
| KDM3A     | 6.74 | 7.32 | 6.33 |
| LNPEP     | 6.74 | 7.27 | 6.13 |
| TXNDC11   | 6.74 | 7.05 | 6.19 |
| DNAJB11   | 6.73 | 7.38 | 6.17 |
| ABHD2     | 6.73 | 7.94 | 5.63 |
| NAA35     | 6.73 | 6.98 | 6.09 |
| SEPT11    | 6.73 | 7.38 | 5.31 |
| KLK11     | 6.73 | 7.19 | 6.17 |
| UFL1      | 6.73 | 7.02 | 6.22 |
| ARPC1A    | 6.73 | 7.08 | 6.21 |
| TMEM230   | 6.73 | 7.07 | 6.23 |
| GBP2      | 6.73 | 7.67 | 6.38 |
| SWAP70    | 6.73 | 7.07 | 6.30 |
| HECTD2    | 6.73 | 7.27 | 6.24 |
| PAFAH1B2  | 6.73 | 7.01 | 6.40 |



|                 |      |      |      |
|-----------------|------|------|------|
| IST1            | 6.73 | 7.08 | 5.90 |
| CTF1            | 6.73 | 7.09 | 6.47 |
| LOC654342       | 6.73 | 7.85 | 5.72 |
| LOC100506735    | 6.73 | 7.18 | 6.35 |
| TNXA            | 6.73 | 7.38 | 5.36 |
| KLF10           | 6.73 | 7.48 | 5.84 |
| TENC1           | 6.73 | 7.20 | 6.23 |
| LOC440300       | 6.73 | 7.34 | 6.07 |
| ZNF25           | 6.73 | 7.33 | 6.18 |
| COL11A2         | 6.72 | 7.19 | 5.82 |
| MRPS16          | 6.72 | 7.08 | 6.35 |
| ARPC4           | 6.72 | 6.95 | 6.02 |
| DDAH2           | 6.72 | 7.13 | 6.40 |
| MIB1            | 6.72 | 7.29 | 5.94 |
| TMEM147         | 6.72 | 6.93 | 6.36 |
| SIPA1L1         | 6.72 | 7.21 | 6.04 |
| SLC17A5         | 6.72 | 7.51 | 5.69 |
| KIF13B          | 6.72 | 7.33 | 5.50 |
| FGD5-AS1        | 6.72 | 7.06 | 6.21 |
| XAF1            | 6.72 | 7.65 | 6.31 |
| RBM12           | 6.72 | 7.11 | 5.97 |
| ADAM17          | 6.72 | 7.31 | 5.86 |
| RBM25           | 6.72 | 7.00 | 6.11 |
| TOP1            | 6.72 | 7.05 | 5.87 |
| PTPN12          | 6.72 | 7.12 | 5.86 |
| C1QBP           | 6.72 | 7.11 | 6.14 |
| FXR1            | 6.72 | 7.13 | 6.23 |
| SNORD114-19     | 6.72 | 8.24 | 4.60 |
| KDM5B           | 6.72 | 7.34 | 6.20 |
| NIF3L1          | 6.72 | 7.24 | 6.19 |
| HERC1           | 6.72 | 6.99 | 6.21 |
| EHD2            | 6.72 | 7.41 | 5.99 |
| EBF1            | 6.72 | 7.49 | 5.74 |
| TTC1            | 6.72 | 7.23 | 5.83 |
| SSR3            | 6.72 | 7.25 | 6.08 |
| WAC             | 6.72 | 7.09 | 6.36 |
| AP1G1           | 6.72 | 7.16 | 5.94 |
| RBM4B           | 6.72 | 6.94 | 6.10 |
| SRSF2           | 6.72 | 7.10 | 5.98 |
| ALOX5AP         | 6.72 | 7.69 | 5.62 |
| JAK2            | 6.71 | 7.07 | 6.22 |
| ANKHD1-EIF4EBP3 | 6.71 | 7.03 | 6.23 |
| FZD8            | 6.71 | 7.31 | 6.12 |
| KLF6            | 6.71 | 7.37 | 6.00 |
| MIR3670-1       | 6.71 | 7.18 | 6.20 |
| DCAF6           | 6.71 | 7.06 | 6.36 |
| PDS5A           | 6.71 | 7.16 | 6.12 |
| PRDX3           | 6.71 | 7.13 | 6.11 |
| QKI             | 6.71 | 7.04 | 5.89 |

|           |      |      |      |
|-----------|------|------|------|
| MAP4K5    | 6.71 | 7.29 | 6.24 |
| PARP6     | 6.71 | 7.25 | 5.89 |
| DSTN      | 6.71 | 6.91 | 6.28 |
| RABGAP1   | 6.71 | 7.15 | 6.00 |
| TMLHE     | 6.71 | 7.07 | 5.88 |
| AQP1      | 6.71 | 7.55 | 5.67 |
| MIR661    | 6.71 | 7.51 | 6.37 |
| PLXDC1    | 6.71 | 7.47 | 6.02 |
| PXDN      | 6.71 | 7.74 | 5.62 |
| GOLGA8G   | 6.71 | 7.02 | 6.39 |
| IGHV3-13  | 6.71 | 7.75 | 6.24 |
| ISM1-AS1  | 6.71 | 7.92 | 5.48 |
| MIR3676   | 6.70 | 7.03 | 6.23 |
| SLCO2A1   | 6.70 | 7.89 | 5.12 |
| FOXO1     | 6.70 | 7.05 | 6.25 |
| SERPINE1  | 6.70 | 8.43 | 5.31 |
| SDHAP1    | 6.70 | 7.10 | 6.15 |
| INE2      | 6.70 | 7.74 | 5.16 |
| GAGE12J   | 6.70 | 7.38 | 6.04 |
| KIAA0430  | 6.70 | 7.14 | 6.19 |
| MRPS28    | 6.70 | 7.03 | 6.07 |
| POLR2J2   | 6.70 | 7.23 | 6.05 |
| RPS15A    | 6.70 | 7.20 | 6.00 |
| ZEB1      | 6.70 | 7.47 | 5.85 |
| ADAMTS2   | 6.70 | 7.80 | 5.30 |
| LZIC      | 6.70 | 7.17 | 6.13 |
| TMEM57    | 6.70 | 7.22 | 5.91 |
| ATP6AP1   | 6.70 | 7.00 | 6.44 |
| TRIM44    | 6.70 | 7.04 | 6.25 |
| RABEP1    | 6.70 | 7.09 | 6.28 |
| S100A10   | 6.70 | 7.57 | 5.99 |
| SCAMP2    | 6.70 | 7.20 | 6.23 |
| REXO2     | 6.70 | 7.27 | 6.32 |
| HCFC1R1   | 6.70 | 7.17 | 6.26 |
| NEK1      | 6.70 | 7.03 | 6.45 |
| KIAA0100  | 6.70 | 7.09 | 6.18 |
| FLJ39739  | 6.70 | 6.91 | 6.40 |
| WASH5P    | 6.70 | 7.06 | 6.16 |
| NMT1      | 6.70 | 7.07 | 6.21 |
| TMEM14C   | 6.70 | 7.01 | 6.36 |
| ASF1A     | 6.70 | 7.18 | 6.11 |
| FAM99B    | 6.69 | 7.07 | 6.40 |
| ATP5D     | 6.69 | 7.02 | 6.20 |
| C14orf166 | 6.69 | 7.33 | 6.00 |
| ELP3      | 6.69 | 6.90 | 6.45 |
| ENG       | 6.69 | 7.15 | 6.25 |
| MIR548AL  | 6.69 | 7.37 | 6.08 |
| NEO1      | 6.69 | 7.17 | 6.09 |
| MIR3143   | 6.69 | 6.96 | 6.44 |

|                    |      |      |      |
|--------------------|------|------|------|
| ENO1               | 6.69 | 7.89 | 5.88 |
| ERG                | 6.69 | 7.11 | 5.98 |
| RBBP7              | 6.69 | 7.11 | 6.15 |
| OTTHUMG00000168788 | 6.69 | 7.39 | 5.57 |
| RNF13              | 6.69 | 7.03 | 6.17 |
| COA3               | 6.69 | 7.12 | 5.93 |
| COLGALT2           | 6.69 | 7.74 | 5.63 |
| TIMM23             | 6.69 | 7.28 | 6.18 |
| GNS                | 6.69 | 7.13 | 6.02 |
| MYL6               | 6.69 | 6.89 | 6.29 |
| PACSIN2            | 6.69 | 7.06 | 6.28 |
| ENPP2              | 6.69 | 7.31 | 6.12 |
| PITRM1             | 6.69 | 7.14 | 6.12 |
| OTTHUMG00000161847 | 6.69 | 7.74 | 6.20 |
| MPC1               | 6.68 | 6.95 | 6.44 |
| HSPA4              | 6.68 | 7.10 | 5.98 |
| SRGAP2             | 6.68 | 7.19 | 6.08 |
| LOC100134868       | 6.68 | 7.23 | 6.14 |
| UPF3A              | 6.68 | 7.12 | 6.33 |
| RNA5SP199          | 6.68 | 7.08 | 6.32 |
| JKAMP              | 6.68 | 7.03 | 6.18 |
| MIR4518            | 6.68 | 7.45 | 5.99 |
| SNAR-I             | 6.68 | 7.22 | 6.18 |
| EZR                | 6.68 | 7.55 | 5.41 |
| GABRA4             | 6.68 | 8.27 | 5.86 |
| NBPF12             | 6.68 | 7.01 | 6.06 |
| KRTAP10-9          | 6.68 | 7.01 | 6.32 |
| NF1                | 6.68 | 7.07 | 6.11 |
| FNBP1              | 6.68 | 7.08 | 5.79 |
| CDK5RAP3           | 6.68 | 7.01 | 6.29 |
| SIRPA              | 6.68 | 7.15 | 6.25 |
| MPDZ               | 6.68 | 7.07 | 6.32 |
| ACLY               | 6.68 | 7.44 | 5.78 |
| UBXN6              | 6.67 | 7.03 | 6.05 |
| MIR3150A           | 6.67 | 7.23 | 6.25 |
| UBA1               | 6.67 | 7.15 | 6.20 |
| HNMT               | 6.67 | 7.11 | 6.14 |
| NPIP6              | 6.67 | 7.10 | 6.11 |
| CTNND1             | 6.67 | 6.91 | 6.08 |
| ORMDL1             | 6.67 | 7.12 | 6.00 |
| NDUFA13            | 6.67 | 7.25 | 6.31 |
| TSPO               | 6.67 | 6.99 | 6.13 |
| MYO1C              | 6.67 | 7.11 | 5.72 |
| ASCC3              | 6.67 | 7.06 | 6.06 |
| DDX24              | 6.67 | 7.01 | 6.24 |
| EFR3A              | 6.67 | 7.20 | 5.86 |
| SNRPD1             | 6.67 | 7.42 | 5.81 |
| ATP6V1G2-DDX39B    | 6.67 | 6.94 | 6.35 |
| MEDAG              | 6.67 | 7.69 | 5.21 |

|              |      |      |      |
|--------------|------|------|------|
| LOC100132352 | 6.67 | 7.23 | 5.96 |
| SHMT2        | 6.67 | 7.06 | 6.16 |
| CPNE2        | 6.67 | 7.08 | 6.24 |
| ATP6V0A1     | 6.67 | 7.01 | 5.97 |
| SRPR         | 6.67 | 7.00 | 6.24 |
| CDR2         | 6.67 | 7.24 | 5.94 |
| DUX4L9       | 6.67 | 7.20 | 6.01 |
| PTCHD3P1     | 6.67 | 6.96 | 6.29 |
| PLAUR        | 6.67 | 8.18 | 5.64 |
| MTR          | 6.67 | 6.95 | 6.02 |
| MTMR11       | 6.67 | 6.88 | 6.44 |
| DPY30        | 6.67 | 7.16 | 6.12 |
| MALL         | 6.67 | 7.31 | 6.22 |
| PSMD13       | 6.67 | 7.06 | 6.31 |
| USP47        | 6.67 | 7.21 | 5.96 |
| ZBED5        | 6.67 | 6.91 | 6.34 |
| MRPS18A      | 6.66 | 6.96 | 6.17 |
| ZNF767       | 6.66 | 7.09 | 6.11 |
| GOLGA8CP     | 6.66 | 6.96 | 6.35 |
| CFB          | 6.66 | 7.14 | 6.08 |
| KIAA1598     | 6.66 | 6.97 | 6.07 |
| RPL23AP82    | 6.66 | 6.97 | 6.26 |
| NEBL         | 6.66 | 7.40 | 5.93 |
| POLI         | 6.66 | 7.08 | 6.18 |
| DAP          | 6.66 | 7.09 | 6.31 |
| ZKSCAN1      | 6.66 | 7.22 | 6.30 |
| PIAS1        | 6.66 | 7.05 | 6.30 |
| ZNF652       | 6.66 | 6.96 | 5.93 |
| DCUN1D1      | 6.66 | 7.03 | 6.01 |
| SLC35G5      | 6.66 | 7.78 | 6.07 |
| MRFAP1       | 6.66 | 7.02 | 6.06 |
| PANK3        | 6.66 | 7.36 | 5.82 |
| PPA1         | 6.66 | 6.93 | 6.13 |
| RUFY3        | 6.66 | 7.08 | 5.89 |
| NUB1         | 6.66 | 6.88 | 6.29 |
| MIR3689E     | 6.66 | 7.91 | 5.73 |
| C2orf15      | 6.65 | 7.12 | 6.32 |
| WDR33        | 6.65 | 7.11 | 6.28 |
| FAM168A      | 6.65 | 7.11 | 6.38 |
| MED10        | 6.65 | 7.34 | 5.95 |
| NDUFA8       | 6.65 | 7.09 | 6.11 |
| MUC1         | 6.65 | 7.39 | 5.44 |
| MIR571       | 6.65 | 7.13 | 6.32 |
| NDRG2        | 6.65 | 7.49 | 5.71 |
| KIAA1109     | 6.65 | 7.02 | 6.12 |
| INHBA        | 6.65 | 7.73 | 5.19 |
| GOLGA8F      | 6.65 | 7.00 | 6.37 |
| NFATC2       | 6.65 | 7.18 | 5.60 |
| SASH1        | 6.65 | 6.99 | 6.25 |

|                    |      |      |      |
|--------------------|------|------|------|
| CEP112             | 6.65 | 6.98 | 6.10 |
| OTTHUMG00000001097 | 6.65 | 6.80 | 6.28 |
| VKORC1L1           | 6.65 | 7.40 | 6.04 |
| ZNF148             | 6.65 | 7.10 | 5.90 |
| SYNJ2BP-COX16      | 6.64 | 7.17 | 6.12 |
| ATP10D             | 6.64 | 6.97 | 6.34 |
| HOXA5              | 6.64 | 7.14 | 6.02 |
| GGTLC2             | 6.64 | 7.41 | 6.30 |
| TAOK1              | 6.64 | 7.16 | 5.70 |
| UBE2J1             | 6.64 | 7.39 | 6.02 |
| NBR1               | 6.64 | 7.03 | 6.16 |
| EIF2B1             | 6.64 | 6.96 | 5.89 |
| SCIN               | 6.64 | 7.41 | 5.53 |
| POLR3K             | 6.64 | 7.11 | 6.27 |
| MIR646             | 6.64 | 7.00 | 6.07 |
| PDXDC2P            | 6.64 | 6.99 | 5.83 |
| MOCS2              | 6.64 | 6.93 | 6.20 |
| MAPKAP1            | 6.64 | 6.94 | 6.22 |
| MKRN2              | 6.64 | 6.94 | 6.35 |
| USP36              | 6.64 | 6.84 | 6.21 |
| CUL4A              | 6.64 | 7.02 | 5.73 |
| SFXN3              | 6.64 | 7.00 | 6.20 |
| TBC1D15            | 6.64 | 6.97 | 6.10 |
| PDIA4              | 6.64 | 7.12 | 6.11 |
| CHST6              | 6.64 | 7.53 | 5.93 |
| CLPTM1             | 6.64 | 7.20 | 6.22 |
| OTTHUMG00000032220 | 6.64 | 7.12 | 6.22 |
| UBE2V1             | 6.64 | 6.92 | 6.30 |
| PTPRD              | 6.64 | 7.52 | 5.10 |
| KAT2B              | 6.63 | 7.24 | 6.08 |
| RUFY2              | 6.63 | 6.96 | 6.06 |
| COX7A2             | 6.63 | 6.98 | 6.22 |
| SLC35F5            | 6.63 | 7.31 | 5.67 |
| KLF2               | 6.63 | 7.09 | 6.38 |
| HSPG2              | 6.63 | 6.85 | 6.13 |
| EZH1               | 6.63 | 7.05 | 5.95 |
| NARR               | 6.63 | 6.99 | 6.29 |
| GOLGA3             | 6.63 | 7.03 | 6.36 |
| SDHD               | 6.63 | 6.88 | 6.23 |
| LOC100287098       | 6.63 | 6.97 | 6.30 |
| GANAB              | 6.63 | 7.04 | 6.10 |
| NHLRC3             | 6.63 | 7.08 | 6.08 |
| C19orf70           | 6.63 | 6.95 | 6.16 |
| KRTAP10-10         | 6.63 | 7.17 | 6.20 |
| ITGB5              | 6.63 | 7.11 | 5.66 |
| NRBP1              | 6.63 | 7.03 | 5.91 |
| PHKB               | 6.63 | 7.06 | 6.00 |
| SEMA3E             | 6.63 | 7.61 | 5.22 |
| DDX50              | 6.63 | 7.10 | 6.22 |

|                    |      |      |      |
|--------------------|------|------|------|
| HLF                | 6.63 | 7.58 | 5.61 |
| BAG6               | 6.63 | 6.84 | 6.19 |
| REST               | 6.63 | 6.94 | 6.03 |
| LDB1               | 6.62 | 6.94 | 6.07 |
| ZC3H14             | 6.62 | 6.86 | 6.24 |
| DYNLT3             | 6.62 | 7.15 | 5.95 |
| DOCK1              | 6.62 | 7.05 | 6.01 |
| UBE4A              | 6.62 | 7.11 | 6.24 |
| GAGE12C            | 6.62 | 7.22 | 5.82 |
| ANKRD36B           | 6.62 | 7.10 | 5.95 |
| PAIP2              | 6.62 | 6.94 | 6.29 |
| RBM8A              | 6.62 | 6.86 | 6.29 |
| UGGT1              | 6.62 | 7.00 | 6.26 |
| SLC9A3R1           | 6.62 | 7.00 | 5.98 |
| NR2C2              | 6.62 | 6.86 | 6.02 |
| MDP1               | 6.62 | 6.98 | 6.29 |
| CGB8               | 6.62 | 7.41 | 6.10 |
| TOB1               | 6.62 | 7.09 | 5.82 |
| KNOP1              | 6.62 | 7.02 | 6.13 |
| CUTC               | 6.62 | 7.08 | 5.94 |
| TNNT3              | 6.62 | 7.39 | 5.92 |
| PGM3               | 6.62 | 7.09 | 5.99 |
| SUPT7L             | 6.62 | 6.84 | 6.14 |
| TGOLN2             | 6.62 | 7.00 | 6.22 |
| ARF3               | 6.62 | 6.85 | 6.29 |
| LGALS3             | 6.62 | 6.90 | 6.15 |
| ERGIC3             | 6.62 | 6.87 | 6.40 |
| SIN3A              | 6.62 | 7.05 | 6.21 |
| OTTHUMG00000183874 | 6.62 | 7.23 | 5.96 |
| MARS               | 6.62 | 6.93 | 6.03 |
| ANGPTL5            | 6.62 | 7.25 | 6.03 |
| SNORA5A            | 6.62 | 7.06 | 5.89 |
| OR4N4              | 6.62 | 7.64 | 6.00 |
| SNIP1              | 6.62 | 6.90 | 6.39 |
| AARS               | 6.62 | 7.27 | 6.13 |
| OTTHUMG00000169612 | 6.62 | 7.05 | 6.11 |
| PROS1              | 6.62 | 7.03 | 5.95 |
| RALB               | 6.62 | 7.41 | 5.80 |
| OTTHUMG00000059509 | 6.62 | 7.16 | 5.99 |
| RGS16              | 6.62 | 7.41 | 6.10 |
| LINC00173          | 6.62 | 7.73 | 5.29 |
| SERF1A             | 6.61 | 6.85 | 6.34 |
| ISOC2              | 6.61 | 6.91 | 6.21 |
| MIR557             | 6.61 | 7.50 | 6.06 |
| TMEM208            | 6.61 | 7.52 | 5.57 |
| LOC100507672       | 6.61 | 7.39 | 6.20 |
| C6orf70            | 6.61 | 7.12 | 5.94 |
| DNAJC19            | 6.61 | 6.88 | 6.04 |
| PREPL              | 6.61 | 7.17 | 6.00 |

|          |      |      |      |
|----------|------|------|------|
| SRGAP2C  | 6.61 | 7.00 | 6.07 |
| TAB3-AS2 | 6.61 | 7.11 | 6.10 |
| TPP1     | 6.61 | 7.09 | 6.08 |
| SAP130   | 6.61 | 7.01 | 5.98 |
| GPATCH8  | 6.61 | 7.10 | 6.18 |
| CNOT3    | 6.61 | 6.85 | 6.31 |
| YES1     | 6.61 | 7.12 | 5.70 |
| CDV3     | 6.61 | 7.14 | 6.02 |
| SCAF4    | 6.61 | 7.01 | 6.24 |
| SBNO1    | 6.61 | 7.18 | 5.89 |
| XPR1     | 6.61 | 7.09 | 5.90 |
| ATF1     | 6.61 | 6.95 | 5.96 |
| ENTPD4   | 6.61 | 7.13 | 6.07 |
| NPEPPS   | 6.61 | 7.02 | 6.14 |
| FOXJ2    | 6.61 | 7.00 | 6.04 |
| SMU1     | 6.61 | 7.19 | 5.84 |
| GLUL     | 6.61 | 7.02 | 5.92 |
| HSPH1    | 6.61 | 7.85 | 5.53 |
| STAU1    | 6.61 | 7.00 | 5.79 |
| RHOJ     | 6.61 | 7.19 | 6.18 |
| KIAA1468 | 6.61 | 6.81 | 6.32 |
| TGFB1    | 6.61 | 7.06 | 5.92 |
| LPCAT3   | 6.61 | 6.97 | 6.16 |
| CCT3     | 6.61 | 7.10 | 5.69 |
| MYO9A    | 6.61 | 6.90 | 6.17 |
| SERPINA1 | 6.61 | 7.11 | 5.94 |
| RPL35A   | 6.61 | 6.90 | 6.40 |
| ICT1     | 6.61 | 7.01 | 5.82 |
| DENND4A  | 6.61 | 7.00 | 6.12 |
| FAM49A   | 6.60 | 7.20 | 5.55 |
| NAA38    | 6.60 | 7.05 | 6.18 |
| FBLN1    | 6.60 | 7.30 | 6.03 |
| MAP3K7   | 6.60 | 6.95 | 5.95 |
| USP3     | 6.60 | 7.06 | 6.24 |
| CYP2A7   | 6.60 | 7.35 | 6.08 |
| CD97     | 6.60 | 7.60 | 5.36 |
| TIMM13   | 6.60 | 7.29 | 6.03 |
| NCSTN    | 6.60 | 6.89 | 6.25 |
| TAB1     | 6.60 | 6.92 | 6.20 |
| CTNNA1   | 6.60 | 7.06 | 5.75 |
| CALD1    | 6.60 | 7.15 | 6.02 |
| YPEL3    | 6.60 | 7.11 | 5.99 |
| SSB      | 6.60 | 6.94 | 6.26 |
| METTL7A  | 6.60 | 7.20 | 5.15 |
| ETF1     | 6.60 | 7.08 | 6.09 |
| HAS2     | 6.60 | 7.10 | 6.01 |
| SOS2     | 6.60 | 7.09 | 5.96 |
| FBXL4    | 6.60 | 6.96 | 5.99 |
| CLIP1    | 6.60 | 6.90 | 6.04 |

|               |      |      |      |
|---------------|------|------|------|
| RALGAPB       | 6.60 | 6.85 | 5.81 |
| SPG11         | 6.60 | 6.90 | 6.00 |
| APOA1BP       | 6.60 | 7.01 | 5.93 |
| TDRD3         | 6.60 | 6.81 | 6.07 |
| EXT1          | 6.60 | 7.14 | 5.82 |
| XBP1          | 6.60 | 7.05 | 6.06 |
| GPX3          | 6.60 | 7.65 | 5.77 |
| CEBPZ         | 6.60 | 6.92 | 5.85 |
| SMIM15        | 6.60 | 7.20 | 6.06 |
| KIAA2026      | 6.60 | 6.94 | 6.24 |
| ZNF667-AS1    | 6.60 | 7.03 | 6.15 |
| SMARCAD1      | 6.60 | 7.05 | 6.00 |
| TRAK2         | 6.59 | 7.40 | 5.68 |
| MIR604        | 6.59 | 6.96 | 6.07 |
| PDHB          | 6.59 | 6.97 | 5.91 |
| PIIP5K2       | 6.59 | 7.17 | 6.17 |
| WBSCR16       | 6.59 | 6.79 | 6.23 |
| PPIL4         | 6.59 | 6.92 | 6.00 |
| RNA5SP486     | 6.59 | 6.95 | 6.11 |
| TRIM25        | 6.59 | 6.95 | 6.05 |
| EVC           | 6.59 | 7.13 | 6.17 |
| LINC00957     | 6.59 | 7.18 | 6.03 |
| SEC24C        | 6.59 | 6.80 | 6.41 |
| OSTF1         | 6.59 | 7.08 | 6.15 |
| RABGEF1       | 6.59 | 7.14 | 6.04 |
| IFITM3        | 6.59 | 6.96 | 5.92 |
| COMMD7        | 6.59 | 7.01 | 6.01 |
| PRKRIP1       | 6.59 | 6.93 | 6.17 |
| CDC16         | 6.59 | 6.83 | 6.05 |
| FRS2          | 6.59 | 7.18 | 5.70 |
| RNPS1         | 6.59 | 7.00 | 5.68 |
| TMOD1         | 6.59 | 7.61 | 5.81 |
| MORN2         | 6.59 | 7.15 | 6.04 |
| MYO1E         | 6.59 | 7.32 | 5.92 |
| HLA-G         | 6.59 | 6.98 | 6.23 |
| YIPF3         | 6.59 | 7.04 | 5.69 |
| SUPT6H        | 6.59 | 6.93 | 6.01 |
| TMEM88B       | 6.59 | 6.87 | 6.34 |
| GPX1          | 6.59 | 7.19 | 6.08 |
| GTF2IRD1P1    | 6.59 | 7.14 | 6.13 |
| HLA-F         | 6.59 | 6.84 | 6.32 |
| SLX1A-SULT1A3 | 6.59 | 6.97 | 6.41 |
| H19           | 6.59 | 7.51 | 5.76 |
| MPHOSPH8      | 6.58 | 7.00 | 6.04 |
| MRPL21        | 6.58 | 6.85 | 6.10 |
| COPS7A        | 6.58 | 6.80 | 6.33 |
| SUN1          | 6.58 | 7.17 | 5.87 |
| FTH1P3        | 6.58 | 6.85 | 6.30 |
| FLJ32255      | 6.58 | 6.96 | 6.08 |



|             |      |      |      |
|-------------|------|------|------|
| SECISBP2    | 6.58 | 6.80 | 6.25 |
| TNPO2       | 6.58 | 6.99 | 5.97 |
| MIR98       | 6.58 | 7.15 | 5.84 |
| GAGE2A      | 6.58 | 7.24 | 5.80 |
| C16orf62    | 6.58 | 6.83 | 6.10 |
| TAF10       | 6.58 | 6.94 | 5.98 |
| MIR324      | 6.58 | 7.43 | 5.90 |
| STARD9      | 6.58 | 6.87 | 6.23 |
| MIR103A2    | 6.58 | 7.02 | 6.13 |
| NUP153      | 6.58 | 7.19 | 5.57 |
| SNORD114-14 | 6.58 | 7.70 | 5.60 |
| TIMM10      | 6.58 | 6.84 | 6.02 |
| HS2ST1      | 6.58 | 7.29 | 6.07 |
| SPECC1L     | 6.58 | 7.07 | 6.07 |
| CLCF1       | 6.58 | 6.77 | 6.42 |
| COX15       | 6.58 | 6.94 | 6.24 |
| HECTD1      | 6.58 | 6.94 | 6.12 |
| WHAMMP3     | 6.58 | 6.86 | 6.27 |
| HAGH        | 6.58 | 6.93 | 6.03 |
| HMOX1       | 6.57 | 7.19 | 5.49 |
| TECR        | 6.57 | 6.90 | 6.16 |
| STT3B       | 6.57 | 7.01 | 6.08 |
| CD93        | 6.57 | 6.96 | 5.96 |
| ZNF326      | 6.57 | 6.90 | 6.17 |
| CALCOCO2    | 6.57 | 6.78 | 6.40 |
| ACP1        | 6.57 | 7.12 | 5.89 |
| USP4        | 6.57 | 7.01 | 5.75 |
| PEA15       | 6.57 | 7.23 | 5.88 |
| TPGS2       | 6.57 | 7.23 | 5.72 |
| UBE2Z       | 6.57 | 7.10 | 6.00 |
| PRPF3       | 6.57 | 6.92 | 6.13 |
| POLDIP3     | 6.57 | 7.04 | 5.97 |
| RNF10       | 6.57 | 6.84 | 6.26 |
| NOL7        | 6.57 | 6.92 | 6.04 |
| WSB2        | 6.57 | 7.20 | 5.98 |
| PSMA4       | 6.57 | 6.97 | 5.82 |
| WAPAL       | 6.57 | 7.05 | 5.96 |
| PTBP1       | 6.57 | 7.17 | 5.64 |
| MANBA       | 6.57 | 6.87 | 6.12 |
| DDA1        | 6.56 | 6.97 | 5.78 |
| DIAPH2      | 6.56 | 7.12 | 5.81 |
| ALDH18A1    | 6.56 | 7.11 | 5.90 |
| DENND5A     | 6.56 | 7.11 | 5.70 |
| GAGE13      | 6.56 | 7.14 | 6.01 |
| FAR1        | 6.56 | 7.19 | 5.94 |
| GTF2IRD2    | 6.56 | 6.82 | 6.27 |
| MRPL37      | 6.56 | 7.06 | 5.96 |
| SPIRE1      | 6.56 | 7.08 | 5.96 |
| ANAPC11     | 6.56 | 7.25 | 5.92 |

|                    |      |      |      |
|--------------------|------|------|------|
| KIAA1586           | 6.56 | 7.12 | 5.91 |
| C16orf13           | 6.56 | 6.98 | 6.15 |
| SEL1L              | 6.56 | 7.14 | 5.75 |
| SHPRH              | 6.56 | 6.85 | 6.16 |
| HCG11              | 6.56 | 6.79 | 6.13 |
| IGK                | 6.56 | 7.76 | 5.44 |
| DNM1L              | 6.56 | 7.05 | 5.96 |
| C12orf57           | 6.56 | 6.91 | 6.17 |
| ATP6V0CP3          | 6.56 | 7.41 | 6.07 |
| MICB               | 6.56 | 6.83 | 6.29 |
| LIMA1              | 6.56 | 7.07 | 5.82 |
| GBE1               | 6.56 | 6.93 | 5.89 |
| MICA               | 6.56 | 7.00 | 6.13 |
| SCAPER             | 6.56 | 6.88 | 6.02 |
| UFC1               | 6.56 | 7.06 | 6.17 |
| PSME4              | 6.56 | 6.92 | 6.10 |
| COX7B              | 6.56 | 6.96 | 5.91 |
| ATF7IP             | 6.56 | 6.82 | 5.93 |
| METAP2             | 6.56 | 6.92 | 6.01 |
| IFNAR1             | 6.56 | 7.26 | 5.68 |
| SLC30A7            | 6.56 | 7.01 | 6.03 |
| BMS1               | 6.56 | 6.99 | 6.21 |
| RNF213             | 6.55 | 6.90 | 5.96 |
| TRPC4AP            | 6.55 | 6.99 | 6.10 |
| OTTHUMG00000002261 | 6.55 | 7.21 | 6.07 |
| SKIV2L2            | 6.55 | 6.99 | 6.02 |
| EED                | 6.55 | 7.04 | 6.24 |
| CCL2               | 6.55 | 7.86 | 4.89 |
| CDC42SE1           | 6.55 | 6.98 | 6.04 |
| WDR75              | 6.55 | 7.21 | 6.00 |
| GADD45A            | 6.55 | 7.32 | 5.82 |
| LOC388152          | 6.55 | 6.88 | 6.27 |
| NACA               | 6.55 | 6.90 | 6.07 |
| TSPAN3             | 6.55 | 6.86 | 6.17 |
| STAG3L1            | 6.55 | 7.14 | 6.11 |
| ZNF385B            | 6.55 | 7.36 | 5.10 |
| PTPN14             | 6.55 | 7.15 | 5.69 |
| ICK                | 6.55 | 6.77 | 6.30 |
| TUBG1              | 6.55 | 6.78 | 5.85 |
| MIR3916            | 6.55 | 6.82 | 6.22 |
| PRPF4B             | 6.55 | 6.99 | 5.94 |
| U2AF1              | 6.55 | 6.79 | 6.26 |
| SNORA57            | 6.55 | 6.70 | 6.36 |
| SMDT1              | 6.55 | 6.83 | 6.00 |
| VPS35              | 6.55 | 7.12 | 5.75 |
| NASP               | 6.55 | 6.83 | 6.24 |
| STRAP              | 6.55 | 7.27 | 6.05 |
| CDC42BPB           | 6.55 | 6.75 | 6.02 |
| C21ORF116          | 6.55 | 7.07 | 6.16 |

|                    |      |      |      |
|--------------------|------|------|------|
| SOS1               | 6.54 | 7.03 | 5.88 |
| SECISBP2L          | 6.54 | 7.11 | 6.16 |
| MFN2               | 6.54 | 6.87 | 6.07 |
| PRSS8              | 6.54 | 7.07 | 6.21 |
| BEX4               | 6.54 | 7.41 | 6.09 |
| ETS1               | 6.54 | 7.09 | 5.77 |
| ZNF292             | 6.54 | 6.99 | 6.24 |
| HNRNPU-AS1         | 6.54 | 6.89 | 5.91 |
| LINC00965          | 6.54 | 6.86 | 6.22 |
| ACIN1              | 6.54 | 6.88 | 6.05 |
| RNF11              | 6.54 | 7.07 | 5.82 |
| RNY3P9             | 6.54 | 7.29 | 5.88 |
| LOC100506710       | 6.54 | 7.11 | 5.59 |
| TJP1               | 6.54 | 7.08 | 5.78 |
| KLHDC2             | 6.54 | 6.85 | 5.90 |
| SETD3              | 6.54 | 6.85 | 6.04 |
| VAMP5              | 6.54 | 6.93 | 6.03 |
| PIAS2              | 6.54 | 6.90 | 6.06 |
| MIR3911            | 6.54 | 7.03 | 5.65 |
| TAF11              | 6.54 | 7.02 | 6.09 |
| MYH9               | 6.54 | 7.00 | 5.93 |
| HIST1H3I           | 6.54 | 8.23 | 5.12 |
| RWDD1              | 6.54 | 6.96 | 6.04 |
| SLC44A1            | 6.54 | 7.00 | 5.96 |
| AHI1               | 6.53 | 7.15 | 6.05 |
| HERC2P2            | 6.53 | 6.98 | 5.93 |
| PROCR              | 6.53 | 7.18 | 6.00 |
| TNFAIP1            | 6.53 | 7.03 | 5.85 |
| OTTHUMG00000170029 | 6.53 | 7.17 | 5.76 |
| TEAD2              | 6.53 | 7.03 | 5.96 |
| PTPRG              | 6.53 | 7.03 | 5.63 |
| KRCC1              | 6.53 | 6.96 | 5.82 |
| TNRC6A             | 6.53 | 7.00 | 5.66 |
| KIAA1328           | 6.53 | 6.80 | 6.01 |
| TMEM87A            | 6.53 | 7.43 | 5.77 |
| FKBP7              | 6.53 | 6.85 | 6.14 |
| LHFP               | 6.53 | 6.90 | 5.87 |
| STARD4-AS1         | 6.53 | 6.89 | 5.39 |
| MLLT10             | 6.53 | 6.87 | 6.14 |
| MIR99B             | 6.53 | 7.00 | 6.13 |
| SEH1L              | 6.53 | 6.81 | 5.96 |
| RAB3GAP1           | 6.53 | 6.97 | 6.05 |
| DYNC1LI2           | 6.53 | 6.98 | 5.81 |
| C10orf10           | 6.53 | 7.40 | 5.82 |
| ADK                | 6.53 | 6.84 | 5.86 |
| SUPT20H            | 6.53 | 6.87 | 6.06 |
| CMC2               | 6.53 | 7.31 | 5.95 |
| CDK17              | 6.53 | 6.99 | 5.85 |
| LOC80154           | 6.53 | 6.76 | 6.33 |

|                    |      |      |      |
|--------------------|------|------|------|
| TREML3P            | 6.53 | 7.13 | 5.66 |
| MAGEH1             | 6.53 | 7.08 | 5.72 |
| SENP7              | 6.53 | 7.04 | 6.01 |
| NAPG               | 6.53 | 7.18 | 5.57 |
| FLJ38717           | 6.53 | 7.04 | 6.00 |
| TMEM141            | 6.53 | 6.81 | 6.30 |
| EPC2               | 6.53 | 6.88 | 6.00 |
| TPP2               | 6.53 | 6.82 | 6.22 |
| OTTHUMG00000162779 | 6.53 | 7.24 | 5.93 |
| SLC39A14           | 6.53 | 7.21 | 5.91 |
| C16orf72           | 6.53 | 6.90 | 5.88 |
| ATP6V0C            | 6.53 | 7.25 | 5.63 |
| MAT2A              | 6.53 | 7.03 | 5.80 |
| NUS1               | 6.52 | 7.04 | 6.02 |
| ZFYVE16            | 6.52 | 6.96 | 5.99 |
| DCP2               | 6.52 | 6.94 | 5.82 |
| GTF2I              | 6.52 | 6.86 | 6.15 |
| OTTHUMG00000172523 | 6.52 | 6.87 | 6.31 |
| VPS13C             | 6.52 | 7.08 | 5.62 |
| LOC100289574       | 6.52 | 7.05 | 6.22 |
| ZNF254             | 6.52 | 7.10 | 6.02 |
| C1R                | 6.52 | 7.11 | 6.01 |
| CAT                | 6.52 | 6.95 | 5.97 |
| CCDC50             | 6.52 | 6.72 | 6.15 |
| PPP1R18            | 6.52 | 6.96 | 5.80 |
| PIP4K2B            | 6.52 | 6.97 | 5.94 |
| TXNL1              | 6.52 | 7.02 | 5.93 |
| FAXDC2             | 6.52 | 7.07 | 5.95 |
| AXL                | 6.52 | 7.18 | 5.33 |
| PRPF38A            | 6.52 | 6.76 | 5.86 |
| WBP11              | 6.52 | 7.08 | 6.10 |
| TSC22D2            | 6.52 | 6.98 | 5.76 |
| NTAN1              | 6.52 | 6.94 | 5.80 |
| ZFAND3             | 6.52 | 6.95 | 5.68 |
| OTTHUMG00000163312 | 6.52 | 7.00 | 6.16 |
| BBS2               | 6.52 | 7.04 | 5.87 |
| LOC286109          | 6.52 | 7.19 | 5.63 |
| GAGE12H            | 6.52 | 7.15 | 5.76 |
| MAP1LC3B2          | 6.52 | 6.91 | 6.02 |
| CYB5A              | 6.52 | 7.06 | 5.66 |
| BTG2               | 6.52 | 6.97 | 6.22 |
| UBR5               | 6.52 | 6.99 | 5.92 |
| FLII               | 6.52 | 6.91 | 6.00 |
| PDGFRB             | 6.52 | 7.29 | 5.41 |
| XG                 | 6.52 | 7.27 | 5.17 |
| MAPKAPK2           | 6.52 | 7.11 | 5.93 |
| UHMK1              | 6.52 | 6.88 | 6.11 |
| SPEN               | 6.52 | 6.92 | 5.97 |
| RAB12              | 6.52 | 6.93 | 5.90 |

|                    |      |      |      |
|--------------------|------|------|------|
| NT5DC2             | 6.52 | 7.06 | 5.88 |
| RPRD2              | 6.52 | 6.82 | 6.02 |
| RBM34              | 6.52 | 6.98 | 5.80 |
| RNA5SP113          | 6.52 | 6.96 | 6.06 |
| MEX3C              | 6.52 | 7.23 | 5.62 |
| SMOC1              | 6.52 | 7.48 | 5.71 |
| NIN                | 6.52 | 7.03 | 5.79 |
| USP24              | 6.52 | 7.06 | 5.82 |
| ZEB2               | 6.51 | 7.35 | 5.73 |
| LOC101060414       | 6.51 | 7.25 | 6.07 |
| FLJ44342           | 6.51 | 6.97 | 5.67 |
| CMAS               | 6.51 | 6.88 | 5.99 |
| GPR89B             | 6.51 | 6.83 | 5.98 |
| APPL1              | 6.51 | 6.81 | 6.19 |
| RIT1               | 6.51 | 6.79 | 6.01 |
| LOC100129129       | 6.51 | 7.06 | 6.25 |
| MIR4256            | 6.51 | 7.07 | 5.64 |
| JDP2               | 6.51 | 6.74 | 6.12 |
| GPR126             | 6.51 | 8.10 | 4.06 |
| CLASP1             | 6.51 | 7.11 | 6.01 |
| PRPF40A            | 6.51 | 6.88 | 5.50 |
| ADAP2              | 6.51 | 7.73 | 5.92 |
| RNASEH2C           | 6.51 | 6.77 | 6.04 |
| ARFGEF2            | 6.51 | 6.87 | 5.58 |
| UBE2L3             | 6.51 | 6.83 | 6.11 |
| UBE2G1             | 6.51 | 7.02 | 5.82 |
| VPS28              | 6.51 | 6.79 | 6.21 |
| SRM                | 6.51 | 6.86 | 5.85 |
| OTTHUMG00000151714 | 6.51 | 7.32 | 5.77 |
| RECQL              | 6.51 | 7.02 | 5.99 |
| WBP1L              | 6.51 | 6.97 | 6.05 |
| OTTHUMG00000176466 | 6.51 | 6.88 | 6.04 |
| TRAPPC5            | 6.51 | 6.93 | 5.89 |
| PLEKHH2            | 6.51 | 7.09 | 5.90 |
| FAM32A             | 6.51 | 6.89 | 5.89 |
| MTF1               | 6.50 | 6.87 | 5.99 |
| MRPS7              | 6.50 | 6.88 | 6.14 |
| CTCF               | 6.50 | 7.00 | 5.84 |
| SLX1B-SULT1A4      | 6.50 | 6.65 | 6.34 |
| CPSF6              | 6.50 | 6.94 | 6.13 |
| DZIP1              | 6.50 | 6.78 | 6.00 |
| DENND4C            | 6.50 | 6.95 | 5.94 |
| MLLT4              | 6.50 | 6.97 | 5.86 |
| ATP5F1             | 6.50 | 6.83 | 5.98 |
| GOLGA5             | 6.50 | 7.13 | 5.84 |
| SF3B3              | 6.50 | 6.88 | 5.84 |
| YTHDF3             | 6.50 | 6.90 | 5.96 |
| TSC1               | 6.50 | 6.85 | 6.15 |
| KCTD9              | 6.50 | 6.87 | 5.99 |

|                    |      |      |      |
|--------------------|------|------|------|
| MT1L               | 6.50 | 7.38 | 5.72 |
| RBFOX2             | 6.50 | 6.94 | 5.97 |
| COL10A1            | 6.50 | 7.64 | 4.48 |
| CD151              | 6.50 | 7.06 | 5.74 |
| NPIPL2             | 6.50 | 6.90 | 6.15 |
| TMCO3              | 6.50 | 7.17 | 5.90 |
| TMEM176B           | 6.50 | 6.96 | 5.98 |
| KARS               | 6.50 | 6.84 | 6.05 |
| FOXN3              | 6.50 | 6.84 | 6.06 |
| HMG2P15            | 6.50 | 6.75 | 6.04 |
| SMARCC2            | 6.50 | 6.82 | 5.91 |
| KRTCAP2            | 6.50 | 6.88 | 6.20 |
| MIR3975            | 6.50 | 7.31 | 5.65 |
| VPS26A             | 6.50 | 7.07 | 5.83 |
| TRIB2              | 6.50 | 7.00 | 5.83 |
| EDEM2              | 6.50 | 7.09 | 6.10 |
| GNAI3              | 6.50 | 7.29 | 5.72 |
| SMARCB1            | 6.50 | 6.99 | 6.09 |
| GOLGA8J            | 6.50 | 7.21 | 5.97 |
| SDAD1              | 6.50 | 6.92 | 5.84 |
| CSF1R              | 6.50 | 7.34 | 5.87 |
| DYNC2H1            | 6.50 | 6.77 | 6.27 |
| ADAM12             | 6.50 | 8.83 | 4.91 |
| HLA-DQA2           | 6.50 | 7.90 | 5.52 |
| BOC                | 6.50 | 7.10 | 5.90 |
| OTTHUMG00000160538 | 6.50 | 6.78 | 6.02 |
| TMEM248            | 6.50 | 6.97 | 6.05 |
| MFN1               | 6.50 | 6.89 | 5.86 |
| NXF1               | 6.50 | 6.82 | 6.10 |
| PIK3CA             | 6.50 | 6.87 | 6.10 |
| CNOT4              | 6.49 | 6.72 | 6.20 |
| RBM3               | 6.49 | 6.83 | 5.87 |
| HBS1L              | 6.49 | 6.90 | 5.91 |
| GDF10              | 6.49 | 7.51 | 5.46 |
| THBS3              | 6.49 | 7.31 | 5.63 |
| HBG1               | 6.49 | 7.63 | 5.97 |
| P4HA2              | 6.49 | 7.41 | 5.82 |
| MMP24-AS1          | 6.49 | 7.30 | 5.83 |
| MAR7               | 6.49 | 6.97 | 5.74 |
| MS4A6A             | 6.49 | 7.91 | 5.76 |
| GAS5               | 6.49 | 6.83 | 6.09 |
| SNAPC1             | 6.49 | 7.08 | 5.84 |
| VTI1B              | 6.49 | 7.07 | 5.82 |
| HDGFRP3            | 6.49 | 7.00 | 5.15 |
| PRR14              | 6.49 | 6.68 | 5.98 |
| LINC00294          | 6.49 | 6.80 | 6.16 |
| RWDD4              | 6.49 | 6.85 | 5.97 |
| MARVELD1           | 6.49 | 7.12 | 5.63 |
| FAM156B            | 6.49 | 6.79 | 6.14 |

|                           |      |      |      |
|---------------------------|------|------|------|
| <i>PTP4A3</i>             | 6.49 | 6.91 | 5.85 |
| <i>ZNF638-IT1</i>         | 6.49 | 6.84 | 6.00 |
| <i>C1GALT1</i>            | 6.49 | 7.06 | 5.92 |
| <i>CASK</i>               | 6.49 | 6.90 | 5.71 |
| <i>PHF21A</i>             | 6.49 | 6.86 | 6.19 |
| <i>YAE1D1</i>             | 6.49 | 6.68 | 5.89 |
| <i>LRRC16A</i>            | 6.49 | 6.93 | 6.07 |
| <i>CNN2</i>               | 6.49 | 7.10 | 6.03 |
| <i>TRBV11-1</i>           | 6.49 | 6.89 | 5.96 |
| <i>ZMYND11</i>            | 6.49 | 6.67 | 6.00 |
| <i>SLC25A36</i>           | 6.48 | 6.80 | 6.01 |
| <i>RTF1</i>               | 6.48 | 6.83 | 5.79 |
| <i>TXLNA</i>              | 6.48 | 7.10 | 5.79 |
| <i>TAC4</i>               | 6.48 | 7.15 | 5.91 |
| <i>ELTD1</i>              | 6.48 | 8.25 | 4.14 |
| <i>C2CD2</i>              | 6.48 | 7.14 | 5.94 |
| <i>CTDSP2</i>             | 6.48 | 6.87 | 5.82 |
| <i>C1orf85</i>            | 6.48 | 7.00 | 5.99 |
| <i>LRRC41</i>             | 6.48 | 6.77 | 6.16 |
| <i>OTTHUMG00000172175</i> | 6.48 | 7.31 | 5.70 |
| <i>IGLV1-36</i>           | 6.48 | 7.11 | 6.07 |
| <i>MIR3620</i>            | 6.48 | 6.94 | 5.94 |
| <i>MIR27B</i>             | 6.48 | 7.31 | 5.42 |
| <i>OTUD5</i>              | 6.48 | 6.78 | 6.14 |
| <i>ZFP91-CNTF</i>         | 6.48 | 6.82 | 5.97 |
| <i>PVRL3</i>              | 6.48 | 6.84 | 6.17 |
| <i>RSRC2</i>              | 6.48 | 6.80 | 5.91 |
| <i>CBR3</i>               | 6.48 | 7.19 | 5.41 |
| <i>WWP1</i>               | 6.48 | 6.87 | 5.83 |
| <i>ANXA11</i>             | 6.48 | 6.67 | 6.29 |
| <i>ECD</i>                | 6.48 | 6.74 | 6.01 |
| <i>RAB18</i>              | 6.48 | 6.89 | 5.89 |
| <i>IKBKAP</i>             | 6.48 | 6.94 | 5.86 |
| <i>HIST2H2AB</i>          | 6.48 | 6.93 | 5.57 |
| <i>CCND1</i>              | 6.48 | 7.17 | 5.72 |
| <i>EPN1</i>               | 6.48 | 6.99 | 6.07 |
| <i>GOLT1B</i>             | 6.48 | 7.26 | 5.62 |
| <i>FYTTD1</i>             | 6.48 | 6.94 | 6.02 |
| <i>JAG1</i>               | 6.48 | 6.99 | 5.83 |
| <i>ITPA</i>               | 6.47 | 6.93 | 5.99 |
| <i>API5</i>               | 6.47 | 7.15 | 5.94 |
| <i>RNA5SP190</i>          | 6.47 | 6.97 | 6.00 |
| <i>ATP8B1</i>             | 6.47 | 7.04 | 6.02 |
| <i>LAMB1</i>              | 6.47 | 7.15 | 5.76 |
| <i>SARNP</i>              | 6.47 | 7.22 | 5.88 |
| <i>PIH1D1</i>             | 6.47 | 7.00 | 5.92 |
| <i>DNAJC13</i>            | 6.47 | 7.10 | 5.72 |
| <i>CRNKL1</i>             | 6.47 | 6.84 | 5.71 |
| <i>BICC1</i>              | 6.47 | 7.25 | 5.46 |

|              |      |      |      |
|--------------|------|------|------|
| GABBR1       | 6.47 | 6.70 | 6.14 |
| DR1          | 6.47 | 6.94 | 5.90 |
| TROVE2       | 6.47 | 6.88 | 5.77 |
| ARHGAP35     | 6.47 | 7.05 | 5.87 |
| PSMC1        | 6.47 | 6.89 | 5.82 |
| METTL10      | 6.47 | 6.87 | 5.84 |
| NDUFS2       | 6.47 | 6.81 | 5.96 |
| UBE4B        | 6.47 | 6.81 | 6.07 |
| CALM3        | 6.47 | 6.72 | 6.14 |
| ANKRD36BP1   | 6.47 | 7.17 | 5.24 |
| ZNF592       | 6.47 | 6.87 | 6.03 |
| ZC3HAV1      | 6.47 | 6.87 | 5.95 |
| GABPB2       | 6.47 | 7.01 | 6.00 |
| DPYD         | 6.47 | 7.10 | 5.97 |
| PRKACA       | 6.47 | 6.84 | 6.04 |
| ITPRIPL2     | 6.47 | 6.83 | 6.10 |
| NDUFB3       | 6.47 | 6.90 | 6.11 |
| DCTN3        | 6.47 | 6.75 | 6.15 |
| SNORD67      | 6.47 | 7.15 | 5.77 |
| MIR4692      | 6.46 | 7.09 | 5.88 |
| IPO9-AS1     | 6.46 | 7.33 | 5.81 |
| PAICS        | 6.46 | 7.01 | 5.93 |
| LOC100506053 | 6.46 | 7.63 | 5.50 |
| LOXL1        | 6.46 | 7.90 | 5.53 |
| SEC13        | 6.46 | 6.93 | 5.83 |
| COG1         | 6.46 | 6.69 | 6.05 |
| MAGT1        | 6.46 | 6.95 | 5.93 |
| JHDM1D       | 6.46 | 7.26 | 5.43 |
| FOXS1        | 6.46 | 6.87 | 6.03 |
| ITSN2        | 6.46 | 6.82 | 5.96 |
| KIF13A       | 6.46 | 6.86 | 5.74 |
| ATP6V1C1     | 6.46 | 7.00 | 5.71 |
| RNF216       | 6.46 | 6.65 | 6.17 |
| SRP68        | 6.46 | 6.77 | 5.88 |
| GLRX3        | 6.46 | 7.03 | 5.89 |
| TMEM106A     | 6.46 | 6.86 | 5.88 |
| FBXW2        | 6.46 | 7.02 | 5.94 |
| GPR89C       | 6.46 | 6.72 | 6.07 |
| NUTM2D       | 6.46 | 6.85 | 6.15 |
| ALDH3A2      | 6.46 | 6.99 | 5.90 |
| SNX3         | 6.46 | 6.84 | 5.87 |
| TNFRSF1A     | 6.46 | 6.79 | 6.08 |
| LMCD1        | 6.46 | 6.86 | 6.01 |
| BACE1        | 6.46 | 6.98 | 6.00 |
| RAB3GAP2     | 6.46 | 6.92 | 5.90 |
| MIR1269A     | 6.46 | 7.24 | 5.91 |
| RB1          | 6.46 | 6.83 | 5.85 |
| IL17RA       | 6.46 | 6.77 | 6.15 |
| SDHC         | 6.46 | 6.97 | 6.03 |



|                    |      |      |      |
|--------------------|------|------|------|
| CCT7               | 6.46 | 6.85 | 6.02 |
| FZD4               | 6.46 | 6.96 | 5.83 |
| RAB10              | 6.46 | 7.13 | 5.72 |
| MED14              | 6.46 | 6.95 | 5.91 |
| STAM               | 6.46 | 7.33 | 5.75 |
| DOCK7              | 6.46 | 7.08 | 5.70 |
| MAPKAPK5           | 6.45 | 6.81 | 5.94 |
| FLJ43681           | 6.45 | 6.85 | 6.23 |
| FAM160B2           | 6.45 | 6.75 | 6.22 |
| RIMKLB             | 6.45 | 6.75 | 6.22 |
| ETFB               | 6.45 | 6.77 | 6.20 |
| MOB1A              | 6.45 | 6.96 | 5.54 |
| PLEKHM1            | 6.45 | 6.80 | 6.03 |
| ZFAND5             | 6.45 | 6.78 | 6.00 |
| TGFBR3             | 6.45 | 7.11 | 5.65 |
| FBXO22-AS1         | 6.45 | 6.94 | 5.91 |
| LOC389607          | 6.45 | 6.85 | 5.99 |
| PTTG3P             | 6.45 | 6.96 | 5.64 |
| ZRANB1             | 6.45 | 6.85 | 5.67 |
| TMEM39A            | 6.45 | 6.93 | 5.87 |
| CLOCK              | 6.45 | 7.06 | 5.90 |
| IARS               | 6.45 | 7.31 | 5.50 |
| BOD1L1             | 6.45 | 6.74 | 5.93 |
| PSG6               | 6.45 | 6.93 | 5.92 |
| RNF114             | 6.45 | 6.91 | 5.97 |
| NRIP1              | 6.45 | 6.95 | 5.73 |
| ARPC3              | 6.45 | 6.93 | 6.00 |
| MSH6               | 6.45 | 6.75 | 6.12 |
| RNA5SP506          | 6.45 | 6.79 | 5.66 |
| BAZ1A              | 6.45 | 6.80 | 5.71 |
| ATP1B3             | 6.45 | 6.76 | 6.06 |
| RPS6KB1            | 6.45 | 6.90 | 5.95 |
| SLC6A6             | 6.45 | 6.88 | 5.65 |
| RAF1               | 6.45 | 6.72 | 5.98 |
| SH3BGRL            | 6.45 | 6.93 | 5.95 |
| ARMCX1             | 6.45 | 6.89 | 6.07 |
| MTCH1              | 6.45 | 6.89 | 6.03 |
| IGHD2-21           | 6.45 | 6.81 | 5.99 |
| NUP214             | 6.45 | 6.72 | 6.00 |
| OTTHUMG00000013881 | 6.45 | 6.95 | 6.05 |
| CCDC25             | 6.45 | 6.80 | 5.92 |
| SOCS6              | 6.45 | 6.78 | 6.09 |
| TM9SF1             | 6.45 | 6.81 | 6.15 |
| RREB1              | 6.45 | 6.88 | 5.99 |
| SNORD88A           | 6.45 | 6.61 | 6.23 |
| PDIA6              | 6.45 | 6.80 | 5.77 |
| OCIAD1             | 6.44 | 6.73 | 6.17 |
| GDE1               | 6.44 | 7.23 | 5.31 |
| MKL2               | 6.44 | 6.99 | 5.69 |

|              |      |      |      |
|--------------|------|------|------|
| CYC1         | 6.44 | 6.66 | 6.05 |
| HMBOX1       | 6.44 | 6.73 | 6.07 |
| DTD1         | 6.44 | 7.28 | 5.70 |
| TGFBRAP1     | 6.44 | 6.70 | 6.15 |
| BRAF         | 6.44 | 6.86 | 5.94 |
| UBE2D1       | 6.44 | 6.97 | 5.91 |
| DDX19B       | 6.44 | 6.71 | 5.69 |
| CLTA         | 6.44 | 7.09 | 5.77 |
| MSANTD2      | 6.44 | 6.81 | 6.24 |
| FOXP4        | 6.44 | 6.84 | 6.22 |
| IL16         | 6.44 | 6.85 | 6.03 |
| AP3M1        | 6.44 | 6.93 | 5.71 |
| MLLT1        | 6.44 | 6.73 | 6.29 |
| TBCB         | 6.44 | 7.00 | 5.88 |
| TPPP3        | 6.44 | 7.63 | 5.30 |
| OR1D2        | 6.44 | 7.70 | 5.74 |
| WFDC13       | 6.44 | 6.89 | 6.09 |
| GTF2B        | 6.44 | 6.87 | 6.00 |
| ERGIC2       | 6.44 | 6.95 | 5.72 |
| CREB3        | 6.44 | 6.97 | 5.68 |
| AQR          | 6.44 | 6.87 | 5.90 |
| DUSP1        | 6.44 | 7.14 | 5.69 |
| IFITM10      | 6.44 | 7.42 | 5.90 |
| TREM1        | 6.44 | 8.73 | 4.24 |
| PPT1         | 6.44 | 7.20 | 6.06 |
| FAM8A1       | 6.44 | 6.97 | 5.93 |
| ZNF780B      | 6.44 | 6.85 | 5.99 |
| CD99P1       | 6.44 | 6.94 | 5.71 |
| VPS25        | 6.44 | 6.92 | 5.78 |
| TMEM259      | 6.44 | 6.91 | 5.79 |
| RFC1         | 6.43 | 6.93 | 5.90 |
| G3BP1        | 6.43 | 6.96 | 5.74 |
| MIR4689      | 6.43 | 6.89 | 6.03 |
| LOC100505876 | 6.43 | 6.66 | 5.99 |
| ZSWIM8-AS1   | 6.43 | 6.93 | 5.92 |
| SEC11C       | 6.43 | 6.73 | 6.12 |
| CTAGE15      | 6.43 | 6.75 | 6.10 |
| CCNT1        | 6.43 | 6.76 | 6.16 |
| HPS3         | 6.43 | 6.79 | 6.04 |
| ADAMTS5      | 6.43 | 7.24 | 4.88 |
| LOC644794    | 6.43 | 6.79 | 5.76 |
| OXLD1        | 6.43 | 7.04 | 5.76 |
| RPPH1        | 6.43 | 6.75 | 6.11 |
| INTS4L2      | 6.43 | 6.86 | 5.99 |
| MT1E         | 6.43 | 7.42 | 5.54 |
| MED4-AS1     | 6.43 | 6.98 | 5.42 |
| ZNF790       | 6.43 | 6.67 | 6.17 |
| OSBPL9       | 6.43 | 6.77 | 5.80 |
| FAM13A       | 6.43 | 7.39 | 6.07 |

|           |      |      |      |
|-----------|------|------|------|
| ADSS      | 6.43 | 7.03 | 5.61 |
| LAG3      | 6.43 | 7.10 | 5.93 |
| RIPK1     | 6.43 | 6.91 | 5.88 |
| HAX1      | 6.43 | 6.89 | 6.09 |
| YLPM1     | 6.43 | 6.74 | 6.15 |
| TMX3      | 6.43 | 7.00 | 5.61 |
| RNA5SP449 | 6.43 | 7.20 | 6.00 |
| ICAM2     | 6.43 | 7.00 | 5.91 |
| COPS3     | 6.43 | 6.77 | 5.95 |
| LIMS1     | 6.43 | 6.96 | 5.30 |
| PPP3R1    | 6.43 | 6.71 | 5.94 |
| MIR4522   | 6.43 | 6.98 | 6.13 |
| SCRN1     | 6.43 | 7.16 | 5.85 |
| CNTFR     | 6.43 | 7.65 | 5.24 |
| DEXI      | 6.43 | 6.64 | 5.95 |
| MIR4673   | 6.43 | 6.84 | 5.83 |
| ETFA      | 6.43 | 6.72 | 6.02 |
| FOPNL     | 6.43 | 6.82 | 5.58 |
| KANSL1L   | 6.43 | 6.82 | 5.83 |
| ECM1      | 6.43 | 7.40 | 5.62 |
| SNORD63   | 6.42 | 7.29 | 5.86 |
| EGLN1     | 6.42 | 6.87 | 5.81 |
| MTRNR2L2  | 6.42 | 7.31 | 5.35 |
| TBC1D23   | 6.42 | 6.99 | 6.03 |
| FMNL2     | 6.42 | 7.03 | 5.60 |
| SCCPDH    | 6.42 | 6.84 | 5.72 |
| ESCO1     | 6.42 | 6.72 | 6.02 |
| C16orf91  | 6.42 | 6.64 | 5.97 |
| LOC401357 | 6.42 | 7.19 | 5.61 |
| STX2      | 6.42 | 6.95 | 5.47 |
| YEATS2    | 6.42 | 6.84 | 5.98 |
| CRBN      | 6.42 | 6.86 | 5.80 |
| LAMP2     | 6.42 | 7.25 | 5.43 |
| MMP23A    | 6.42 | 6.67 | 6.33 |
| RXRB      | 6.42 | 6.67 | 5.66 |
| RGS10     | 6.42 | 7.17 | 5.53 |
| STXBP3    | 6.42 | 6.93 | 5.87 |
| TLL5      | 6.42 | 6.68 | 6.07 |
| DYNLT1    | 6.42 | 6.97 | 5.62 |
| CLK3      | 6.42 | 6.72 | 6.17 |
| LAMTOR3   | 6.42 | 7.03 | 5.41 |
| TCTN2     | 6.42 | 6.81 | 6.08 |
| TMEM167B  | 6.42 | 7.18 | 5.85 |
| GNPAT     | 6.42 | 6.99 | 5.65 |
| CRLF3     | 6.42 | 6.96 | 6.03 |
| ANAPC16   | 6.42 | 6.76 | 5.73 |
| AHCTF1    | 6.42 | 7.05 | 5.63 |
| CD34      | 6.42 | 7.69 | 4.94 |
| PQLC3     | 6.42 | 6.94 | 5.88 |

|                    |      |      |      |
|--------------------|------|------|------|
| COTL1              | 6.42 | 7.14 | 5.88 |
| MIR365A            | 6.42 | 6.80 | 5.88 |
| RELL1              | 6.42 | 6.93 | 5.92 |
| SLC30A9            | 6.42 | 6.89 | 5.65 |
| RPL24              | 6.42 | 6.58 | 6.27 |
| VPS13B             | 6.42 | 6.85 | 5.81 |
| RAB11B             | 6.41 | 6.93 | 5.83 |
| TBC1D17            | 6.41 | 6.74 | 5.99 |
| OTTHUMG00000035468 | 6.41 | 6.65 | 5.98 |
| OTTHUMG00000170442 | 6.41 | 6.98 | 5.96 |
| TBC1D22A           | 6.41 | 6.80 | 5.97 |
| KCNQ5-IT1          | 6.41 | 7.33 | 5.57 |
| C2CD5              | 6.41 | 6.84 | 5.74 |
| MIR4756            | 6.41 | 6.84 | 6.11 |
| PIKFYVE            | 6.41 | 6.81 | 5.82 |
| IDH3G              | 6.41 | 6.75 | 5.61 |
| TUBB6              | 6.41 | 6.92 | 5.59 |
| HK2                | 6.41 | 6.93 | 5.91 |
| POLR2I             | 6.41 | 6.91 | 5.47 |
| HIPK2              | 6.41 | 6.75 | 5.99 |
| PRRC2B             | 6.41 | 6.67 | 6.07 |
| PAPSS1             | 6.41 | 6.61 | 6.22 |
| RBBP6              | 6.41 | 6.70 | 5.69 |
| AKAP10             | 6.41 | 6.73 | 6.15 |
| NUDT1              | 6.41 | 6.99 | 4.88 |
| HLA-DPB1           | 6.41 | 7.44 | 5.74 |
| UBR3               | 6.41 | 6.83 | 5.80 |
| CUL7               | 6.41 | 6.82 | 5.87 |
| SNORD3C            | 6.41 | 7.80 | 5.76 |
| LPGAT1             | 6.41 | 6.94 | 6.00 |
| OSTC               | 6.41 | 7.00 | 5.60 |
| MSL2               | 6.41 | 6.61 | 6.02 |
| YBX3               | 6.41 | 6.92 | 6.05 |
| RPL18              | 6.41 | 6.56 | 6.23 |
| SETD7              | 6.41 | 6.67 | 6.00 |
| ITSN1              | 6.41 | 6.86 | 5.88 |
| PLXNB2             | 6.41 | 6.52 | 6.24 |
| HMCN1              | 6.40 | 8.04 | 4.96 |
| HYMAI              | 6.40 | 7.04 | 5.69 |
| MDC1-AS1           | 6.40 | 6.65 | 5.98 |
| VPS45              | 6.40 | 6.84 | 5.87 |
| ANAPC13            | 6.40 | 6.64 | 6.03 |
| GOSR1              | 6.40 | 6.98 | 6.13 |
| MXRA7              | 6.40 | 7.61 | 5.61 |
| FABP3              | 6.40 | 7.16 | 5.40 |
| TAGLN              | 6.40 | 6.93 | 5.60 |
| OTTHUMG00000164836 | 6.40 | 6.71 | 6.18 |
| ATF6B              | 6.40 | 6.65 | 5.97 |
| TASP1              | 6.40 | 6.72 | 6.04 |

|                    |      |      |      |
|--------------------|------|------|------|
| CSNK1A1            | 6.40 | 6.91 | 5.87 |
| LOC440434          | 6.40 | 6.94 | 5.53 |
| SLC2A1             | 6.40 | 7.98 | 5.04 |
| ZBTB20-AS4         | 6.40 | 7.14 | 5.79 |
| SPCS3              | 6.40 | 7.05 | 5.77 |
| C2                 | 6.40 | 6.81 | 6.02 |
| MIR4267            | 6.40 | 7.00 | 5.97 |
| ATP5SL             | 6.40 | 6.71 | 5.87 |
| OTTHUMG00000013244 | 6.40 | 6.95 | 6.02 |
| RYBP               | 6.40 | 6.75 | 5.88 |
| SSRP1              | 6.40 | 6.81 | 6.08 |
| ANKIB1             | 6.40 | 6.81 | 5.31 |
| LMLN-AS1           | 6.40 | 6.74 | 6.14 |
| SLBP               | 6.40 | 7.24 | 5.55 |
| NUDT16L1           | 6.40 | 6.94 | 6.11 |
| TRIM78P            | 6.40 | 6.80 | 6.09 |
| IGF1               | 6.40 | 6.86 | 5.86 |
| CCDC109B           | 6.40 | 7.06 | 5.76 |
| PGGT1B             | 6.40 | 6.91 | 5.74 |
| KIAA1199           | 6.40 | 7.99 | 4.70 |
| SQRDL              | 6.40 | 6.91 | 5.15 |
| MIR4663            | 6.39 | 6.79 | 6.07 |
| SACM1L             | 6.39 | 6.80 | 5.82 |
| PAN3               | 6.39 | 6.77 | 5.73 |
| KIAA1430           | 6.39 | 6.73 | 5.80 |
| CCNL2              | 6.39 | 6.60 | 6.00 |
| FAM89B             | 6.39 | 6.85 | 5.68 |
| OGFOD1             | 6.39 | 7.00 | 5.82 |
| PITPNB             | 6.39 | 6.82 | 5.61 |
| MS4A7              | 6.39 | 7.73 | 5.22 |
| FOS                | 6.39 | 7.48 | 5.35 |
| CRYZ               | 6.39 | 6.95 | 5.49 |
| UBL7               | 6.39 | 6.88 | 5.92 |
| OTTHUMG00000168722 | 6.39 | 6.97 | 6.05 |
| LOC399491          | 6.39 | 6.84 | 5.94 |
| NELFCD             | 6.39 | 6.85 | 5.95 |
| ATP1B2             | 6.39 | 7.13 | 5.24 |
| MDK                | 6.39 | 6.95 | 6.09 |
| TBCA               | 6.39 | 6.82 | 5.56 |
| SNORA80            | 6.39 | 6.82 | 5.98 |
| THBS2              | 6.39 | 7.87 | 4.61 |
| LGALS8             | 6.39 | 6.74 | 5.97 |
| NR1D1              | 6.39 | 7.13 | 5.41 |
| OTTHUMG00000184015 | 6.39 | 7.42 | 5.25 |
| S100A8             | 6.39 | 8.18 | 4.25 |
| TRIM38             | 6.39 | 6.79 | 6.05 |
| SMN1               | 6.39 | 7.05 | 5.75 |
| DUSP11             | 6.39 | 6.90 | 5.67 |
| PIAS4              | 6.39 | 6.60 | 6.22 |

|                    |      |      |      |
|--------------------|------|------|------|
| ISCA2              | 6.39 | 6.55 | 6.14 |
| HEATR3             | 6.39 | 6.89 | 5.80 |
| RAP2C              | 6.39 | 6.70 | 5.69 |
| AKAP11             | 6.39 | 6.99 | 5.85 |
| FBXL5              | 6.39 | 6.83 | 5.84 |
| TRMT13             | 6.39 | 6.61 | 6.18 |
| MSH5-SAPCD1        | 6.39 | 6.78 | 5.94 |
| FDX1L              | 6.39 | 6.62 | 6.17 |
| SUN2               | 6.39 | 6.80 | 6.04 |
| GNA13              | 6.39 | 6.79 | 5.95 |
| HLTF               | 6.39 | 7.02 | 5.82 |
| BCKDHB             | 6.38 | 6.74 | 5.91 |
| THUMPD3            | 6.38 | 6.79 | 5.55 |
| UQCRBP1            | 6.38 | 6.65 | 5.90 |
| RBPJ               | 6.38 | 6.88 | 5.80 |
| WDR60              | 6.38 | 6.81 | 5.73 |
| PIBF1              | 6.38 | 6.89 | 5.85 |
| SCARNA3            | 6.38 | 6.81 | 6.07 |
| TMEM65             | 6.38 | 7.07 | 5.56 |
| TRAPPC11           | 6.38 | 6.80 | 5.88 |
| UROS               | 6.38 | 6.70 | 6.10 |
| OTTHUMG00000040559 | 6.38 | 6.58 | 6.10 |
| PPP1R10            | 6.38 | 6.75 | 5.93 |
| LOC389765          | 6.38 | 6.76 | 5.87 |
| PGAM1P5            | 6.38 | 6.77 | 6.11 |
| SETD5-AS1          | 6.38 | 6.66 | 6.15 |
| SNORA60            | 6.38 | 7.63 | 5.04 |
| IMP4               | 6.38 | 6.58 | 6.15 |
| CEP63              | 6.38 | 6.60 | 6.06 |
| HLA-DMB            | 6.38 | 7.54 | 5.85 |
| PSMC3              | 6.38 | 6.70 | 5.96 |
| GPX8               | 6.38 | 7.44 | 5.03 |
| RPLP0              | 6.38 | 6.66 | 6.06 |
| USP15              | 6.38 | 6.75 | 5.53 |
| GAP43              | 6.38 | 6.75 | 5.92 |
| C8orf46            | 6.38 | 6.61 | 5.90 |
| LOC100505570       | 6.38 | 7.18 | 5.46 |
| CALCOCO1           | 6.38 | 6.69 | 5.92 |
| IGKV1-27           | 6.38 | 6.81 | 6.17 |
| AKR1A1             | 6.38 | 7.04 | 5.66 |
| TMEM109            | 6.38 | 6.72 | 5.98 |
| ACAA2              | 6.38 | 7.00 | 5.13 |
| GALNT5             | 6.38 | 6.90 | 5.17 |
| OTTHUMG00000171037 | 6.38 | 6.69 | 5.88 |
| GLO1               | 6.38 | 6.81 | 5.51 |
| POMZP3             | 6.37 | 6.67 | 5.92 |
| SETD2              | 6.37 | 6.87 | 5.77 |
| KIDINS220          | 6.37 | 6.84 | 5.80 |
| IGHG2              | 6.37 | 7.32 | 5.47 |

|                    |      |      |      |
|--------------------|------|------|------|
| CCNK               | 6.37 | 6.76 | 5.99 |
| MTMR2              | 6.37 | 6.80 | 5.69 |
| SAPCD1             | 6.37 | 6.81 | 5.89 |
| NCK2               | 6.37 | 6.72 | 6.02 |
| GOLGA7B            | 6.37 | 7.35 | 5.03 |
| TULP4              | 6.37 | 6.66 | 5.81 |
| RAP2B              | 6.37 | 6.77 | 5.96 |
| OTTHUMG00000016092 | 6.37 | 7.04 | 6.01 |
| MIR587             | 6.37 | 6.96 | 5.79 |
| TMEM170A           | 6.37 | 6.75 | 5.94 |
| SMC5-AS1           | 6.37 | 7.08 | 5.90 |
| ZNF83              | 6.37 | 6.96 | 5.93 |
| PLCG1              | 6.37 | 6.52 | 6.13 |
| SLC39A9            | 6.37 | 6.92 | 5.74 |
| STK38              | 6.37 | 7.03 | 5.64 |
| DDX58              | 6.37 | 6.65 | 5.92 |
| ECSCR              | 6.37 | 6.97 | 5.29 |
| STAT5B             | 6.37 | 6.71 | 6.07 |
| PTBP2              | 6.37 | 6.76 | 5.88 |
| OTTHUMG00000161703 | 6.37 | 6.99 | 5.77 |
| IAH1               | 6.37 | 6.83 | 5.78 |
| IL4R               | 6.37 | 6.73 | 5.71 |
| C5orf42            | 6.37 | 6.79 | 5.78 |
| SNAPC3             | 6.37 | 6.68 | 5.87 |
| NT5C2              | 6.37 | 6.60 | 5.98 |
| PILRB              | 6.37 | 6.88 | 5.61 |
| SAP30L-AS1         | 6.37 | 6.67 | 6.17 |
| SEPT8              | 6.37 | 6.82 | 5.44 |
| ARHGAP12           | 6.37 | 6.93 | 5.58 |
| RIF1               | 6.37 | 6.73 | 5.89 |
| DNM1P41            | 6.37 | 7.01 | 6.01 |
| SNAR-G2            | 6.37 | 7.28 | 5.83 |
| LRRFIP2            | 6.37 | 6.62 | 6.00 |
| RCN3               | 6.37 | 7.26 | 5.41 |
| WASH2P             | 6.37 | 6.86 | 5.85 |
| FAM214B            | 6.37 | 6.81 | 6.02 |
| UXT                | 6.37 | 6.63 | 5.94 |
| CERCAM             | 6.37 | 6.66 | 5.91 |
| NSMCE1             | 6.37 | 6.87 | 5.86 |
| VCX2               | 6.37 | 6.67 | 5.99 |
| SNX5               | 6.37 | 6.74 | 5.54 |
| LOC100129596       | 6.37 | 6.71 | 6.14 |
| IGKV1-37           | 6.37 | 6.81 | 6.01 |
| UFM1               | 6.36 | 6.98 | 5.61 |
| MIR4786            | 6.36 | 6.79 | 5.83 |
| SUSD5              | 6.36 | 7.01 | 5.94 |
| MRPL14             | 6.36 | 7.53 | 5.54 |
| CLPX               | 6.36 | 6.70 | 5.72 |
| FARSB              | 6.36 | 6.85 | 5.95 |

|                        |      |      |      |
|------------------------|------|------|------|
| CHPF2                  | 6.36 | 6.80 | 5.88 |
| MYO5A                  | 6.36 | 6.95 | 5.57 |
| SIAH1                  | 6.36 | 6.62 | 5.83 |
| ARL4C                  | 6.36 | 8.55 | 5.10 |
| HSPA1A                 | 6.36 | 7.07 | 5.95 |
| MATR3                  | 6.36 | 6.58 | 6.03 |
| SRSF8                  | 6.36 | 6.67 | 5.98 |
| PNRC2                  | 6.36 | 6.91 | 5.99 |
| SDF2                   | 6.36 | 6.84 | 5.75 |
| DTX2P1-UPK3BP1-PMS2P11 | 6.36 | 6.74 | 5.88 |
| TMEM126A               | 6.36 | 7.00 | 5.62 |
| RNF146                 | 6.36 | 6.63 | 5.84 |
| RNF115                 | 6.36 | 6.66 | 6.00 |
| ITGA1                  | 6.36 | 7.03 | 5.73 |
| CDK2AP1                | 6.36 | 6.51 | 6.21 |
| PSMD10                 | 6.36 | 6.87 | 5.86 |
| SGCD                   | 6.36 | 7.23 | 5.08 |
| ZNF524                 | 6.36 | 6.55 | 5.96 |
| CCNH                   | 6.36 | 6.72 | 5.85 |
| ZNF318                 | 6.36 | 6.77 | 6.07 |
| TP53TG3                | 6.36 | 6.82 | 5.92 |
| FAM27E2                | 6.36 | 6.88 | 5.95 |
| SNORA71A               | 6.36 | 7.00 | 5.91 |
| GPCPD1                 | 6.36 | 7.08 | 5.80 |
| R3HDM2                 | 6.36 | 6.78 | 5.85 |
| CTDSPL2                | 6.36 | 6.81 | 5.75 |
| DIP2C                  | 6.36 | 6.83 | 5.88 |
| CST6                   | 6.36 | 6.80 | 5.92 |
| MFAP4                  | 6.35 | 6.73 | 5.46 |
| CFI                    | 6.35 | 7.38 | 5.70 |
| SNORD53                | 6.35 | 6.58 | 5.95 |
| SUGT1                  | 6.35 | 6.96 | 5.39 |
| MAP3K4                 | 6.35 | 6.61 | 5.87 |
| NDUFV3                 | 6.35 | 6.64 | 6.08 |
| TNFRSF25               | 6.35 | 6.94 | 6.05 |
| PGLS                   | 6.35 | 6.66 | 5.83 |
| LIMD2                  | 6.35 | 6.65 | 5.93 |
| WIPF1                  | 6.35 | 7.15 | 5.77 |
| UTP6                   | 6.35 | 6.67 | 5.63 |
| CDC26                  | 6.35 | 6.83 | 5.80 |
| ALG2                   | 6.35 | 6.74 | 5.88 |
| SLC50A1                | 6.35 | 6.72 | 5.95 |
| SNAR-F                 | 6.35 | 6.89 | 5.63 |
| IGLV1-44               | 6.35 | 9.14 | 5.78 |
| EPM2AIP1               | 6.35 | 6.66 | 5.74 |
| ZNF131                 | 6.35 | 6.57 | 6.04 |
| LOC154761              | 6.35 | 7.05 | 5.80 |
| TYMS                   | 6.35 | 6.86 | 5.68 |
| EIF3F                  | 6.35 | 6.66 | 5.82 |



|                    |      |      |      |
|--------------------|------|------|------|
| CELF1              | 6.35 | 6.67 | 5.99 |
| COBLL1             | 6.35 | 6.68 | 5.89 |
| TNFRSF12A          | 6.35 | 8.18 | 5.18 |
| LOC100506142       | 6.35 | 6.68 | 5.99 |
| MOB3A              | 6.35 | 6.84 | 6.06 |
| DIXDC1             | 6.35 | 7.25 | 5.48 |
| DHX9               | 6.35 | 6.93 | 5.48 |
| DYNLL1-AS1         | 6.35 | 6.61 | 6.05 |
| SNAP29             | 6.35 | 6.65 | 5.58 |
| CCDC28A            | 6.35 | 6.70 | 6.04 |
| OTTHUMG00000177423 | 6.35 | 6.55 | 6.20 |
| GEM                | 6.35 | 7.00 | 5.28 |
| RAB23              | 6.35 | 7.91 | 4.96 |
| FAM129A            | 6.35 | 7.19 | 5.12 |
| SLMO2              | 6.35 | 6.91 | 5.68 |
| MYO10              | 6.35 | 6.75 | 5.75 |
| DSEL               | 6.35 | 7.41 | 5.09 |
| BLVRA              | 6.35 | 7.05 | 5.72 |
| FAM73A             | 6.35 | 6.65 | 6.00 |
| SAV1               | 6.35 | 6.68 | 5.70 |
| WDR7               | 6.35 | 6.65 | 5.73 |
| TRBV7-6            | 6.34 | 6.67 | 5.96 |
| SEC11A             | 6.34 | 6.87 | 5.59 |
| KIF2A              | 6.34 | 6.64 | 6.03 |
| MCMBP              | 6.34 | 6.80 | 5.81 |
| POLR1D             | 6.34 | 6.78 | 5.64 |
| SNORA71C           | 6.34 | 6.81 | 5.87 |
| ANKRD13C           | 6.34 | 6.68 | 5.82 |
| CYP20A1            | 6.34 | 7.09 | 5.94 |
| THRA               | 6.34 | 7.13 | 5.61 |
| SEC23A             | 6.34 | 7.04 | 5.88 |
| TLN1               | 6.34 | 6.79 | 5.65 |
| SBF2               | 6.34 | 6.80 | 5.84 |
| DCAF7              | 6.34 | 6.69 | 5.90 |
| TWF1               | 6.34 | 7.12 | 5.70 |
| EOGT               | 6.34 | 6.73 | 5.87 |
| GTF2H5             | 6.34 | 6.68 | 5.93 |
| SYNGAP1            | 6.34 | 6.58 | 5.87 |
| DIAPH1             | 6.34 | 6.92 | 5.76 |
| POLDIP2            | 6.34 | 6.70 | 5.64 |
| OSBP               | 6.34 | 6.65 | 5.90 |
| MRPL53             | 6.34 | 6.68 | 6.01 |
| ARIH2              | 6.34 | 6.71 | 5.78 |
| FAM197Y5           | 6.34 | 7.68 | 4.64 |
| ZCCHC11            | 6.34 | 6.69 | 5.89 |
| RNF185-AS1         | 6.34 | 7.13 | 4.88 |
| STAT2              | 6.34 | 6.78 | 5.60 |
| PCDHB12            | 6.34 | 6.71 | 5.61 |
| RAB8A              | 6.34 | 7.08 | 5.04 |

|              |      |      |      |
|--------------|------|------|------|
| TEX35        | 6.34 | 6.86 | 6.04 |
| SSBP2        | 6.34 | 6.67 | 6.08 |
| PPP1R3E      | 6.34 | 6.88 | 5.99 |
| HCP5         | 6.34 | 7.20 | 5.18 |
| EIF4H        | 6.34 | 6.79 | 5.84 |
| FNIP1        | 6.34 | 7.02 | 5.69 |
| LOC100127909 | 6.34 | 6.70 | 5.83 |
| MRPS10       | 6.34 | 6.92 | 5.61 |
| TMUB2        | 6.34 | 6.58 | 6.07 |
| SPATA31C1    | 6.34 | 6.75 | 5.62 |
| LRRC59       | 6.34 | 7.02 | 5.52 |
| RNF214       | 6.34 | 6.54 | 6.14 |
| LOC441454    | 6.34 | 6.68 | 5.81 |
| GUSB         | 6.34 | 6.70 | 5.88 |
| PHF12        | 6.34 | 6.69 | 6.11 |
| APRT         | 6.34 | 6.71 | 5.93 |
| FLNA         | 6.34 | 7.21 | 5.18 |
| DMXL2        | 6.33 | 7.18 | 5.68 |
| ABCF1        | 6.33 | 6.62 | 6.09 |
| AES          | 6.33 | 6.50 | 6.11 |
| CHD8         | 6.33 | 6.79 | 5.74 |
| ARHGAP17     | 6.33 | 6.69 | 5.76 |
| KRTAP10-12   | 6.33 | 6.97 | 5.80 |
| REL          | 6.33 | 6.72 | 6.13 |
| DNAJC21      | 6.33 | 6.95 | 5.83 |
| CHSY1        | 6.33 | 7.02 | 5.66 |
| PRKDC        | 6.33 | 6.74 | 5.80 |
| SCMH1        | 6.33 | 6.84 | 5.71 |
| AHSA1        | 6.33 | 6.71 | 5.79 |
| LOC100509457 | 6.33 | 7.26 | 5.24 |
| MAN2A1       | 6.33 | 7.13 | 5.64 |
| NDUFA4L2     | 6.33 | 6.76 | 5.72 |
| AURKAIP1     | 6.33 | 6.77 | 5.83 |
| IGKV1-9      | 6.33 | 6.91 | 5.73 |
| FAM120B      | 6.33 | 6.58 | 5.36 |
| GABRR2       | 6.33 | 6.60 | 6.09 |
| AGGF1        | 6.33 | 6.80 | 5.81 |
| DNM1         | 6.33 | 6.71 | 5.65 |
| PET100       | 6.33 | 6.70 | 5.92 |
| PLSCR4       | 6.33 | 6.90 | 5.87 |
| DHX32        | 6.33 | 6.70 | 5.96 |
| PRRC2A       | 6.33 | 6.75 | 5.95 |
| VWF          | 6.33 | 7.47 | 4.85 |
| TP53BP1      | 6.33 | 6.58 | 6.07 |
| NFYA         | 6.33 | 6.52 | 5.97 |
| FMR1         | 6.33 | 6.76 | 5.85 |
| NDUFA9       | 6.33 | 6.85 | 5.74 |
| MIR3671      | 6.33 | 6.85 | 5.39 |
| NSD1         | 6.33 | 6.66 | 5.89 |

|          |      |      |      |
|----------|------|------|------|
| RNF19B   | 6.33 | 6.96 | 5.53 |
| PCF11    | 6.33 | 6.87 | 5.36 |
| SAT2     | 6.33 | 6.94 | 5.32 |
| GPSM2    | 6.33 | 7.05 | 5.66 |
| FKBP9    | 6.33 | 6.61 | 5.76 |
| ERLIN1   | 6.33 | 7.17 | 5.19 |
| MEF2C    | 6.33 | 6.70 | 5.64 |
| CERS2    | 6.33 | 6.76 | 5.79 |
| HCFC2    | 6.33 | 6.91 | 5.46 |
| APLNR    | 6.33 | 7.97 | 4.46 |
| CYP1B1   | 6.32 | 7.01 | 5.74 |
| MIR4682  | 6.32 | 6.90 | 6.03 |
| ASH1L    | 6.32 | 6.78 | 5.86 |
| RBL2     | 6.32 | 6.67 | 5.73 |
| MRPS18B  | 6.32 | 6.75 | 6.06 |
| GPR4     | 6.32 | 6.96 | 5.51 |
| SNORD71  | 6.32 | 7.16 | 5.52 |
| TIMM8B   | 6.32 | 6.89 | 5.59 |
| PHC1     | 6.32 | 6.82 | 6.02 |
| FKBP3    | 6.32 | 6.93 | 5.23 |
| FNIP2    | 6.32 | 7.57 | 5.23 |
| CTSO     | 6.32 | 6.86 | 5.28 |
| LDHB     | 6.32 | 6.51 | 6.03 |
| MIR2392  | 6.32 | 7.02 | 5.85 |
| SPDYA    | 6.32 | 6.76 | 5.88 |
| EMC4     | 6.32 | 6.65 | 6.04 |
| RAB8B    | 6.32 | 7.28 | 4.92 |
| IGKV1-16 | 6.32 | 7.21 | 5.72 |
| PQBP1    | 6.32 | 6.60 | 5.95 |
| GSTM3    | 6.32 | 6.76 | 5.52 |
| HDHD2    | 6.32 | 6.70 | 5.84 |
| COPZ1    | 6.32 | 6.65 | 5.81 |
| UFSP2    | 6.32 | 7.00 | 5.85 |
| STMN3    | 6.32 | 6.62 | 6.05 |
| SPCS2    | 6.32 | 6.61 | 5.88 |
| SEPHS1   | 6.32 | 6.63 | 6.05 |
| NIT2     | 6.32 | 6.61 | 5.78 |
| LIN37    | 6.32 | 6.62 | 5.90 |
| RPS29    | 6.32 | 6.46 | 6.13 |
| PTPN13   | 6.32 | 7.00 | 5.66 |
| ANKRD13A | 6.32 | 7.00 | 5.57 |
| NPFF     | 6.32 | 6.59 | 5.65 |
| EFHD2    | 6.32 | 6.60 | 5.98 |
| SH3YL1   | 6.32 | 6.54 | 5.70 |
| RTCA     | 6.32 | 6.79 | 5.64 |
| SUCO     | 6.32 | 6.62 | 5.88 |
| UPK3BL   | 6.32 | 7.11 | 5.91 |
| NSAP11   | 6.32 | 7.05 | 5.53 |
| ISG15    | 6.32 | 7.67 | 5.82 |

|                    |      |      |      |
|--------------------|------|------|------|
| CPNE3              | 6.32 | 6.71 | 5.91 |
| COG7               | 6.32 | 6.67 | 5.89 |
| PHTF2              | 6.31 | 6.91 | 5.25 |
| DPCD               | 6.31 | 6.46 | 5.96 |
| POLR2H             | 6.31 | 6.52 | 5.87 |
| TCEAL2             | 6.31 | 6.87 | 5.71 |
| MIR3180-4          | 6.31 | 6.51 | 6.03 |
| TLR4               | 6.31 | 6.78 | 5.46 |
| CTSC               | 6.31 | 6.92 | 5.98 |
| STEAP2             | 6.31 | 7.50 | 5.72 |
| MIS18BP1           | 6.31 | 6.60 | 5.73 |
| GOLGA6A            | 6.31 | 6.75 | 5.85 |
| RMDN1              | 6.31 | 6.69 | 5.72 |
| GORAB              | 6.31 | 6.72 | 5.66 |
| ACSL3              | 6.31 | 6.70 | 6.02 |
| ZCCHC17            | 6.31 | 6.70 | 5.86 |
| LOC100288162       | 6.31 | 6.62 | 6.05 |
| C1orf27            | 6.31 | 6.78 | 5.54 |
| RBM27              | 6.31 | 6.70 | 5.92 |
| EHD4               | 6.31 | 6.80 | 5.68 |
| NUMA1              | 6.31 | 6.66 | 6.05 |
| STC2               | 6.31 | 8.29 | 4.98 |
| NAT14              | 6.31 | 6.60 | 6.02 |
| CAMK2D             | 6.31 | 6.89 | 5.44 |
| MIR4748            | 6.31 | 6.84 | 5.87 |
| WWTR1              | 6.31 | 6.84 | 5.77 |
| UBE2R2             | 6.31 | 6.84 | 5.65 |
| KIF22              | 6.31 | 6.55 | 6.03 |
| RNF20              | 6.31 | 6.72 | 5.76 |
| RPS25              | 6.31 | 6.48 | 5.86 |
| OTTHUMG00000020320 | 6.31 | 6.97 | 5.90 |
| SLC43A3            | 6.31 | 6.60 | 5.83 |
| RALBP1             | 6.31 | 6.65 | 5.67 |
| MIR486             | 6.31 | 6.67 | 5.73 |
| ARL1               | 6.31 | 6.79 | 5.82 |
| OTTHUMG00000020540 | 6.31 | 6.95 | 5.78 |
| CHID1              | 6.31 | 6.82 | 5.85 |
| RNU7-6P            | 6.31 | 6.81 | 5.97 |
| C4orf32            | 6.31 | 7.32 | 5.19 |
| TMEM87B            | 6.31 | 7.01 | 5.60 |
| NRBF2              | 6.31 | 6.92 | 5.79 |
| ENY2               | 6.31 | 6.79 | 5.84 |
| STX18              | 6.30 | 6.68 | 6.02 |
| SNX7               | 6.30 | 7.19 | 4.85 |
| OTTHUMG00000169787 | 6.30 | 6.64 | 5.82 |
| WISP3              | 6.30 | 7.16 | 5.21 |
| PSMG1              | 6.30 | 6.84 | 5.53 |
| ELP2               | 6.30 | 6.78 | 5.91 |
| ARHGEF10           | 6.30 | 6.76 | 5.50 |

|                    |      |      |      |
|--------------------|------|------|------|
| NCOA2              | 6.30 | 6.64 | 5.84 |
| NARF               | 6.30 | 6.78 | 5.65 |
| RFWD2              | 6.30 | 6.80 | 5.65 |
| SPAG7              | 6.30 | 6.69 | 5.91 |
| C20orf194          | 6.30 | 6.64 | 5.61 |
| IRF9               | 6.30 | 6.58 | 5.98 |
| TCF12              | 6.30 | 6.59 | 5.95 |
| CKAP5              | 6.30 | 7.03 | 5.41 |
| MED23              | 6.30 | 6.57 | 5.86 |
| AGO4               | 6.30 | 6.78 | 5.75 |
| LSM7               | 6.30 | 6.69 | 5.73 |
| ALG8               | 6.30 | 6.75 | 5.86 |
| RNF181             | 6.30 | 6.81 | 5.73 |
| ABLIM1             | 6.30 | 7.12 | 5.80 |
| NDNF               | 6.30 | 7.10 | 4.82 |
| PER3               | 6.30 | 7.40 | 5.41 |
| LMO4               | 6.30 | 6.68 | 5.64 |
| LOC100129027       | 6.30 | 6.86 | 6.05 |
| RNF141             | 6.30 | 6.85 | 5.82 |
| ANGPTL1            | 6.30 | 7.16 | 5.27 |
| GRK5               | 6.30 | 6.68 | 5.43 |
| ARHGDI1            | 6.30 | 6.92 | 5.14 |
| ATP1B1             | 6.30 | 7.13 | 5.29 |
| ZNF302             | 6.30 | 6.90 | 5.61 |
| LAPTM4B            | 6.30 | 6.99 | 5.81 |
| LINC00266-1        | 6.30 | 6.83 | 5.90 |
| AKIRIN2            | 6.30 | 6.77 | 5.67 |
| SH3BP5-AS1         | 6.30 | 6.97 | 5.73 |
| DTX3L              | 6.30 | 6.75 | 5.83 |
| RNU6-83P           | 6.30 | 7.10 | 5.88 |
| HEBP1              | 6.30 | 6.75 | 5.46 |
| IL11RA             | 6.30 | 6.59 | 5.91 |
| OTTHUMG00000020780 | 6.30 | 6.72 | 5.89 |
| LOC100131564       | 6.30 | 6.71 | 5.54 |
| TMEM2              | 6.30 | 6.93 | 5.80 |
| WNT3               | 6.30 | 7.10 | 5.95 |
| DBI                | 6.30 | 6.49 | 6.04 |
| GNAQ               | 6.30 | 6.65 | 5.83 |
| CAND1              | 6.30 | 6.81 | 5.75 |
| IP6K2              | 6.30 | 6.54 | 5.88 |
| RNA5SP70           | 6.30 | 7.05 | 5.82 |
| PRNP               | 6.30 | 6.70 | 5.91 |
| EIF3J-AS1          | 6.29 | 6.63 | 6.01 |
| GAB1               | 6.29 | 6.86 | 5.31 |
| FEM1B              | 6.29 | 6.72 | 5.91 |
| MLH1               | 6.29 | 6.72 | 5.78 |
| ADAMTS6            | 6.29 | 7.32 | 4.93 |
| SMG9               | 6.29 | 6.77 | 5.86 |
| OTTHUMG00000022274 | 6.29 | 6.68 | 5.77 |

|                    |      |      |      |
|--------------------|------|------|------|
| CLDN3              | 6.29 | 6.73 | 5.93 |
| CP                 | 6.29 | 7.00 | 5.84 |
| TM9SF4             | 6.29 | 6.66 | 5.86 |
| RBM12B-AS1         | 6.29 | 6.68 | 5.87 |
| RASA4CP            | 6.29 | 6.75 | 5.77 |
| HEBP2              | 6.29 | 6.69 | 6.03 |
| NQO2               | 6.29 | 6.72 | 5.80 |
| PDLIM7             | 6.29 | 7.08 | 5.85 |
| SDHAP3             | 6.29 | 6.63 | 5.99 |
| LYST               | 6.29 | 6.64 | 5.53 |
| FRYL               | 6.29 | 6.71 | 5.75 |
| PDPK1              | 6.29 | 6.50 | 5.96 |
| CGB                | 6.29 | 6.70 | 5.69 |
| LARP7              | 6.29 | 6.70 | 5.78 |
| SUMF2              | 6.29 | 6.62 | 5.99 |
| UGP2               | 6.29 | 6.79 | 5.69 |
| TAB2               | 6.29 | 6.71 | 5.66 |
| MIR4780            | 6.29 | 6.69 | 5.94 |
| MAST2              | 6.29 | 6.75 | 5.58 |
| OR10P1             | 6.29 | 6.75 | 5.72 |
| MTSS1              | 6.29 | 6.72 | 5.78 |
| EEF1D              | 6.29 | 6.56 | 6.10 |
| FAM96B             | 6.29 | 6.96 | 5.81 |
| SLC33A1            | 6.29 | 6.79 | 5.83 |
| ANKRD36            | 6.29 | 6.71 | 5.63 |
| GOLGA6B            | 6.29 | 6.66 | 5.89 |
| PAPOLA             | 6.29 | 6.57 | 5.61 |
| FOXP1              | 6.29 | 6.90 | 5.76 |
| TALDO1             | 6.29 | 6.44 | 6.10 |
| GMPPA              | 6.29 | 6.69 | 5.91 |
| KDM3B              | 6.29 | 6.74 | 5.66 |
| CEP57              | 6.29 | 6.59 | 5.87 |
| PIAS3              | 6.29 | 6.68 | 5.82 |
| DIDO1              | 6.29 | 6.80 | 5.78 |
| FZD9               | 6.29 | 6.94 | 5.44 |
| MRPL42             | 6.28 | 6.62 | 5.73 |
| NBAS               | 6.28 | 6.64 | 5.77 |
| RING1              | 6.28 | 6.50 | 6.03 |
| C14orf144          | 6.28 | 6.63 | 6.01 |
| USP8               | 6.28 | 6.65 | 5.64 |
| OTTHUMG00000155723 | 6.28 | 6.62 | 5.97 |
| ZNF462             | 6.28 | 6.57 | 5.78 |
| SERPINA5           | 6.28 | 7.70 | 5.34 |
| ABCC1              | 6.28 | 6.66 | 5.71 |
| EFEMP2             | 6.28 | 7.01 | 5.90 |
| CREBZF             | 6.28 | 6.68 | 5.84 |
| KRT18P49           | 6.28 | 7.00 | 5.65 |
| UBR1               | 6.28 | 6.68 | 5.83 |
| CTSZ               | 6.28 | 6.84 | 5.78 |

|                    |      |      |      |
|--------------------|------|------|------|
| COL27A1            | 6.28 | 6.79 | 5.82 |
| FAU                | 6.28 | 6.50 | 6.08 |
| MIER1              | 6.28 | 6.78 | 5.68 |
| CS                 | 6.28 | 6.55 | 5.71 |
| NFE2L2             | 6.28 | 6.76 | 5.51 |
| CETN2              | 6.28 | 6.57 | 5.50 |
| MTPAP              | 6.28 | 6.68 | 5.54 |
| GADD45B            | 6.28 | 7.10 | 5.50 |
| RAB30-AS1          | 6.28 | 6.71 | 5.89 |
| PURA               | 6.28 | 6.47 | 5.99 |
| RBMS3              | 6.28 | 6.77 | 5.81 |
| ALMS1              | 6.28 | 6.52 | 5.98 |
| CERS6              | 6.28 | 6.86 | 5.53 |
| PPRC1              | 6.28 | 6.59 | 5.80 |
| C2orf74            | 6.27 | 6.82 | 5.86 |
| IGLV3-16           | 6.27 | 6.85 | 5.88 |
| APOBEC3B-AS1       | 6.27 | 6.68 | 5.70 |
| SLC35C2            | 6.27 | 6.58 | 5.67 |
| APPBP2             | 6.27 | 6.81 | 5.57 |
| SUMO1P3            | 6.27 | 6.97 | 5.37 |
| PDXDC1             | 6.27 | 6.69 | 5.78 |
| OTTHUMG00000169784 | 6.27 | 6.94 | 5.70 |
| MUT                | 6.27 | 6.98 | 5.62 |
| PAPD7              | 6.27 | 6.77 | 5.79 |
| GFPT2              | 6.27 | 7.09 | 5.18 |
| SNED1              | 6.27 | 6.59 | 5.99 |
| RBMS2              | 6.27 | 6.67 | 5.76 |
| OXSR1              | 6.27 | 6.95 | 5.80 |
| DYNC1I2            | 6.27 | 6.66 | 5.68 |
| MAX                | 6.27 | 6.61 | 5.86 |
| MED4               | 6.27 | 6.74 | 5.47 |
| PPFIA1             | 6.27 | 6.58 | 5.82 |
| LBH                | 6.27 | 6.87 | 5.68 |
| RCOR1              | 6.27 | 6.56 | 5.63 |
| LOC100133039       | 6.27 | 6.43 | 5.99 |
| DZIP3              | 6.27 | 6.61 | 5.82 |
| LOC286367          | 6.27 | 6.80 | 5.83 |
| SLMAP              | 6.27 | 6.59 | 5.85 |
| MRPL3              | 6.27 | 6.73 | 5.79 |
| B4GALT5            | 6.26 | 7.07 | 5.60 |
| SNX17              | 6.26 | 6.58 | 5.75 |
| FKBP2              | 6.26 | 6.54 | 5.74 |
| ZNF585A            | 6.26 | 6.50 | 6.03 |
| KIAA0586           | 6.26 | 6.66 | 6.05 |
| ATP6V1B2           | 6.26 | 7.18 | 5.16 |
| CALHM2             | 6.26 | 6.67 | 5.84 |
| GOLGA2P2Y          | 6.26 | 6.61 | 6.04 |
| TGS1               | 6.26 | 6.66 | 6.01 |
| TM7SF3             | 6.26 | 6.83 | 5.07 |

|                    |      |      |      |
|--------------------|------|------|------|
| EME2               | 6.26 | 6.55 | 5.82 |
| EFTUD2             | 6.26 | 6.66 | 5.69 |
| CWC27              | 6.26 | 6.58 | 5.66 |
| HEATR5B            | 6.26 | 6.67 | 5.76 |
| IL10RB             | 6.26 | 6.79 | 5.69 |
| MIR99A             | 6.26 | 6.85 | 5.31 |
| SPTLC1             | 6.26 | 7.05 | 5.83 |
| TNS1               | 6.26 | 6.52 | 5.68 |
| OTTHUMG00000175906 | 6.26 | 6.63 | 5.75 |
| MRPL15             | 6.26 | 7.10 | 5.50 |
| SSC5D              | 6.26 | 7.32 | 4.95 |
| MMADHC             | 6.26 | 6.85 | 5.82 |
| CACNB1             | 6.26 | 6.69 | 5.76 |
| TMEM173            | 6.26 | 6.64 | 5.85 |
| SYNE1              | 6.26 | 6.71 | 5.53 |
| WDR70              | 6.26 | 6.69 | 6.05 |
| PSMB9              | 6.26 | 6.91 | 5.72 |
| IPO9               | 6.26 | 6.82 | 5.80 |
| IGHEP1             | 6.26 | 6.56 | 5.88 |
| NFX1               | 6.26 | 6.70 | 5.69 |
| CLDND1             | 6.26 | 6.90 | 5.57 |
| OTTHUMG00000170026 | 6.26 | 6.50 | 5.90 |
| PCNX               | 6.26 | 6.68 | 5.63 |
| GMPS               | 6.26 | 6.91 | 5.43 |
| LINC00888          | 6.26 | 7.13 | 5.75 |
| MDC1               | 6.26 | 6.41 | 6.12 |
| SLC7A5P2           | 6.26 | 6.72 | 5.71 |
| GOLGA6L1           | 6.26 | 6.78 | 5.76 |
| TOPORS             | 6.26 | 6.49 | 5.87 |
| PDIA5              | 6.26 | 6.69 | 5.58 |
| EPHX1              | 6.26 | 6.86 | 5.84 |
| COG6               | 6.25 | 6.74 | 5.62 |
| CD53               | 6.25 | 7.52 | 5.92 |
| OTTHUMG00000013949 | 6.25 | 6.68 | 5.72 |
| RNASE6             | 6.25 | 7.29 | 5.31 |
| COL4A1             | 6.25 | 7.36 | 5.69 |
| TTL                | 6.25 | 6.86 | 5.72 |
| HIVEP1             | 6.25 | 6.90 | 5.06 |
| LCE2A              | 6.25 | 6.89 | 5.87 |
| EPB41L3            | 6.25 | 6.75 | 5.73 |
| ZZEF1              | 6.25 | 6.55 | 5.75 |
| NDUFA3             | 6.25 | 6.67 | 5.95 |
| RNU105B            | 6.25 | 6.79 | 5.42 |
| MIR3191            | 6.25 | 7.02 | 5.51 |
| RETSAT             | 6.25 | 6.66 | 5.84 |
| IDH2               | 6.25 | 6.50 | 5.91 |
| NDRG3              | 6.25 | 6.51 | 5.88 |
| PLEKHA3            | 6.25 | 6.76 | 5.65 |
| PEX11B             | 6.25 | 6.45 | 5.93 |



|                     |      |      |      |
|---------------------|------|------|------|
| <i>C17orf62</i>     | 6.25 | 6.50 | 5.82 |
| <i>LOC100996511</i> | 6.25 | 6.60 | 5.11 |
| <i>UQCRC1</i>       | 6.25 | 6.77 | 5.96 |
| <i>FAM57A</i>       | 6.25 | 6.52 | 5.83 |
| <i>TEAD1</i>        | 6.25 | 6.94 | 5.75 |
| <i>CSNK1D</i>       | 6.25 | 6.64 | 5.88 |
| <i>HABP4</i>        | 6.25 | 6.62 | 5.34 |
| <i>PIGB</i>         | 6.25 | 6.56 | 5.65 |
| <i>TCEAL3</i>       | 6.25 | 6.59 | 5.97 |
| <i>TPD52L2</i>      | 6.25 | 7.00 | 5.31 |
| <i>CSAD</i>         | 6.25 | 6.67 | 5.84 |
| <i>RASAL2</i>       | 6.25 | 6.61 | 5.61 |
| <i>GRIFIN</i>       | 6.25 | 6.58 | 5.94 |
| <i>ZBTB44</i>       | 6.25 | 6.53 | 5.92 |
| <i>DDI2</i>         | 6.25 | 6.69 | 5.89 |
| <i>LOC100653515</i> | 6.25 | 6.47 | 6.08 |
| <i>NDUFA12</i>      | 6.25 | 6.57 | 5.82 |
| <i>IDE</i>          | 6.25 | 6.76 | 5.81 |
| <i>SLIT3</i>        | 6.25 | 6.91 | 5.54 |
| <i>LATS1</i>        | 6.25 | 6.74 | 5.70 |
| <i>RPA3</i>         | 6.25 | 6.55 | 5.79 |
| <i>INO80D</i>       | 6.25 | 6.51 | 5.80 |
| <i>C20orf141</i>    | 6.24 | 6.67 | 5.93 |
| <i>TMEM42</i>       | 6.24 | 6.54 | 6.01 |
| <i>SDF4</i>         | 6.24 | 6.62 | 5.32 |
| <i>ZFC3H1</i>       | 6.24 | 6.54 | 5.94 |
| <i>PPP1CB</i>       | 6.24 | 6.55 | 5.71 |
| <i>NAE1</i>         | 6.24 | 6.69 | 5.75 |
| <i>MAP2K6</i>       | 6.24 | 7.20 | 4.61 |
| <i>LIMS3</i>        | 6.24 | 6.77 | 5.69 |
| <i>TUBG2</i>        | 6.24 | 6.64 | 5.43 |
| <i>ECHS1</i>        | 6.24 | 6.60 | 5.73 |
| <i>NFIL3</i>        | 6.24 | 7.05 | 5.22 |
| <i>MIR657</i>       | 6.24 | 6.72 | 5.73 |
| <i>CHCHD10</i>      | 6.24 | 6.39 | 6.04 |
| <i>QRICH1</i>       | 6.24 | 6.46 | 5.52 |
| <i>AQPEP</i>        | 6.24 | 7.20 | 4.02 |
| <i>LMBR1</i>        | 6.24 | 6.76 | 5.89 |
| <i>ANK3</i>         | 6.24 | 7.47 | 4.83 |
| <i>MPP5</i>         | 6.24 | 6.67 | 5.70 |
| <i>RPL27A</i>       | 6.24 | 6.56 | 5.89 |
| <i>EYA3</i>         | 6.24 | 6.75 | 5.73 |
| <i>TMTC1</i>        | 6.24 | 6.86 | 4.95 |
| <i>MBTPS1</i>       | 6.24 | 6.68 | 5.67 |
| <i>RNA5SP20</i>     | 6.24 | 6.46 | 5.59 |
| <i>TAP1</i>         | 6.24 | 6.44 | 5.99 |
| <i>CYBA</i>         | 6.24 | 6.69 | 5.74 |
| <i>MTX3</i>         | 6.24 | 7.04 | 5.68 |
| <i>DUSP22</i>       | 6.24 | 6.63 | 5.53 |

|                    |      |      |      |
|--------------------|------|------|------|
| MIR3151            | 6.24 | 7.26 | 5.59 |
| MRPL16             | 6.24 | 6.65 | 5.76 |
| TOMM20             | 6.24 | 6.41 | 5.80 |
| IER3               | 6.24 | 6.92 | 5.90 |
| FARSA              | 6.24 | 6.65 | 5.89 |
| SOCS5              | 6.24 | 6.57 | 5.93 |
| MAPK3              | 6.24 | 6.54 | 6.00 |
| PRKAB2             | 6.24 | 6.68 | 5.50 |
| LOC100507419       | 6.24 | 7.13 | 5.68 |
| SNORD20            | 6.24 | 6.85 | 5.92 |
| KIAA1279           | 6.23 | 6.55 | 5.87 |
| DYNC2LI1           | 6.23 | 6.73 | 5.59 |
| KIAA0355           | 6.23 | 6.55 | 5.74 |
| STEAP3             | 6.23 | 6.79 | 5.40 |
| LOC400743          | 6.23 | 6.74 | 5.68 |
| NGEF               | 6.23 | 6.55 | 5.89 |
| USE1               | 6.23 | 6.56 | 5.94 |
| IGKV2D-24          | 6.23 | 7.10 | 5.68 |
| KLHL9              | 6.23 | 6.71 | 5.85 |
| PRDM4              | 6.23 | 6.76 | 5.68 |
| LINC00969          | 6.23 | 6.80 | 5.21 |
| SCARNA5            | 6.23 | 7.26 | 5.39 |
| PTPN1              | 6.23 | 6.78 | 5.52 |
| SERP1              | 6.23 | 6.65 | 5.76 |
| RTCB               | 6.23 | 6.58 | 5.84 |
| TSR3               | 6.23 | 6.58 | 5.63 |
| THY1               | 6.23 | 6.62 | 5.50 |
| TMEM50B            | 6.23 | 6.60 | 5.83 |
| S100A1             | 6.23 | 6.67 | 5.47 |
| YTHDC2             | 6.23 | 6.67 | 5.84 |
| HIBADH             | 6.23 | 6.64 | 5.87 |
| SLC25A39           | 6.23 | 6.54 | 5.91 |
| TXNL4A             | 6.23 | 7.25 | 5.18 |
| FAM129B            | 6.23 | 6.68 | 5.59 |
| IGHV2-70           | 6.23 | 7.13 | 5.57 |
| C4orf29            | 6.23 | 6.54 | 5.84 |
| ATN1               | 6.23 | 6.45 | 5.94 |
| MPZL1              | 6.23 | 6.55 | 5.66 |
| SCO2               | 6.23 | 6.58 | 5.83 |
| PDPN               | 6.23 | 6.63 | 5.59 |
| TMEM33             | 6.22 | 6.98 | 5.55 |
| DENND6A            | 6.22 | 6.55 | 5.54 |
| AKAP8L             | 6.22 | 6.44 | 5.97 |
| LOC729739          | 6.22 | 6.61 | 5.71 |
| OTTHUMG00000014139 | 6.22 | 6.78 | 5.67 |
| BRWD1              | 6.22 | 6.70 | 5.55 |
| TAF12              | 6.22 | 6.43 | 6.01 |
| NFYB               | 6.22 | 6.65 | 5.81 |
| DLGAP1-AS1         | 6.22 | 6.45 | 5.49 |

|                    |      |      |      |
|--------------------|------|------|------|
| SYMPK              | 6.22 | 6.48 | 6.08 |
| ARL8A              | 6.22 | 6.54 | 5.79 |
| SNORA79            | 6.22 | 7.13 | 5.24 |
| PRR7               | 6.22 | 6.48 | 5.85 |
| EIF2AK2            | 6.22 | 6.72 | 5.51 |
| OTTHUMG00000018686 | 6.22 | 6.59 | 5.69 |
| IGHV3-16           | 6.22 | 7.42 | 5.62 |
| GNPTAB             | 6.22 | 6.58 | 5.76 |
| C8orf59            | 6.22 | 6.49 | 5.93 |
| HEATR6             | 6.22 | 6.71 | 5.79 |
| DCBLD2             | 6.22 | 6.83 | 5.42 |
| DONSON             | 6.22 | 6.75 | 5.55 |
| FAM197Y2           | 6.22 | 7.50 | 5.07 |
| GSTTP1             | 6.22 | 7.26 | 5.44 |
| PUM2               | 6.22 | 6.73 | 5.56 |
| UBA3               | 6.22 | 6.85 | 5.23 |
| METTL18            | 6.22 | 6.66 | 5.83 |
| SPRR4              | 6.22 | 6.68 | 5.59 |
| OTTHUMG00000019961 | 6.22 | 7.05 | 5.12 |
| RLF                | 6.22 | 6.95 | 5.52 |
| SNORA59A           | 6.22 | 6.68 | 5.78 |
| AKR1B1             | 6.22 | 6.52 | 5.83 |
| SRF                | 6.22 | 6.37 | 5.95 |
| FLJ42351           | 6.22 | 6.70 | 5.70 |
| SNORD62A           | 6.22 | 6.60 | 5.53 |
| IKBIP              | 6.22 | 7.14 | 5.01 |
| SRCAP              | 6.22 | 6.54 | 5.73 |
| NOSIP              | 6.22 | 6.77 | 5.72 |
| DPYSL3             | 6.22 | 6.97 | 5.36 |
| FLJ35934           | 6.22 | 6.63 | 5.84 |
| HCFC1              | 6.22 | 6.58 | 5.88 |
| PTRF               | 6.22 | 6.72 | 5.55 |
| UROD               | 6.22 | 6.40 | 5.99 |
| SUCLG2             | 6.22 | 6.60 | 5.70 |
| RALA               | 6.22 | 6.92 | 5.01 |
| LAMTOR5            | 6.22 | 6.59 | 5.68 |
| ATXN7L3B           | 6.22 | 6.67 | 5.62 |
| NOB1               | 6.22 | 6.62 | 5.69 |
| OTTHUMG00000067148 | 6.22 | 6.89 | 5.68 |
| GTF3C2             | 6.22 | 6.57 | 5.97 |
| GALNT15            | 6.22 | 7.04 | 5.04 |
| TRBV6-5            | 6.22 | 6.88 | 5.77 |
| MIR3978            | 6.22 | 6.65 | 5.71 |
| ZMIZ2              | 6.21 | 6.53 | 5.89 |
| WDR45              | 6.21 | 6.67 | 5.88 |
| USP33              | 6.21 | 6.66 | 5.56 |
| YY1                | 6.21 | 6.50 | 5.60 |
| PRKCI              | 6.21 | 6.85 | 5.48 |
| FAM220A            | 6.21 | 6.56 | 5.96 |

|                           |      |      |      |
|---------------------------|------|------|------|
| <i>RNASE1</i>             | 6.21 | 6.99 | 5.27 |
| <i>GOLGA8S</i>            | 6.21 | 6.49 | 5.76 |
| <i>ACTN1</i>              | 6.21 | 6.74 | 5.69 |
| <i>RAB13</i>              | 6.21 | 6.56 | 5.94 |
| <i>KAL1</i>               | 6.21 | 7.03 | 5.56 |
| <i>RNF103</i>             | 6.21 | 6.55 | 5.76 |
| <i>BCL2L2-PABPN1</i>      | 6.21 | 6.50 | 5.86 |
| <i>FLYWCH1</i>            | 6.21 | 6.52 | 5.78 |
| <i>STK4</i>               | 6.21 | 6.53 | 5.78 |
| <i>MIR4440</i>            | 6.21 | 7.22 | 5.65 |
| <i>RAB27A</i>             | 6.21 | 6.44 | 5.71 |
| <i>LRRC3C</i>             | 6.21 | 6.66 | 5.76 |
| <i>ENDOG</i>              | 6.21 | 6.54 | 5.98 |
| <i>GSN-AS1</i>            | 6.21 | 6.52 | 5.63 |
| <i>TTC19</i>              | 6.21 | 6.48 | 5.76 |
| <i>CEPT1</i>              | 6.21 | 6.57 | 5.74 |
| <i>FKBP11</i>             | 6.21 | 6.41 | 5.90 |
| <i>PRPF38B</i>            | 6.21 | 6.53 | 5.85 |
| <i>PHF2</i>               | 6.21 | 6.68 | 5.92 |
| <i>LPCAT4</i>             | 6.21 | 6.51 | 5.80 |
| <i>OTTHUMG00000159638</i> | 6.21 | 7.33 | 5.87 |
| <i>APPL2</i>              | 6.21 | 7.07 | 5.25 |
| <i>SMEK1</i>              | 6.21 | 6.66 | 5.52 |
| <i>TRIM47</i>             | 6.21 | 6.50 | 5.80 |
| <i>DHRS4L1</i>            | 6.21 | 6.70 | 5.96 |
| <i>GPR107</i>             | 6.21 | 6.42 | 5.86 |
| <i>EIF2D</i>              | 6.21 | 6.54 | 5.59 |
| <i>LOC100128979</i>       | 6.21 | 6.74 | 5.78 |
| <i>NFU1</i>               | 6.21 | 6.46 | 5.93 |
| <i>TNFSF10</i>            | 6.21 | 6.75 | 5.55 |
| <i>CISD3</i>              | 6.21 | 6.66 | 5.68 |
| <i>PSMD14</i>             | 6.21 | 6.89 | 5.42 |
| <i>UBE2D2</i>             | 6.21 | 6.76 | 5.71 |
| <i>SLPI</i>               | 6.21 | 7.65 | 5.15 |
| <i>RPP21</i>              | 6.21 | 6.92 | 5.40 |
| <i>FKBP4</i>              | 6.21 | 6.45 | 5.74 |
| <i>GTF2H1</i>             | 6.21 | 6.48 | 5.69 |
| <i>NREP</i>               | 6.21 | 6.72 | 5.26 |
| <i>TMEM181</i>            | 6.21 | 6.73 | 5.57 |
| <i>PPP4R1</i>             | 6.21 | 6.88 | 5.62 |
| <i>STK25</i>              | 6.20 | 6.54 | 5.80 |
| <i>ZNF747</i>             | 6.20 | 6.59 | 6.03 |
| <i>CRK</i>                | 6.20 | 6.67 | 5.45 |
| <i>DCTD</i>               | 6.20 | 6.52 | 5.86 |
| <i>CNIH</i>               | 6.20 | 6.78 | 5.63 |
| <i>LRP10</i>              | 6.20 | 6.71 | 5.57 |
| <i>DNAJC2</i>             | 6.20 | 6.54 | 5.75 |
| <i>DYNLL1</i>             | 6.20 | 6.56 | 5.88 |
| <i>IARS2</i>              | 6.20 | 6.84 | 5.43 |

|                    |      |      |      |
|--------------------|------|------|------|
| PRKCA              | 6.20 | 6.94 | 5.50 |
| SAMD4A             | 6.20 | 6.75 | 5.53 |
| PDK3               | 6.20 | 6.86 | 5.35 |
| CASP2              | 6.20 | 6.51 | 5.86 |
| BLVRB              | 6.20 | 6.67 | 5.68 |
| KIF4B              | 6.20 | 6.87 | 5.79 |
| KRBOX4             | 6.20 | 6.47 | 5.59 |
| MIR4314            | 6.20 | 6.90 | 5.78 |
| SLC35B3            | 6.20 | 6.85 | 5.61 |
| AATF               | 6.20 | 6.61 | 5.81 |
| B4GALNT3           | 6.20 | 6.51 | 5.93 |
| KIAA0368           | 6.20 | 6.54 | 5.83 |
| LOC100506365       | 6.20 | 6.60 | 5.66 |
| GULP1              | 6.20 | 6.60 | 5.74 |
| MIR1913            | 6.20 | 6.94 | 5.64 |
| MAVS               | 6.20 | 6.47 | 5.73 |
| ZNF395             | 6.20 | 6.58 | 5.85 |
| AACS               | 6.20 | 6.61 | 5.97 |
| IGLV3-9            | 6.20 | 6.62 | 5.84 |
| FUT11              | 6.20 | 6.88 | 5.48 |
| RGS2               | 6.20 | 7.69 | 4.63 |
| GCNT1              | 6.20 | 6.83 | 5.69 |
| KAT2A              | 6.20 | 6.50 | 5.99 |
| MIR214             | 6.20 | 7.35 | 5.31 |
| SIX5               | 6.20 | 6.41 | 5.89 |
| TES                | 6.20 | 6.90 | 5.31 |
| LRPPRC             | 6.20 | 6.57 | 5.62 |
| FIBP               | 6.20 | 6.59 | 5.49 |
| TP53TG3B           | 6.20 | 6.81 | 5.43 |
| TFDP2              | 6.20 | 6.58 | 5.81 |
| UBTD2              | 6.20 | 6.82 | 5.41 |
| BRE                | 6.20 | 6.56 | 5.80 |
| KCTD13             | 6.20 | 6.43 | 5.86 |
| PFKFB3             | 6.20 | 6.90 | 5.12 |
| ATPIF1             | 6.19 | 6.52 | 6.00 |
| TET2               | 6.19 | 6.61 | 5.46 |
| TPT1-AS1           | 6.19 | 6.50 | 5.77 |
| LOC100130876       | 6.19 | 6.64 | 5.75 |
| BRICD5             | 6.19 | 6.62 | 5.83 |
| C4orf48            | 6.19 | 6.74 | 5.71 |
| MAT2B              | 6.19 | 6.35 | 5.80 |
| OTTHUMG00000164175 | 6.19 | 6.82 | 5.83 |
| APBB2              | 6.19 | 6.69 | 5.46 |
| WDR82              | 6.19 | 6.68 | 5.71 |
| PHF17              | 6.19 | 6.86 | 5.93 |
| SPRN               | 6.19 | 6.78 | 5.59 |
| MIR147A            | 6.19 | 6.90 | 5.66 |
| ARID4A             | 6.19 | 6.51 | 5.85 |
| EFNA5              | 6.19 | 6.99 | 5.56 |

|                           |      |      |      |
|---------------------------|------|------|------|
| <i>C7orf73</i>            | 6.19 | 6.58 | 5.82 |
| <i>F5</i>                 | 6.19 | 7.22 | 4.46 |
| <i>TCIRG1</i>             | 6.19 | 6.39 | 5.68 |
| <i>FYB</i>                | 6.19 | 6.97 | 5.50 |
| <i>NDUFS4</i>             | 6.19 | 6.63 | 5.68 |
| <i>CCDC59</i>             | 6.19 | 6.48 | 5.73 |
| <i>AK3</i>                | 6.19 | 6.46 | 5.77 |
| <i>ADAR</i>               | 6.19 | 6.49 | 5.85 |
| <i>NCOA4</i>              | 6.19 | 6.69 | 5.50 |
| <i>ALG13</i>              | 6.19 | 6.57 | 5.58 |
| <i>MRPS22</i>             | 6.19 | 6.41 | 5.75 |
| <i>ACAP2</i>              | 6.19 | 6.66 | 5.60 |
| <i>SNW1</i>               | 6.19 | 6.66 | 5.50 |
| <i>PSPC1</i>              | 6.19 | 6.53 | 5.71 |
| <i>ZNF37BP</i>            | 6.19 | 6.64 | 5.97 |
| <i>TRAPPC3</i>            | 6.19 | 6.65 | 5.67 |
| <i>S100A6</i>             | 6.19 | 6.38 | 5.86 |
| <i>DDHD1</i>              | 6.19 | 6.55 | 5.82 |
| <i>CRYBB3</i>             | 6.19 | 6.62 | 5.88 |
| <i>OTTHUMG00000182493</i> | 6.19 | 7.01 | 5.56 |
| <i>PRPF39</i>             | 6.19 | 6.72 | 5.47 |
| <i>C6orf165</i>           | 6.19 | 6.65 | 5.81 |
| <i>ZNF805</i>             | 6.19 | 6.62 | 5.75 |
| <i>UGGT2</i>              | 6.19 | 6.80 | 5.62 |
| <i>WDR36</i>              | 6.18 | 6.52 | 5.50 |
| <i>BFAR</i>               | 6.18 | 6.77 | 5.54 |
| <i>PTCD3</i>              | 6.18 | 6.40 | 5.86 |
| <i>PPP2CA</i>             | 6.18 | 6.63 | 5.56 |
| <i>GMPR2</i>              | 6.18 | 6.47 | 5.83 |
| <i>ZNF654</i>             | 6.18 | 6.80 | 5.42 |
| <i>TRIM37</i>             | 6.18 | 6.49 | 5.63 |
| <i>HUS1</i>               | 6.18 | 6.53 | 5.53 |
| <i>EPS15L1</i>            | 6.18 | 6.67 | 5.77 |
| <i>GOLGA2P1</i>           | 6.18 | 6.70 | 5.79 |
| <i>LOC645202</i>          | 6.18 | 6.74 | 5.71 |
| <i>CLEC18B</i>            | 6.18 | 6.85 | 5.48 |
| <i>SREK1</i>              | 6.18 | 6.48 | 5.72 |
| <i>SLC23A2</i>            | 6.18 | 6.41 | 5.89 |
| <i>FAM168B</i>            | 6.18 | 6.84 | 5.73 |
| <i>MYO6</i>               | 6.18 | 6.74 | 5.35 |
| <i>SH3PXD2B</i>           | 6.18 | 7.19 | 5.57 |
| <i>UBE2Q2P3</i>           | 6.18 | 6.45 | 5.98 |
| <i>PPP6C</i>              | 6.18 | 6.52 | 5.86 |
| <i>MEGF10</i>             | 6.18 | 6.59 | 5.95 |
| <i>IRF2</i>               | 6.18 | 6.46 | 5.87 |
| <i>FAM27A</i>             | 6.18 | 6.58 | 5.86 |
| <i>PLXND1</i>             | 6.18 | 6.67 | 5.69 |
| <i>SURF2</i>              | 6.18 | 6.62 | 5.70 |
| <i>FAM120A</i>            | 6.18 | 6.52 | 5.61 |

|                    |      |      |      |
|--------------------|------|------|------|
| SMC1A              | 6.18 | 6.90 | 5.50 |
| OFD1               | 6.18 | 6.41 | 5.74 |
| ORC3               | 6.18 | 6.39 | 5.93 |
| BLMH               | 6.18 | 6.70 | 5.41 |
| DLG5               | 6.18 | 6.62 | 5.78 |
| TYW1B              | 6.18 | 6.57 | 5.83 |
| RAB2B              | 6.18 | 6.58 | 5.73 |
| RAD1               | 6.18 | 6.56 | 5.58 |
| ARHGAP21           | 6.18 | 6.84 | 5.34 |
| ATAD1              | 6.18 | 6.45 | 5.47 |
| RNA5SP60           | 6.18 | 6.86 | 5.29 |
| SLC30A1            | 6.18 | 6.64 | 5.35 |
| CILP2              | 6.18 | 6.75 | 5.50 |
| RNF139             | 6.18 | 6.56 | 5.91 |
| C12orf75           | 6.18 | 7.16 | 5.30 |
| AMD1               | 6.18 | 6.71 | 5.56 |
| MAML2              | 6.18 | 6.94 | 5.53 |
| ERVK3-1            | 6.17 | 6.55 | 5.53 |
| C6orf120           | 6.17 | 6.44 | 5.82 |
| DDTL               | 6.17 | 6.74 | 5.74 |
| MRPL20             | 6.17 | 6.46 | 5.73 |
| MESP1              | 6.17 | 6.44 | 6.04 |
| OTTHUMG00000150794 | 6.17 | 7.33 | 5.58 |
| INO80B             | 6.17 | 6.41 | 5.74 |
| R3HDM1             | 6.17 | 6.74 | 5.72 |
| SNORD8             | 6.17 | 6.54 | 5.57 |
| KIF1B              | 6.17 | 6.70 | 5.43 |
| TBX5               | 6.17 | 6.68 | 5.78 |
| KCMF1              | 6.17 | 6.98 | 5.42 |
| TSPAN11            | 6.17 | 6.75 | 5.73 |
| LOC554249          | 6.17 | 6.62 | 5.97 |
| TRIM52             | 6.17 | 6.49 | 5.37 |
| GLIS3              | 6.17 | 7.86 | 5.41 |
| CXCL14             | 6.17 | 7.03 | 4.83 |
| LYL1               | 6.17 | 6.39 | 5.99 |
| OTTHUMG00000155834 | 6.17 | 6.68 | 5.59 |
| ZNF384             | 6.17 | 6.47 | 5.79 |
| NXPH3              | 6.17 | 6.47 | 5.81 |
| MED31              | 6.17 | 6.73 | 5.70 |
| ZFHX3              | 6.17 | 6.84 | 5.41 |
| MRPL39             | 6.17 | 6.62 | 5.49 |
| PPP2R1A            | 6.17 | 6.59 | 5.79 |
| MLX                | 6.17 | 6.48 | 5.49 |
| DGUOK              | 6.17 | 6.48 | 5.74 |
| CCL13              | 6.17 | 6.97 | 5.56 |
| PSMA5              | 6.17 | 6.79 | 5.48 |
| ASAH1              | 6.17 | 6.97 | 5.52 |
| SMIM4              | 6.17 | 6.52 | 5.57 |
| C7orf60            | 6.17 | 6.69 | 5.43 |

|              |      |      |      |
|--------------|------|------|------|
| TNRC6B       | 6.17 | 6.50 | 5.51 |
| LOC100505942 | 6.17 | 6.55 | 5.62 |
| LST1         | 6.17 | 6.58 | 5.77 |
| MTMR3        | 6.17 | 6.39 | 5.57 |
| PCMTD2       | 6.17 | 6.52 | 5.75 |
| ATG2B        | 6.17 | 6.66 | 5.39 |
| SLC2A3       | 6.17 | 7.22 | 5.48 |
| HECTD4       | 6.17 | 6.36 | 5.94 |
| CAMTA2       | 6.17 | 6.38 | 5.91 |
| TBCK         | 6.17 | 6.47 | 5.65 |
| LRIG1        | 6.17 | 6.35 | 5.94 |
| CFDP1        | 6.17 | 6.55 | 5.71 |
| LOXL3        | 6.16 | 6.88 | 5.64 |
| RNF217       | 6.16 | 6.73 | 5.72 |
| IGF2R        | 6.16 | 6.46 | 5.74 |
| FAT4         | 6.16 | 7.06 | 5.02 |
| LOC400541    | 6.16 | 6.95 | 5.62 |
| MTIF2        | 6.16 | 6.52 | 5.86 |
| PLN          | 6.16 | 6.43 | 5.79 |
| VEZT         | 6.16 | 6.58 | 5.63 |
| KPNA2        | 6.16 | 6.80 | 5.67 |
| INPPL1       | 6.16 | 6.52 | 5.65 |
| TMCO1        | 6.16 | 6.64 | 5.51 |
| MIR130B      | 6.16 | 6.95 | 5.60 |
| TRIM65       | 6.16 | 6.45 | 5.89 |
| AASS         | 6.16 | 6.50 | 5.77 |
| C8orf33      | 6.16 | 6.52 | 5.91 |
| CXXC5        | 6.16 | 6.56 | 5.67 |
| MRPL12       | 6.16 | 6.64 | 5.78 |
| ARHGEF6      | 6.16 | 6.52 | 5.56 |
| PHF13        | 6.16 | 6.44 | 6.02 |
| ME1          | 6.16 | 6.60 | 5.53 |
| SLC4A7       | 6.16 | 6.83 | 5.34 |
| GID8         | 6.16 | 6.46 | 5.52 |
| FAM20B       | 6.16 | 6.60 | 5.10 |
| CCDC130      | 6.16 | 6.36 | 5.76 |
| GLUD1        | 6.16 | 6.49 | 5.57 |
| RERG         | 6.16 | 6.96 | 5.35 |
| F2R          | 6.16 | 6.87 | 5.74 |
| GSTT2B       | 6.16 | 6.64 | 5.51 |
| ZNF644       | 6.16 | 6.48 | 5.76 |
| CDK2         | 6.16 | 6.34 | 6.00 |
| MAZ          | 6.16 | 6.48 | 5.84 |
| GPR125       | 6.16 | 6.54 | 5.38 |
| SLC3A2       | 6.16 | 6.70 | 5.71 |
| IMPDH2       | 6.16 | 6.64 | 5.85 |
| NCKAP1L      | 6.16 | 7.41 | 5.46 |
| SLC38A1      | 6.16 | 6.89 | 5.59 |
| SNORA11D     | 6.16 | 6.56 | 5.80 |



|              |      |      |      |
|--------------|------|------|------|
| FAM98A       | 6.16 | 6.74 | 5.48 |
| LINC00623    | 6.16 | 6.40 | 5.77 |
| EXOSC6       | 6.16 | 6.28 | 5.89 |
| GLOD4        | 6.16 | 6.59 | 5.54 |
| SSTR5        | 6.16 | 6.43 | 5.85 |
| MED12        | 6.15 | 6.39 | 5.75 |
| TCEA1        | 6.15 | 6.38 | 5.79 |
| ZYG11B       | 6.15 | 6.84 | 5.56 |
| LOC100505620 | 6.15 | 6.68 | 5.79 |
| IFNA14       | 6.15 | 6.82 | 5.69 |
| SGK3         | 6.15 | 6.42 | 5.88 |
| USP9X        | 6.15 | 6.72 | 5.33 |
| GSK3A        | 6.15 | 6.57 | 5.66 |
| ZFP36L2      | 6.15 | 6.92 | 5.31 |
| FLJ31306     | 6.15 | 6.46 | 5.82 |
| VTA1         | 6.15 | 6.80 | 5.52 |
| PPAPDC1B     | 6.15 | 6.45 | 5.78 |
| FAM162A      | 6.15 | 6.80 | 5.48 |
| FAM27C       | 6.15 | 6.53 | 5.86 |
| ZNF70        | 6.15 | 6.71 | 5.64 |
| TMEM55A      | 6.15 | 6.67 | 5.35 |
| SMURF2       | 6.15 | 6.70 | 5.45 |
| CTAGE4       | 6.15 | 6.46 | 5.95 |
| DGAT1        | 6.15 | 6.47 | 5.67 |
| MBTPS2       | 6.15 | 6.58 | 5.58 |
| RARRES2      | 6.15 | 6.58 | 5.67 |
| MPHOSPH10    | 6.15 | 6.53 | 5.72 |
| SMAD5        | 6.15 | 7.01 | 5.57 |
| PARL         | 6.15 | 6.57 | 5.51 |
| IWS1         | 6.15 | 6.44 | 5.62 |
| SYVN1        | 6.15 | 6.57 | 5.86 |
| WTIP         | 6.15 | 6.35 | 5.92 |
| LOC493754    | 6.15 | 6.56 | 5.69 |
| TMEM106B     | 6.15 | 6.43 | 5.34 |
| HLA-DMA      | 6.15 | 7.11 | 5.74 |
| FKBP15       | 6.15 | 6.59 | 5.54 |
| BDH2         | 6.15 | 6.58 | 5.38 |
| PHYH         | 6.15 | 6.51 | 5.73 |
| FCHO2        | 6.15 | 6.42 | 5.64 |
| MRC1         | 6.15 | 7.12 | 5.19 |
| CHD1L        | 6.15 | 6.89 | 5.55 |
| NBEAL1       | 6.15 | 6.80 | 5.38 |
| ACP5         | 6.14 | 7.25 | 5.48 |
| MTMR10       | 6.14 | 6.73 | 5.57 |
| XPA          | 6.14 | 6.47 | 5.68 |
| ELOVL1       | 6.14 | 6.60 | 5.74 |
| RUNX1T1      | 6.14 | 6.75 | 5.90 |
| PGM2L1       | 6.14 | 7.05 | 5.53 |
| MT1M         | 6.14 | 6.63 | 5.74 |

|           |      |      |      |
|-----------|------|------|------|
| CAMK1     | 6.14 | 6.68 | 5.61 |
| INTS10    | 6.14 | 6.45 | 5.56 |
| FARP1     | 6.14 | 6.75 | 5.43 |
| ZNF704    | 6.14 | 6.74 | 5.67 |
| CLUAP1    | 6.14 | 6.61 | 5.49 |
| FBXL3     | 6.14 | 6.51 | 5.47 |
| UBTF      | 6.14 | 6.42 | 5.58 |
| CYLD      | 6.14 | 6.74 | 5.40 |
| RRAS      | 6.14 | 6.59 | 5.29 |
| VEGFC     | 6.14 | 6.68 | 5.55 |
| PTGIS     | 6.14 | 6.78 | 5.50 |
| CNOT6L    | 6.14 | 6.42 | 5.85 |
| SLC9A9    | 6.14 | 6.59 | 5.29 |
| AGAP6     | 6.14 | 6.54 | 5.20 |
| CD4       | 6.14 | 6.61 | 5.72 |
| FAM120AOS | 6.14 | 6.44 | 5.87 |
| WDR19     | 6.14 | 6.46 | 5.32 |
| CORO1A    | 6.14 | 6.40 | 5.88 |
| MTHFD1    | 6.14 | 6.53 | 5.85 |
| GLYR1     | 6.14 | 6.48 | 5.56 |
| HSPA13    | 6.14 | 7.05 | 5.19 |
| AP3B1     | 6.14 | 6.53 | 5.50 |
| SNX2      | 6.14 | 6.73 | 5.57 |
| CIRH1A    | 6.14 | 6.86 | 5.53 |
| CDK12     | 6.14 | 6.47 | 5.88 |
| TCTA      | 6.14 | 6.41 | 5.96 |
| GM2A      | 6.14 | 6.73 | 5.47 |
| PTGDS     | 6.14 | 7.29 | 5.26 |
| NUP98     | 6.14 | 6.45 | 5.65 |
| SLC35F6   | 6.14 | 6.42 | 5.69 |
| NFIA      | 6.14 | 6.65 | 5.56 |
| ATXN1     | 6.14 | 6.40 | 5.59 |
| MAU2      | 6.14 | 6.36 | 5.85 |
| CDK7      | 6.14 | 6.67 | 5.66 |
| POLE3     | 6.14 | 6.36 | 5.80 |
| MIR483    | 6.13 | 6.59 | 5.58 |
| SLC35E1   | 6.13 | 6.52 | 5.83 |
| TMEM243   | 6.13 | 6.37 | 5.72 |
| RALGAPA1  | 6.13 | 6.60 | 5.72 |
| C9orf142  | 6.13 | 6.59 | 5.79 |
| SURF4     | 6.13 | 6.86 | 5.45 |
| TPM3P9    | 6.13 | 6.60 | 5.77 |
| METTL5    | 6.13 | 6.34 | 5.64 |
| SESN3     | 6.13 | 6.82 | 5.54 |
| HEXIM1    | 6.13 | 6.45 | 5.80 |
| MRPL54    | 6.13 | 6.75 | 5.83 |
| OR11H12   | 6.13 | 6.88 | 5.64 |
| DDX27     | 6.13 | 6.46 | 5.71 |
| RUVBL2    | 6.13 | 6.63 | 5.62 |

|                    |      |      |      |
|--------------------|------|------|------|
| SLC9A8             | 6.13 | 6.42 | 5.60 |
| MROH1              | 6.13 | 6.25 | 5.98 |
| INPP5F             | 6.13 | 6.66 | 5.39 |
| OTTHUMG00000150172 | 6.13 | 7.31 | 5.39 |
| SAMD9L             | 6.13 | 6.75 | 5.51 |
| ADPGK              | 6.13 | 6.71 | 5.15 |
| SRPK2              | 6.13 | 6.53 | 5.44 |
| SLC25A38           | 6.13 | 6.64 | 5.82 |
| JMY                | 6.13 | 6.58 | 5.53 |
| ATF7               | 6.13 | 6.45 | 5.66 |
| TMEM179B           | 6.13 | 6.35 | 5.78 |
| LAMTOR2            | 6.13 | 6.55 | 5.69 |
| ANAPC7             | 6.13 | 6.50 | 5.82 |
| LOC100505909       | 6.13 | 6.91 | 5.65 |
| NAA60              | 6.13 | 6.53 | 5.62 |
| SLIRP              | 6.13 | 6.48 | 5.53 |
| CYGB               | 6.13 | 6.58 | 5.52 |
| IGLV3-25           | 6.13 | 7.09 | 5.48 |
| RBBP4              | 6.13 | 6.45 | 5.75 |
| HIATL1             | 6.13 | 6.53 | 5.44 |
| XRN2               | 6.13 | 6.72 | 5.56 |
| ZXDC               | 6.13 | 6.33 | 5.55 |
| HERC3              | 6.13 | 6.59 | 5.91 |
| SNORD88B           | 6.13 | 6.55 | 5.39 |
| PTPN18             | 6.13 | 6.52 | 5.82 |
| AEBP2              | 6.13 | 6.43 | 5.56 |
| LOC730268          | 6.13 | 6.41 | 5.33 |
| GTPBP1             | 6.13 | 6.48 | 5.76 |
| TIMM21             | 6.13 | 6.75 | 5.71 |
| UFD1L              | 6.13 | 6.51 | 5.66 |
| USP16              | 6.13 | 6.62 | 5.57 |
| VPS29              | 6.13 | 6.59 | 5.49 |
| EPG5               | 6.13 | 6.64 | 5.68 |
| ALDH7A1            | 6.13 | 6.34 | 5.77 |
| LOC100216546       | 6.13 | 6.46 | 5.61 |
| DMXL1              | 6.13 | 6.48 | 5.53 |
| MBD4               | 6.13 | 6.50 | 5.83 |
| LAMTOR4            | 6.12 | 6.38 | 5.86 |
| USP12-AS1          | 6.12 | 6.64 | 5.00 |
| XPNPEP1            | 6.12 | 6.47 | 5.80 |
| PWP1               | 6.12 | 6.85 | 5.47 |
| LOC92249           | 6.12 | 6.46 | 5.84 |
| DHX16              | 6.12 | 6.30 | 5.94 |
| TMEM205            | 6.12 | 6.37 | 5.80 |
| PPARGC1A           | 6.12 | 6.79 | 5.58 |
| GNL2               | 6.12 | 6.60 | 5.71 |
| C9orf89            | 6.12 | 6.38 | 5.51 |
| AMY1A              | 6.12 | 6.44 | 5.62 |
| NSUN5P2            | 6.12 | 6.33 | 5.90 |

|              |      |      |      |
|--------------|------|------|------|
| KIAA1919     | 6.12 | 6.43 | 5.22 |
| XGPY2        | 6.12 | 7.34 | 4.98 |
| LIG4         | 6.12 | 6.50 | 5.66 |
| UBA2         | 6.12 | 6.54 | 5.50 |
| PTPMT1       | 6.12 | 6.50 | 5.27 |
| TBC1D5       | 6.12 | 6.39 | 5.58 |
| CHADL        | 6.12 | 6.92 | 5.37 |
| MED28        | 6.12 | 6.45 | 5.62 |
| SNX13        | 6.12 | 6.36 | 5.53 |
| MCL1         | 6.12 | 6.69 | 5.52 |
| CSPG4P8      | 6.12 | 6.37 | 5.94 |
| SOX12        | 6.12 | 6.63 | 5.84 |
| TUBB2B       | 6.12 | 6.86 | 5.40 |
| LOC642361    | 6.12 | 6.34 | 5.84 |
| IFT74        | 6.12 | 6.54 | 5.50 |
| CCDC93       | 6.12 | 6.47 | 5.47 |
| LSM2         | 6.12 | 6.61 | 5.62 |
| IFNGR2       | 6.12 | 6.52 | 5.44 |
| POU4F3       | 6.12 | 6.81 | 5.74 |
| LOC101060495 | 6.12 | 6.65 | 5.56 |
| LOC100653206 | 6.12 | 6.56 | 5.56 |
| PEAK1        | 6.12 | 6.90 | 5.23 |
| ENSA         | 6.12 | 6.26 | 5.77 |
| SOBP         | 6.12 | 6.70 | 5.39 |
| TERF2        | 6.12 | 6.40 | 5.43 |
| RNU7-35P     | 6.12 | 6.57 | 5.56 |
| SNAPIN       | 6.12 | 6.53 | 5.52 |
| LOC202181    | 6.12 | 6.49 | 5.74 |
| MTOR         | 6.12 | 6.33 | 5.51 |
| RAB11FIP2    | 6.12 | 6.57 | 5.08 |
| KANK2        | 6.12 | 6.44 | 5.73 |
| CCT6A        | 6.12 | 6.66 | 5.34 |
| SERPINI1     | 6.12 | 6.99 | 4.02 |
| ADRB2        | 6.11 | 6.42 | 5.82 |
| GALNT18      | 6.11 | 6.66 | 5.59 |
| RAD23A       | 6.11 | 6.43 | 5.62 |
| OR2L3        | 6.11 | 6.73 | 5.55 |
| GTF2F2       | 6.11 | 6.46 | 5.61 |
| DALRD3       | 6.11 | 6.51 | 5.88 |
| MCEE         | 6.11 | 6.51 | 5.67 |
| ZADH2        | 6.11 | 6.37 | 5.75 |
| ANKRD19P     | 6.11 | 6.42 | 5.83 |
| PDGFC        | 6.11 | 6.99 | 5.31 |
| WDR54        | 6.11 | 6.35 | 5.81 |
| YTHDF1       | 6.11 | 6.38 | 5.86 |
| EIF2B3       | 6.11 | 6.45 | 5.67 |
| MED8         | 6.11 | 6.55 | 5.60 |
| ENOPH1       | 6.11 | 6.72 | 5.65 |
| GGCX         | 6.11 | 6.34 | 5.72 |

|           |      |      |      |
|-----------|------|------|------|
| HIP1      | 6.11 | 6.63 | 5.65 |
| EPHA3     | 6.11 | 7.06 | 4.72 |
| ARL14EP   | 6.11 | 6.46 | 5.72 |
| LINC00471 | 6.11 | 6.68 | 5.71 |
| PTK2      | 6.11 | 6.43 | 5.64 |
| ZSWIM6    | 6.11 | 7.07 | 4.87 |
| PTPRS     | 6.11 | 6.63 | 5.28 |
| MEF2D     | 6.11 | 6.47 | 5.61 |
| ARMCX6    | 6.11 | 6.37 | 5.77 |
| P2RY8     | 6.11 | 6.40 | 5.63 |
| SNRPD3    | 6.11 | 6.48 | 5.72 |
| MFAP5     | 6.11 | 7.24 | 5.27 |
| GPHA2     | 6.11 | 6.48 | 5.73 |
| PRR20A    | 6.11 | 6.86 | 5.59 |
| CDKN1B    | 6.11 | 6.51 | 5.64 |
| TMEM63A   | 6.11 | 6.50 | 5.81 |
| BAG5      | 6.11 | 6.44 | 5.81 |
| COL5A1    | 6.11 | 7.05 | 5.57 |
| STX4      | 6.11 | 6.52 | 5.56 |
| NCOA7     | 6.11 | 6.55 | 5.82 |
| PNP       | 6.11 | 6.41 | 5.80 |
| SKIV2L    | 6.11 | 6.33 | 5.86 |
| PTEN      | 6.11 | 6.60 | 5.31 |
| SAP30BP   | 6.10 | 6.63 | 5.27 |
| TSR1      | 6.10 | 6.56 | 5.78 |
| CLEC11A   | 6.10 | 6.61 | 5.76 |
| MIR107    | 6.10 | 6.57 | 5.51 |
| LOC645513 | 6.10 | 6.58 | 5.47 |
| MIR4686   | 6.10 | 6.53 | 5.69 |
| OAF       | 6.10 | 6.58 | 5.64 |
| MRPL47    | 6.10 | 6.65 | 5.20 |
| PDCD2L    | 6.10 | 6.31 | 5.73 |
| CDK13     | 6.10 | 6.43 | 5.47 |
| ATP1A1    | 6.10 | 6.46 | 5.65 |
| MAPK14    | 6.10 | 6.51 | 5.76 |
| PYGL      | 6.10 | 6.43 | 5.80 |
| RNU11     | 6.10 | 6.59 | 5.45 |
| SDHAF2    | 6.10 | 6.48 | 5.56 |
| NABP2     | 6.10 | 6.43 | 5.82 |
| ERCC3     | 6.10 | 6.43 | 5.73 |
| MIR500B   | 6.10 | 6.66 | 5.63 |
| VEZF1     | 6.10 | 6.63 | 5.28 |
| SNORA38B  | 6.10 | 6.87 | 5.45 |
| RCL1      | 6.10 | 6.48 | 5.70 |
| TDG       | 6.10 | 6.52 | 5.81 |
| BCAS3     | 6.10 | 6.43 | 5.85 |
| SETD1B    | 6.10 | 6.46 | 5.76 |
| TOMM70A   | 6.10 | 6.45 | 5.32 |
| C7orf41   | 6.10 | 6.35 | 5.89 |

|                    |      |      |      |
|--------------------|------|------|------|
| NSUN3              | 6.10 | 6.44 | 5.24 |
| CTAGE9             | 6.10 | 6.49 | 5.61 |
| ADORA2B            | 6.10 | 6.34 | 5.58 |
| TUBE1              | 6.10 | 6.48 | 5.70 |
| OTTHUMG00000032918 | 6.10 | 6.50 | 5.77 |
| VSTM4              | 6.10 | 6.79 | 5.42 |
| RINT1              | 6.10 | 6.63 | 5.56 |
| RPL9               | 6.10 | 6.33 | 5.75 |
| ANO1-AS1           | 6.10 | 6.82 | 5.46 |
| XPC                | 6.10 | 6.46 | 5.51 |
| CALCRL             | 6.10 | 7.27 | 4.16 |
| POLH               | 6.10 | 6.54 | 5.51 |
| TBC1D20            | 6.10 | 6.64 | 5.38 |
| VAMP7              | 6.10 | 6.63 | 5.53 |
| CAPRIN2            | 6.10 | 6.33 | 5.60 |
| LOC100506636       | 6.10 | 6.40 | 5.46 |
| DNAJB6             | 6.10 | 6.31 | 5.81 |
| CEBPD              | 6.10 | 6.50 | 5.81 |
| SNAR-H             | 6.10 | 6.78 | 5.40 |
| SCAND2P            | 6.10 | 6.54 | 5.50 |
| SGMS1              | 6.09 | 6.41 | 5.42 |
| DDX39A             | 6.09 | 6.57 | 5.22 |
| GLT8D1             | 6.09 | 6.57 | 5.35 |
| LZTS2              | 6.09 | 6.43 | 5.75 |
| JPX                | 6.09 | 6.61 | 5.49 |
| ANXA2              | 6.09 | 6.63 | 5.47 |
| PODNL1             | 6.09 | 6.62 | 5.62 |
| ISLR               | 6.09 | 6.98 | 5.03 |
| CNOT8              | 6.09 | 6.78 | 5.63 |
| ABCD4              | 6.09 | 6.27 | 5.71 |
| MRPS25             | 6.09 | 6.61 | 5.73 |
| AHNAK2             | 6.09 | 6.86 | 5.31 |
| DDX47              | 6.09 | 6.30 | 5.81 |
| ZNF718             | 6.09 | 6.33 | 5.76 |
| TGFB3              | 6.09 | 6.69 | 5.41 |
| SLC10A3            | 6.09 | 6.29 | 5.82 |
| CTTNBP2NL          | 6.09 | 6.68 | 5.20 |
| TYW3               | 6.09 | 6.31 | 5.72 |
| STOML2             | 6.09 | 6.33 | 5.60 |
| SORT1              | 6.09 | 6.72 | 5.37 |
| IGHM               | 6.09 | 6.68 | 5.45 |
| CRYGS              | 6.09 | 6.25 | 5.77 |
| EXT2               | 6.09 | 6.40 | 5.48 |
| PXDC1              | 6.09 | 6.41 | 5.47 |
| SARS               | 6.09 | 6.67 | 5.40 |
| SGCA               | 6.09 | 6.46 | 5.69 |
| SLC31A1            | 6.09 | 6.62 | 5.69 |
| RBCK1              | 6.09 | 6.35 | 5.87 |
| ELOVL5             | 6.09 | 6.39 | 5.55 |

|                    |      |      |      |
|--------------------|------|------|------|
| ITGB3              | 6.09 | 7.00 | 5.53 |
| PPP4R2             | 6.09 | 6.56 | 5.58 |
| PPP1R11            | 6.09 | 6.38 | 5.73 |
| TCERG1             | 6.09 | 6.38 | 5.59 |
| SLC35D1            | 6.09 | 6.37 | 5.72 |
| DLST               | 6.09 | 6.60 | 5.45 |
| STX10              | 6.09 | 6.40 | 5.74 |
| ITGA5              | 6.09 | 6.83 | 5.28 |
| RERG-AS1           | 6.09 | 6.69 | 5.51 |
| SIK3-IT1           | 6.09 | 6.84 | 5.46 |
| MIR4688            | 6.09 | 6.42 | 5.65 |
| MED21              | 6.09 | 6.47 | 5.48 |
| OTTHUMG00000002204 | 6.09 | 6.57 | 5.41 |
| PAF1               | 6.09 | 6.34 | 5.74 |
| SEPHS2             | 6.09 | 6.44 | 5.65 |
| HMOX2              | 6.09 | 6.52 | 5.55 |
| STXBP1             | 6.09 | 6.36 | 5.40 |
| DYRK1A             | 6.09 | 6.43 | 5.53 |
| CIDEB              | 6.09 | 6.28 | 5.85 |
| ARMCX4             | 6.09 | 6.49 | 5.77 |
| KPNA3              | 6.09 | 6.70 | 5.57 |
| PRDM5              | 6.09 | 6.43 | 5.66 |
| FNBP1L             | 6.09 | 6.74 | 5.33 |
| FSTL3              | 6.09 | 6.66 | 5.74 |
| FAM134B            | 6.09 | 7.05 | 5.49 |
| AGO3               | 6.09 | 6.43 | 5.28 |
| MTHFD1L            | 6.09 | 6.75 | 5.31 |
| GSR                | 6.09 | 6.99 | 5.25 |
| FNTA               | 6.09 | 6.30 | 5.76 |
| GIGYF2             | 6.09 | 6.34 | 5.72 |
| NNT                | 6.09 | 6.44 | 5.52 |
| ACSL4              | 6.09 | 6.74 | 5.47 |
| DNAJB4             | 6.08 | 6.48 | 5.27 |
| PPP2R5E            | 6.08 | 6.83 | 5.61 |
| FLJ20021           | 6.08 | 6.42 | 5.76 |
| BCAS2              | 6.08 | 6.62 | 5.33 |
| FOXD4L6            | 6.08 | 6.48 | 5.80 |
| C1orf52            | 6.08 | 6.42 | 5.51 |
| ZNRD1              | 6.08 | 6.27 | 5.58 |
| KIF3B              | 6.08 | 6.47 | 5.63 |
| STUB1              | 6.08 | 6.53 | 5.51 |
| MRPS31             | 6.08 | 6.34 | 5.77 |
| C16orf80           | 6.08 | 6.74 | 5.45 |
| KRTAP5-5           | 6.08 | 6.52 | 5.46 |
| CNTROB             | 6.08 | 6.50 | 5.82 |
| CREBL2             | 6.08 | 6.45 | 5.77 |
| FLYWCH2            | 6.08 | 6.33 | 5.77 |
| CD58               | 6.08 | 6.52 | 5.27 |
| AKIRIN1            | 6.08 | 6.32 | 5.63 |

|                    |      |      |      |
|--------------------|------|------|------|
| CPAMD8             | 6.08 | 6.62 | 4.73 |
| MRPL1              | 6.08 | 6.65 | 5.57 |
| ZBTB7A             | 6.08 | 6.29 | 5.71 |
| C10orf118          | 6.08 | 6.45 | 5.39 |
| EAPP               | 6.08 | 6.49 | 5.62 |
| DDX54              | 6.08 | 6.48 | 5.67 |
| NLGN2              | 6.08 | 6.54 | 5.59 |
| FAM208A            | 6.08 | 6.57 | 5.60 |
| RERE               | 6.08 | 6.36 | 5.74 |
| NUP85              | 6.08 | 6.32 | 5.64 |
| EIF2AK1            | 6.08 | 6.54 | 5.58 |
| SFRP4              | 6.08 | 6.88 | 4.69 |
| FBXL14             | 6.08 | 6.46 | 5.34 |
| WDR11              | 6.08 | 6.52 | 5.23 |
| OTTHUMG00000183288 | 6.08 | 6.54 | 5.63 |
| KIRREL-IT1         | 6.08 | 6.58 | 5.35 |
| CUL3               | 6.08 | 6.64 | 5.44 |
| USP25              | 6.08 | 6.52 | 5.38 |
| CDK9               | 6.08 | 6.34 | 5.42 |
| LMOD1              | 6.08 | 6.51 | 5.71 |
| TMED7              | 6.08 | 6.61 | 5.38 |
| DHX29              | 6.08 | 6.56 | 5.56 |
| MAP2K1             | 6.08 | 6.47 | 5.71 |
| RAC2               | 6.08 | 6.45 | 5.63 |
| MAGEF1             | 6.07 | 6.26 | 5.82 |
| OGDH               | 6.07 | 6.42 | 5.28 |
| OTTHUMG00000154838 | 6.07 | 7.91 | 4.66 |
| MUS81              | 6.07 | 6.37 | 5.61 |
| ARL13B             | 6.07 | 6.57 | 5.51 |
| PGM2               | 6.07 | 6.47 | 5.61 |
| LRIG2              | 6.07 | 6.47 | 5.27 |
| DDX52              | 6.07 | 6.45 | 5.62 |
| PRKAR2A            | 6.07 | 6.68 | 5.51 |
| S100A9             | 6.07 | 7.35 | 4.91 |
| FUBP3              | 6.07 | 6.43 | 5.62 |
| WDR5               | 6.07 | 6.37 | 5.65 |
| SENP5              | 6.07 | 6.57 | 5.48 |
| ACBD6              | 6.07 | 6.44 | 5.48 |
| ARAP1-AS1          | 6.07 | 6.46 | 5.60 |
| DEFB128            | 6.07 | 6.72 | 5.53 |
| RSBN1L             | 6.07 | 6.47 | 5.60 |
| MIR4677            | 6.07 | 6.37 | 5.55 |
| PCED1A             | 6.07 | 6.40 | 5.73 |
| DAP3               | 6.07 | 6.36 | 5.66 |
| MRS2               | 6.07 | 6.36 | 5.61 |
| SMR3A              | 6.07 | 6.60 | 5.56 |
| RPS6KA3            | 6.07 | 6.79 | 5.03 |
| MRC2               | 6.07 | 6.65 | 5.74 |
| COA4               | 6.07 | 6.36 | 5.41 |



|                    |      |      |      |
|--------------------|------|------|------|
| SPRR2A             | 6.07 | 6.58 | 5.68 |
| COMMD3             | 6.07 | 6.72 | 5.20 |
| STX12              | 6.07 | 6.41 | 5.48 |
| LOC100132707       | 6.07 | 6.53 | 5.84 |
| PIGU               | 6.07 | 6.46 | 5.51 |
| FTH1               | 6.07 | 6.60 | 5.63 |
| C11orf54           | 6.07 | 6.39 | 5.47 |
| OTTHUMG00000154695 | 6.07 | 6.45 | 5.71 |
| PLD3               | 6.07 | 6.38 | 5.70 |
| LINC00085          | 6.07 | 6.39 | 5.75 |
| MRPS34             | 6.07 | 6.65 | 5.49 |
| MIR1227            | 6.07 | 6.30 | 5.73 |
| GRAPL              | 6.07 | 6.64 | 5.54 |
| SEMA5A             | 6.07 | 6.61 | 5.35 |
| FAM115A            | 6.07 | 6.45 | 5.60 |
| DDX12P             | 6.07 | 6.44 | 5.52 |
| PSMD6-AS2          | 6.07 | 6.49 | 5.52 |
| MRPS35             | 6.07 | 6.70 | 4.94 |
| HNRNPUL2           | 6.07 | 6.41 | 5.54 |
| MSLNL              | 6.07 | 6.63 | 5.71 |
| CABIN1             | 6.07 | 6.36 | 5.74 |
| DDHD2              | 6.07 | 6.46 | 5.40 |
| HEATR1             | 6.06 | 6.43 | 5.72 |
| LHB                | 6.06 | 6.49 | 5.79 |
| CRLF1              | 6.06 | 7.36 | 5.23 |
| RANBP3             | 6.06 | 6.25 | 5.60 |
| CALM2              | 6.06 | 6.38 | 5.61 |
| RUSC1-AS1          | 6.06 | 6.39 | 5.72 |
| SDCBP              | 6.06 | 6.53 | 5.24 |
| CIB1               | 6.06 | 6.71 | 5.32 |
| ATXN3              | 6.06 | 6.46 | 5.22 |
| SEC23IP            | 6.06 | 6.65 | 5.67 |
| DPH3               | 6.06 | 6.34 | 5.62 |
| CDC37L1            | 6.06 | 6.46 | 5.50 |
| PURB               | 6.06 | 6.54 | 5.51 |
| OTTHUMG00000171842 | 6.06 | 6.64 | 5.78 |
| MIR4294            | 6.06 | 6.60 | 5.52 |
| RAB20              | 6.06 | 6.40 | 5.60 |
| SDF2L1             | 6.06 | 6.40 | 5.71 |
| XRCC6              | 6.06 | 6.37 | 5.58 |
| OPHN1              | 6.06 | 6.64 | 5.25 |
| IFT172             | 6.06 | 6.38 | 5.71 |
| MAN2B2             | 6.06 | 6.35 | 5.72 |
| ZNF622             | 6.06 | 6.56 | 5.75 |
| POLR3D             | 6.06 | 6.51 | 5.60 |
| UBE2Q1             | 6.06 | 6.26 | 5.80 |
| C19orf10           | 6.06 | 6.74 | 5.43 |
| DIRC2              | 6.06 | 6.46 | 5.62 |
| CA9                | 6.06 | 7.38 | 5.25 |

|                    |      |      |      |
|--------------------|------|------|------|
| MRP63              | 6.06 | 6.32 | 5.66 |
| CLYBL              | 6.06 | 6.60 | 5.66 |
| ANKAR              | 6.06 | 6.42 | 5.56 |
| ATRN               | 6.06 | 6.54 | 5.39 |
| SH3BP5             | 6.06 | 6.35 | 5.52 |
| ID1                | 6.06 | 6.90 | 5.54 |
| COLGALT1           | 6.06 | 6.48 | 5.52 |
| AGA                | 6.06 | 6.52 | 5.46 |
| CPXM1              | 6.06 | 7.49 | 4.88 |
| POLR2G             | 6.06 | 6.48 | 5.40 |
| MRPS30             | 6.06 | 6.49 | 5.46 |
| LOC550643          | 6.06 | 6.36 | 5.25 |
| SUPT5H             | 6.06 | 6.29 | 5.59 |
| RRP36              | 6.06 | 6.54 | 5.40 |
| SNX1               | 6.06 | 6.30 | 5.51 |
| GSTM5              | 6.06 | 7.05 | 5.41 |
| PIEZO2             | 6.06 | 6.46 | 5.16 |
| TMEM64             | 6.06 | 6.38 | 5.85 |
| OTTHUMG00000169385 | 6.06 | 6.53 | 5.63 |
| MUC20              | 6.06 | 6.74 | 5.32 |
| FAM78B             | 6.06 | 6.37 | 5.54 |
| LOC401127          | 6.06 | 6.56 | 5.82 |
| DNM1P46            | 6.06 | 6.47 | 5.64 |
| SGK196             | 6.06 | 6.30 | 5.66 |
| CC2D2A             | 6.06 | 6.43 | 5.77 |
| SLC6A8             | 6.06 | 6.40 | 5.59 |
| ABL1               | 6.05 | 6.52 | 5.64 |
| METTL14            | 6.05 | 6.34 | 5.62 |
| CASD1              | 6.05 | 6.47 | 5.67 |
| ASH2L              | 6.05 | 6.37 | 5.33 |
| LINC00891          | 6.05 | 6.44 | 5.43 |
| PERP               | 6.05 | 6.44 | 5.49 |
| CCDC84             | 6.05 | 6.16 | 5.87 |
| NINJ2              | 6.05 | 6.28 | 5.81 |
| CXCR4              | 6.05 | 7.97 | 5.19 |
| USP11              | 6.05 | 6.27 | 5.77 |
| FAM195B            | 6.05 | 6.60 | 5.71 |
| FPR3               | 6.05 | 7.96 | 4.61 |
| PABPC4             | 6.05 | 6.44 | 5.53 |
| FAM208B            | 6.05 | 6.31 | 5.63 |
| RPF2               | 6.05 | 6.75 | 5.42 |
| CEP192             | 6.05 | 6.38 | 5.56 |
| SPICE1             | 6.05 | 6.47 | 5.51 |
| CACHD1             | 6.05 | 6.64 | 5.41 |
| CISD1              | 6.05 | 6.61 | 5.63 |
| ARHGEF1            | 6.05 | 6.28 | 5.72 |
| RASSF8             | 6.05 | 6.57 | 5.69 |
| TAF9               | 6.05 | 6.48 | 5.46 |
| SIAH2-AS1          | 6.05 | 6.26 | 5.89 |

|              |      |      |      |
|--------------|------|------|------|
| PPP1R7       | 6.05 | 6.56 | 5.52 |
| USP1         | 6.05 | 6.68 | 5.68 |
| SF3A1        | 6.05 | 6.42 | 5.76 |
| DLK2         | 6.05 | 6.42 | 5.76 |
| GANC         | 6.05 | 6.55 | 5.40 |
| NOL3         | 6.05 | 6.38 | 5.74 |
| VGLL4        | 6.05 | 6.56 | 5.58 |
| ACTR3B       | 6.05 | 6.24 | 5.82 |
| APEX1        | 6.05 | 6.40 | 5.54 |
| SUMO1        | 6.05 | 6.41 | 5.68 |
| ZCCHC14      | 6.05 | 7.06 | 4.81 |
| C16orf70     | 6.05 | 6.50 | 5.36 |
| TRAV12-2     | 6.05 | 6.43 | 5.49 |
| ARRB1        | 6.05 | 6.54 | 5.46 |
| RER1         | 6.05 | 6.40 | 5.30 |
| ZNF28        | 6.05 | 6.52 | 5.62 |
| RPL26L1      | 6.05 | 6.65 | 5.50 |
| SRPRB        | 6.05 | 6.57 | 5.48 |
| HDAC1        | 6.05 | 6.39 | 5.59 |
| SNORA45      | 6.05 | 6.44 | 5.37 |
| LOC100128494 | 6.05 | 6.31 | 5.53 |
| NSMCE4A      | 6.05 | 6.30 | 5.46 |
| COPS7B       | 6.05 | 6.29 | 5.43 |
| PAPD5        | 6.05 | 6.53 | 5.08 |
| DDX49        | 6.05 | 6.25 | 5.70 |
| EXOSC7       | 6.05 | 6.54 | 5.63 |
| ZDHHC16      | 6.05 | 6.34 | 5.55 |
| RPL35        | 6.05 | 6.26 | 5.84 |
| KPNA6        | 6.05 | 6.47 | 5.74 |
| COL16A1      | 6.04 | 6.60 | 5.45 |
| HMGXB4       | 6.04 | 6.63 | 5.77 |
| KLF7         | 6.04 | 7.00 | 5.10 |
| ECE1         | 6.04 | 6.44 | 5.34 |
| LOC145783    | 6.04 | 6.52 | 5.46 |
| C9orf3       | 6.04 | 6.45 | 5.53 |
| LOC439994    | 6.04 | 6.60 | 5.70 |
| RNU1-23P     | 6.04 | 6.86 | 5.48 |
| KLHL42       | 6.04 | 6.84 | 5.37 |
| PUM1         | 6.04 | 6.51 | 5.24 |
| SPRY2        | 6.04 | 6.39 | 5.42 |
| ATP13A3      | 6.04 | 6.58 | 5.43 |
| CKS1B        | 6.04 | 6.22 | 5.78 |
| KCNT2        | 6.04 | 6.52 | 4.80 |
| CHTF8        | 6.04 | 6.63 | 5.29 |
| MIR210HG     | 6.04 | 6.64 | 5.45 |
| LTBP3        | 6.04 | 6.46 | 5.66 |
| DEDD         | 6.04 | 6.40 | 5.77 |
| GCC2         | 6.04 | 6.33 | 5.57 |
| WRN          | 6.04 | 6.46 | 5.56 |

|                    |      |      |      |
|--------------------|------|------|------|
| ZNF286B            | 6.04 | 6.40 | 5.70 |
| NPR2               | 6.04 | 6.52 | 5.75 |
| ERH                | 6.04 | 6.34 | 5.66 |
| ZNF621             | 6.04 | 6.32 | 5.32 |
| CSPP1              | 6.04 | 6.43 | 5.69 |
| FAF1               | 6.04 | 6.48 | 5.74 |
| ZDHHC12            | 6.04 | 6.39 | 5.59 |
| ARMCX3             | 6.04 | 6.47 | 5.36 |
| DDB2               | 6.04 | 6.49 | 5.18 |
| TRIM4              | 6.04 | 6.33 | 5.54 |
| CDYL               | 6.04 | 6.27 | 5.83 |
| WEE1               | 6.04 | 6.74 | 5.51 |
| RNA5SP151          | 6.04 | 6.58 | 5.59 |
| ACTL6A             | 6.04 | 6.62 | 5.53 |
| UBLCP1             | 6.04 | 6.60 | 5.24 |
| SSBP3              | 6.04 | 6.25 | 5.63 |
| OTTHUMG00000172117 | 6.04 | 6.54 | 5.66 |
| USP14              | 6.04 | 6.72 | 5.40 |
| ARMC10             | 6.04 | 6.66 | 5.56 |
| R3HCC1             | 6.04 | 6.54 | 5.58 |
| ZNF526             | 6.04 | 6.20 | 5.76 |
| OTTHUMG00000170338 | 6.04 | 6.45 | 5.56 |
| ADAM19             | 6.04 | 6.62 | 5.75 |
| PTPRJ              | 6.04 | 6.88 | 5.54 |
| FAM127B            | 6.04 | 6.48 | 5.40 |
| TPD52L1            | 6.04 | 6.30 | 5.68 |
| PAK2               | 6.03 | 6.60 | 5.33 |
| SERPINH1           | 6.03 | 6.51 | 5.48 |
| MIR3941            | 6.03 | 6.99 | 5.32 |
| SLC7A5P1           | 6.03 | 6.33 | 5.28 |
| LOC100132832       | 6.03 | 6.95 | 5.69 |
| SMAD9-AS1          | 6.03 | 6.75 | 5.57 |
| NAGK               | 6.03 | 6.86 | 5.12 |
| SNORD114-21        | 6.03 | 7.50 | 5.28 |
| FOXO3              | 6.03 | 6.43 | 5.42 |
| MSH5               | 6.03 | 6.42 | 5.73 |
| NUP188             | 6.03 | 6.46 | 5.67 |
| REV1               | 6.03 | 6.36 | 5.17 |
| CPSF7              | 6.03 | 6.51 | 5.55 |
| METTL3             | 6.03 | 6.37 | 5.38 |
| HYOU1              | 6.03 | 6.35 | 5.55 |
| RRAGD              | 6.03 | 6.46 | 5.48 |
| RPL23AP64          | 6.03 | 6.63 | 5.76 |
| TMEM53             | 6.03 | 6.29 | 5.65 |
| MFF                | 6.03 | 6.44 | 5.46 |
| TOR1A              | 6.03 | 6.55 | 5.55 |
| UXS1               | 6.03 | 6.21 | 5.76 |
| DCTN1              | 6.03 | 6.36 | 5.58 |
| M6PR               | 6.03 | 6.39 | 5.64 |

|                    |      |      |      |
|--------------------|------|------|------|
| PRC1               | 6.03 | 6.63 | 5.44 |
| PDHA1              | 6.03 | 6.20 | 5.74 |
| RC3H2              | 6.03 | 6.61 | 5.57 |
| HYI                | 6.03 | 6.54 | 5.76 |
| PMS2P4             | 6.03 | 6.44 | 5.73 |
| CISD2              | 6.03 | 6.53 | 5.30 |
| MPI                | 6.03 | 6.51 | 5.77 |
| FAM90A7P           | 6.03 | 6.42 | 5.85 |
| ATG7               | 6.03 | 6.26 | 5.70 |
| TMEM237            | 6.03 | 6.27 | 5.65 |
| KANK3              | 6.03 | 6.71 | 5.33 |
| C14orf2            | 6.03 | 6.28 | 5.64 |
| ADD3               | 6.03 | 6.63 | 5.12 |
| TAOK3              | 6.03 | 6.44 | 5.46 |
| MZT1               | 6.03 | 6.64 | 5.46 |
| ETFDH              | 6.03 | 6.54 | 5.73 |
| TAF2               | 6.03 | 6.37 | 5.21 |
| MLLT11             | 6.03 | 6.58 | 5.67 |
| MPPE1              | 6.03 | 6.67 | 5.38 |
| HOXB2              | 6.03 | 6.65 | 5.70 |
| MIR943             | 6.03 | 6.24 | 5.79 |
| PRR12              | 6.03 | 6.41 | 5.68 |
| SLC25A27           | 6.03 | 6.46 | 5.13 |
| ANKRD52            | 6.03 | 6.52 | 5.52 |
| SLC11A2            | 6.03 | 6.36 | 5.58 |
| PROSER1            | 6.03 | 6.74 | 5.40 |
| KLHL20             | 6.03 | 6.49 | 5.57 |
| KIR3DL2            | 6.03 | 6.54 | 5.53 |
| RAB9A              | 6.03 | 6.73 | 5.44 |
| OTTHUMG00000041435 | 6.03 | 6.45 | 5.31 |
| MRPS17             | 6.03 | 6.58 | 5.60 |
| DHRS3              | 6.02 | 6.54 | 5.37 |
| FOLR2              | 6.02 | 6.85 | 4.88 |
| MIR181D            | 6.02 | 6.53 | 5.76 |
| SART3              | 6.02 | 6.35 | 5.62 |
| ACCS               | 6.02 | 6.52 | 5.65 |
| CRYZL1             | 6.02 | 6.44 | 5.61 |
| LOC651959          | 6.02 | 6.71 | 5.51 |
| OVOL2              | 6.02 | 6.64 | 5.50 |
| HMGA1              | 6.02 | 6.33 | 5.31 |
| DNAJC14            | 6.02 | 6.45 | 5.60 |
| EPN2               | 6.02 | 6.43 | 5.35 |
| CHST15             | 6.02 | 6.60 | 5.19 |
| ARV1               | 6.02 | 6.27 | 5.42 |
| LYPLAL1            | 6.02 | 6.48 | 5.42 |
| UBE2Q2             | 6.02 | 7.00 | 5.28 |
| SNRPB              | 6.02 | 6.57 | 5.54 |
| CCDC94             | 6.02 | 6.42 | 5.57 |
| AKAP8              | 6.02 | 6.22 | 5.66 |

|                    |      |      |      |
|--------------------|------|------|------|
| BABAM1             | 6.02 | 6.42 | 5.61 |
| MIR4288            | 6.02 | 6.63 | 5.33 |
| PXMP2              | 6.02 | 6.12 | 5.83 |
| OTTHUMG00000163795 | 6.02 | 6.71 | 5.64 |
| STRN               | 6.02 | 6.37 | 5.30 |
| DCAF5              | 6.02 | 6.49 | 5.26 |
| CCND2              | 6.02 | 6.27 | 5.73 |
| CUL4B              | 6.02 | 6.40 | 5.44 |
| MIR3178            | 6.02 | 6.28 | 5.76 |
| TVP23C-CDRT4       | 6.02 | 6.63 | 5.50 |
| ATP2C1             | 6.02 | 6.46 | 5.14 |
| FCF1               | 6.02 | 6.73 | 5.25 |
| DENR               | 6.02 | 6.55 | 5.52 |
| WASF3              | 6.02 | 6.41 | 5.72 |
| LOC100507580       | 6.02 | 6.79 | 3.54 |
| NHP2               | 6.02 | 6.29 | 5.58 |
| LOC284191          | 6.02 | 6.36 | 5.67 |
| G6PC3              | 6.02 | 6.56 | 5.41 |
| GMEB1              | 6.02 | 6.32 | 5.71 |
| NFXL1              | 6.02 | 6.31 | 5.57 |
| BCL10              | 6.02 | 6.51 | 5.33 |
| WDR77              | 6.02 | 6.32 | 5.53 |
| PSMD2              | 6.02 | 6.47 | 5.74 |
| FAM105B            | 6.02 | 6.41 | 5.43 |
| GSTK1              | 6.02 | 6.49 | 5.47 |
| RNU7-72P           | 6.02 | 6.61 | 5.61 |
| CHST3              | 6.02 | 6.46 | 5.68 |
| ASXL1              | 6.02 | 6.31 | 5.51 |
| ANKRD26            | 6.02 | 6.49 | 5.61 |
| LOC100506302       | 6.02 | 6.50 | 5.66 |
| SLC25A30           | 6.02 | 6.38 | 5.27 |
| KANSL1             | 6.02 | 6.50 | 5.31 |
| VPS13A             | 6.02 | 6.46 | 5.34 |
| TEX10              | 6.02 | 6.31 | 5.55 |
| WBSCR22            | 6.02 | 6.17 | 5.86 |
| CDK14              | 6.02 | 6.33 | 5.48 |
| MRPS11             | 6.02 | 6.36 | 5.68 |
| PLEKHA4            | 6.02 | 6.38 | 5.64 |
| SLU7               | 6.02 | 6.44 | 5.44 |
| APOL6              | 6.02 | 6.54 | 5.25 |
| TBX4               | 6.02 | 6.48 | 5.33 |
| PSMG3              | 6.02 | 6.32 | 5.64 |
| C10orf11           | 6.02 | 6.64 | 5.52 |
| ZYX                | 6.02 | 6.40 | 5.49 |
| LOC100131541       | 6.02 | 6.51 | 5.61 |
| MGC24103           | 6.02 | 7.43 | 4.71 |
| NCK1               | 6.01 | 6.41 | 5.60 |
| CHTOP              | 6.01 | 6.32 | 5.53 |
| MTA2               | 6.01 | 6.35 | 5.68 |

|                    |      |      |      |
|--------------------|------|------|------|
| HSPB6              | 6.01 | 6.62 | 5.63 |
| MFSD10             | 6.01 | 6.32 | 5.80 |
| TNFRSF21           | 6.01 | 6.55 | 5.65 |
| B3GNT2             | 6.01 | 6.28 | 5.40 |
| SULT1A2            | 6.01 | 6.52 | 5.55 |
| PPIL3              | 6.01 | 6.35 | 5.48 |
| MMGT1              | 6.01 | 6.73 | 4.86 |
| SNHG12             | 6.01 | 6.49 | 5.46 |
| CGGBP1             | 6.01 | 6.39 | 5.36 |
| HK1                | 6.01 | 6.40 | 5.82 |
| MSRB2              | 6.01 | 6.28 | 5.62 |
| MIR665             | 6.01 | 6.28 | 5.54 |
| ZNF623             | 6.01 | 6.47 | 5.73 |
| MIR105-1           | 6.01 | 6.48 | 5.49 |
| KRT16P3            | 6.01 | 6.97 | 5.52 |
| KIAA0754           | 6.01 | 6.37 | 5.44 |
| SIK3               | 6.01 | 6.42 | 5.38 |
| HCG9               | 6.01 | 6.33 | 5.64 |
| EXOC5              | 6.01 | 6.53 | 5.41 |
| LOC441426          | 6.01 | 6.88 | 5.65 |
| TMBIM4             | 6.01 | 6.23 | 5.54 |
| PCSK1N             | 6.01 | 6.42 | 5.66 |
| DCAKD              | 6.01 | 6.50 | 5.39 |
| TRIM13             | 6.01 | 6.31 | 5.45 |
| RSPRY1             | 6.01 | 6.69 | 5.39 |
| POLR1E             | 6.01 | 6.19 | 5.58 |
| NCOR2              | 6.01 | 6.27 | 5.35 |
| C10orf76           | 6.01 | 6.58 | 5.48 |
| EI24               | 6.01 | 6.38 | 5.81 |
| CWC22              | 6.01 | 6.70 | 5.42 |
| TOP3A              | 6.01 | 6.29 | 5.44 |
| NAB1               | 6.01 | 6.42 | 5.56 |
| DOCK9              | 6.01 | 6.41 | 5.26 |
| SGTB               | 6.01 | 6.63 | 5.61 |
| COPS4              | 6.01 | 6.59 | 5.39 |
| NINJ1              | 6.01 | 6.44 | 5.37 |
| LOC283335          | 6.01 | 6.36 | 5.67 |
| LOC100293044       | 6.01 | 6.51 | 5.66 |
| SF3A2              | 6.01 | 6.45 | 5.67 |
| LOC100506217       | 6.01 | 7.13 | 4.81 |
| OTTHUMG00000171012 | 6.01 | 6.36 | 5.79 |
| STRC               | 6.01 | 6.61 | 5.53 |
| BTBD2              | 6.01 | 6.51 | 5.54 |
| RSF1               | 6.01 | 6.33 | 5.07 |
| PCDH18             | 6.01 | 6.76 | 4.73 |
| PCID2              | 6.01 | 6.46 | 5.38 |
| SFSWAP             | 6.01 | 6.25 | 5.59 |
| GOSR2              | 6.01 | 6.36 | 5.61 |
| SDHB               | 6.01 | 6.38 | 5.62 |

|                    |      |      |      |
|--------------------|------|------|------|
| MRPS15             | 6.01 | 6.22 | 5.56 |
| NDUFS3             | 6.01 | 6.35 | 5.55 |
| MIR4731            | 6.01 | 6.65 | 5.35 |
| LINC00094          | 6.01 | 6.39 | 5.60 |
| THAP1              | 6.01 | 6.57 | 5.59 |
| ADAMTS9-AS2        | 6.01 | 6.32 | 5.53 |
| NDST2              | 6.01 | 6.31 | 5.47 |
| MITD1              | 6.01 | 6.43 | 5.41 |
| BTN2A1             | 6.01 | 6.46 | 5.46 |
| MIR4638            | 6.01 | 6.47 | 5.78 |
| HCST               | 6.01 | 6.45 | 5.77 |
| NUMB               | 6.00 | 6.29 | 5.72 |
| PAR-SN             | 6.00 | 6.38 | 5.75 |
| PSME2              | 6.00 | 6.25 | 5.71 |
| PIP4K2C            | 6.00 | 6.30 | 5.65 |
| OSBPL3             | 6.00 | 6.75 | 5.30 |
| FOXN2              | 6.00 | 6.40 | 5.45 |
| PRMT2              | 6.00 | 6.56 | 5.28 |
| ZFP36L1            | 6.00 | 6.26 | 5.71 |
| CSPG4              | 6.00 | 6.15 | 5.78 |
| SUZ12              | 6.00 | 6.52 | 5.47 |
| GJC1               | 6.00 | 6.66 | 5.57 |
| EXOC4              | 6.00 | 6.31 | 5.53 |
| SAMD10             | 6.00 | 6.48 | 5.53 |
| ERICH1             | 6.00 | 6.39 | 5.71 |
| SLC9A3R2           | 6.00 | 6.32 | 5.71 |
| TOX4               | 6.00 | 6.32 | 5.79 |
| TMA16              | 6.00 | 6.47 | 5.55 |
| VWA9               | 6.00 | 6.51 | 5.32 |
| PCNT               | 6.00 | 6.23 | 5.46 |
| STAG3L2            | 6.00 | 6.35 | 5.45 |
| PSMC4              | 6.00 | 6.36 | 5.47 |
| MAPK9              | 6.00 | 6.28 | 5.44 |
| MIR4642            | 6.00 | 6.30 | 5.76 |
| TAOK2              | 6.00 | 6.20 | 5.78 |
| VCIPI1             | 6.00 | 6.41 | 5.17 |
| DUSP10             | 6.00 | 6.77 | 4.91 |
| CRYAB              | 6.00 | 6.46 | 5.61 |
| SLC2A4RG           | 6.00 | 6.31 | 5.74 |
| NLRP1              | 6.00 | 6.33 | 5.70 |
| MED16              | 6.00 | 6.32 | 5.62 |
| WBP2               | 6.00 | 6.33 | 5.41 |
| TCF3               | 6.00 | 6.18 | 5.83 |
| RNA5SP256          | 6.00 | 6.56 | 5.19 |
| C4B                | 6.00 | 6.43 | 5.74 |
| DCUN1D4            | 6.00 | 6.46 | 5.36 |
| OTTHUMG00000149885 | 6.00 | 6.41 | 5.64 |
| MIR23B             | 6.00 | 6.49 | 5.24 |
| TBC1D3B            | 6.00 | 6.29 | 5.69 |



|              |      |      |      |
|--------------|------|------|------|
| DPY19L4      | 6.00 | 6.41 | 5.60 |
| TEKT4P2      | 6.00 | 6.50 | 5.49 |
| ZSCAN2       | 6.00 | 6.21 | 5.74 |
| LOC100652768 | 6.00 | 6.34 | 5.61 |
| ISM2         | 6.00 | 6.67 | 5.50 |
| AK4          | 6.00 | 6.39 | 5.56 |
| TMEM120A     | 6.00 | 6.34 | 5.70 |
| RSBN1        | 5.99 | 6.25 | 5.74 |
| ANKDD1A      | 5.99 | 6.27 | 5.71 |
| CREB5        | 5.99 | 6.39 | 5.57 |
| ITFG2        | 5.99 | 6.39 | 5.62 |
| XPO5         | 5.99 | 6.53 | 5.59 |
| LILRB4       | 5.99 | 6.54 | 5.29 |
| PRKAG1       | 5.99 | 6.31 | 5.34 |
| GCSHP3       | 5.99 | 6.39 | 5.36 |
| TBC1D4       | 5.99 | 6.28 | 5.31 |
| NDUFB9       | 5.99 | 6.26 | 5.42 |
| AGO2         | 5.99 | 6.22 | 5.65 |
| POU2F1       | 5.99 | 6.24 | 5.64 |
| MCM6         | 5.99 | 6.53 | 5.44 |
| MYL12A       | 5.99 | 6.40 | 5.55 |
| IGKV5-2      | 5.99 | 6.63 | 5.23 |
| DHX8         | 5.99 | 6.32 | 5.56 |
| SLC35A1      | 5.99 | 6.33 | 5.66 |
| RNU7-45P     | 5.99 | 6.48 | 5.48 |
| GXYLT2       | 5.99 | 7.51 | 4.34 |
| ZSWIM8       | 5.99 | 6.27 | 5.25 |
| IKZF5        | 5.99 | 6.67 | 5.14 |
| SCAMP3       | 5.99 | 6.51 | 5.56 |
| ADHFE1       | 5.99 | 6.76 | 5.33 |
| RLIM         | 5.99 | 6.60 | 5.34 |
| ZNF655       | 5.99 | 6.34 | 5.30 |
| PCGF5        | 5.99 | 6.41 | 5.45 |
| EML1         | 5.99 | 6.74 | 5.27 |
| TRAJ48       | 5.99 | 6.82 | 5.66 |
| CHD6         | 5.99 | 6.25 | 5.54 |
| ZNF414       | 5.99 | 6.31 | 5.68 |
| HSPE1-MOB4   | 5.99 | 6.29 | 5.53 |
| TMEM184B     | 5.99 | 6.40 | 5.60 |
| ZFP112       | 5.99 | 6.25 | 5.76 |
| TCP11L2      | 5.99 | 6.48 | 5.13 |
| GALK1        | 5.99 | 6.32 | 5.75 |
| JAM3         | 5.99 | 6.29 | 5.22 |
| SYT11        | 5.99 | 7.01 | 5.24 |
| GRB2         | 5.99 | 6.52 | 5.55 |
| PEX3         | 5.99 | 6.29 | 5.21 |
| LOC100130428 | 5.99 | 6.71 | 5.61 |
| TUT1         | 5.99 | 6.29 | 5.63 |
| GIT2         | 5.99 | 6.42 | 5.36 |

|                    |      |      |      |
|--------------------|------|------|------|
| HEATR5A            | 5.99 | 6.40 | 5.75 |
| PPP2R2D            | 5.99 | 6.56 | 5.39 |
| WDR61              | 5.99 | 6.27 | 5.63 |
| TSR2               | 5.99 | 6.61 | 4.94 |
| SP2                | 5.99 | 6.19 | 5.73 |
| SCARNA22           | 5.99 | 6.24 | 5.68 |
| GUCA2B             | 5.99 | 6.58 | 5.27 |
| TIAM2              | 5.99 | 6.51 | 5.51 |
| ASNSD1             | 5.99 | 6.67 | 5.31 |
| PDCD7              | 5.98 | 6.23 | 5.53 |
| CEP170             | 5.98 | 6.60 | 5.25 |
| OTTHUMG00000008920 | 5.98 | 7.08 | 4.25 |
| TMEM220            | 5.98 | 6.27 | 5.53 |
| DNPH1              | 5.98 | 6.25 | 5.79 |
| ELAVL1             | 5.98 | 6.40 | 5.57 |
| CPED1              | 5.98 | 6.47 | 5.28 |
| ZNF264             | 5.98 | 6.51 | 5.58 |
| KIF26A             | 5.98 | 6.44 | 5.75 |
| NFKB1              | 5.98 | 6.48 | 5.45 |
| SGK110             | 5.98 | 6.32 | 5.71 |
| FAM13B             | 5.98 | 6.27 | 5.55 |
| KIAA2013           | 5.98 | 6.23 | 5.61 |
| CHMP4A             | 5.98 | 6.40 | 5.47 |
| GSTT1              | 5.98 | 6.51 | 5.82 |
| DGCR11             | 5.98 | 6.58 | 5.51 |
| OR2T12             | 5.98 | 6.38 | 5.66 |
| VPS13D             | 5.98 | 6.44 | 5.32 |
| HADH               | 5.98 | 6.28 | 5.51 |
| HDAC8              | 5.98 | 6.40 | 5.26 |
| FAM20C             | 5.98 | 6.37 | 5.43 |
| SAMD4B             | 5.98 | 6.22 | 5.67 |
| RAI2               | 5.98 | 6.40 | 5.46 |
| SIGLEC1            | 5.98 | 6.34 | 5.54 |
| PILRA              | 5.98 | 7.04 | 5.60 |
| NAP1L4             | 5.98 | 6.43 | 5.23 |
| MTERFD2            | 5.98 | 6.45 | 5.57 |
| TM4SF1             | 5.98 | 6.51 | 5.08 |
| POMGNT1            | 5.98 | 6.21 | 5.73 |
| ITGA9              | 5.98 | 6.18 | 5.76 |
| PPM1G              | 5.98 | 6.52 | 5.06 |
| PLEKHM2            | 5.98 | 6.31 | 5.59 |
| KIAA0391           | 5.98 | 6.48 | 5.29 |
| ASMTL-AS1          | 5.98 | 6.18 | 5.74 |
| SSFA2              | 5.98 | 6.67 | 5.44 |
| ZNF606             | 5.98 | 6.23 | 5.40 |
| RPA2               | 5.98 | 6.35 | 5.57 |
| COPS5              | 5.98 | 6.26 | 5.66 |
| OPA1               | 5.98 | 6.65 | 5.45 |
| EP400              | 5.98 | 6.24 | 5.34 |

|                    |      |      |      |
|--------------------|------|------|------|
| PLIN5              | 5.98 | 6.25 | 5.77 |
| NDUFAF2            | 5.98 | 6.41 | 5.47 |
| LOC100129034       | 5.98 | 6.57 | 5.16 |
| SLC7A2             | 5.98 | 6.47 | 5.29 |
| ZSWIM7             | 5.98 | 6.37 | 4.87 |
| SEBOX              | 5.98 | 6.49 | 5.50 |
| KRAS               | 5.98 | 6.49 | 5.42 |
| PSMG2              | 5.98 | 6.35 | 5.09 |
| OCEL1              | 5.98 | 6.22 | 5.78 |
| CECR6              | 5.98 | 6.20 | 5.63 |
| SPPL3              | 5.98 | 6.30 | 5.43 |
| OSBPL11            | 5.98 | 6.59 | 5.41 |
| PGRMC1             | 5.98 | 6.57 | 5.30 |
| BCCIP              | 5.98 | 6.56 | 5.34 |
| LIMD1              | 5.97 | 6.32 | 5.66 |
| OGFR-AS1           | 5.97 | 6.38 | 5.54 |
| CARHSP1            | 5.97 | 6.50 | 5.63 |
| ACOT9              | 5.97 | 6.61 | 5.32 |
| HNRNPH1            | 5.97 | 6.15 | 5.71 |
| RECK               | 5.97 | 6.27 | 5.64 |
| SPI1               | 5.97 | 6.32 | 5.52 |
| IGLV3-1            | 5.97 | 6.62 | 5.56 |
| WDR27              | 5.97 | 6.25 | 5.60 |
| ATG14              | 5.97 | 6.24 | 5.70 |
| TOMM22             | 5.97 | 6.56 | 5.52 |
| HNRNPF             | 5.97 | 6.28 | 5.62 |
| DDX41              | 5.97 | 6.28 | 5.51 |
| HM13               | 5.97 | 6.32 | 5.53 |
| UNK                | 5.97 | 6.39 | 5.35 |
| LHFPL2             | 5.97 | 6.48 | 5.15 |
| ADSL               | 5.97 | 6.24 | 5.55 |
| ATAD5              | 5.97 | 6.31 | 5.52 |
| TARS               | 5.97 | 6.83 | 5.29 |
| SCRG1              | 5.97 | 6.41 | 5.29 |
| FAM175B            | 5.97 | 6.40 | 5.16 |
| OTTHUMG00000156011 | 5.97 | 7.42 | 4.73 |
| SLC2A10            | 5.97 | 6.37 | 5.41 |
| OTTHUMG00000016049 | 5.97 | 6.80 | 5.21 |
| GLTSCR1L           | 5.97 | 6.35 | 5.74 |
| SLC1A4             | 5.97 | 6.43 | 5.30 |
| RNA5SP450          | 5.97 | 6.48 | 5.11 |
| GABPA              | 5.97 | 6.52 | 5.54 |
| GBAP1              | 5.97 | 6.42 | 5.54 |
| CYFIP1             | 5.97 | 6.53 | 5.36 |
| C5orf56            | 5.97 | 6.55 | 5.38 |
| GLRX               | 5.97 | 6.35 | 5.34 |
| FBRS               | 5.97 | 6.35 | 5.62 |
| CMKLR1             | 5.97 | 6.27 | 5.20 |
| NT5C3B             | 5.97 | 6.49 | 5.26 |

|                  |      |      |      |
|------------------|------|------|------|
| <i>TMEM175</i>   | 5.97 | 6.21 | 5.56 |
| <i>TRMT112</i>   | 5.97 | 6.45 | 5.55 |
| <i>MIR1301</i>   | 5.97 | 6.53 | 5.56 |
| <i>ZNF43</i>     | 5.97 | 6.51 | 5.38 |
| <i>NRP2</i>      | 5.97 | 6.99 | 5.16 |
| <i>KAT6B</i>     | 5.97 | 6.54 | 5.63 |
| <i>FAM149B1</i>  | 5.97 | 6.23 | 5.39 |
| <i>ATG4D</i>     | 5.97 | 6.15 | 5.75 |
| <i>IGLJ3</i>     | 5.97 | 7.75 | 5.25 |
| <i>FAM43A</i>    | 5.97 | 6.40 | 5.49 |
| <i>C20orf197</i> | 5.97 | 6.19 | 5.75 |
| <i>LRBA</i>      | 5.97 | 6.26 | 5.54 |
| <i>EIF4A3</i>    | 5.97 | 6.40 | 5.40 |
| <i>CIZ1</i>      | 5.97 | 6.33 | 5.41 |
| <i>EXOC3</i>     | 5.97 | 6.10 | 5.75 |
| <i>FBXW8</i>     | 5.97 | 6.30 | 5.49 |
| <i>GPR153</i>    | 5.97 | 6.26 | 5.45 |
| <i>MAPKAPK3</i>  | 5.97 | 6.23 | 5.67 |
| <i>TTLL4</i>     | 5.97 | 6.63 | 5.53 |
| <i>CD33</i>      | 5.97 | 6.32 | 5.42 |
| <i>MAP1A</i>     | 5.97 | 6.66 | 4.87 |
| <i>PPME1</i>     | 5.97 | 6.48 | 5.26 |
| <i>SUCLA2</i>    | 5.97 | 6.47 | 5.27 |
| <i>ATIC</i>      | 5.97 | 6.37 | 5.43 |
| <i>WWC2</i>      | 5.97 | 6.41 | 5.56 |
| <i>SPAST</i>     | 5.97 | 6.48 | 4.86 |
| <i>NKX3-1</i>    | 5.97 | 6.24 | 5.65 |
| <i>HDAC7</i>     | 5.97 | 6.24 | 5.72 |
| <i>MCCC2</i>     | 5.96 | 6.49 | 5.30 |
| <i>ATP8B2</i>    | 5.96 | 6.36 | 5.40 |
| <i>LOXL2</i>     | 5.96 | 7.14 | 5.10 |
| <i>PDGFA</i>     | 5.96 | 6.59 | 5.40 |
| <i>SEPT7</i>     | 5.96 | 6.29 | 5.52 |
| <i>GSTM2P1</i>   | 5.96 | 6.60 | 5.32 |
| <i>PRAP1</i>     | 5.96 | 6.47 | 5.53 |
| <i>N4BP2</i>     | 5.96 | 6.27 | 5.42 |
| <i>GGT5</i>      | 5.96 | 6.50 | 5.45 |
| <i>DEGS2</i>     | 5.96 | 6.42 | 5.35 |
| <i>DHX40</i>     | 5.96 | 6.43 | 5.24 |
| <i>SOX8</i>      | 5.96 | 6.58 | 5.50 |
| <i>LINC00852</i> | 5.96 | 6.26 | 5.50 |
| <i>PRKRIR</i>    | 5.96 | 6.37 | 5.62 |
| <i>UTP18</i>     | 5.96 | 6.50 | 5.42 |
| <i>HTT</i>       | 5.96 | 6.37 | 5.45 |
| <i>ERAP2</i>     | 5.96 | 6.62 | 5.18 |
| <i>NAPA</i>      | 5.96 | 6.23 | 5.63 |
| <i>ARAF</i>      | 5.96 | 6.31 | 5.70 |
| <i>FLJ43663</i>  | 5.96 | 6.41 | 5.23 |
| <i>SLC25A26</i>  | 5.96 | 6.27 | 5.60 |

|            |      |      |      |
|------------|------|------|------|
| RPAP2      | 5.96 | 6.42 | 5.42 |
| ZNF397     | 5.96 | 6.52 | 5.51 |
| BMPER      | 5.96 | 6.49 | 5.37 |
| ACTB       | 5.96 | 6.25 | 5.60 |
| SESN1      | 5.96 | 6.44 | 5.31 |
| NARG2      | 5.96 | 6.37 | 5.56 |
| ARMC8      | 5.96 | 6.38 | 5.63 |
| ZXDB       | 5.96 | 6.80 | 4.86 |
| MED1       | 5.96 | 6.32 | 5.52 |
| DUSP16     | 5.96 | 6.32 | 5.66 |
| NGFRAP1    | 5.96 | 6.21 | 5.78 |
| WDR31      | 5.96 | 6.43 | 5.34 |
| CAPN10     | 5.96 | 6.84 | 5.56 |
| RNU7-77P   | 5.96 | 6.59 | 5.45 |
| SNN        | 5.96 | 6.37 | 5.56 |
| SEMA3D     | 5.96 | 6.65 | 5.20 |
| MAGED4     | 5.96 | 6.50 | 5.60 |
| XPNPEP3    | 5.96 | 6.41 | 5.63 |
| PTPDC1     | 5.96 | 6.30 | 5.42 |
| NCR2       | 5.96 | 6.40 | 5.38 |
| RNPEP      | 5.96 | 6.14 | 5.74 |
| PTGFRN     | 5.96 | 6.88 | 5.33 |
| OSBPL2     | 5.96 | 6.30 | 5.49 |
| WDR59      | 5.96 | 6.43 | 5.54 |
| RNF135     | 5.96 | 6.70 | 5.35 |
| AKAP11-IT1 | 5.96 | 6.33 | 5.32 |
| BCL9       | 5.96 | 6.37 | 5.66 |
| ARL5B      | 5.96 | 6.31 | 5.50 |
| BBX        | 5.96 | 6.21 | 5.73 |
| TFCP2      | 5.96 | 6.48 | 5.31 |
| ZZZ3       | 5.96 | 6.36 | 5.20 |
| LOC653562  | 5.96 | 6.90 | 5.15 |
| DOCK4      | 5.96 | 6.25 | 5.56 |
| DDAH1      | 5.96 | 6.51 | 5.18 |
| SLC12A4    | 5.96 | 6.25 | 5.55 |
| PROM2      | 5.96 | 6.48 | 5.59 |
| WARS       | 5.96 | 6.24 | 5.69 |
| TSN        | 5.96 | 6.40 | 5.51 |
| TMEM66     | 5.96 | 6.30 | 5.63 |
| TMEM41A    | 5.96 | 6.23 | 5.39 |
| LRG1       | 5.95 | 6.12 | 5.71 |
| LCP1       | 5.95 | 6.82 | 5.54 |
| C19orf66   | 5.95 | 6.37 | 5.61 |
| ADAMTSL3   | 5.95 | 6.59 | 5.20 |
| PTPN4      | 5.95 | 6.30 | 5.66 |
| NDUFA6     | 5.95 | 6.49 | 5.35 |
| MATN2      | 5.95 | 6.61 | 5.27 |
| NHLRC2     | 5.95 | 6.26 | 5.44 |
| CCDC41     | 5.95 | 6.56 | 5.21 |

|           |      |      |      |
|-----------|------|------|------|
| BBS7      | 5.95 | 6.25 | 5.64 |
| RALY      | 5.95 | 6.29 | 5.25 |
| TMEM8B    | 5.95 | 6.22 | 5.80 |
| PREX1     | 5.95 | 6.52 | 5.33 |
| ZBTB4     | 5.95 | 6.38 | 5.56 |
| XPO7      | 5.95 | 6.51 | 5.31 |
| LYPLA2    | 5.95 | 6.44 | 5.61 |
| FAM201A   | 5.95 | 6.40 | 5.44 |
| C9orf114  | 5.95 | 6.40 | 5.41 |
| ARID5B    | 5.95 | 6.49 | 5.47 |
| PDLIM3    | 5.95 | 7.26 | 4.85 |
| MYLIP     | 5.95 | 6.59 | 5.31 |
| BCL2L12   | 5.95 | 6.31 | 5.68 |
| PPP1R12A  | 5.95 | 6.44 | 5.44 |
| LOC646329 | 5.95 | 6.50 | 5.42 |
| RNF144A   | 5.95 | 6.59 | 5.46 |
| EDEM3     | 5.95 | 6.43 | 5.41 |
| RAP1GDS1  | 5.95 | 6.44 | 5.58 |
| TBC1D3F   | 5.95 | 6.18 | 5.66 |
| RAB5B     | 5.95 | 6.21 | 5.56 |
| ETV6      | 5.95 | 6.46 | 5.44 |
| ERO1L     | 5.95 | 7.24 | 4.94 |
| FSCN1     | 5.95 | 6.67 | 5.33 |
| PDCD11    | 5.95 | 6.37 | 5.44 |
| CLPP      | 5.95 | 6.38 | 5.49 |
| INSIG2    | 5.95 | 6.45 | 5.28 |
| GIMAP4    | 5.95 | 6.78 | 5.01 |
| KIAA0141  | 5.95 | 6.24 | 5.57 |
| REXO1     | 5.95 | 6.33 | 5.66 |
| KIAA1731  | 5.95 | 6.25 | 5.58 |
| PRAMEF10  | 5.95 | 6.61 | 5.23 |
| ZNF93     | 5.95 | 6.30 | 5.62 |
| PLEKHA8P1 | 5.95 | 6.15 | 5.59 |
| PKI55     | 5.95 | 6.29 | 5.68 |
| MGC34800  | 5.95 | 6.86 | 5.50 |
| MIR631    | 5.95 | 6.48 | 5.41 |
| MROH6     | 5.95 | 6.12 | 5.63 |
| LDHA      | 5.95 | 6.72 | 5.20 |
| NPC1      | 5.95 | 7.35 | 5.05 |
| GNAS      | 5.95 | 6.14 | 5.76 |
| CNOT2     | 5.95 | 6.36 | 5.47 |
| RARRES3   | 5.95 | 6.71 | 5.49 |
| RORA      | 5.95 | 6.47 | 5.49 |
| KDSR      | 5.95 | 6.50 | 5.27 |
| LOC285638 | 5.95 | 6.48 | 4.74 |
| USP40     | 5.95 | 6.24 | 5.77 |
| IDS       | 5.95 | 6.65 | 5.04 |
| TSPAN32   | 5.95 | 6.24 | 5.69 |
| CD70      | 5.95 | 6.34 | 5.39 |

|                    |      |      |      |
|--------------------|------|------|------|
| PHTF1              | 5.94 | 6.27 | 5.15 |
| MRPL13             | 5.94 | 6.85 | 4.85 |
| LTBR               | 5.94 | 6.22 | 5.43 |
| DOK2               | 5.94 | 6.30 | 5.47 |
| PPP2R5C            | 5.94 | 6.38 | 4.76 |
| CLN5               | 5.94 | 6.43 | 5.45 |
| CHSY3              | 5.94 | 6.65 | 5.23 |
| DICER1-AS1         | 5.94 | 6.25 | 5.52 |
| MIR412             | 5.94 | 6.52 | 5.51 |
| OR4N2              | 5.94 | 7.13 | 4.60 |
| MINK1              | 5.94 | 6.37 | 5.56 |
| ZNF574             | 5.94 | 6.39 | 5.54 |
| MAP3K12            | 5.94 | 6.29 | 5.60 |
| STAT6              | 5.94 | 6.17 | 5.73 |
| ZNF827             | 5.94 | 6.47 | 5.08 |
| NELFE              | 5.94 | 6.24 | 5.52 |
| RUNX2              | 5.94 | 6.56 | 5.09 |
| KIAA0196           | 5.94 | 6.52 | 5.13 |
| RNA5SP258          | 5.94 | 6.42 | 5.58 |
| IFI44              | 5.94 | 7.16 | 5.27 |
| DROSHA             | 5.94 | 6.32 | 5.58 |
| MYO15B             | 5.94 | 6.19 | 5.64 |
| PPP1CA             | 5.94 | 6.44 | 5.41 |
| COL4A3BP           | 5.94 | 6.56 | 5.00 |
| ATMIN              | 5.94 | 6.14 | 5.37 |
| SIAH2              | 5.94 | 6.31 | 5.31 |
| DHPS               | 5.94 | 6.38 | 5.51 |
| HIPK1              | 5.94 | 6.49 | 5.11 |
| FAM101B            | 5.94 | 6.51 | 5.42 |
| SYNRG              | 5.94 | 6.50 | 5.28 |
| RNA5SP427          | 5.94 | 6.51 | 5.42 |
| SLC29A3            | 5.94 | 6.59 | 5.20 |
| MIR2467            | 5.94 | 6.31 | 5.60 |
| KIAA0146           | 5.94 | 6.22 | 5.68 |
| KIAA0319L          | 5.94 | 6.20 | 5.61 |
| PANK2              | 5.94 | 6.32 | 5.46 |
| CUTA               | 5.94 | 6.31 | 5.44 |
| COQ4               | 5.94 | 6.30 | 5.43 |
| RNA5SP482          | 5.94 | 6.57 | 5.02 |
| OTTHUMG00000016583 | 5.94 | 6.41 | 5.44 |
| SNORA10            | 5.94 | 6.38 | 5.19 |
| AGPAT4             | 5.94 | 6.44 | 5.40 |
| SMIM20             | 5.94 | 6.30 | 5.62 |
| H2AFJ              | 5.94 | 6.16 | 5.37 |
| HACL1              | 5.94 | 6.16 | 5.73 |
| NEK4               | 5.94 | 6.24 | 5.36 |
| TNKS1BP1           | 5.94 | 6.05 | 5.62 |
| LOC100128644       | 5.94 | 6.25 | 5.56 |
| FAM224B            | 5.94 | 6.23 | 5.48 |

|           |      |      |      |
|-----------|------|------|------|
| KIAA0753  | 5.94 | 6.25 | 5.54 |
| BTF3      | 5.94 | 6.14 | 5.76 |
| HAMP      | 5.93 | 6.27 | 5.54 |
| TGFB111   | 5.93 | 6.50 | 5.44 |
| DIP2A     | 5.93 | 6.23 | 5.74 |
| CRTC1     | 5.93 | 6.33 | 5.56 |
| DLD       | 5.93 | 6.29 | 5.39 |
| MRE11A    | 5.93 | 6.40 | 5.19 |
| MLST8     | 5.93 | 6.14 | 5.68 |
| CRTC2     | 5.93 | 6.24 | 5.57 |
| CFLAR     | 5.93 | 6.23 | 5.48 |
| SNORD100  | 5.93 | 6.57 | 5.36 |
| CTC1      | 5.93 | 6.25 | 5.38 |
| FLRT2     | 5.93 | 6.56 | 5.39 |
| KSR1      | 5.93 | 6.13 | 5.59 |
| ZNF227    | 5.93 | 6.38 | 5.62 |
| CYP2D6    | 5.93 | 6.40 | 5.38 |
| GTPBP4    | 5.93 | 6.38 | 5.30 |
| FAM160B1  | 5.93 | 6.39 | 5.46 |
| PTS       | 5.93 | 6.36 | 5.31 |
| RPS4X     | 5.93 | 6.46 | 5.23 |
| ZNF880    | 5.93 | 6.30 | 5.56 |
| BAD       | 5.93 | 6.19 | 5.34 |
| LPP-AS2   | 5.93 | 6.18 | 5.69 |
| PF4       | 5.93 | 6.52 | 5.52 |
| LOC441956 | 5.93 | 6.72 | 5.26 |
| RNF145    | 5.93 | 6.36 | 5.47 |
| ZNF141    | 5.93 | 6.57 | 5.58 |
| SIPA1L3   | 5.93 | 6.37 | 5.61 |
| DHR SX    | 5.93 | 6.30 | 5.52 |
| ADD1      | 5.93 | 6.21 | 5.49 |
| PBDC1     | 5.93 | 6.48 | 5.09 |
| MIR637    | 5.93 | 6.60 | 5.51 |
| NIT1      | 5.93 | 6.25 | 5.71 |
| BBS9      | 5.93 | 6.45 | 5.40 |
| CACUL1    | 5.93 | 6.32 | 5.27 |
| MYO18A    | 5.93 | 6.09 | 5.74 |
| FUT10     | 5.93 | 6.22 | 5.32 |
| NOL8      | 5.93 | 6.27 | 5.53 |
| NLK       | 5.93 | 6.22 | 5.53 |
| NONO      | 5.93 | 6.54 | 5.27 |
| PRKCDBP   | 5.93 | 6.33 | 5.33 |
| LINC00539 | 5.93 | 6.80 | 5.13 |
| BAZ2A     | 5.93 | 6.38 | 5.49 |
| CPD       | 5.93 | 6.29 | 5.43 |
| MIR4742   | 5.93 | 6.44 | 4.98 |
| BIN1      | 5.93 | 6.26 | 5.32 |
| MIR4450   | 5.93 | 6.26 | 5.45 |
| PARM1     | 5.93 | 7.15 | 4.77 |



|                    |      |      |      |
|--------------------|------|------|------|
| PPID               | 5.93 | 6.62 | 5.34 |
| GTPBP2             | 5.93 | 6.14 | 5.57 |
| EAF1               | 5.93 | 6.20 | 5.47 |
| METTL17            | 5.93 | 6.25 | 5.60 |
| KLHL28             | 5.93 | 6.16 | 5.60 |
| GRAMD3             | 5.93 | 6.27 | 5.49 |
| C17orf82           | 5.93 | 6.61 | 5.49 |
| MYO9B              | 5.93 | 6.24 | 5.35 |
| CCDC82             | 5.93 | 6.54 | 5.03 |
| SOX18              | 5.93 | 6.60 | 5.24 |
| PAN2               | 5.93 | 6.37 | 5.62 |
| LINC00641          | 5.92 | 6.51 | 5.47 |
| OTTHUMG00000165259 | 5.92 | 6.32 | 5.50 |
| UBQLN2             | 5.92 | 6.31 | 5.44 |
| DOT1L              | 5.92 | 6.29 | 5.57 |
| ZC3HAV1L           | 5.92 | 6.45 | 5.44 |
| SZRD1              | 5.92 | 6.36 | 5.62 |
| USP21              | 5.92 | 6.12 | 5.60 |
| FGFR1              | 5.92 | 6.33 | 5.30 |
| FAF2               | 5.92 | 6.39 | 5.54 |
| FOXH1              | 5.92 | 6.25 | 5.64 |
| GPR34              | 5.92 | 6.79 | 4.52 |
| HIBCH              | 5.92 | 6.36 | 5.28 |
| POLD2              | 5.92 | 6.45 | 5.60 |
| MLKL               | 5.92 | 6.37 | 5.10 |
| SAP25              | 5.92 | 6.48 | 5.31 |
| SNX29P2            | 5.92 | 6.32 | 5.54 |
| MYOZ3              | 5.92 | 6.22 | 5.54 |
| IRX3               | 5.92 | 6.24 | 5.63 |
| LARP1B             | 5.92 | 6.26 | 5.41 |
| NUDT19             | 5.92 | 6.38 | 5.27 |
| PDHX               | 5.92 | 6.09 | 5.18 |
| APMAP              | 5.92 | 6.19 | 5.57 |
| UPF2               | 5.92 | 6.25 | 5.24 |
| OTTHUMG00000171477 | 5.92 | 6.80 | 4.98 |
| GPN1               | 5.92 | 6.38 | 5.47 |
| KIAA2018           | 5.92 | 6.16 | 5.29 |
| OAZ2               | 5.92 | 6.24 | 5.44 |
| SPTLC2             | 5.92 | 6.49 | 5.29 |
| DNAJB14            | 5.92 | 6.34 | 5.53 |
| SPOP               | 5.92 | 6.36 | 5.48 |
| PEX1               | 5.92 | 6.43 | 5.60 |
| ATP6V0D1           | 5.92 | 6.40 | 5.25 |
| ABCE1              | 5.92 | 6.52 | 5.24 |
| BTBD1              | 5.92 | 6.45 | 5.29 |
| EIF5               | 5.92 | 6.35 | 5.21 |
| CEP290             | 5.92 | 6.34 | 5.30 |
| LOC400558          | 5.92 | 6.44 | 5.48 |
| BLOC1S3            | 5.92 | 6.23 | 5.59 |

|                           |      |      |      |
|---------------------------|------|------|------|
| <i>BECN1</i>              | 5.92 | 6.36 | 5.28 |
| <i>DIS3L2</i>             | 5.92 | 6.20 | 5.75 |
| <i>OSBPL1A</i>            | 5.92 | 6.41 | 5.17 |
| <i>ASL</i>                | 5.92 | 6.22 | 5.80 |
| <i>FBXO28</i>             | 5.92 | 6.50 | 5.21 |
| <i>BRAP</i>               | 5.92 | 6.21 | 5.50 |
| <i>GPATCH11</i>           | 5.92 | 6.32 | 5.54 |
| <i>LOC100506276</i>       | 5.92 | 6.16 | 5.61 |
| <i>CRAT</i>               | 5.92 | 6.25 | 5.48 |
| <i>GLDN</i>               | 5.92 | 6.62 | 5.08 |
| <i>DLEU2</i>              | 5.92 | 6.65 | 4.99 |
| <i>NAA30</i>              | 5.92 | 6.17 | 5.54 |
| <i>ABHD10</i>             | 5.92 | 6.21 | 5.55 |
| <i>C21orf15</i>           | 5.92 | 6.31 | 5.47 |
| <i>ZBTB25</i>             | 5.92 | 6.37 | 5.55 |
| <i>ABCF3</i>              | 5.91 | 6.18 | 5.42 |
| <i>KIAA1462</i>           | 5.91 | 6.57 | 4.88 |
| <i>OR2T6</i>              | 5.91 | 6.41 | 5.67 |
| <i>AAK1</i>               | 5.91 | 6.33 | 5.33 |
| <i>BTBD6</i>              | 5.91 | 6.29 | 5.58 |
| <i>TIMM10B</i>            | 5.91 | 6.20 | 5.46 |
| <i>CCDC125</i>            | 5.91 | 6.17 | 5.61 |
| <i>METTL2B</i>            | 5.91 | 6.51 | 5.07 |
| <i>C9orf78</i>            | 5.91 | 6.26 | 5.38 |
| <i>OTTHUMG00000171929</i> | 5.91 | 6.35 | 5.37 |
| <i>RGPD3</i>              | 5.91 | 6.57 | 5.24 |
| <i>CIAO1</i>              | 5.91 | 6.24 | 5.58 |
| <i>FBXO38</i>             | 5.91 | 6.28 | 5.60 |
| <i>USF2</i>               | 5.91 | 6.15 | 5.45 |
| <i>RPF1</i>               | 5.91 | 6.35 | 5.52 |
| <i>RNF111</i>             | 5.91 | 6.24 | 5.47 |
| <i>PHF20L1</i>            | 5.91 | 6.36 | 5.43 |
| <i>NOLC1</i>              | 5.91 | 6.37 | 5.47 |
| <i>PLCXD1</i>             | 5.91 | 6.58 | 5.14 |
| <i>PPAP2B</i>             | 5.91 | 6.47 | 5.27 |
| <i>SNHG10</i>             | 5.91 | 6.23 | 5.30 |
| <i>UBE2G2</i>             | 5.91 | 6.32 | 5.48 |
| <i>LOC642852</i>          | 5.91 | 6.48 | 5.61 |
| <i>YWHAE</i>              | 5.91 | 6.33 | 5.18 |
| <i>EIF3I</i>              | 5.91 | 6.30 | 5.09 |
| <i>GAPVD1</i>             | 5.91 | 6.29 | 5.58 |
| <i>IGH</i>                | 5.91 | 7.10 | 5.43 |
| <i>TBP</i>                | 5.91 | 6.38 | 5.61 |
| <i>RTFDC1</i>             | 5.91 | 6.24 | 5.65 |
| <i>DNAJC1</i>             | 5.91 | 6.63 | 5.21 |
| <i>OR8B2</i>              | 5.91 | 7.04 | 5.18 |
| <i>TUBGCP5</i>            | 5.91 | 6.25 | 5.43 |
| <i>C5orf24</i>            | 5.91 | 6.37 | 5.28 |
| <i>FAM20A</i>             | 5.91 | 6.23 | 5.54 |

|                    |      |      |      |
|--------------------|------|------|------|
| ANGEL2             | 5.91 | 6.21 | 5.45 |
| FAM180B            | 5.91 | 6.57 | 5.41 |
| ATP11C             | 5.91 | 6.36 | 5.36 |
| SLC25A24           | 5.91 | 6.41 | 5.26 |
| CCL3L3             | 5.91 | 6.12 | 5.71 |
| OTTHUMG00000171841 | 5.91 | 6.35 | 5.54 |
| ASB16              | 5.91 | 6.18 | 5.57 |
| SP100              | 5.91 | 6.31 | 5.49 |
| SIX2               | 5.91 | 6.22 | 5.61 |
| HIST2H4B           | 5.91 | 6.44 | 5.43 |
| RQCD1              | 5.91 | 6.31 | 5.38 |
| SLC39A8            | 5.91 | 6.32 | 5.54 |
| RBPM5              | 5.91 | 6.68 | 5.50 |
| PTGER4P2-CDK2AP2P2 | 5.91 | 6.42 | 5.53 |
| PRKY               | 5.91 | 7.01 | 4.26 |
| SLC37A3            | 5.91 | 6.17 | 5.59 |
| TRIM74             | 5.91 | 6.50 | 5.45 |
| HBP1               | 5.91 | 6.31 | 5.23 |
| LPIN3              | 5.90 | 6.33 | 5.64 |
| OTTHUMG00000171546 | 5.90 | 6.63 | 5.31 |
| ZBTB1              | 5.90 | 6.16 | 5.56 |
| MRPL50             | 5.90 | 6.30 | 5.47 |
| ACPL2              | 5.90 | 6.32 | 5.16 |
| GJA4               | 5.90 | 6.39 | 5.42 |
| BACE1-AS           | 5.90 | 6.46 | 5.22 |
| PFKP               | 5.90 | 6.61 | 4.54 |
| MSI2               | 5.90 | 6.27 | 5.33 |
| MERTK              | 5.90 | 7.16 | 5.23 |
| PSMC6              | 5.90 | 6.46 | 5.44 |
| PCYT1A             | 5.90 | 6.13 | 5.48 |
| LAMTOR1            | 5.90 | 6.37 | 5.61 |
| MRPS5              | 5.90 | 6.15 | 5.56 |
| IFT46              | 5.90 | 6.20 | 5.59 |
| ZNF773             | 5.90 | 6.13 | 5.67 |
| ATXN7              | 5.90 | 6.18 | 5.76 |
| GRPEL1             | 5.90 | 6.13 | 5.48 |
| ODF2L              | 5.90 | 6.40 | 5.22 |
| MTHFD2             | 5.90 | 6.28 | 5.49 |
| HSFX1              | 5.90 | 6.36 | 5.63 |
| PELI1              | 5.90 | 6.25 | 5.30 |
| JUP                | 5.90 | 6.11 | 5.53 |
| CCDC90B            | 5.90 | 6.17 | 5.40 |
| ZFP62              | 5.90 | 6.19 | 5.33 |
| STYXL1             | 5.90 | 6.28 | 5.58 |
| SNX4               | 5.90 | 6.31 | 5.20 |
| SENP1              | 5.90 | 6.23 | 5.30 |
| GK-IT1             | 5.90 | 6.32 | 5.48 |
| SH3BGRL2           | 5.90 | 6.36 | 5.29 |
| ZBTB10             | 5.90 | 6.51 | 5.34 |

|                    |      |      |      |
|--------------------|------|------|------|
| RAB2A              | 5.90 | 6.35 | 5.32 |
| ZDHHC24            | 5.90 | 6.17 | 5.72 |
| ANGPTL4            | 5.90 | 6.87 | 5.09 |
| OTTHUMG00000160985 | 5.90 | 6.20 | 5.67 |
| MIR577             | 5.90 | 6.54 | 5.39 |
| MMS19              | 5.90 | 6.29 | 5.56 |
| MIR4476            | 5.90 | 6.47 | 5.44 |
| YIPF6              | 5.90 | 6.22 | 5.47 |
| BCL3               | 5.90 | 6.10 | 5.54 |
| FBXO2              | 5.90 | 6.43 | 5.52 |
| RPS27L             | 5.90 | 6.51 | 5.48 |
| ATL2               | 5.90 | 6.10 | 5.25 |
| OPCML              | 5.90 | 6.58 | 5.53 |
| PRKCSH             | 5.90 | 6.13 | 5.23 |
| ERV3-1             | 5.90 | 6.18 | 5.61 |
| SMARCA4            | 5.90 | 6.30 | 5.60 |
| C3orf17            | 5.90 | 6.39 | 5.23 |
| TMEM127            | 5.90 | 6.27 | 5.34 |
| VPRBP              | 5.90 | 6.23 | 5.56 |
| SCYL3              | 5.90 | 6.15 | 5.75 |
| JTB                | 5.90 | 6.45 | 5.25 |
| ANKRD39            | 5.90 | 6.27 | 5.52 |
| PREB               | 5.90 | 6.05 | 5.62 |
| VAMP2              | 5.89 | 6.13 | 5.67 |
| MIR378H            | 5.89 | 6.58 | 5.06 |
| FADS2              | 5.89 | 6.32 | 5.44 |
| WDR41              | 5.89 | 6.71 | 5.44 |
| LOC100128281       | 5.89 | 6.20 | 5.63 |
| TTC34              | 5.89 | 6.22 | 5.61 |
| C21orf2            | 5.89 | 6.06 | 5.48 |
| GNG2               | 5.89 | 6.56 | 4.92 |
| MIR4451            | 5.89 | 6.68 | 4.78 |
| SEPT5-GP1BB        | 5.89 | 6.03 | 5.59 |
| LOC100505806       | 5.89 | 6.17 | 5.51 |
| BDKRB2             | 5.89 | 6.30 | 5.66 |
| MIR3125            | 5.89 | 6.30 | 5.67 |
| ARHGEF15           | 5.89 | 6.37 | 5.16 |
| NAA40              | 5.89 | 6.21 | 5.57 |
| CUX1               | 5.89 | 6.43 | 5.21 |
| CD81               | 5.89 | 6.14 | 5.65 |
| SLC25A32           | 5.89 | 6.37 | 5.45 |
| LINC00693          | 5.89 | 6.48 | 5.36 |
| GTF3C6             | 5.89 | 6.51 | 5.23 |
| QSOX1              | 5.89 | 6.22 | 5.57 |
| KCNK7              | 5.89 | 6.10 | 5.66 |
| SYNPO              | 5.89 | 6.42 | 5.37 |
| SNX30              | 5.89 | 6.27 | 5.29 |
| DAAM2              | 5.89 | 6.29 | 5.48 |
| ARHGEF7            | 5.89 | 6.15 | 5.74 |

|                    |      |      |      |
|--------------------|------|------|------|
| EDN3               | 5.89 | 6.43 | 5.59 |
| PPM1M              | 5.89 | 6.24 | 5.59 |
| DCAF10             | 5.89 | 6.32 | 5.37 |
| CDC25B             | 5.89 | 6.12 | 5.63 |
| FAM178A            | 5.89 | 6.30 | 5.15 |
| METTL22            | 5.89 | 6.14 | 5.52 |
| ACD                | 5.89 | 6.32 | 5.64 |
| PGA4               | 5.89 | 6.23 | 5.58 |
| RAPGEF2            | 5.89 | 6.24 | 5.51 |
| SPTY2D1-AS1        | 5.89 | 6.20 | 5.61 |
| ZFX                | 5.89 | 6.37 | 5.36 |
| LINC00853          | 5.89 | 6.23 | 5.52 |
| CUL2               | 5.89 | 6.29 | 5.55 |
| OTTHUMG00000171084 | 5.89 | 6.56 | 5.63 |
| RAMP3              | 5.89 | 6.58 | 5.25 |
| RNA5SP69           | 5.89 | 6.54 | 5.41 |
| TCEAL7             | 5.89 | 6.53 | 5.05 |
| PMM2               | 5.89 | 6.42 | 5.31 |
| SLC39A13           | 5.89 | 6.16 | 5.69 |
| ECRP               | 5.89 | 6.34 | 5.29 |
| RHOD               | 5.89 | 6.19 | 5.70 |
| GTF3C4             | 5.89 | 6.30 | 5.31 |
| SFMBT2             | 5.89 | 6.20 | 5.42 |
| UCP2               | 5.89 | 6.80 | 5.26 |
| SMARCD1            | 5.89 | 6.26 | 5.55 |
| OTTHUMG00000024203 | 5.89 | 6.14 | 5.56 |
| TBC1D3             | 5.89 | 6.42 | 5.53 |
| BTRC               | 5.89 | 6.18 | 5.34 |
| RIN1               | 5.89 | 6.19 | 5.59 |
| C2orf68            | 5.89 | 6.21 | 5.67 |
| TTY15              | 5.89 | 7.24 | 3.31 |
| RPA1               | 5.89 | 6.17 | 5.53 |
| GOLPH3L            | 5.89 | 6.40 | 5.42 |
| TOPBP1             | 5.89 | 6.51 | 5.35 |
| PNPT1              | 5.89 | 6.15 | 5.32 |
| C12orf44           | 5.89 | 6.07 | 5.67 |
| OTTHUMG00000159124 | 5.89 | 6.12 | 5.36 |
| ZFAND2B            | 5.89 | 6.18 | 5.72 |
| GNRHR2             | 5.88 | 6.19 | 5.61 |
| LTBP4              | 5.88 | 6.27 | 5.59 |
| FOCAD              | 5.88 | 6.26 | 5.45 |
| SERTAD2            | 5.88 | 6.63 | 4.96 |
| ZNF160             | 5.88 | 6.28 | 5.40 |
| GFM2               | 5.88 | 6.42 | 4.97 |
| TOR1AIP2           | 5.88 | 6.32 | 5.29 |
| OXER1              | 5.88 | 6.37 | 5.33 |
| ACTR1A             | 5.88 | 6.43 | 5.28 |
| RNF126             | 5.88 | 6.22 | 5.45 |
| MIR26B             | 5.88 | 6.20 | 5.57 |

|                    |      |      |      |
|--------------------|------|------|------|
| SPOPL              | 5.88 | 6.33 | 5.41 |
| CDKL5              | 5.88 | 6.53 | 4.98 |
| SWI5               | 5.88 | 6.12 | 5.57 |
| ANKRA2             | 5.88 | 6.15 | 5.40 |
| CYB5R1             | 5.88 | 6.23 | 5.58 |
| LOC100128340       | 5.88 | 6.53 | 5.27 |
| MYLK-AS1           | 5.88 | 6.18 | 5.68 |
| LARP4              | 5.88 | 6.20 | 5.27 |
| ADH5               | 5.88 | 6.16 | 5.60 |
| MFSD5              | 5.88 | 6.25 | 5.12 |
| REPS1              | 5.88 | 6.20 | 5.35 |
| MIR4292            | 5.88 | 6.37 | 5.58 |
| PSMD11             | 5.88 | 6.26 | 5.16 |
| SLC35A5            | 5.88 | 6.82 | 5.28 |
| PCAT6              | 5.88 | 6.37 | 5.41 |
| ENTPD7             | 5.88 | 6.47 | 5.46 |
| SRP19              | 5.88 | 6.35 | 5.46 |
| MORF4L1            | 5.88 | 6.10 | 5.52 |
| ARMC9              | 5.88 | 6.69 | 5.11 |
| SOCS7              | 5.88 | 6.40 | 5.43 |
| HSPBAP1            | 5.88 | 6.24 | 5.06 |
| SERPINE2           | 5.88 | 7.38 | 4.61 |
| RPS6KC1            | 5.88 | 6.29 | 5.35 |
| ING4               | 5.88 | 6.39 | 5.40 |
| TAF8               | 5.88 | 6.22 | 5.64 |
| TRMT10B            | 5.88 | 6.28 | 5.50 |
| OTTHUMG00000165033 | 5.88 | 6.38 | 5.36 |
| LPCAT1             | 5.88 | 6.41 | 5.46 |
| GMDS               | 5.88 | 6.47 | 5.43 |
| MOB1B              | 5.88 | 6.36 | 5.08 |
| TMEM206            | 5.88 | 6.14 | 5.57 |
| DNTTIP1            | 5.88 | 6.22 | 5.63 |
| MFSD8              | 5.88 | 6.35 | 5.33 |
| SPRYD7             | 5.88 | 6.37 | 5.47 |
| OTTHUMG00000168766 | 5.88 | 6.24 | 5.59 |
| MLLT6              | 5.88 | 6.14 | 5.47 |
| ALAS1              | 5.88 | 6.21 | 5.54 |
| ST6GALNAC6         | 5.88 | 6.27 | 5.52 |
| SGPL1              | 5.88 | 6.60 | 5.05 |
| SPATA6             | 5.87 | 6.17 | 5.24 |
| PTPRA              | 5.87 | 6.20 | 5.47 |
| PITRM1-AS1         | 5.87 | 6.17 | 5.52 |
| DRAM2              | 5.87 | 6.49 | 5.26 |
| MPLKIP             | 5.87 | 6.18 | 5.20 |
| PLBD1              | 5.87 | 6.27 | 5.39 |
| EIF2AK3            | 5.87 | 6.10 | 5.53 |
| PLK1S1             | 5.87 | 6.36 | 5.37 |
| ACTA2              | 5.87 | 7.31 | 5.15 |
| VAX2               | 5.87 | 6.15 | 5.67 |

|                    |      |      |      |
|--------------------|------|------|------|
| UCHL3              | 5.87 | 6.50 | 5.21 |
| RARA               | 5.87 | 6.21 | 5.71 |
| KDM5A              | 5.87 | 6.18 | 5.22 |
| STAG1              | 5.87 | 6.44 | 5.06 |
| CLIP2              | 5.87 | 6.24 | 5.53 |
| OTTHUMG00000166655 | 5.87 | 6.18 | 5.64 |
| NISCH              | 5.87 | 6.28 | 5.48 |
| LOC100996385       | 5.87 | 6.61 | 5.50 |
| AMMECR1L           | 5.87 | 6.37 | 5.35 |
| AP4B1              | 5.87 | 6.31 | 5.43 |
| GRIN2D             | 5.87 | 6.47 | 5.16 |
| RPS9               | 5.87 | 6.16 | 5.53 |
| PTCRA              | 5.87 | 6.10 | 5.58 |
| WDR35              | 5.87 | 6.30 | 5.20 |
| PRKD3              | 5.87 | 6.48 | 4.96 |
| PPP1R21            | 5.87 | 6.18 | 5.62 |
| MGC21881           | 5.87 | 6.41 | 5.14 |
| PPP1R15B           | 5.87 | 6.36 | 5.36 |
| KANSL3             | 5.87 | 6.08 | 5.50 |
| LOC100652869       | 5.87 | 6.12 | 5.63 |
| PTOV1-AS1          | 5.87 | 6.26 | 5.31 |
| TLK1               | 5.87 | 6.19 | 5.45 |
| FBXO30             | 5.87 | 6.57 | 5.04 |
| OIP5-AS1           | 5.87 | 6.65 | 5.04 |
| RTN4               | 5.87 | 6.29 | 5.36 |
| FAM219A            | 5.87 | 6.29 | 5.61 |
| TAGLN2             | 5.87 | 7.04 | 4.54 |
| KANSL2             | 5.87 | 6.16 | 5.69 |
| HIST1H2BB          | 5.87 | 6.38 | 5.57 |
| IGKV3-15           | 5.87 | 6.58 | 5.32 |
| LINC00478          | 5.87 | 6.30 | 5.28 |
| TOLLIP-AS1         | 5.87 | 6.22 | 5.58 |
| OTTHUMG00000149070 | 5.87 | 6.40 | 5.50 |
| PARP14             | 5.87 | 6.57 | 4.89 |
| TRIO               | 5.87 | 6.62 | 5.21 |
| RNU6ATAC           | 5.87 | 6.15 | 5.58 |
| HOXD10             | 5.87 | 6.87 | 5.31 |
| UBAC2              | 5.87 | 6.16 | 5.43 |
| DNAJC4             | 5.87 | 6.27 | 5.53 |
| FAR1-IT1           | 5.87 | 7.02 | 5.09 |
| FGD1               | 5.87 | 6.10 | 5.71 |
| WBP4               | 5.87 | 6.49 | 5.12 |
| GALK2              | 5.87 | 6.19 | 5.47 |
| BOP1               | 5.87 | 6.23 | 5.37 |
| PTPN22             | 5.87 | 6.62 | 5.15 |
| ZFPM1              | 5.87 | 6.22 | 5.69 |
| FBXO22             | 5.87 | 6.27 | 5.23 |
| BICD1              | 5.87 | 6.77 | 5.19 |
| SLC22A17           | 5.87 | 6.32 | 5.47 |

|                           |      |      |      |
|---------------------------|------|------|------|
| <i>IREB2</i>              | 5.87 | 6.45 | 5.11 |
| <i>IFI27</i>              | 5.87 | 6.61 | 5.28 |
| <i>CTDSPL</i>             | 5.87 | 6.24 | 5.49 |
| <i>ERCC6L2</i>            | 5.87 | 6.20 | 5.16 |
| <i>FGF7</i>               | 5.87 | 7.22 | 4.67 |
| <i>CAB39</i>              | 5.87 | 6.17 | 5.33 |
| <i>DLX6</i>               | 5.87 | 6.26 | 5.58 |
| <i>SLC30A6</i>            | 5.87 | 6.22 | 5.48 |
| <i>SLC25A13</i>           | 5.86 | 6.35 | 5.39 |
| <i>PLCE1</i>              | 5.86 | 6.19 | 5.52 |
| <i>KIAA1715</i>           | 5.86 | 6.50 | 5.07 |
| <i>ITPKB</i>              | 5.86 | 6.35 | 5.50 |
| <i>ZNF24</i>              | 5.86 | 6.20 | 5.29 |
| <i>ONECUT2</i>            | 5.86 | 6.04 | 5.62 |
| <i>RIMBP3</i>             | 5.86 | 6.11 | 5.58 |
| <i>EML3</i>               | 5.86 | 6.10 | 5.51 |
| <i>LINC00508</i>          | 5.86 | 6.55 | 5.31 |
| <i>PSMD6</i>              | 5.86 | 6.28 | 5.29 |
| <i>BCL7B</i>              | 5.86 | 6.20 | 5.62 |
| <i>RICTOR</i>             | 5.86 | 6.38 | 4.99 |
| <i>MRPL55</i>             | 5.86 | 6.09 | 5.71 |
| <i>NAA10</i>              | 5.86 | 6.15 | 5.66 |
| <i>C9orf9</i>             | 5.86 | 6.06 | 5.48 |
| <i>EGFL8</i>              | 5.86 | 6.06 | 5.73 |
| <i>PXK</i>                | 5.86 | 6.46 | 4.95 |
| <i>KAT6A</i>              | 5.86 | 6.26 | 5.54 |
| <i>TMEM30B</i>            | 5.86 | 6.39 | 5.32 |
| <i>CARF</i>               | 5.86 | 6.48 | 5.28 |
| <i>NUMBL</i>              | 5.86 | 6.05 | 5.63 |
| <i>SLC25A12</i>           | 5.86 | 6.17 | 5.38 |
| <i>OTUD6B</i>             | 5.86 | 6.23 | 5.30 |
| <i>SCFD2</i>              | 5.86 | 6.20 | 5.40 |
| <i>LOC100130093</i>       | 5.86 | 6.26 | 5.30 |
| <i>UBAC2-IT1</i>          | 5.86 | 6.41 | 5.43 |
| <i>CSF1</i>               | 5.86 | 6.29 | 5.45 |
| <i>SOAT1</i>              | 5.86 | 6.20 | 5.44 |
| <i>FAM65A</i>             | 5.86 | 6.12 | 5.54 |
| <i>FAM126A</i>            | 5.86 | 6.81 | 4.86 |
| <i>PTPLAD2</i>            | 5.86 | 6.42 | 5.04 |
| <i>TMEM187</i>            | 5.86 | 6.14 | 5.59 |
| <i>AAAS</i>               | 5.86 | 6.20 | 5.26 |
| <i>FIS1</i>               | 5.86 | 6.36 | 5.34 |
| <i>LDLRAD3</i>            | 5.86 | 6.22 | 5.21 |
| <i>C11orf39</i>           | 5.86 | 6.25 | 5.36 |
| <i>FPR1</i>               | 5.86 | 7.04 | 5.04 |
| <i>OTTHUMG00000156753</i> | 5.86 | 6.25 | 5.58 |
| <i>RNA5SP383</i>          | 5.86 | 6.32 | 5.31 |
| <i>DNAJC8</i>             | 5.86 | 6.12 | 5.45 |
| <i>CLDN19</i>             | 5.86 | 6.03 | 5.52 |



|                    |      |      |      |
|--------------------|------|------|------|
| LOC100505573       | 5.86 | 6.24 | 5.39 |
| C16orf90           | 5.86 | 6.24 | 5.44 |
| ELF2               | 5.86 | 6.33 | 5.46 |
| TTBK2              | 5.86 | 6.31 | 5.44 |
| WRNIP1             | 5.86 | 6.36 | 5.29 |
| ANKRD11            | 5.86 | 6.26 | 5.43 |
| HSD17B8            | 5.86 | 6.14 | 5.53 |
| DVL1               | 5.86 | 6.13 | 5.52 |
| DYX1C1-CCPG1       | 5.86 | 6.32 | 4.55 |
| QRFP               | 5.86 | 6.24 | 5.62 |
| PAK1               | 5.86 | 6.22 | 5.48 |
| TRNT1              | 5.86 | 6.09 | 5.59 |
| TMEM196            | 5.86 | 6.74 | 4.68 |
| LINC00482          | 5.86 | 6.34 | 5.31 |
| SEPT6              | 5.86 | 6.25 | 5.52 |
| OTTHUMG00000019916 | 5.86 | 6.21 | 5.45 |
| CDKN2D             | 5.86 | 6.05 | 5.51 |
| C21orf33           | 5.86 | 6.07 | 5.41 |
| SIPA1L2            | 5.86 | 6.60 | 5.06 |
| CLEC7A             | 5.86 | 7.46 | 5.13 |
| MTMR14             | 5.86 | 6.19 | 5.58 |
| TMEM198B           | 5.86 | 6.16 | 5.37 |
| HSP90AB3P          | 5.86 | 6.38 | 5.23 |
| RNF8               | 5.86 | 6.21 | 5.54 |
| EGFR               | 5.86 | 6.43 | 5.51 |
| HIAT1              | 5.85 | 6.20 | 5.19 |
| U2AF1L4            | 5.85 | 6.23 | 5.42 |
| SACS               | 5.85 | 6.74 | 4.78 |
| STAU2              | 5.85 | 6.21 | 5.20 |
| MIR1205            | 5.85 | 6.21 | 5.09 |
| COL9A3             | 5.85 | 6.23 | 5.22 |
| PRPF6              | 5.85 | 6.04 | 5.36 |
| EPB41L1            | 5.85 | 6.24 | 5.29 |
| ETHE1              | 5.85 | 6.38 | 5.31 |
| NFATC3             | 5.85 | 6.09 | 5.50 |
| PIEZO1             | 5.85 | 6.34 | 5.39 |
| C4A                | 5.85 | 6.25 | 5.58 |
| NFYC               | 5.85 | 6.05 | 5.59 |
| HIST1H4J           | 5.85 | 6.42 | 5.46 |
| YIPF4              | 5.85 | 6.33 | 5.26 |
| PODXL              | 5.85 | 6.74 | 5.11 |
| LTN1               | 5.85 | 6.27 | 5.33 |
| SYNGR2             | 5.85 | 6.75 | 5.27 |
| SLC4A1AP           | 5.85 | 6.29 | 5.39 |
| ZNF830             | 5.85 | 6.20 | 5.25 |
| UBE3B              | 5.85 | 6.10 | 5.67 |
| C12orf49           | 5.85 | 6.21 | 5.22 |
| C11orf31           | 5.85 | 6.38 | 5.26 |
| FCGRT              | 5.85 | 6.12 | 5.67 |

|                    |      |      |      |
|--------------------|------|------|------|
| ABCD3              | 5.85 | 6.47 | 5.20 |
| OTTHUMG00000151134 | 5.85 | 6.46 | 5.26 |
| NECAP2             | 5.85 | 6.23 | 5.19 |
| OR1E2              | 5.85 | 6.37 | 5.22 |
| HSPA6              | 5.85 | 7.17 | 4.87 |
| NCOA5              | 5.85 | 6.46 | 5.42 |
| PER1               | 5.85 | 6.17 | 5.50 |
| CNFN               | 5.85 | 6.43 | 5.44 |
| MIR4316            | 5.85 | 6.16 | 5.45 |
| CDC42EP5           | 5.85 | 6.24 | 5.48 |
| TACC2              | 5.85 | 6.18 | 5.09 |
| LGALS9B            | 5.85 | 6.19 | 5.52 |
| LLPH               | 5.85 | 6.15 | 5.48 |
| TNFSF12-TNFSF13    | 5.85 | 6.10 | 5.55 |
| CDK5RAP2           | 5.85 | 6.09 | 5.29 |
| PREX2              | 5.85 | 6.49 | 4.76 |
| SPOCK1             | 5.85 | 6.53 | 5.46 |
| SHQ1               | 5.85 | 6.29 | 5.42 |
| OGFOD3             | 5.85 | 6.10 | 5.51 |
| NUP160             | 5.85 | 6.30 | 5.21 |
| CWF19L2            | 5.85 | 6.24 | 5.18 |
| CTTNBP2            | 5.85 | 7.07 | 4.98 |
| MIR3622A           | 5.85 | 6.24 | 5.32 |
| ZNF121             | 5.85 | 6.36 | 5.25 |
| EIF4G1             | 5.85 | 6.23 | 5.43 |
| MFSD7              | 5.85 | 6.08 | 5.42 |
| HIST1H2BD          | 5.85 | 6.44 | 5.17 |
| ZHX3               | 5.85 | 6.08 | 5.46 |
| UBN2               | 5.85 | 6.12 | 5.43 |
| SDC1               | 5.85 | 6.55 | 5.44 |
| H2AFY              | 5.85 | 6.42 | 5.20 |
| GORASP2            | 5.85 | 6.30 | 5.31 |
| HERC2P4            | 5.85 | 6.33 | 5.25 |
| SCFD1              | 5.85 | 6.13 | 5.14 |
| NTF4               | 5.84 | 6.56 | 5.31 |
| CFL2               | 5.84 | 6.29 | 5.42 |
| ANKLE2             | 5.84 | 6.40 | 5.06 |
| MRPS33             | 5.84 | 6.17 | 5.62 |
| RNF219             | 5.84 | 6.29 | 5.23 |
| PKIG               | 5.84 | 6.14 | 5.36 |
| RAB32              | 5.84 | 6.52 | 4.94 |
| PREP               | 5.84 | 6.46 | 4.86 |
| SNORA7B            | 5.84 | 6.54 | 5.20 |
| ADI1               | 5.84 | 6.04 | 5.56 |
| RNFT1              | 5.84 | 6.42 | 5.33 |
| LOC646862          | 5.84 | 6.35 | 5.05 |
| EIF2B5             | 5.84 | 6.10 | 5.15 |
| DUSP12             | 5.84 | 6.22 | 5.38 |
| PSME3              | 5.84 | 6.33 | 5.15 |

|              |      |      |      |
|--------------|------|------|------|
| SLC12A2      | 5.84 | 6.33 | 5.62 |
| HRCT1        | 5.84 | 6.16 | 4.93 |
| NUDT5        | 5.84 | 6.37 | 5.10 |
| DDIT4        | 5.84 | 6.64 | 5.04 |
| NAA15        | 5.84 | 6.38 | 5.24 |
| TPST1        | 5.84 | 6.35 | 5.24 |
| CLIP4        | 5.84 | 6.46 | 5.32 |
| CYB5D2       | 5.84 | 6.12 | 5.47 |
| ATAD2B       | 5.84 | 6.29 | 5.33 |
| BMPR1A       | 5.84 | 6.71 | 5.05 |
| LINC00933    | 5.84 | 6.17 | 5.56 |
| ADARB1       | 5.84 | 6.25 | 5.27 |
| SNAPC5       | 5.84 | 6.08 | 5.53 |
| SLC9B2       | 5.84 | 6.50 | 5.36 |
| NAP1L5       | 5.84 | 6.15 | 5.55 |
| ATAT1        | 5.84 | 6.01 | 5.64 |
| GPX7         | 5.84 | 6.46 | 4.81 |
| CDKN2AIP     | 5.84 | 6.09 | 5.33 |
| SLC43A1      | 5.84 | 6.11 | 5.41 |
| WDR91        | 5.84 | 6.11 | 5.28 |
| ADPRHL1      | 5.84 | 6.26 | 5.56 |
| UQCRQ        | 5.84 | 6.08 | 5.59 |
| NOP14        | 5.84 | 6.26 | 5.41 |
| C6orf15      | 5.84 | 6.33 | 5.65 |
| IFT122       | 5.84 | 6.14 | 5.29 |
| CTAG2        | 5.84 | 6.11 | 5.61 |
| TBC1D3G      | 5.84 | 6.06 | 5.48 |
| FAM135A      | 5.84 | 6.18 | 5.50 |
| CA5B         | 5.84 | 6.80 | 4.75 |
| FXVD6        | 5.84 | 6.07 | 5.54 |
| LOC100128075 | 5.84 | 6.29 | 5.40 |
| MORC4        | 5.84 | 6.69 | 4.88 |
| GARS         | 5.84 | 6.83 | 4.96 |
| ZNF286A      | 5.84 | 6.34 | 4.96 |
| BCOR         | 5.84 | 6.23 | 5.52 |
| ZNF738       | 5.84 | 6.12 | 5.56 |
| FYCO1        | 5.84 | 6.39 | 4.96 |
| KLF16        | 5.84 | 6.36 | 5.37 |
| EXO1         | 5.84 | 6.09 | 5.35 |
| FAM3C        | 5.84 | 6.40 | 5.22 |
| LEPREL4      | 5.84 | 6.10 | 5.56 |
| SCAF8        | 5.84 | 6.17 | 5.22 |
| RNF169       | 5.84 | 6.24 | 5.30 |
| TMEM140      | 5.84 | 6.09 | 5.57 |
| MKNK2        | 5.84 | 6.21 | 5.56 |
| EXOSC1       | 5.84 | 6.39 | 5.21 |
| SLCO3A1      | 5.84 | 6.15 | 5.33 |
| MIR4492      | 5.84 | 6.24 | 5.33 |
| VASP         | 5.84 | 6.01 | 5.49 |

|                    |      |      |      |
|--------------------|------|------|------|
| PPP1R1A            | 5.84 | 6.54 | 4.98 |
| TNPO3              | 5.84 | 6.18 | 5.43 |
| HMGN4              | 5.83 | 6.32 | 4.64 |
| RNF5               | 5.83 | 6.05 | 5.66 |
| SYAP1              | 5.83 | 6.66 | 4.93 |
| KIAA1143           | 5.83 | 6.21 | 5.41 |
| ANGPT2             | 5.83 | 6.95 | 5.07 |
| CARM1              | 5.83 | 6.29 | 5.42 |
| EVA1B              | 5.83 | 6.54 | 5.30 |
| ATP1A1OS           | 5.83 | 6.08 | 5.31 |
| OTTHUMG00000150771 | 5.83 | 6.23 | 5.53 |
| CENPT              | 5.83 | 6.15 | 5.62 |
| RNF14              | 5.83 | 6.14 | 5.21 |
| SNORD10            | 5.83 | 6.29 | 5.56 |
| UBXN1              | 5.83 | 6.22 | 5.42 |
| USMG5              | 5.83 | 6.13 | 5.42 |
| PRDX4              | 5.83 | 6.50 | 4.94 |
| C6orf47-AS1        | 5.83 | 6.30 | 5.13 |
| OTTHUMG00000057531 | 5.83 | 6.30 | 5.13 |
| ZSCAN26            | 5.83 | 6.22 | 5.49 |
| DDX11              | 5.83 | 6.14 | 5.50 |
| HPS4               | 5.83 | 6.03 | 5.50 |
| CRYBG3             | 5.83 | 6.37 | 5.45 |
| NDUFS1             | 5.83 | 6.39 | 5.05 |
| TMEM91             | 5.83 | 6.18 | 5.39 |
| EML4               | 5.83 | 6.19 | 5.19 |
| SIVA1              | 5.83 | 6.13 | 5.34 |
| CRKL               | 5.83 | 6.22 | 5.18 |
| NEU2               | 5.83 | 6.36 | 5.35 |
| NUDT3              | 5.83 | 5.97 | 5.47 |
| NOL10              | 5.83 | 6.24 | 5.39 |
| FLT3LG             | 5.83 | 6.27 | 5.45 |
| NEK8               | 5.83 | 6.12 | 5.45 |
| PLRG1              | 5.83 | 6.46 | 5.22 |
| CUL5               | 5.83 | 6.31 | 5.31 |
| LPCAT2             | 5.83 | 6.51 | 5.34 |
| TTC21B             | 5.83 | 6.16 | 5.21 |
| TEX2               | 5.83 | 6.21 | 5.46 |
| SVIL               | 5.83 | 6.08 | 5.23 |
| SRFBP1             | 5.83 | 6.46 | 5.00 |
| LAMA2              | 5.83 | 6.77 | 4.72 |
| ATP6V1D            | 5.83 | 6.50 | 5.28 |
| PAQR6              | 5.83 | 6.35 | 5.55 |
| LOC401589          | 5.83 | 6.21 | 5.34 |
| ARHGAP5            | 5.83 | 6.34 | 5.33 |
| TMEM19             | 5.83 | 6.23 | 5.32 |
| FLNB               | 5.83 | 6.32 | 5.53 |
| CDKL1              | 5.83 | 6.03 | 5.57 |
| MLXIP              | 5.83 | 6.37 | 5.35 |

|                    |      |      |      |
|--------------------|------|------|------|
| FBX08              | 5.83 | 6.48 | 4.93 |
| PRCD               | 5.83 | 6.30 | 5.58 |
| CA11               | 5.83 | 6.21 | 5.40 |
| CST4               | 5.83 | 6.21 | 5.45 |
| LOC150776          | 5.83 | 6.49 | 5.30 |
| SEPSECS            | 5.83 | 6.48 | 5.29 |
| PRSS22             | 5.83 | 6.17 | 5.54 |
| FH                 | 5.83 | 6.39 | 5.11 |
| IFRD1              | 5.83 | 6.10 | 5.33 |
| TNFAIP2            | 5.83 | 6.13 | 5.35 |
| TM2D3              | 5.83 | 6.00 | 5.44 |
| PLAA               | 5.83 | 6.58 | 5.13 |
| DAXX               | 5.83 | 6.21 | 5.35 |
| FEM1C              | 5.83 | 6.48 | 5.20 |
| CCS                | 5.83 | 6.06 | 5.49 |
| AREL1              | 5.83 | 6.36 | 5.38 |
| FAM90A10P          | 5.83 | 6.28 | 5.45 |
| TRBV23OR9-2        | 5.83 | 6.14 | 5.50 |
| OTTHUMG00000013926 | 5.83 | 6.30 | 5.42 |
| COA1               | 5.82 | 6.12 | 5.41 |
| SNORD56B           | 5.82 | 6.40 | 5.18 |
| RNF4               | 5.82 | 6.17 | 5.14 |
| DECR2              | 5.82 | 6.07 | 5.63 |
| ARFIP1             | 5.82 | 6.16 | 5.21 |
| THG1L              | 5.82 | 6.22 | 5.35 |
| RNH1               | 5.82 | 6.14 | 5.49 |
| SIX3               | 5.82 | 6.10 | 5.50 |
| PLBD2              | 5.82 | 6.31 | 5.42 |
| ZGPAT              | 5.82 | 6.44 | 5.46 |
| CBR1               | 5.82 | 6.05 | 5.52 |
| OGFRL1             | 5.82 | 6.11 | 5.25 |
| HERC2              | 5.82 | 5.97 | 5.64 |
| PMEPA1             | 5.82 | 6.44 | 5.30 |
| NUP43              | 5.82 | 6.72 | 5.01 |
| ZNF512             | 5.82 | 6.17 | 5.51 |
| ATF7IP2            | 5.82 | 6.15 | 5.44 |
| ZNF808             | 5.82 | 6.27 | 5.26 |
| PDCD4-AS1          | 5.82 | 6.21 | 5.37 |
| IFITM4P            | 5.82 | 6.28 | 5.40 |
| PPP1R35            | 5.82 | 6.01 | 5.47 |
| HLA-DPB2           | 5.82 | 6.81 | 5.30 |
| CDK8               | 5.82 | 6.67 | 5.06 |
| RPL14              | 5.82 | 6.00 | 5.68 |
| PPIAP30            | 5.82 | 6.26 | 5.54 |
| PCGF3              | 5.82 | 6.16 | 5.33 |
| C11orf48           | 5.82 | 6.27 | 5.38 |
| ADH1C              | 5.82 | 6.56 | 5.13 |
| LBR                | 5.82 | 6.12 | 5.52 |
| ANKRD37            | 5.82 | 6.47 | 5.20 |

|                    |      |      |      |
|--------------------|------|------|------|
| FGD5               | 5.82 | 6.16 | 5.37 |
| TUBGCP2            | 5.82 | 6.25 | 4.84 |
| LRRC57             | 5.82 | 6.06 | 5.31 |
| LINC00341          | 5.82 | 6.27 | 5.52 |
| ZNF548             | 5.82 | 6.11 | 5.44 |
| TRRAP              | 5.82 | 5.99 | 5.56 |
| GLTP               | 5.82 | 6.24 | 5.35 |
| H1FOO              | 5.82 | 6.04 | 5.68 |
| RNF2               | 5.82 | 6.17 | 5.23 |
| FAM180A            | 5.82 | 7.08 | 4.61 |
| ARHGAP31           | 5.82 | 6.29 | 5.55 |
| B4GALT6            | 5.82 | 6.51 | 5.12 |
| SPG7               | 5.82 | 6.12 | 5.25 |
| PLEKHA6            | 5.82 | 6.49 | 5.54 |
| AP1M1              | 5.82 | 6.16 | 5.44 |
| C21orf59           | 5.82 | 6.29 | 5.19 |
| EXOSC4             | 5.82 | 6.39 | 5.45 |
| XRCC3              | 5.82 | 6.14 | 5.45 |
| CLCN6              | 5.82 | 6.25 | 4.98 |
| SNORA80B           | 5.82 | 6.45 | 5.37 |
| VDAC2              | 5.82 | 6.14 | 4.96 |
| MOSPD3             | 5.82 | 6.17 | 5.26 |
| PDE8A              | 5.82 | 6.12 | 5.14 |
| PPIA               | 5.82 | 6.34 | 5.27 |
| FAM106A            | 5.81 | 6.34 | 5.40 |
| FAM132A            | 5.81 | 6.35 | 5.47 |
| MESDC1             | 5.81 | 6.00 | 5.47 |
| RBM28              | 5.81 | 6.20 | 5.37 |
| LRRC47             | 5.81 | 6.42 | 5.39 |
| LOC100506999       | 5.81 | 6.19 | 5.58 |
| TCF19              | 5.81 | 6.25 | 5.42 |
| DDX11L9            | 5.81 | 6.38 | 5.28 |
| ODF2               | 5.81 | 6.14 | 5.37 |
| GNB2               | 5.81 | 6.18 | 5.33 |
| GLUD1P2            | 5.81 | 5.97 | 5.40 |
| KIAA1432           | 5.81 | 6.22 | 5.31 |
| CNOT11             | 5.81 | 6.07 | 5.57 |
| SLC35A2            | 5.81 | 6.29 | 5.53 |
| ZC3H8              | 5.81 | 6.38 | 5.22 |
| OTTHUMG00000149585 | 5.81 | 7.31 | 4.48 |
| SLC25A46           | 5.81 | 6.26 | 5.29 |
| CYP51A1            | 5.81 | 6.10 | 5.17 |
| GTPBP10            | 5.81 | 6.09 | 5.47 |
| JAGN1              | 5.81 | 6.23 | 5.44 |
| OTTHUMG00000179792 | 5.81 | 6.28 | 5.24 |
| DCAF12             | 5.81 | 6.05 | 5.32 |
| RPL38              | 5.81 | 6.02 | 5.66 |
| LTA                | 5.81 | 6.14 | 5.44 |
| CASP16             | 5.81 | 6.10 | 5.42 |

|                    |      |      |      |
|--------------------|------|------|------|
| DNAJB9             | 5.81 | 6.15 | 5.30 |
| BCL9L              | 5.81 | 6.21 | 5.40 |
| TXNDC12            | 5.81 | 6.16 | 5.44 |
| OTTHUMG00000074727 | 5.81 | 6.31 | 4.99 |
| NEURL              | 5.81 | 6.25 | 5.59 |
| LIMS2              | 5.81 | 6.39 | 5.16 |
| CTSL1P2            | 5.81 | 6.08 | 5.45 |
| HLA-DQB2           | 5.81 | 6.25 | 5.44 |
| LOC100288911       | 5.81 | 6.69 | 4.50 |
| FTSJ3              | 5.81 | 5.93 | 5.62 |
| FAM214A            | 5.81 | 6.18 | 5.22 |
| TRIM27             | 5.81 | 6.19 | 5.30 |
| TTYH3              | 5.81 | 6.24 | 5.56 |
| PGAM2              | 5.81 | 6.73 | 5.19 |
| MIR320D1           | 5.81 | 6.72 | 5.23 |
| ANP32B             | 5.81 | 6.09 | 5.21 |
| FUCA1              | 5.81 | 7.25 | 4.91 |
| GUCA2A             | 5.81 | 6.30 | 5.65 |
| TSPYL4             | 5.81 | 6.13 | 5.47 |
| DYNLL2             | 5.81 | 5.98 | 5.46 |
| DCHS1              | 5.81 | 6.46 | 5.14 |
| DDB1               | 5.81 | 6.16 | 5.45 |
| CCDC127            | 5.81 | 6.19 | 5.41 |
| NFATC2IP           | 5.81 | 6.09 | 5.23 |
| B4GALT3            | 5.81 | 6.02 | 5.44 |
| ZNF12              | 5.81 | 6.49 | 5.31 |
| ROBO4              | 5.81 | 6.04 | 5.27 |
| MDH2               | 5.81 | 6.13 | 5.30 |
| GNG7               | 5.81 | 6.04 | 5.44 |
| UBE3C              | 5.81 | 6.44 | 5.21 |
| RHOQ               | 5.81 | 6.18 | 5.35 |
| MNAT1              | 5.81 | 6.44 | 5.05 |
| METTL21B           | 5.81 | 6.07 | 5.64 |
| NUCB1              | 5.81 | 6.17 | 5.24 |
| TMED5              | 5.81 | 6.34 | 5.28 |
| KIF1C              | 5.81 | 6.15 | 5.43 |
| TATDN1             | 5.81 | 6.12 | 5.05 |
| RARG               | 5.81 | 6.09 | 5.33 |
| UGCG               | 5.81 | 6.35 | 5.04 |
| RHOQ               | 5.81 | 6.28 | 5.44 |
| CHURC1-FNTB        | 5.81 | 5.99 | 5.37 |
| CELF2              | 5.81 | 6.34 | 5.16 |
| ACACA              | 5.80 | 6.12 | 5.10 |
| RIOK1              | 5.80 | 6.26 | 5.14 |
| SLC25A17           | 5.80 | 6.24 | 5.37 |
| LINC00674          | 5.80 | 6.53 | 5.39 |
| CREB1              | 5.80 | 6.16 | 4.95 |
| AP1G2              | 5.80 | 6.23 | 5.44 |
| PARP2              | 5.80 | 6.07 | 5.05 |

|                    |      |      |      |
|--------------------|------|------|------|
| LOC100499489       | 5.80 | 6.19 | 5.44 |
| A2M-AS1            | 5.80 | 6.33 | 5.37 |
| MORC2              | 5.80 | 6.03 | 5.37 |
| RHOT2              | 5.80 | 6.15 | 5.32 |
| SIRT2              | 5.80 | 6.09 | 5.43 |
| LAS1L              | 5.80 | 6.21 | 5.33 |
| SPATS2             | 5.80 | 6.23 | 5.23 |
| GPR183             | 5.80 | 7.04 | 5.12 |
| ASAP3              | 5.80 | 6.03 | 5.43 |
| AUTS2              | 5.80 | 6.47 | 5.46 |
| DNAJB12            | 5.80 | 6.14 | 5.15 |
| CDS2               | 5.80 | 6.23 | 5.50 |
| ARID2              | 5.80 | 6.22 | 5.26 |
| TESK1              | 5.80 | 6.11 | 5.52 |
| ZNF98              | 5.80 | 6.09 | 5.41 |
| SMC6               | 5.80 | 6.16 | 5.26 |
| OTUD4              | 5.80 | 6.20 | 5.50 |
| AMT                | 5.80 | 6.06 | 5.51 |
| NPAT               | 5.80 | 6.25 | 4.94 |
| OTTHUMG00000140107 | 5.80 | 6.82 | 4.58 |
| MRPS26             | 5.80 | 6.11 | 5.62 |
| WDR48              | 5.80 | 6.18 | 5.11 |
| ATG9A              | 5.80 | 6.15 | 5.43 |
| TNFRSF14           | 5.80 | 6.24 | 5.14 |
| MESDC2             | 5.80 | 6.14 | 5.37 |
| SNRNP48            | 5.80 | 6.14 | 5.15 |
| CRCP               | 5.80 | 6.05 | 5.54 |
| ASXL2              | 5.80 | 6.14 | 5.23 |
| OTTHUMG00000002915 | 5.80 | 6.28 | 5.48 |
| OSTM1              | 5.80 | 6.13 | 5.16 |
| GNPTG              | 5.80 | 6.10 | 5.58 |
| C18orf8            | 5.80 | 6.47 | 5.15 |
| RASA3              | 5.80 | 6.55 | 5.10 |
| EIF3H              | 5.80 | 5.95 | 5.50 |
| ATPAF1             | 5.80 | 6.06 | 5.50 |
| C15orf40           | 5.80 | 5.92 | 5.63 |
| STXBP5             | 5.80 | 6.63 | 5.09 |
| TLL7               | 5.80 | 6.34 | 5.35 |
| PCK2               | 5.80 | 6.14 | 5.45 |
| RPAP3              | 5.80 | 6.38 | 5.21 |
| BIRC2              | 5.80 | 6.28 | 5.15 |
| LAT                | 5.80 | 6.13 | 5.38 |
| STAB1              | 5.80 | 6.13 | 5.51 |
| ADRM1              | 5.80 | 6.01 | 5.26 |
| MCOLN1             | 5.80 | 6.13 | 5.48 |
| LTA4H              | 5.80 | 6.37 | 5.39 |
| LOC554174          | 5.80 | 6.00 | 5.56 |
| RILPL2             | 5.80 | 6.05 | 5.46 |
| DEDD2              | 5.80 | 6.07 | 5.50 |



|              |      |      |      |
|--------------|------|------|------|
| CERK         | 5.80 | 6.07 | 5.55 |
| CBL          | 5.80 | 6.34 | 5.14 |
| TMEM54       | 5.80 | 6.19 | 5.41 |
| EPT1         | 5.79 | 6.34 | 5.26 |
| HLA-DQB1-AS1 | 5.79 | 6.81 | 4.69 |
| RNA5SP279    | 5.79 | 6.18 | 5.31 |
| MRPL19       | 5.79 | 6.27 | 5.29 |
| ZNF562       | 5.79 | 6.34 | 5.24 |
| SLC35F3      | 5.79 | 5.96 | 5.52 |
| C6orf106     | 5.79 | 6.29 | 5.29 |
| MRPL32       | 5.79 | 6.12 | 5.35 |
| C16orf11     | 5.79 | 6.19 | 5.33 |
| WISP1        | 5.79 | 6.96 | 4.75 |
| FMNL3        | 5.79 | 6.32 | 4.98 |
| CEP135       | 5.79 | 6.10 | 5.22 |
| RNF6         | 5.79 | 6.46 | 5.09 |
| TSHZ1        | 5.79 | 6.08 | 5.48 |
| NSMAF        | 5.79 | 6.09 | 5.32 |
| IGLV2-8      | 5.79 | 6.28 | 5.30 |
| CADM3        | 5.79 | 6.69 | 5.22 |
| EMC8         | 5.79 | 5.95 | 5.57 |
| UST          | 5.79 | 6.86 | 5.24 |
| CAPZB        | 5.79 | 6.83 | 4.62 |
| SNX18        | 5.79 | 6.29 | 5.04 |
| NOL9         | 5.79 | 6.21 | 5.39 |
| ABI3         | 5.79 | 6.27 | 5.54 |
| TMEM86A      | 5.79 | 6.14 | 5.35 |
| RRM1         | 5.79 | 6.31 | 5.31 |
| SNORA52      | 5.79 | 5.95 | 5.54 |
| LDLRAP1      | 5.79 | 5.94 | 5.52 |
| PLEKHB2      | 5.79 | 6.38 | 5.39 |
| DYNLRB1      | 5.79 | 6.07 | 5.61 |
| POLR2J       | 5.79 | 6.48 | 5.23 |
| SFTPD        | 5.79 | 6.35 | 5.07 |
| LOC100507474 | 5.79 | 6.23 | 5.33 |
| PHB          | 5.79 | 6.11 | 5.41 |
| RRAS2        | 5.79 | 6.19 | 5.34 |
| SEMA6D       | 5.79 | 6.54 | 5.41 |
| RHBDD2       | 5.79 | 6.13 | 5.59 |
| RAD52        | 5.79 | 6.14 | 5.51 |
| FRMD8P1      | 5.79 | 6.21 | 5.24 |
| TP53I3       | 5.79 | 6.54 | 5.24 |
| GAA          | 5.79 | 6.18 | 5.45 |
| KATNB1       | 5.79 | 6.08 | 5.59 |
| PPCS         | 5.79 | 6.11 | 5.17 |
| PART1        | 5.79 | 6.15 | 5.55 |
| TAMM41       | 5.79 | 6.10 | 5.56 |
| ZNF354A      | 5.79 | 6.29 | 5.21 |
| ZNF506       | 5.79 | 6.21 | 5.13 |

|                    |      |      |      |
|--------------------|------|------|------|
| ARHGEF11           | 5.79 | 6.16 | 5.35 |
| LSMEM2             | 5.79 | 6.46 | 5.33 |
| ARHGAP10           | 5.79 | 6.04 | 5.04 |
| CHRFAM7A           | 5.79 | 6.07 | 5.25 |
| MPEG1              | 5.79 | 6.53 | 5.02 |
| TUBA4B             | 5.79 | 6.27 | 5.37 |
| SPAG16             | 5.79 | 6.02 | 5.46 |
| LOC643072          | 5.79 | 6.24 | 5.28 |
| FAM173A            | 5.79 | 6.47 | 4.95 |
| OTTHUMG00000169178 | 5.79 | 6.42 | 5.13 |
| RAB35              | 5.79 | 6.11 | 5.23 |
| KIAA1549           | 5.79 | 6.60 | 4.95 |
| KIFC1              | 5.79 | 6.01 | 5.37 |
| LRP11              | 5.79 | 6.05 | 5.26 |
| MRPL43             | 5.78 | 6.18 | 5.41 |
| COPRS              | 5.78 | 6.26 | 5.00 |
| PIWIL4             | 5.78 | 6.50 | 5.02 |
| SLC23A1            | 5.78 | 6.20 | 5.30 |
| METRNL             | 5.78 | 6.87 | 4.80 |
| VPS4A              | 5.78 | 6.43 | 4.91 |
| ABCB10             | 5.78 | 6.09 | 5.23 |
| ACYP2              | 5.78 | 6.18 | 5.30 |
| TREX2              | 5.78 | 6.29 | 4.87 |
| APEH               | 5.78 | 6.13 | 5.39 |
| FANCL              | 5.78 | 6.60 | 5.02 |
| WASIR2             | 5.78 | 6.21 | 5.45 |
| ZDHH5              | 5.78 | 6.25 | 5.30 |
| FOSL2              | 5.78 | 6.32 | 5.23 |
| TMEM106C           | 5.78 | 6.00 | 5.58 |
| SLC25A53           | 5.78 | 6.09 | 5.50 |
| PI4K2B             | 5.78 | 6.47 | 5.18 |
| CLNS1A             | 5.78 | 6.04 | 5.56 |
| SMKR1              | 5.78 | 6.31 | 5.38 |
| VIMP               | 5.78 | 6.30 | 5.33 |
| CSRP1              | 5.78 | 6.05 | 5.45 |
| SULT1C2            | 5.78 | 6.60 | 5.42 |
| CENPB              | 5.78 | 5.99 | 5.47 |
| KDM6A              | 5.78 | 6.41 | 5.03 |
| AGT                | 5.78 | 6.47 | 5.25 |
| CAMK2N1            | 5.78 | 7.10 | 5.09 |
| FOXJ3              | 5.78 | 6.06 | 5.55 |
| C1QTNF6            | 5.78 | 6.36 | 5.30 |
| C6orf203           | 5.78 | 6.16 | 5.21 |
| OTTHUMG00000041230 | 5.78 | 6.22 | 5.36 |
| LOC400464          | 5.78 | 6.11 | 5.41 |
| TXLNG              | 5.78 | 6.20 | 5.19 |
| FBXO4              | 5.78 | 6.23 | 5.19 |
| BCL2               | 5.78 | 6.51 | 4.83 |
| CAPZA2             | 5.78 | 6.33 | 5.00 |

|                    |      |      |      |
|--------------------|------|------|------|
| VWCE               | 5.78 | 6.17 | 5.42 |
| TMC4               | 5.78 | 6.15 | 5.37 |
| AGO1               | 5.78 | 5.99 | 5.52 |
| ELAC2              | 5.78 | 6.11 | 5.38 |
| ULK2               | 5.78 | 5.98 | 5.33 |
| TTC7A              | 5.78 | 6.12 | 5.14 |
| ELP5               | 5.78 | 6.09 | 5.55 |
| ZDHHC7             | 5.78 | 6.36 | 4.98 |
| STK19              | 5.78 | 6.10 | 5.54 |
| HIST1H2BM          | 5.78 | 7.48 | 4.73 |
| OTTHUMG00000160454 | 5.78 | 6.40 | 4.90 |
| DNMT1              | 5.78 | 6.10 | 5.29 |
| MARCO              | 5.78 | 7.23 | 4.73 |
| CLDND2             | 5.78 | 6.26 | 5.44 |
| TSC2               | 5.78 | 5.93 | 5.52 |
| RNU7-25P           | 5.78 | 6.32 | 5.40 |
| C1orf148           | 5.78 | 6.11 | 5.52 |
| SLC37A2            | 5.78 | 6.53 | 4.93 |
| ZBTB21             | 5.78 | 6.69 | 5.07 |
| SETBP1             | 5.78 | 6.10 | 5.32 |
| TRAF3              | 5.78 | 6.10 | 5.37 |
| ZNF407             | 5.78 | 6.02 | 5.26 |
| VIPAS39            | 5.78 | 6.10 | 5.21 |
| GPC1               | 5.78 | 6.06 | 5.60 |
| PTAFR              | 5.78 | 6.52 | 5.03 |
| CLEC2D             | 5.78 | 6.20 | 5.46 |
| KLF12              | 5.78 | 6.46 | 4.69 |
| SOWAHA             | 5.78 | 5.99 | 5.43 |
| AMN1               | 5.78 | 6.02 | 5.62 |
| CEP89              | 5.78 | 6.29 | 5.33 |
| TCEAL5             | 5.78 | 6.37 | 5.30 |
| GPR116             | 5.77 | 7.15 | 4.14 |
| SLN                | 5.77 | 6.93 | 4.90 |
| C6orf136           | 5.77 | 6.03 | 5.45 |
| LINC00961          | 5.77 | 6.37 | 5.13 |
| NHP2L1             | 5.77 | 6.08 | 5.60 |
| ABCA1              | 5.77 | 6.36 | 5.15 |
| YIPF1              | 5.77 | 6.22 | 5.32 |
| SLC27A3            | 5.77 | 6.10 | 5.27 |
| NUP155             | 5.77 | 6.21 | 5.11 |
| TPRG1L             | 5.77 | 6.21 | 5.08 |
| KIR2DL3            | 5.77 | 6.25 | 5.22 |
| ESYT1              | 5.77 | 6.04 | 5.31 |
| TP53               | 5.77 | 6.10 | 5.37 |
| FAM50A             | 5.77 | 6.14 | 5.36 |
| WDR26              | 5.77 | 6.20 | 4.95 |
| BMP1               | 5.77 | 6.48 | 5.18 |
| LOC730102          | 5.77 | 6.33 | 5.48 |
| SLC38A3            | 5.77 | 6.22 | 5.16 |

|            |      |      |      |
|------------|------|------|------|
| ZMYND8     | 5.77 | 5.94 | 5.48 |
| LOC728392  | 5.77 | 6.67 | 4.97 |
| ZDHHC21    | 5.77 | 6.43 | 4.95 |
| AHRR       | 5.77 | 6.05 | 5.59 |
| EIF1AD     | 5.77 | 6.01 | 5.45 |
| MTRF1      | 5.77 | 6.19 | 5.26 |
| NUP93      | 5.77 | 6.18 | 4.92 |
| RBAK       | 5.77 | 6.11 | 5.51 |
| ASGR2      | 5.77 | 6.29 | 5.43 |
| MIR1231    | 5.77 | 6.19 | 5.39 |
| NR1D2      | 5.77 | 6.37 | 4.42 |
| APBA1      | 5.77 | 6.02 | 5.54 |
| SMC2       | 5.77 | 6.47 | 5.18 |
| TMEM18     | 5.77 | 5.97 | 5.53 |
| IFFO1      | 5.77 | 6.25 | 5.40 |
| SCAP       | 5.77 | 6.25 | 5.52 |
| KRTAP5-6   | 5.77 | 6.42 | 5.48 |
| KCNF1      | 5.77 | 6.06 | 5.30 |
| SLC7A6     | 5.77 | 6.00 | 5.22 |
| KCTD11     | 5.77 | 6.09 | 5.48 |
| GOLGA8EP   | 5.77 | 6.18 | 4.80 |
| KDM4A      | 5.77 | 6.02 | 5.33 |
| DMWD       | 5.77 | 6.17 | 5.31 |
| LOC285300  | 5.77 | 6.53 | 5.07 |
| PLAGL2     | 5.77 | 6.02 | 5.53 |
| ATXN10     | 5.77 | 6.35 | 4.99 |
| CSDC2      | 5.77 | 6.16 | 5.54 |
| EIF4E2     | 5.77 | 6.39 | 5.29 |
| FAM86A     | 5.77 | 6.22 | 5.42 |
| TMED3      | 5.77 | 6.13 | 5.47 |
| LY75-CD302 | 5.77 | 6.62 | 5.10 |
| NPAS2      | 5.77 | 6.57 | 4.89 |
| COQ9       | 5.77 | 5.97 | 5.49 |
| ANGPTL6    | 5.77 | 5.98 | 5.54 |
| PCSK7      | 5.77 | 5.93 | 5.57 |
| NRIP2      | 5.77 | 5.92 | 5.67 |
| SLC35B1    | 5.77 | 6.06 | 5.40 |
| LARP4B     | 5.77 | 6.08 | 5.45 |
| JSRP1      | 5.77 | 6.02 | 5.61 |
| EBNA1BP2   | 5.77 | 6.01 | 5.30 |
| INIP       | 5.77 | 6.25 | 5.15 |
| NUTM2A     | 5.77 | 5.94 | 5.41 |
| MIR502     | 5.77 | 6.32 | 4.95 |
| TBXA2R     | 5.77 | 6.09 | 5.31 |
| MRPS9      | 5.77 | 6.11 | 5.09 |
| ANK2       | 5.77 | 6.38 | 5.01 |
| GNAZ       | 5.77 | 6.01 | 5.54 |
| SPIN4      | 5.77 | 6.05 | 5.26 |
| OR2T34     | 5.77 | 6.81 | 5.04 |

|                    |      |      |      |
|--------------------|------|------|------|
| EFHC1              | 5.77 | 6.02 | 5.17 |
| MRPL27             | 5.77 | 6.10 | 5.54 |
| SPATA18            | 5.77 | 6.33 | 5.17 |
| PPP1R12B           | 5.76 | 6.04 | 5.38 |
| NADK2              | 5.76 | 6.16 | 5.34 |
| ANKRD27            | 5.76 | 6.13 | 5.23 |
| FTSJ1              | 5.76 | 6.11 | 5.52 |
| FAM115C            | 5.76 | 6.58 | 5.18 |
| OTTHUMG00000172608 | 5.76 | 6.18 | 5.23 |
| CARKD              | 5.76 | 5.89 | 5.59 |
| UBXN7              | 5.76 | 6.23 | 5.01 |
| SLIT2              | 5.76 | 6.66 | 4.89 |
| SNORD123           | 5.76 | 6.53 | 4.76 |
| ARHGEF9            | 5.76 | 6.09 | 5.12 |
| ZNF259             | 5.76 | 5.98 | 5.40 |
| FXVD1              | 5.76 | 6.27 | 5.01 |
| SLC6A10P           | 5.76 | 6.18 | 5.23 |
| INO80E             | 5.76 | 5.98 | 5.56 |
| MRPL46             | 5.76 | 6.11 | 5.21 |
| CTR9               | 5.76 | 6.25 | 5.30 |
| ALKBH3             | 5.76 | 6.18 | 5.18 |
| EMD                | 5.76 | 6.38 | 5.25 |
| MGC27345           | 5.76 | 6.49 | 4.94 |
| H2AFZ              | 5.76 | 6.37 | 5.27 |
| TMX4               | 5.76 | 6.34 | 5.07 |
| RASAL3             | 5.76 | 6.03 | 5.44 |
| TMCO6              | 5.76 | 5.97 | 5.51 |
| IPO8               | 5.76 | 6.29 | 5.11 |
| B3GALNT2           | 5.76 | 5.96 | 5.28 |
| HSPA12B            | 5.76 | 6.11 | 5.39 |
| EIF2AK4            | 5.76 | 6.18 | 5.44 |
| DECR1              | 5.76 | 6.01 | 5.48 |
| ME2                | 5.76 | 6.72 | 5.11 |
| RANGRF             | 5.76 | 6.28 | 5.27 |
| DUSP18             | 5.76 | 6.59 | 4.90 |
| GSN                | 5.76 | 6.24 | 5.23 |
| HSPBP1             | 5.76 | 6.10 | 5.42 |
| TP53INP1           | 5.76 | 6.27 | 5.02 |
| DPP8               | 5.76 | 6.15 | 5.30 |
| KCTD7              | 5.76 | 6.24 | 5.49 |
| PEX13              | 5.76 | 6.13 | 5.38 |
| NAA16              | 5.76 | 6.08 | 5.50 |
| GSTA5              | 5.76 | 6.42 | 5.30 |
| PLSCR1             | 5.76 | 6.23 | 5.31 |
| LOC100303749       | 5.76 | 6.22 | 5.11 |
| MAP3K1             | 5.76 | 6.34 | 5.30 |
| TM2D1              | 5.76 | 5.99 | 5.41 |
| TBC1D1             | 5.76 | 6.11 | 5.38 |
| PMF1-BGLAP         | 5.76 | 6.56 | 5.39 |

|                    |      |      |      |
|--------------------|------|------|------|
| TTC27              | 5.76 | 6.08 | 5.39 |
| WDR45B             | 5.76 | 6.20 | 5.30 |
| TMEM9B             | 5.76 | 6.05 | 5.29 |
| IFI35              | 5.76 | 6.16 | 5.35 |
| LINC00163          | 5.76 | 6.03 | 5.31 |
| GLIS3-AS1          | 5.76 | 6.63 | 5.17 |
| TAZ                | 5.76 | 6.07 | 5.52 |
| MIR338             | 5.76 | 5.90 | 5.52 |
| KIF16B             | 5.76 | 6.03 | 5.17 |
| KLF8               | 5.76 | 6.43 | 4.67 |
| OTTHUMG00000176522 | 5.76 | 6.17 | 5.28 |
| TBX18              | 5.76 | 6.12 | 5.39 |
| RNF170             | 5.76 | 6.20 | 5.00 |
| SMG7               | 5.76 | 6.17 | 5.05 |
| PRSS57             | 5.76 | 5.98 | 5.41 |
| HCG27              | 5.76 | 6.17 | 5.45 |
| CDIPT              | 5.76 | 5.98 | 5.54 |
| WDR73              | 5.76 | 6.08 | 5.32 |
| ACVR1              | 5.76 | 6.40 | 4.91 |
| C6orf89            | 5.76 | 6.31 | 4.92 |
| OTTHUMG00000172397 | 5.76 | 6.30 | 4.93 |
| OTTHUMG00000013241 | 5.76 | 6.15 | 5.11 |
| SNORD35B           | 5.76 | 6.26 | 4.79 |
| ZNF579             | 5.76 | 6.11 | 5.39 |
| PAXBP1             | 5.76 | 6.38 | 5.20 |
| NFATC4             | 5.76 | 6.15 | 5.24 |
| SERINC2            | 5.76 | 5.98 | 5.43 |
| CIC                | 5.76 | 5.97 | 5.60 |
| MCM3AP             | 5.76 | 6.05 | 5.30 |
| LOC401010          | 5.76 | 6.33 | 5.38 |
| UTP11L             | 5.76 | 6.40 | 5.11 |
| LOC100506282       | 5.75 | 6.39 | 4.92 |
| PRELID1            | 5.75 | 6.21 | 5.39 |
| KIRREL             | 5.75 | 6.29 | 5.18 |
| KMT2D              | 5.75 | 6.05 | 5.33 |
| IDH1               | 5.75 | 5.97 | 5.55 |
| HDAC3              | 5.75 | 6.21 | 5.00 |
| KCTD10             | 5.75 | 6.25 | 5.01 |
| ZFP3               | 5.75 | 6.15 | 5.26 |
| SPG20              | 5.75 | 6.20 | 5.19 |
| LINC00315          | 5.75 | 6.32 | 4.94 |
| PON2               | 5.75 | 6.06 | 5.46 |
| LOC100129033       | 5.75 | 6.32 | 5.26 |
| SLC12A6            | 5.75 | 6.03 | 5.16 |
| UBA7               | 5.75 | 6.36 | 5.38 |
| SERTAD4-AS1        | 5.75 | 6.03 | 5.48 |
| PARP9              | 5.75 | 6.22 | 5.15 |
| BBIP1              | 5.75 | 6.28 | 5.39 |
| PPP1R8             | 5.75 | 6.03 | 5.37 |

|                    |      |      |      |
|--------------------|------|------|------|
| KIAA0020           | 5.75 | 6.43 | 5.17 |
| CELF6              | 5.75 | 6.10 | 5.44 |
| ADAM33             | 5.75 | 6.02 | 5.41 |
| STK36              | 5.75 | 5.95 | 5.51 |
| ZDHHC4             | 5.75 | 6.13 | 5.46 |
| SLC7A6OS           | 5.75 | 6.07 | 5.37 |
| ALG1L2             | 5.75 | 6.42 | 5.18 |
| SIDT2              | 5.75 | 6.13 | 5.31 |
| ITPR1              | 5.75 | 6.71 | 5.27 |
| PFDN1              | 5.75 | 6.05 | 5.10 |
| UHRF2              | 5.75 | 6.36 | 5.08 |
| RBX1               | 5.75 | 6.22 | 5.00 |
| OTTHUMG00000151492 | 5.75 | 6.21 | 5.41 |
| ZNF330             | 5.75 | 6.13 | 5.16 |
| EXOSC8             | 5.75 | 6.05 | 5.19 |
| ANKRD20A12P        | 5.75 | 6.78 | 5.15 |
| H1FX               | 5.75 | 6.07 | 5.06 |
| NOL11              | 5.75 | 6.16 | 5.18 |
| TP53INP2           | 5.75 | 5.95 | 5.58 |
| RAI1               | 5.75 | 6.09 | 5.34 |
| PRICKLE2           | 5.75 | 6.36 | 5.26 |
| IPMK               | 5.75 | 6.20 | 5.28 |
| CCNB1IP1           | 5.75 | 6.21 | 5.48 |
| C11orf24           | 5.75 | 6.44 | 4.93 |
| VPS54              | 5.75 | 6.40 | 5.09 |
| SGCE               | 5.75 | 6.29 | 4.91 |
| FAM86DP            | 5.75 | 6.32 | 5.17 |
| MGAT4B             | 5.75 | 5.96 | 5.51 |
| ZNF236             | 5.75 | 6.13 | 5.29 |
| SLC19A3            | 5.75 | 6.01 | 5.36 |
| FAM46C             | 5.75 | 6.42 | 4.51 |
| TTC9C              | 5.75 | 6.02 | 5.24 |
| LOC100131825       | 5.75 | 6.26 | 5.17 |
| LCE3A              | 5.75 | 6.10 | 5.34 |
| ALDH1L1-AS1        | 5.75 | 6.05 | 5.52 |
| MSH3               | 5.75 | 5.90 | 5.43 |
| SMARCE1            | 5.75 | 6.07 | 5.08 |
| FUT8               | 5.75 | 6.46 | 5.21 |
| B9D1               | 5.75 | 6.01 | 5.46 |
| C5orf22            | 5.75 | 6.12 | 5.22 |
| TRAF3IP2           | 5.74 | 6.27 | 5.18 |
| SIGMAR1            | 5.74 | 6.01 | 5.29 |
| THAP5              | 5.74 | 6.02 | 5.34 |
| NUDT8              | 5.74 | 5.99 | 5.53 |
| AFG3L2             | 5.74 | 6.12 | 5.22 |
| ELK1               | 5.74 | 6.42 | 5.26 |
| TRIM56             | 5.74 | 6.03 | 5.31 |
| KDELR3             | 5.74 | 6.49 | 4.26 |
| OTTHUMG00000171130 | 5.74 | 6.07 | 5.25 |

|                    |      |      |      |
|--------------------|------|------|------|
| KLHL3              | 5.74 | 6.16 | 5.01 |
| FITM2              | 5.74 | 6.21 | 5.13 |
| OTTHUMG00000163061 | 5.74 | 6.22 | 5.40 |
| KDM4C              | 5.74 | 6.16 | 5.46 |
| ZNF260             | 5.74 | 6.38 | 4.80 |
| MIR1911            | 5.74 | 6.45 | 5.18 |
| TMEM8A             | 5.74 | 5.93 | 5.47 |
| LAD1               | 5.74 | 6.09 | 5.32 |
| OTTHUMG00000164320 | 5.74 | 6.73 | 5.08 |
| NGRN               | 5.74 | 6.19 | 5.36 |
| MICAL1             | 5.74 | 6.05 | 5.39 |
| PTGFR              | 5.74 | 6.35 | 5.26 |
| ABCC4              | 5.74 | 5.97 | 5.38 |
| DEAF1              | 5.74 | 6.01 | 5.42 |
| EIF2S1             | 5.74 | 6.53 | 5.06 |
| NMNAT1             | 5.74 | 6.00 | 5.16 |
| DPAGT1             | 5.74 | 6.20 | 5.19 |
| OTTHUMG00000164136 | 5.74 | 6.12 | 5.18 |
| LOC100130015       | 5.74 | 6.05 | 5.37 |
| NDC1               | 5.74 | 5.99 | 5.32 |
| FAM229A            | 5.74 | 6.06 | 5.39 |
| YPEL2              | 5.74 | 6.24 | 4.85 |
| ACOT13             | 5.74 | 6.25 | 5.03 |
| FZR1               | 5.74 | 6.19 | 5.41 |
| POLR3C             | 5.74 | 6.18 | 5.47 |
| JAM2               | 5.74 | 6.53 | 5.12 |
| CCDC107            | 5.74 | 6.35 | 5.32 |
| CTSB               | 5.74 | 6.61 | 4.85 |
| BASP1P1            | 5.74 | 6.45 | 5.27 |
| C1orf50            | 5.74 | 6.01 | 5.56 |
| PNMA1              | 5.74 | 6.12 | 4.98 |
| FKBP1AP1           | 5.74 | 6.14 | 5.03 |
| PTP4A2             | 5.74 | 6.13 | 5.30 |
| CD2AP              | 5.74 | 5.94 | 5.36 |
| FAM138E            | 5.74 | 6.10 | 5.26 |
| HSD17B10           | 5.74 | 5.99 | 5.08 |
| LGR4               | 5.74 | 6.30 | 4.99 |
| SHARPIN            | 5.74 | 6.03 | 5.48 |
| AGPS               | 5.74 | 6.71 | 4.22 |
| CCDC53             | 5.74 | 6.38 | 5.37 |
| SAP30              | 5.74 | 6.39 | 5.01 |
| TRIM8              | 5.74 | 6.01 | 5.07 |
| CD320              | 5.74 | 6.01 | 5.47 |
| KCNC3              | 5.74 | 6.16 | 5.49 |
| CXorf51A           | 5.74 | 6.18 | 5.15 |
| PHLDA1             | 5.74 | 6.24 | 5.37 |
| OCIAD2             | 5.74 | 6.49 | 5.33 |
| OTTHUMG00000162762 | 5.74 | 6.55 | 5.27 |
| CST2               | 5.74 | 6.11 | 5.23 |



|            |      |      |      |
|------------|------|------|------|
| ASPSCR1    | 5.74 | 5.93 | 5.51 |
| ZCCHC9     | 5.74 | 6.12 | 5.47 |
| LCMT1      | 5.74 | 6.28 | 5.01 |
| USPL1      | 5.74 | 6.12 | 5.32 |
| FOSL1      | 5.74 | 6.55 | 5.16 |
| DDR1       | 5.74 | 5.98 | 5.39 |
| CX3CL1     | 5.73 | 6.16 | 5.38 |
| DMRTC2     | 5.73 | 6.30 | 5.35 |
| RPL23AP53  | 5.73 | 6.76 | 4.89 |
| ALG14      | 5.73 | 6.24 | 4.83 |
| GRHPR      | 5.73 | 6.01 | 5.24 |
| GSS        | 5.73 | 6.08 | 5.48 |
| TCTN3      | 5.73 | 6.41 | 5.27 |
| RBM10      | 5.73 | 5.96 | 5.46 |
| POLG       | 5.73 | 5.98 | 5.29 |
| PCOLCE-AS1 | 5.73 | 6.24 | 5.43 |
| KIAA1429   | 5.73 | 6.20 | 5.28 |
| CNTFR-AS1  | 5.73 | 6.37 | 5.13 |
| TIMM17A    | 5.73 | 6.16 | 5.23 |
| ARHGAP24   | 5.73 | 6.05 | 5.46 |
| MRPS23     | 5.73 | 6.42 | 5.18 |
| SBF2-AS1   | 5.73 | 6.11 | 5.31 |
| USP10      | 5.73 | 6.11 | 5.00 |
| MDN1       | 5.73 | 5.93 | 5.29 |
| ADCY4      | 5.73 | 6.27 | 5.01 |
| CLIC2      | 5.73 | 6.69 | 4.96 |
| DCTN2      | 5.73 | 6.38 | 5.22 |
| DDIT4L     | 5.73 | 6.63 | 5.15 |
| MTRF1L     | 5.73 | 6.19 | 5.23 |
| TBC1D19    | 5.73 | 6.11 | 5.16 |
| FAM199X    | 5.73 | 6.03 | 5.44 |
| SCRN2      | 5.73 | 6.12 | 5.34 |
| CASP3      | 5.73 | 6.63 | 5.03 |
| MTRNR2L3   | 5.73 | 6.24 | 5.30 |
| MYO19      | 5.73 | 6.05 | 5.41 |
| SART1      | 5.73 | 5.86 | 5.55 |
| TDP2       | 5.73 | 6.18 | 5.06 |
| KIAA0947   | 5.73 | 6.49 | 4.83 |
| NUP205     | 5.73 | 5.98 | 5.15 |
| HOXA-AS4   | 5.73 | 5.92 | 5.52 |
| ARMC1      | 5.73 | 6.17 | 5.06 |
| MBD5       | 5.73 | 6.16 | 5.37 |
| RBMX2      | 5.73 | 6.04 | 5.05 |
| PAFAH2     | 5.73 | 6.05 | 5.38 |
| NEDD4      | 5.73 | 6.06 | 5.03 |
| AVPI1      | 5.73 | 6.08 | 5.37 |
| FLJ44635   | 5.73 | 6.04 | 5.23 |
| GOLGA6L2   | 5.73 | 6.37 | 5.13 |
| RABL2A     | 5.73 | 6.19 | 5.05 |

|                    |      |      |      |
|--------------------|------|------|------|
| PLCB3              | 5.73 | 6.16 | 5.33 |
| LSP1               | 5.73 | 6.08 | 5.33 |
| BMP6               | 5.73 | 6.37 | 4.86 |
| MIR24-2            | 5.73 | 6.37 | 5.19 |
| DHX33              | 5.73 | 6.07 | 5.06 |
| BBS1               | 5.73 | 6.05 | 5.58 |
| ZFYVE1             | 5.73 | 6.15 | 5.51 |
| OTTHUMG00000018028 | 5.73 | 6.10 | 4.79 |
| LOC646670          | 5.73 | 5.96 | 5.54 |
| TAPT1-AS1          | 5.73 | 5.92 | 5.53 |
| ST7                | 5.73 | 6.01 | 5.29 |
| PNMA5              | 5.73 | 6.14 | 5.25 |
| OTTHUMG00000171410 | 5.73 | 6.27 | 5.32 |
| CLIP3              | 5.73 | 6.17 | 5.17 |
| TMEM168            | 5.73 | 6.08 | 5.25 |
| DBR1               | 5.73 | 6.23 | 5.30 |
| OTTHUMG00000168751 | 5.73 | 6.35 | 4.55 |
| NID1               | 5.73 | 6.42 | 5.09 |
| HSCB               | 5.73 | 6.31 | 5.19 |
| YIF1A              | 5.72 | 6.12 | 5.16 |
| ARHGAP42           | 5.72 | 6.25 | 5.20 |
| NRBP2              | 5.72 | 6.14 | 5.26 |
| C2orf48            | 5.72 | 6.16 | 5.20 |
| BNC2               | 5.72 | 7.09 | 4.71 |
| KIAA1191           | 5.72 | 6.28 | 4.72 |
| EIF4ENIF1          | 5.72 | 5.95 | 4.95 |
| SNORA12            | 5.72 | 7.90 | 4.36 |
| TSSK3              | 5.72 | 6.20 | 5.17 |
| ARHGAP18           | 5.72 | 6.50 | 4.86 |
| TRABD              | 5.72 | 6.14 | 5.54 |
| FLCN               | 5.72 | 5.92 | 5.46 |
| AHDC1              | 5.72 | 6.02 | 5.54 |
| LCMT2              | 5.72 | 6.03 | 5.38 |
| MIR375             | 5.72 | 5.91 | 5.44 |
| CCNDBP1            | 5.72 | 6.04 | 4.93 |
| OR4C12             | 5.72 | 6.62 | 5.14 |
| ZAK                | 5.72 | 6.07 | 5.29 |
| FHL1               | 5.72 | 5.99 | 5.10 |
| USP41              | 5.72 | 6.76 | 5.03 |
| NBR2               | 5.72 | 5.99 | 5.04 |
| DLAT               | 5.72 | 6.06 | 5.07 |
| RBM7               | 5.72 | 6.27 | 5.14 |
| FOXD1              | 5.72 | 6.29 | 5.13 |
| TARSL2             | 5.72 | 6.13 | 5.21 |
| SNORD115-11        | 5.72 | 6.80 | 4.53 |
| SNORD115-12        | 5.72 | 6.80 | 4.53 |
| PDAP1              | 5.72 | 6.09 | 5.08 |
| CA12               | 5.72 | 6.67 | 5.23 |
| MET                | 5.72 | 6.26 | 5.09 |

|                    |      |      |      |
|--------------------|------|------|------|
| RRAGB              | 5.72 | 6.11 | 5.31 |
| NOTCH4             | 5.72 | 6.15 | 5.25 |
| OTTHUMG00000165331 | 5.72 | 6.50 | 5.14 |
| MRPL51             | 5.72 | 6.23 | 5.11 |
| APAF1              | 5.72 | 6.21 | 5.26 |
| JMJD8              | 5.72 | 6.02 | 5.25 |
| IDH3B              | 5.72 | 6.33 | 5.03 |
| PLIN2              | 5.72 | 6.47 | 5.06 |
| SLC7A8             | 5.72 | 6.35 | 5.11 |
| ILKAP              | 5.72 | 6.21 | 4.91 |
| CLK2               | 5.72 | 6.11 | 5.47 |
| DUSP14             | 5.72 | 6.13 | 5.37 |
| IGHG4              | 5.72 | 7.15 | 5.33 |
| VAT1               | 5.72 | 6.27 | 4.96 |
| LY6E               | 5.72 | 6.02 | 5.15 |
| PSMB10             | 5.72 | 6.16 | 5.42 |
| CDK19              | 5.72 | 6.27 | 5.10 |
| DPM3               | 5.72 | 6.25 | 5.16 |
| CBY1               | 5.72 | 6.01 | 5.51 |
| CBLN3              | 5.72 | 6.27 | 5.46 |
| RAB11FIP3          | 5.72 | 6.03 | 5.37 |
| OTTHUMG00000155475 | 5.72 | 6.10 | 5.40 |
| RBM42              | 5.72 | 6.00 | 5.26 |
| KLHL18             | 5.72 | 5.87 | 5.51 |
| ALDH2              | 5.72 | 6.30 | 5.19 |
| NEK6               | 5.72 | 6.01 | 5.38 |
| PRKAA1             | 5.72 | 5.99 | 5.26 |
| KIAA1755           | 5.72 | 6.07 | 5.50 |
| PRPS2              | 5.72 | 6.06 | 5.06 |
| FAM185A            | 5.72 | 6.01 | 5.42 |
| FNDC4              | 5.72 | 6.21 | 5.19 |
| SMAD1              | 5.72 | 6.04 | 5.46 |
| UBE2A              | 5.72 | 6.42 | 4.99 |
| PHF11              | 5.72 | 6.11 | 5.34 |
| LOC100192426       | 5.72 | 6.17 | 5.40 |
| RNF19A             | 5.72 | 6.17 | 5.18 |
| PHKA2-AS1          | 5.72 | 6.08 | 5.20 |
| FAS                | 5.71 | 6.12 | 5.15 |
| OR4C46             | 5.71 | 6.44 | 5.19 |
| PP7080             | 5.71 | 5.97 | 5.19 |
| ELMO2              | 5.71 | 6.13 | 5.32 |
| ZMYM1              | 5.71 | 5.98 | 5.34 |
| TXNL4B             | 5.71 | 6.09 | 5.19 |
| MIR1226            | 5.71 | 6.50 | 4.59 |
| TBCD               | 5.71 | 5.91 | 5.39 |
| CCL5               | 5.71 | 6.23 | 5.34 |
| C2CD3              | 5.71 | 5.93 | 5.35 |
| TMSB4X             | 5.71 | 6.11 | 4.98 |
| EHMT1              | 5.71 | 5.90 | 5.39 |

|                    |      |      |      |
|--------------------|------|------|------|
| RBSG2              | 5.71 | 6.29 | 5.45 |
| PRPS1              | 5.71 | 6.38 | 5.08 |
| ZNF117             | 5.71 | 6.25 | 4.75 |
| LOC100507367       | 5.71 | 6.08 | 5.35 |
| PEX19              | 5.71 | 5.97 | 5.30 |
| CRB2               | 5.71 | 6.41 | 5.29 |
| SQSTM1             | 5.71 | 6.04 | 5.31 |
| ARL5A              | 5.71 | 6.01 | 5.31 |
| ZNF783             | 5.71 | 6.33 | 5.36 |
| OTTHUMG00000155433 | 5.71 | 6.50 | 5.08 |
| LOC643669          | 5.71 | 6.09 | 5.18 |
| ELOVL4             | 5.71 | 6.34 | 4.83 |
| MIR4468            | 5.71 | 6.16 | 5.17 |
| PDIA3P             | 5.71 | 6.12 | 5.28 |
| ACOT8              | 5.71 | 6.04 | 5.14 |
| RNA5SP55           | 5.71 | 6.15 | 5.22 |
| C3orf70            | 5.71 | 6.49 | 4.74 |
| SLC35G3            | 5.71 | 6.32 | 5.11 |
| MED24              | 5.71 | 5.85 | 5.39 |
| SNORA11B           | 5.71 | 6.19 | 5.24 |
| GNPNAT1            | 5.71 | 6.75 | 4.63 |
| MAN2B1             | 5.71 | 6.18 | 5.19 |
| ABL2               | 5.71 | 6.39 | 4.99 |
| TRAF3IP2-AS1       | 5.71 | 6.11 | 5.18 |
| KCNQ5-AS2          | 5.71 | 6.78 | 4.89 |
| IGSF6              | 5.71 | 6.72 | 5.23 |
| SORBS1             | 5.71 | 6.54 | 5.15 |
| EVPL               | 5.71 | 6.18 | 5.47 |
| TAF4               | 5.71 | 5.84 | 5.55 |
| CSGALNACT1         | 5.71 | 6.03 | 5.14 |
| ALG9               | 5.71 | 6.28 | 5.15 |
| ADAMTSL2           | 5.71 | 5.99 | 5.37 |
| GTF2E2             | 5.71 | 6.28 | 5.26 |
| NEK9               | 5.71 | 6.14 | 5.17 |
| RAET1G             | 5.71 | 6.36 | 5.32 |
| DBNDD2             | 5.71 | 5.91 | 5.53 |
| CPQ                | 5.71 | 6.21 | 5.21 |
| VPS37B             | 5.71 | 6.11 | 5.32 |
| GSC                | 5.71 | 6.46 | 4.89 |
| IRF3               | 5.71 | 5.99 | 5.40 |
| MAP1S              | 5.71 | 6.28 | 5.34 |
| PINK1              | 5.71 | 6.22 | 5.16 |
| SNORD51            | 5.71 | 6.46 | 5.21 |
| LOC100506518       | 5.71 | 6.43 | 5.43 |
| OTTHUMG00000032803 | 5.71 | 6.19 | 5.15 |
| CCDC43             | 5.71 | 6.25 | 5.31 |
| TMEM69             | 5.71 | 6.19 | 5.17 |
| SLC25A4            | 5.71 | 6.15 | 5.09 |
| GAREML             | 5.71 | 6.24 | 5.37 |

|              |      |      |      |
|--------------|------|------|------|
| ZACN         | 5.71 | 5.98 | 5.53 |
| CCDC71L      | 5.71 | 6.11 | 5.17 |
| ZC3H12A      | 5.71 | 5.96 | 5.55 |
| SNORD7       | 5.71 | 6.35 | 4.92 |
| SLX4IP       | 5.71 | 5.89 | 5.44 |
| MVP          | 5.71 | 6.30 | 5.03 |
| OAS1         | 5.71 | 6.52 | 5.01 |
| STS          | 5.71 | 6.24 | 5.21 |
| ADSSL1       | 5.71 | 6.42 | 5.19 |
| RNA5-8SP6    | 5.71 | 6.41 | 5.17 |
| MIR100HG     | 5.71 | 6.14 | 5.16 |
| POU6F1       | 5.71 | 6.09 | 5.44 |
| PPIL2        | 5.71 | 5.93 | 5.47 |
| CDH5         | 5.71 | 6.65 | 4.41 |
| MYLPF        | 5.71 | 5.84 | 5.40 |
| CCDC167      | 5.70 | 6.29 | 4.99 |
| SPRTN        | 5.70 | 6.10 | 5.22 |
| SLC24A6      | 5.70 | 6.17 | 5.12 |
| COX11        | 5.70 | 5.95 | 5.43 |
| FAM150B      | 5.70 | 6.38 | 5.40 |
| COL13A1      | 5.70 | 6.11 | 5.31 |
| RNA5SP139    | 5.70 | 6.26 | 4.94 |
| LOC645166    | 5.70 | 6.22 | 5.03 |
| HSD17B11     | 5.70 | 6.26 | 4.76 |
| SNORD6       | 5.70 | 6.21 | 4.79 |
| MBD3L5       | 5.70 | 6.37 | 5.34 |
| FOXD4        | 5.70 | 6.03 | 5.17 |
| TCFL5        | 5.70 | 5.90 | 5.34 |
| ATG13        | 5.70 | 5.99 | 5.46 |
| STIP1        | 5.70 | 6.45 | 5.29 |
| EIF4E1B      | 5.70 | 6.24 | 5.35 |
| WDFY2        | 5.70 | 5.95 | 5.38 |
| MUC16        | 5.70 | 6.17 | 5.22 |
| DDX21        | 5.70 | 6.55 | 5.05 |
| PI4KB        | 5.70 | 6.14 | 5.27 |
| CCRN4L       | 5.70 | 6.13 | 5.02 |
| FAM160A2     | 5.70 | 5.92 | 5.37 |
| LACTB        | 5.70 | 6.47 | 4.96 |
| BIRC7        | 5.70 | 6.24 | 5.06 |
| FBXL2        | 5.70 | 6.12 | 5.38 |
| MANF         | 5.70 | 6.07 | 5.35 |
| MAMDC2-AS1   | 5.70 | 6.42 | 4.65 |
| FAM111A      | 5.70 | 6.23 | 5.15 |
| SNORD114-15  | 5.70 | 7.40 | 4.39 |
| ZNF33A       | 5.70 | 6.05 | 5.27 |
| FBXL7        | 5.70 | 6.16 | 5.08 |
| RNA5SP59     | 5.70 | 6.50 | 5.13 |
| BAG1         | 5.70 | 6.05 | 4.93 |
| LOC100128751 | 5.70 | 6.09 | 5.05 |

|                     |      |      |      |
|---------------------|------|------|------|
| OTTHUMG00000018660  | 5.70 | 6.18 | 5.26 |
| FAM104A             | 5.70 | 6.03 | 5.19 |
| TRMT5               | 5.70 | 6.39 | 5.15 |
| CD99L2              | 5.70 | 5.95 | 5.11 |
| GSTM2               | 5.70 | 6.06 | 5.45 |
| COG3                | 5.70 | 6.10 | 5.10 |
| PPP6R1              | 5.70 | 5.94 | 5.39 |
| ST5                 | 5.70 | 5.93 | 5.34 |
| MSRB3               | 5.70 | 6.18 | 5.31 |
| RNF26               | 5.70 | 6.07 | 5.20 |
| ARHGAP28            | 5.70 | 6.36 | 5.01 |
| ITPKB-IT1           | 5.70 | 5.93 | 5.26 |
| NTRK2               | 5.70 | 6.17 | 5.18 |
| OTTHUMG000000152764 | 5.70 | 6.39 | 5.12 |
| BAMBI               | 5.70 | 6.48 | 5.17 |
| TRIM23              | 5.70 | 6.10 | 5.07 |
| SH3GLB2             | 5.70 | 5.85 | 5.53 |
| SMCR7               | 5.70 | 5.96 | 5.30 |
| ZSCAN9              | 5.70 | 6.05 | 5.33 |
| ZFP90               | 5.70 | 6.32 | 5.30 |
| C6ORF205            | 5.70 | 6.43 | 4.94 |
| PTH1R               | 5.70 | 6.20 | 5.33 |
| KIR2DL1             | 5.70 | 6.48 | 5.25 |
| KCNQ10T1            | 5.70 | 6.11 | 5.22 |
| BAG3                | 5.70 | 6.13 | 5.03 |
| ATF5                | 5.70 | 6.08 | 5.33 |
| CEP97               | 5.70 | 6.11 | 5.16 |
| FAM213A             | 5.69 | 6.30 | 5.02 |
| EGFL7               | 5.69 | 5.90 | 5.43 |
| CAPG                | 5.69 | 6.20 | 5.03 |
| MAF1                | 5.69 | 6.06 | 5.18 |
| AGPAT6              | 5.69 | 6.01 | 5.23 |
| EIF2B4              | 5.69 | 5.93 | 5.38 |
| KIR3DL3             | 5.69 | 6.38 | 5.00 |
| NUDT9               | 5.69 | 6.17 | 5.36 |
| MZB1                | 5.69 | 5.99 | 5.06 |
| TRAJ39              | 5.69 | 6.35 | 5.28 |
| NEU1                | 5.69 | 5.90 | 5.45 |
| C5AR1               | 5.69 | 6.29 | 4.92 |
| ELMO1               | 5.69 | 6.18 | 5.19 |
| SFT2D1              | 5.69 | 6.34 | 5.20 |
| TFDP1               | 5.69 | 6.03 | 5.21 |
| SOCS3               | 5.69 | 6.47 | 4.99 |
| ZNF451              | 5.69 | 5.98 | 5.26 |
| PARP3               | 5.69 | 5.92 | 5.27 |
| PNPLA6              | 5.69 | 6.11 | 4.86 |
| EHMT2               | 5.69 | 5.98 | 5.48 |
| COG4                | 5.69 | 6.02 | 5.34 |
| SNUPN               | 5.69 | 6.03 | 5.13 |

|                    |      |      |      |
|--------------------|------|------|------|
| PPP2R1B            | 5.69 | 6.08 | 5.32 |
| ORC2               | 5.69 | 6.11 | 5.09 |
| MOGS               | 5.69 | 6.07 | 5.40 |
| CLEC18A            | 5.69 | 6.60 | 5.01 |
| STON1-GTF2A1L      | 5.69 | 6.18 | 5.41 |
| ISG20L2            | 5.69 | 6.21 | 4.99 |
| ZNF460             | 5.69 | 6.34 | 5.17 |
| DOPEY1             | 5.69 | 5.91 | 5.13 |
| PRAMEF15           | 5.69 | 6.78 | 5.17 |
| SNRNP40            | 5.69 | 6.18 | 5.36 |
| DYNC1I1            | 5.69 | 6.53 | 4.42 |
| CYP27A1            | 5.69 | 6.10 | 5.13 |
| SETDB1             | 5.69 | 6.02 | 4.99 |
| TTYH1              | 5.69 | 6.33 | 5.38 |
| IFNGR1             | 5.69 | 6.02 | 5.15 |
| SMG6               | 5.69 | 5.94 | 5.44 |
| TMEM63B            | 5.69 | 6.29 | 5.13 |
| RABL5              | 5.69 | 5.89 | 5.02 |
| CTHRC1             | 5.69 | 6.59 | 4.76 |
| DHRS7B             | 5.69 | 6.01 | 5.17 |
| C16orf54           | 5.69 | 6.03 | 5.42 |
| AGER               | 5.69 | 5.99 | 5.43 |
| PLGLB1             | 5.69 | 6.32 | 4.53 |
| RAPGEF6            | 5.69 | 6.06 | 5.19 |
| PTOV1              | 5.69 | 6.11 | 5.32 |
| OTTHUMG00000150015 | 5.69 | 6.16 | 4.92 |
| GNL3L              | 5.69 | 5.94 | 5.42 |
| FAM153B            | 5.69 | 6.22 | 5.09 |
| NPLOC4             | 5.69 | 6.22 | 5.22 |
| MIR370             | 5.69 | 6.39 | 4.89 |
| ATP7A              | 5.69 | 6.18 | 5.23 |
| ABRACL             | 5.69 | 6.39 | 4.80 |
| GAS1               | 5.68 | 6.02 | 5.12 |
| C14orf119          | 5.68 | 6.01 | 5.27 |
| JMJD6              | 5.68 | 6.10 | 5.28 |
| PTAR1              | 5.68 | 6.13 | 5.01 |
| TNIP2              | 5.68 | 5.98 | 5.30 |
| COMMD1             | 5.68 | 5.97 | 4.99 |
| LMO7               | 5.68 | 6.07 | 5.07 |
| SNX19              | 5.68 | 6.18 | 5.24 |
| BRD4               | 5.68 | 5.98 | 5.15 |
| PLEKH02            | 5.68 | 6.18 | 5.31 |
| DIS3L              | 5.68 | 6.02 | 5.21 |
| OTTHUMG00000059263 | 5.68 | 5.98 | 5.28 |
| WDR5B              | 5.68 | 6.10 | 5.13 |
| AP3D1              | 5.68 | 5.90 | 5.53 |
| SNORA21            | 5.68 | 6.14 | 5.14 |
| PAPOLG             | 5.68 | 6.01 | 5.29 |
| PTGS1              | 5.68 | 6.00 | 5.24 |

|              |      |      |      |
|--------------|------|------|------|
| LOC100288160 | 5.68 | 6.10 | 5.38 |
| WDR20        | 5.68 | 6.30 | 5.09 |
| SPRY4        | 5.68 | 6.24 | 5.19 |
| FAM25G       | 5.68 | 6.26 | 5.16 |
| STX17        | 5.68 | 6.12 | 5.27 |
| BAIAP2L1     | 5.68 | 6.61 | 5.17 |
| PRR3         | 5.68 | 6.03 | 5.22 |
| CCDC28B      | 5.68 | 6.20 | 5.25 |
| RWDD3        | 5.68 | 5.83 | 5.37 |
| NBPF1        | 5.68 | 6.48 | 5.17 |
| LDLRAD4-AS1  | 5.68 | 5.89 | 5.32 |
| MUC21        | 5.68 | 6.10 | 5.35 |
| PAOX         | 5.68 | 5.98 | 5.37 |
| CPNE8        | 5.68 | 5.99 | 5.39 |
| CD86         | 5.68 | 6.76 | 4.80 |
| PPT2-EGFL8   | 5.68 | 5.94 | 5.53 |
| SPTLC3       | 5.68 | 6.23 | 5.10 |
| ZNF784       | 5.68 | 6.03 | 5.15 |
| FAM83E       | 5.68 | 6.11 | 5.38 |
| ABHD17A      | 5.68 | 6.31 | 5.09 |
| FRG1B        | 5.68 | 6.27 | 4.93 |
| COL4A2       | 5.68 | 6.25 | 5.38 |
| ERAP1        | 5.68 | 6.12 | 5.19 |
| PHLPP1       | 5.68 | 6.09 | 5.39 |
| CCT6P3       | 5.68 | 6.17 | 5.18 |
| SNORD114-1   | 5.68 | 7.14 | 3.46 |
| IGHV4-61     | 5.68 | 6.10 | 5.13 |
| ZNRF1        | 5.68 | 5.95 | 5.33 |
| RPL39        | 5.68 | 5.82 | 5.49 |
| DUSP2        | 5.68 | 6.10 | 5.27 |
| ASMTL        | 5.68 | 6.01 | 5.41 |
| LINC00489    | 5.68 | 6.04 | 5.32 |
| LOC100128818 | 5.68 | 5.99 | 5.19 |
| TUB          | 5.68 | 5.96 | 5.00 |
| RNA5SP194    | 5.68 | 6.35 | 5.22 |
| MDFI         | 5.68 | 6.67 | 5.17 |
| CASP4        | 5.68 | 6.09 | 5.18 |
| TRAPPC10     | 5.68 | 6.01 | 5.13 |
| LOC100505828 | 5.68 | 6.22 | 5.34 |
| MIR720       | 5.68 | 6.14 | 5.45 |
| TMEM105      | 5.68 | 6.20 | 5.32 |
| TYW5         | 5.68 | 6.21 | 5.14 |
| CNPY4        | 5.68 | 6.10 | 5.13 |
| COQ10B       | 5.68 | 6.22 | 4.99 |
| HAT1         | 5.68 | 6.14 | 5.06 |
| OPN1SW       | 5.68 | 6.30 | 4.74 |
| ZDHHC18      | 5.68 | 5.99 | 5.17 |
| SEMA3A       | 5.68 | 7.26 | 4.57 |
| EPC1         | 5.68 | 6.03 | 5.25 |



|                    |      |      |      |
|--------------------|------|------|------|
| CD300C             | 5.68 | 5.98 | 5.35 |
| DKK3               | 5.68 | 6.23 | 4.98 |
| PLAU               | 5.68 | 6.82 | 5.06 |
| ZMAT2              | 5.68 | 5.88 | 5.54 |
| CCDC102B           | 5.68 | 6.82 | 4.19 |
| KDR                | 5.67 | 7.13 | 4.39 |
| CCDC92             | 5.67 | 5.94 | 5.39 |
| CCNG2              | 5.67 | 5.98 | 5.11 |
| LGI4               | 5.67 | 6.24 | 4.97 |
| GNB3               | 5.67 | 5.92 | 5.38 |
| ALDH1L2            | 5.67 | 6.79 | 4.82 |
| LOC642633          | 5.67 | 6.22 | 5.34 |
| MIR497HG           | 5.67 | 6.62 | 4.88 |
| SLC35A4            | 5.67 | 6.16 | 5.07 |
| RUNX1-IT1          | 5.67 | 7.24 | 4.49 |
| NUPL2              | 5.67 | 5.98 | 5.28 |
| DNM2               | 5.67 | 5.87 | 5.40 |
| C5                 | 5.67 | 5.97 | 5.25 |
| ECI1               | 5.67 | 5.84 | 5.34 |
| DCTN4              | 5.67 | 6.01 | 4.79 |
| CNTLN              | 5.67 | 6.38 | 4.81 |
| OTTHUMG00000154884 | 5.67 | 6.17 | 5.16 |
| HHAT               | 5.67 | 6.34 | 4.68 |
| SPG21              | 5.67 | 6.11 | 5.13 |
| ICAM3              | 5.67 | 5.86 | 5.47 |
| TANC2              | 5.67 | 6.51 | 4.83 |
| ORMDL3             | 5.67 | 6.00 | 5.22 |
| SEPT7P2            | 5.67 | 6.35 | 5.14 |
| CNIH2              | 5.67 | 6.03 | 5.41 |
| LIX1L              | 5.67 | 6.62 | 4.68 |
| OTTHUMG00000073721 | 5.67 | 6.14 | 5.17 |
| BLOC1S5            | 5.67 | 6.18 | 4.76 |
| HMG20A             | 5.67 | 5.89 | 5.49 |
| POLR1A             | 5.67 | 5.89 | 5.45 |
| CACTIN-AS1         | 5.67 | 5.95 | 5.39 |
| ZBTB11             | 5.67 | 6.06 | 5.21 |
| CCNY               | 5.67 | 6.29 | 4.96 |
| VPS41              | 5.67 | 6.07 | 5.30 |
| FAM229B            | 5.67 | 6.15 | 5.27 |
| C19orf55           | 5.67 | 5.83 | 5.57 |
| OTTHUMG00000001770 | 5.67 | 6.20 | 5.20 |
| KIAA1841           | 5.67 | 5.98 | 5.09 |
| SPRYD3             | 5.67 | 5.97 | 5.23 |
| FADS1              | 5.67 | 5.93 | 5.30 |
| TWISTNB            | 5.67 | 6.48 | 4.88 |
| IGHD2-15           | 5.67 | 6.48 | 5.03 |
| PPFIBP2            | 5.67 | 6.09 | 5.31 |
| SIRT1              | 5.67 | 6.01 | 4.70 |
| SCO1               | 5.67 | 5.96 | 5.07 |

|                    |      |      |      |
|--------------------|------|------|------|
| HLA-DOA            | 5.67 | 6.01 | 5.33 |
| MST1               | 5.67 | 6.19 | 5.32 |
| FBXO18             | 5.67 | 6.09 | 5.31 |
| MNT                | 5.67 | 5.93 | 5.34 |
| OTTHUMG00000171661 | 5.67 | 6.32 | 5.00 |
| HNRNPA0            | 5.67 | 6.11 | 5.22 |
| ATAD3A             | 5.67 | 6.12 | 5.04 |
| ANKRD40            | 5.67 | 6.02 | 5.17 |
| ZNF469             | 5.67 | 6.05 | 5.25 |
| PPA2               | 5.67 | 6.01 | 5.17 |
| ATP10A             | 5.67 | 6.76 | 4.97 |
| PHYHD1             | 5.67 | 6.05 | 5.28 |
| ERBB2              | 5.67 | 5.87 | 5.18 |
| C5orf60            | 5.66 | 6.64 | 5.02 |
| PORCN              | 5.66 | 5.85 | 5.30 |
| C21orf128          | 5.66 | 6.27 | 5.34 |
| ABHD13             | 5.66 | 6.12 | 5.07 |
| CA5BP1             | 5.66 | 6.03 | 5.36 |
| OTTHUMG00000171876 | 5.66 | 6.49 | 5.29 |
| RPL15              | 5.66 | 5.78 | 5.54 |
| SMPD1              | 5.66 | 5.95 | 5.31 |
| ZDHHC20            | 5.66 | 6.17 | 5.10 |
| DPF2               | 5.66 | 5.95 | 5.28 |
| C19orf80           | 5.66 | 5.99 | 5.30 |
| IRAK3              | 5.66 | 6.11 | 5.11 |
| LOC101060680       | 5.66 | 6.09 | 5.07 |
| PHF14              | 5.66 | 6.05 | 4.97 |
| LOC339505          | 5.66 | 6.15 | 5.16 |
| SP110              | 5.66 | 6.01 | 5.33 |
| ZNF785             | 5.66 | 5.89 | 5.51 |
| ANO1               | 5.66 | 6.46 | 4.81 |
| SFRP1              | 5.66 | 6.53 | 4.85 |
| KIAA1967           | 5.66 | 6.02 | 5.23 |
| WDR52              | 5.66 | 6.01 | 5.39 |
| CLTB               | 5.66 | 6.18 | 5.32 |
| TMEM80             | 5.66 | 5.95 | 5.40 |
| LAP3               | 5.66 | 6.02 | 5.22 |
| P2RY6              | 5.66 | 5.98 | 5.49 |
| CWC15              | 5.66 | 6.12 | 5.26 |
| ZCCHC2             | 5.66 | 5.99 | 5.22 |
| ACVRL1             | 5.66 | 5.90 | 5.28 |
| MIR4297            | 5.66 | 6.54 | 4.88 |
| LOC100509205       | 5.66 | 5.82 | 5.47 |
| CCNG1              | 5.66 | 6.04 | 5.34 |
| C11orf58           | 5.66 | 5.88 | 5.12 |
| CSTF2T             | 5.66 | 6.10 | 5.08 |
| NACA2              | 5.66 | 5.99 | 5.24 |
| DEFT1P             | 5.66 | 6.03 | 5.37 |
| SURF1              | 5.66 | 6.03 | 5.23 |

|                           |      |      |      |
|---------------------------|------|------|------|
| <i>PRPF4</i>              | 5.66 | 6.10 | 5.23 |
| <i>SELPLG</i>             | 5.66 | 6.00 | 5.42 |
| <i>KRT18P54</i>           | 5.66 | 6.16 | 5.13 |
| <i>ARFGAP1</i>            | 5.66 | 6.12 | 5.27 |
| <i>PRUNE2</i>             | 5.66 | 6.32 | 4.53 |
| <i>STON2</i>              | 5.66 | 6.42 | 5.26 |
| <i>TET1</i>               | 5.66 | 6.08 | 4.93 |
| <i>CLPTM1L</i>            | 5.66 | 6.02 | 5.18 |
| <i>ZNF608</i>             | 5.66 | 6.09 | 5.12 |
| <i>IL3RA</i>              | 5.66 | 6.09 | 4.59 |
| <i>OTTHUMG00000167267</i> | 5.66 | 6.09 | 5.31 |
| <i>B3GALT4</i>            | 5.66 | 5.87 | 5.40 |
| <i>MPHOSPH6</i>           | 5.66 | 6.29 | 5.19 |
| <i>PIGA</i>               | 5.66 | 5.92 | 5.39 |
| <i>EIF3B</i>              | 5.66 | 6.13 | 5.22 |
| <i>MIEN1</i>              | 5.66 | 6.41 | 5.09 |
| <i>GJB2</i>               | 5.66 | 7.22 | 4.60 |
| <i>USP3-AS1</i>           | 5.66 | 5.99 | 5.26 |
| <i>IZUMO4</i>             | 5.66 | 6.12 | 5.32 |
| <i>EFS</i>                | 5.66 | 5.93 | 5.21 |
| <i>AIP</i>                | 5.66 | 5.96 | 5.33 |
| <i>DHX38</i>              | 5.66 | 6.19 | 4.98 |
| <i>MYLK</i>               | 5.66 | 5.98 | 5.25 |
| <i>MIR891A</i>            | 5.66 | 6.24 | 5.04 |
| <i>PVRIG</i>              | 5.66 | 5.94 | 5.10 |
| <i>OTTHUMG00000166785</i> | 5.65 | 6.21 | 5.00 |
| <i>LRRC37BP1</i>          | 5.65 | 6.24 | 5.05 |
| <i>TMEM184C</i>           | 5.65 | 6.11 | 4.92 |
| <i>ERF</i>                | 5.65 | 6.05 | 5.24 |
| <i>C7orf26</i>            | 5.65 | 5.99 | 5.33 |
| <i>TYSND1</i>             | 5.65 | 5.87 | 5.28 |
| <i>CDH23</i>              | 5.65 | 6.55 | 4.95 |
| <i>CCND3</i>              | 5.65 | 6.27 | 5.17 |
| <i>LOC79999</i>           | 5.65 | 6.03 | 5.12 |
| <i>MAD1L1</i>             | 5.65 | 5.81 | 5.49 |
| <i>SAP30L</i>             | 5.65 | 6.20 | 4.84 |
| <i>C1orf131</i>           | 5.65 | 6.18 | 5.42 |
| <i>CHPT1</i>              | 5.65 | 5.90 | 5.36 |
| <i>DBT</i>                | 5.65 | 6.05 | 5.34 |
| <i>PALLD</i>              | 5.65 | 6.40 | 5.03 |
| <i>MIR197</i>             | 5.65 | 6.31 | 4.65 |
| <i>WDR76</i>              | 5.65 | 6.21 | 5.16 |
| <i>SMYD2</i>              | 5.65 | 5.97 | 5.39 |
| <i>TNS3</i>               | 5.65 | 5.95 | 5.19 |
| <i>NAV2-AS1</i>           | 5.65 | 6.49 | 4.24 |
| <i>BRAT1</i>              | 5.65 | 5.84 | 5.38 |
| <i>AEN</i>                | 5.65 | 5.92 | 5.32 |
| <i>MIR4254</i>            | 5.65 | 6.07 | 5.24 |
| <i>GBA</i>                | 5.65 | 6.03 | 5.29 |

|              |      |      |      |
|--------------|------|------|------|
| LOC646214    | 5.65 | 6.02 | 5.04 |
| PCGF1        | 5.65 | 6.14 | 5.38 |
| GALNS        | 5.65 | 5.99 | 5.42 |
| NCF4         | 5.65 | 5.91 | 5.30 |
| TM6SF1       | 5.65 | 6.57 | 4.72 |
| KCNG2        | 5.65 | 6.06 | 5.29 |
| MGAT5        | 5.65 | 6.07 | 5.08 |
| TMEM14B      | 5.65 | 6.55 | 4.89 |
| PTPLB        | 5.65 | 6.00 | 5.15 |
| MRPL17       | 5.65 | 6.15 | 5.18 |
| VSTM2L       | 5.65 | 5.97 | 5.33 |
| GTF3C3       | 5.65 | 6.27 | 5.01 |
| TWF2         | 5.65 | 6.08 | 5.05 |
| RAD54L2      | 5.65 | 5.94 | 5.09 |
| ARHGAP26     | 5.65 | 6.08 | 5.03 |
| RASSF3       | 5.65 | 6.07 | 5.37 |
| PRPF31       | 5.65 | 6.02 | 5.39 |
| MCCD1        | 5.65 | 6.44 | 5.23 |
| HAS3         | 5.65 | 6.22 | 5.18 |
| RUNX1        | 5.65 | 6.11 | 5.16 |
| YARS         | 5.65 | 6.40 | 5.23 |
| ADAM20P1     | 5.65 | 5.97 | 5.24 |
| LOC100129233 | 5.65 | 6.09 | 5.46 |
| DCLRE1B      | 5.65 | 6.10 | 4.99 |
| C22orf26     | 5.65 | 6.03 | 5.22 |
| NSUN2        | 5.65 | 6.07 | 5.18 |
| SNORA84      | 5.65 | 5.97 | 5.37 |
| FGD4         | 5.65 | 5.95 | 5.07 |
| SP4          | 5.65 | 6.18 | 5.28 |
| CACNA1C-AS4  | 5.65 | 6.49 | 4.96 |
| TSPAN4       | 5.65 | 5.82 | 5.50 |
| RTTN         | 5.65 | 5.93 | 5.28 |
| MPRIIP       | 5.65 | 6.02 | 5.12 |
| CARD8        | 5.65 | 6.07 | 5.22 |
| ACAD9        | 5.65 | 6.13 | 5.14 |
| ZNF362       | 5.65 | 5.98 | 5.22 |
| CCT8         | 5.65 | 6.02 | 5.38 |
| LSM10        | 5.65 | 5.96 | 5.37 |
| MCCC1-AS1    | 5.65 | 6.06 | 5.29 |
| PIK3R3       | 5.65 | 6.19 | 4.96 |
| TNIP1        | 5.65 | 5.85 | 5.41 |
| FAM25A       | 5.64 | 6.17 | 5.12 |
| PI4KA        | 5.64 | 6.12 | 5.16 |
| DMPK         | 5.64 | 5.93 | 5.42 |
| MLF2         | 5.64 | 5.90 | 5.18 |
| ST6GAL1      | 5.64 | 5.98 | 4.97 |
| UQCRFS1      | 5.64 | 6.10 | 4.88 |
| ACOX1        | 5.64 | 5.93 | 4.93 |
| CCDC23       | 5.64 | 6.19 | 5.23 |

|                    |      |      |      |
|--------------------|------|------|------|
| PHOSPHO1           | 5.64 | 6.28 | 4.88 |
| RUVBL1             | 5.64 | 6.01 | 5.19 |
| SPATA5             | 5.64 | 6.32 | 5.01 |
| DDX19A             | 5.64 | 5.97 | 5.29 |
| ZNF593             | 5.64 | 6.03 | 5.22 |
| SMCR8              | 5.64 | 5.89 | 4.94 |
| LOC100996357       | 5.64 | 6.40 | 5.07 |
| FAM126B            | 5.64 | 6.00 | 5.23 |
| OTTHUMG00000163917 | 5.64 | 6.46 | 4.98 |
| SLC15A3            | 5.64 | 5.91 | 5.37 |
| COX10-AS1          | 5.64 | 6.03 | 5.03 |
| FOXD4L3            | 5.64 | 6.31 | 5.00 |
| MYH11              | 5.64 | 6.28 | 5.22 |
| PDK4               | 5.64 | 6.40 | 4.69 |
| SMAD6              | 5.64 | 6.23 | 4.83 |
| CREG1              | 5.64 | 5.97 | 5.07 |
| AZIN1              | 5.64 | 6.08 | 5.05 |
| MKKS               | 5.64 | 6.07 | 4.85 |
| METTL15            | 5.64 | 6.05 | 5.37 |
| ZNF37A             | 5.64 | 5.91 | 5.39 |
| INSIG1             | 5.64 | 6.07 | 5.31 |
| POLD3              | 5.64 | 5.84 | 5.34 |
| ATP6V1E1           | 5.64 | 5.97 | 5.11 |
| OR2A1              | 5.64 | 6.27 | 5.13 |
| RRP7A              | 5.64 | 6.08 | 5.25 |
| RUFY1              | 5.64 | 6.03 | 5.20 |
| MKX                | 5.64 | 6.37 | 5.11 |
| LOC338797          | 5.64 | 6.25 | 5.06 |
| THPO               | 5.64 | 6.02 | 5.33 |
| GON4L              | 5.64 | 5.88 | 5.25 |
| DDX26B             | 5.64 | 6.01 | 4.98 |
| KPNA1              | 5.64 | 5.95 | 5.01 |
| NDUFA10            | 5.64 | 6.05 | 5.03 |
| CCP110             | 5.64 | 6.37 | 4.98 |
| ALS2               | 5.64 | 5.91 | 5.21 |
| IL17RE             | 5.64 | 5.98 | 5.42 |
| ANKRD20A2          | 5.64 | 6.12 | 5.18 |
| INTS5              | 5.64 | 6.32 | 5.01 |
| DVL3               | 5.64 | 6.15 | 5.15 |
| TPSB2              | 5.64 | 6.13 | 5.31 |
| LOC100505710       | 5.64 | 6.11 | 5.23 |
| SYNM               | 5.64 | 6.09 | 5.27 |
| MGRN1              | 5.64 | 5.96 | 5.33 |
| SMEK2              | 5.64 | 6.19 | 5.07 |
| OTTHUMG00000041460 | 5.64 | 6.09 | 5.22 |
| OTTHUMG00000019603 | 5.64 | 6.19 | 5.24 |
| ERLIN2             | 5.64 | 5.92 | 5.43 |
| SUGP2              | 5.64 | 5.87 | 5.10 |
| MAGI2-AS1          | 5.64 | 6.22 | 4.98 |

|                    |      |      |      |
|--------------------|------|------|------|
| SLC26A11           | 5.64 | 5.87 | 5.24 |
| THOC1              | 5.64 | 6.08 | 5.20 |
| PIGN               | 5.64 | 6.35 | 5.15 |
| GALNT2             | 5.64 | 6.31 | 5.22 |
| ZNF490             | 5.64 | 5.81 | 5.37 |
| THOC6              | 5.64 | 5.89 | 5.35 |
| ZXDA               | 5.64 | 6.06 | 4.92 |
| MUC3A              | 5.64 | 6.58 | 4.92 |
| FAM174A            | 5.64 | 6.06 | 4.84 |
| OXNAD1             | 5.64 | 5.84 | 5.31 |
| ZBTB40             | 5.64 | 5.99 | 5.09 |
| RBM33              | 5.64 | 6.13 | 5.18 |
| ARFRP1             | 5.64 | 6.13 | 5.41 |
| TPTEP1             | 5.64 | 6.16 | 5.03 |
| EHBP1              | 5.64 | 6.05 | 5.12 |
| OTTHUMG00000045359 | 5.64 | 5.97 | 5.30 |
| DHDDS              | 5.63 | 5.88 | 5.32 |
| NDUFB4             | 5.63 | 6.02 | 5.13 |
| LOC255654          | 5.63 | 6.23 | 4.85 |
| NUBP1              | 5.63 | 6.19 | 4.83 |
| PSORS1C2           | 5.63 | 6.25 | 5.39 |
| TTI1               | 5.63 | 5.99 | 5.34 |
| ZNF226             | 5.63 | 6.05 | 5.20 |
| B3GALNT1           | 5.63 | 5.98 | 5.06 |
| SEC16A             | 5.63 | 5.96 | 5.21 |
| OGFOD2             | 5.63 | 5.80 | 5.47 |
| OTTHUMG00000013217 | 5.63 | 5.97 | 5.23 |
| SLC46A3            | 5.63 | 6.31 | 5.00 |
| MAGEA9             | 5.63 | 6.07 | 5.35 |
| NKX1-2             | 5.63 | 6.11 | 5.20 |
| DISP1              | 5.63 | 5.88 | 5.11 |
| GPRASP1            | 5.63 | 6.09 | 5.29 |
| RIOK2              | 5.63 | 6.13 | 5.26 |
| BOK                | 5.63 | 5.97 | 5.37 |
| ATP6V0B            | 5.63 | 5.97 | 5.32 |
| PLA2R1             | 5.63 | 6.50 | 4.64 |
| TEKT4              | 5.63 | 6.06 | 5.12 |
| STRA13             | 5.63 | 5.91 | 5.26 |
| EBAG9              | 5.63 | 5.96 | 5.11 |
| MXD4               | 5.63 | 5.96 | 5.29 |
| ALDH3B1            | 5.63 | 5.93 | 5.18 |
| MFI2               | 5.63 | 6.25 | 5.15 |
| LOC100133920       | 5.63 | 5.94 | 5.20 |
| B3GNT1             | 5.63 | 5.87 | 5.47 |
| HSD17B1            | 5.63 | 5.98 | 4.94 |
| P2RX5-TAX1BP3      | 5.63 | 5.92 | 5.41 |
| HYAL2              | 5.63 | 5.88 | 5.14 |
| DIP2B              | 5.63 | 6.13 | 5.25 |
| LOC100128077       | 5.63 | 5.90 | 5.44 |

|                    |      |      |      |
|--------------------|------|------|------|
| FLJ41733           | 5.63 | 5.91 | 5.21 |
| KGFLP2             | 5.63 | 6.17 | 4.72 |
| FRMD4B             | 5.63 | 6.28 | 4.89 |
| MYL7               | 5.63 | 5.84 | 5.41 |
| PQLC1              | 5.63 | 5.91 | 5.23 |
| MIR3934            | 5.63 | 6.12 | 5.16 |
| TINF2              | 5.63 | 6.03 | 4.97 |
| TCF7L1             | 5.63 | 6.00 | 5.22 |
| GCN1L1             | 5.63 | 6.02 | 5.19 |
| DCK                | 5.63 | 6.08 | 4.99 |
| MGC4294            | 5.63 | 6.23 | 5.10 |
| RNF34              | 5.63 | 6.11 | 5.09 |
| CNEP1R1            | 5.63 | 6.20 | 4.83 |
| SNORD23            | 5.63 | 6.11 | 5.10 |
| VWA5A              | 5.63 | 6.07 | 5.14 |
| PARD3              | 5.63 | 6.23 | 5.22 |
| PRAMEF5            | 5.63 | 6.08 | 5.13 |
| RNA5SP406          | 5.63 | 6.06 | 5.20 |
| RAB21              | 5.63 | 6.21 | 4.91 |
| DKC1               | 5.63 | 6.06 | 5.12 |
| LINC00910          | 5.63 | 5.97 | 5.14 |
| SYDE1              | 5.63 | 5.98 | 5.24 |
| MTF2               | 5.63 | 6.02 | 5.25 |
| HEXDC              | 5.63 | 5.99 | 5.13 |
| LRP12              | 5.63 | 6.66 | 4.85 |
| FAN1               | 5.63 | 6.35 | 5.01 |
| C19orf71           | 5.63 | 5.93 | 5.35 |
| CEP68              | 5.62 | 5.88 | 5.42 |
| BCKDK              | 5.62 | 5.90 | 5.42 |
| ARFIP2             | 5.62 | 5.89 | 4.85 |
| OTTHUMG00000180685 | 5.62 | 6.36 | 4.92 |
| CRYGC              | 5.62 | 6.06 | 5.19 |
| GSE1               | 5.62 | 6.03 | 5.12 |
| APITD1-CORT        | 5.62 | 5.94 | 5.40 |
| PNPLA2             | 5.62 | 5.90 | 5.35 |
| CSF2RA             | 5.62 | 5.95 | 5.28 |
| BCS1L              | 5.62 | 5.89 | 5.36 |
| OTTHUMG00000018330 | 5.62 | 6.71 | 4.23 |
| CEP120             | 5.62 | 6.00 | 5.12 |
| NACAD              | 5.62 | 6.03 | 4.88 |
| SHKBP1             | 5.62 | 5.78 | 5.33 |
| ITPR3              | 5.62 | 6.14 | 4.78 |
| KRTAP2-1           | 5.62 | 6.19 | 5.07 |
| TTC13              | 5.62 | 5.95 | 4.96 |
| LIMK2              | 5.62 | 5.90 | 5.34 |
| ABCF2              | 5.62 | 6.05 | 5.31 |
| ANKRD16            | 5.62 | 6.04 | 5.05 |
| PSMD3              | 5.62 | 5.97 | 5.28 |
| CKS2               | 5.62 | 6.68 | 4.38 |

|                    |      |      |      |
|--------------------|------|------|------|
| HBE1               | 5.62 | 6.13 | 5.11 |
| MIR3944            | 5.62 | 6.10 | 5.28 |
| UBE2V2             | 5.62 | 6.01 | 5.33 |
| S100A2             | 5.62 | 5.92 | 5.30 |
| OTTHUMG00000058631 | 5.62 | 6.39 | 5.09 |
| SMNDC1             | 5.62 | 5.98 | 5.23 |
| BMP8A              | 5.62 | 6.50 | 5.23 |
| C16orf58           | 5.62 | 5.90 | 5.01 |
| HSD17B7P2          | 5.62 | 5.98 | 5.08 |
| FAM210B            | 5.62 | 6.23 | 4.86 |
| SCOC               | 5.62 | 5.97 | 5.25 |
| OTTHUMG00000150793 | 5.62 | 6.32 | 4.92 |
| MEG8               | 5.62 | 6.89 | 4.81 |
| GORASP1            | 5.62 | 5.92 | 5.29 |
| MIR3918            | 5.62 | 5.95 | 5.03 |
| TTN-AS1            | 5.62 | 6.05 | 5.16 |
| MFSD6              | 5.62 | 5.86 | 5.26 |
| CSAG2              | 5.62 | 5.89 | 5.23 |
| OTTHUMG00000163201 | 5.62 | 5.96 | 5.11 |
| SSU72              | 5.62 | 5.98 | 5.16 |
| LRRN2              | 5.62 | 5.85 | 5.42 |
| OR5C1              | 5.62 | 5.95 | 5.41 |
| PDE4A              | 5.62 | 5.94 | 5.11 |
| KCTD20             | 5.62 | 6.07 | 5.08 |
| EDC3               | 5.62 | 6.22 | 5.01 |
| ARPC5L             | 5.62 | 5.95 | 5.17 |
| LOC388849          | 5.62 | 5.99 | 5.33 |
| MATN4              | 5.62 | 6.06 | 5.28 |
| TST                | 5.62 | 5.79 | 5.30 |
| OTTHUMG00000177158 | 5.62 | 5.98 | 5.10 |
| HSPA2              | 5.62 | 6.45 | 4.93 |
| OTTHUMG00000175726 | 5.62 | 6.23 | 5.22 |
| LRRC8E             | 5.62 | 6.44 | 4.98 |
| BRD8               | 5.62 | 5.91 | 5.39 |
| IRF2BPL            | 5.62 | 5.99 | 5.24 |
| GOLGA1             | 5.62 | 5.87 | 5.15 |
| ZNF746             | 5.62 | 5.92 | 5.36 |
| SPA17              | 5.62 | 5.91 | 4.99 |
| CDK18              | 5.62 | 6.20 | 5.18 |
| TMEM255B           | 5.62 | 5.87 | 5.31 |
| LOC100505616       | 5.62 | 5.96 | 5.26 |
| CD14               | 5.62 | 6.27 | 5.13 |
| ING2               | 5.62 | 6.14 | 4.89 |
| TCEB1              | 5.62 | 6.26 | 4.96 |
| SLC25A40           | 5.62 | 6.00 | 5.15 |
| INPP5K             | 5.62 | 5.79 | 5.46 |
| SYNJ1              | 5.62 | 6.03 | 4.77 |
| SLC35B4            | 5.62 | 6.35 | 4.50 |
| PSTK               | 5.62 | 5.97 | 5.34 |



|                    |      |      |      |
|--------------------|------|------|------|
| RHOT1              | 5.62 | 6.22 | 4.54 |
| LOC727710          | 5.62 | 6.17 | 5.09 |
| GPAA1              | 5.62 | 5.93 | 5.31 |
| PGRMC2             | 5.62 | 6.07 | 5.33 |
| KIAA1704           | 5.62 | 6.01 | 5.16 |
| NAV2               | 5.62 | 6.06 | 4.96 |
| CARS               | 5.61 | 6.15 | 4.82 |
| LOC100507463       | 5.61 | 6.06 | 5.23 |
| DOCK8              | 5.61 | 6.11 | 5.15 |
| NDE1               | 5.61 | 5.97 | 5.34 |
| ZNF436             | 5.61 | 6.41 | 4.52 |
| ZFAND2A            | 5.61 | 6.05 | 5.24 |
| CELA2A             | 5.61 | 6.22 | 5.29 |
| AP1B1              | 5.61 | 6.13 | 5.07 |
| DKFZP586I1420      | 5.61 | 6.24 | 5.05 |
| RAI14              | 5.61 | 6.65 | 4.87 |
| KPNA5              | 5.61 | 5.95 | 5.25 |
| F13A1              | 5.61 | 6.79 | 4.68 |
| NAT10              | 5.61 | 5.89 | 5.27 |
| RABGGTB            | 5.61 | 6.10 | 5.14 |
| HECW2              | 5.61 | 6.44 | 5.11 |
| CPSF1              | 5.61 | 6.05 | 5.13 |
| TMEM258            | 5.61 | 5.84 | 5.35 |
| SLC1A5             | 5.61 | 6.21 | 4.75 |
| RASL10B            | 5.61 | 6.12 | 5.25 |
| LOC286297          | 5.61 | 6.06 | 5.30 |
| SYTL4              | 5.61 | 6.13 | 4.90 |
| MYCBP2-AS1         | 5.61 | 5.89 | 5.32 |
| ULBP2              | 5.61 | 6.18 | 4.80 |
| MDH1               | 5.61 | 5.84 | 5.28 |
| NTMT1              | 5.61 | 6.11 | 5.27 |
| KIAA0907           | 5.61 | 5.79 | 5.24 |
| AASDH              | 5.61 | 5.81 | 5.13 |
| INTS2              | 5.61 | 6.06 | 5.10 |
| LOC401321          | 5.61 | 5.87 | 5.00 |
| SFRP2              | 5.61 | 6.97 | 4.68 |
| PACS1              | 5.61 | 6.00 | 5.17 |
| FAM86HP            | 5.61 | 6.03 | 4.99 |
| FAM225A            | 5.61 | 6.23 | 4.96 |
| HLA-V              | 5.61 | 5.87 | 5.31 |
| LOC554223          | 5.61 | 5.87 | 5.31 |
| BMP2               | 5.61 | 6.25 | 4.87 |
| VPS37A             | 5.61 | 6.17 | 5.01 |
| C20orf166-AS1      | 5.61 | 6.18 | 5.11 |
| OTTHUMG00000180722 | 5.61 | 6.02 | 5.34 |
| C15orf65           | 5.61 | 6.32 | 4.89 |
| C9orf50            | 5.61 | 5.80 | 5.41 |
| ITM2C              | 5.61 | 6.29 | 5.21 |
| C1RL               | 5.61 | 6.03 | 5.34 |

|              |      |      |      |
|--------------|------|------|------|
| HOXB-AS4     | 5.61 | 6.04 | 5.34 |
| LSR          | 5.61 | 5.99 | 5.10 |
| TSEN2        | 5.61 | 5.97 | 5.23 |
| TMEM130      | 5.61 | 6.14 | 5.29 |
| MIR4640      | 5.61 | 5.84 | 5.31 |
| P4HB         | 5.61 | 6.03 | 5.13 |
| HRH1         | 5.61 | 6.20 | 5.13 |
| MAML1        | 5.61 | 5.85 | 5.21 |
| PML          | 5.61 | 5.81 | 5.44 |
| SREK1IP1     | 5.61 | 5.93 | 5.18 |
| MIR4312      | 5.61 | 6.10 | 5.07 |
| HSF4         | 5.61 | 6.16 | 5.31 |
| RNF167       | 5.61 | 5.84 | 5.22 |
| HOXD4        | 5.61 | 6.06 | 5.12 |
| PER2         | 5.61 | 6.10 | 4.95 |
| MTX2         | 5.61 | 6.29 | 5.01 |
| ASB1         | 5.61 | 5.97 | 5.34 |
| SDK2         | 5.61 | 5.97 | 5.11 |
| AZI1         | 5.61 | 5.85 | 5.26 |
| LOC100132999 | 5.61 | 5.90 | 5.24 |
| GSDMD        | 5.61 | 5.94 | 5.25 |
| GAS6         | 5.61 | 6.19 | 4.81 |
| FAM87B       | 5.61 | 5.88 | 5.23 |
| CWC25        | 5.61 | 5.88 | 4.95 |
| IL18BP       | 5.61 | 5.94 | 5.33 |
| HPS5         | 5.61 | 5.84 | 5.39 |
| SAR1B        | 5.61 | 5.98 | 4.96 |
| TRNAU1AP     | 5.61 | 5.99 | 5.03 |
| EIF6         | 5.61 | 6.09 | 5.15 |
| NABP1        | 5.61 | 6.13 | 5.12 |
| LOC100505771 | 5.61 | 6.04 | 5.04 |
| FLNC         | 5.61 | 5.96 | 5.36 |
| ZFYVE9       | 5.61 | 5.82 | 5.13 |
| PSEN1        | 5.61 | 5.91 | 5.13 |
| PLEKHG2      | 5.61 | 5.85 | 5.04 |
| C3orf62      | 5.61 | 5.88 | 5.32 |
| ST7-OT4      | 5.61 | 5.91 | 5.17 |
| KLF9         | 5.61 | 6.41 | 4.71 |
| PCNXL2       | 5.60 | 5.85 | 5.28 |
| CNIH4        | 5.60 | 6.25 | 5.12 |
| SPDYE5       | 5.60 | 6.16 | 4.27 |
| LOC100288152 | 5.60 | 5.96 | 5.31 |
| RRN3P2       | 5.60 | 6.12 | 5.04 |
| SHOX2        | 5.60 | 5.87 | 5.12 |
| GPD1L        | 5.60 | 5.99 | 5.39 |
| UPK2         | 5.60 | 5.95 | 4.98 |
| TRAF6        | 5.60 | 5.88 | 5.31 |
| ZMYM3        | 5.60 | 5.99 | 5.13 |
| UBE2E3       | 5.60 | 5.92 | 4.78 |

|                    |      |      |      |
|--------------------|------|------|------|
| EMC1               | 5.60 | 5.85 | 5.15 |
| LSM4               | 5.60 | 5.97 | 5.17 |
| DUSP3              | 5.60 | 6.37 | 4.87 |
| LOC100507437       | 5.60 | 6.10 | 5.27 |
| TMBIM1             | 5.60 | 6.04 | 4.97 |
| HHIP               | 5.60 | 6.80 | 4.68 |
| ACTR8              | 5.60 | 5.93 | 4.85 |
| LUZP1              | 5.60 | 6.09 | 5.28 |
| KPNA4              | 5.60 | 6.17 | 4.94 |
| A4GALT             | 5.60 | 5.96 | 4.79 |
| TNFSF13B           | 5.60 | 6.17 | 5.29 |
| NUBP2              | 5.60 | 6.02 | 5.20 |
| MIR2113            | 5.60 | 6.03 | 5.37 |
| OTTHUMG00000171614 | 5.60 | 6.06 | 5.20 |
| FKBP8              | 5.60 | 5.89 | 5.00 |
| RBM22              | 5.60 | 5.90 | 5.28 |
| MFAP2              | 5.60 | 6.53 | 4.68 |
| DHRS4-AS1          | 5.60 | 5.85 | 5.37 |
| RCAN2              | 5.60 | 6.23 | 4.65 |
| UTY                | 5.60 | 6.69 | 3.48 |
| PLA2G12A           | 5.60 | 5.99 | 4.98 |
| LOC100128172       | 5.60 | 6.14 | 5.31 |
| HBEGF              | 5.60 | 6.18 | 4.55 |
| RNA5SP444          | 5.60 | 6.31 | 5.05 |
| PRRX2              | 5.60 | 6.04 | 5.26 |
| ADC                | 5.60 | 5.90 | 5.16 |
| MGC10955           | 5.60 | 6.20 | 5.06 |
| ETNK1              | 5.60 | 5.93 | 4.97 |
| SCNM1              | 5.60 | 6.01 | 5.22 |
| ALKBH6             | 5.60 | 5.96 | 5.32 |
| MAGI1              | 5.60 | 5.97 | 5.00 |
| ZNF813             | 5.60 | 6.18 | 4.99 |
| TMEM191B           | 5.60 | 6.09 | 5.33 |
| GPSM1              | 5.60 | 5.79 | 5.34 |
| ABHD12             | 5.60 | 6.31 | 4.92 |
| EDNRA              | 5.60 | 6.70 | 4.93 |
| PPP4C              | 5.60 | 6.13 | 4.67 |
| SLC26A2            | 5.60 | 5.88 | 5.02 |
| RPL30              | 5.60 | 5.80 | 5.36 |
| HR                 | 5.60 | 5.90 | 5.11 |
| MIER3              | 5.60 | 5.73 | 5.41 |
| PPHLN1             | 5.60 | 5.89 | 5.04 |
| OTTHUMG00000170889 | 5.60 | 6.37 | 4.68 |
| LPIN2              | 5.60 | 5.92 | 5.27 |
| FZD5               | 5.60 | 5.89 | 5.37 |
| INPP4A             | 5.60 | 5.90 | 5.12 |
| U2AF2              | 5.60 | 5.94 | 5.10 |
| C12orf10           | 5.60 | 6.01 | 5.08 |
| GABPB1-AS1         | 5.60 | 5.86 | 4.92 |

|                    |      |      |      |
|--------------------|------|------|------|
| COPE               | 5.60 | 5.92 | 5.00 |
| PSMG4              | 5.60 | 6.04 | 5.26 |
| CHRNE              | 5.60 | 6.01 | 5.26 |
| RPS19BP1           | 5.60 | 5.81 | 5.36 |
| FASTK              | 5.60 | 5.75 | 5.40 |
| TOX2               | 5.60 | 6.25 | 5.19 |
| H2AFV              | 5.60 | 6.06 | 4.76 |
| HMGCS1             | 5.60 | 6.14 | 5.07 |
| FGFR10P            | 5.60 | 6.01 | 5.14 |
| ZNF766             | 5.60 | 6.20 | 5.27 |
| INTS1              | 5.60 | 5.69 | 5.42 |
| CACYBP             | 5.60 | 5.88 | 5.02 |
| TMEM200A           | 5.60 | 6.43 | 5.09 |
| IL15RA             | 5.60 | 5.92 | 5.26 |
| THADA              | 5.59 | 5.82 | 5.27 |
| MIR3922            | 5.59 | 6.03 | 4.96 |
| FAM109B            | 5.59 | 6.05 | 5.35 |
| SSR4               | 5.59 | 5.86 | 5.40 |
| WDR1               | 5.59 | 5.95 | 5.17 |
| ATXN7L1            | 5.59 | 5.81 | 5.35 |
| SPATA25            | 5.59 | 6.15 | 5.13 |
| SYTL2              | 5.59 | 6.12 | 5.23 |
| KLK5               | 5.59 | 6.10 | 5.10 |
| KLHL29             | 5.59 | 5.95 | 4.91 |
| NKD1               | 5.59 | 5.93 | 5.31 |
| SIRT7              | 5.59 | 5.84 | 5.11 |
| HAND2              | 5.59 | 6.06 | 4.93 |
| OTTHUMG00000167197 | 5.59 | 5.99 | 5.06 |
| CBX1               | 5.59 | 5.88 | 5.29 |
| CCDC174            | 5.59 | 6.06 | 4.84 |
| UBXN2A             | 5.59 | 5.84 | 5.21 |
| OTTHUMG00000002202 | 5.59 | 6.04 | 5.08 |
| SUPV3L1            | 5.59 | 6.01 | 5.28 |
| GUK1               | 5.59 | 5.97 | 5.14 |
| ZNF256             | 5.59 | 5.91 | 4.87 |
| LRCH1              | 5.59 | 6.15 | 4.97 |
| TRAK1              | 5.59 | 5.83 | 5.36 |
| GATA1              | 5.59 | 5.95 | 5.15 |
| WDR44              | 5.59 | 6.01 | 4.79 |
| ZNF85              | 5.59 | 5.84 | 5.07 |
| CHTF18             | 5.59 | 5.83 | 5.31 |
| LOC338667          | 5.59 | 6.04 | 5.02 |
| WNT1               | 5.59 | 6.00 | 5.19 |
| GPATCH2L           | 5.59 | 6.22 | 4.93 |
| SLC4A3             | 5.59 | 5.94 | 5.24 |
| FAM134A            | 5.59 | 6.00 | 5.39 |
| LGALS9C            | 5.59 | 6.09 | 5.12 |
| C12orf73           | 5.59 | 6.02 | 4.78 |
| GUSBP4             | 5.59 | 5.83 | 5.09 |

|                    |      |      |      |
|--------------------|------|------|------|
| PID1               | 5.59 | 6.85 | 4.85 |
| GNRH2              | 5.59 | 6.07 | 5.24 |
| MRPS14             | 5.59 | 6.16 | 4.73 |
| MYEOV2             | 5.59 | 6.05 | 5.06 |
| SMN2               | 5.59 | 6.04 | 5.35 |
| ZC3H4              | 5.59 | 5.78 | 5.25 |
| HAUS4              | 5.59 | 5.81 | 5.41 |
| SGPP1              | 5.59 | 5.96 | 5.23 |
| POM121L8P          | 5.59 | 6.42 | 5.06 |
| OR2M7              | 5.59 | 6.95 | 4.85 |
| MNS1               | 5.59 | 6.06 | 5.13 |
| DPP7               | 5.59 | 6.06 | 5.03 |
| NUP37              | 5.59 | 6.26 | 4.80 |
| QARS               | 5.59 | 5.83 | 5.33 |
| ZNFX1              | 5.59 | 5.89 | 5.20 |
| PTGDR2             | 5.59 | 6.06 | 4.97 |
| TKT                | 5.59 | 5.95 | 5.33 |
| DDX56              | 5.59 | 5.99 | 5.12 |
| AURKB              | 5.59 | 6.09 | 4.81 |
| TUBA4A             | 5.59 | 5.98 | 5.29 |
| FAM63A             | 5.59 | 5.94 | 5.03 |
| SNORA15            | 5.59 | 6.08 | 5.33 |
| TOM1L2             | 5.59 | 5.78 | 5.28 |
| TOR3A              | 5.59 | 5.78 | 5.25 |
| MTAP               | 5.59 | 5.99 | 5.28 |
| SPSB3              | 5.59 | 5.88 | 5.21 |
| FDX1               | 5.59 | 5.93 | 5.13 |
| TPRKB              | 5.59 | 6.11 | 5.04 |
| ZNF582-AS1         | 5.59 | 5.94 | 4.98 |
| ARRDC4             | 5.59 | 6.03 | 5.12 |
| ECSIT              | 5.59 | 6.09 | 4.77 |
| GUCY1B3            | 5.59 | 6.16 | 5.16 |
| PTPRE              | 5.59 | 6.06 | 5.10 |
| CFD                | 5.59 | 6.06 | 4.97 |
| KLK2               | 5.59 | 5.98 | 5.23 |
| SLC16A3            | 5.59 | 6.10 | 5.22 |
| FBXO21             | 5.59 | 5.91 | 5.37 |
| KLK8               | 5.59 | 5.88 | 5.06 |
| MUM1               | 5.59 | 5.93 | 5.29 |
| ECHDC1             | 5.59 | 5.87 | 5.08 |
| PRR26              | 5.59 | 5.95 | 5.13 |
| OTTHUMG00000058163 | 5.59 | 6.12 | 5.29 |
| PTH2               | 5.59 | 5.97 | 5.30 |
| KLHDC4             | 5.59 | 5.80 | 5.39 |
| C1orf162           | 5.59 | 6.69 | 5.03 |
| RPS24              | 5.59 | 5.72 | 5.39 |
| PRPF18             | 5.59 | 5.82 | 5.01 |
| PTGER2             | 5.59 | 5.93 | 5.24 |
| MAK                | 5.59 | 5.90 | 5.35 |

|             |      |      |      |
|-------------|------|------|------|
| MAP4K3      | 5.59 | 5.92 | 5.18 |
| CTRL        | 5.58 | 5.83 | 5.02 |
| CTSW        | 5.58 | 5.98 | 5.29 |
| SNORD115-39 | 5.58 | 6.68 | 4.63 |
| ZNF324B     | 5.58 | 6.03 | 5.35 |
| RDH5        | 5.58 | 5.82 | 5.34 |
| SERF2       | 5.58 | 5.93 | 5.22 |
| GHRLOS      | 5.58 | 5.89 | 5.32 |
| PPP5C       | 5.58 | 5.82 | 5.13 |
| SNX11       | 5.58 | 6.00 | 5.21 |
| GPATCH1     | 5.58 | 5.89 | 5.35 |
| RHOF        | 5.58 | 6.05 | 5.06 |
| PDE6D       | 5.58 | 5.88 | 5.12 |
| KCNMB1      | 5.58 | 5.98 | 5.13 |
| ROR2        | 5.58 | 6.48 | 5.15 |
| CAMKK2      | 5.58 | 6.02 | 4.96 |
| OR1S2       | 5.58 | 6.22 | 4.69 |
| ZNF800      | 5.58 | 5.97 | 5.13 |
| GPRC5B      | 5.58 | 6.11 | 4.44 |
| IGFALS      | 5.58 | 5.96 | 5.16 |
| FAM102B     | 5.58 | 6.51 | 4.22 |
| CXXC1       | 5.58 | 5.91 | 4.78 |
| SLC48A1     | 5.58 | 5.89 | 5.14 |
| FLOT2       | 5.58 | 6.07 | 5.32 |
| ZNF703      | 5.58 | 6.00 | 5.16 |
| PEX6        | 5.58 | 5.76 | 5.45 |
| LGALS4      | 5.58 | 6.08 | 5.24 |
| MEG9        | 5.58 | 5.89 | 5.24 |
| FLJ21369    | 5.58 | 5.91 | 5.13 |
| ENDOD1      | 5.58 | 6.00 | 4.83 |
| POM121L1P   | 5.58 | 6.07 | 4.77 |
| NPRL3       | 5.58 | 5.91 | 5.13 |
| CEP164      | 5.58 | 5.81 | 5.35 |
| WDR90       | 5.58 | 5.75 | 5.39 |
| GPS1        | 5.58 | 5.83 | 5.29 |
| METTL9      | 5.58 | 6.46 | 4.47 |
| MICAL2      | 5.58 | 6.57 | 5.06 |
| MRPL45      | 5.58 | 6.02 | 4.75 |
| EVL         | 5.58 | 6.13 | 5.07 |
| PDDC1       | 5.58 | 5.86 | 5.40 |
| KATNAL1     | 5.58 | 6.25 | 4.83 |
| LCOR        | 5.58 | 5.99 | 4.80 |
| RBBP9       | 5.58 | 6.22 | 4.81 |
| CERS5       | 5.58 | 6.22 | 4.92 |
| PCP4L1      | 5.58 | 6.41 | 5.29 |
| VKORC1      | 5.58 | 6.14 | 5.07 |
| WDFY1       | 5.58 | 6.17 | 4.90 |
| CHMP2B      | 5.58 | 6.00 | 4.88 |
| PIK3R4      | 5.58 | 5.90 | 5.13 |

|              |      |      |      |
|--------------|------|------|------|
| DPY19L2      | 5.58 | 6.10 | 4.70 |
| ATE1         | 5.58 | 5.87 | 5.16 |
| COMTD1       | 5.58 | 6.16 | 5.19 |
| POU5F1P3     | 5.58 | 6.19 | 4.68 |
| ZNF251       | 5.58 | 5.78 | 5.34 |
| COMMD5       | 5.58 | 6.01 | 5.18 |
| SLC25A29     | 5.58 | 5.82 | 5.15 |
| NEK3         | 5.58 | 6.05 | 4.79 |
| KXD1         | 5.58 | 6.12 | 4.66 |
| POLR3H       | 5.58 | 6.06 | 5.21 |
| DGCR8        | 5.58 | 6.09 | 5.11 |
| PEG3-AS1     | 5.58 | 6.71 | 5.09 |
| HCG4         | 5.58 | 6.32 | 5.05 |
| LOC285463    | 5.58 | 6.06 | 5.27 |
| PLIN1        | 5.58 | 6.32 | 4.47 |
| TBC1D13      | 5.58 | 5.91 | 5.18 |
| SHISA4       | 5.58 | 5.84 | 5.26 |
| ACTR10       | 5.58 | 5.98 | 4.99 |
| DTWD1        | 5.58 | 6.20 | 4.98 |
| LIN7B        | 5.58 | 5.84 | 5.16 |
| SREBF2       | 5.58 | 5.92 | 5.16 |
| LOC100506651 | 5.58 | 6.00 | 4.98 |
| C15orf61     | 5.58 | 6.00 | 5.25 |
| OR4F29       | 5.57 | 5.83 | 5.15 |
| ZNF692       | 5.57 | 5.85 | 5.06 |
| RIC8A        | 5.57 | 5.99 | 5.42 |
| NKG7         | 5.57 | 5.75 | 5.33 |
| MTIF3        | 5.57 | 5.89 | 5.03 |
| PDXK         | 5.57 | 6.13 | 5.09 |
| ADCK3        | 5.57 | 5.80 | 5.29 |
| ODF3L2       | 5.57 | 6.05 | 5.25 |
| ZNF624       | 5.57 | 5.83 | 5.36 |
| PHF20        | 5.57 | 5.90 | 5.11 |
| P2RY2        | 5.57 | 5.94 | 5.20 |
| C17orf97     | 5.57 | 6.11 | 5.02 |
| PTPN21       | 5.57 | 6.24 | 4.93 |
| RAP2A        | 5.57 | 6.30 | 4.62 |
| LOC441242    | 5.57 | 6.32 | 5.22 |
| RPLP1        | 5.57 | 6.20 | 4.42 |
| LYG1         | 5.57 | 6.06 | 4.52 |
| ASB13        | 5.57 | 5.86 | 5.30 |
| EXOC7        | 5.57 | 5.94 | 5.16 |
| ICAM1        | 5.57 | 5.95 | 5.38 |
| SAMD9        | 5.57 | 6.27 | 5.01 |
| TIMM22       | 5.57 | 6.18 | 5.05 |
| RNA5SP278    | 5.57 | 6.31 | 4.85 |
| LOC284373    | 5.57 | 5.74 | 5.19 |
| TBKBP1       | 5.57 | 5.93 | 5.30 |
| HIGD1B       | 5.57 | 6.77 | 4.89 |

|                    |      |      |      |
|--------------------|------|------|------|
| LY86               | 5.57 | 6.65 | 5.20 |
| RNF224             | 5.57 | 6.18 | 5.08 |
| RARB               | 5.57 | 6.31 | 4.70 |
| OTTHUMG00000150945 | 5.57 | 5.95 | 5.07 |
| CCDC91             | 5.57 | 5.92 | 5.16 |
| LEAP2              | 5.57 | 5.88 | 5.23 |
| FAM204A            | 5.57 | 5.97 | 5.20 |
| PDZD11             | 5.57 | 6.01 | 4.92 |
| RAB5C              | 5.57 | 5.92 | 4.88 |
| CTNNAL1            | 5.57 | 6.02 | 4.73 |
| ZNF575             | 5.57 | 5.75 | 5.13 |
| SNRK-AS1           | 5.57 | 5.91 | 5.11 |
| SLC39A11           | 5.57 | 5.94 | 4.71 |
| SSBP1              | 5.57 | 5.84 | 5.15 |
| ZMYND19            | 5.57 | 5.96 | 5.25 |
| RNA5SP447          | 5.57 | 6.95 | 4.49 |
| G0S2               | 5.57 | 6.44 | 4.55 |
| CITED2             | 5.57 | 5.89 | 5.03 |
| VAMP1              | 5.57 | 5.97 | 5.22 |
| ZDBF2              | 5.57 | 6.41 | 4.79 |
| MAP7D1             | 5.57 | 5.99 | 5.21 |
| PYCR1              | 5.57 | 5.94 | 5.31 |
| AP4E1              | 5.57 | 6.00 | 5.00 |
| CNTNAP3            | 5.57 | 6.50 | 4.59 |
| OTTHUMG00000041543 | 5.57 | 5.92 | 4.69 |
| PAR3B              | 5.57 | 5.84 | 5.22 |
| NME7               | 5.57 | 6.13 | 5.18 |
| LINC00328          | 5.57 | 6.13 | 4.85 |
| POLR2C             | 5.57 | 5.87 | 5.09 |
| MIR3925            | 5.57 | 6.07 | 5.06 |
| EMC10              | 5.57 | 5.81 | 5.37 |
| ZNF844             | 5.57 | 5.87 | 4.94 |
| HCK                | 5.57 | 6.14 | 4.99 |
| C16orf98           | 5.57 | 5.82 | 5.38 |
| ANAPC4             | 5.57 | 5.88 | 5.28 |
| HPRT1              | 5.57 | 6.20 | 4.96 |
| ASPG               | 5.57 | 5.97 | 5.29 |
| C2orf82            | 5.57 | 6.11 | 5.03 |
| C3orf38            | 5.56 | 6.05 | 4.80 |
| MASTL              | 5.56 | 6.23 | 5.14 |
| STARD3             | 5.56 | 5.88 | 5.30 |
| WDR53              | 5.56 | 5.79 | 5.16 |
| OTTHUMG00000170596 | 5.56 | 5.89 | 5.33 |
| CXCL16             | 5.56 | 7.29 | 4.72 |
| TCP11L1            | 5.56 | 6.00 | 5.05 |
| ADAMTS14           | 5.56 | 6.07 | 5.32 |
| LOC400548          | 5.56 | 5.92 | 4.98 |
| LDOC1              | 5.56 | 5.81 | 5.32 |
| GPR157             | 5.56 | 5.84 | 5.29 |



|                    |      |      |      |
|--------------------|------|------|------|
| GIMAP6             | 5.56 | 5.91 | 4.92 |
| RDH11              | 5.56 | 5.82 | 5.10 |
| AKTIP              | 5.56 | 6.24 | 4.66 |
| OTTHUMG00000152444 | 5.56 | 5.97 | 5.28 |
| USP45              | 5.56 | 6.02 | 4.97 |
| SMPD4              | 5.56 | 5.93 | 5.06 |
| DES12              | 5.56 | 6.61 | 4.73 |
| C12orf68           | 5.56 | 5.91 | 5.16 |
| ARHGAP23           | 5.56 | 5.81 | 5.12 |
| LOC646762          | 5.56 | 5.91 | 5.18 |
| DGCR6L             | 5.56 | 6.00 | 4.62 |
| TMEM185A           | 5.56 | 5.92 | 5.29 |
| DOCK5              | 5.56 | 5.94 | 4.97 |
| VPS26B             | 5.56 | 5.95 | 5.04 |
| TAF5L              | 5.56 | 5.89 | 5.08 |
| TMA7               | 5.56 | 5.95 | 5.37 |
| BBS10              | 5.56 | 5.91 | 4.99 |
| TRAF3IP1           | 5.56 | 5.81 | 5.19 |
| SLC9A6             | 5.56 | 6.02 | 4.85 |
| SLC2A13            | 5.56 | 5.82 | 5.34 |
| SYT5               | 5.56 | 5.94 | 4.83 |
| C2orf27A           | 5.56 | 6.00 | 5.13 |
| TOMM40             | 5.56 | 5.89 | 5.30 |
| JOSD1              | 5.56 | 5.97 | 4.93 |
| DBNL               | 5.56 | 5.74 | 5.09 |
| PRKD1              | 5.56 | 6.03 | 5.16 |
| CSPG5              | 5.56 | 6.04 | 5.22 |
| CHST11             | 5.56 | 5.98 | 5.26 |
| SAMM50             | 5.56 | 6.09 | 5.00 |
| ZNF514             | 5.56 | 6.00 | 4.47 |
| TTC39B             | 5.56 | 5.98 | 5.14 |
| LENG8-AS1          | 5.56 | 5.99 | 5.14 |
| HEPN1              | 5.56 | 6.04 | 4.92 |
| SIGLEC16           | 5.56 | 6.35 | 4.95 |
| CCDC12             | 5.56 | 5.85 | 5.15 |
| PMS2P3             | 5.56 | 6.06 | 4.98 |
| LOC728208          | 5.56 | 6.15 | 5.09 |
| FAM95B1            | 5.56 | 6.32 | 4.92 |
| SGMS2              | 5.56 | 6.24 | 4.85 |
| AGPAT5             | 5.56 | 6.01 | 5.03 |
| MRPL48             | 5.56 | 5.98 | 5.12 |
| SEPT10             | 5.56 | 6.18 | 4.65 |
| LOC100507918       | 5.56 | 5.73 | 5.16 |
| CCDC86             | 5.56 | 5.86 | 5.31 |
| TMED9              | 5.56 | 5.83 | 5.05 |
| TSC22D1            | 5.56 | 5.86 | 5.24 |
| LOC100996664       | 5.56 | 5.99 | 5.25 |
| TBC1D2B            | 5.56 | 5.93 | 4.94 |
| ZNF770             | 5.56 | 6.02 | 4.96 |

|                    |      |      |      |
|--------------------|------|------|------|
| OTTHUMG00000132657 | 5.56 | 6.20 | 5.11 |
| PHLDB1             | 5.56 | 5.98 | 5.08 |
| C11orf73           | 5.56 | 5.84 | 5.23 |
| ACAT1              | 5.56 | 6.01 | 4.82 |
| FBXL8              | 5.56 | 6.01 | 5.21 |
| EEF2K              | 5.56 | 5.93 | 4.86 |
| LOC100507346       | 5.56 | 6.61 | 4.10 |
| SULT2B1            | 5.56 | 5.98 | 5.31 |
| TRBV200R9-2        | 5.56 | 5.84 | 5.03 |
| LSG1               | 5.56 | 5.76 | 5.41 |
| PRKAB1             | 5.56 | 5.86 | 5.25 |
| SH3RF1             | 5.56 | 5.96 | 5.13 |
| CTAGE6             | 5.55 | 6.20 | 4.74 |
| MIR33B             | 5.55 | 6.31 | 5.06 |
| TNRC6C             | 5.55 | 6.10 | 5.05 |
| RNF7               | 5.55 | 6.13 | 4.97 |
| CNN1               | 5.55 | 5.93 | 5.12 |
| EMILIN3            | 5.55 | 6.29 | 4.75 |
| FCN1               | 5.55 | 5.96 | 5.25 |
| DOCK10             | 5.55 | 6.30 | 5.09 |
| SNORD4B            | 5.55 | 6.52 | 4.91 |
| GLE1               | 5.55 | 5.79 | 5.27 |
| CHMP1A             | 5.55 | 5.78 | 5.16 |
| ZNF629             | 5.55 | 5.95 | 5.30 |
| GABPB1             | 5.55 | 6.04 | 5.09 |
| BBS4               | 5.55 | 5.89 | 5.33 |
| OPN1MW             | 5.55 | 6.05 | 5.05 |
| DCUN1D5            | 5.55 | 6.16 | 4.95 |
| OR2W3              | 5.55 | 6.12 | 5.20 |
| GLRX2              | 5.55 | 6.24 | 5.03 |
| RNA5SP408          | 5.55 | 6.00 | 5.21 |
| RBM23              | 5.55 | 5.95 | 4.96 |
| OTTHUMG00000170768 | 5.55 | 5.89 | 5.27 |
| SST                | 5.55 | 6.07 | 5.03 |
| DNASE1L1           | 5.55 | 5.96 | 5.06 |
| IFT81              | 5.55 | 5.80 | 5.27 |
| RAD9A              | 5.55 | 5.93 | 5.05 |
| MAP3K5             | 5.55 | 6.15 | 4.91 |
| NAV2-AS2           | 5.55 | 5.96 | 5.25 |
| ZFP69              | 5.55 | 5.90 | 5.13 |
| FKBP5              | 5.55 | 6.61 | 4.92 |
| NME4               | 5.55 | 5.78 | 5.32 |
| MIR181C            | 5.55 | 6.13 | 5.14 |
| GLIPR2             | 5.55 | 6.18 | 4.64 |
| KIF18B             | 5.55 | 5.92 | 5.27 |
| KLHL5              | 5.55 | 5.98 | 5.14 |
| EFCAB13            | 5.55 | 6.35 | 4.75 |
| CAPZA1             | 5.55 | 6.08 | 4.84 |
| LINC00839          | 5.55 | 5.78 | 5.37 |

|                    |      |      |      |
|--------------------|------|------|------|
| SNORD114-27        | 5.55 | 6.79 | 4.76 |
| G3BP2              | 5.55 | 5.88 | 5.16 |
| SLC46A1            | 5.55 | 5.86 | 5.25 |
| PMS2P1             | 5.55 | 5.94 | 5.19 |
| OTTHUMG00000169707 | 5.55 | 6.03 | 5.17 |
| RPL7L1             | 5.55 | 5.70 | 5.28 |
| CPEB4              | 5.55 | 5.88 | 5.15 |
| PRPSAP2            | 5.55 | 5.82 | 5.33 |
| PGS1               | 5.55 | 6.01 | 5.06 |
| NSFL1C             | 5.55 | 5.95 | 5.16 |
| NFKBID             | 5.55 | 6.04 | 4.98 |
| MANBAL             | 5.55 | 5.75 | 5.35 |
| CSPG4P5            | 5.55 | 6.07 | 5.07 |
| SP3                | 5.55 | 5.89 | 4.94 |
| IGLV10-54          | 5.55 | 5.83 | 5.26 |
| ASNA1              | 5.55 | 6.01 | 5.24 |
| NRSN2              | 5.55 | 5.82 | 5.02 |
| STIM1              | 5.55 | 5.78 | 5.30 |
| DOCK6              | 5.55 | 5.97 | 5.16 |
| RPS20              | 5.55 | 5.75 | 5.30 |
| OTTHUMG00000169058 | 5.55 | 6.40 | 5.16 |
| PLEC               | 5.55 | 5.75 | 5.18 |
| TRAF7              | 5.55 | 5.79 | 5.23 |
| FAM200B            | 5.55 | 5.76 | 5.27 |
| SRR                | 5.55 | 6.14 | 4.85 |
| FBXO27             | 5.55 | 5.89 | 4.95 |
| NKAP               | 5.55 | 6.15 | 5.14 |
| HEMK1              | 5.55 | 5.97 | 5.24 |
| LPAR4              | 5.55 | 6.02 | 4.81 |
| ADIG               | 5.55 | 5.88 | 5.14 |
| OTTHUMG00000175982 | 5.55 | 5.78 | 5.28 |
| LOC100507487       | 5.55 | 6.02 | 5.09 |
| PDLIM4             | 5.55 | 5.99 | 5.22 |
| ERP29              | 5.54 | 5.69 | 5.38 |
| SNORD114-17        | 5.54 | 7.10 | 4.62 |
| KLF4               | 5.54 | 5.79 | 5.29 |
| SMIM13             | 5.54 | 5.92 | 5.19 |
| MID2               | 5.54 | 6.23 | 4.61 |
| RAD21              | 5.54 | 5.83 | 5.29 |
| MEAF6              | 5.54 | 5.83 | 5.15 |
| LOC100286925       | 5.54 | 6.02 | 5.36 |
| SNORD42A           | 5.54 | 5.90 | 5.26 |
| MIR3666            | 5.54 | 5.81 | 5.16 |
| MYOG               | 5.54 | 6.08 | 5.26 |
| SCAF1              | 5.54 | 5.98 | 4.79 |
| C1GALT1C1          | 5.54 | 5.81 | 5.27 |
| TCTN1              | 5.54 | 6.01 | 5.25 |
| UBALD1             | 5.54 | 5.81 | 4.84 |
| ZBTB37             | 5.54 | 5.85 | 5.07 |

|              |      |      |      |
|--------------|------|------|------|
| BARX1        | 5.54 | 5.79 | 5.25 |
| C5orf45      | 5.54 | 5.77 | 5.31 |
| CLPB         | 5.54 | 5.81 | 5.34 |
| CCSAP        | 5.54 | 5.82 | 5.14 |
| PPM1N        | 5.54 | 6.01 | 5.08 |
| RBM17        | 5.54 | 5.84 | 5.01 |
| SS18L1       | 5.54 | 5.76 | 5.37 |
| ZMAT3        | 5.54 | 5.95 | 5.19 |
| RAB28        | 5.54 | 5.91 | 5.05 |
| GYPC         | 5.54 | 5.93 | 5.28 |
| BLOC1S2      | 5.54 | 6.00 | 4.94 |
| SPATA13      | 5.54 | 5.90 | 5.32 |
| MIR3161      | 5.54 | 6.52 | 4.46 |
| UBE2I        | 5.54 | 5.88 | 5.12 |
| TARBP2       | 5.54 | 5.78 | 5.30 |
| PFDN6        | 5.54 | 5.82 | 5.33 |
| NSMCE2       | 5.54 | 5.83 | 5.19 |
| BCAP31       | 5.54 | 6.15 | 5.03 |
| FBXL19       | 5.54 | 5.85 | 5.34 |
| SLC15A4      | 5.54 | 6.18 | 5.06 |
| SNRNP35      | 5.54 | 5.83 | 5.20 |
| NBN          | 5.54 | 5.93 | 4.87 |
| ZNF300       | 5.54 | 6.13 | 4.64 |
| FKTN         | 5.54 | 5.90 | 5.09 |
| RAD17        | 5.54 | 6.04 | 5.09 |
| WWC3-AS1     | 5.54 | 5.83 | 5.08 |
| LOC100129361 | 5.54 | 6.03 | 4.77 |
| FURIN        | 5.54 | 6.05 | 5.22 |
| RNF149       | 5.54 | 6.00 | 4.98 |
| LOC100506821 | 5.54 | 6.17 | 5.01 |
| PKN1         | 5.54 | 6.29 | 4.75 |
| NCAPD2       | 5.54 | 5.84 | 4.81 |
| THYN1        | 5.54 | 5.81 | 5.22 |
| PLEKHF2      | 5.54 | 6.24 | 5.01 |
| TIMM50       | 5.54 | 5.97 | 5.02 |
| ZNF483       | 5.54 | 6.25 | 4.76 |
| NFATC1       | 5.54 | 5.82 | 5.30 |
| TRIM2        | 5.54 | 5.75 | 5.11 |
| ZNF419       | 5.54 | 5.72 | 5.33 |
| GAR1         | 5.54 | 5.91 | 5.16 |
| MOV10        | 5.54 | 5.82 | 5.27 |
| ZNF764       | 5.54 | 6.20 | 4.97 |
| MPG          | 5.54 | 5.79 | 5.06 |
| LOC644841    | 5.54 | 5.88 | 5.05 |
| GPIHBP1      | 5.54 | 5.92 | 4.83 |
| KIF3A        | 5.54 | 6.09 | 4.86 |
| UNC5B        | 5.54 | 6.28 | 4.81 |
| MCFD2        | 5.54 | 5.77 | 4.99 |
| RRP15        | 5.54 | 6.12 | 4.87 |

|              |      |      |      |
|--------------|------|------|------|
| FKSG29       | 5.54 | 5.96 | 5.23 |
| KIAA1324L    | 5.54 | 6.04 | 5.03 |
| RNF166       | 5.54 | 5.85 | 5.31 |
| SLC41A2      | 5.54 | 6.50 | 4.58 |
| TCF20        | 5.54 | 5.91 | 5.15 |
| NUP133       | 5.54 | 5.93 | 5.04 |
| CPT1C        | 5.54 | 5.79 | 5.29 |
| MIR4324      | 5.54 | 6.43 | 4.37 |
| CPSF2        | 5.54 | 6.17 | 4.83 |
| LRPAP1       | 5.54 | 5.84 | 5.22 |
| OR52W1       | 5.54 | 6.03 | 5.03 |
| ZFAND1       | 5.54 | 5.97 | 5.16 |
| RGL2         | 5.54 | 5.86 | 5.12 |
| VWA8         | 5.54 | 5.96 | 5.01 |
| COX10        | 5.53 | 6.27 | 5.08 |
| FOXK2        | 5.53 | 5.76 | 5.29 |
| STX6         | 5.53 | 6.00 | 5.16 |
| CDK5R2       | 5.53 | 6.01 | 5.14 |
| LOC100133299 | 5.53 | 6.33 | 4.76 |
| VSIG10L      | 5.53 | 5.75 | 4.87 |
| TOMM5        | 5.53 | 6.04 | 4.83 |
| RNU7-57P     | 5.53 | 5.87 | 4.65 |
| GLRX5        | 5.53 | 5.90 | 4.99 |
| CHD1         | 5.53 | 5.82 | 4.84 |
| MEOX1        | 5.53 | 5.79 | 5.14 |
| PIGS         | 5.53 | 6.03 | 5.23 |
| CD37         | 5.53 | 6.13 | 5.15 |
| TEP1         | 5.53 | 5.71 | 5.44 |
| TOM1         | 5.53 | 5.84 | 5.05 |
| SNORD114-2   | 5.53 | 7.51 | 4.10 |
| SMG5         | 5.53 | 5.69 | 5.29 |
| LINC00896    | 5.53 | 5.82 | 5.04 |
| LOC100289511 | 5.53 | 5.81 | 5.19 |
| ZNF32        | 5.53 | 5.87 | 5.22 |
| ALG3         | 5.53 | 5.94 | 5.19 |
| DDX11L1      | 5.53 | 6.42 | 4.87 |
| MIR4502      | 5.53 | 6.07 | 4.73 |
| ELK4         | 5.53 | 5.91 | 5.11 |
| CXorf23      | 5.53 | 5.93 | 4.75 |
| ADCK2        | 5.53 | 5.86 | 5.16 |
| ZBTB20-AS1   | 5.53 | 6.11 | 5.19 |
| FAM225B      | 5.53 | 6.14 | 4.54 |
| LHCGR        | 5.53 | 5.97 | 5.20 |
| C1QB         | 5.53 | 6.42 | 4.53 |
| USP30        | 5.53 | 5.75 | 5.33 |
| RABGAP1L     | 5.53 | 5.92 | 5.03 |
| UPF1         | 5.53 | 5.81 | 5.11 |
| AOC2         | 5.53 | 6.05 | 4.70 |
| PIGL         | 5.53 | 5.99 | 4.72 |

|                    |      |      |      |
|--------------------|------|------|------|
| RPRD1A             | 5.53 | 5.90 | 5.18 |
| FAM134C            | 5.53 | 6.08 | 5.09 |
| LOC100996419       | 5.53 | 5.88 | 4.77 |
| MIR4730            | 5.53 | 6.13 | 5.14 |
| SPATC1             | 5.53 | 6.24 | 4.71 |
| PGM1               | 5.53 | 6.09 | 4.82 |
| TSPAN17            | 5.53 | 5.80 | 5.11 |
| MICU1              | 5.53 | 6.06 | 4.92 |
| C7orf65            | 5.53 | 5.99 | 5.25 |
| APOA5              | 5.53 | 5.83 | 5.15 |
| HOXC-AS5           | 5.53 | 6.02 | 5.15 |
| SLC6A18            | 5.53 | 5.69 | 5.18 |
| PSORS1C1           | 5.53 | 5.73 | 4.97 |
| LMBR1L             | 5.53 | 5.95 | 5.23 |
| DLX4               | 5.53 | 5.76 | 5.11 |
| LOC100288866       | 5.53 | 5.92 | 5.04 |
| CCNC               | 5.53 | 6.12 | 5.03 |
| AOC3               | 5.53 | 6.48 | 4.62 |
| VSIG8              | 5.53 | 5.86 | 5.20 |
| CTPS1              | 5.53 | 5.94 | 5.18 |
| PPP1R13B           | 5.53 | 5.94 | 5.08 |
| ZNF248             | 5.53 | 6.15 | 5.20 |
| PTPN9              | 5.53 | 5.93 | 5.13 |
| RCBTB1             | 5.53 | 5.95 | 5.19 |
| THRB               | 5.53 | 6.07 | 4.92 |
| FMO4               | 5.53 | 6.36 | 4.85 |
| LY6G6F             | 5.53 | 5.80 | 5.18 |
| HHIPL1             | 5.53 | 6.29 | 5.04 |
| WDR37              | 5.53 | 5.77 | 5.33 |
| TSPAN13            | 5.53 | 6.30 | 4.51 |
| OTTHUMG00000020883 | 5.53 | 6.54 | 4.96 |
| CYP7B1             | 5.53 | 6.04 | 4.96 |
| GOLGA8H            | 5.53 | 6.19 | 5.13 |
| PHF5A              | 5.53 | 5.84 | 5.16 |
| CHRNA3             | 5.53 | 5.86 | 5.25 |
| LOC100506342       | 5.53 | 5.90 | 4.76 |
| CLSTN3             | 5.53 | 5.84 | 5.15 |
| ZNF320             | 5.53 | 6.02 | 4.92 |
| PPP3CC             | 5.53 | 6.17 | 4.50 |
| TMEM241            | 5.53 | 5.79 | 5.16 |
| GNG13              | 5.53 | 6.24 | 5.02 |
| CCL21              | 5.53 | 8.09 | 4.48 |
| CT47A7             | 5.53 | 5.86 | 5.32 |
| R3HCC1L            | 5.53 | 6.06 | 4.80 |
| LOC100506388       | 5.53 | 6.05 | 4.88 |
| IGLJ2              | 5.53 | 6.45 | 4.92 |
| STAG2              | 5.53 | 6.01 | 4.97 |
| CSNK2A1            | 5.53 | 6.25 | 4.80 |
| ZNF197             | 5.53 | 5.83 | 5.23 |

|                    |      |      |      |
|--------------------|------|------|------|
| PTGR2              | 5.53 | 5.84 | 5.18 |
| MFAP3              | 5.53 | 5.89 | 4.61 |
| ANKRD63            | 5.53 | 5.90 | 5.13 |
| CAHM               | 5.53 | 5.96 | 5.24 |
| GSDMB              | 5.52 | 5.81 | 5.19 |
| OTTHUMG00000170970 | 5.52 | 5.78 | 5.11 |
| SERINC5            | 5.52 | 6.20 | 5.14 |
| ZNF329             | 5.52 | 5.99 | 5.01 |
| PNOC               | 5.52 | 6.10 | 5.13 |
| DENND4B            | 5.52 | 5.70 | 5.31 |
| OTTHUMG00000150838 | 5.52 | 6.40 | 4.80 |
| ZNF780A            | 5.52 | 5.83 | 5.11 |
| AQP3               | 5.52 | 5.96 | 5.08 |
| CDCA4              | 5.52 | 6.01 | 5.13 |
| QSER1              | 5.52 | 5.95 | 4.79 |
| TRAPPC4            | 5.52 | 6.09 | 5.06 |
| LY6G6C             | 5.52 | 6.15 | 5.23 |
| UCA1               | 5.52 | 6.17 | 4.90 |
| SUDS3              | 5.52 | 5.87 | 4.98 |
| OTTHUMG00000160084 | 5.52 | 5.82 | 5.21 |
| PEX16              | 5.52 | 5.83 | 5.26 |
| LOC644135          | 5.52 | 6.01 | 4.92 |
| OTTHUMG00000067240 | 5.52 | 6.42 | 4.98 |
| SMC4               | 5.52 | 6.24 | 4.88 |
| LOC375295          | 5.52 | 5.80 | 5.11 |
| ECHDC2             | 5.52 | 5.97 | 5.18 |
| APLN               | 5.52 | 5.94 | 5.19 |
| C19orf24           | 5.52 | 5.72 | 5.35 |
| NDUFAF7            | 5.52 | 5.95 | 5.10 |
| TRAF5              | 5.52 | 6.17 | 5.01 |
| BRSK1              | 5.52 | 5.87 | 5.18 |
| FLJ46875           | 5.52 | 5.90 | 5.17 |
| SEC23B             | 5.52 | 5.96 | 5.06 |
| JUN                | 5.52 | 6.69 | 4.20 |
| IL17RC             | 5.52 | 5.81 | 5.09 |
| NR2C1              | 5.52 | 5.97 | 4.92 |
| NME1-NME2          | 5.52 | 5.81 | 5.23 |
| ENTHD2             | 5.52 | 5.73 | 5.37 |
| ZNF614             | 5.52 | 5.80 | 5.09 |
| LOC100506219       | 5.52 | 6.28 | 5.09 |
| THNSL2             | 5.52 | 5.92 | 5.21 |
| CYYR1              | 5.52 | 6.06 | 4.72 |
| AKT2               | 5.52 | 5.76 | 5.07 |
| GDAP2              | 5.52 | 5.99 | 5.03 |
| ZCCHC5             | 5.52 | 5.89 | 5.04 |
| ENOX1              | 5.52 | 5.85 | 5.06 |
| BRWD3              | 5.52 | 6.11 | 5.02 |
| CASP8AP2           | 5.52 | 6.06 | 4.66 |
| CLIC6              | 5.52 | 6.10 | 5.02 |

|                    |      |      |      |
|--------------------|------|------|------|
| TRIM28             | 5.52 | 5.93 | 4.94 |
| DHRS1              | 5.52 | 5.82 | 4.88 |
| LOC388242          | 5.52 | 5.69 | 5.33 |
| LINC00632          | 5.52 | 5.81 | 5.14 |
| DPY19L3            | 5.52 | 6.05 | 5.07 |
| RNA5SP490          | 5.52 | 6.13 | 5.17 |
| SPRR3              | 5.52 | 6.00 | 5.27 |
| RIPK2              | 5.52 | 6.08 | 4.77 |
| CENPA              | 5.52 | 5.67 | 5.26 |
| INADL              | 5.52 | 5.74 | 5.12 |
| KCTD2              | 5.52 | 6.12 | 5.23 |
| GATSL1             | 5.52 | 5.79 | 5.20 |
| NLGN4Y-AS1         | 5.52 | 5.87 | 4.98 |
| IL10RA             | 5.52 | 6.71 | 4.83 |
| ENO1-IT1           | 5.52 | 6.39 | 4.89 |
| POLR3A             | 5.52 | 5.97 | 5.22 |
| OTTHUMG00000163653 | 5.52 | 6.39 | 5.09 |
| GCOM1              | 5.52 | 5.69 | 5.29 |
| UBE2W              | 5.52 | 5.99 | 5.10 |
| FAM189B            | 5.52 | 5.75 | 5.24 |
| TAB3-AS1           | 5.52 | 5.84 | 4.86 |
| MIB2               | 5.52 | 5.81 | 5.20 |
| MRPL11             | 5.52 | 5.83 | 4.82 |
| PRPF40B            | 5.52 | 5.88 | 5.04 |
| PDE4D              | 5.52 | 5.89 | 5.05 |
| DSC2               | 5.52 | 6.25 | 4.93 |
| SLC25A1            | 5.52 | 5.85 | 5.16 |
| IGSF3              | 5.52 | 5.81 | 5.16 |
| GPR155             | 5.52 | 6.75 | 4.70 |
| SEPP1              | 5.52 | 6.16 | 4.77 |
| IFRD2              | 5.52 | 5.82 | 5.00 |
| SIN3B              | 5.52 | 5.71 | 5.35 |
| KDM5D              | 5.52 | 6.66 | 3.71 |
| CCDC22             | 5.52 | 5.66 | 5.23 |
| SP7                | 5.52 | 6.13 | 5.04 |
| MIR558             | 5.51 | 5.92 | 4.91 |
| ACAT2              | 5.51 | 5.87 | 4.78 |
| ZNF107             | 5.51 | 6.29 | 5.01 |
| SLC16A10           | 5.51 | 6.26 | 4.86 |
| OTTHUMG00000173098 | 5.51 | 5.74 | 5.29 |
| OTTHUMG00000164014 | 5.51 | 6.14 | 4.96 |
| BTBD9-AS1          | 5.51 | 5.88 | 4.88 |
| MIR345             | 5.51 | 6.38 | 4.87 |
| KIAA0556           | 5.51 | 5.68 | 5.32 |
| BTBD19             | 5.51 | 5.88 | 5.17 |
| CCDC144A           | 5.51 | 6.71 | 4.43 |
| MIR3147            | 5.51 | 6.56 | 4.72 |
| MIR1587            | 5.51 | 6.18 | 4.78 |
| YWHAB              | 5.51 | 5.86 | 4.73 |



|                    |      |      |      |
|--------------------|------|------|------|
| UBA5               | 5.51 | 5.74 | 5.12 |
| RUSC1              | 5.51 | 5.73 | 5.11 |
| MTMR12             | 5.51 | 6.02 | 5.11 |
| OTTHUMG00000168308 | 5.51 | 5.89 | 5.20 |
| TIRAP              | 5.51 | 5.94 | 5.22 |
| SNCA               | 5.51 | 6.06 | 4.96 |
| OTTHUMG00000164544 | 5.51 | 5.92 | 5.26 |
| C1orf95            | 5.51 | 5.93 | 5.04 |
| BRD3               | 5.51 | 5.80 | 5.01 |
| ANKFY1             | 5.51 | 5.94 | 4.69 |
| RILPL1             | 5.51 | 5.86 | 5.07 |
| GMFB               | 5.51 | 6.17 | 4.88 |
| FBLN5              | 5.51 | 6.57 | 4.90 |
| RBL1               | 5.51 | 5.99 | 4.89 |
| GNB4               | 5.51 | 6.07 | 4.95 |
| FARP2              | 5.51 | 5.77 | 5.18 |
| RALGAPA2           | 5.51 | 5.96 | 5.18 |
| NAA25              | 5.51 | 5.74 | 5.12 |
| ABHD5              | 5.51 | 5.73 | 5.24 |
| DLG3               | 5.51 | 5.95 | 5.26 |
| TNRC18             | 5.51 | 5.74 | 5.24 |
| PACS2              | 5.51 | 5.77 | 5.23 |
| MUSTN1             | 5.51 | 5.84 | 5.00 |
| SH3D21             | 5.51 | 6.03 | 5.02 |
| OR1D4              | 5.51 | 6.43 | 4.83 |
| SIAE               | 5.51 | 5.75 | 4.97 |
| EFCC1              | 5.51 | 6.02 | 4.89 |
| HIST2H2BA          | 5.51 | 6.20 | 4.78 |
| LOC100507032       | 5.51 | 5.97 | 4.90 |
| ZNF143             | 5.51 | 5.80 | 5.27 |
| SPATA7             | 5.51 | 6.05 | 4.93 |
| POLA1              | 5.51 | 5.87 | 4.98 |
| SNX25              | 5.51 | 5.91 | 4.42 |
| SELM               | 5.51 | 5.72 | 5.21 |
| MEIS3P1            | 5.51 | 5.84 | 5.00 |
| IGSF9B             | 5.51 | 5.79 | 4.91 |
| SUSD2              | 5.51 | 5.89 | 5.21 |
| LINC00619          | 5.51 | 6.09 | 5.13 |
| TNK2               | 5.51 | 5.74 | 5.19 |
| LOC100506392       | 5.51 | 6.03 | 4.73 |
| MEPCE              | 5.51 | 5.77 | 5.13 |
| PPP4R4             | 5.51 | 6.17 | 4.89 |
| DNASE1L2           | 5.51 | 5.96 | 5.15 |
| DCAF8              | 5.51 | 5.85 | 5.22 |
| LINC00083          | 5.51 | 5.98 | 5.03 |
| RNA5SP135          | 5.51 | 6.52 | 4.74 |
| OTTHUMG00000168486 | 5.51 | 5.95 | 5.09 |
| AVEN               | 5.51 | 5.98 | 5.04 |
| MZT2B              | 5.51 | 5.88 | 4.93 |

|                    |      |      |      |
|--------------------|------|------|------|
| FAM193A            | 5.51 | 5.85 | 4.78 |
| LETMD1             | 5.51 | 5.84 | 5.20 |
| RNASET2            | 5.51 | 6.15 | 5.06 |
| RPL31              | 5.51 | 5.99 | 4.94 |
| KBTBD2             | 5.51 | 5.90 | 4.82 |
| RGS14              | 5.51 | 5.78 | 5.11 |
| ZNF660             | 5.51 | 6.02 | 4.86 |
| MAPK7              | 5.51 | 5.87 | 5.09 |
| OTTHUMG00000171718 | 5.51 | 6.15 | 5.07 |
| ATP5J              | 5.51 | 6.00 | 4.68 |
| LY6G6D             | 5.51 | 5.90 | 5.16 |
| SETD8              | 5.51 | 5.81 | 5.11 |
| C1orf132           | 5.51 | 5.86 | 5.16 |
| CELSR2             | 5.51 | 5.80 | 5.26 |
| FTSJ2              | 5.50 | 5.84 | 4.86 |
| PRPH               | 5.50 | 6.05 | 5.24 |
| MRPL34             | 5.50 | 5.77 | 5.19 |
| BPGM               | 5.50 | 6.22 | 5.02 |
| LOC100132174       | 5.50 | 6.01 | 4.89 |
| PEX5               | 5.50 | 5.70 | 5.19 |
| KREMEN1            | 5.50 | 6.12 | 4.76 |
| CMTM4              | 5.50 | 6.06 | 5.11 |
| ATR                | 5.50 | 5.90 | 4.74 |
| TOP2A              | 5.50 | 6.72 | 4.20 |
| POMT2              | 5.50 | 5.77 | 5.24 |
| TRIM68             | 5.50 | 5.78 | 5.20 |
| IFT80              | 5.50 | 5.95 | 5.14 |
| C15orf38           | 5.50 | 5.89 | 5.18 |
| GSTM1              | 5.50 | 5.94 | 5.14 |
| TRIM3              | 5.50 | 5.70 | 5.25 |
| NCEH1              | 5.50 | 6.23 | 5.06 |
| TAB3               | 5.50 | 5.99 | 4.77 |
| ISY1-RAB43         | 5.50 | 5.89 | 5.17 |
| C1QTNF1            | 5.50 | 5.98 | 5.15 |
| RBM15              | 5.50 | 5.94 | 4.88 |
| SPDYC              | 5.50 | 5.74 | 5.10 |
| OTTHUMG00000172599 | 5.50 | 5.98 | 4.98 |
| FAM122B            | 5.50 | 5.69 | 5.30 |
| ATG5               | 5.50 | 6.21 | 4.69 |
| LOC100129697       | 5.50 | 5.78 | 5.21 |
| OR2T27             | 5.50 | 6.38 | 4.92 |
| ADAM15             | 5.50 | 5.97 | 5.21 |
| LOC100128563       | 5.50 | 5.90 | 4.73 |
| AP5Z1              | 5.50 | 5.93 | 5.09 |
| MPDU1              | 5.50 | 5.79 | 4.98 |
| LNP1               | 5.50 | 5.80 | 5.06 |
| MAP1LC3C           | 5.50 | 7.51 | 4.30 |
| SPR                | 5.50 | 6.10 | 4.90 |
| PHF19              | 5.50 | 5.79 | 5.16 |

|              |      |      |      |
|--------------|------|------|------|
| PSAT1        | 5.50 | 5.95 | 4.95 |
| ZNF680       | 5.50 | 5.98 | 4.87 |
| LINC00893    | 5.50 | 5.95 | 4.58 |
| CYB561A3     | 5.50 | 5.71 | 5.12 |
| OR2M1P       | 5.50 | 6.06 | 5.07 |
| TRPC7-AS1    | 5.50 | 5.79 | 5.23 |
| MED17        | 5.50 | 6.00 | 4.81 |
| LOC100287166 | 5.50 | 5.73 | 5.16 |
| MIR4803      | 5.50 | 6.19 | 5.04 |
| LDB2         | 5.50 | 6.25 | 4.58 |
| NUPR1L       | 5.50 | 6.15 | 3.57 |
| STAMBPL1     | 5.50 | 6.08 | 4.92 |
| ACSS2        | 5.50 | 5.94 | 5.25 |
| FAM171B      | 5.50 | 6.09 | 4.79 |
| TNKS         | 5.50 | 5.83 | 5.10 |
| TFIP11       | 5.50 | 6.01 | 4.75 |
| UBE2H        | 5.50 | 6.02 | 4.94 |
| FLJ46300     | 5.50 | 5.94 | 5.08 |
| SLC35B2      | 5.50 | 6.15 | 4.97 |
| SMAGP        | 5.50 | 6.02 | 5.22 |
| RCBTB2       | 5.50 | 5.86 | 5.16 |
| TMEM245      | 5.50 | 5.82 | 4.91 |
| NR2C2AP      | 5.50 | 5.73 | 5.14 |
| DACT3        | 5.50 | 5.92 | 5.20 |
| MBD3L3       | 5.50 | 6.15 | 5.15 |
| UNC13B       | 5.50 | 5.88 | 5.31 |
| ZNF100       | 5.50 | 6.47 | 4.62 |
| ATXN1L       | 5.50 | 6.06 | 4.72 |
| DNTTIP2      | 5.50 | 6.05 | 4.78 |
| PRAMEF16     | 5.50 | 6.82 | 4.78 |
| SNHG17       | 5.50 | 6.31 | 5.10 |
| AQP5         | 5.50 | 5.81 | 5.04 |
| EMG1         | 5.50 | 5.87 | 4.90 |
| ANP32A-IT1   | 5.50 | 6.05 | 4.99 |
| INTS6        | 5.50 | 5.77 | 5.18 |
| HSP90AA1     | 5.50 | 5.96 | 4.94 |
| MGST2        | 5.50 | 6.14 | 5.08 |
| UBFD1        | 5.50 | 5.99 | 5.21 |
| MOK          | 5.50 | 5.87 | 5.07 |
| DNMBP        | 5.50 | 5.82 | 5.12 |
| LCAT         | 5.50 | 5.94 | 4.98 |
| KRTAP12-3    | 5.50 | 5.91 | 5.19 |
| ZNF311       | 5.50 | 5.87 | 5.18 |
| HOOK2        | 5.50 | 5.88 | 5.31 |
| NAGS         | 5.50 | 5.77 | 5.22 |
| ANXA8        | 5.50 | 5.98 | 5.29 |
| EPB41L4A-AS1 | 5.50 | 5.80 | 5.02 |
| PNKP         | 5.50 | 5.98 | 5.20 |
| LOC392196    | 5.50 | 5.93 | 5.13 |

|                    |      |      |      |
|--------------------|------|------|------|
| CHFR               | 5.50 | 5.96 | 5.00 |
| LRRC32             | 5.50 | 7.04 | 4.51 |
| TEX261             | 5.50 | 6.11 | 4.49 |
| DCP1A              | 5.50 | 5.75 | 4.87 |
| ELOF1              | 5.50 | 6.19 | 4.74 |
| OTTHUMG00000161870 | 5.50 | 6.10 | 5.26 |
| C17orf61-PLSCR3    | 5.49 | 5.78 | 5.06 |
| GAREM              | 5.49 | 6.03 | 5.09 |
| FGF10              | 5.49 | 6.68 | 3.88 |
| UBOX5-AS1          | 5.49 | 5.81 | 5.10 |
| PPP1R12C           | 5.49 | 5.72 | 5.26 |
| LPAR6              | 5.49 | 6.06 | 4.82 |
| MGAT1              | 5.49 | 5.86 | 5.00 |
| TADA3              | 5.49 | 5.87 | 4.93 |
| SMIM10             | 5.49 | 5.87 | 5.06 |
| ZGLP1              | 5.49 | 5.85 | 5.04 |
| MIR1296            | 5.49 | 5.87 | 5.20 |
| AP2A1              | 5.49 | 5.77 | 5.20 |
| RPP14              | 5.49 | 5.88 | 5.13 |
| SNX8               | 5.49 | 5.67 | 5.19 |
| KCNN4              | 5.49 | 5.70 | 5.06 |
| KLF11              | 5.49 | 5.90 | 4.81 |
| MUTYH              | 5.49 | 5.85 | 5.11 |
| GZMM               | 5.49 | 5.96 | 5.16 |
| CDKAL1             | 5.49 | 5.95 | 4.93 |
| OTTHUMG00000176557 | 5.49 | 5.80 | 5.16 |
| ATP6V1A            | 5.49 | 6.23 | 4.76 |
| NMI                | 5.49 | 6.52 | 4.37 |
| LINC00921          | 5.49 | 5.80 | 4.99 |
| TACO1              | 5.49 | 5.91 | 4.77 |
| MAR5               | 5.49 | 5.95 | 4.87 |
| OTTHUMG00000018061 | 5.49 | 5.77 | 5.05 |
| PCNXL3             | 5.49 | 5.80 | 4.81 |
| LCN2               | 5.49 | 6.12 | 5.16 |
| SLC25A34           | 5.49 | 5.84 | 5.28 |
| OTTHUMG00000016040 | 5.49 | 5.81 | 4.87 |
| PRKCZ              | 5.49 | 5.88 | 5.10 |
| OTTHUMG00000163517 | 5.49 | 6.09 | 5.03 |
| TSKU               | 5.49 | 6.14 | 4.75 |
| OVOL3              | 5.49 | 5.87 | 5.11 |
| ZNF513             | 5.49 | 5.92 | 5.26 |
| IFI27L2            | 5.49 | 6.03 | 5.20 |
| SEMA5B             | 5.49 | 5.94 | 5.13 |
| HSD3B7             | 5.49 | 5.83 | 5.06 |
| RANBP3L            | 5.49 | 6.27 | 4.61 |
| PSMF1              | 5.49 | 5.89 | 5.03 |
| SNORD88C           | 5.49 | 5.84 | 5.10 |
| LTC4S              | 5.49 | 5.71 | 5.12 |
| POU5F1             | 5.49 | 5.86 | 5.21 |

|                           |      |      |      |
|---------------------------|------|------|------|
| <i>PKN3</i>               | 5.49 | 6.10 | 4.93 |
| <i>GDI1</i>               | 5.49 | 5.91 | 5.21 |
| <i>FCN3</i>               | 5.49 | 5.98 | 4.95 |
| <i>ATG12</i>              | 5.49 | 5.92 | 5.08 |
| <i>ZFYVE21</i>            | 5.49 | 5.69 | 5.07 |
| <i>NEDD1</i>              | 5.49 | 6.01 | 4.63 |
| <i>CROCC</i>              | 5.49 | 5.79 | 5.03 |
| <i>FLI1-AS1</i>           | 5.49 | 5.97 | 5.20 |
| <i>CCDC74B</i>            | 5.49 | 6.32 | 5.09 |
| <i>LRRC56</i>             | 5.49 | 5.68 | 5.29 |
| <i>CAMTA1</i>             | 5.49 | 5.80 | 5.15 |
| <i>SORD</i>               | 5.49 | 5.98 | 4.90 |
| <i>DPH1</i>               | 5.49 | 5.77 | 5.13 |
| <i>OTTHUMG00000152619</i> | 5.49 | 5.93 | 5.18 |
| <i>SCN4B</i>              | 5.49 | 5.77 | 5.00 |
| <i>LRIF1</i>              | 5.49 | 5.83 | 4.86 |
| <i>KIF4A</i>              | 5.49 | 5.91 | 5.15 |
| <i>USP42</i>              | 5.49 | 5.84 | 5.06 |
| <i>DCAF15</i>             | 5.49 | 5.88 | 5.07 |
| <i>GZMH</i>               | 5.49 | 6.42 | 5.15 |
| <i>OR5E1P</i>             | 5.49 | 6.24 | 4.54 |
| <i>L3MBTL2</i>            | 5.48 | 5.82 | 5.13 |
| <i>FBXO25</i>             | 5.48 | 6.01 | 5.10 |
| <i>SRA1</i>               | 5.48 | 5.89 | 4.75 |
| <i>BRI3BP</i>             | 5.48 | 5.90 | 4.78 |
| <i>LOC100287628</i>       | 5.48 | 6.16 | 4.79 |
| <i>TBC1D12</i>            | 5.48 | 5.74 | 4.95 |
| <i>LOC100131067</i>       | 5.48 | 5.72 | 5.15 |
| <i>ADCY2</i>              | 5.48 | 6.25 | 4.78 |
| <i>TMLHE-AS1</i>          | 5.48 | 6.11 | 5.16 |
| <i>FAM96A</i>             | 5.48 | 6.08 | 4.75 |
| <i>NSFP1</i>              | 5.48 | 6.28 | 4.41 |
| <i>FAM138B</i>            | 5.48 | 6.15 | 4.81 |
| <i>STX5</i>               | 5.48 | 5.83 | 5.17 |
| <i>CD5</i>                | 5.48 | 5.97 | 5.03 |
| <i>GRIPAP1</i>            | 5.48 | 5.79 | 5.14 |
| <i>ZDHHC17</i>            | 5.48 | 5.88 | 5.11 |
| <i>PABPC1</i>             | 5.48 | 5.96 | 5.01 |
| <i>LOC613038</i>          | 5.48 | 5.68 | 5.17 |
| <i>CRTC3</i>              | 5.48 | 5.79 | 5.15 |
| <i>GALNT10</i>            | 5.48 | 5.85 | 5.09 |
| <i>CREB3L1</i>            | 5.48 | 6.08 | 5.04 |
| <i>STRADA</i>             | 5.48 | 5.95 | 5.07 |
| <i>CIR1</i>               | 5.48 | 5.82 | 4.95 |
| <i>MYNN</i>               | 5.48 | 6.06 | 4.94 |
| <i>SELV</i>               | 5.48 | 5.91 | 4.96 |
| <i>C16orf45</i>           | 5.48 | 5.66 | 5.26 |
| <i>MGC57346</i>           | 5.48 | 5.76 | 5.22 |
| <i>STK24</i>              | 5.48 | 5.91 | 5.20 |

|                    |      |      |      |
|--------------------|------|------|------|
| PLEKHJ1            | 5.48 | 5.74 | 5.23 |
| ANGPT4             | 5.48 | 5.96 | 5.10 |
| SLC16A2            | 5.48 | 6.04 | 5.04 |
| HIST2H2BF          | 5.48 | 5.94 | 5.01 |
| HGS                | 5.48 | 5.86 | 5.30 |
| FLT1               | 5.48 | 6.00 | 4.75 |
| HES1               | 5.48 | 5.85 | 5.06 |
| OTTHUMG00000032141 | 5.48 | 6.43 | 4.77 |
| HLA-DRB6           | 5.48 | 6.08 | 5.20 |
| MIR211             | 5.48 | 5.81 | 5.10 |
| FAM209B            | 5.48 | 5.95 | 5.09 |
| C5AR2              | 5.48 | 5.92 | 4.90 |
| DFNA5              | 5.48 | 5.84 | 5.19 |
| NRF1               | 5.48 | 5.85 | 5.15 |
| NSUN5              | 5.48 | 5.76 | 5.00 |
| MIR596             | 5.48 | 5.94 | 4.94 |
| DBN1               | 5.48 | 6.07 | 5.06 |
| SAYSD1             | 5.48 | 6.03 | 5.09 |
| CUL9               | 5.48 | 5.65 | 5.23 |
| OBFC1              | 5.48 | 5.87 | 4.82 |
| ZKSCAN3            | 5.48 | 5.69 | 5.20 |
| BATF3              | 5.48 | 5.77 | 5.19 |
| FHOD3              | 5.48 | 6.10 | 5.12 |
| PDGFD              | 5.48 | 6.28 | 4.59 |
| MRGPRD             | 5.48 | 5.96 | 5.17 |
| MIR1247            | 5.48 | 5.99 | 5.09 |
| FAM57B             | 5.48 | 5.97 | 5.03 |
| MAPK8IP3           | 5.48 | 5.99 | 5.05 |
| MIR548AN           | 5.48 | 6.30 | 4.68 |
| AAR2               | 5.48 | 5.71 | 4.92 |
| WDR86-AS1          | 5.48 | 5.95 | 5.00 |
| GATAD2A            | 5.48 | 5.67 | 5.19 |
| CNOT10             | 5.48 | 6.04 | 5.17 |
| GUSBP1             | 5.48 | 6.04 | 4.97 |
| TMEM74B            | 5.48 | 5.76 | 4.80 |
| TTC23              | 5.48 | 5.99 | 5.18 |
| MIR221             | 5.48 | 6.54 | 4.79 |
| TUBGCP4            | 5.48 | 6.05 | 4.97 |
| PPIE               | 5.48 | 5.94 | 4.66 |
| OTTHUMG00000151363 | 5.48 | 6.21 | 4.99 |
| PRKCD              | 5.48 | 5.98 | 5.15 |
| RAB4A              | 5.48 | 5.94 | 4.82 |
| RSG1               | 5.48 | 5.91 | 5.15 |
| ARHGAP11B          | 5.48 | 5.85 | 4.98 |
| DTYMK              | 5.48 | 5.99 | 4.99 |
| OTTHUMG00000172590 | 5.48 | 6.45 | 4.23 |
| RFTN1              | 5.48 | 5.74 | 4.91 |
| TMEM176A           | 5.47 | 6.01 | 5.17 |
| MKNK1              | 5.47 | 6.12 | 5.01 |

|                    |      |      |      |
|--------------------|------|------|------|
| ABHD8              | 5.47 | 5.73 | 5.20 |
| KIAA0226L          | 5.47 | 6.56 | 4.57 |
| LOC100506801       | 5.47 | 5.77 | 5.13 |
| ARHGAP29           | 5.47 | 5.98 | 5.09 |
| OTTHUMG00000016875 | 5.47 | 6.63 | 4.61 |
| CCNT2              | 5.47 | 5.88 | 4.67 |
| LOC642929          | 5.47 | 6.65 | 5.07 |
| EZH2               | 5.47 | 5.92 | 4.82 |
| ADM5               | 5.47 | 5.76 | 5.01 |
| OTTHUMG00000169290 | 5.47 | 5.80 | 4.87 |
| PPP2R5D            | 5.47 | 6.00 | 4.94 |
| C17orf99           | 5.47 | 5.90 | 4.89 |
| SUGP1              | 5.47 | 5.68 | 5.05 |
| NLE1               | 5.47 | 5.88 | 5.10 |
| DDT                | 5.47 | 5.69 | 5.23 |
| ARHGEF17           | 5.47 | 5.84 | 5.10 |
| TMEM11             | 5.47 | 5.91 | 4.85 |
| SYNE1-AS1          | 5.47 | 5.71 | 5.15 |
| WDR74              | 5.47 | 5.80 | 4.90 |
| MUC12              | 5.47 | 5.77 | 5.05 |
| ZNF445             | 5.47 | 5.69 | 5.18 |
| C14orf159          | 5.47 | 5.86 | 5.03 |
| OTTHUMG00000166666 | 5.47 | 5.78 | 4.81 |
| GAST               | 5.47 | 6.05 | 5.17 |
| GAS6-AS1           | 5.47 | 5.71 | 5.28 |
| P2RX1              | 5.47 | 5.83 | 4.83 |
| SLC7A5             | 5.47 | 6.71 | 4.90 |
| OR2L8              | 5.47 | 6.79 | 4.26 |
| TRMT6              | 5.47 | 5.81 | 4.88 |
| ANKS3              | 5.47 | 5.66 | 5.21 |
| POP4               | 5.47 | 5.80 | 4.86 |
| PTGES              | 5.47 | 7.09 | 4.43 |
| COL5A3             | 5.47 | 5.77 | 5.08 |
| DUSP6              | 5.47 | 5.87 | 4.94 |
| NUDCD2             | 5.47 | 6.03 | 4.85 |
| SLC26A4            | 5.47 | 6.05 | 5.04 |
| ARX                | 5.47 | 5.64 | 5.21 |
| PNPLA4             | 5.47 | 5.89 | 5.21 |
| LOC100132891       | 5.47 | 5.93 | 5.07 |
| ARL15              | 5.47 | 5.98 | 4.79 |
| OTTHUMG00000163994 | 5.47 | 5.77 | 5.05 |
| INF2               | 5.47 | 5.62 | 5.25 |
| GPKOW              | 5.47 | 5.75 | 5.03 |
| TRAP1              | 5.47 | 5.80 | 5.04 |
| TMEM55B            | 5.47 | 5.83 | 5.27 |
| STX1A              | 5.47 | 5.85 | 5.00 |
| IMPAD1             | 5.47 | 6.18 | 4.53 |
| FABP4              | 5.47 | 7.78 | 2.69 |
| VWA1               | 5.47 | 5.71 | 5.22 |

|              |      |      |      |
|--------------|------|------|------|
| TRAPPC12-AS1 | 5.47 | 5.84 | 4.89 |
| GJA5         | 5.47 | 5.87 | 4.78 |
| MIR1468      | 5.47 | 6.30 | 4.99 |
| CEACAM19     | 5.47 | 5.85 | 4.99 |
| HSPB11       | 5.47 | 6.11 | 4.35 |
| TUBGCP3      | 5.47 | 5.93 | 4.90 |
| RAB26        | 5.47 | 5.72 | 5.17 |
| TMEM180      | 5.47 | 5.68 | 5.28 |
| MKL1         | 5.47 | 5.78 | 5.19 |
| MXI1         | 5.47 | 5.92 | 5.22 |
| BANP         | 5.47 | 5.81 | 4.94 |
| COG8         | 5.47 | 5.85 | 4.85 |
| PPM1L        | 5.47 | 5.78 | 5.15 |
| SGSH         | 5.47 | 5.66 | 5.05 |
| RNA5SP420    | 5.47 | 6.12 | 5.08 |
| ARID3A       | 5.47 | 5.83 | 5.06 |
| TDP1         | 5.47 | 5.73 | 5.25 |
| ANKZF1       | 5.47 | 5.88 | 5.09 |
| MRPL30       | 5.47 | 5.80 | 4.85 |
| CLASP2       | 5.47 | 5.81 | 5.01 |
| CRNN         | 5.47 | 6.14 | 4.93 |
| ZNF317       | 5.47 | 5.82 | 5.12 |
| MTRNR2L6     | 5.47 | 6.05 | 5.09 |
| RPP30        | 5.47 | 5.88 | 4.98 |
| CEP104       | 5.47 | 6.03 | 4.99 |
| ACSM5        | 5.47 | 5.80 | 4.99 |
| PTRH2        | 5.47 | 5.95 | 4.93 |
| C21orf91     | 5.47 | 5.86 | 5.16 |
| MGC40069     | 5.47 | 6.01 | 4.65 |
| PIGQ         | 5.47 | 5.70 | 5.27 |
| KIAA1456     | 5.47 | 5.87 | 5.05 |
| GALNT11      | 5.47 | 5.78 | 4.86 |
| LEPREL2      | 5.47 | 5.92 | 5.12 |
| NCOA6        | 5.47 | 5.76 | 5.06 |
| OR2M5        | 5.47 | 6.19 | 4.93 |
| ZDHHC14      | 5.47 | 5.79 | 5.26 |
| PAQR4        | 5.47 | 6.01 | 5.01 |
| OSGIN1       | 5.47 | 5.85 | 4.99 |
| ITIH5        | 5.47 | 5.75 | 4.77 |
| UTP20        | 5.47 | 5.84 | 5.12 |
| RNA5SP191    | 5.47 | 6.51 | 4.00 |
| GATSL3       | 5.46 | 5.80 | 5.11 |
| NECAP1       | 5.46 | 5.69 | 5.11 |
| MRGPRX1      | 5.46 | 5.81 | 5.02 |
| URM1         | 5.46 | 5.92 | 5.19 |
| CCL19        | 5.46 | 6.42 | 4.84 |
| BOD1         | 5.46 | 5.79 | 4.84 |
| BTBD10       | 5.46 | 5.87 | 5.05 |
| NDUFV1       | 5.46 | 5.71 | 5.11 |



|                    |      |      |      |
|--------------------|------|------|------|
| TMEM25             | 5.46 | 5.79 | 5.16 |
| OR11H1             | 5.46 | 7.02 | 4.38 |
| PKP4               | 5.46 | 5.76 | 5.12 |
| MEX3A              | 5.46 | 5.73 | 5.04 |
| KATNBL1            | 5.46 | 5.65 | 5.02 |
| HIST1H2AE          | 5.46 | 7.03 | 4.29 |
| METTL25            | 5.46 | 5.91 | 4.86 |
| ZNF705E            | 5.46 | 6.15 | 4.86 |
| ZFHX4              | 5.46 | 6.09 | 5.09 |
| NAAA               | 5.46 | 5.86 | 5.13 |
| METTL8             | 5.46 | 5.71 | 5.10 |
| VAC14              | 5.46 | 5.66 | 5.05 |
| DNAJC25            | 5.46 | 5.86 | 5.04 |
| ZBTB24             | 5.46 | 5.68 | 4.86 |
| CEBPB              | 5.46 | 5.74 | 5.27 |
| LGALS3BP           | 5.46 | 5.96 | 4.72 |
| GUF1               | 5.46 | 5.88 | 4.98 |
| MAFA               | 5.46 | 5.87 | 4.97 |
| LNX1-AS1           | 5.46 | 6.02 | 4.99 |
| SNORD121B          | 5.46 | 6.04 | 5.18 |
| NIPSNAP1           | 5.46 | 5.63 | 5.19 |
| LOC400590          | 5.46 | 6.02 | 4.88 |
| OTTHUMG00000018077 | 5.46 | 5.85 | 5.01 |
| BTG3               | 5.46 | 5.90 | 4.85 |
| KCP                | 5.46 | 5.82 | 5.05 |
| MIR106B            | 5.46 | 5.65 | 5.12 |
| CDRT15             | 5.46 | 5.95 | 4.84 |
| THAP7              | 5.46 | 5.76 | 4.98 |
| LOC100129476       | 5.46 | 5.76 | 5.24 |
| TJAP1              | 5.46 | 5.71 | 5.25 |
| LOC442132          | 5.46 | 6.39 | 4.48 |
| OTTHUMG00000002201 | 5.46 | 6.08 | 4.93 |
| WDR18              | 5.46 | 5.76 | 5.07 |
| CAPN3              | 5.46 | 6.24 | 4.33 |
| SNORA14A           | 5.46 | 7.80 | 3.13 |
| FLJ41200           | 5.46 | 5.86 | 5.11 |
| OTTHUMG00000161608 | 5.46 | 6.11 | 4.47 |
| DCTPP1             | 5.46 | 5.89 | 5.09 |
| SV2B               | 5.46 | 5.98 | 4.82 |
| PAK1IP1            | 5.46 | 6.15 | 4.34 |
| SGK494             | 5.46 | 5.66 | 5.31 |
| AGPAT4-IT1         | 5.46 | 5.82 | 4.99 |
| TMEM98             | 5.46 | 5.73 | 4.77 |
| OTTHUMG00000168255 | 5.46 | 5.82 | 5.15 |
| KRTAP10-3          | 5.46 | 5.95 | 4.66 |
| ZBTB38             | 5.46 | 6.12 | 4.86 |
| NIPA2              | 5.46 | 5.74 | 5.26 |
| ZC3H3              | 5.46 | 5.73 | 5.08 |
| INSR               | 5.46 | 5.87 | 4.98 |

|                    |      |      |      |
|--------------------|------|------|------|
| MCOLN2             | 5.46 | 6.16 | 4.79 |
| OTTHUMG00000014663 | 5.46 | 5.70 | 5.23 |
| IGHV4-59           | 5.46 | 6.19 | 4.88 |
| CXorf61            | 5.46 | 6.23 | 4.88 |
| TMEM104            | 5.46 | 6.04 | 4.83 |
| CGB1               | 5.46 | 6.12 | 4.60 |
| EP400NL            | 5.46 | 5.88 | 5.01 |
| GRINA              | 5.46 | 6.07 | 5.07 |
| DCUN1D3            | 5.46 | 5.85 | 5.16 |
| FBLN7              | 5.46 | 5.98 | 4.74 |
| SEC16B             | 5.46 | 5.64 | 5.17 |
| MBD6               | 5.46 | 5.70 | 5.25 |
| PPP2R5A            | 5.46 | 5.67 | 5.06 |
| IL9R               | 5.46 | 5.99 | 4.97 |
| GLCE               | 5.46 | 5.95 | 4.68 |
| GGA2               | 5.46 | 5.78 | 4.81 |
| CNTRL              | 5.46 | 5.74 | 5.03 |
| ZC2HC1A            | 5.46 | 6.11 | 4.70 |
| ZNF142             | 5.46 | 5.82 | 5.01 |
| PRC1-AS1           | 5.46 | 6.24 | 4.92 |
| PLOD3              | 5.46 | 5.98 | 5.02 |
| LOC100505736       | 5.46 | 6.03 | 5.06 |
| TRIM40             | 5.46 | 5.80 | 5.03 |
| GIPC1              | 5.45 | 5.97 | 5.04 |
| KIF27              | 5.45 | 5.75 | 5.17 |
| CDK16              | 5.45 | 5.97 | 4.98 |
| MALSU1             | 5.45 | 5.76 | 5.16 |
| UNG                | 5.45 | 5.84 | 5.07 |
| ARMS2              | 5.45 | 5.91 | 4.95 |
| ELMO1-AS1          | 5.45 | 6.05 | 4.79 |
| ZNF791             | 5.45 | 5.84 | 5.09 |
| RGL4               | 5.45 | 5.81 | 5.02 |
| LOC100130700       | 5.45 | 6.00 | 5.15 |
| PIGC               | 5.45 | 5.90 | 4.63 |
| CHCHD5             | 5.45 | 5.61 | 5.24 |
| NFKBIB             | 5.45 | 5.62 | 5.19 |
| KCNQ1DN            | 5.45 | 5.76 | 5.21 |
| WIPF2              | 5.45 | 6.04 | 4.95 |
| BACE2              | 5.45 | 6.08 | 4.87 |
| LOC100996485       | 5.45 | 5.95 | 4.80 |
| SORBS2             | 5.45 | 6.04 | 4.56 |
| SORBS3             | 5.45 | 5.75 | 5.03 |
| TSEN54             | 5.45 | 5.73 | 5.22 |
| LOC100287036       | 5.45 | 5.84 | 4.87 |
| LOC728763          | 5.45 | 5.77 | 5.10 |
| FRK                | 5.45 | 6.17 | 4.91 |
| LOC100133445       | 5.45 | 6.06 | 4.68 |
| NUTM2A-AS1         | 5.45 | 5.99 | 5.06 |
| NGLY1              | 5.45 | 5.85 | 4.59 |

|                    |      |      |      |
|--------------------|------|------|------|
| H2AFX              | 5.45 | 6.08 | 4.90 |
| USP5               | 5.45 | 5.93 | 4.84 |
| GPR18              | 5.45 | 5.74 | 5.23 |
| TNFRSF13B          | 5.45 | 5.77 | 4.69 |
| ZNF3               | 5.45 | 5.93 | 4.95 |
| VAMP4              | 5.45 | 5.86 | 4.90 |
| C1QTNF5            | 5.45 | 5.67 | 5.24 |
| LINC00665          | 5.45 | 5.80 | 5.03 |
| POLK               | 5.45 | 6.03 | 4.94 |
| SMURF1             | 5.45 | 5.82 | 4.96 |
| AKT1               | 5.45 | 5.92 | 5.25 |
| SNX12              | 5.45 | 5.95 | 4.33 |
| MMP16              | 5.45 | 6.10 | 4.40 |
| GSTO1              | 5.45 | 5.98 | 4.97 |
| LOC100506544       | 5.45 | 5.75 | 5.26 |
| COL26A1            | 5.45 | 5.66 | 5.33 |
| OTOP2              | 5.45 | 6.01 | 5.10 |
| TFRC               | 5.45 | 6.18 | 4.51 |
| ARHGAP5-AS1        | 5.45 | 5.79 | 5.20 |
| OTTHUMG00000158558 | 5.45 | 5.86 | 5.12 |
| D2HGDH             | 5.45 | 5.78 | 5.02 |
| ZNF580             | 5.45 | 5.86 | 5.07 |
| FDFT1              | 5.45 | 5.70 | 5.19 |
| KCTD18             | 5.45 | 5.91 | 4.87 |
| NOG                | 5.45 | 5.76 | 4.75 |
| CCDC142            | 5.45 | 5.64 | 5.17 |
| MIRLET7C           | 5.45 | 6.10 | 3.89 |
| CACNA1I            | 5.45 | 5.83 | 5.01 |
| KLHL7              | 5.45 | 5.86 | 4.98 |
| SHC3               | 5.45 | 5.79 | 4.95 |
| SLC7A10            | 5.45 | 5.94 | 5.04 |
| UBIAD1             | 5.45 | 5.80 | 5.08 |
| RAPGEF1            | 5.45 | 5.81 | 4.53 |
| NCDN               | 5.45 | 5.63 | 5.16 |
| MPP1               | 5.45 | 6.15 | 5.07 |
| FAM133CP           | 5.45 | 5.87 | 4.84 |
| PHF23              | 5.45 | 5.87 | 4.91 |
| CGREF1             | 5.45 | 5.80 | 4.98 |
| TMUB1              | 5.45 | 5.65 | 5.14 |
| WDR78              | 5.45 | 5.92 | 4.89 |
| MECP2              | 5.45 | 5.74 | 4.73 |
| RBMS3-AS2          | 5.45 | 5.73 | 4.95 |
| VCX3A              | 5.45 | 5.72 | 5.07 |
| FOXN4              | 5.45 | 5.72 | 5.18 |
| SERPINA6           | 5.45 | 6.32 | 4.42 |
| HIST2H2BE          | 5.45 | 6.10 | 4.86 |
| CT47A10            | 5.45 | 5.78 | 5.13 |
| LCP2               | 5.45 | 6.23 | 4.75 |
| KLHDC3             | 5.45 | 5.87 | 5.12 |

|                    |      |      |      |
|--------------------|------|------|------|
| RNA5SP322          | 5.45 | 6.15 | 4.81 |
| CAMKMT             | 5.45 | 5.82 | 5.03 |
| CD7                | 5.45 | 5.87 | 5.14 |
| OR51B4             | 5.45 | 6.07 | 5.17 |
| LY6H               | 5.45 | 5.87 | 5.02 |
| DSP                | 5.45 | 5.67 | 4.93 |
| C4orf27            | 5.45 | 6.05 | 4.87 |
| LEMD3              | 5.45 | 5.97 | 4.78 |
| XCR1               | 5.45 | 5.92 | 4.94 |
| RRP1               | 5.44 | 5.74 | 5.08 |
| MBNL1-AS1          | 5.44 | 6.03 | 4.99 |
| EIF4E3             | 5.44 | 5.92 | 5.15 |
| PEX11G             | 5.44 | 5.77 | 5.09 |
| OTTHUMG00000164478 | 5.44 | 5.80 | 5.08 |
| C11orf68           | 5.44 | 5.69 | 5.15 |
| TRIP10             | 5.44 | 6.01 | 5.08 |
| FAM66C             | 5.44 | 5.80 | 4.92 |
| ZBTB46             | 5.44 | 6.00 | 4.92 |
| ZNF518A            | 5.44 | 5.92 | 4.93 |
| RFXANK             | 5.44 | 5.67 | 5.08 |
| SEMA4G             | 5.44 | 5.81 | 5.14 |
| SNRPA1             | 5.44 | 5.71 | 4.85 |
| PSPH               | 5.44 | 5.59 | 5.27 |
| FLJ33630           | 5.44 | 6.05 | 4.93 |
| CHRM4              | 5.44 | 5.71 | 5.26 |
| GPSM3              | 5.44 | 5.85 | 5.01 |
| LINC00701          | 5.44 | 5.79 | 4.93 |
| OTTHUMG00000012337 | 5.44 | 5.74 | 5.01 |
| MROH8              | 5.44 | 5.80 | 4.96 |
| DPF1               | 5.44 | 5.78 | 5.19 |
| CUEDC2             | 5.44 | 5.89 | 5.13 |
| SLC9A1             | 5.44 | 5.85 | 4.98 |
| LOC100506191       | 5.44 | 5.73 | 5.07 |
| TSC22D1-AS1        | 5.44 | 5.71 | 5.17 |
| GALNT7             | 5.44 | 6.48 | 4.51 |
| CABLES1            | 5.44 | 5.87 | 5.01 |
| GSX2               | 5.44 | 5.65 | 5.07 |
| ZNF512B            | 5.44 | 5.84 | 5.11 |
| QRSL1              | 5.44 | 5.77 | 5.07 |
| BOLA1              | 5.44 | 5.83 | 5.17 |
| IMPDH1             | 5.44 | 5.79 | 4.94 |
| GATA5              | 5.44 | 5.89 | 4.84 |
| PRAMEF24P          | 5.44 | 5.79 | 4.82 |
| VRK3               | 5.44 | 5.77 | 5.15 |
| OTTHUMG00000172506 | 5.44 | 5.88 | 5.05 |
| NAGA               | 5.44 | 5.91 | 4.60 |
| DEF8               | 5.44 | 5.67 | 5.22 |
| VLDLR              | 5.44 | 6.47 | 4.54 |
| NPW                | 5.44 | 5.71 | 4.98 |

|                    |      |      |      |
|--------------------|------|------|------|
| RPL13P5            | 5.44 | 5.77 | 4.89 |
| SHANK2             | 5.44 | 5.77 | 4.97 |
| C3orf58            | 5.44 | 5.67 | 4.59 |
| HSBP1L1            | 5.44 | 5.98 | 5.03 |
| TPMT               | 5.44 | 6.30 | 4.79 |
| CT47A1             | 5.44 | 5.76 | 5.17 |
| CAB39L             | 5.44 | 5.96 | 4.85 |
| ARHGAP4            | 5.44 | 5.64 | 5.28 |
| BUD13              | 5.44 | 5.77 | 5.07 |
| GPR179             | 5.44 | 5.78 | 4.80 |
| DAAM1              | 5.44 | 6.02 | 5.09 |
| ESAM               | 5.44 | 6.03 | 4.63 |
| GBGT1              | 5.44 | 5.68 | 5.23 |
| PLCD1              | 5.44 | 5.75 | 4.99 |
| PLXNA2             | 5.44 | 6.26 | 4.55 |
| NDUFS8             | 5.44 | 5.79 | 5.10 |
| TNNC1              | 5.44 | 6.24 | 5.08 |
| SYNGR1             | 5.44 | 5.59 | 5.11 |
| NDFIP2             | 5.44 | 5.98 | 4.54 |
| TMEM97             | 5.44 | 5.79 | 5.16 |
| MMP11              | 5.44 | 5.73 | 5.18 |
| HMGB1              | 5.44 | 5.79 | 5.09 |
| MYOC               | 5.44 | 6.88 | 4.22 |
| NAT6               | 5.44 | 5.72 | 5.28 |
| PWWP2A             | 5.44 | 5.62 | 5.25 |
| STK3               | 5.44 | 5.90 | 5.14 |
| C10orf12           | 5.44 | 5.89 | 4.99 |
| AGAP11             | 5.44 | 6.27 | 4.89 |
| GGT1               | 5.44 | 5.61 | 5.21 |
| CSRNP2             | 5.44 | 5.59 | 5.17 |
| XRCC1              | 5.44 | 5.78 | 5.09 |
| NDST1              | 5.44 | 5.81 | 5.10 |
| PROSER2            | 5.44 | 5.74 | 5.16 |
| TSPYL1             | 5.44 | 5.84 | 5.06 |
| NTHL1              | 5.44 | 5.82 | 5.08 |
| PDCD2              | 5.44 | 5.93 | 4.94 |
| CAPS               | 5.44 | 5.83 | 4.94 |
| ZNF605             | 5.44 | 5.87 | 5.02 |
| OTTHUMG00000041227 | 5.44 | 6.18 | 4.91 |
| NPL                | 5.44 | 6.38 | 4.83 |
| ZNF76              | 5.44 | 5.62 | 5.13 |
| WIPI2              | 5.44 | 5.64 | 4.71 |
| MCM3AP-AS1         | 5.44 | 5.68 | 5.02 |
| CCDC57             | 5.44 | 5.86 | 4.98 |
| HIRA               | 5.44 | 5.78 | 5.05 |
| CD79A              | 5.44 | 5.87 | 5.18 |
| GUCD1              | 5.44 | 5.85 | 5.09 |
| LINC00337          | 5.44 | 5.59 | 5.25 |
| MRT04              | 5.44 | 6.20 | 5.11 |

|                    |      |      |      |
|--------------------|------|------|------|
| DDX10              | 5.44 | 5.63 | 5.00 |
| ADD3-AS1           | 5.43 | 5.76 | 5.18 |
| ZNF528             | 5.43 | 5.62 | 4.86 |
| CTPS2              | 5.43 | 5.68 | 4.91 |
| INO80              | 5.43 | 5.74 | 5.14 |
| PPM1B              | 5.43 | 5.88 | 4.63 |
| SIGIRR             | 5.43 | 5.90 | 4.98 |
| AVIL               | 5.43 | 5.74 | 5.04 |
| PIP4K2A            | 5.43 | 5.90 | 5.02 |
| RPL34              | 5.43 | 5.58 | 5.09 |
| GSPT1              | 5.43 | 5.91 | 4.47 |
| TBX10              | 5.43 | 5.81 | 5.08 |
| TWIST1             | 5.43 | 6.18 | 4.50 |
| MAN2C1             | 5.43 | 5.78 | 5.13 |
| PHKA2              | 5.43 | 5.88 | 4.75 |
| RNF130             | 5.43 | 5.78 | 5.06 |
| LOC100129427       | 5.43 | 5.75 | 5.19 |
| PRKAA2             | 5.43 | 5.76 | 5.12 |
| DMBX1              | 5.43 | 5.58 | 5.13 |
| ZNF90              | 5.43 | 5.76 | 5.03 |
| THAP4              | 5.43 | 5.78 | 5.08 |
| RBM12B-AS2         | 5.43 | 5.90 | 4.94 |
| DBP                | 5.43 | 6.12 | 4.88 |
| FOXA2              | 5.43 | 5.87 | 5.09 |
| APOM               | 5.43 | 5.71 | 5.14 |
| CCDC74B-AS1        | 5.43 | 5.89 | 5.19 |
| TRIM72             | 5.43 | 5.73 | 5.14 |
| CSPG4P1Y           | 5.43 | 5.64 | 5.22 |
| TLX2               | 5.43 | 6.02 | 5.09 |
| SNORA6             | 5.43 | 5.78 | 4.88 |
| DNAJC16            | 5.43 | 5.78 | 4.61 |
| LOC100507156       | 5.43 | 6.37 | 4.44 |
| DND1               | 5.43 | 5.74 | 4.99 |
| ZNF500             | 5.43 | 6.09 | 4.87 |
| PPP1R15A           | 5.43 | 5.92 | 4.92 |
| SNHG6              | 5.43 | 5.68 | 5.09 |
| OTTHUMG00000169635 | 5.43 | 5.69 | 4.99 |
| CD52               | 5.43 | 6.20 | 4.77 |
| MYH10              | 5.43 | 6.17 | 4.70 |
| SRPK1              | 5.43 | 5.94 | 4.88 |
| PNMA6D             | 5.43 | 5.78 | 5.19 |
| TBC1D14            | 5.43 | 5.68 | 5.00 |
| ZBTB6              | 5.43 | 5.92 | 4.91 |
| SHPK               | 5.43 | 5.70 | 5.23 |
| MLH3               | 5.43 | 5.68 | 4.61 |
| CHMP6              | 5.43 | 5.74 | 5.00 |
| AGAP3              | 5.43 | 5.64 | 5.09 |
| LPPR2              | 5.43 | 5.62 | 5.22 |
| STAT5A             | 5.43 | 5.79 | 5.08 |

|                    |      |      |      |
|--------------------|------|------|------|
| OTTHUMG00000156019 | 5.43 | 5.77 | 5.03 |
| TRAPPC8            | 5.43 | 6.03 | 4.57 |
| CBFA2T2            | 5.43 | 5.85 | 5.15 |
| DLC1               | 5.43 | 5.96 | 4.55 |
| FAM117B            | 5.43 | 5.68 | 5.18 |
| GRM4               | 5.43 | 5.83 | 5.17 |
| BRWD1-IT2          | 5.43 | 5.80 | 5.06 |
| TSMF               | 5.43 | 6.05 | 5.04 |
| HEATR8-TTC4        | 5.43 | 5.52 | 5.28 |
| SSTR2              | 5.43 | 6.22 | 4.46 |
| LINC00672          | 5.43 | 5.90 | 5.14 |
| HACE1              | 5.43 | 6.04 | 4.88 |
| MIR744             | 5.43 | 5.75 | 5.08 |
| POLR3GL            | 5.43 | 5.77 | 5.26 |
| MTUS1              | 5.43 | 5.87 | 4.45 |
| THOC5              | 5.43 | 5.82 | 4.85 |
| SPAG5-AS1          | 5.43 | 5.64 | 5.05 |
| C3orf37            | 5.43 | 5.80 | 4.59 |
| DERA               | 5.43 | 5.84 | 4.78 |
| IKBKB              | 5.43 | 5.65 | 4.88 |
| ISCA1              | 5.43 | 5.83 | 4.98 |
| ZNF484             | 5.43 | 5.79 | 4.94 |
| KCTD5              | 5.42 | 5.72 | 5.14 |
| GAS8               | 5.42 | 5.65 | 5.02 |
| TCHP               | 5.42 | 5.89 | 4.99 |
| SLC35E2            | 5.42 | 5.87 | 4.89 |
| EBP                | 5.42 | 5.72 | 4.83 |
| PNMA3              | 5.42 | 6.03 | 4.76 |
| SPRYD4             | 5.42 | 5.83 | 5.23 |
| HARS2              | 5.42 | 5.65 | 5.13 |
| PLA2G4A            | 5.42 | 6.05 | 4.46 |
| BRCC3              | 5.42 | 6.00 | 4.85 |
| NEK11              | 5.42 | 5.74 | 4.88 |
| ZNF814             | 5.42 | 5.98 | 4.70 |
| CD300LG            | 5.42 | 5.86 | 5.07 |
| SAMD8              | 5.42 | 5.88 | 4.70 |
| S100A3             | 5.42 | 5.95 | 4.88 |
| NCCRP1             | 5.42 | 5.96 | 4.96 |
| OTTHUMG00000176447 | 5.42 | 5.97 | 4.86 |
| CCT4               | 5.42 | 6.11 | 4.71 |
| PSMB8              | 5.42 | 5.92 | 5.16 |
| RRP9               | 5.42 | 5.81 | 5.06 |
| C2orf76            | 5.42 | 5.75 | 4.93 |
| MIRLET7A3          | 5.42 | 5.74 | 5.20 |
| ANKRD20A19P        | 5.42 | 5.73 | 4.69 |
| FADS6              | 5.42 | 5.93 | 4.85 |
| TRMU               | 5.42 | 5.72 | 4.91 |
| G2E3               | 5.42 | 5.91 | 5.02 |
| BEX5               | 5.42 | 6.09 | 4.68 |

|                    |      |      |      |
|--------------------|------|------|------|
| SNORA68            | 5.42 | 5.97 | 4.62 |
| ARNTL2             | 5.42 | 6.48 | 4.59 |
| C1orf35            | 5.42 | 5.72 | 5.16 |
| PRMT5              | 5.42 | 5.86 | 4.98 |
| TMEM223            | 5.42 | 5.78 | 5.20 |
| GIMAP5             | 5.42 | 6.05 | 4.73 |
| SZT2               | 5.42 | 5.62 | 5.21 |
| CASQ1              | 5.42 | 5.79 | 4.96 |
| COX5B              | 5.42 | 5.68 | 5.05 |
| ZNF331             | 5.42 | 5.94 | 5.01 |
| SAC3D1             | 5.42 | 5.63 | 5.20 |
| MRFAP1L1           | 5.42 | 5.65 | 5.18 |
| RNU6ATAC5P         | 5.42 | 6.18 | 4.59 |
| SPATA21            | 5.42 | 5.88 | 5.06 |
| C1orf192           | 5.42 | 6.09 | 4.95 |
| ZDHHC1             | 5.42 | 5.72 | 5.14 |
| CLDN9              | 5.42 | 5.81 | 4.91 |
| MIR3190            | 5.42 | 6.10 | 4.68 |
| ZBTB20-AS2         | 5.42 | 6.10 | 3.43 |
| NUP88              | 5.42 | 5.82 | 4.98 |
| CDRT15P1           | 5.42 | 6.15 | 4.61 |
| NKX1-1             | 5.42 | 5.99 | 5.17 |
| QDPR               | 5.42 | 5.82 | 5.13 |
| KCTD21             | 5.42 | 5.91 | 5.13 |
| WDR46              | 5.42 | 5.80 | 4.73 |
| PHRF1              | 5.42 | 5.69 | 5.08 |
| PGP                | 5.42 | 5.80 | 4.89 |
| TANK               | 5.42 | 5.89 | 4.92 |
| GALR2              | 5.42 | 6.13 | 5.00 |
| GART               | 5.42 | 5.75 | 4.95 |
| ELMSAN1            | 5.42 | 5.85 | 5.12 |
| SNF8               | 5.42 | 6.01 | 4.75 |
| HCN4               | 5.42 | 6.09 | 5.03 |
| DYRK2              | 5.42 | 5.75 | 5.12 |
| OR52R1             | 5.42 | 5.89 | 4.71 |
| HDAC6              | 5.42 | 5.73 | 5.08 |
| NRK                | 5.42 | 6.21 | 4.66 |
| RNMTL1             | 5.42 | 5.73 | 5.03 |
| C14orf132          | 5.42 | 5.86 | 4.93 |
| GAK                | 5.42 | 5.57 | 5.18 |
| ZRSR2              | 5.42 | 5.90 | 4.81 |
| OTTHUMG00000166314 | 5.42 | 5.95 | 4.90 |
| CACTIN             | 5.42 | 5.69 | 5.06 |
| SRGAP1             | 5.42 | 6.19 | 4.36 |
| ZDHHC8             | 5.42 | 5.80 | 4.64 |
| PKP3               | 5.42 | 5.75 | 5.01 |
| MAR2               | 5.42 | 5.91 | 5.10 |
| TCOF1              | 5.42 | 5.73 | 5.19 |
| NDUFB5             | 5.41 | 5.77 | 5.07 |



|              |      |      |      |
|--------------|------|------|------|
| SLC6A20      | 5.41 | 5.77 | 5.02 |
| OARD1        | 5.41 | 5.57 | 5.11 |
| PTER         | 5.41 | 5.68 | 5.15 |
| DANCR        | 5.41 | 5.82 | 5.02 |
| SKP2         | 5.41 | 5.82 | 4.98 |
| SSX8         | 5.41 | 6.02 | 4.47 |
| WDR92        | 5.41 | 5.70 | 5.11 |
| LOC730101    | 5.41 | 5.93 | 4.88 |
| C14orf80     | 5.41 | 5.68 | 5.15 |
| BHLHA15      | 5.41 | 6.06 | 4.82 |
| LOC100289061 | 5.41 | 5.83 | 5.06 |
| ZNF335       | 5.41 | 5.60 | 5.12 |
| C16orf95     | 5.41 | 5.82 | 5.14 |
| DRD5         | 5.41 | 5.82 | 5.18 |
| AR           | 5.41 | 5.90 | 4.87 |
| WNT11        | 5.41 | 5.95 | 5.16 |
| VPS13A-AS1   | 5.41 | 5.62 | 5.12 |
| TRAJ10       | 5.41 | 6.15 | 4.78 |
| GEMIN5       | 5.41 | 5.65 | 5.05 |
| RNA5SP133    | 5.41 | 5.70 | 5.12 |
| TMBIM6       | 5.41 | 5.85 | 4.84 |
| USP32        | 5.41 | 6.15 | 4.51 |
| ZMYM5        | 5.41 | 5.82 | 5.07 |
| PRSS1        | 5.41 | 6.28 | 4.70 |
| ZNF684       | 5.41 | 5.69 | 5.06 |
| DCP1B        | 5.41 | 5.69 | 4.48 |
| PRUNE        | 5.41 | 5.83 | 4.89 |
| ECI2         | 5.41 | 5.90 | 4.83 |
| FBXO32       | 5.41 | 5.96 | 4.91 |
| PKD1         | 5.41 | 5.92 | 4.95 |
| ZNF135       | 5.41 | 5.88 | 5.06 |
| ZNF213       | 5.41 | 5.60 | 5.16 |
| RNA5SP251    | 5.41 | 6.09 | 4.95 |
| TDRP         | 5.41 | 5.92 | 4.95 |
| LOC654433    | 5.41 | 5.89 | 4.51 |
| NUP50        | 5.41 | 5.79 | 5.05 |
| MOAP1        | 5.41 | 5.73 | 4.75 |
| DYNC1LI1     | 5.41 | 5.80 | 4.54 |
| PRR4         | 5.41 | 5.94 | 4.96 |
| FAM102A      | 5.41 | 6.03 | 4.76 |
| SFMBT1       | 5.41 | 5.69 | 4.96 |
| SNORD117     | 5.41 | 6.09 | 4.61 |
| CTAG1A       | 5.41 | 5.93 | 5.02 |
| GAS7         | 5.41 | 6.29 | 4.80 |
| DNAJC11      | 5.41 | 5.67 | 5.03 |
| PRRT3        | 5.41 | 6.04 | 4.87 |
| TREM2        | 5.41 | 6.46 | 4.48 |
| FAM172A      | 5.41 | 5.85 | 4.88 |
| URB1         | 5.41 | 5.89 | 5.12 |

|                |      |      |      |
|----------------|------|------|------|
| PPAPDC2        | 5.41 | 5.74 | 4.94 |
| GPR137         | 5.41 | 5.76 | 4.94 |
| ERCC2          | 5.41 | 5.71 | 4.80 |
| NUPL1          | 5.41 | 6.03 | 4.80 |
| ZNF385C        | 5.41 | 5.94 | 4.97 |
| HDHD3          | 5.41 | 5.74 | 5.14 |
| BRF1           | 5.41 | 5.77 | 5.09 |
| LINC00278      | 5.41 | 6.29 | 4.70 |
| ARHGEF25       | 5.41 | 5.68 | 4.98 |
| ZBTB40-IT1     | 5.41 | 5.83 | 4.92 |
| FABP5          | 5.41 | 5.72 | 5.26 |
| HECTD3         | 5.41 | 5.66 | 5.11 |
| RAB30          | 5.41 | 5.69 | 5.06 |
| DERL3          | 5.41 | 5.85 | 5.02 |
| CDC23          | 5.41 | 5.85 | 5.04 |
| C10orf54       | 5.41 | 5.67 | 5.15 |
| PRB2           | 5.41 | 5.93 | 4.65 |
| MED15          | 5.41 | 5.90 | 5.09 |
| PITHD1         | 5.41 | 6.14 | 4.53 |
| CD2BP2         | 5.41 | 5.82 | 4.97 |
| NSUN5P1        | 5.40 | 5.92 | 4.80 |
| UBE2E2         | 5.40 | 5.81 | 4.72 |
| PAAF1          | 5.40 | 5.61 | 5.10 |
| RAB11FIP4      | 5.40 | 5.91 | 5.01 |
| FAM207A        | 5.40 | 5.85 | 5.13 |
| LOC728724      | 5.40 | 5.61 | 5.18 |
| FOXP1-IT1      | 5.40 | 6.35 | 4.89 |
| OTUD7B         | 5.40 | 5.65 | 5.11 |
| TCEA2          | 5.40 | 5.90 | 4.95 |
| TNFRSF18       | 5.40 | 5.72 | 4.98 |
| LGALS9         | 5.40 | 5.78 | 5.07 |
| TTY6           | 5.40 | 5.95 | 4.61 |
| TMCC1          | 5.40 | 5.61 | 4.98 |
| SLC6A9         | 5.40 | 5.60 | 5.14 |
| MIR539         | 5.40 | 5.63 | 4.86 |
| MIR4289        | 5.40 | 5.97 | 4.77 |
| SLC25A35       | 5.40 | 5.89 | 5.04 |
| MIR3130-1      | 5.40 | 5.82 | 5.03 |
| ZNF598         | 5.40 | 5.82 | 5.16 |
| C10orf32-AS3MT | 5.40 | 5.70 | 4.98 |
| FRMD4A         | 5.40 | 5.82 | 4.97 |
| YY1AP1         | 5.40 | 5.90 | 4.85 |
| MIR642A        | 5.40 | 5.98 | 4.84 |
| MGMT           | 5.40 | 5.64 | 5.04 |
| MAP3K2         | 5.40 | 5.97 | 4.60 |
| CXorf40B       | 5.40 | 5.63 | 4.78 |
| ZNF561         | 5.40 | 5.77 | 4.88 |
| LRRC58         | 5.40 | 5.86 | 4.57 |
| TMEM9          | 5.40 | 5.76 | 4.85 |

|                |      |      |      |
|----------------|------|------|------|
| MSS51          | 5.40 | 5.79 | 5.14 |
| KCNK1          | 5.40 | 5.88 | 5.17 |
| ARHGEF40       | 5.40 | 5.85 | 4.99 |
| ZNF581         | 5.40 | 5.59 | 5.03 |
| PYROXD2        | 5.40 | 5.67 | 5.19 |
| PTGES3L-AARSD1 | 5.40 | 5.58 | 5.16 |
| EPS8L2         | 5.40 | 5.66 | 5.03 |
| LOC283214      | 5.40 | 5.76 | 4.93 |
| UBASH3B        | 5.40 | 5.76 | 4.85 |
| PRSS56         | 5.40 | 5.62 | 4.96 |
| ZNF48          | 5.40 | 5.69 | 4.82 |
| RAB5A          | 5.40 | 6.06 | 4.73 |
| FLJ42393       | 5.40 | 5.62 | 4.95 |
| SLC4A2         | 5.40 | 6.00 | 4.54 |
| FADS3          | 5.40 | 5.57 | 4.97 |
| AKAP1          | 5.40 | 5.64 | 5.17 |
| KIAA0196-AS1   | 5.40 | 5.66 | 5.10 |
| AIFM1          | 5.40 | 5.86 | 4.57 |
| RMND5A         | 5.40 | 5.81 | 4.89 |
| OPA3           | 5.40 | 5.74 | 4.90 |
| C15orf41       | 5.40 | 5.84 | 4.92 |
| KIAA1217       | 5.40 | 5.85 | 4.95 |
| C9orf85        | 5.40 | 5.81 | 4.91 |
| RAB11FIP5      | 5.40 | 5.51 | 5.16 |
| IFNL3          | 5.40 | 6.06 | 4.94 |
| TSHZ3          | 5.40 | 6.38 | 4.48 |
| LOC100506183   | 5.40 | 5.69 | 5.12 |
| ENHO           | 5.40 | 5.89 | 5.18 |
| MRPL23-AS1     | 5.40 | 5.83 | 4.94 |
| JPH4           | 5.40 | 6.05 | 5.07 |
| HOXD3          | 5.40 | 5.78 | 5.02 |
| ILDR1          | 5.40 | 5.96 | 4.96 |
| SUV420H2       | 5.40 | 5.75 | 5.12 |
| METTL6         | 5.40 | 6.09 | 4.68 |
| MEIS3          | 5.40 | 5.71 | 4.95 |
| PPAN-P2RY11    | 5.40 | 5.76 | 5.07 |
| C16orf74       | 5.40 | 5.65 | 5.11 |
| FAM179B        | 5.40 | 5.60 | 5.11 |
| CDA            | 5.40 | 6.05 | 4.52 |
| PODXL2         | 5.40 | 5.81 | 4.85 |
| AMPD2          | 5.40 | 5.66 | 4.94 |
| FYN            | 5.40 | 5.99 | 4.98 |
| MAP3K3         | 5.40 | 5.83 | 4.89 |
| CENPL          | 5.40 | 5.74 | 4.96 |
| LOC100507424   | 5.40 | 5.71 | 4.84 |
| GLIS1          | 5.40 | 5.70 | 5.06 |
| FAM50B         | 5.40 | 5.70 | 5.12 |
| ATOX1          | 5.40 | 5.55 | 5.05 |
| HIST1H2BL      | 5.40 | 5.96 | 5.13 |

|                    |      |      |      |
|--------------------|------|------|------|
| CABLES2            | 5.40 | 5.81 | 5.06 |
| SNORD113-9         | 5.40 | 6.90 | 4.23 |
| RNASEH1            | 5.39 | 5.57 | 5.02 |
| PODN               | 5.39 | 6.15 | 4.74 |
| C2orf47            | 5.39 | 5.73 | 4.64 |
| DGKH               | 5.39 | 5.71 | 4.90 |
| GLIS2              | 5.39 | 5.67 | 4.79 |
| FMNL1              | 5.39 | 5.97 | 4.92 |
| TMEM251            | 5.39 | 5.82 | 4.63 |
| FZD6               | 5.39 | 5.96 | 4.74 |
| MIR134             | 5.39 | 6.06 | 4.76 |
| LYPD5              | 5.39 | 5.68 | 5.05 |
| NIM1               | 5.39 | 5.81 | 4.68 |
| YBEY               | 5.39 | 5.83 | 4.60 |
| CYTH1              | 5.39 | 5.69 | 5.09 |
| OTTHUMG00000163609 | 5.39 | 6.00 | 4.91 |
| ID3                | 5.39 | 5.91 | 4.80 |
| MAGI3              | 5.39 | 5.71 | 4.85 |
| SNCAIP             | 5.39 | 5.73 | 4.77 |
| RAB36              | 5.39 | 5.58 | 5.22 |
| ABCA6              | 5.39 | 6.26 | 3.95 |
| ID2                | 5.39 | 5.72 | 4.61 |
| L3HYPDH            | 5.39 | 5.80 | 4.79 |
| GPR124             | 5.39 | 6.09 | 5.08 |
| ZNF862             | 5.39 | 5.66 | 5.07 |
| CLDN2              | 5.39 | 6.07 | 4.80 |
| DDX11L10           | 5.39 | 6.17 | 4.79 |
| SNORD92            | 5.39 | 5.67 | 4.87 |
| LOC100129785       | 5.39 | 5.76 | 4.73 |
| TEF                | 5.39 | 5.80 | 4.97 |
| ADORA2A-AS1        | 5.39 | 5.69 | 4.99 |
| UBL4B              | 5.39 | 5.94 | 4.80 |
| IL17B              | 5.39 | 5.84 | 4.85 |
| SNORD103A          | 5.39 | 5.79 | 4.72 |
| METAP1             | 5.39 | 5.83 | 4.97 |
| LINC00273          | 5.39 | 6.02 | 4.78 |
| RFX1               | 5.39 | 5.82 | 5.15 |
| TIAM1              | 5.39 | 5.83 | 4.96 |
| ZNF507             | 5.39 | 5.96 | 5.01 |
| FN3KRP             | 5.39 | 5.70 | 5.07 |
| SLC25A11           | 5.39 | 5.92 | 5.06 |
| OTTHUMG00000017162 | 5.39 | 6.13 | 4.98 |
| PHLDA2             | 5.39 | 6.17 | 4.78 |
| LOC100129550       | 5.39 | 5.76 | 4.98 |
| HMGB2              | 5.39 | 5.93 | 4.77 |
| SH2D4A             | 5.39 | 5.86 | 4.59 |
| PLVAP              | 5.39 | 6.50 | 4.51 |
| RPRML              | 5.39 | 5.94 | 4.93 |
| TLCD2              | 5.39 | 5.84 | 4.95 |

|                    |      |      |      |
|--------------------|------|------|------|
| MCM3               | 5.39 | 5.69 | 4.87 |
| OTTHUMG00000169629 | 5.39 | 5.83 | 4.98 |
| CACNA1C-AS2        | 5.39 | 5.58 | 5.18 |
| NOXA1              | 5.39 | 5.67 | 5.08 |
| WDR34              | 5.39 | 5.94 | 4.89 |
| KLHL33             | 5.39 | 5.76 | 5.08 |
| OXCT1              | 5.39 | 6.05 | 4.52 |
| ZBTB48             | 5.39 | 5.56 | 5.16 |
| IFT88              | 5.39 | 5.70 | 4.87 |
| WBSCR27            | 5.39 | 5.70 | 5.08 |
| NSUN4              | 5.39 | 5.68 | 4.93 |
| CELF2-AS1          | 5.39 | 5.73 | 4.99 |
| PPIEL              | 5.39 | 5.70 | 4.85 |
| RNA5SP84           | 5.39 | 5.93 | 5.14 |
| AAMP               | 5.39 | 5.75 | 5.07 |
| ZIK1               | 5.39 | 5.79 | 4.90 |
| ETNK2              | 5.39 | 5.81 | 5.00 |
| LINC00936          | 5.39 | 5.78 | 4.89 |
| NUDT13             | 5.39 | 5.85 | 4.76 |
| OTTHUMG00000150318 | 5.39 | 5.65 | 5.12 |
| OTTHUMG00000037425 | 5.39 | 6.29 | 4.75 |
| ITFG3              | 5.39 | 5.84 | 4.83 |
| THEMIS2            | 5.39 | 5.92 | 4.88 |
| MINOS1             | 5.39 | 5.76 | 5.01 |
| LOC100128482       | 5.39 | 5.84 | 5.10 |
| HDGFRP2            | 5.39 | 5.68 | 5.12 |
| APBB1IP            | 5.39 | 6.60 | 3.96 |
| RNF41              | 5.39 | 5.60 | 5.00 |
| MIR326             | 5.38 | 5.92 | 4.73 |
| C19orf38           | 5.38 | 5.78 | 5.09 |
| VGFB               | 5.38 | 5.66 | 5.00 |
| MTFR1              | 5.38 | 5.72 | 4.95 |
| LOC100507458       | 5.38 | 5.99 | 4.83 |
| KCNJ9              | 5.38 | 5.74 | 4.87 |
| ZNF7               | 5.38 | 5.69 | 5.04 |
| PAPPA-AS1          | 5.38 | 6.40 | 4.83 |
| MTM1               | 5.38 | 5.65 | 4.92 |
| TRIM66             | 5.38 | 5.77 | 4.70 |
| TUBD1              | 5.38 | 5.90 | 4.86 |
| OTTHUMG00000172125 | 5.38 | 5.59 | 5.06 |
| OTTHUMG00000009067 | 5.38 | 6.15 | 5.05 |
| CTAGE5             | 5.38 | 5.74 | 4.84 |
| KIAA1671           | 5.38 | 5.77 | 5.00 |
| DNAJA3             | 5.38 | 5.65 | 5.08 |
| BAG2               | 5.38 | 6.49 | 4.88 |
| LMNA               | 5.38 | 6.08 | 4.75 |
| NKX3-2             | 5.38 | 5.67 | 4.98 |
| FMN1               | 5.38 | 5.66 | 5.06 |
| HPN                | 5.38 | 5.71 | 5.15 |

|                    |      |      |      |
|--------------------|------|------|------|
| OTTHUMG00000162220 | 5.38 | 5.83 | 4.60 |
| GMEB2              | 5.38 | 5.68 | 5.23 |
| AKT1S1             | 5.38 | 5.53 | 5.17 |
| ZNF586             | 5.38 | 5.67 | 4.74 |
| POLR2D             | 5.38 | 5.74 | 4.91 |
| DLL1               | 5.38 | 5.93 | 4.94 |
| MIR3198-1          | 5.38 | 5.82 | 4.95 |
| RANBP10            | 5.38 | 5.74 | 5.02 |
| CD8A               | 5.38 | 5.74 | 4.98 |
| EVI2B              | 5.38 | 6.46 | 4.72 |
| MEIS2              | 5.38 | 5.71 | 4.99 |
| C20orf181          | 5.38 | 5.69 | 5.03 |
| MAP2K5             | 5.38 | 5.80 | 4.67 |
| RNGTT              | 5.38 | 5.92 | 4.85 |
| DTNBP1             | 5.38 | 5.99 | 5.04 |
| DAG1               | 5.38 | 5.62 | 5.05 |
| STIM2              | 5.38 | 5.83 | 5.03 |
| FNDC5              | 5.38 | 5.78 | 5.01 |
| FBXL17             | 5.38 | 5.78 | 4.80 |
| OTTHUMG00000171455 | 5.38 | 6.39 | 4.88 |
| MCUR1              | 5.38 | 5.86 | 4.68 |
| LOC284628          | 5.38 | 5.77 | 5.05 |
| YDJC               | 5.38 | 5.81 | 5.09 |
| NOP56              | 5.38 | 5.70 | 5.03 |
| LOC100506963       | 5.38 | 5.52 | 5.11 |
| FAM41AY1           | 5.38 | 6.03 | 4.82 |
| RPL22              | 5.38 | 5.70 | 5.09 |
| FLJ43763           | 5.38 | 6.15 | 4.98 |
| AFG3L1P            | 5.38 | 5.62 | 5.01 |
| NAPEPLD            | 5.38 | 5.91 | 4.72 |
| KRT8               | 5.38 | 6.32 | 5.03 |
| CDK20              | 5.38 | 5.84 | 5.08 |
| LOC646588          | 5.38 | 6.68 | 3.73 |
| CDNF               | 5.38 | 5.78 | 4.68 |
| DLX3               | 5.38 | 6.28 | 4.05 |
| RANBP6             | 5.38 | 5.97 | 4.95 |
| TBL3               | 5.38 | 5.65 | 5.15 |
| ROGDI              | 5.38 | 5.81 | 5.06 |
| CAPN5              | 5.38 | 5.55 | 5.18 |
| RSAD1              | 5.38 | 5.62 | 4.97 |
| CYP21A1P           | 5.38 | 6.17 | 4.78 |
| DGAT2              | 5.38 | 6.08 | 5.08 |
| ZNF337             | 5.38 | 5.94 | 4.79 |
| ZNF468             | 5.38 | 5.63 | 4.98 |
| OTTHUMG00000074741 | 5.38 | 6.58 | 4.20 |
| FAM98C             | 5.38 | 5.88 | 5.11 |
| OTTHUMG00000018105 | 5.38 | 6.28 | 4.55 |
| ZNF266             | 5.38 | 5.86 | 4.74 |
| SNORD113-8         | 5.38 | 6.56 | 4.41 |

|                    |      |      |      |
|--------------------|------|------|------|
| PPAPDC1A           | 5.38 | 5.99 | 4.94 |
| MAD2L2             | 5.38 | 5.64 | 5.04 |
| ANHX               | 5.37 | 5.71 | 5.09 |
| SELENBP1           | 5.37 | 5.77 | 4.85 |
| LOC100506379       | 5.37 | 6.04 | 4.91 |
| LOC100507316       | 5.37 | 5.74 | 4.66 |
| COX4I2             | 5.37 | 6.08 | 4.54 |
| FLJ42102           | 5.37 | 5.65 | 5.17 |
| MAGEA2             | 5.37 | 5.92 | 4.94 |
| TMEM164            | 5.37 | 5.78 | 4.93 |
| UEVLD              | 5.37 | 5.80 | 4.97 |
| FBXW11             | 5.37 | 5.79 | 4.75 |
| HRAS               | 5.37 | 5.80 | 4.84 |
| PDE7A              | 5.37 | 5.81 | 4.95 |
| PDE6G              | 5.37 | 5.93 | 4.78 |
| SLC25A28           | 5.37 | 5.73 | 5.07 |
| MADD               | 5.37 | 5.71 | 5.05 |
| TRIP6              | 5.37 | 5.91 | 4.73 |
| CYP2U1             | 5.37 | 5.95 | 4.93 |
| LINC00523          | 5.37 | 5.96 | 5.14 |
| DKFZP434F142       | 5.37 | 5.71 | 4.91 |
| PPP1R9B            | 5.37 | 5.89 | 4.55 |
| LAT2               | 5.37 | 5.91 | 5.21 |
| TAS1R3             | 5.37 | 5.65 | 4.87 |
| SNAPC2             | 5.37 | 5.76 | 4.83 |
| GBA2               | 5.37 | 5.67 | 5.08 |
| POM121L9P          | 5.37 | 6.49 | 3.89 |
| INSC               | 5.37 | 5.93 | 4.75 |
| OTTHUMG00000160774 | 5.37 | 5.70 | 5.01 |
| FECH               | 5.37 | 5.80 | 4.88 |
| NLRX1              | 5.37 | 5.57 | 5.20 |
| RNA5SP365          | 5.37 | 5.96 | 4.54 |
| MIR4646            | 5.37 | 6.00 | 4.49 |
| ETV3               | 5.37 | 5.80 | 4.69 |
| ACSL1              | 5.37 | 5.70 | 4.79 |
| OTTHUMG00000171624 | 5.37 | 5.65 | 5.03 |
| ARAP1              | 5.37 | 5.69 | 4.77 |
| NSUN6              | 5.37 | 6.09 | 4.56 |
| ZNF431             | 5.37 | 5.80 | 4.71 |
| OXR1               | 5.37 | 6.24 | 4.68 |
| ZNF410             | 5.37 | 5.91 | 4.89 |
| TLR2               | 5.37 | 6.50 | 4.90 |
| NUBPL              | 5.37 | 5.67 | 5.02 |
| GAPDH              | 5.37 | 6.05 | 4.60 |
| S100A13            | 5.37 | 5.71 | 4.94 |
| BCAT2              | 5.37 | 5.73 | 5.03 |
| ARG2               | 5.37 | 5.86 | 4.93 |
| PYY                | 5.37 | 5.89 | 4.92 |
| MAGOH              | 5.37 | 6.07 | 4.89 |

|                    |      |      |      |
|--------------------|------|------|------|
| FGF14-AS1          | 5.37 | 5.69 | 5.01 |
| C11orf87           | 5.37 | 5.76 | 5.07 |
| LOC401397          | 5.37 | 5.77 | 4.86 |
| SSBP4              | 5.37 | 5.63 | 4.72 |
| HTRA3              | 5.37 | 6.06 | 4.91 |
| DAPK1              | 5.37 | 6.02 | 4.70 |
| PLEKHA5            | 5.37 | 5.92 | 4.60 |
| ARMCX5-GPRASP2     | 5.37 | 5.70 | 5.05 |
| PCNA               | 5.37 | 6.18 | 4.69 |
| ZNF277             | 5.37 | 5.76 | 5.00 |
| GPRIN2             | 5.37 | 5.95 | 5.07 |
| OTTHUMG00000162179 | 5.37 | 5.85 | 5.00 |
| BBC3               | 5.37 | 5.68 | 5.06 |
| OTTHUMG00000014623 | 5.37 | 5.80 | 4.97 |
| C12orf29           | 5.37 | 5.69 | 5.03 |
| MRPL36             | 5.37 | 5.63 | 4.87 |
| TENM1              | 5.37 | 5.83 | 4.89 |
| LMTK3              | 5.37 | 5.72 | 5.08 |
| TBL1X              | 5.37 | 5.84 | 4.94 |
| PPFIA4             | 5.37 | 5.70 | 5.10 |
| TFAP2E             | 5.37 | 5.68 | 5.04 |
| TMEM132B           | 5.37 | 5.85 | 5.12 |
| MX1                | 5.37 | 6.23 | 4.93 |
| DAB1               | 5.37 | 5.95 | 4.90 |
| KIAA0195           | 5.37 | 5.63 | 5.07 |
| LOC91450           | 5.37 | 5.71 | 5.16 |
| ZSCAN20            | 5.37 | 5.76 | 4.79 |
| POC5               | 5.37 | 5.57 | 5.18 |
| LOC100129461       | 5.37 | 5.70 | 5.01 |
| NMT2               | 5.37 | 5.80 | 4.99 |
| PTK6               | 5.37 | 5.67 | 4.98 |
| MIRLET7A1          | 5.37 | 5.87 | 4.73 |
| LOC253573          | 5.36 | 5.76 | 4.85 |
| TRIM22             | 5.36 | 6.21 | 4.84 |
| RSPO4              | 5.36 | 5.88 | 4.87 |
| PGAP3              | 5.36 | 6.05 | 4.89 |
| VGLL3              | 5.36 | 5.73 | 4.85 |
| DHODH              | 5.36 | 5.69 | 5.13 |
| RAB38              | 5.36 | 5.64 | 4.97 |
| NDOR1              | 5.36 | 5.53 | 5.05 |
| HPCAL1             | 5.36 | 5.85 | 4.97 |
| SMUG1              | 5.36 | 5.83 | 5.05 |
| OTTHUMG00000035956 | 5.36 | 6.16 | 4.56 |
| ARHGDIB            | 5.36 | 5.72 | 5.08 |
| LOC100505502       | 5.36 | 5.63 | 5.16 |
| LZTS1-AS1          | 5.36 | 5.98 | 4.96 |
| ZNF146             | 5.36 | 5.86 | 4.75 |
| PEPD               | 5.36 | 5.92 | 4.53 |
| LOC100507516       | 5.36 | 6.43 | 4.23 |



|                    |      |      |      |
|--------------------|------|------|------|
| SAPCD1-AS1         | 5.36 | 5.68 | 5.03 |
| TTLL12             | 5.36 | 5.78 | 5.02 |
| FGD6               | 5.36 | 5.76 | 4.78 |
| RBM18              | 5.36 | 5.91 | 4.89 |
| LINC00617          | 5.36 | 5.81 | 5.06 |
| LOC100130557       | 5.36 | 5.90 | 4.84 |
| OTTHUMG00000173078 | 5.36 | 5.85 | 4.87 |
| P4HA3              | 5.36 | 6.85 | 4.53 |
| FAM131C            | 5.36 | 5.64 | 4.65 |
| OTTHUMG00000013334 | 5.36 | 6.34 | 4.67 |
| SMCR9              | 5.36 | 6.03 | 4.73 |
| ZCCHC10            | 5.36 | 5.84 | 5.07 |
| ST3GAL4-AS1        | 5.36 | 5.56 | 5.10 |
| RRP1B              | 5.36 | 5.65 | 5.07 |
| FOXF1              | 5.36 | 5.55 | 5.01 |
| FAM222A            | 5.36 | 5.79 | 4.83 |
| MTA1               | 5.36 | 5.73 | 4.94 |
| BACH1              | 5.36 | 5.90 | 4.89 |
| OTTHUMG00000086844 | 5.36 | 5.68 | 4.99 |
| HPS6               | 5.36 | 5.83 | 4.90 |
| TYK2               | 5.36 | 5.59 | 5.18 |
| USP54              | 5.36 | 5.73 | 5.04 |
| NES                | 5.36 | 6.05 | 4.91 |
| GLCCI1             | 5.36 | 5.90 | 4.81 |
| DKFZp779M0652      | 5.36 | 5.99 | 4.91 |
| TRIM58             | 5.36 | 5.81 | 5.13 |
| OTTHUMG00000058207 | 5.36 | 5.84 | 4.90 |
| CDC42EP1           | 5.36 | 5.84 | 5.00 |
| CSF3               | 5.36 | 5.80 | 4.83 |
| CACNB3             | 5.36 | 5.66 | 5.19 |
| SRGAP2-AS1         | 5.36 | 5.64 | 5.22 |
| PHC2               | 5.36 | 5.75 | 5.03 |
| WDR6               | 5.36 | 5.79 | 4.86 |
| TSSC4              | 5.36 | 5.67 | 5.04 |
| CNPPD1             | 5.36 | 5.63 | 4.84 |
| SBF1               | 5.36 | 5.83 | 4.95 |
| AGAP1              | 5.36 | 5.63 | 4.77 |
| MTERFD1            | 5.36 | 5.67 | 4.94 |
| OTTHUMG00000017963 | 5.36 | 5.89 | 4.95 |
| ZDHH3              | 5.36 | 5.74 | 5.03 |
| CRAMP1L            | 5.36 | 5.60 | 5.06 |
| DFNB31             | 5.36 | 5.66 | 4.87 |
| OTTHUMG00000018169 | 5.36 | 5.75 | 5.03 |
| SPTBN5             | 5.36 | 5.64 | 5.03 |
| ZNF232             | 5.36 | 5.99 | 4.95 |
| PCDHB9             | 5.36 | 5.83 | 4.54 |
| SCUBE3             | 5.36 | 5.55 | 5.05 |
| TMPRSS4-AS1        | 5.36 | 5.83 | 4.76 |
| TBPL1              | 5.36 | 6.22 | 4.52 |

|                    |      |      |      |
|--------------------|------|------|------|
| TEFM               | 5.36 | 5.95 | 4.91 |
| GNAI2              | 5.36 | 5.61 | 4.82 |
| PPARD              | 5.36 | 5.60 | 4.97 |
| SCARF1             | 5.36 | 5.66 | 5.07 |
| IER2               | 5.36 | 5.56 | 4.84 |
| OTTHUMG00000170842 | 5.36 | 5.71 | 4.99 |
| SLC25A5            | 5.36 | 5.95 | 4.83 |
| PRICKLE2-AS3       | 5.36 | 6.16 | 4.88 |
| RSPO2              | 5.35 | 6.55 | 4.68 |
| LDLR               | 5.35 | 5.87 | 4.71 |
| SBSN               | 5.35 | 5.90 | 4.97 |
| MVB12A             | 5.35 | 6.00 | 4.89 |
| TIGD5              | 5.35 | 5.63 | 5.03 |
| WFIKKN1            | 5.35 | 5.84 | 4.95 |
| OTTHUMG00000164793 | 5.35 | 5.98 | 4.53 |
| LOC100506023       | 5.35 | 5.87 | 4.46 |
| USP9Y              | 5.35 | 6.41 | 3.65 |
| KLK6               | 5.35 | 5.73 | 4.97 |
| BRD1               | 5.35 | 5.54 | 5.03 |
| RND3               | 5.35 | 6.23 | 4.57 |
| INTU               | 5.35 | 5.69 | 4.92 |
| VOPP1              | 5.35 | 5.59 | 5.16 |
| B4GALT4            | 5.35 | 5.67 | 4.88 |
| SYT15              | 5.35 | 5.67 | 5.02 |
| OTTHUMG00000179876 | 5.35 | 6.04 | 4.77 |
| PNMAL2             | 5.35 | 5.76 | 5.08 |
| DCBLD1             | 5.35 | 5.72 | 4.95 |
| C10orf105          | 5.35 | 6.20 | 4.75 |
| PYROXD1            | 5.35 | 5.87 | 4.61 |
| PALB2              | 5.35 | 5.70 | 4.93 |
| ITGAM              | 5.35 | 6.29 | 4.92 |
| PAIP1              | 5.35 | 6.01 | 4.81 |
| ARID1A             | 5.35 | 5.57 | 4.94 |
| PLEKHN1            | 5.35 | 5.62 | 5.08 |
| SLC41A1            | 5.35 | 5.82 | 4.97 |
| GPR144             | 5.35 | 5.75 | 4.83 |
| ASB16-AS1          | 5.35 | 5.73 | 4.83 |
| LOC100506667       | 5.35 | 5.86 | 4.68 |
| RAD51B             | 5.35 | 5.56 | 5.14 |
| CRYAA              | 5.35 | 5.71 | 5.09 |
| PDCL3              | 5.35 | 5.82 | 5.10 |
| RXFP4              | 5.35 | 5.62 | 4.80 |
| CHST12             | 5.35 | 5.66 | 5.14 |
| APH1B              | 5.35 | 5.57 | 5.15 |
| CYP2S1             | 5.35 | 5.77 | 4.81 |
| CHRNB1             | 5.35 | 5.85 | 4.86 |
| HSF1               | 5.35 | 5.68 | 4.93 |
| ZMYND10-AS1        | 5.35 | 5.95 | 4.40 |
| CHST1              | 5.35 | 5.88 | 5.13 |

|                    |      |      |      |
|--------------------|------|------|------|
| NR2F1              | 5.35 | 5.90 | 4.96 |
| GAL3ST4            | 5.35 | 6.00 | 4.42 |
| CYB5D1             | 5.35 | 5.59 | 5.11 |
| C10orf88           | 5.35 | 5.82 | 4.52 |
| PIGO               | 5.35 | 5.88 | 5.08 |
| CCDC74A            | 5.35 | 5.62 | 4.85 |
| SSH2               | 5.35 | 5.67 | 4.89 |
| ZNF787             | 5.35 | 6.03 | 4.64 |
| RNF31              | 5.35 | 5.64 | 5.10 |
| ZMYND15            | 5.35 | 5.71 | 4.97 |
| FOXP3              | 5.35 | 5.96 | 4.92 |
| USP37              | 5.35 | 5.69 | 4.83 |
| HIST1H2BO          | 5.35 | 5.76 | 5.14 |
| WNT5B              | 5.35 | 5.77 | 4.94 |
| EMR2               | 5.35 | 6.02 | 4.73 |
| HCCAT4             | 5.35 | 5.89 | 4.94 |
| TRIM39             | 5.35 | 5.59 | 4.91 |
| B9D2               | 5.35 | 5.82 | 4.92 |
| OTTHUMG00000152658 | 5.35 | 5.58 | 5.02 |
| AKR1C1             | 5.35 | 6.17 | 4.74 |
| LOC730098          | 5.35 | 5.83 | 4.84 |
| STARD10            | 5.35 | 5.79 | 4.87 |
| IGHV1OR21-1        | 5.35 | 5.80 | 4.72 |
| LOC100129917       | 5.35 | 5.93 | 4.69 |
| SYTL1              | 5.35 | 5.66 | 5.04 |
| KRTAP11-1          | 5.35 | 5.96 | 4.56 |
| ASUN               | 5.35 | 6.17 | 4.96 |
| WFDC10A            | 5.35 | 5.68 | 4.83 |
| DNAJB5             | 5.35 | 5.81 | 5.03 |
| PFKFB2             | 5.35 | 5.64 | 5.14 |
| CDCA3              | 5.35 | 5.74 | 4.95 |
| WIBG               | 5.35 | 5.63 | 4.63 |
| DGKE               | 5.35 | 5.68 | 5.04 |
| OR10G9             | 5.35 | 5.88 | 4.98 |
| TPBGL              | 5.35 | 5.74 | 4.92 |
| ZNF518B            | 5.35 | 5.80 | 4.86 |
| C1orf86            | 5.35 | 5.69 | 5.03 |
| IL2RB              | 5.34 | 5.74 | 4.90 |
| OTTHUMG00000153381 | 5.34 | 5.56 | 5.01 |
| VPS33B             | 5.34 | 5.63 | 4.81 |
| LDLRAD4            | 5.34 | 5.83 | 4.89 |
| SLC5A3             | 5.34 | 5.81 | 4.95 |
| NF2                | 5.34 | 5.68 | 4.96 |
| NDUFB8             | 5.34 | 5.65 | 4.74 |
| KCNK12             | 5.34 | 5.84 | 5.03 |
| ASAH2C             | 5.34 | 6.09 | 4.69 |
| AAMDC              | 5.34 | 5.73 | 5.02 |
| TRIP4              | 5.34 | 5.56 | 5.09 |
| SLFN11             | 5.34 | 6.00 | 4.62 |

|                    |      |      |      |
|--------------------|------|------|------|
| TRAJ54             | 5.34 | 6.08 | 4.67 |
| C15orf39           | 5.34 | 5.69 | 4.89 |
| OTTHUMG00000151403 | 5.34 | 5.73 | 4.93 |
| PCBP3              | 5.34 | 5.96 | 5.04 |
| TIMD4              | 5.34 | 7.09 | 3.83 |
| LINC00413          | 5.34 | 5.81 | 4.97 |
| HECA               | 5.34 | 5.71 | 4.90 |
| SH2D5              | 5.34 | 5.67 | 5.04 |
| MME                | 5.34 | 7.15 | 4.56 |
| APTX               | 5.34 | 5.56 | 5.16 |
| TFPT               | 5.34 | 5.91 | 4.84 |
| DUSP7              | 5.34 | 5.72 | 4.86 |
| LOC100506844       | 5.34 | 5.57 | 4.98 |
| RNU12              | 5.34 | 5.72 | 4.38 |
| CTRC               | 5.34 | 5.61 | 5.10 |
| EPST11             | 5.34 | 5.76 | 4.88 |
| GRB10              | 5.34 | 5.92 | 4.84 |
| ETV5               | 5.34 | 6.05 | 4.44 |
| FBXW4              | 5.34 | 5.83 | 4.56 |
| FLI1               | 5.34 | 5.83 | 4.72 |
| MIR544A            | 5.34 | 6.25 | 3.95 |
| OTTHUMG00000152728 | 5.34 | 5.82 | 4.68 |
| MIR920             | 5.34 | 6.47 | 4.69 |
| RTN4IP1            | 5.34 | 5.85 | 4.77 |
| ZNF426             | 5.34 | 5.80 | 5.00 |
| PTP4A1             | 5.34 | 5.94 | 4.83 |
| UNC13D             | 5.34 | 5.66 | 5.03 |
| RAP1GAP2           | 5.34 | 5.89 | 4.82 |
| LARP6              | 5.34 | 5.69 | 5.02 |
| MCCC1              | 5.34 | 5.69 | 5.06 |
| TXLNG2P            | 5.34 | 6.50 | 3.28 |
| UFSP1              | 5.34 | 5.68 | 5.00 |
| POLR1C             | 5.34 | 5.74 | 4.92 |
| FILIP1L            | 5.34 | 5.89 | 4.84 |
| MTMR9              | 5.34 | 5.86 | 4.90 |
| ZNF420             | 5.34 | 5.79 | 4.49 |
| SLURP1             | 5.34 | 5.68 | 4.71 |
| ZNF609             | 5.34 | 5.73 | 4.97 |
| OCRL               | 5.34 | 6.27 | 4.37 |
| SOD2               | 5.34 | 6.01 | 4.58 |
| MIR298             | 5.34 | 5.60 | 4.90 |
| LINC00671          | 5.34 | 6.05 | 4.94 |
| UNC93B1            | 5.34 | 5.55 | 5.04 |
| MEGF8              | 5.34 | 5.87 | 5.04 |
| HCG26              | 5.34 | 5.87 | 4.88 |
| C15orf57           | 5.34 | 5.69 | 4.45 |
| ELP4               | 5.34 | 5.76 | 4.85 |
| ZKSCAN7            | 5.34 | 5.57 | 5.13 |
| LOC100132815       | 5.34 | 6.09 | 4.81 |

|                    |      |      |      |
|--------------------|------|------|------|
| C9orf139           | 5.34 | 5.94 | 4.82 |
| NCR3               | 5.34 | 5.63 | 5.10 |
| LGI2               | 5.34 | 6.29 | 4.00 |
| MCU                | 5.34 | 5.78 | 4.75 |
| ANKRD36C           | 5.34 | 5.78 | 5.03 |
| CPT1A              | 5.34 | 5.79 | 4.90 |
| CASP7              | 5.34 | 5.62 | 4.88 |
| MYADML2            | 5.34 | 5.66 | 4.72 |
| PPAPDC3            | 5.34 | 5.67 | 4.87 |
| FAM203A            | 5.34 | 5.52 | 5.11 |
| INVS               | 5.34 | 5.69 | 4.83 |
| SRXN1              | 5.34 | 5.70 | 4.78 |
| OTTHUMG00000171735 | 5.34 | 5.88 | 5.03 |
| FANCC              | 5.34 | 5.75 | 4.79 |
| ZNF529             | 5.34 | 5.65 | 5.10 |
| LOC100506603       | 5.34 | 5.75 | 4.99 |
| HTRA2              | 5.34 | 5.94 | 4.77 |
| EXOSC9             | 5.34 | 5.77 | 4.63 |
| PTCH1              | 5.34 | 6.34 | 4.28 |
| TEX264             | 5.34 | 5.59 | 5.13 |
| DDX23              | 5.34 | 5.74 | 4.88 |
| NCBP2-AS2          | 5.34 | 5.74 | 4.89 |
| KNTC1              | 5.34 | 5.81 | 4.76 |
| SCYL1              | 5.34 | 5.77 | 4.89 |
| ZHX2               | 5.33 | 5.63 | 5.00 |
| C16orf3            | 5.33 | 5.79 | 4.87 |
| HRC                | 5.33 | 5.85 | 4.96 |
| OTTHUMG00000042244 | 5.33 | 6.39 | 4.75 |
| TCEAL1             | 5.33 | 5.57 | 5.10 |
| C2CD4A             | 5.33 | 5.59 | 5.03 |
| GNB5               | 5.33 | 5.58 | 5.07 |
| CEP85              | 5.33 | 5.78 | 4.99 |
| CBX7               | 5.33 | 5.89 | 4.79 |
| CNNM3              | 5.33 | 5.74 | 4.95 |
| MEGF9              | 5.33 | 5.52 | 4.88 |
| PLK3               | 5.33 | 5.83 | 5.02 |
| NAGLU              | 5.33 | 5.67 | 5.02 |
| FBXO10             | 5.33 | 5.61 | 5.06 |
| CD84               | 5.33 | 6.47 | 4.67 |
| GPN2               | 5.33 | 5.72 | 4.99 |
| GPR101             | 5.33 | 5.80 | 4.77 |
| TBRG1              | 5.33 | 5.87 | 4.80 |
| PLXNA3             | 5.33 | 5.60 | 4.87 |
| OTTHUMG00000041501 | 5.33 | 5.81 | 5.04 |
| MIR152             | 5.33 | 5.76 | 4.86 |
| TRIM5              | 5.33 | 5.88 | 5.04 |
| SLC31A2            | 5.33 | 5.98 | 5.00 |
| TRMT2B-AS1         | 5.33 | 5.62 | 4.82 |
| ABCC5              | 5.33 | 5.64 | 5.07 |

|                    |      |      |      |
|--------------------|------|------|------|
| ALPK1              | 5.33 | 5.62 | 5.15 |
| ARRDC1             | 5.33 | 5.55 | 4.82 |
| SELO               | 5.33 | 5.64 | 4.75 |
| FBXO17             | 5.33 | 5.49 | 5.05 |
| S100PBP            | 5.33 | 5.66 | 4.82 |
| SYT2               | 5.33 | 5.79 | 5.01 |
| WDR62              | 5.33 | 5.56 | 5.07 |
| BPHL               | 5.33 | 5.56 | 4.84 |
| RNPEPL1            | 5.33 | 5.49 | 5.02 |
| RNF165             | 5.33 | 5.91 | 4.89 |
| ZNF385A            | 5.33 | 5.84 | 4.44 |
| DNASE2             | 5.33 | 5.83 | 4.92 |
| OTTHUMG00000170505 | 5.33 | 5.78 | 4.69 |
| RAB7L1             | 5.33 | 5.70 | 5.00 |
| LOC100294145       | 5.33 | 5.67 | 4.96 |
| XAB2               | 5.33 | 5.81 | 4.90 |
| MIR22HG            | 5.33 | 5.67 | 4.56 |
| EXOC8              | 5.33 | 5.65 | 4.94 |
| MTG2               | 5.33 | 5.65 | 4.92 |
| PPM1A              | 5.33 | 5.64 | 4.86 |
| LATS2              | 5.33 | 5.94 | 4.86 |
| SOGA1              | 5.33 | 5.68 | 4.91 |
| NSL1               | 5.33 | 5.63 | 4.67 |
| LMF2               | 5.33 | 5.56 | 5.07 |
| GGCT               | 5.33 | 5.76 | 4.49 |
| CRYBB2             | 5.33 | 5.69 | 4.83 |
| ALPL               | 5.33 | 6.13 | 4.50 |
| TGIF1              | 5.33 | 5.77 | 4.83 |
| SDE2               | 5.33 | 5.94 | 4.71 |
| SLC25A47           | 5.33 | 5.61 | 4.99 |
| ZNF219             | 5.33 | 5.66 | 5.07 |
| OTTHUMG00000169968 | 5.33 | 6.05 | 4.82 |
| MINA               | 5.33 | 5.60 | 4.88 |
| ZNF10              | 5.33 | 5.64 | 4.55 |
| MTG1               | 5.33 | 5.73 | 4.95 |
| THSD7A             | 5.33 | 5.91 | 4.45 |
| HMHB1              | 5.33 | 5.96 | 4.89 |
| MAP2K2             | 5.33 | 5.83 | 4.89 |
| GTPBP3             | 5.33 | 5.79 | 4.98 |
| NDUFB10            | 5.33 | 5.63 | 4.76 |
| REM1               | 5.33 | 5.67 | 4.84 |
| MESP2              | 5.33 | 5.59 | 5.07 |
| CSF2RB             | 5.33 | 5.68 | 4.84 |
| OSCP1              | 5.33 | 5.67 | 5.00 |
| SIPA1              | 5.33 | 5.98 | 4.77 |
| RBP1               | 5.33 | 5.80 | 4.91 |
| EIF4EBP1           | 5.33 | 6.10 | 4.83 |
| KATNA1             | 5.33 | 5.81 | 4.64 |
| SPNS1              | 5.33 | 5.87 | 4.90 |

|                           |      |      |      |
|---------------------------|------|------|------|
| <i>FCGR2B</i>             | 5.33 | 5.98 | 4.45 |
| <i>RPRD1B</i>             | 5.33 | 5.60 | 5.00 |
| <i>ABAT</i>               | 5.33 | 5.74 | 5.00 |
| <i>LOXL4</i>              | 5.33 | 5.89 | 4.78 |
| <i>SMLR1</i>              | 5.33 | 5.65 | 5.00 |
| <i>C3orf14</i>            | 5.33 | 5.86 | 4.84 |
| <i>LXN</i>                | 5.33 | 5.92 | 4.61 |
| <i>TATDN2</i>             | 5.33 | 5.65 | 4.92 |
| <i>ASCC1</i>              | 5.33 | 5.65 | 4.89 |
| <i>APOA1</i>              | 5.33 | 5.71 | 4.84 |
| <i>PNPLA8</i>             | 5.33 | 6.11 | 4.46 |
| <i>MTFR1L</i>             | 5.32 | 6.08 | 4.65 |
| <i>LIG1</i>               | 5.32 | 5.55 | 5.09 |
| <i>DOK7</i>               | 5.32 | 5.80 | 4.98 |
| <i>SQLE</i>               | 5.32 | 5.89 | 4.64 |
| <i>EMC9</i>               | 5.32 | 5.77 | 4.86 |
| <i>SELE</i>               | 5.32 | 6.35 | 4.23 |
| <i>LINC00684</i>          | 5.32 | 5.76 | 4.97 |
| <i>SNRPC</i>              | 5.32 | 5.65 | 4.95 |
| <i>TSPAN14</i>            | 5.32 | 5.77 | 4.96 |
| <i>COL5A1-AS1</i>         | 5.32 | 6.56 | 4.53 |
| <i>RGS5</i>               | 5.32 | 5.97 | 4.64 |
| <i>UTP3</i>               | 5.32 | 6.04 | 4.85 |
| <i>GNE</i>                | 5.32 | 5.69 | 4.98 |
| <i>UBP1</i>               | 5.32 | 5.71 | 4.95 |
| <i>PFKFB4</i>             | 5.32 | 5.84 | 4.98 |
| <i>PLIN3</i>              | 5.32 | 5.90 | 4.69 |
| <i>SIRT5</i>              | 5.32 | 5.65 | 5.14 |
| <i>TRMT11</i>             | 5.32 | 5.70 | 4.88 |
| <i>OTTHUMG00000041297</i> | 5.32 | 5.78 | 4.88 |
| <i>RUSC2</i>              | 5.32 | 5.91 | 4.73 |
| <i>EXOSC2</i>             | 5.32 | 5.65 | 5.04 |
| <i>FZD1</i>               | 5.32 | 6.23 | 4.48 |
| <i>LOC100130000</i>       | 5.32 | 6.02 | 4.92 |
| <i>RNA5SP338</i>          | 5.32 | 6.45 | 4.44 |
| <i>TMEM203</i>            | 5.32 | 5.94 | 4.49 |
| <i>MAR8</i>               | 5.32 | 5.58 | 5.12 |
| <i>CREB3L3</i>            | 5.32 | 5.75 | 5.09 |
| <i>FAM210A</i>            | 5.32 | 5.67 | 4.79 |
| <i>TEX29</i>              | 5.32 | 5.73 | 4.84 |
| <i>TRIT1</i>              | 5.32 | 5.90 | 4.61 |
| <i>TNF</i>                | 5.32 | 5.93 | 4.98 |
| <i>TREX1</i>              | 5.32 | 5.61 | 5.14 |
| <i>VPS11</i>              | 5.32 | 5.55 | 4.90 |
| <i>THAP3</i>              | 5.32 | 5.78 | 4.88 |
| <i>RP5-905G11.4</i>       | 5.32 | 5.82 | 5.05 |
| <i>LINC00650</i>          | 5.32 | 5.77 | 4.65 |
| <i>MTO1</i>               | 5.32 | 5.69 | 4.81 |
| <i>C9orf62</i>            | 5.32 | 5.70 | 4.88 |

|                    |      |      |      |
|--------------------|------|------|------|
| FAM13A-AS1         | 5.32 | 5.77 | 4.94 |
| COMMD9             | 5.32 | 5.67 | 4.77 |
| GNA11              | 5.32 | 5.79 | 4.85 |
| TMEM125            | 5.32 | 5.84 | 5.00 |
| FOXK1              | 5.32 | 5.69 | 5.01 |
| COLQ               | 5.32 | 5.64 | 4.97 |
| KALRN              | 5.32 | 5.63 | 4.94 |
| NPRL2              | 5.32 | 5.57 | 5.01 |
| UQCC               | 5.32 | 5.62 | 4.99 |
| NAF1               | 5.32 | 5.52 | 5.09 |
| OTTHUMG00000170275 | 5.32 | 5.84 | 4.95 |
| MIPOL1             | 5.32 | 5.67 | 5.02 |
| MTMR7              | 5.32 | 5.92 | 4.44 |
| PIM3               | 5.32 | 5.68 | 5.02 |
| BPIFB2             | 5.32 | 5.89 | 5.01 |
| TMEM186            | 5.32 | 5.63 | 4.93 |
| PLA2G6             | 5.32 | 5.52 | 5.15 |
| RMDN2              | 5.32 | 5.65 | 5.01 |
| ARL2-SNX15         | 5.32 | 5.52 | 5.06 |
| KLF5               | 5.32 | 5.51 | 5.12 |
| TRIM49D2P          | 5.32 | 6.21 | 4.86 |
| USP28              | 5.32 | 5.69 | 4.92 |
| ARSD-AS1           | 5.32 | 5.65 | 4.61 |
| CCDC111            | 5.32 | 5.75 | 4.86 |
| GTF3C1             | 5.32 | 5.67 | 4.96 |
| PPM1K              | 5.32 | 5.75 | 4.83 |
| IL17D              | 5.32 | 5.79 | 4.82 |
| LOC100996870       | 5.32 | 5.87 | 4.72 |
| DOK4               | 5.32 | 5.59 | 4.96 |
| OTTHUMG00000168177 | 5.32 | 5.67 | 5.00 |
| CLCN3              | 5.32 | 5.90 | 4.67 |
| DCUN1D2-AS2        | 5.32 | 5.74 | 4.70 |
| PCCB               | 5.32 | 5.51 | 5.03 |
| LINC00582          | 5.32 | 6.14 | 4.53 |
| PRKD2              | 5.32 | 5.77 | 5.05 |
| MAP3K14-AS1        | 5.32 | 5.58 | 4.90 |
| ENDOV              | 5.32 | 5.68 | 5.05 |
| MED29              | 5.32 | 5.75 | 4.84 |
| SRP54              | 5.32 | 5.80 | 4.94 |
| ERI3               | 5.32 | 5.56 | 4.94 |
| DHTKD1             | 5.31 | 5.53 | 4.96 |
| RAMP1              | 5.31 | 5.57 | 4.88 |
| WASH4P             | 5.31 | 6.02 | 4.11 |
| ATP5G2             | 5.31 | 5.83 | 4.86 |
| HARS               | 5.31 | 5.73 | 4.54 |
| TOPORS-AS1         | 5.31 | 5.74 | 4.86 |
| HDAC10             | 5.31 | 5.73 | 4.83 |
| FDPS               | 5.31 | 5.65 | 4.74 |
| LINC00634          | 5.31 | 5.88 | 4.63 |



|                    |      |      |      |
|--------------------|------|------|------|
| FAM149A            | 5.31 | 5.75 | 5.08 |
| OTTHUMG00000086913 | 5.31 | 5.68 | 5.12 |
| PRR14L             | 5.31 | 5.65 | 4.88 |
| MIR320C1           | 5.31 | 5.69 | 5.08 |
| SHE                | 5.31 | 5.58 | 4.99 |
| GRIK3              | 5.31 | 5.64 | 5.11 |
| OSBPL10            | 5.31 | 5.88 | 4.94 |
| RFX3               | 5.31 | 5.66 | 5.08 |
| SNX33              | 5.31 | 6.16 | 4.63 |
| CIITA              | 5.31 | 6.12 | 4.99 |
| LMNB2              | 5.31 | 5.76 | 5.02 |
| PEX7               | 5.31 | 5.53 | 5.05 |
| BARHL1             | 5.31 | 5.66 | 4.93 |
| GMIP               | 5.31 | 5.55 | 5.08 |
| MIR548I3           | 5.31 | 5.65 | 4.64 |
| SWSAP1             | 5.31 | 5.52 | 4.97 |
| NDUFB2-AS1         | 5.31 | 5.58 | 5.02 |
| C11orf91           | 5.31 | 5.70 | 4.99 |
| CHN2               | 5.31 | 5.58 | 4.78 |
| LOC100506978       | 5.31 | 5.73 | 5.02 |
| SNTB1              | 5.31 | 6.02 | 4.50 |
| SLC5A9             | 5.31 | 5.61 | 5.10 |
| CPSF3              | 5.31 | 5.80 | 4.92 |
| SNORA55            | 5.31 | 5.84 | 4.91 |
| ANLN               | 5.31 | 6.24 | 4.49 |
| PIGZ               | 5.31 | 5.61 | 5.03 |
| MR1                | 5.31 | 5.84 | 4.64 |
| OTTHUMG00000180211 | 5.31 | 5.83 | 4.94 |
| VAR2               | 5.31 | 5.80 | 5.10 |
| OTTHUMG00000164048 | 5.31 | 6.23 | 4.52 |
| HSF2               | 5.31 | 5.74 | 4.93 |
| CARD9              | 5.31 | 5.74 | 4.85 |
| MCM4               | 5.31 | 5.66 | 4.83 |
| ANXA8L2            | 5.31 | 5.65 | 5.00 |
| LOC150381          | 5.31 | 5.60 | 4.68 |
| SMIM8              | 5.31 | 5.84 | 4.55 |
| ZNF446             | 5.31 | 5.65 | 5.10 |
| LOC728989          | 5.31 | 5.73 | 4.77 |
| B4GALT7            | 5.31 | 5.78 | 4.85 |
| TTY22              | 5.31 | 5.67 | 4.91 |
| CES1               | 5.31 | 6.11 | 4.33 |
| GNPDA2             | 5.31 | 5.74 | 4.43 |
| ZNF114             | 5.31 | 5.62 | 4.70 |
| LYNX1              | 5.31 | 5.63 | 5.08 |
| CENPP              | 5.31 | 6.02 | 4.67 |
| ADRB3              | 5.31 | 5.67 | 5.08 |
| ZBTB14             | 5.31 | 5.88 | 4.74 |
| LOC283501          | 5.31 | 5.95 | 4.81 |
| HJURP              | 5.31 | 5.80 | 5.07 |

|                    |      |      |      |
|--------------------|------|------|------|
| RNU6-64P           | 5.31 | 5.71 | 5.00 |
| ZNF184             | 5.31 | 5.67 | 4.83 |
| IQCC               | 5.31 | 5.65 | 4.86 |
| TIE1               | 5.31 | 5.74 | 4.92 |
| MBD3L4             | 5.31 | 5.94 | 5.01 |
| OBP2A              | 5.31 | 5.69 | 4.34 |
| ADAMTS10           | 5.31 | 5.85 | 5.02 |
| LOC374443          | 5.31 | 5.87 | 4.50 |
| LOC642648          | 5.31 | 5.90 | 4.07 |
| MRPL28             | 5.31 | 5.67 | 5.02 |
| SKA2               | 5.31 | 5.65 | 4.82 |
| BAG4               | 5.31 | 5.66 | 4.83 |
| SHISA7             | 5.31 | 5.85 | 5.03 |
| TNNC2              | 5.31 | 5.64 | 4.72 |
| TCAP               | 5.31 | 5.96 | 4.75 |
| ILVBL              | 5.31 | 5.56 | 4.85 |
| RPUSD3             | 5.31 | 5.53 | 5.02 |
| ZNF334             | 5.31 | 5.85 | 4.71 |
| OR8B3              | 5.31 | 6.03 | 4.44 |
| HOXC4              | 5.31 | 5.68 | 4.95 |
| C9orf141           | 5.31 | 5.72 | 5.02 |
| OTTHUMG00000161856 | 5.31 | 6.08 | 4.76 |
| MMAA               | 5.31 | 5.82 | 4.87 |
| C11orf49           | 5.31 | 5.62 | 5.05 |
| RGP1               | 5.31 | 5.68 | 4.85 |
| NOTCH1             | 5.31 | 5.70 | 4.80 |
| SLC17A9            | 5.31 | 5.54 | 4.94 |
| ETAA1              | 5.31 | 5.84 | 4.59 |
| MCPH1              | 5.31 | 5.60 | 4.83 |
| SMTN               | 5.31 | 5.48 | 4.99 |
| TFAMP1             | 5.31 | 5.82 | 5.03 |
| DSG2               | 5.31 | 6.91 | 4.43 |
| CDAN1              | 5.31 | 5.62 | 4.79 |
| PEX12              | 5.31 | 5.58 | 5.07 |
| MIR4698            | 5.31 | 5.72 | 4.84 |
| AMTN               | 5.31 | 7.28 | 3.25 |
| THTPA              | 5.31 | 5.57 | 5.05 |
| COL8A2             | 5.31 | 5.93 | 4.86 |
| TNFRSF10D          | 5.30 | 6.52 | 4.52 |
| TSNAX-DISC1        | 5.30 | 5.52 | 5.07 |
| KRTAP1-5           | 5.30 | 5.93 | 4.36 |
| LRRN4CL            | 5.30 | 5.57 | 4.94 |
| OTTHUMG00000020691 | 5.30 | 5.83 | 5.11 |
| RFC5               | 5.30 | 5.75 | 4.97 |
| FAM127C            | 5.30 | 5.85 | 4.74 |
| NPDC1              | 5.30 | 5.72 | 4.88 |
| STX16-NPEPL1       | 5.30 | 5.65 | 5.11 |
| LEPREL1            | 5.30 | 6.51 | 4.68 |
| MDFIC              | 5.30 | 5.81 | 4.97 |

|              |      |      |      |
|--------------|------|------|------|
| PIDD         | 5.30 | 5.58 | 4.96 |
| FAM107B      | 5.30 | 5.56 | 4.78 |
| NFRKB        | 5.30 | 5.73 | 4.97 |
| FAM184B      | 5.30 | 5.71 | 5.00 |
| AGTPBP1      | 5.30 | 5.70 | 4.80 |
| TMEM134      | 5.30 | 5.78 | 4.71 |
| POLR3E       | 5.30 | 5.48 | 5.08 |
| GZF1         | 5.30 | 5.55 | 5.10 |
| PCDH12       | 5.30 | 5.78 | 4.99 |
| FAM69A       | 5.30 | 5.54 | 4.93 |
| PPARG        | 5.30 | 5.95 | 4.43 |
| NUDT14       | 5.30 | 5.59 | 4.99 |
| SNORA74B     | 5.30 | 5.93 | 4.72 |
| ZNF8         | 5.30 | 5.53 | 4.94 |
| MRPS18C      | 5.30 | 5.81 | 4.73 |
| VEGFB        | 5.30 | 6.08 | 4.82 |
| LOC100507646 | 5.30 | 5.76 | 4.56 |
| PTPRCAP      | 5.30 | 5.87 | 4.64 |
| BCAR3        | 5.30 | 5.48 | 5.09 |
| CCR7         | 5.30 | 6.11 | 4.92 |
| MRPL4        | 5.30 | 5.56 | 5.02 |
| NVL          | 5.30 | 5.92 | 4.68 |
| ZNF182       | 5.30 | 5.80 | 4.60 |
| RIMS4        | 5.30 | 5.57 | 4.84 |
| UBAP1        | 5.30 | 5.84 | 4.59 |
| PCYOX1L      | 5.30 | 5.82 | 4.99 |
| DMKN         | 5.30 | 5.73 | 4.82 |
| GGA3         | 5.30 | 5.70 | 4.85 |
| C19orf47     | 5.30 | 5.41 | 5.18 |
| PLCG2        | 5.30 | 5.82 | 4.93 |
| MT1IP        | 5.30 | 5.95 | 4.90 |
| PGF          | 5.30 | 5.60 | 4.92 |
| LYN          | 5.30 | 5.67 | 4.86 |
| TSPYL2       | 5.30 | 5.64 | 4.80 |
| FAM58A       | 5.30 | 5.57 | 4.86 |
| SIL1         | 5.30 | 5.67 | 4.97 |
| TUBA1C       | 5.30 | 5.43 | 5.11 |
| OR2J3        | 5.30 | 5.76 | 4.79 |
| AGTRAP       | 5.30 | 5.75 | 4.97 |
| MIR4268      | 5.30 | 5.74 | 4.83 |
| RAVER1       | 5.30 | 5.68 | 4.84 |
| GDPD3        | 5.30 | 5.70 | 4.82 |
| ATP6V0E2-AS1 | 5.30 | 5.78 | 4.77 |
| MCM7         | 5.30 | 5.79 | 4.79 |
| RHOC         | 5.30 | 5.64 | 5.01 |
| BCO2         | 5.30 | 5.83 | 4.97 |
| AMOTL2       | 5.30 | 5.73 | 5.01 |
| TEX19        | 5.30 | 5.68 | 4.93 |
| FKBP14       | 5.30 | 6.27 | 4.39 |

|                    |      |      |      |
|--------------------|------|------|------|
| OTTHUMG00000164495 | 5.30 | 6.11 | 4.59 |
| GPR88              | 5.30 | 5.96 | 4.79 |
| SREBF1             | 5.30 | 5.61 | 4.93 |
| OTTHUMG00000132690 | 5.30 | 5.65 | 5.01 |
| FLJ44313           | 5.30 | 5.70 | 4.91 |
| PPP1R3G            | 5.30 | 5.81 | 4.91 |
| KCNQ4              | 5.30 | 5.57 | 5.07 |
| ARHGEF18           | 5.30 | 5.57 | 4.88 |
| ZNF354C            | 5.30 | 5.73 | 4.71 |
| SMPD3              | 5.30 | 5.67 | 4.96 |
| SLC39A4            | 5.30 | 5.83 | 5.04 |
| KRT18P55           | 5.30 | 5.67 | 4.98 |
| NOP14-AS1          | 5.30 | 5.61 | 4.99 |
| UVRAG              | 5.30 | 5.72 | 4.60 |
| ZNF280C            | 5.30 | 5.78 | 3.88 |
| MIOS               | 5.30 | 5.64 | 4.59 |
| PGBD1              | 5.30 | 5.50 | 5.07 |
| PCNA-AS1           | 5.30 | 5.74 | 4.92 |
| CMTM3              | 5.30 | 6.30 | 4.65 |
| KLC4               | 5.30 | 5.78 | 5.02 |
| PANX1              | 5.30 | 6.23 | 4.63 |
| ZNF765             | 5.30 | 5.52 | 5.01 |
| TRAF4              | 5.30 | 5.82 | 5.04 |
| EXOC6B             | 5.30 | 5.93 | 4.60 |
| TAPBPL             | 5.30 | 5.79 | 4.98 |
| CAND2              | 5.30 | 5.66 | 4.93 |
| LOC100132984       | 5.30 | 5.80 | 4.94 |
| SLC25A44           | 5.30 | 5.46 | 5.12 |
| BCKDHA             | 5.30 | 5.74 | 4.95 |
| RGS3               | 5.30 | 5.52 | 4.99 |
| CLDN25             | 5.30 | 5.74 | 4.92 |
| TIGD6              | 5.30 | 5.69 | 4.95 |
| CDC40              | 5.30 | 5.69 | 4.75 |
| ZBTB33             | 5.30 | 5.79 | 4.93 |
| BIRC8              | 5.30 | 5.64 | 5.01 |
| MIR4530            | 5.30 | 6.31 | 4.56 |
| LZTFL1             | 5.29 | 5.72 | 4.92 |
| BANF1              | 5.29 | 5.71 | 4.98 |
| PLCH2              | 5.29 | 5.63 | 4.98 |
| C2orf62            | 5.29 | 5.63 | 5.00 |
| KRT81              | 5.29 | 5.80 | 4.70 |
| RTN4RL1            | 5.29 | 5.66 | 4.97 |
| BNIP2              | 5.29 | 5.64 | 4.52 |
| FUT5               | 5.29 | 6.03 | 4.66 |
| COIL               | 5.29 | 5.64 | 4.57 |
| CCZ1B              | 5.29 | 5.65 | 4.52 |
| CYTH4              | 5.29 | 5.74 | 4.88 |
| LOC284751          | 5.29 | 5.68 | 4.88 |
| ACVR2A             | 5.29 | 5.59 | 4.90 |

|              |      |      |      |
|--------------|------|------|------|
| SMAP1        | 5.29 | 5.73 | 5.03 |
| ANXA8L1      | 5.29 | 5.74 | 5.01 |
| PITX3        | 5.29 | 6.02 | 4.98 |
| CAAP1        | 5.29 | 5.69 | 4.34 |
| COL9A1       | 5.29 | 6.10 | 4.19 |
| WASH3P       | 5.29 | 5.97 | 3.80 |
| LOC100128386 | 5.29 | 5.62 | 4.92 |
| AGPAT1       | 5.29 | 5.64 | 5.03 |
| NEGR1        | 5.29 | 5.85 | 4.69 |
| APOC3        | 5.29 | 5.74 | 5.01 |
| TTC33        | 5.29 | 5.75 | 4.88 |
| HOMEZ        | 5.29 | 5.66 | 5.05 |
| RSPH3        | 5.29 | 5.75 | 4.44 |
| TTC39C       | 5.29 | 5.67 | 4.72 |
| PRPF19       | 5.29 | 5.64 | 4.88 |
| SMAP2        | 5.29 | 5.75 | 5.01 |
| ZW10         | 5.29 | 5.72 | 4.92 |
| ATP1A3       | 5.29 | 5.68 | 4.99 |
| RMND1        | 5.29 | 5.80 | 4.49 |
| FLJ22184     | 5.29 | 5.79 | 4.94 |
| MIR330       | 5.29 | 5.80 | 4.79 |
| FAM174B      | 5.29 | 5.55 | 5.01 |
| TPBG         | 5.29 | 5.63 | 4.80 |
| TTC32        | 5.29 | 5.66 | 4.81 |
| KRTDAP       | 5.29 | 5.80 | 4.97 |
| TGFBR3L      | 5.29 | 5.70 | 4.94 |
| SFI1         | 5.29 | 5.48 | 4.96 |
| LILRB2       | 5.29 | 6.09 | 4.55 |
| RAB3IL1      | 5.29 | 5.80 | 4.88 |
| NCAPH2       | 5.29 | 5.97 | 4.82 |
| TATDN3       | 5.29 | 5.59 | 4.87 |
| LZTS1        | 5.29 | 5.62 | 4.98 |
| SPATA13-AS1  | 5.29 | 5.85 | 4.58 |
| A1BG         | 5.29 | 5.46 | 5.07 |
| B3GNT6       | 5.29 | 5.59 | 4.84 |
| LRP8         | 5.29 | 5.64 | 4.81 |
| CTNNBIP1     | 5.29 | 5.55 | 5.04 |
| LOC90784     | 5.29 | 5.67 | 4.97 |
| FAM83C-AS1   | 5.29 | 5.96 | 4.68 |
| VASH1        | 5.29 | 5.68 | 4.96 |
| MCM2         | 5.29 | 5.50 | 4.99 |
| GLYCTK-AS1   | 5.29 | 5.59 | 4.77 |
| SATB2        | 5.29 | 6.25 | 4.67 |
| SLC2A12      | 5.29 | 6.08 | 4.07 |
| GSTM4        | 5.29 | 5.76 | 4.98 |
| NICN1-AS1    | 5.29 | 5.79 | 4.83 |
| C9orf72      | 5.29 | 6.01 | 4.80 |
| PROSC        | 5.29 | 5.56 | 4.75 |
| CST7         | 5.29 | 5.72 | 4.99 |

|              |      |      |      |
|--------------|------|------|------|
| C2CD4C       | 5.29 | 5.55 | 4.98 |
| CHERP        | 5.29 | 5.63 | 4.92 |
| DIRAS1       | 5.29 | 5.97 | 4.79 |
| KBTBD7       | 5.29 | 5.68 | 4.62 |
| AMDHD2       | 5.29 | 5.53 | 4.92 |
| TAPT1        | 5.29 | 5.64 | 5.10 |
| MAPK8        | 5.29 | 5.82 | 4.55 |
| MORC3        | 5.29 | 5.79 | 4.62 |
| CPLX3        | 5.29 | 5.86 | 4.71 |
| PCDHB4       | 5.29 | 5.85 | 4.23 |
| LDHD         | 5.29 | 5.71 | 4.83 |
| SLC5A2       | 5.29 | 5.66 | 4.88 |
| KHSRP        | 5.29 | 5.66 | 4.77 |
| CYB5R4       | 5.29 | 5.89 | 4.42 |
| ATXN7L2      | 5.29 | 5.55 | 4.87 |
| GALC         | 5.29 | 5.79 | 4.81 |
| YEATS4       | 5.29 | 6.09 | 4.46 |
| OR7E47P      | 5.29 | 5.72 | 4.76 |
| CADPS2       | 5.29 | 5.88 | 4.79 |
| ST3GAL2      | 5.29 | 5.76 | 5.11 |
| PNMA2        | 5.29 | 5.72 | 4.86 |
| ANKRD23      | 5.29 | 5.73 | 5.01 |
| PPP2R3A      | 5.29 | 6.34 | 4.45 |
| CPNE6        | 5.29 | 5.66 | 4.99 |
| STX11        | 5.29 | 5.57 | 5.03 |
| COL23A1      | 5.29 | 5.67 | 4.98 |
| SLC25A43     | 5.29 | 5.65 | 4.90 |
| ARL10        | 5.29 | 5.60 | 4.83 |
| SCARNA27     | 5.29 | 5.73 | 4.79 |
| SLC30A5      | 5.29 | 5.72 | 4.81 |
| LOC100506235 | 5.29 | 5.63 | 4.81 |
| LRRTM2       | 5.29 | 5.81 | 4.58 |
| SMAD9        | 5.28 | 5.68 | 4.54 |
| ATG16L2      | 5.28 | 5.56 | 4.89 |
| WWTR1-AS1    | 5.28 | 5.57 | 4.82 |
| KIAA0922     | 5.28 | 5.85 | 4.67 |
| IFIT3        | 5.28 | 5.78 | 4.84 |
| GPR6         | 5.28 | 5.50 | 5.03 |
| CCBL2        | 5.28 | 5.62 | 4.54 |
| ARMCX2       | 5.28 | 5.56 | 4.73 |
| TMEM159      | 5.28 | 5.63 | 4.57 |
| AUH          | 5.28 | 5.47 | 4.75 |
| ZNF587B      | 5.28 | 5.61 | 4.62 |
| LRRK1        | 5.28 | 5.68 | 4.90 |
| PAXIP1       | 5.28 | 5.56 | 4.80 |
| CMTM7        | 5.28 | 5.63 | 4.97 |
| PTGIR        | 5.28 | 5.56 | 4.79 |
| KLHL8        | 5.28 | 5.83 | 4.91 |
| POMT1        | 5.28 | 5.54 | 4.80 |

|                    |      |      |      |
|--------------------|------|------|------|
| ADCY9              | 5.28 | 5.59 | 4.66 |
| OTTHUMG00000153230 | 5.28 | 5.76 | 4.70 |
| ST7L               | 5.28 | 5.62 | 4.85 |
| L3MBTL3            | 5.28 | 5.68 | 4.87 |
| C11orf30           | 5.28 | 5.57 | 4.78 |
| SPATS2L            | 5.28 | 5.55 | 4.73 |
| PXN                | 5.28 | 5.59 | 4.81 |
| RASGEF1B           | 5.28 | 6.11 | 4.54 |
| FASTKD1            | 5.28 | 5.73 | 4.79 |
| C9orf169           | 5.28 | 5.52 | 4.99 |
| LINC00271          | 5.28 | 5.52 | 4.86 |
| SDCBP2             | 5.28 | 5.71 | 4.97 |
| ZNF267             | 5.28 | 6.42 | 4.32 |
| OTTHUMG00000167979 | 5.28 | 5.68 | 4.53 |
| RASSF4             | 5.28 | 5.74 | 5.00 |
| P2RX4              | 5.28 | 5.78 | 4.69 |
| KLK10              | 5.28 | 5.68 | 4.79 |
| SNORD113-4         | 5.28 | 6.73 | 4.26 |
| MAGI2              | 5.28 | 5.84 | 4.75 |
| CD276              | 5.28 | 6.14 | 4.26 |
| ACTL7B             | 5.28 | 5.79 | 4.85 |
| VSIG2              | 5.28 | 5.87 | 4.82 |
| SNORA71D           | 5.28 | 6.14 | 4.73 |
| TOR1B              | 5.28 | 5.75 | 4.79 |
| ABCB7              | 5.28 | 5.67 | 4.79 |
| MAP1LC3A           | 5.28 | 5.77 | 4.91 |
| KREMEN2            | 5.28 | 5.49 | 5.08 |
| LOC100506314       | 5.28 | 5.75 | 4.66 |
| KIAA1161           | 5.28 | 5.62 | 5.05 |
| C10orf137          | 5.28 | 5.55 | 5.00 |
| ZDHHC19            | 5.28 | 5.72 | 4.88 |
| C2orf53            | 5.28 | 5.70 | 4.88 |
| TNFRSF1B           | 5.28 | 5.59 | 4.69 |
| TRNAI2             | 5.28 | 5.60 | 4.63 |
| PRLH               | 5.28 | 5.71 | 4.80 |
| RGPD4              | 5.28 | 5.53 | 4.92 |
| NTM                | 5.28 | 5.67 | 5.07 |
| LOC729177          | 5.28 | 5.62 | 4.73 |
| SOST               | 5.28 | 5.78 | 4.62 |
| PYGB               | 5.28 | 5.63 | 4.88 |
| ZNHIT6             | 5.28 | 5.84 | 4.73 |
| CHKB-CPT1B         | 5.28 | 5.58 | 4.91 |
| OTTHUMG00000176185 | 5.28 | 5.65 | 4.87 |
| SLC35E2B           | 5.28 | 5.56 | 4.89 |
| PIK3AP1            | 5.28 | 5.72 | 5.00 |
| PPAP2C             | 5.28 | 5.56 | 4.86 |
| OPN4               | 5.28 | 5.77 | 4.94 |
| OTTHUMG00000036214 | 5.28 | 5.54 | 5.05 |
| TMED1              | 5.28 | 5.80 | 4.75 |

|                    |      |      |      |
|--------------------|------|------|------|
| HVCN1              | 5.28 | 5.57 | 4.93 |
| S100A16            | 5.28 | 5.86 | 4.94 |
| OTTHUMG00000019287 | 5.28 | 5.61 | 4.79 |
| DCDC2B             | 5.28 | 5.53 | 4.86 |
| OTTHUMG00000015926 | 5.28 | 5.87 | 4.54 |
| IGFLR1             | 5.28 | 5.62 | 5.02 |
| NMB                | 5.28 | 6.40 | 4.64 |
| GATA3              | 5.28 | 5.56 | 4.86 |
| FCN2               | 5.28 | 5.84 | 4.47 |
| FAM212B            | 5.28 | 5.67 | 4.74 |
| MRPL24             | 5.28 | 5.85 | 5.06 |
| POT1               | 5.28 | 6.09 | 4.71 |
| FBXO33             | 5.28 | 5.69 | 4.74 |
| FLVCR1             | 5.28 | 5.73 | 4.67 |
| OTTHUMG00000168623 | 5.28 | 5.61 | 4.94 |
| MXD1               | 5.28 | 5.68 | 4.73 |
| KLHL24             | 5.28 | 5.66 | 4.79 |
| OTTHUMG00000168666 | 5.28 | 5.96 | 4.62 |
| RNF186             | 5.28 | 5.62 | 5.09 |
| SEMA4B             | 5.28 | 5.41 | 5.12 |
| TLE4               | 5.28 | 5.79 | 5.03 |
| RPP25L             | 5.28 | 5.55 | 5.15 |
| LOC100130370       | 5.28 | 5.59 | 4.89 |
| ANKRD65            | 5.28 | 5.54 | 4.96 |
| MAR9               | 5.28 | 5.52 | 4.94 |
| CLEC18C            | 5.28 | 6.26 | 4.58 |
| CRNDE              | 5.28 | 5.84 | 4.52 |
| IPO4               | 5.28 | 5.50 | 4.98 |
| SNHG7              | 5.28 | 5.67 | 4.97 |
| CCNJ               | 5.27 | 5.76 | 4.85 |
| TARBP1             | 5.27 | 5.72 | 4.59 |
| OTTHUMG00000022472 | 5.27 | 5.74 | 4.73 |
| KHNYN              | 5.27 | 5.61 | 4.90 |
| RNF113B            | 5.27 | 5.63 | 4.99 |
| SLC7A1             | 5.27 | 5.81 | 4.94 |
| VAPB               | 5.27 | 6.04 | 4.65 |
| SMARCD3            | 5.27 | 5.64 | 4.98 |
| NXT1               | 5.27 | 5.58 | 4.98 |
| SLC35D2            | 5.27 | 5.68 | 4.71 |
| NUDT17             | 5.27 | 5.44 | 5.05 |
| ATP5G1             | 5.27 | 5.59 | 4.87 |
| TTR                | 5.27 | 5.75 | 4.97 |
| RHEB               | 5.27 | 5.55 | 4.92 |
| KIR2DL4            | 5.27 | 5.80 | 4.87 |
| NGDN               | 5.27 | 5.52 | 4.91 |
| ULK4               | 5.27 | 5.59 | 4.97 |
| MED6               | 5.27 | 5.62 | 4.95 |
| LOC729603          | 5.27 | 5.73 | 4.53 |
| OTUB1              | 5.27 | 5.86 | 4.78 |



|                    |      |      |      |
|--------------------|------|------|------|
| CREB3L4            | 5.27 | 5.92 | 4.90 |
| PFKL               | 5.27 | 5.57 | 5.07 |
| AHCY               | 5.27 | 5.56 | 4.95 |
| COQ10A             | 5.27 | 5.57 | 5.09 |
| LRRC16B            | 5.27 | 5.77 | 5.04 |
| GTF2IRD2P1         | 5.27 | 5.70 | 4.69 |
| SNORD115-22        | 5.27 | 6.32 | 4.12 |
| C12orf45           | 5.27 | 5.60 | 4.94 |
| MAMDC4             | 5.27 | 5.54 | 4.89 |
| TAF1L              | 5.27 | 5.62 | 5.03 |
| PLXNB1             | 5.27 | 5.78 | 5.06 |
| AKR1C2             | 5.27 | 6.08 | 3.77 |
| PHF8               | 5.27 | 5.57 | 4.81 |
| S1PR2              | 5.27 | 5.80 | 4.68 |
| CAMSAP1            | 5.27 | 5.68 | 4.72 |
| MTMR6              | 5.27 | 5.78 | 4.95 |
| LINC00869          | 5.27 | 5.59 | 4.88 |
| OTTHUMG00000165260 | 5.27 | 6.15 | 4.34 |
| AMBRA1             | 5.27 | 5.65 | 4.91 |
| ARHGAP9            | 5.27 | 5.62 | 4.97 |
| RNF207             | 5.27 | 5.70 | 4.77 |
| EFR3B              | 5.27 | 5.60 | 4.81 |
| C1QTNF7            | 5.27 | 5.56 | 4.88 |
| OTTHUMG00000170972 | 5.27 | 5.49 | 4.94 |
| TMEM190            | 5.27 | 5.70 | 4.89 |
| PRDM2              | 5.27 | 5.77 | 4.91 |
| PRKACB             | 5.27 | 5.64 | 4.73 |
| ZNF687             | 5.27 | 5.83 | 4.48 |
| SPON2              | 5.27 | 5.61 | 4.69 |
| CROCCP2            | 5.27 | 5.88 | 4.81 |
| PARP16             | 5.27 | 5.73 | 4.77 |
| CCL22              | 5.27 | 5.68 | 4.64 |
| LOC728175          | 5.27 | 6.13 | 4.84 |
| STRN4              | 5.27 | 5.55 | 5.01 |
| LOC100505564       | 5.27 | 5.85 | 4.61 |
| CAP2               | 5.27 | 5.88 | 4.48 |
| OTTHUMG00000170566 | 5.27 | 5.66 | 4.90 |
| ZNF559             | 5.27 | 5.58 | 4.99 |
| LTB4R2             | 5.27 | 5.78 | 4.76 |
| CCDC8              | 5.27 | 5.47 | 5.02 |
| RPL7A              | 5.27 | 5.74 | 4.96 |
| ALKBH8             | 5.27 | 5.51 | 5.02 |
| LCLAT1             | 5.27 | 5.83 | 4.88 |
| OTTHUMG00000090402 | 5.27 | 5.54 | 4.90 |
| SAMD1              | 5.27 | 5.61 | 4.99 |
| ENTPD5             | 5.27 | 5.69 | 4.76 |
| MIR4644            | 5.27 | 5.75 | 4.87 |
| GFRA2              | 5.27 | 6.04 | 4.70 |
| OR8U1              | 5.27 | 6.00 | 4.74 |

|              |      |      |      |
|--------------|------|------|------|
| LOC100507557 | 5.27 | 5.67 | 4.82 |
| LOC100129111 | 5.27 | 5.68 | 4.89 |
| TRAPPC9      | 5.27 | 5.49 | 4.97 |
| ZBTB45       | 5.27 | 5.62 | 4.89 |
| CA4          | 5.27 | 5.59 | 4.83 |
| SIRT6        | 5.27 | 5.67 | 4.91 |
| GJC2         | 5.27 | 5.70 | 4.66 |
| MCRS1        | 5.27 | 5.58 | 4.71 |
| CSMD2        | 5.27 | 5.94 | 4.80 |
| LOC100506469 | 5.27 | 5.48 | 4.98 |
| MIR610       | 5.27 | 6.15 | 4.70 |
| IQCG         | 5.27 | 5.76 | 4.76 |
| EMCN         | 5.27 | 6.31 | 3.91 |
| PLD4         | 5.27 | 5.96 | 4.61 |
| UBE2L6       | 5.27 | 5.80 | 4.67 |
| SZT2-AS1     | 5.27 | 5.58 | 4.90 |
| GPR142       | 5.26 | 5.83 | 5.01 |
| TGDS         | 5.26 | 5.75 | 4.49 |
| HCLS1        | 5.26 | 5.91 | 4.81 |
| FOXO4        | 5.26 | 5.44 | 5.05 |
| PGBD2        | 5.26 | 5.54 | 5.06 |
| ZNF202       | 5.26 | 5.65 | 4.99 |
| ABHD6        | 5.26 | 5.57 | 4.95 |
| CASKIN2      | 5.26 | 5.46 | 4.90 |
| RPL13        | 5.26 | 5.70 | 4.67 |
| FAM25E       | 5.26 | 5.93 | 4.68 |
| SLC38A10     | 5.26 | 5.53 | 5.05 |
| OR7C2        | 5.26 | 5.61 | 4.83 |
| PFAS         | 5.26 | 5.53 | 4.87 |
| FAM177A1     | 5.26 | 5.56 | 4.80 |
| RTN4R        | 5.26 | 5.67 | 4.91 |
| SSSCA1-AS1   | 5.26 | 5.64 | 4.72 |
| HEY2         | 5.26 | 5.81 | 4.79 |
| PCBP4        | 5.26 | 5.62 | 4.96 |
| ZC3H18       | 5.26 | 5.68 | 4.66 |
| SSR2         | 5.26 | 5.56 | 4.85 |
| RASD1        | 5.26 | 5.65 | 4.94 |
| SLC25A16     | 5.26 | 5.75 | 4.61 |
| CCNB1        | 5.26 | 6.38 | 4.23 |
| PRIM1        | 5.26 | 5.72 | 4.66 |
| PRDM11       | 5.26 | 5.58 | 4.78 |
| DESI1        | 5.26 | 5.64 | 4.73 |
| ACO2         | 5.26 | 5.60 | 4.29 |
| TERF1        | 5.26 | 5.68 | 4.81 |
| SPRED2       | 5.26 | 5.56 | 4.76 |
| NFAM1        | 5.26 | 5.70 | 4.71 |
| PNMAL1       | 5.26 | 5.68 | 4.82 |
| PLEK         | 5.26 | 5.72 | 4.55 |
| LOC100507283 | 5.26 | 5.73 | 4.82 |

|                    |      |      |      |
|--------------------|------|------|------|
| TADA2A             | 5.26 | 5.69 | 4.84 |
| LOC646471          | 5.26 | 5.62 | 4.74 |
| ABHD11             | 5.26 | 5.49 | 4.92 |
| PRICKLE3           | 5.26 | 5.69 | 5.07 |
| MPV17              | 5.26 | 5.65 | 4.80 |
| PABPC1L2B          | 5.26 | 6.22 | 4.92 |
| LOC646278          | 5.26 | 6.24 | 4.50 |
| MRPL2              | 5.26 | 5.64 | 4.40 |
| LOC100506948       | 5.26 | 6.14 | 4.38 |
| REXO4              | 5.26 | 5.59 | 5.05 |
| OTTHUMG00000155980 | 5.26 | 5.84 | 4.83 |
| FUOM               | 5.26 | 5.69 | 4.68 |
| FAM95A             | 5.26 | 5.79 | 4.42 |
| RELA               | 5.26 | 5.58 | 4.81 |
| SEMA4C             | 5.26 | 5.68 | 4.63 |
| BAIAP3             | 5.26 | 5.72 | 4.93 |
| RPAP1              | 5.26 | 5.74 | 4.94 |
| COQ7               | 5.26 | 5.88 | 4.76 |
| NQO1               | 5.26 | 5.52 | 4.48 |
| CD2                | 5.26 | 5.80 | 4.90 |
| MIRLET7G           | 5.26 | 5.58 | 4.64 |
| RNU7-23P           | 5.26 | 5.74 | 4.40 |
| CLN3               | 5.26 | 5.74 | 4.84 |
| LOC115110          | 5.26 | 5.67 | 5.02 |
| LOC440896          | 5.26 | 5.77 | 4.96 |
| FOXD4L2            | 5.26 | 6.01 | 4.51 |
| FRMD6-AS1          | 5.26 | 5.47 | 4.98 |
| MIR770             | 5.26 | 5.89 | 4.51 |
| OTTHUMG00000152824 | 5.26 | 5.81 | 4.62 |
| ADCK5              | 5.26 | 5.66 | 4.93 |
| ASPDH              | 5.26 | 5.73 | 4.74 |
| OTTHUMG00000150919 | 5.26 | 5.52 | 4.78 |
| EIF2B2             | 5.26 | 5.68 | 4.79 |
| PRSS50             | 5.26 | 5.52 | 4.74 |
| OTTHUMG00000152980 | 5.26 | 6.50 | 4.47 |
| TBC1D9B            | 5.26 | 5.58 | 4.92 |
| COASY              | 5.26 | 5.53 | 4.91 |
| ZNF385D-AS1        | 5.26 | 6.01 | 4.46 |
| SATB1              | 5.26 | 5.57 | 4.80 |
| UBOX5              | 5.26 | 5.51 | 5.03 |
| USB1               | 5.26 | 5.59 | 4.90 |
| PALM               | 5.26 | 5.56 | 5.11 |
| TF                 | 5.26 | 6.46 | 4.48 |
| ZNF792             | 5.26 | 5.58 | 5.09 |
| INSL3              | 5.26 | 5.64 | 4.84 |
| AKR1E2             | 5.26 | 5.85 | 4.94 |
| RP11-309M23.1      | 5.26 | 5.65 | 4.84 |
| HCG21              | 5.26 | 5.88 | 4.89 |
| SH3TC1             | 5.26 | 5.57 | 4.94 |

|              |      |      |      |
|--------------|------|------|------|
| ANXA2P1      | 5.26 | 5.86 | 4.57 |
| GPATCH2      | 5.26 | 5.60 | 4.69 |
| TOE1         | 5.26 | 5.52 | 4.88 |
| SLAMF8       | 5.26 | 5.63 | 5.00 |
| ASIC4        | 5.25 | 5.57 | 4.71 |
| FEZ1         | 5.25 | 5.81 | 4.69 |
| TIMM9        | 5.25 | 5.90 | 4.46 |
| TTBK1        | 5.25 | 5.50 | 5.06 |
| ASPRV1       | 5.25 | 5.53 | 4.91 |
| MAGI1-AS1    | 5.25 | 5.90 | 4.73 |
| SIKE1        | 5.25 | 5.67 | 4.59 |
| MIR933       | 5.25 | 5.78 | 4.65 |
| LZTS3        | 5.25 | 5.65 | 4.93 |
| NUP35        | 5.25 | 5.52 | 4.94 |
| KIF7         | 5.25 | 5.43 | 5.00 |
| COX14        | 5.25 | 5.73 | 4.69 |
| SGIP1        | 5.25 | 6.09 | 4.62 |
| ABCC10       | 5.25 | 5.53 | 4.96 |
| ARID5A       | 5.25 | 5.50 | 5.05 |
| CDX2         | 5.25 | 5.87 | 4.89 |
| FAM91A1      | 5.25 | 5.69 | 4.47 |
| NUDT16P1     | 5.25 | 5.61 | 4.99 |
| PCDHB14      | 5.25 | 5.81 | 4.34 |
| MIR4279      | 5.25 | 6.19 | 4.12 |
| MAOB         | 5.25 | 6.06 | 4.45 |
| TRAFD1       | 5.25 | 5.63 | 4.40 |
| RASSF8-AS1   | 5.25 | 5.85 | 5.03 |
| ZNF706       | 5.25 | 5.55 | 4.86 |
| LOC151009    | 5.25 | 6.20 | 4.27 |
| POLM         | 5.25 | 5.44 | 5.07 |
| LOC100505624 | 5.25 | 5.50 | 5.03 |
| ALKBH2       | 5.25 | 5.58 | 4.88 |
| LINC00637    | 5.25 | 5.53 | 4.97 |
| KDELC1       | 5.25 | 6.35 | 4.39 |
| OSR1         | 5.25 | 5.70 | 4.72 |
| RBM38        | 5.25 | 5.73 | 4.91 |
| FAM167B      | 5.25 | 5.86 | 4.64 |
| AP2A2        | 5.25 | 5.62 | 4.70 |
| TRIM41       | 5.25 | 5.46 | 5.10 |
| MIRLET7DHG   | 5.25 | 5.61 | 4.73 |
| ABHD16B      | 5.25 | 5.65 | 4.85 |
| LINC00476    | 5.25 | 5.57 | 4.96 |
| NUDT16       | 5.25 | 5.73 | 4.50 |
| ZNF626       | 5.25 | 5.76 | 4.63 |
| AATK-AS1     | 5.25 | 5.42 | 4.81 |
| USH1G        | 5.25 | 5.53 | 4.91 |
| ADM          | 5.25 | 6.02 | 4.73 |
| ZBTB2        | 5.25 | 5.75 | 4.30 |
| MVD          | 5.25 | 5.58 | 4.87 |

|                    |      |      |      |
|--------------------|------|------|------|
| FAM27E3            | 5.25 | 6.01 | 4.67 |
| TPPP               | 5.25 | 5.64 | 4.87 |
| OTTHUMG00000170462 | 5.25 | 5.75 | 4.89 |
| OTTHUMG00000162884 | 5.25 | 5.51 | 5.01 |
| RPS12              | 5.25 | 5.63 | 4.56 |
| HDAC5              | 5.25 | 5.49 | 4.82 |
| MTERF              | 5.25 | 6.17 | 4.69 |
| TRIM39-RPP21       | 5.25 | 5.59 | 4.97 |
| FAM63B             | 5.25 | 5.99 | 4.70 |
| C1orf159           | 5.25 | 5.49 | 4.91 |
| CNRIP1             | 5.25 | 5.77 | 4.74 |
| KLF13              | 5.25 | 5.50 | 4.80 |
| MIR589             | 5.25 | 5.59 | 4.83 |
| INE1               | 5.25 | 5.76 | 4.53 |
| TOR2A              | 5.25 | 5.77 | 4.99 |
| TMPO               | 5.25 | 5.77 | 4.87 |
| PRRT2              | 5.25 | 5.77 | 4.70 |
| RNA5SP399          | 5.25 | 5.89 | 4.77 |
| CCDC149            | 5.25 | 5.54 | 4.94 |
| CTBP1              | 5.25 | 5.54 | 4.97 |
| GTF3C5             | 5.25 | 5.72 | 4.83 |
| DMRTC1B            | 5.25 | 5.82 | 4.67 |
| MMP19              | 5.25 | 6.13 | 4.42 |
| FILIP1             | 5.25 | 5.84 | 4.75 |
| LOC100131392       | 5.25 | 5.97 | 4.34 |
| MKS1               | 5.25 | 5.54 | 4.84 |
| MMAB               | 5.25 | 5.47 | 4.87 |
| TARP               | 5.25 | 5.83 | 4.93 |
| PHKG2              | 5.25 | 5.78 | 4.68 |
| LOC100506551       | 5.25 | 5.71 | 4.84 |
| OTTHUMG00000159172 | 5.25 | 5.63 | 4.71 |
| GNRH1              | 5.24 | 5.71 | 4.94 |
| APIP               | 5.24 | 5.73 | 4.69 |
| LOC100507443       | 5.24 | 5.58 | 4.80 |
| FCGR3A             | 5.24 | 6.08 | 4.67 |
| SLC7A7             | 5.24 | 5.70 | 4.56 |
| YIF1B              | 5.24 | 5.44 | 5.08 |
| CSH2               | 5.24 | 5.85 | 4.56 |
| ZNF383             | 5.24 | 6.07 | 4.75 |
| CCDC124            | 5.24 | 5.53 | 5.00 |
| ANKRD18A           | 5.24 | 5.60 | 4.83 |
| FLJ33360           | 5.24 | 5.59 | 4.92 |
| RPS17              | 5.24 | 5.48 | 5.06 |
| MEMO1              | 5.24 | 5.52 | 5.04 |
| TMEM234            | 5.24 | 5.47 | 4.79 |
| OTTHUMG00000163069 | 5.24 | 5.60 | 4.80 |
| KCNK6              | 5.24 | 5.52 | 5.02 |
| IGKV3-7            | 5.24 | 5.62 | 4.89 |
| MIR187             | 5.24 | 6.07 | 4.66 |

|                    |      |      |      |
|--------------------|------|------|------|
| CCDC85A            | 5.24 | 5.80 | 4.60 |
| LOC401037          | 5.24 | 5.56 | 4.96 |
| ZNF503             | 5.24 | 5.57 | 4.85 |
| SVEP1              | 5.24 | 5.90 | 4.47 |
| MIR662             | 5.24 | 5.72 | 4.93 |
| AVL9               | 5.24 | 5.71 | 4.69 |
| ELN                | 5.24 | 5.65 | 4.80 |
| RNU6-50            | 5.24 | 5.71 | 4.81 |
| ALDH1A1            | 5.24 | 7.18 | 3.89 |
| SERINC4            | 5.24 | 5.47 | 4.67 |
| KRTAP12-4          | 5.24 | 5.64 | 4.58 |
| NDUFC2-KCTD14      | 5.24 | 5.42 | 4.77 |
| LYPLA1             | 5.24 | 5.80 | 4.83 |
| ZNHIT2             | 5.24 | 5.56 | 4.98 |
| FLJ41423           | 5.24 | 5.63 | 4.84 |
| USP31              | 5.24 | 5.39 | 5.08 |
| KIAA0895L          | 5.24 | 5.39 | 4.98 |
| HDGF               | 5.24 | 5.58 | 4.81 |
| ATP9B              | 5.24 | 5.54 | 4.71 |
| CIDECF             | 5.24 | 5.79 | 4.92 |
| ANKRD20A3          | 5.24 | 5.47 | 4.85 |
| ARL8B              | 5.24 | 5.88 | 4.41 |
| LOC392621          | 5.24 | 5.90 | 4.87 |
| DGKA               | 5.24 | 5.68 | 4.95 |
| SLC20A2            | 5.24 | 5.57 | 4.56 |
| CYP2B7P1           | 5.24 | 5.97 | 4.11 |
| SLC19A2            | 5.24 | 5.92 | 4.23 |
| YPEL1              | 5.24 | 5.53 | 4.66 |
| ZNHIT1             | 5.24 | 5.54 | 4.96 |
| PLEKHG3            | 5.24 | 5.48 | 4.85 |
| OTTHUMG00000152058 | 5.24 | 5.56 | 4.93 |
| SIRT3              | 5.24 | 5.58 | 4.84 |
| CDIP1              | 5.24 | 5.71 | 4.85 |
| DOM3Z              | 5.24 | 5.39 | 4.83 |
| FAM216A            | 5.24 | 5.68 | 4.44 |
| CC2D1B             | 5.24 | 5.77 | 4.83 |
| MIR4725            | 5.24 | 5.93 | 4.55 |
| MYL5               | 5.24 | 5.56 | 4.86 |
| ADNP2              | 5.24 | 5.64 | 4.76 |
| ANKRD33B           | 5.24 | 5.59 | 4.75 |
| DAZAP1             | 5.24 | 5.76 | 4.58 |
| ZSCAN25            | 5.24 | 5.78 | 4.66 |
| PIGM               | 5.24 | 5.62 | 4.53 |
| PCTP               | 5.24 | 5.49 | 4.89 |
| CSRP2BP            | 5.24 | 5.56 | 4.89 |
| OTTHUMG00000164137 | 5.24 | 5.69 | 4.81 |
| ZNF181             | 5.24 | 5.60 | 4.73 |
| MED20              | 5.24 | 5.54 | 4.87 |
| SLC38A8            | 5.24 | 5.66 | 4.66 |

|                    |      |      |      |
|--------------------|------|------|------|
| DVL2               | 5.24 | 5.69 | 4.84 |
| TDRD7              | 5.24 | 5.63 | 4.78 |
| OTTHUMG00000168366 | 5.24 | 5.72 | 4.15 |
| ZMYM4-AS1          | 5.24 | 5.80 | 3.98 |
| FAM122A            | 5.24 | 5.50 | 4.79 |
| LRRC40             | 5.24 | 5.83 | 4.44 |
| NSDHL              | 5.24 | 5.62 | 4.64 |
| CPEB2              | 5.24 | 6.07 | 4.17 |
| PELP1              | 5.24 | 5.62 | 4.65 |
| MRGPRE             | 5.24 | 5.72 | 5.05 |
| LINC00505          | 5.24 | 6.03 | 4.79 |
| KIAA1407           | 5.23 | 5.50 | 4.96 |
| WHSC1              | 5.23 | 5.77 | 4.79 |
| GNA12              | 5.23 | 5.49 | 4.90 |
| FHL2               | 5.23 | 6.04 | 4.74 |
| KISS1              | 5.23 | 5.68 | 4.67 |
| RABGGTA            | 5.23 | 5.60 | 4.90 |
| GUSBP5             | 5.23 | 5.57 | 4.72 |
| OTTHUMG00000040701 | 5.23 | 6.03 | 3.53 |
| COQ6               | 5.23 | 5.57 | 4.51 |
| TRANK1             | 5.23 | 5.77 | 4.97 |
| SPON1              | 5.23 | 6.24 | 4.40 |
| OTTHUMG00000164913 | 5.23 | 5.68 | 4.68 |
| ZNF154             | 5.23 | 5.55 | 4.75 |
| MYL6B              | 5.23 | 5.61 | 4.94 |
| ISOC1              | 5.23 | 5.42 | 4.82 |
| USP6NL             | 5.23 | 5.84 | 4.57 |
| HFE                | 5.23 | 5.61 | 4.67 |
| RTKN               | 5.23 | 5.51 | 4.88 |
| XPO4               | 5.23 | 5.70 | 4.56 |
| ZNF525             | 5.23 | 5.71 | 4.84 |
| BATF2              | 5.23 | 5.94 | 4.87 |
| AFF2               | 5.23 | 5.75 | 4.94 |
| CHPF               | 5.23 | 5.62 | 4.75 |
| RPL32              | 5.23 | 5.75 | 4.68 |
| INTS7              | 5.23 | 5.74 | 4.56 |
| TRMT10C            | 5.23 | 5.76 | 4.45 |
| ME3                | 5.23 | 5.61 | 4.96 |
| OTTHUMG00000151900 | 5.23 | 5.67 | 4.92 |
| LOC101060198       | 5.23 | 6.04 | 4.39 |
| CTSE               | 5.23 | 5.73 | 4.89 |
| CLDN18             | 5.23 | 5.51 | 4.91 |
| TTC28              | 5.23 | 5.65 | 4.51 |
| TBC1D8B            | 5.23 | 5.83 | 4.73 |
| LOC100128131       | 5.23 | 5.61 | 4.68 |
| LOC100996344       | 5.23 | 5.68 | 4.78 |
| SORL1              | 5.23 | 6.44 | 4.75 |
| OTTHUMG00000155590 | 5.23 | 5.90 | 4.75 |
| THAP11             | 5.23 | 5.62 | 4.71 |

|                     |      |      |      |
|---------------------|------|------|------|
| URGCP               | 5.23 | 5.39 | 4.91 |
| OTTHUMG00000019174  | 5.23 | 6.11 | 4.68 |
| SLC27A1             | 5.23 | 5.61 | 4.95 |
| GPR108              | 5.23 | 5.69 | 4.86 |
| ZNF565              | 5.23 | 5.56 | 4.76 |
| TLE2                | 5.23 | 5.69 | 4.74 |
| ZHX1-C8ORF76        | 5.23 | 5.54 | 4.74 |
| PLCD3               | 5.23 | 5.65 | 4.76 |
| OTTHUMG000000171577 | 5.23 | 5.97 | 4.57 |
| MAPK12              | 5.23 | 5.65 | 4.93 |
| MOSPD2              | 5.23 | 5.85 | 4.57 |
| NOL12               | 5.23 | 5.39 | 5.07 |
| UMPS                | 5.23 | 5.64 | 4.69 |
| CASP8               | 5.23 | 5.70 | 4.80 |
| MBD3L2              | 5.23 | 5.89 | 4.83 |
| SF3B2               | 5.23 | 5.52 | 4.79 |
| IPO13               | 5.23 | 5.54 | 4.87 |
| PRICKLE1            | 5.23 | 5.81 | 4.89 |
| CEBPG               | 5.23 | 5.73 | 4.35 |
| DAB2IP              | 5.23 | 5.64 | 4.96 |
| RPS2P32             | 5.23 | 5.74 | 4.65 |
| FANCA               | 5.23 | 5.47 | 5.08 |
| PCDHB16             | 5.23 | 5.90 | 3.75 |
| RPS14               | 5.23 | 5.44 | 4.76 |
| TBX21               | 5.23 | 5.68 | 4.76 |
| PLEKHA8             | 5.23 | 5.59 | 4.48 |
| LOC100507373        | 5.23 | 5.51 | 4.81 |
| DIABLO              | 5.23 | 5.52 | 4.79 |
| DTX2                | 5.23 | 5.71 | 4.67 |
| PDZK1IP1            | 5.23 | 5.66 | 4.88 |
| CORO7-PAM16         | 5.23 | 5.67 | 4.74 |
| ZNF558              | 5.23 | 5.73 | 4.91 |
| ERGIC1              | 5.23 | 5.74 | 4.72 |
| RABEP2              | 5.23 | 5.64 | 4.88 |
| RNF187              | 5.23 | 5.59 | 4.89 |
| AGPAT2              | 5.23 | 5.58 | 5.01 |
| HIF1AN              | 5.23 | 5.72 | 4.67 |
| GSPT2               | 5.23 | 5.61 | 4.77 |
| TUBB3               | 5.23 | 6.02 | 4.46 |
| FRAT2               | 5.23 | 5.54 | 4.88 |
| SLC16A7             | 5.23 | 5.98 | 4.80 |
| PIK3R5              | 5.23 | 5.63 | 4.95 |
| AGPAT3              | 5.23 | 5.49 | 4.66 |
| SLC36A4             | 5.23 | 5.72 | 4.56 |
| OTTHUMG00000043709  | 5.23 | 5.58 | 4.89 |
| CDK5                | 5.23 | 5.70 | 4.78 |
| FAM131A             | 5.23 | 5.44 | 4.90 |
| PFDN4               | 5.23 | 5.61 | 4.88 |
| NAA20               | 5.23 | 5.82 | 4.47 |



|                     |      |      |      |
|---------------------|------|------|------|
| EPHB3               | 5.23 | 5.84 | 4.74 |
| ZNF630              | 5.23 | 5.64 | 4.65 |
| OTTHUMG00000012131  | 5.22 | 5.63 | 4.34 |
| C1orf226            | 5.22 | 5.67 | 4.87 |
| SERPINB8            | 5.22 | 5.73 | 4.88 |
| SNORD115-1          | 5.22 | 6.05 | 4.63 |
| HOXC-AS1            | 5.22 | 5.69 | 4.80 |
| SHROOM1             | 5.22 | 5.56 | 5.00 |
| WDR86               | 5.22 | 5.64 | 4.92 |
| FLJ42875            | 5.22 | 5.58 | 4.99 |
| CADM1               | 5.22 | 6.26 | 3.90 |
| TNRC6C-AS1          | 5.22 | 5.52 | 4.88 |
| SHROOM4             | 5.22 | 5.65 | 4.86 |
| SIMC1               | 5.22 | 5.55 | 4.94 |
| CGNL1               | 5.22 | 5.63 | 4.94 |
| PFKM                | 5.22 | 5.48 | 5.05 |
| LY6G6E              | 5.22 | 5.67 | 4.60 |
| SCARB1              | 5.22 | 5.63 | 4.78 |
| LOC100288123        | 5.22 | 5.60 | 4.91 |
| GALT                | 5.22 | 5.64 | 4.70 |
| SNRPE               | 5.22 | 5.66 | 4.81 |
| TP53BP2             | 5.22 | 5.76 | 4.66 |
| SYNE3               | 5.22 | 5.41 | 5.00 |
| GLI2                | 5.22 | 5.60 | 4.79 |
| UCHL5               | 5.22 | 5.75 | 4.47 |
| SMAD3               | 5.22 | 5.66 | 4.93 |
| CLASRP              | 5.22 | 5.73 | 4.76 |
| GGPS1               | 5.22 | 5.59 | 4.87 |
| ZNF683              | 5.22 | 5.51 | 4.85 |
| C17orf103           | 5.22 | 5.70 | 4.81 |
| FAM35A              | 5.22 | 6.13 | 4.50 |
| ING3                | 5.22 | 5.45 | 4.70 |
| OR1M1               | 5.22 | 6.18 | 4.84 |
| SSH3                | 5.22 | 5.60 | 4.99 |
| MTRR                | 5.22 | 5.43 | 4.96 |
| USP12               | 5.22 | 5.71 | 4.16 |
| IGANRP              | 5.22 | 6.09 | 4.90 |
| MTFMT               | 5.22 | 5.59 | 4.62 |
| OTTHUMG000000168229 | 5.22 | 6.03 | 4.89 |
| KRI1                | 5.22 | 5.54 | 4.79 |
| MAP2K7              | 5.22 | 5.42 | 4.75 |
| MIR3132             | 5.22 | 5.61 | 4.86 |
| ANKMY2              | 5.22 | 5.89 | 4.45 |
| CDCA5               | 5.22 | 5.63 | 4.72 |
| TBRG4               | 5.22 | 5.49 | 4.72 |
| LRRC29              | 5.22 | 5.98 | 4.77 |
| SLC16A1             | 5.22 | 6.15 | 4.53 |
| TFF3                | 5.22 | 5.83 | 4.96 |
| PSD                 | 5.22 | 5.61 | 4.79 |

|                    |      |      |      |
|--------------------|------|------|------|
| NUCB2              | 5.22 | 5.57 | 4.90 |
| LAMA5              | 5.22 | 5.57 | 4.92 |
| ENTPD6             | 5.22 | 5.35 | 5.06 |
| MIR30C1            | 5.22 | 5.73 | 4.73 |
| ZNF716             | 5.22 | 5.79 | 4.59 |
| SNAI3              | 5.22 | 5.58 | 4.84 |
| RAVER2             | 5.22 | 5.73 | 4.77 |
| ALG1L9P            | 5.22 | 5.58 | 4.83 |
| OPN1MW2            | 5.22 | 5.65 | 4.80 |
| POTEJ              | 5.22 | 5.72 | 4.65 |
| GBP3               | 5.22 | 6.13 | 4.24 |
| LOC643837          | 5.22 | 5.55 | 5.01 |
| LOC100130111       | 5.22 | 5.60 | 4.75 |
| LRRC46             | 5.22 | 5.59 | 4.80 |
| LRRTM4             | 5.22 | 5.63 | 4.91 |
| SLFNL1-AS1         | 5.22 | 5.53 | 4.98 |
| GGTLC1             | 5.22 | 5.73 | 4.74 |
| RRNAD1             | 5.22 | 5.45 | 5.06 |
| ZNF740             | 5.22 | 5.43 | 4.95 |
| MICALCL            | 5.22 | 5.50 | 4.85 |
| NFKBIE             | 5.22 | 5.80 | 4.77 |
| CA2                | 5.22 | 5.77 | 4.63 |
| FRMD6              | 5.22 | 5.94 | 4.23 |
| OTTHUMG00000002044 | 5.22 | 5.60 | 4.69 |
| RNASE7             | 5.22 | 5.60 | 4.65 |
| CPPED1             | 5.22 | 5.64 | 4.75 |
| STGC3              | 5.22 | 5.65 | 4.75 |
| CLN6               | 5.22 | 5.67 | 4.82 |
| ATP9A              | 5.22 | 5.64 | 4.81 |
| LOC285577          | 5.22 | 5.53 | 4.77 |
| GLA                | 5.22 | 5.72 | 4.49 |
| AMIGO1             | 5.22 | 5.45 | 4.87 |
| LOC283887          | 5.22 | 5.71 | 4.98 |
| Orai2              | 5.22 | 5.68 | 4.84 |
| MYRIP              | 5.22 | 5.59 | 4.87 |
| MIR645             | 5.22 | 5.71 | 4.62 |
| MAP3K6             | 5.22 | 5.53 | 4.95 |
| SDSL               | 5.22 | 5.80 | 4.69 |
| PSENN              | 5.22 | 6.16 | 4.70 |
| MSH2               | 5.22 | 5.69 | 4.77 |
| SGTA               | 5.22 | 5.48 | 4.75 |
| ZNF438             | 5.22 | 5.59 | 4.76 |
| FAIM2              | 5.22 | 5.38 | 5.01 |
| CCDC101            | 5.22 | 5.50 | 4.72 |
| OTTHUMG00000153023 | 5.22 | 5.52 | 4.89 |
| C12orf4            | 5.22 | 5.77 | 4.40 |
| TBC1D10C           | 5.22 | 5.59 | 4.71 |
| PMCHL2             | 5.22 | 5.67 | 4.75 |
| OTTHUMG00000159376 | 5.21 | 5.77 | 4.82 |

|                    |      |      |      |
|--------------------|------|------|------|
| COX18              | 5.21 | 5.50 | 4.95 |
| ATP11A             | 5.21 | 5.51 | 4.96 |
| CEP72              | 5.21 | 5.50 | 4.66 |
| C19orf12           | 5.21 | 5.45 | 4.94 |
| PRKX               | 5.21 | 6.21 | 4.52 |
| LPAR2              | 5.21 | 5.51 | 4.87 |
| SYT17              | 5.21 | 5.63 | 4.76 |
| HCCS               | 5.21 | 5.82 | 4.25 |
| GNL1               | 5.21 | 5.44 | 5.02 |
| SLC2A6             | 5.21 | 5.77 | 4.71 |
| HCG15              | 5.21 | 5.57 | 4.91 |
| TLCD1              | 5.21 | 5.41 | 4.98 |
| LEPR               | 5.21 | 5.79 | 4.90 |
| CBLL1              | 5.21 | 5.58 | 4.88 |
| TSHZ2              | 5.21 | 5.68 | 4.75 |
| KRTAP9-4           | 5.21 | 5.69 | 4.84 |
| TRIM26             | 5.21 | 5.49 | 4.93 |
| TH                 | 5.21 | 5.70 | 4.86 |
| C1orf138           | 5.21 | 5.55 | 4.81 |
| MSTO1              | 5.21 | 5.75 | 4.87 |
| SNORA38            | 5.21 | 5.53 | 4.77 |
| TTC38              | 5.21 | 5.40 | 4.98 |
| ORAI1              | 5.21 | 5.59 | 4.56 |
| PLA2G16            | 5.21 | 5.81 | 4.66 |
| TFPI               | 5.21 | 5.85 | 4.22 |
| MYBBP1A            | 5.21 | 5.61 | 4.92 |
| EXOSC3             | 5.21 | 5.62 | 4.55 |
| KRTCAP3            | 5.21 | 5.47 | 4.85 |
| SEMA3F             | 5.21 | 5.44 | 4.85 |
| LOC100505794       | 5.21 | 5.55 | 4.83 |
| BPNT1              | 5.21 | 5.74 | 4.59 |
| OTTHUMG00000164729 | 5.21 | 5.48 | 4.83 |
| CDH24              | 5.21 | 5.63 | 4.37 |
| RALGDS             | 5.21 | 5.82 | 4.89 |
| GTF2F1             | 5.21 | 5.69 | 4.89 |
| GK5                | 5.21 | 5.64 | 4.36 |
| MATK               | 5.21 | 5.59 | 5.02 |
| LRRC8A             | 5.21 | 5.57 | 4.91 |
| WWC3               | 5.21 | 6.08 | 4.60 |
| OTTHUMG00000164266 | 5.21 | 6.04 | 4.26 |
| FAM188A            | 5.21 | 5.53 | 4.66 |
| TCEAL4             | 5.21 | 5.37 | 5.02 |
| FOXO6              | 5.21 | 5.55 | 5.02 |
| RHBDF1             | 5.21 | 5.52 | 4.58 |
| KDM6B              | 5.21 | 5.52 | 4.99 |
| MCM9               | 5.21 | 5.38 | 4.80 |
| IGLL5              | 5.21 | 5.80 | 4.82 |
| ANKRD13B           | 5.21 | 5.50 | 4.86 |
| RANBP1             | 5.21 | 5.52 | 4.79 |

|                    |      |      |      |
|--------------------|------|------|------|
| FBP1               | 5.21 | 6.92 | 4.19 |
| PCDHGB8P           | 5.21 | 6.08 | 4.74 |
| PRR13              | 5.21 | 5.44 | 4.77 |
| FAM193B            | 5.21 | 5.46 | 4.48 |
| MED30              | 5.21 | 5.69 | 4.83 |
| ZBTB17             | 5.21 | 5.63 | 4.74 |
| COX17              | 5.21 | 5.55 | 4.68 |
| RNASEH2B           | 5.21 | 5.56 | 4.80 |
| GALM               | 5.21 | 5.95 | 4.10 |
| MLLT3              | 5.21 | 5.81 | 4.79 |
| ZNF641             | 5.21 | 5.58 | 4.68 |
| GPC6-AS1           | 5.21 | 6.12 | 4.27 |
| SBDSP1             | 5.21 | 5.44 | 4.81 |
| USP38              | 5.21 | 5.66 | 4.89 |
| CBWD6              | 5.21 | 5.58 | 4.86 |
| PPP1R3F            | 5.21 | 5.61 | 4.93 |
| SEC22C             | 5.21 | 5.45 | 4.91 |
| GPR75              | 5.21 | 5.45 | 4.96 |
| CLK2P              | 5.21 | 6.36 | 4.32 |
| CAD                | 5.21 | 5.43 | 4.92 |
| NOC3L              | 5.21 | 5.70 | 4.39 |
| OTTHUMG00000151038 | 5.21 | 5.80 | 4.84 |
| IGF1R              | 5.21 | 5.53 | 4.85 |
| UBE2C              | 5.21 | 5.83 | 4.52 |
| ARHGAP39           | 5.21 | 5.58 | 4.95 |
| AQP11              | 5.21 | 5.46 | 4.89 |
| YAF2               | 5.21 | 5.71 | 4.49 |
| GPHN               | 5.21 | 5.49 | 4.62 |
| SCAMP5             | 5.21 | 5.73 | 4.91 |
| ZNF212             | 5.21 | 5.45 | 4.96 |
| ATP4A              | 5.21 | 5.58 | 4.80 |
| ARRB2              | 5.21 | 6.13 | 4.78 |
| LSS                | 5.21 | 5.43 | 4.95 |
| EMC2               | 5.20 | 5.80 | 4.47 |
| GEMIN4             | 5.20 | 5.63 | 4.80 |
| NCF1C              | 5.20 | 5.86 | 4.26 |
| FAM170B            | 5.20 | 5.64 | 4.58 |
| DFFB               | 5.20 | 5.35 | 4.99 |
| PMVK               | 5.20 | 5.51 | 4.75 |
| PRAMEF13           | 5.20 | 5.81 | 4.64 |
| KIF23              | 5.20 | 5.78 | 4.64 |
| PPM1F              | 5.20 | 5.61 | 4.92 |
| FHOD1              | 5.20 | 5.76 | 4.85 |
| OMP                | 5.20 | 5.58 | 4.85 |
| UCK2               | 5.20 | 5.53 | 5.00 |
| CNKSR2             | 5.20 | 5.78 | 4.46 |
| SCD5               | 5.20 | 5.69 | 5.03 |
| ITPK1              | 5.20 | 5.46 | 4.91 |
| LMX1B              | 5.20 | 5.52 | 4.79 |

|                    |      |      |      |
|--------------------|------|------|------|
| STARD5             | 5.20 | 5.59 | 4.55 |
| GDF7               | 5.20 | 5.58 | 4.76 |
| LOC400707          | 5.20 | 5.61 | 4.68 |
| FRG1               | 5.20 | 5.74 | 4.54 |
| LINC00864          | 5.20 | 5.57 | 4.96 |
| BRMS1L             | 5.20 | 5.57 | 4.89 |
| IFIT5              | 5.20 | 5.98 | 4.52 |
| NDUFA6-AS1         | 5.20 | 5.54 | 4.95 |
| OTTHUMG00000160551 | 5.20 | 5.65 | 4.89 |
| PHLDA3             | 5.20 | 5.52 | 4.83 |
| ST3GAL4            | 5.20 | 5.82 | 4.97 |
| SV2A               | 5.20 | 5.59 | 4.55 |
| CRELD1             | 5.20 | 5.79 | 4.92 |
| CRYL1              | 5.20 | 5.79 | 4.37 |
| PBLD               | 5.20 | 5.51 | 4.97 |
| OTTHUMG00000162371 | 5.20 | 5.79 | 4.58 |
| POLD1              | 5.20 | 5.60 | 4.81 |
| GARNL3             | 5.20 | 5.48 | 4.79 |
| LRP2BP             | 5.20 | 5.60 | 4.75 |
| WDR89              | 5.20 | 5.53 | 4.70 |
| C7orf43            | 5.20 | 5.47 | 4.84 |
| COX6C              | 5.20 | 5.38 | 4.87 |
| CDKN1A             | 5.20 | 5.83 | 4.72 |
| NFS1               | 5.20 | 5.46 | 4.90 |
| RAB33A             | 5.20 | 6.00 | 4.67 |
| ZNF205-AS1         | 5.20 | 6.10 | 4.32 |
| B3GNTL1            | 5.20 | 5.48 | 4.82 |
| RP9                | 5.20 | 5.52 | 4.80 |
| SOGA2              | 5.20 | 5.43 | 4.84 |
| GDF15              | 5.20 | 5.51 | 4.85 |
| TMEM114            | 5.20 | 5.75 | 4.83 |
| ARHGAP32           | 5.20 | 6.00 | 4.77 |
| ZNF577             | 5.20 | 5.71 | 4.74 |
| ZNF596             | 5.20 | 5.65 | 4.77 |
| C4orf46            | 5.20 | 5.62 | 4.91 |
| PCSK4              | 5.20 | 5.49 | 4.98 |
| CD300A             | 5.20 | 5.61 | 4.75 |
| TPRA1              | 5.20 | 5.39 | 4.88 |
| OASL               | 5.20 | 5.80 | 4.91 |
| GPT                | 5.20 | 5.47 | 4.75 |
| SPNS2              | 5.20 | 5.61 | 4.44 |
| CCDC85B            | 5.20 | 5.92 | 4.81 |
| UPF3B              | 5.20 | 5.70 | 4.74 |
| SMOX               | 5.20 | 5.68 | 4.84 |
| CPOX               | 5.20 | 5.69 | 4.64 |
| LOC100507066       | 5.20 | 5.76 | 4.72 |
| CERS6-AS1          | 5.20 | 5.76 | 4.22 |
| FAM215B            | 5.20 | 5.77 | 4.49 |
| OTTHUMG00000169240 | 5.20 | 5.99 | 4.65 |

|                    |      |      |      |
|--------------------|------|------|------|
| FLJ13197           | 5.20 | 5.65 | 4.76 |
| MTMR1              | 5.20 | 5.41 | 4.85 |
| RNA5SP92           | 5.20 | 6.05 | 4.42 |
| PCDHGA6            | 5.20 | 5.63 | 4.79 |
| TRBV6-4            | 5.20 | 5.93 | 4.61 |
| UBE2O              | 5.20 | 5.47 | 4.91 |
| C1QL3              | 5.20 | 5.69 | 4.16 |
| GDF5OS             | 5.20 | 5.89 | 4.75 |
| DHX35              | 5.20 | 5.47 | 4.80 |
| CXCL2              | 5.20 | 5.81 | 4.50 |
| HCG14              | 5.20 | 5.63 | 4.58 |
| DSCAML1            | 5.20 | 5.63 | 4.83 |
| ACSM2B             | 5.20 | 5.74 | 4.81 |
| SNORA27            | 5.20 | 5.62 | 4.62 |
| PPP6R2             | 5.20 | 5.71 | 4.89 |
| RBBP5              | 5.20 | 5.58 | 4.45 |
| AFF3               | 5.20 | 5.55 | 4.63 |
| HAPLN3             | 5.20 | 5.80 | 4.34 |
| TSGA10IP           | 5.20 | 5.51 | 4.86 |
| OGG1               | 5.20 | 5.45 | 4.90 |
| KIF19              | 5.20 | 5.65 | 4.82 |
| RAI1-AS1           | 5.20 | 5.42 | 4.80 |
| RNU7-49P           | 5.20 | 5.76 | 4.25 |
| SPDL1              | 5.20 | 6.09 | 4.53 |
| PPOX               | 5.19 | 5.73 | 4.87 |
| OTTHUMG00000159993 | 5.19 | 5.63 | 4.78 |
| SPATA20            | 5.19 | 5.43 | 4.89 |
| LRFN4              | 5.19 | 5.54 | 4.88 |
| RNY4P17            | 5.19 | 6.17 | 3.18 |
| OTTHUMG00000169072 | 5.19 | 5.55 | 4.38 |
| LRRC14             | 5.19 | 5.47 | 4.93 |
| PMM1               | 5.19 | 5.64 | 4.53 |
| LEUTX              | 5.19 | 5.51 | 4.55 |
| BAIAP2             | 5.19 | 5.44 | 4.80 |
| PRORS1P            | 5.19 | 5.45 | 4.81 |
| WDR47              | 5.19 | 5.83 | 4.70 |
| LINC00658          | 5.19 | 6.75 | 4.41 |
| MROH5              | 5.19 | 5.69 | 4.74 |
| SPNS3              | 5.19 | 5.51 | 4.44 |
| CTSF               | 5.19 | 5.49 | 4.79 |
| OTTHUMG00000153914 | 5.19 | 5.95 | 3.89 |
| IPPK               | 5.19 | 5.57 | 4.78 |
| NIP7               | 5.19 | 6.10 | 4.05 |
| PCMT1              | 5.19 | 5.75 | 4.45 |
| ENO2               | 5.19 | 6.03 | 4.32 |
| THAP8              | 5.19 | 5.50 | 4.89 |
| FITM1              | 5.19 | 5.67 | 4.73 |
| BMF                | 5.19 | 5.48 | 4.72 |
| OTTHUMG00000163567 | 5.19 | 5.72 | 4.78 |

|                           |      |      |      |
|---------------------------|------|------|------|
| <i>PTPRF</i>              | 5.19 | 5.39 | 4.90 |
| <i>KIAA0232</i>           | 5.19 | 5.67 | 4.66 |
| <i>SAMD11</i>             | 5.19 | 5.47 | 4.97 |
| <i>TANC1</i>              | 5.19 | 5.65 | 4.86 |
| <i>DLGAP1-AS5</i>         | 5.19 | 6.01 | 4.71 |
| <i>DNPEP</i>              | 5.19 | 5.55 | 4.84 |
| <i>SLC27A4</i>            | 5.19 | 5.68 | 4.53 |
| <i>CACNA1C</i>            | 5.19 | 5.69 | 4.86 |
| <i>IRAK2</i>              | 5.19 | 5.38 | 4.96 |
| <i>SLC38A7</i>            | 5.19 | 5.48 | 4.87 |
| <i>NUCB1-AS1</i>          | 5.19 | 5.45 | 4.95 |
| <i>SYNE2</i>              | 5.19 | 5.77 | 4.90 |
| <i>OSBPL5</i>             | 5.19 | 5.56 | 4.91 |
| <i>PITPNC1</i>            | 5.19 | 5.70 | 4.75 |
| <i>ANKS1A</i>             | 5.19 | 5.67 | 4.83 |
| <i>MRPL45P2</i>           | 5.19 | 5.44 | 4.97 |
| <i>OTTHUMG00000020086</i> | 5.19 | 5.79 | 3.69 |
| <i>MFSD12</i>             | 5.19 | 5.37 | 4.68 |
| <i>FBXO46</i>             | 5.19 | 5.50 | 4.67 |
| <i>RNA5SP229</i>          | 5.19 | 5.93 | 3.71 |
| <i>NLRC5</i>              | 5.19 | 5.39 | 4.81 |
| <i>PHGDH</i>              | 5.19 | 5.39 | 5.00 |
| <i>SYNJ2</i>              | 5.19 | 5.79 | 4.41 |
| <i>RINL</i>               | 5.19 | 5.70 | 4.81 |
| <i>PHYKPL</i>             | 5.19 | 5.52 | 4.79 |
| <i>SCARNA9L</i>           | 5.19 | 6.17 | 4.23 |
| <i>TRPV2</i>              | 5.19 | 5.56 | 5.02 |
| <i>PVRL2</i>              | 5.19 | 5.56 | 4.91 |
| <i>B3GAT2</i>             | 5.19 | 5.54 | 4.67 |
| <i>ZIC1</i>               | 5.19 | 5.95 | 4.54 |
| <i>LINC00350</i>          | 5.19 | 5.69 | 4.80 |
| <i>ZNF217</i>             | 5.19 | 5.55 | 4.76 |
| <i>IQCA1</i>              | 5.19 | 5.90 | 4.54 |
| <i>YRDC</i>               | 5.19 | 5.47 | 4.63 |
| <i>LINC00847</i>          | 5.19 | 5.40 | 5.00 |
| <i>CMIP</i>               | 5.19 | 5.99 | 4.82 |
| <i>OTTHUMG00000153690</i> | 5.19 | 5.61 | 4.90 |
| <i>HMGXB3</i>             | 5.19 | 5.93 | 4.42 |
| <i>ASNS</i>               | 5.19 | 5.61 | 4.79 |
| <i>CRADD</i>              | 5.19 | 5.47 | 4.84 |
| <i>KCNS2</i>              | 5.19 | 5.64 | 4.72 |
| <i>BST1</i>               | 5.19 | 5.43 | 4.86 |
| <i>TPSD1</i>              | 5.19 | 5.69 | 4.84 |
| <i>CCDC153</i>            | 5.19 | 5.66 | 4.42 |
| <i>TAS2R4</i>             | 5.19 | 5.42 | 4.75 |
| <i>TMEM204</i>            | 5.19 | 5.91 | 4.60 |
| <i>RRP12</i>              | 5.19 | 5.38 | 4.87 |
| <i>OR7E91P</i>            | 5.19 | 5.68 | 4.42 |
| <i>RXRA</i>               | 5.19 | 5.37 | 4.94 |

|              |      |      |      |
|--------------|------|------|------|
| SUMO4        | 5.19 | 5.56 | 4.53 |
| NMRAL1       | 5.19 | 5.69 | 4.56 |
| TMEM9B-AS1   | 5.19 | 5.59 | 4.75 |
| TBC1D7       | 5.19 | 5.59 | 4.69 |
| TOM1L1       | 5.19 | 5.38 | 4.96 |
| RBM12B       | 5.19 | 5.50 | 4.61 |
| PPP2R5B      | 5.19 | 5.44 | 4.82 |
| MAATS1       | 5.19 | 5.65 | 4.68 |
| ASB7         | 5.19 | 5.68 | 4.21 |
| TMEM199      | 5.18 | 5.40 | 4.98 |
| BSDC1        | 5.18 | 5.52 | 4.62 |
| TAP2         | 5.18 | 5.40 | 4.88 |
| ELAC1        | 5.18 | 5.47 | 4.84 |
| LOC100506374 | 5.18 | 5.76 | 4.71 |
| LINC00883    | 5.18 | 5.50 | 5.01 |
| PLK1         | 5.18 | 5.56 | 4.82 |
| DLG3-AS1     | 5.18 | 5.72 | 4.60 |
| AIPL1        | 5.18 | 5.65 | 4.81 |
| LOC728065    | 5.18 | 5.70 | 4.85 |
| IFT52        | 5.18 | 5.52 | 4.82 |
| MBIP         | 5.18 | 5.61 | 4.78 |
| MTMR4        | 5.18 | 5.63 | 4.90 |
| OR2T11       | 5.18 | 5.83 | 4.65 |
| RP9P         | 5.18 | 5.56 | 4.78 |
| CAPN1        | 5.18 | 5.63 | 4.82 |
| EHMT1-IT1    | 5.18 | 5.33 | 5.01 |
| LRRC1        | 5.18 | 5.48 | 4.65 |
| CYP21A2      | 5.18 | 5.51 | 4.96 |
| NIPSNAP3A    | 5.18 | 5.69 | 4.51 |
| SLC22A18     | 5.18 | 5.34 | 5.01 |
| LOC285857    | 5.18 | 5.58 | 4.68 |
| NGB          | 5.18 | 5.65 | 4.80 |
| HMGCR        | 5.18 | 5.78 | 4.79 |
| LRRC37A3     | 5.18 | 6.19 | 4.53 |
| RFWD3        | 5.18 | 5.57 | 4.83 |
| PIP5K1C      | 5.18 | 5.54 | 4.92 |
| CDT1         | 5.18 | 5.39 | 4.93 |
| LINC00840    | 5.18 | 5.77 | 4.62 |
| NRM          | 5.18 | 5.44 | 4.59 |
| PCCA         | 5.18 | 5.51 | 4.70 |
| ACAP3        | 5.18 | 5.57 | 4.62 |
| MIR34A       | 5.18 | 5.51 | 4.85 |
| MST1P2       | 5.18 | 5.42 | 4.90 |
| ATL1         | 5.18 | 5.49 | 4.70 |
| DENND6B      | 5.18 | 5.68 | 4.84 |
| FLJ42627     | 5.18 | 5.58 | 4.65 |
| ITGB4        | 5.18 | 5.60 | 4.52 |
| PLAC8L1      | 5.18 | 5.49 | 4.80 |
| GPR27        | 5.18 | 5.53 | 4.64 |



|                    |      |      |      |
|--------------------|------|------|------|
| ZNF826P            | 5.18 | 5.64 | 4.56 |
| NADK2-AS1          | 5.18 | 5.72 | 4.65 |
| OTTHUMG00000164200 | 5.18 | 5.42 | 4.78 |
| LOC646938          | 5.18 | 5.49 | 4.91 |
| CD82               | 5.18 | 5.62 | 4.72 |
| SNORD111           | 5.18 | 6.17 | 4.08 |
| RBPMS2             | 5.18 | 5.45 | 4.63 |
| CBR3-AS1           | 5.18 | 6.00 | 4.69 |
| ARMC7              | 5.18 | 5.76 | 4.94 |
| TMEM215            | 5.18 | 5.39 | 4.87 |
| BCRP2              | 5.18 | 5.50 | 4.72 |
| SLC32A1            | 5.18 | 5.67 | 4.77 |
| SNORA28            | 5.18 | 5.84 | 4.10 |
| LACRT              | 5.18 | 5.76 | 4.83 |
| XRRA1              | 5.18 | 5.57 | 4.71 |
| ATG2A              | 5.18 | 5.37 | 4.97 |
| UBE2J2             | 5.18 | 5.47 | 4.91 |
| SNORD11            | 5.18 | 5.76 | 4.48 |
| HNF4A              | 5.18 | 5.50 | 4.86 |
| MAN1B1             | 5.18 | 5.38 | 4.99 |
| PINX1              | 5.18 | 5.52 | 4.80 |
| GRIK5              | 5.18 | 5.42 | 4.93 |
| MRPL22             | 5.18 | 5.77 | 4.73 |
| OTTHUMG00000164125 | 5.18 | 5.60 | 4.63 |
| SYNJ2-IT1          | 5.18 | 6.16 | 4.76 |
| LRP4               | 5.18 | 5.67 | 4.55 |
| ZNF710             | 5.18 | 5.58 | 4.94 |
| EMBP1              | 5.18 | 6.09 | 4.52 |
| WDTC1              | 5.18 | 5.35 | 4.88 |
| GCFC2              | 5.18 | 5.47 | 4.53 |
| CCDC129            | 5.18 | 6.03 | 4.02 |
| LOC100289019       | 5.18 | 5.44 | 4.89 |
| FAM110A            | 5.18 | 5.33 | 4.60 |
| ZNF346             | 5.18 | 5.45 | 4.37 |
| LCE6A              | 5.18 | 5.81 | 4.67 |
| BRSK2              | 5.18 | 5.67 | 4.84 |
| ZBTB16             | 5.18 | 6.15 | 4.42 |
| ZNF333             | 5.18 | 5.45 | 4.84 |
| SNAP47             | 5.18 | 5.45 | 4.86 |
| SSX4B              | 5.18 | 5.88 | 4.69 |
| PTPRU              | 5.18 | 5.46 | 4.99 |
| LOC100506934       | 5.18 | 5.84 | 4.87 |
| FAHD1              | 5.17 | 5.56 | 4.74 |
| TAF3               | 5.17 | 5.48 | 4.86 |
| SEC22A             | 5.17 | 5.50 | 4.74 |
| SERGEF             | 5.17 | 5.53 | 4.82 |
| NPHP1              | 5.17 | 5.51 | 4.70 |
| CKMT2              | 5.17 | 5.34 | 4.95 |
| LOC155060          | 5.17 | 5.40 | 4.96 |

|                    |      |      |      |
|--------------------|------|------|------|
| XAGE2              | 5.17 | 5.48 | 4.84 |
| LOC100506557       | 5.17 | 5.71 | 4.48 |
| OLFML1             | 5.17 | 5.70 | 4.72 |
| LINC00467          | 5.17 | 5.47 | 4.86 |
| CPSF3L             | 5.17 | 5.46 | 4.71 |
| THOP1              | 5.17 | 5.64 | 4.62 |
| PNMA6C             | 5.17 | 5.39 | 4.90 |
| MTSS1L             | 5.17 | 5.78 | 4.59 |
| EGLN3              | 5.17 | 5.68 | 4.76 |
| DDX55              | 5.17 | 5.43 | 4.77 |
| IGF2-AS            | 5.17 | 5.44 | 4.64 |
| ESPN               | 5.17 | 5.54 | 4.62 |
| CES2               | 5.17 | 5.55 | 4.74 |
| GSTO2              | 5.17 | 5.55 | 4.42 |
| TSNARE1            | 5.17 | 5.43 | 4.77 |
| C2orf42            | 5.17 | 5.51 | 4.73 |
| ZNF239             | 5.17 | 5.46 | 4.69 |
| OTTHUMG00000151393 | 5.17 | 5.55 | 4.62 |
| MRGBP              | 5.17 | 5.63 | 4.31 |
| PRMT7              | 5.17 | 5.40 | 4.87 |
| BZW2               | 5.17 | 5.56 | 4.77 |
| LOC100132813       | 5.17 | 5.63 | 4.42 |
| SNORD105B          | 5.17 | 5.84 | 4.59 |
| OTTHUMG00000086303 | 5.17 | 5.61 | 4.81 |
| GGH                | 5.17 | 5.64 | 4.66 |
| RBBP8NL            | 5.17 | 5.69 | 4.77 |
| WNT16              | 5.17 | 5.73 | 4.90 |
| PKNOX2             | 5.17 | 5.64 | 4.53 |
| ERI1               | 5.17 | 5.51 | 4.63 |
| CNP                | 5.17 | 5.60 | 4.86 |
| CADM4              | 5.17 | 5.55 | 4.73 |
| OR10G3             | 5.17 | 6.00 | 4.57 |
| KRT37              | 5.17 | 5.58 | 4.72 |
| SNORD114-7         | 5.17 | 6.82 | 3.99 |
| DEFA4              | 5.17 | 5.55 | 4.85 |
| MAK16              | 5.17 | 5.71 | 4.73 |
| FAM122C            | 5.17 | 5.40 | 4.95 |
| PSMD9              | 5.17 | 5.69 | 4.64 |
| LOC100129722       | 5.17 | 5.52 | 4.75 |
| C2orf44            | 5.17 | 5.45 | 4.93 |
| PHLPP2             | 5.17 | 5.59 | 4.78 |
| INTS12             | 5.17 | 5.55 | 4.81 |
| OTTHUMG00000178502 | 5.17 | 5.57 | 4.62 |
| LINC00668          | 5.17 | 5.51 | 4.91 |
| T                  | 5.17 | 5.56 | 4.92 |
| APH1A              | 5.17 | 5.53 | 4.71 |
| DCLK1              | 5.17 | 6.03 | 4.36 |
| BAP1               | 5.17 | 5.56 | 4.51 |
| PKNOX1             | 5.17 | 5.68 | 4.69 |

|                    |      |      |      |
|--------------------|------|------|------|
| PYCR2              | 5.17 | 5.52 | 4.82 |
| OR2M3              | 5.17 | 6.03 | 4.62 |
| RFNG               | 5.17 | 5.57 | 4.66 |
| ARL4A              | 5.17 | 5.41 | 4.79 |
| LARGE              | 5.17 | 5.50 | 4.76 |
| EEF1A2             | 5.17 | 5.57 | 4.90 |
| AP1S1              | 5.17 | 5.79 | 4.78 |
| TBC1D9             | 5.17 | 5.67 | 4.34 |
| ISCU               | 5.17 | 5.50 | 4.72 |
| SYT12              | 5.17 | 5.78 | 4.71 |
| LOC286437          | 5.17 | 5.62 | 4.36 |
| EXOC3L1            | 5.17 | 5.56 | 4.86 |
| LCE4A              | 5.17 | 5.59 | 4.79 |
| ROBO2              | 5.17 | 5.76 | 4.83 |
| OTTHUMG00000163595 | 5.17 | 5.78 | 4.49 |
| DOC2GP             | 5.17 | 5.72 | 4.82 |
| BRPF3              | 5.17 | 5.51 | 4.53 |
| CCDC132            | 5.17 | 5.60 | 4.51 |
| OTTHUMG00000168706 | 5.17 | 5.71 | 4.80 |
| RFC3               | 5.17 | 5.43 | 4.74 |
| LOC100216545       | 5.17 | 5.60 | 4.93 |
| HOXC8              | 5.16 | 5.46 | 4.88 |
| LOC100130547       | 5.16 | 5.55 | 4.70 |
| RFX2               | 5.16 | 5.48 | 4.72 |
| COMMD2             | 5.16 | 5.97 | 3.71 |
| FLJ40288           | 5.16 | 5.66 | 4.42 |
| MCM5               | 5.16 | 5.38 | 4.94 |
| LOC100130887       | 5.16 | 5.52 | 4.66 |
| PCDHB5             | 5.16 | 5.63 | 4.56 |
| HCRT               | 5.16 | 5.52 | 4.75 |
| C5orf38            | 5.16 | 5.54 | 4.82 |
| ZSCAN21            | 5.16 | 5.55 | 4.58 |
| PIGP               | 5.16 | 5.78 | 4.59 |
| HOXD11             | 5.16 | 5.79 | 4.57 |
| FN3K               | 5.16 | 5.37 | 4.93 |
| ZSCAN32            | 5.16 | 5.52 | 4.89 |
| ACBD5              | 5.16 | 5.70 | 4.63 |
| CRY2               | 5.16 | 5.50 | 4.85 |
| NANOS1             | 5.16 | 5.52 | 4.27 |
| ZNF776             | 5.16 | 5.73 | 4.55 |
| JMJD4              | 5.16 | 5.47 | 4.47 |
| SMYD3              | 5.16 | 6.30 | 4.38 |
| CD300E             | 5.16 | 5.73 | 4.62 |
| QPCTL              | 5.16 | 5.46 | 4.88 |
| DGKD               | 5.16 | 5.50 | 4.87 |
| PARP8              | 5.16 | 5.54 | 4.55 |
| PDZK1P1            | 5.16 | 5.47 | 4.90 |
| AGBL5              | 5.16 | 5.49 | 4.83 |
| HIP1R              | 5.16 | 5.51 | 4.93 |

|                    |      |      |      |
|--------------------|------|------|------|
| RHOG               | 5.16 | 5.56 | 4.66 |
| TACC3              | 5.16 | 5.53 | 4.65 |
| FOSB               | 5.16 | 5.78 | 4.59 |
| ZBTB41             | 5.16 | 6.09 | 4.11 |
| COPS8              | 5.16 | 5.71 | 4.72 |
| SALL4              | 5.16 | 5.55 | 4.85 |
| MIR541             | 5.16 | 5.59 | 4.83 |
| OTTHUMG00000020443 | 5.16 | 5.54 | 4.84 |
| BTBD7              | 5.16 | 5.81 | 4.23 |
| ATP13A1            | 5.16 | 5.41 | 4.94 |
| MIR27A             | 5.16 | 5.76 | 4.92 |
| TMEM79             | 5.16 | 5.32 | 5.00 |
| LINC00630          | 5.16 | 5.83 | 4.58 |
| HOXA10             | 5.16 | 5.34 | 4.97 |
| TERC               | 5.16 | 5.70 | 4.45 |
| SERPINE3           | 5.16 | 5.40 | 4.91 |
| MBD1               | 5.16 | 5.76 | 4.76 |
| CLDN15             | 5.16 | 5.37 | 4.87 |
| EFNB1              | 5.16 | 5.52 | 4.72 |
| LOC100271832       | 5.16 | 5.90 | 4.70 |
| C5orf51            | 5.16 | 5.61 | 4.55 |
| TMEM161A           | 5.16 | 5.32 | 4.98 |
| OTTHUMG00000151344 | 5.16 | 5.55 | 4.81 |
| ZFPL1              | 5.16 | 5.42 | 4.80 |
| OTTHUMG00000158828 | 5.16 | 5.62 | 4.43 |
| ARPC1B             | 5.16 | 5.68 | 4.55 |
| CREBRF             | 5.16 | 5.80 | 4.53 |
| COL7A1             | 5.16 | 5.73 | 4.70 |
| ZNF576             | 5.16 | 5.40 | 4.91 |
| LPP                | 5.16 | 5.90 | 4.00 |
| PTHLH              | 5.16 | 6.42 | 3.97 |
| FAM49B             | 5.16 | 5.76 | 4.88 |
| BARHL2             | 5.16 | 5.72 | 4.79 |
| SMARCD2            | 5.16 | 5.39 | 4.99 |
| PTRH1              | 5.16 | 5.53 | 4.87 |
| LOC100129434       | 5.16 | 6.16 | 4.14 |
| EPOR               | 5.16 | 5.51 | 4.88 |
| ASTE1              | 5.16 | 5.69 | 4.87 |
| GTF2IRD1           | 5.16 | 5.45 | 4.86 |
| GCHFR              | 5.16 | 5.45 | 5.01 |
| KRT42P             | 5.16 | 5.54 | 4.76 |
| RNU6-71P           | 5.16 | 5.75 | 3.89 |
| MDGA1              | 5.16 | 5.48 | 4.85 |
| BCL6B              | 5.16 | 5.71 | 4.38 |
| C1orf170           | 5.16 | 5.53 | 4.65 |
| CDCA7L             | 5.16 | 5.47 | 4.70 |
| LOC100506746       | 5.16 | 5.35 | 4.98 |
| TRAPPC12           | 5.16 | 5.61 | 4.79 |
| SENP2              | 5.16 | 5.52 | 4.95 |

|                    |      |      |      |
|--------------------|------|------|------|
| SF3B4              | 5.16 | 5.70 | 4.40 |
| RGMA               | 5.16 | 5.45 | 4.67 |
| HRSP12             | 5.16 | 5.78 | 4.62 |
| ZNF75A             | 5.15 | 5.62 | 3.88 |
| SNORD116-5         | 5.15 | 6.01 | 4.48 |
| NCBP2              | 5.15 | 5.47 | 4.81 |
| TRMT1              | 5.15 | 5.42 | 4.73 |
| OTTHUMG00000165543 | 5.15 | 6.60 | 4.13 |
| MRGPRG             | 5.15 | 5.55 | 4.87 |
| PARP1              | 5.15 | 5.39 | 4.86 |
| MIR139             | 5.15 | 5.50 | 4.85 |
| ARHGEF39           | 5.15 | 5.44 | 4.87 |
| SLC35A3            | 5.15 | 5.46 | 4.79 |
| LOC100508120       | 5.15 | 5.61 | 4.64 |
| OTTHUMG00000151895 | 5.15 | 5.55 | 4.54 |
| LOC728613          | 5.15 | 5.55 | 4.57 |
| MS4A8              | 5.15 | 5.54 | 4.71 |
| C21orf62           | 5.15 | 5.70 | 4.73 |
| C12orf65           | 5.15 | 5.68 | 4.81 |
| FRMD3              | 5.15 | 5.57 | 4.50 |
| ZNF205             | 5.15 | 5.88 | 4.68 |
| LOC100509196       | 5.15 | 5.43 | 4.86 |
| NUTM2G             | 5.15 | 5.49 | 4.88 |
| NOP9               | 5.15 | 5.41 | 4.83 |
| SSPN               | 5.15 | 5.50 | 4.89 |
| ZNF234             | 5.15 | 5.47 | 4.45 |
| ENGASE             | 5.15 | 5.45 | 4.83 |
| LPHN1              | 5.15 | 5.45 | 4.84 |
| SEMA4A             | 5.15 | 5.40 | 4.95 |
| FKBP1B             | 5.15 | 5.52 | 4.72 |
| TRAJ59             | 5.15 | 7.68 | 3.92 |
| PYY2               | 5.15 | 5.92 | 4.75 |
| LINC00340          | 5.15 | 5.96 | 4.35 |
| SH3BP5L            | 5.15 | 5.56 | 4.64 |
| LOC399829          | 5.15 | 5.61 | 4.72 |
| LOC339240          | 5.15 | 5.63 | 4.85 |
| SMIM12             | 5.15 | 5.57 | 4.82 |
| RNY5P5             | 5.15 | 5.70 | 4.73 |
| RNF220             | 5.15 | 5.61 | 4.75 |
| ATP2A3             | 5.15 | 5.39 | 4.72 |
| CKAP2              | 5.15 | 5.88 | 4.31 |
| ABHD14B            | 5.15 | 5.41 | 4.91 |
| CCDC134            | 5.15 | 5.42 | 4.83 |
| CD36               | 5.15 | 6.49 | 3.60 |
| NOP2               | 5.15 | 5.47 | 4.72 |
| CTIF               | 5.15 | 5.53 | 4.73 |
| NCKAP5L            | 5.15 | 5.57 | 4.72 |
| TTC26              | 5.15 | 5.49 | 5.01 |
| MYO1F              | 5.15 | 5.66 | 4.60 |

|                     |      |      |      |
|---------------------|------|------|------|
| ZNF510              | 5.15 | 5.63 | 4.90 |
| MIR3157             | 5.15 | 5.72 | 4.62 |
| TTC12               | 5.15 | 5.44 | 4.91 |
| SCLT1               | 5.15 | 5.55 | 4.55 |
| IPO5                | 5.15 | 5.44 | 4.83 |
| DTX4                | 5.15 | 5.44 | 4.85 |
| GAL3ST3             | 5.15 | 5.68 | 4.87 |
| C9orf16             | 5.15 | 5.40 | 5.00 |
| CYP2A6              | 5.15 | 5.69 | 4.46 |
| APCDD1L             | 5.15 | 5.81 | 4.72 |
| ADAMTSL4            | 5.15 | 5.41 | 4.92 |
| NDUFC1              | 5.15 | 5.55 | 4.78 |
| ZDHHC2              | 5.15 | 5.38 | 4.78 |
| C11orf57            | 5.15 | 5.56 | 4.74 |
| TEAD4               | 5.15 | 5.51 | 4.69 |
| SPATA1              | 5.15 | 5.62 | 4.66 |
| OTTHUMG00000018570  | 5.15 | 5.55 | 4.65 |
| RPL6                | 5.15 | 5.32 | 5.02 |
| ZNF44               | 5.15 | 5.46 | 4.65 |
| CD1A                | 5.15 | 6.03 | 4.44 |
| IL4I1               | 5.15 | 5.42 | 4.89 |
| CDR2L               | 5.15 | 5.78 | 4.71 |
| LOC100128105        | 5.15 | 5.59 | 4.85 |
| CNST                | 5.15 | 5.56 | 4.16 |
| RPL10               | 5.15 | 5.52 | 4.46 |
| PMPCA               | 5.15 | 5.33 | 4.51 |
| MAPK6               | 5.15 | 5.58 | 4.65 |
| FPGS                | 5.15 | 5.48 | 4.74 |
| ARVCF               | 5.15 | 5.49 | 4.81 |
| LOC440700           | 5.15 | 5.61 | 4.62 |
| PRR21               | 5.15 | 5.71 | 4.41 |
| TARM1               | 5.15 | 5.40 | 4.95 |
| MIR3692             | 5.15 | 5.95 | 4.10 |
| AZI2                | 5.15 | 5.50 | 4.85 |
| LOC154449           | 5.15 | 5.41 | 4.71 |
| ATPAF2              | 5.15 | 5.53 | 4.84 |
| UBALD2              | 5.15 | 5.51 | 4.46 |
| HS3ST1              | 5.15 | 5.35 | 4.79 |
| OTTHUMG000000162503 | 5.15 | 5.53 | 4.85 |
| IGFBP3              | 5.15 | 6.29 | 4.38 |
| TRADD               | 5.15 | 5.50 | 4.82 |
| RAD54B              | 5.15 | 5.45 | 4.60 |
| PLCB1               | 5.15 | 5.85 | 4.45 |
| LGI3                | 5.15 | 5.58 | 4.53 |
| HSFX2               | 5.14 | 5.68 | 4.77 |
| XKR8                | 5.14 | 5.63 | 4.71 |
| MIR4290             | 5.14 | 5.75 | 4.69 |
| NS3BP               | 5.14 | 5.67 | 4.69 |
| ZER1                | 5.14 | 5.62 | 4.92 |

|              |      |      |      |
|--------------|------|------|------|
| SLC29A2      | 5.14 | 5.68 | 4.64 |
| LOC100996619 | 5.14 | 5.62 | 4.51 |
| MBTD1        | 5.14 | 5.61 | 4.76 |
| PIGG         | 5.14 | 5.53 | 4.77 |
| LOC100507136 | 5.14 | 5.53 | 4.57 |
| AHCYL2       | 5.14 | 5.39 | 4.46 |
| GM140        | 5.14 | 6.04 | 4.31 |
| SCGB1A1      | 5.14 | 5.47 | 4.65 |
| RBM45        | 5.14 | 5.54 | 4.45 |
| CDSN         | 5.14 | 5.65 | 4.79 |
| SPATA31A4    | 5.14 | 5.37 | 4.70 |
| ACYP1        | 5.14 | 5.59 | 4.33 |
| C17orf107    | 5.14 | 5.39 | 4.92 |
| LSM5         | 5.14 | 5.48 | 4.89 |
| BAK1         | 5.14 | 5.51 | 4.36 |
| ACTA2-AS1    | 5.14 | 5.58 | 4.69 |
| LINC00346    | 5.14 | 5.54 | 4.75 |
| GPR35        | 5.14 | 5.79 | 4.57 |
| ZFYVE26      | 5.14 | 5.38 | 4.88 |
| AGRN         | 5.14 | 5.56 | 4.79 |
| PET117       | 5.14 | 5.59 | 4.73 |
| ALKBH7       | 5.14 | 5.69 | 4.53 |
| JOSD2        | 5.14 | 5.69 | 4.60 |
| NEURL3       | 5.14 | 5.64 | 4.75 |
| RNF152       | 5.14 | 5.62 | 4.67 |
| SNAI1        | 5.14 | 5.53 | 4.53 |
| NCAPG        | 5.14 | 5.72 | 4.66 |
| TARS2        | 5.14 | 5.63 | 4.64 |
| TAF1C        | 5.14 | 5.39 | 4.82 |
| AXIN2        | 5.14 | 5.45 | 4.81 |
| SOCS4        | 5.14 | 5.59 | 4.72 |
| C9orf24      | 5.14 | 5.77 | 4.69 |
| SENP8        | 5.14 | 5.46 | 4.72 |
| EXOC2        | 5.14 | 5.58 | 4.50 |
| TBX20        | 5.14 | 5.42 | 4.92 |
| FAM60A       | 5.14 | 5.32 | 4.67 |
| CXCL17       | 5.14 | 5.69 | 4.50 |
| RNA5SP321    | 5.14 | 6.45 | 4.18 |
| MIR521-1     | 5.14 | 5.77 | 4.57 |
| FBRSL1       | 5.14 | 5.45 | 4.93 |
| SPATA2L      | 5.14 | 5.59 | 4.59 |
| CHMP7        | 5.14 | 5.74 | 4.61 |
| CCNA2        | 5.14 | 5.87 | 4.47 |
| NCMAP        | 5.14 | 5.68 | 4.70 |
| PSMA1        | 5.14 | 5.51 | 4.68 |
| RPUSD2       | 5.14 | 5.57 | 4.85 |
| FHIT         | 5.14 | 5.67 | 4.87 |
| ZIC5         | 5.14 | 5.65 | 4.69 |
| NINL         | 5.14 | 5.52 | 4.71 |

|                    |      |      |      |
|--------------------|------|------|------|
| NT5DC1             | 5.14 | 5.51 | 4.45 |
| HLCS               | 5.14 | 5.64 | 4.84 |
| SOX10              | 5.14 | 5.36 | 4.92 |
| EXTL3-AS1          | 5.14 | 5.46 | 4.62 |
| C11orf35           | 5.14 | 5.55 | 4.66 |
| APC                | 5.14 | 5.48 | 4.90 |
| TMEM59L            | 5.14 | 5.48 | 4.79 |
| EIF4E              | 5.14 | 5.35 | 4.71 |
| SPATA31A5          | 5.14 | 5.74 | 4.68 |
| KCNJ12             | 5.14 | 5.63 | 4.83 |
| NFASC              | 5.14 | 5.89 | 4.62 |
| BLOC1S4            | 5.14 | 5.47 | 4.76 |
| PARP12             | 5.14 | 5.39 | 4.71 |
| PCDH9              | 5.14 | 5.92 | 4.07 |
| PPP2CB             | 5.14 | 5.77 | 4.83 |
| MASP2              | 5.14 | 5.32 | 4.91 |
| TBC1D2             | 5.14 | 5.76 | 4.62 |
| NOS1AP             | 5.14 | 5.62 | 4.68 |
| CAPN12             | 5.14 | 5.30 | 4.97 |
| SH2D6              | 5.14 | 5.44 | 4.83 |
| OMA1               | 5.14 | 5.64 | 4.33 |
| AIG1               | 5.14 | 5.78 | 4.52 |
| CHAMP1             | 5.14 | 5.59 | 4.80 |
| IFNAR2             | 5.14 | 5.55 | 4.64 |
| OTTHUMG00000151209 | 5.14 | 5.64 | 4.77 |
| CYTH2              | 5.14 | 5.43 | 4.75 |
| CLUHP3             | 5.13 | 5.55 | 4.70 |
| OTTHUMG00000151712 | 5.13 | 5.48 | 4.64 |
| FBXO42             | 5.13 | 5.69 | 4.69 |
| RIPPLY2            | 5.13 | 5.43 | 4.85 |
| STK35              | 5.13 | 5.55 | 4.60 |
| FAM76A             | 5.13 | 5.43 | 4.62 |
| ALDH1B1            | 5.13 | 5.46 | 4.72 |
| MIAT               | 5.13 | 5.38 | 4.81 |
| LOC100507266       | 5.13 | 5.45 | 4.87 |
| OTTHUMG00000015120 | 5.13 | 5.66 | 4.83 |
| ARMCX3-AS1         | 5.13 | 5.71 | 4.55 |
| RBP7               | 5.13 | 6.57 | 3.59 |
| LOC100507548       | 5.13 | 5.60 | 4.51 |
| SLC4A5             | 5.13 | 5.47 | 4.69 |
| ZSCAN22            | 5.13 | 5.34 | 4.57 |
| HIC2               | 5.13 | 5.39 | 4.65 |
| FDXR               | 5.13 | 5.38 | 4.77 |
| E4F1               | 5.13 | 5.40 | 4.77 |
| C20orf24           | 5.13 | 5.30 | 4.85 |
| KITLG              | 5.13 | 6.12 | 4.33 |
| MMP21              | 5.13 | 5.43 | 4.64 |
| RNF123             | 5.13 | 5.31 | 4.86 |
| HSDL2              | 5.13 | 5.59 | 4.64 |



|                    |      |      |      |
|--------------------|------|------|------|
| RGS17              | 5.13 | 5.47 | 4.62 |
| ZNF777             | 5.13 | 5.40 | 4.69 |
| PLP1               | 5.13 | 5.50 | 4.67 |
| RRN3               | 5.13 | 5.44 | 4.61 |
| PAGR1              | 5.13 | 5.40 | 4.71 |
| TMEM138            | 5.13 | 5.52 | 4.66 |
| DGKZ               | 5.13 | 5.43 | 4.84 |
| LPIN1              | 5.13 | 5.32 | 4.88 |
| NUTM2F             | 5.13 | 5.57 | 4.49 |
| SH2D3C             | 5.13 | 5.42 | 4.77 |
| IGLV4-3            | 5.13 | 5.76 | 4.80 |
| KDM4A-AS1          | 5.13 | 5.56 | 4.87 |
| RFX8               | 5.13 | 5.62 | 4.63 |
| KRT17P1            | 5.13 | 5.88 | 4.26 |
| VPS37C             | 5.13 | 5.45 | 4.79 |
| LOC100506737       | 5.13 | 5.48 | 4.74 |
| TMEM150A           | 5.13 | 5.56 | 4.73 |
| RABIF              | 5.13 | 5.54 | 4.74 |
| ZNF34              | 5.13 | 5.42 | 4.68 |
| TTLL11             | 5.13 | 5.60 | 4.53 |
| TRAJ23             | 5.13 | 5.72 | 4.41 |
| OTTHUMG00000177236 | 5.13 | 5.67 | 4.79 |
| SYN1               | 5.13 | 5.36 | 4.77 |
| NADK               | 5.13 | 5.64 | 4.79 |
| GALNT6             | 5.13 | 5.70 | 4.89 |
| STK32C             | 5.13 | 5.58 | 4.77 |
| LOC400684          | 5.13 | 5.72 | 4.37 |
| NUDT7              | 5.13 | 5.61 | 4.40 |
| MIR622             | 5.13 | 5.60 | 4.46 |
| CTU2               | 5.13 | 5.51 | 4.85 |
| OTTHUMG00000067435 | 5.13 | 6.38 | 3.78 |
| PPP1R14B           | 5.13 | 5.37 | 4.77 |
| LOC101060300       | 5.13 | 5.44 | 4.61 |
| OTTHUMG00000171371 | 5.13 | 5.42 | 4.53 |
| LOC440910          | 5.13 | 5.35 | 4.76 |
| GIPC3              | 5.13 | 5.56 | 4.83 |
| SMIM12-AS1         | 5.13 | 5.51 | 4.66 |
| OLA1               | 5.13 | 5.61 | 4.46 |
| LOC100128239       | 5.13 | 5.55 | 4.69 |
| PUF60              | 5.13 | 5.56 | 4.67 |
| HAVCR2             | 5.13 | 5.91 | 4.40 |
| PPP1R3D            | 5.13 | 5.41 | 4.51 |
| ZCCHC8             | 5.13 | 5.41 | 4.79 |
| UCKL1              | 5.13 | 5.44 | 4.74 |
| C14orf79           | 5.13 | 5.57 | 4.69 |
| ARHGAP20           | 5.13 | 5.62 | 4.45 |
| DRAP1              | 5.13 | 5.80 | 4.56 |
| COL9A2             | 5.13 | 5.44 | 4.74 |
| ANAPC15            | 5.13 | 5.50 | 4.76 |

|                    |      |      |      |
|--------------------|------|------|------|
| HS3ST4             | 5.13 | 5.54 | 4.72 |
| ROCK1P1            | 5.13 | 5.75 | 4.63 |
| IFT57              | 5.13 | 5.54 | 4.63 |
| AKR7A2P1           | 5.13 | 5.49 | 4.78 |
| THUMPD1            | 5.13 | 5.46 | 4.50 |
| LSM6               | 5.13 | 5.50 | 4.59 |
| TMEM39B            | 5.13 | 5.39 | 4.75 |
| MRPS31P5           | 5.13 | 5.74 | 4.58 |
| LINC00453          | 5.13 | 5.44 | 4.77 |
| OTTHUMG00000177740 | 5.13 | 5.78 | 4.57 |
| RAB3D              | 5.13 | 5.64 | 3.42 |
| CRELD2             | 5.13 | 5.47 | 4.65 |
| OR10AD1            | 5.13 | 5.91 | 4.43 |
| SNORD124           | 5.13 | 5.76 | 4.70 |
| OTTHUMG00000178442 | 5.13 | 5.86 | 4.13 |
| CCNJL              | 5.13 | 5.41 | 4.83 |
| MYCBP              | 5.13 | 5.46 | 4.65 |
| F11R               | 5.13 | 5.74 | 4.55 |
| CDK5R1             | 5.13 | 5.39 | 4.78 |
| ARHGEF2            | 5.13 | 5.36 | 4.87 |
| ZNF189             | 5.12 | 5.44 | 4.52 |
| RNA5SP255          | 5.12 | 6.24 | 3.95 |
| CALML6             | 5.12 | 5.54 | 4.62 |
| LOC100507144       | 5.12 | 5.95 | 4.71 |
| MIR124-2           | 5.12 | 5.52 | 4.74 |
| MIR7-3HG           | 5.12 | 5.84 | 4.57 |
| OTTHUMG00000048097 | 5.12 | 5.63 | 4.39 |
| TSPYL5             | 5.12 | 5.47 | 4.35 |
| AXIN1              | 5.12 | 5.37 | 4.66 |
| PTPN2              | 5.12 | 5.55 | 4.54 |
| DENND1A            | 5.12 | 5.38 | 4.75 |
| RANGAP1            | 5.12 | 5.62 | 4.73 |
| FLJ44790           | 5.12 | 5.66 | 4.86 |
| AP4M1              | 5.12 | 5.64 | 4.73 |
| CPLX2              | 5.12 | 5.80 | 4.64 |
| DAZL               | 5.12 | 5.78 | 4.68 |
| KDM2B              | 5.12 | 5.35 | 4.96 |
| MICAL3             | 5.12 | 5.44 | 4.70 |
| OTTHUMG00000017631 | 5.12 | 5.79 | 4.67 |
| C17orf76-AS1       | 5.12 | 5.46 | 4.80 |
| OTTHUMG00000150049 | 5.12 | 5.69 | 4.78 |
| NMUR1              | 5.12 | 5.75 | 4.58 |
| C9orf156           | 5.12 | 5.50 | 4.72 |
| CEP70              | 5.12 | 5.68 | 4.64 |
| GDPD5              | 5.12 | 5.34 | 4.81 |
| ADORA1             | 5.12 | 5.54 | 4.81 |
| KBTBD6             | 5.12 | 5.80 | 4.85 |
| TM6SF2             | 5.12 | 5.55 | 4.84 |
| MGME1              | 5.12 | 5.67 | 4.44 |

|              |      |      |      |
|--------------|------|------|------|
| RPL29        | 5.12 | 5.66 | 4.70 |
| TSSK4        | 5.12 | 5.40 | 4.86 |
| PCDH17       | 5.12 | 5.42 | 4.82 |
| RAB9B        | 5.12 | 5.42 | 4.85 |
| HTR2B        | 5.12 | 5.39 | 4.83 |
| ASB8         | 5.12 | 5.46 | 4.80 |
| TRIM53AP     | 5.12 | 5.58 | 4.61 |
| DET1         | 5.12 | 5.41 | 4.81 |
| LOC286370    | 5.12 | 5.60 | 4.82 |
| SNX24        | 5.12 | 5.70 | 4.47 |
| LMTK2        | 5.12 | 5.28 | 4.91 |
| RGS19        | 5.12 | 5.42 | 4.90 |
| HMGCL        | 5.12 | 5.37 | 4.66 |
| FAM197Y9     | 5.12 | 6.62 | 2.79 |
| SETDB2       | 5.12 | 5.39 | 4.81 |
| METTL13      | 5.12 | 5.47 | 4.78 |
| C8orf31      | 5.12 | 5.50 | 4.67 |
| ZC3H7B       | 5.12 | 5.36 | 4.87 |
| TLN2         | 5.12 | 5.28 | 5.04 |
| RNF185       | 5.12 | 5.54 | 4.76 |
| KLK14        | 5.12 | 5.35 | 4.63 |
| PDCD1        | 5.12 | 5.72 | 4.62 |
| APOC4-APOC2  | 5.12 | 5.51 | 4.75 |
| ASIC3        | 5.12 | 5.77 | 4.77 |
| RCAN1        | 5.12 | 6.16 | 4.37 |
| LOC100133612 | 5.12 | 5.47 | 4.74 |
| TCEB3        | 5.12 | 5.57 | 4.72 |
| ZNF658B      | 5.12 | 5.41 | 4.85 |
| QRICH2       | 5.12 | 5.57 | 4.78 |
| ERVK13-1     | 5.12 | 5.61 | 4.43 |
| UCK1         | 5.12 | 5.33 | 4.70 |
| TMEM194A     | 5.12 | 5.62 | 4.68 |
| CRIP2        | 5.12 | 5.48 | 4.68 |
| TPCN1        | 5.12 | 5.67 | 4.83 |
| CHST10       | 5.12 | 5.43 | 4.84 |
| COL20A1      | 5.12 | 5.35 | 4.79 |
| ZFYVE27      | 5.12 | 5.35 | 4.50 |
| DAK          | 5.12 | 5.35 | 4.75 |
| DNAJB2       | 5.12 | 5.51 | 4.81 |
| EXD3         | 5.12 | 5.48 | 4.76 |
| DAGLB        | 5.12 | 5.63 | 4.61 |
| CDKN3        | 5.12 | 6.02 | 4.45 |
| PTPN6        | 5.12 | 5.69 | 4.73 |
| GTF2H3       | 5.12 | 5.64 | 4.81 |
| HAUS5        | 5.12 | 5.36 | 5.00 |
| BAIAP2L2     | 5.12 | 5.50 | 4.70 |
| HMGA1P7      | 5.12 | 5.53 | 4.56 |
| DEFB124      | 5.12 | 5.85 | 4.68 |
| SNORD102     | 5.12 | 5.90 | 4.09 |

|                    |      |      |      |
|--------------------|------|------|------|
| NOTCH3             | 5.12 | 5.55 | 4.80 |
| SCGB3A1            | 5.12 | 5.42 | 4.83 |
| HOXC10             | 5.12 | 5.43 | 4.76 |
| USP13              | 5.12 | 5.42 | 4.89 |
| IMP3               | 5.12 | 5.52 | 4.43 |
| GTPBP6             | 5.12 | 5.58 | 4.55 |
| LOC338799          | 5.12 | 5.53 | 4.88 |
| TUBGCP6            | 5.12 | 5.47 | 4.84 |
| FIG4               | 5.12 | 5.54 | 4.34 |
| MIR4252            | 5.12 | 5.72 | 4.51 |
| MRAP2              | 5.12 | 6.19 | 4.13 |
| LOC400756          | 5.12 | 5.61 | 4.70 |
| OTTHUMG00000162780 | 5.12 | 5.46 | 4.67 |
| C2orf49            | 5.12 | 5.44 | 4.71 |
| FLNB-AS1           | 5.12 | 5.41 | 4.69 |
| OTTHUMG00000159304 | 5.11 | 5.50 | 4.55 |
| PRAF2              | 5.11 | 5.48 | 4.63 |
| UCHL1-AS1          | 5.11 | 5.83 | 4.36 |
| SNORD116-28        | 5.11 | 5.48 | 4.53 |
| ARSG               | 5.11 | 5.76 | 4.76 |
| DPM2               | 5.11 | 5.76 | 4.22 |
| SLC1A1             | 5.11 | 5.64 | 4.25 |
| OTTHUMG00000168451 | 5.11 | 5.40 | 4.77 |
| PRKCH              | 5.11 | 5.45 | 4.60 |
| FAAH               | 5.11 | 5.53 | 4.81 |
| PTPN23             | 5.11 | 5.49 | 4.84 |
| ARHGEF19           | 5.11 | 5.40 | 4.80 |
| MEGF6              | 5.11 | 5.56 | 4.92 |
| CNDP2              | 5.11 | 5.38 | 4.68 |
| RNA5SP360          | 5.11 | 5.89 | 3.75 |
| ANKRD13D           | 5.11 | 5.31 | 4.77 |
| SNRNP25            | 5.11 | 5.65 | 4.49 |
| SYNGR3             | 5.11 | 5.29 | 4.70 |
| LOC729164          | 5.11 | 5.35 | 4.83 |
| ABHD17C            | 5.11 | 5.51 | 4.64 |
| MGST3              | 5.11 | 5.56 | 4.52 |
| TPX2               | 5.11 | 6.10 | 4.44 |
| WDR24              | 5.11 | 5.42 | 4.70 |
| WDR43              | 5.11 | 5.79 | 4.32 |
| TMPPE              | 5.11 | 5.61 | 4.35 |
| RGN                | 5.11 | 5.41 | 4.78 |
| MIR4509-1          | 5.11 | 5.88 | 3.58 |
| NTN1               | 5.11 | 5.53 | 4.63 |
| RNA5SP122          | 5.11 | 5.54 | 4.61 |
| PARP11             | 5.11 | 5.56 | 4.75 |
| ZNF732             | 5.11 | 5.80 | 4.51 |
| KRT85              | 5.11 | 5.77 | 4.66 |
| ZBTB8B             | 5.11 | 5.49 | 4.89 |
| UNC5CL             | 5.11 | 5.36 | 4.62 |

|                    |      |      |      |
|--------------------|------|------|------|
| SNTA1              | 5.11 | 5.53 | 4.57 |
| ZNF71              | 5.11 | 5.42 | 4.66 |
| TBK1               | 5.11 | 5.57 | 4.32 |
| SLC2A5             | 5.11 | 6.06 | 4.53 |
| LIMK1              | 5.11 | 5.29 | 4.72 |
| METTL1             | 5.11 | 5.38 | 4.43 |
| OR8B12             | 5.11 | 5.75 | 4.47 |
| RBM41              | 5.11 | 5.30 | 4.71 |
| CCDC88B            | 5.11 | 5.68 | 4.66 |
| FBXO44             | 5.11 | 5.68 | 4.83 |
| CEP152             | 5.11 | 5.55 | 4.71 |
| LOC339988          | 5.11 | 5.52 | 4.81 |
| RNA5SP268          | 5.11 | 5.85 | 4.05 |
| ETV2               | 5.11 | 5.54 | 4.95 |
| OR52B6             | 5.11 | 5.83 | 4.34 |
| RNY1P8             | 5.11 | 6.01 | 3.20 |
| LPXN               | 5.11 | 5.67 | 4.64 |
| SLC51A             | 5.11 | 5.40 | 4.84 |
| TLE6               | 5.11 | 5.44 | 4.85 |
| LOC100507634       | 5.11 | 5.84 | 4.68 |
| VPS8               | 5.11 | 5.57 | 4.52 |
| OTTHUMG00000156091 | 5.11 | 5.83 | 4.28 |
| SLC6A3             | 5.11 | 5.52 | 4.83 |
| MAGEC2             | 5.11 | 5.52 | 4.75 |
| ACSF3              | 5.11 | 5.45 | 4.78 |
| HOXC9              | 5.11 | 5.67 | 4.56 |
| KCNQ1              | 5.11 | 5.44 | 4.72 |
| MITF               | 5.11 | 5.61 | 4.49 |
| CCDC71             | 5.11 | 5.50 | 4.71 |
| CEP250             | 5.11 | 5.30 | 4.78 |
| CD24               | 5.11 | 5.56 | 4.69 |
| BRI3               | 5.11 | 5.40 | 4.65 |
| FRMPD2P1           | 5.11 | 5.76 | 4.70 |
| TAS2R5             | 5.11 | 5.68 | 4.26 |
| LYRM1              | 5.11 | 5.67 | 4.58 |
| SMIM7              | 5.11 | 5.42 | 4.83 |
| ATXN7L3            | 5.11 | 5.40 | 4.70 |
| TRAJ22             | 5.11 | 5.81 | 4.46 |
| CENPJ              | 5.11 | 5.48 | 4.38 |
| LINC00937          | 5.11 | 5.59 | 4.80 |
| USP19              | 5.11 | 5.39 | 4.75 |
| MIR191             | 5.11 | 5.55 | 4.00 |
| OTTHUMG00000151374 | 5.11 | 5.38 | 4.93 |
| DDX60L             | 5.11 | 5.63 | 4.80 |
| OTTHUMG00000020831 | 5.11 | 5.60 | 4.72 |
| MCTP1              | 5.11 | 5.87 | 4.18 |
| ALDH6A1            | 5.10 | 5.41 | 4.67 |
| PLXNC1             | 5.10 | 5.42 | 4.86 |
| RP2                | 5.10 | 6.06 | 4.24 |

|                    |      |      |      |
|--------------------|------|------|------|
| ZNF322             | 5.10 | 5.55 | 3.99 |
| AUNIP              | 5.10 | 5.46 | 4.83 |
| RAB33B             | 5.10 | 5.71 | 4.56 |
| RFFL               | 5.10 | 5.55 | 4.75 |
| TMEM231            | 5.10 | 5.63 | 4.56 |
| FERD3L             | 5.10 | 5.51 | 4.73 |
| NOS3               | 5.10 | 5.51 | 4.74 |
| HIST1H3F           | 5.10 | 6.01 | 4.24 |
| CLEC2B             | 5.10 | 6.06 | 4.60 |
| PASK               | 5.10 | 5.58 | 4.77 |
| KIAA1984           | 5.10 | 5.39 | 4.74 |
| CRYM               | 5.10 | 5.54 | 4.65 |
| ARSI               | 5.10 | 5.39 | 4.75 |
| HAUS1              | 5.10 | 5.62 | 4.28 |
| RALGPS1            | 5.10 | 5.46 | 4.71 |
| MRRFP1             | 5.10 | 5.61 | 4.40 |
| LRTM1              | 5.10 | 5.64 | 4.58 |
| GPAT2              | 5.10 | 5.47 | 4.83 |
| HAUS3              | 5.10 | 5.41 | 4.72 |
| LOC100128262       | 5.10 | 5.48 | 4.92 |
| FUT6               | 5.10 | 5.57 | 4.38 |
| PRKRA              | 5.10 | 5.40 | 4.79 |
| TVP23B             | 5.10 | 6.22 | 4.56 |
| ORC4               | 5.10 | 5.42 | 4.60 |
| DGCR14             | 5.10 | 5.30 | 4.84 |
| TRIOBP             | 5.10 | 5.54 | 4.84 |
| SNORD59A           | 5.10 | 6.44 | 3.80 |
| ITGAX              | 5.10 | 5.61 | 4.67 |
| SHF                | 5.10 | 5.30 | 4.83 |
| MAP1LC3B           | 5.10 | 5.47 | 4.46 |
| PFN4               | 5.10 | 5.41 | 4.91 |
| TET3               | 5.10 | 6.08 | 4.64 |
| TMEM216            | 5.10 | 5.44 | 4.62 |
| VASN               | 5.10 | 5.35 | 4.85 |
| LRRC42             | 5.10 | 5.53 | 4.41 |
| LOC100130157       | 5.10 | 5.48 | 4.59 |
| UNC45A             | 5.10 | 5.40 | 4.80 |
| PRRT3-AS1          | 5.10 | 5.35 | 4.77 |
| HOXA11             | 5.10 | 5.57 | 4.64 |
| DDX20              | 5.10 | 5.27 | 4.63 |
| ACVR1B             | 5.10 | 5.31 | 4.74 |
| ATP2A1             | 5.10 | 5.64 | 4.55 |
| SLC36A1            | 5.10 | 5.65 | 4.78 |
| EVC2               | 5.10 | 5.64 | 4.73 |
| KLHL2              | 5.10 | 5.49 | 4.73 |
| GALNT8             | 5.10 | 5.93 | 4.05 |
| PPM1J              | 5.10 | 5.69 | 4.72 |
| OTTHUMG00000018553 | 5.10 | 5.64 | 4.54 |
| ACADSB             | 5.10 | 5.52 | 4.69 |

|                    |      |      |      |
|--------------------|------|------|------|
| OSER1              | 5.10 | 5.79 | 4.14 |
| HDAC9              | 5.10 | 5.56 | 4.14 |
| GFER               | 5.10 | 5.29 | 4.96 |
| RBFA               | 5.10 | 5.42 | 4.81 |
| LINC00485          | 5.10 | 5.62 | 4.54 |
| GPRC5A             | 5.10 | 6.06 | 4.40 |
| LOC728716          | 5.10 | 5.55 | 4.63 |
| PITX2              | 5.10 | 5.52 | 4.68 |
| ZNF208             | 5.10 | 5.47 | 4.44 |
| C10orf68           | 5.10 | 5.64 | 4.77 |
| OTTHUMG00000149337 | 5.10 | 6.08 | 4.14 |
| CACNA1H            | 5.10 | 5.61 | 4.66 |
| ZNF589             | 5.10 | 5.27 | 4.78 |
| PLD1               | 5.10 | 5.45 | 4.65 |
| KRTAP10-11         | 5.10 | 5.29 | 4.46 |
| RHOBTB1            | 5.10 | 5.57 | 4.65 |
| PET112             | 5.10 | 5.31 | 4.86 |
| C6orf226           | 5.10 | 5.58 | 4.51 |
| ALG10B             | 5.10 | 6.01 | 4.60 |
| TUBA8              | 5.10 | 5.40 | 4.80 |
| ACTR5              | 5.10 | 5.37 | 4.66 |
| B3GNT9             | 5.10 | 5.52 | 4.70 |
| WDR55              | 5.10 | 5.40 | 4.74 |
| LETM2              | 5.10 | 5.34 | 4.83 |
| RCCD1              | 5.10 | 5.67 | 4.86 |
| C1orf111           | 5.10 | 5.54 | 4.63 |
| LOC100129516       | 5.10 | 5.71 | 4.67 |
| LRCOL1             | 5.10 | 5.47 | 4.67 |
| SLC25A51           | 5.10 | 5.36 | 4.73 |
| TRPM4              | 5.09 | 5.45 | 4.70 |
| GALNT16            | 5.09 | 5.58 | 4.67 |
| LPAR5              | 5.09 | 5.63 | 4.65 |
| SLC22A12           | 5.09 | 5.34 | 4.60 |
| PSRC1              | 5.09 | 5.58 | 4.61 |
| AIM1               | 5.09 | 5.82 | 4.12 |
| OTTHUMG00000179148 | 5.09 | 5.59 | 4.79 |
| PGPEP1             | 5.09 | 5.46 | 4.70 |
| ZFP41              | 5.09 | 5.42 | 4.73 |
| MIER2              | 5.09 | 5.56 | 4.16 |
| OTTHUMG00000169585 | 5.09 | 5.98 | 4.59 |
| ANAPC1             | 5.09 | 5.68 | 4.48 |
| NANOS3             | 5.09 | 5.41 | 4.89 |
| LOC100144597       | 5.09 | 5.34 | 4.75 |
| ERMP1              | 5.09 | 5.54 | 4.82 |
| RGMB               | 5.09 | 5.43 | 4.65 |
| PTDSS1             | 5.09 | 5.87 | 3.99 |
| WSCD2              | 5.09 | 5.52 | 4.65 |
| FAM92A1            | 5.09 | 5.59 | 4.65 |
| ACP2               | 5.09 | 5.50 | 4.73 |

|                    |      |      |      |
|--------------------|------|------|------|
| GAS2L1             | 5.09 | 5.38 | 4.82 |
| NDUFS7             | 5.09 | 5.29 | 4.92 |
| CTDP1              | 5.09 | 5.29 | 4.87 |
| OTTHUMG00000166117 | 5.09 | 5.69 | 4.13 |
| ADAMTS4            | 5.09 | 5.48 | 4.81 |
| SET                | 5.09 | 5.45 | 4.57 |
| RNA5SP425          | 5.09 | 5.68 | 4.32 |
| NOP16              | 5.09 | 5.77 | 4.70 |
| HOXB3              | 5.09 | 5.29 | 4.93 |
| FBXW5              | 5.09 | 5.62 | 4.69 |
| IRAK4              | 5.09 | 5.59 | 4.38 |
| YARS2              | 5.09 | 5.57 | 3.97 |
| RPS6KA1            | 5.09 | 5.50 | 4.80 |
| SSPO               | 5.09 | 5.55 | 4.83 |
| PLLP               | 5.09 | 5.59 | 4.72 |
| APOLD1             | 5.09 | 5.84 | 4.76 |
| CSTF1              | 5.09 | 5.50 | 4.71 |
| PRICKLE2-AS1       | 5.09 | 5.53 | 4.80 |
| GHRL               | 5.09 | 5.49 | 4.71 |
| POFUT2             | 5.09 | 5.38 | 4.76 |
| EMILIN2            | 5.09 | 5.53 | 4.80 |
| TMPO-AS1           | 5.09 | 5.45 | 4.76 |
| FAHD2CP            | 5.09 | 5.40 | 4.44 |
| SHISA3             | 5.09 | 5.62 | 4.75 |
| RFT1               | 5.09 | 5.64 | 4.66 |
| TANGO6             | 5.09 | 5.57 | 4.59 |
| DLEU2L             | 5.09 | 5.76 | 4.47 |
| CCDC113            | 5.09 | 5.48 | 4.69 |
| SCRN3              | 5.09 | 5.51 | 4.57 |
| ZNF432             | 5.09 | 5.49 | 4.30 |
| CACNA2D1           | 5.09 | 5.53 | 4.37 |
| PUS10              | 5.09 | 5.30 | 4.78 |
| HSD11B2            | 5.09 | 5.58 | 4.55 |
| PLEKHM3            | 5.09 | 5.55 | 4.66 |
| HN1L               | 5.09 | 5.45 | 4.44 |
| CBX2               | 5.09 | 5.40 | 4.62 |
| SLC23A3            | 5.09 | 5.37 | 4.57 |
| C1orf51            | 5.09 | 5.46 | 4.80 |
| ROBO3              | 5.09 | 5.45 | 4.88 |
| RCAN3              | 5.09 | 5.68 | 4.14 |
| LGALS8-AS1         | 5.09 | 5.62 | 4.60 |
| AKAP6              | 5.09 | 5.53 | 4.39 |
| CX3CR1             | 5.09 | 5.48 | 4.68 |
| CT45A5             | 5.09 | 5.97 | 4.16 |
| GTF2H4             | 5.09 | 5.63 | 4.46 |
| ZNF493             | 5.09 | 5.96 | 4.73 |
| ZMIZ1-AS1          | 5.09 | 5.71 | 4.82 |
| ZNF789             | 5.09 | 5.47 | 4.53 |
| MC1R               | 5.09 | 5.31 | 4.75 |



|                    |      |      |      |
|--------------------|------|------|------|
| C9orf47            | 5.09 | 5.45 | 4.70 |
| MIR4269            | 5.09 | 5.70 | 4.54 |
| ZFYVE20            | 5.09 | 5.59 | 4.67 |
| NCAN               | 5.09 | 5.70 | 4.73 |
| MIR1200            | 5.09 | 5.48 | 4.45 |
| MRPL10             | 5.09 | 5.44 | 4.76 |
| IP6K1              | 5.09 | 5.43 | 4.29 |
| TUSC1              | 5.09 | 5.27 | 4.81 |
| STK10              | 5.09 | 5.54 | 4.76 |
| GPT2               | 5.08 | 5.51 | 4.75 |
| SCLY               | 5.08 | 5.38 | 4.84 |
| MPP3               | 5.08 | 5.57 | 4.70 |
| LILRA4             | 5.08 | 5.40 | 4.89 |
| SPHK2              | 5.08 | 5.39 | 4.86 |
| GPAM               | 5.08 | 5.32 | 4.89 |
| ZBTB34             | 5.08 | 5.51 | 4.34 |
| HINT3              | 5.08 | 5.57 | 4.56 |
| ZNF664-FAM101A     | 5.08 | 5.29 | 4.88 |
| C10orf25           | 5.08 | 5.52 | 4.61 |
| PTTG2              | 5.08 | 5.59 | 4.68 |
| DCAF4              | 5.08 | 5.61 | 4.57 |
| TRMT1L             | 5.08 | 5.61 | 4.54 |
| PHF7               | 5.08 | 5.18 | 4.85 |
| KCTD1              | 5.08 | 5.39 | 4.84 |
| TTLL10             | 5.08 | 5.51 | 4.85 |
| KIAA0226           | 5.08 | 5.48 | 4.82 |
| MYRF               | 5.08 | 5.35 | 4.79 |
| TMEM45B            | 5.08 | 5.49 | 4.57 |
| ABHD4              | 5.08 | 5.79 | 4.13 |
| TMCC3              | 5.08 | 5.51 | 4.79 |
| LRRC37A            | 5.08 | 5.66 | 4.48 |
| RNA5SP32           | 5.08 | 5.91 | 4.64 |
| MIR143             | 5.08 | 5.63 | 4.65 |
| PPIH               | 5.08 | 5.51 | 4.58 |
| PAX2               | 5.08 | 5.62 | 4.60 |
| CD3EAP             | 5.08 | 5.44 | 4.78 |
| WARS2              | 5.08 | 5.35 | 4.54 |
| OTTHUMG00000086635 | 5.08 | 5.53 | 4.76 |
| LRRC27             | 5.08 | 5.33 | 4.90 |
| TRMT2B             | 5.08 | 5.40 | 4.85 |
| LOC100129931       | 5.08 | 5.35 | 4.78 |
| LOC728228          | 5.08 | 5.78 | 4.60 |
| LRCH4              | 5.08 | 5.41 | 4.80 |
| TECPR2             | 5.08 | 5.35 | 4.75 |
| MIR503             | 5.08 | 5.58 | 4.68 |
| LIPE               | 5.08 | 5.50 | 4.77 |
| MIR2278            | 5.08 | 5.46 | 4.80 |
| TMEM70             | 5.08 | 5.39 | 4.85 |
| JRK                | 5.08 | 5.44 | 4.72 |

|              |      |      |      |
|--------------|------|------|------|
| GNAI1        | 5.08 | 5.34 | 4.62 |
| RAB11B-AS1   | 5.08 | 5.51 | 4.42 |
| TEPP         | 5.08 | 5.36 | 4.64 |
| OSGEPL1-AS1  | 5.08 | 5.53 | 4.37 |
| PHLDB2       | 5.08 | 5.62 | 4.47 |
| SNORD114-12  | 5.08 | 7.56 | 3.15 |
| VSIG10       | 5.08 | 5.40 | 4.77 |
| MYEF2        | 5.08 | 5.50 | 4.67 |
| PLCD4        | 5.08 | 5.52 | 4.80 |
| KAZALD1      | 5.08 | 5.44 | 4.68 |
| KLK1         | 5.08 | 5.45 | 4.84 |
| FANCG        | 5.08 | 5.23 | 4.92 |
| TCEANC2      | 5.08 | 5.43 | 4.84 |
| LPHN2        | 5.08 | 5.93 | 4.36 |
| DPH3P1       | 5.08 | 5.71 | 4.47 |
| JMJD1C-AS1   | 5.08 | 5.42 | 4.57 |
| ATP5S        | 5.08 | 5.45 | 4.46 |
| TXNRD1       | 5.08 | 5.37 | 4.72 |
| SLC25A18     | 5.08 | 5.54 | 4.74 |
| STARD4       | 5.08 | 5.70 | 4.61 |
| GYPE         | 5.08 | 5.57 | 4.34 |
| IRGQ         | 5.08 | 5.41 | 4.80 |
| TRIM24       | 5.08 | 5.34 | 4.57 |
| SLC34A1      | 5.08 | 5.40 | 4.62 |
| KIN          | 5.08 | 5.42 | 4.75 |
| ITGB3BP      | 5.08 | 5.51 | 4.54 |
| COL18A1      | 5.08 | 5.59 | 4.41 |
| ZBTB22       | 5.08 | 5.32 | 4.73 |
| PEX14        | 5.08 | 5.36 | 4.82 |
| CYHR1        | 5.08 | 5.38 | 4.70 |
| LOC100505501 | 5.08 | 5.68 | 4.38 |
| SNORD15B     | 5.08 | 5.62 | 4.45 |
| LOC100507602 | 5.08 | 5.51 | 4.31 |
| ARL4D        | 5.08 | 5.63 | 4.45 |
| DNALI1       | 5.08 | 5.50 | 4.79 |
| ST6GALNAC4   | 5.08 | 5.57 | 4.56 |
| LOC100129831 | 5.08 | 5.26 | 4.86 |
| NMNAT2       | 5.08 | 5.47 | 4.74 |
| PUSL1        | 5.08 | 5.30 | 4.90 |
| DHDH         | 5.08 | 5.59 | 4.61 |
| PTPRK        | 5.08 | 5.76 | 4.11 |
| LINC00568    | 5.08 | 5.44 | 4.62 |
| BMP4         | 5.08 | 5.62 | 4.76 |
| GEMIN6       | 5.08 | 5.49 | 4.72 |
| RNF144B      | 5.08 | 5.70 | 4.48 |
| KCTD15       | 5.08 | 5.34 | 4.51 |
| PRDM8        | 5.08 | 5.75 | 4.52 |
| ACOX3        | 5.08 | 5.40 | 4.77 |
| COMT         | 5.08 | 5.46 | 4.87 |

|                    |      |      |      |
|--------------------|------|------|------|
| LAGE3              | 5.08 | 5.71 | 4.70 |
| C1orf56            | 5.08 | 5.53 | 4.81 |
| DTL                | 5.08 | 5.67 | 4.58 |
| KIAA1147           | 5.08 | 5.51 | 4.79 |
| DTD2               | 5.07 | 5.44 | 4.72 |
| CPE                | 5.07 | 5.94 | 3.47 |
| UTF1               | 5.07 | 5.34 | 4.87 |
| GPR3               | 5.07 | 5.66 | 4.64 |
| LOC283140          | 5.07 | 5.36 | 4.59 |
| USP18              | 5.07 | 5.46 | 4.47 |
| MRPL9              | 5.07 | 5.74 | 4.64 |
| GAL3ST2            | 5.07 | 5.31 | 4.45 |
| CCDC9              | 5.07 | 5.59 | 4.72 |
| ZNF517             | 5.07 | 5.55 | 4.70 |
| KRTAP2-3           | 5.07 | 5.89 | 4.75 |
| RAP1B              | 5.07 | 5.74 | 4.23 |
| NCF1B              | 5.07 | 5.83 | 4.38 |
| GPR42              | 5.07 | 6.23 | 4.35 |
| MIR125A            | 5.07 | 5.64 | 4.74 |
| LOC100131826       | 5.07 | 5.44 | 4.20 |
| IDH3A              | 5.07 | 5.57 | 4.67 |
| PRADC1             | 5.07 | 5.48 | 4.80 |
| THAP9-AS1          | 5.07 | 5.45 | 4.69 |
| PDE1A              | 5.07 | 5.68 | 4.58 |
| SLC24A1            | 5.07 | 5.27 | 4.79 |
| MAST4              | 5.07 | 5.46 | 4.78 |
| APOA2              | 5.07 | 5.37 | 4.71 |
| OTTHUMG00000152702 | 5.07 | 5.47 | 4.72 |
| PTPRC              | 5.07 | 6.59 | 4.00 |
| KBTBD4             | 5.07 | 5.31 | 4.77 |
| MIR1245A           | 5.07 | 6.93 | 3.40 |
| OLFM1              | 5.07 | 5.42 | 4.68 |
| RTBDN              | 5.07 | 5.42 | 4.70 |
| IGLON5             | 5.07 | 5.53 | 4.76 |
| PDE3B              | 5.07 | 5.67 | 4.29 |
| FGF14-AS2          | 5.07 | 5.41 | 4.74 |
| STK32A             | 5.07 | 6.21 | 3.88 |
| FOXRED1            | 5.07 | 6.04 | 4.63 |
| COL24A1            | 5.07 | 5.61 | 4.47 |
| IDNK               | 5.07 | 5.49 | 4.72 |
| RNF44              | 5.07 | 5.33 | 4.58 |
| DTWD2              | 5.07 | 5.54 | 4.59 |
| EFCAB7             | 5.07 | 5.76 | 4.41 |
| FOXD2-AS1          | 5.07 | 5.38 | 4.77 |
| FAM211B            | 5.07 | 5.50 | 4.62 |
| TRAV8-7            | 5.07 | 5.60 | 4.41 |
| FAM131B            | 5.07 | 5.48 | 4.52 |
| CASP9              | 5.07 | 5.27 | 4.68 |
| PDXP               | 5.07 | 5.57 | 4.77 |

|                    |      |      |      |
|--------------------|------|------|------|
| LMF1               | 5.07 | 5.43 | 4.60 |
| TRIM17             | 5.07 | 5.27 | 4.69 |
| ACRBP              | 5.07 | 5.63 | 4.80 |
| ADAM1A             | 5.07 | 5.35 | 4.72 |
| CCNB2              | 5.07 | 5.58 | 4.69 |
| GABARAPL1          | 5.07 | 5.36 | 4.65 |
| PLEKHH3            | 5.07 | 5.33 | 4.89 |
| FZD10-AS1          | 5.07 | 5.64 | 4.73 |
| SECTM1             | 5.07 | 5.36 | 4.74 |
| BYSL               | 5.07 | 5.33 | 4.65 |
| OTTHUMG00000156136 | 5.07 | 5.83 | 4.31 |
| DLGAP5             | 5.07 | 6.06 | 4.58 |
| SLC25A45           | 5.07 | 5.28 | 4.79 |
| DENND5B            | 5.07 | 5.39 | 4.34 |
| ITGB1BP1           | 5.07 | 5.64 | 4.41 |
| YKT6               | 5.07 | 5.58 | 4.66 |
| LOC100653000       | 5.07 | 5.30 | 4.78 |
| PDIA2              | 5.07 | 5.72 | 4.64 |
| LRSAM1             | 5.07 | 5.36 | 4.85 |
| TUSC3              | 5.07 | 5.63 | 4.39 |
| SYT8               | 5.07 | 5.28 | 4.54 |
| GSG1L              | 5.07 | 5.22 | 4.92 |
| ITPRIP             | 5.07 | 5.44 | 4.46 |
| ZNF423             | 5.07 | 5.59 | 4.45 |
| C6orf1             | 5.07 | 5.34 | 4.67 |
| HPCA               | 5.07 | 5.59 | 4.57 |
| FLJ38668           | 5.07 | 5.48 | 4.12 |
| SPPL2B             | 5.07 | 5.49 | 4.76 |
| C11orf83           | 5.07 | 5.28 | 4.66 |
| HMGN1              | 5.07 | 5.43 | 4.33 |
| TTC28-AS1          | 5.07 | 5.28 | 4.87 |
| C17orf100          | 5.07 | 5.45 | 4.73 |
| LINC00640          | 5.07 | 5.38 | 4.66 |
| TSTA3              | 5.07 | 5.50 | 4.74 |
| DHFRL1             | 5.07 | 5.43 | 4.61 |
| HKR1               | 5.06 | 5.73 | 4.55 |
| KIAA1683           | 5.06 | 5.36 | 4.66 |
| HCAR3              | 5.06 | 5.76 | 4.47 |
| FLJ40448           | 5.06 | 5.82 | 4.18 |
| TRUB2              | 5.06 | 5.32 | 4.75 |
| CDK5RAP1           | 5.06 | 5.48 | 4.34 |
| LHX2               | 5.06 | 5.66 | 4.82 |
| LOC284379          | 5.06 | 5.61 | 4.63 |
| SMIM11             | 5.06 | 5.54 | 4.68 |
| C8orf58            | 5.06 | 5.34 | 4.69 |
| CALY               | 5.06 | 5.46 | 4.61 |
| ARID3B             | 5.06 | 5.40 | 4.74 |
| OTTHUMG00000156131 | 5.06 | 5.96 | 4.55 |
| CALM1              | 5.06 | 5.33 | 4.53 |

|                    |      |      |      |
|--------------------|------|------|------|
| C20orf112          | 5.06 | 5.33 | 4.91 |
| NECAB3             | 5.06 | 5.45 | 4.70 |
| CCDC97             | 5.06 | 5.33 | 4.32 |
| OR3A4P             | 5.06 | 5.50 | 4.73 |
| NHSL2              | 5.06 | 5.55 | 4.43 |
| SLC30A4            | 5.06 | 5.61 | 4.46 |
| AGTR1              | 5.06 | 5.56 | 4.41 |
| UBE2D4             | 5.06 | 5.56 | 4.43 |
| FAM110D            | 5.06 | 5.62 | 4.27 |
| ARSB               | 5.06 | 5.69 | 4.41 |
| DUSP27             | 5.06 | 5.44 | 4.71 |
| C4orf21            | 5.06 | 5.37 | 4.66 |
| FEM1A              | 5.06 | 5.27 | 4.80 |
| SRRT               | 5.06 | 5.50 | 4.48 |
| LOC100289090       | 5.06 | 5.58 | 4.54 |
| OTTHUMG00000162193 | 5.06 | 5.44 | 4.48 |
| RAP1A              | 5.06 | 5.61 | 4.64 |
| DOK3               | 5.06 | 5.23 | 4.80 |
| NEXN               | 5.06 | 5.98 | 4.43 |
| ELF4               | 5.06 | 5.49 | 4.67 |
| OTTHUMG00000168346 | 5.06 | 5.53 | 4.57 |
| PPP1R32            | 5.06 | 5.31 | 4.79 |
| OTTHUMG00000018322 | 5.06 | 5.49 | 4.57 |
| CLEC16A            | 5.06 | 5.41 | 4.69 |
| NAB2               | 5.06 | 5.76 | 4.50 |
| FASN               | 5.06 | 5.30 | 4.91 |
| FEN1               | 5.06 | 5.33 | 4.68 |
| LINC00884          | 5.06 | 5.62 | 4.59 |
| BAX                | 5.06 | 5.58 | 4.39 |
| SLC6A16            | 5.06 | 5.91 | 4.64 |
| PELI3              | 5.06 | 5.35 | 4.95 |
| OTP                | 5.06 | 5.37 | 4.76 |
| TRERF1             | 5.06 | 5.25 | 4.85 |
| LZTR1              | 5.06 | 5.32 | 4.60 |
| ACACB              | 5.06 | 5.44 | 4.61 |
| LOC100131320       | 5.06 | 5.63 | 4.32 |
| LOC729041          | 5.06 | 5.34 | 4.51 |
| KLHL21             | 5.06 | 5.28 | 4.80 |
| RHBDL1             | 5.06 | 5.49 | 4.61 |
| POLR2F             | 5.06 | 5.34 | 4.85 |
| RNMT               | 5.06 | 5.58 | 4.54 |
| ZNF662             | 5.06 | 5.27 | 4.73 |
| CHKA               | 5.06 | 5.50 | 4.43 |
| TADA2B             | 5.06 | 5.35 | 4.69 |
| OTTHUMG00000169402 | 5.06 | 5.51 | 4.60 |
| GTF2H2C            | 5.06 | 5.43 | 4.39 |
| ZNF271             | 5.06 | 5.75 | 4.04 |
| DPP9               | 5.06 | 5.40 | 4.61 |
| OTTHUMG00000180449 | 5.06 | 5.59 | 4.78 |

|                    |      |      |      |
|--------------------|------|------|------|
| TLR3               | 5.06 | 5.69 | 4.48 |
| S100A14            | 5.06 | 5.62 | 4.78 |
| ZNF696             | 5.06 | 5.43 | 4.87 |
| C17orf59           | 5.06 | 5.37 | 4.69 |
| C21orf67           | 5.06 | 5.36 | 4.63 |
| SNHG15             | 5.06 | 5.49 | 4.69 |
| ASAP1-IT1          | 5.06 | 5.34 | 4.59 |
| SLC22A23           | 5.06 | 5.32 | 4.51 |
| SMIM17             | 5.06 | 5.57 | 4.51 |
| RNASEH2A           | 5.06 | 5.70 | 4.60 |
| OTTHUMG00000163077 | 5.06 | 5.36 | 4.80 |
| TTY14              | 5.06 | 5.88 | 3.87 |
| EPHX2              | 5.06 | 5.45 | 4.50 |
| ERO1LB             | 5.06 | 5.76 | 4.16 |
| RDH8               | 5.06 | 5.33 | 4.78 |
| MYBL2              | 5.06 | 5.42 | 4.74 |
| RNF223             | 5.06 | 5.26 | 4.66 |
| TDRKH              | 5.06 | 5.37 | 4.63 |
| SLC52A2            | 5.06 | 5.79 | 4.56 |
| IGSF8              | 5.06 | 5.36 | 4.68 |
| PPP2R2A            | 5.06 | 5.29 | 4.72 |
| HNF1A              | 5.06 | 5.47 | 4.67 |
| INTS8              | 5.06 | 5.33 | 4.45 |
| EDA2R              | 5.06 | 5.60 | 4.71 |
| KCTD17             | 5.06 | 5.45 | 4.78 |
| LOC100131347       | 5.06 | 5.87 | 4.47 |
| C1QTNF9B-AS1       | 5.06 | 5.32 | 4.64 |
| SRCIN1             | 5.06 | 5.32 | 4.76 |
| LOC100506115       | 5.06 | 5.48 | 4.62 |
| APCDD1             | 5.06 | 5.63 | 4.53 |
| PRSS3              | 5.06 | 5.61 | 4.50 |
| RAB6B              | 5.06 | 5.64 | 4.75 |
| DMAP1              | 5.06 | 5.49 | 4.47 |
| FAM189A2           | 5.06 | 5.36 | 4.78 |
| PTPN3              | 5.05 | 5.46 | 4.47 |
| STARD3NL           | 5.05 | 5.47 | 4.68 |
| RNF138             | 5.05 | 5.55 | 4.34 |
| CHM                | 5.05 | 5.63 | 4.39 |
| CPM                | 5.05 | 6.17 | 3.97 |
| LOC442075          | 5.05 | 5.43 | 4.49 |
| VMO1               | 5.05 | 5.97 | 4.75 |
| SLC6A12            | 5.05 | 5.58 | 4.73 |
| RAMP2-AS1          | 5.05 | 5.51 | 4.60 |
| LRFN3              | 5.05 | 5.67 | 4.58 |
| LSM1               | 5.05 | 5.85 | 4.33 |
| HOXC-AS2           | 5.05 | 5.26 | 4.65 |
| LOC284757          | 5.05 | 5.74 | 4.56 |
| UBE2T              | 5.05 | 5.91 | 4.36 |
| SHANK2-AS3         | 5.05 | 5.50 | 4.52 |

|                    |      |      |      |
|--------------------|------|------|------|
| ABLIM3             | 5.05 | 5.31 | 4.61 |
| EMX1               | 5.05 | 5.27 | 4.71 |
| ACTA1              | 5.05 | 5.63 | 4.41 |
| CEP128             | 5.05 | 5.45 | 4.57 |
| BTG1               | 5.05 | 5.68 | 4.65 |
| DHX30              | 5.05 | 5.33 | 4.87 |
| ZBTB3              | 5.05 | 5.66 | 4.32 |
| OTTHUMG00000172617 | 5.05 | 5.59 | 4.11 |
| CNNM4              | 5.05 | 5.43 | 4.71 |
| C1orf145           | 5.05 | 5.69 | 4.76 |
| TMEM52             | 5.05 | 5.53 | 4.79 |
| PTPLA              | 5.05 | 5.36 | 4.77 |
| SLC4A4             | 5.05 | 5.66 | 4.41 |
| OTTHUMG00000179955 | 5.05 | 5.61 | 4.23 |
| SPRR1A             | 5.05 | 5.95 | 4.70 |
| GOLGA6L6           | 5.05 | 5.67 | 4.37 |
| PIF1               | 5.05 | 5.47 | 4.82 |
| ZNRF3-IT1          | 5.05 | 5.65 | 4.43 |
| DPH5               | 5.05 | 5.66 | 4.63 |
| LOC285547          | 5.05 | 5.32 | 4.69 |
| NOSTRIN            | 5.05 | 5.71 | 4.25 |
| INPP1              | 5.05 | 5.44 | 4.71 |
| SNORA36B           | 5.05 | 5.84 | 4.61 |
| LOC100133669       | 5.05 | 5.71 | 4.47 |
| ZSCAN18            | 5.05 | 5.25 | 4.71 |
| FAM228B            | 5.05 | 5.46 | 4.46 |
| FAM90A27P          | 5.05 | 5.57 | 4.15 |
| MID1IP1            | 5.05 | 5.29 | 4.58 |
| LINC00484          | 5.05 | 5.45 | 4.41 |
| OR52E2             | 5.05 | 5.67 | 4.66 |
| RNA5SP326          | 5.05 | 5.51 | 4.46 |
| ZNF610             | 5.05 | 5.50 | 4.63 |
| MFSD3              | 5.05 | 5.50 | 4.50 |
| KCNJ13             | 5.05 | 5.33 | 4.69 |
| ADAL               | 5.05 | 5.68 | 4.46 |
| DEPDC5             | 5.05 | 5.22 | 4.80 |
| TMEM63C            | 5.05 | 5.42 | 4.75 |
| KDM1B              | 5.05 | 5.44 | 4.84 |
| SRRD               | 5.05 | 5.52 | 4.46 |
| ESRRB              | 5.05 | 5.28 | 4.86 |
| FAM110B            | 5.05 | 5.31 | 4.74 |
| LMO2               | 5.05 | 5.25 | 4.68 |
| LOH12CR1           | 5.05 | 5.44 | 4.76 |
| C11orf74           | 5.05 | 5.54 | 4.48 |
| LINC00434          | 5.05 | 5.68 | 4.55 |
| KRT83              | 5.05 | 5.28 | 4.40 |
| ANO8               | 5.05 | 5.46 | 4.66 |
| OTTHUMG00000173283 | 5.05 | 5.38 | 4.72 |
| PLAT               | 5.05 | 5.69 | 4.56 |

|                           |      |      |      |
|---------------------------|------|------|------|
| <i>TMEM37</i>             | 5.05 | 5.36 | 4.58 |
| <i>FAM92B</i>             | 5.05 | 5.68 | 4.45 |
| <i>FOXB2</i>              | 5.05 | 5.76 | 4.53 |
| <i>TP53I11</i>            | 5.05 | 5.41 | 4.83 |
| <i>FOLR4</i>              | 5.05 | 5.73 | 4.43 |
| <i>MPL</i>                | 5.05 | 5.33 | 4.66 |
| <i>GMPR</i>               | 5.05 | 5.50 | 4.70 |
| <i>PTK7</i>               | 5.05 | 5.27 | 4.68 |
| <i>MIR877</i>             | 5.05 | 5.51 | 4.48 |
| <i>POP5</i>               | 5.05 | 5.31 | 4.60 |
| <i>NFKB2</i>              | 5.05 | 5.30 | 4.91 |
| <i>FKRP</i>               | 5.05 | 5.31 | 4.70 |
| <i>IGLJ4</i>              | 5.05 | 6.00 | 4.14 |
| <i>PEG3</i>               | 5.05 | 5.51 | 4.61 |
| <i>GSTZ1</i>              | 5.05 | 5.33 | 4.75 |
| <i>MPRIP-AS1</i>          | 5.05 | 5.56 | 4.46 |
| <i>GJA9-MYCBP</i>         | 5.05 | 5.43 | 4.37 |
| <i>TPRG1-AS1</i>          | 5.05 | 5.46 | 4.66 |
| <i>ZNF175</i>             | 5.05 | 5.36 | 4.61 |
| <i>EDEM1</i>              | 5.05 | 5.61 | 4.48 |
| <i>FPGT-TNNI3K</i>        | 5.05 | 5.28 | 4.84 |
| <i>ARL6IP6</i>            | 5.05 | 5.36 | 4.59 |
| <i>BTBD9</i>              | 5.05 | 5.43 | 4.76 |
| <i>CEP76</i>              | 5.04 | 5.54 | 4.60 |
| <i>SIGLEC11</i>           | 5.04 | 5.49 | 4.24 |
| <i>HOXA7</i>              | 5.04 | 5.23 | 4.74 |
| <i>SH3PXD2A</i>           | 5.04 | 5.26 | 4.85 |
| <i>LOC100506060</i>       | 5.04 | 5.46 | 4.71 |
| <i>RPS7</i>               | 5.04 | 5.26 | 4.88 |
| <i>RNU7-52P</i>           | 5.04 | 5.51 | 4.55 |
| <i>SLC27A5</i>            | 5.04 | 5.24 | 4.91 |
| <i>OTTHUMG00000168151</i> | 5.04 | 5.41 | 4.82 |
| <i>PLEKHG5</i>            | 5.04 | 5.34 | 4.77 |
| <i>KCNN3</i>              | 5.04 | 5.41 | 4.62 |
| <i>RRAGC</i>              | 5.04 | 5.83 | 4.41 |
| <i>MIR218-1</i>           | 5.04 | 5.83 | 4.35 |
| <i>FGR</i>                | 5.04 | 5.41 | 4.68 |
| <i>PDZRN3</i>             | 5.04 | 5.31 | 4.77 |
| <i>SFXN2</i>              | 5.04 | 5.51 | 4.52 |
| <i>CAMK2N2</i>            | 5.04 | 5.38 | 4.61 |
| <i>AP3S1</i>              | 5.04 | 5.40 | 4.54 |
| <i>RCE1</i>               | 5.04 | 5.29 | 4.55 |
| <i>LOC100133746</i>       | 5.04 | 5.67 | 4.51 |
| <i>STRIP1</i>             | 5.04 | 5.30 | 4.75 |
| <i>TTC8</i>               | 5.04 | 5.52 | 4.32 |
| <i>SLA</i>                | 5.04 | 5.39 | 4.76 |
| <i>RGL3</i>               | 5.04 | 5.35 | 4.51 |
| <i>ZBTB7B</i>             | 5.04 | 5.20 | 4.76 |
| <i>PKDCC</i>              | 5.04 | 5.23 | 4.76 |



|                    |      |      |      |
|--------------------|------|------|------|
| C4orf6             | 5.04 | 5.65 | 4.70 |
| STL                | 5.04 | 5.58 | 4.35 |
| TEX22              | 5.04 | 5.47 | 4.87 |
| MKRN9P             | 5.04 | 5.94 | 4.59 |
| HOMER1             | 5.04 | 5.90 | 4.23 |
| MTUS2-AS1          | 5.04 | 5.50 | 4.45 |
| BCR                | 5.04 | 5.36 | 4.49 |
| UNKL               | 5.04 | 5.40 | 4.66 |
| APBB3              | 5.04 | 5.39 | 4.79 |
| LOC650368          | 5.04 | 5.44 | 4.72 |
| PAQR7              | 5.04 | 5.36 | 4.79 |
| MKI67              | 5.04 | 5.59 | 4.57 |
| OTTHUMG00000165339 | 5.04 | 5.38 | 4.73 |
| RPIA               | 5.04 | 5.29 | 4.70 |
| SUPT3H             | 5.04 | 5.49 | 4.59 |
| THOC3              | 5.04 | 5.60 | 4.68 |
| HMGB3              | 5.04 | 5.32 | 4.84 |
| IMPA1              | 5.04 | 5.51 | 4.53 |
| CENPF              | 5.04 | 5.92 | 4.21 |
| NADSYN1            | 5.04 | 5.34 | 4.38 |
| GRAMD4             | 5.04 | 5.47 | 4.49 |
| LOC100130698       | 5.04 | 5.29 | 4.84 |
| HINFP              | 5.04 | 5.40 | 4.73 |
| APOBEC2            | 5.04 | 5.44 | 4.70 |
| BAHD1              | 5.04 | 5.44 | 4.25 |
| MAGOH2             | 5.04 | 5.28 | 4.76 |
| SLC41A3            | 5.04 | 5.41 | 4.75 |
| JARID2             | 5.04 | 5.39 | 4.47 |
| SOLH               | 5.04 | 5.26 | 4.79 |
| IDUA               | 5.04 | 5.36 | 4.42 |
| NEK7               | 5.04 | 5.57 | 4.44 |
| ACTL8              | 5.04 | 5.60 | 4.78 |
| GNG3               | 5.04 | 5.56 | 4.70 |
| SPTY2D1            | 5.04 | 5.28 | 4.60 |
| ZNF516             | 5.04 | 5.40 | 4.85 |
| ZNF584             | 5.04 | 5.41 | 4.80 |
| S1PR1              | 5.04 | 5.58 | 4.30 |
| OTTHUMG00000032375 | 5.04 | 5.70 | 4.64 |
| TEX33              | 5.04 | 5.62 | 4.62 |
| IER5L              | 5.04 | 5.47 | 4.76 |
| PRKCE              | 5.04 | 5.30 | 4.84 |
| PRRT1              | 5.04 | 5.25 | 4.85 |
| MGLL               | 5.04 | 5.35 | 4.46 |
| DLG4               | 5.04 | 5.38 | 4.55 |
| ZNF829             | 5.04 | 5.57 | 4.75 |
| WNT10B             | 5.04 | 5.35 | 4.69 |
| SLED1              | 5.04 | 6.17 | 3.93 |
| LOC96610           | 5.04 | 5.69 | 3.83 |
| RAPGEF3            | 5.04 | 5.43 | 4.65 |

|                    |      |      |      |
|--------------------|------|------|------|
| GLIPR1L2           | 5.04 | 5.70 | 4.63 |
| PRR25              | 5.04 | 5.63 | 4.60 |
| FOLR1              | 5.04 | 5.50 | 4.45 |
| RNU1-14P           | 5.04 | 5.83 | 4.11 |
| C18orf25           | 5.04 | 5.40 | 4.54 |
| KAT8               | 5.04 | 5.18 | 4.85 |
| LYSMD3             | 5.04 | 5.75 | 4.47 |
| ZBTB43             | 5.04 | 5.52 | 4.69 |
| SEC14L6            | 5.04 | 5.56 | 4.43 |
| INSRR              | 5.04 | 5.59 | 4.69 |
| TLL1               | 5.04 | 5.48 | 4.46 |
| CEP44              | 5.04 | 5.69 | 4.59 |
| LOC100507330       | 5.04 | 5.69 | 4.51 |
| CCT6P1             | 5.04 | 5.44 | 4.79 |
| INPP5D             | 5.04 | 5.41 | 4.57 |
| GPR56              | 5.04 | 5.65 | 4.14 |
| OTTHUMG00000151833 | 5.04 | 5.44 | 4.35 |
| ORAI3              | 5.04 | 5.21 | 4.65 |
| HSP90AB4P          | 5.04 | 5.45 | 4.52 |
| POLN               | 5.04 | 5.40 | 4.74 |
| LINS               | 5.04 | 5.58 | 4.64 |
| SIGLEC7            | 5.04 | 5.67 | 4.29 |
| LOC100288144       | 5.03 | 5.62 | 4.40 |
| OTTHUMG00000159297 | 5.03 | 5.54 | 4.49 |
| RMI1               | 5.03 | 5.45 | 4.69 |
| FCRL6              | 5.03 | 5.51 | 4.68 |
| OTTHUMG00000015822 | 5.03 | 5.87 | 4.43 |
| FZD10              | 5.03 | 5.33 | 4.32 |
| BCDIN3D            | 5.03 | 5.26 | 4.67 |
| C4orf3             | 5.03 | 5.29 | 4.64 |
| LMBRD2             | 5.03 | 5.51 | 4.36 |
| DPYS               | 5.03 | 5.35 | 4.46 |
| VWA2               | 5.03 | 5.20 | 4.90 |
| IL1RAP             | 5.03 | 5.36 | 4.76 |
| HES4               | 5.03 | 5.65 | 4.56 |
| C1orf174           | 5.03 | 5.43 | 4.54 |
| DDX11-AS1          | 5.03 | 5.39 | 4.61 |
| MICALL2            | 5.03 | 5.34 | 4.69 |
| GALP               | 5.03 | 5.42 | 4.63 |
| TIMM17B            | 5.03 | 5.28 | 4.58 |
| KIAA0247           | 5.03 | 5.40 | 4.31 |
| MUC5AC             | 5.03 | 5.26 | 4.80 |
| EGFLAM-AS1         | 5.03 | 5.75 | 4.34 |
| EIF5A              | 5.03 | 5.37 | 4.75 |
| FFAR4              | 5.03 | 5.75 | 4.28 |
| TFB1M              | 5.03 | 5.71 | 4.66 |
| LOC100508781       | 5.03 | 6.06 | 3.85 |
| LOC729305          | 5.03 | 5.39 | 4.62 |
| C11orf95           | 5.03 | 5.51 | 4.78 |

|                    |      |      |      |
|--------------------|------|------|------|
| ZFP14              | 5.03 | 5.58 | 4.46 |
| GNAL               | 5.03 | 5.59 | 4.67 |
| NOV                | 5.03 | 6.02 | 4.09 |
| RNU5E-9P           | 5.03 | 5.58 | 3.81 |
| OTTHUMG00000163757 | 5.03 | 5.52 | 4.43 |
| PPP4R1L            | 5.03 | 5.37 | 4.53 |
| BRIX1              | 5.03 | 5.44 | 4.35 |
| LOC390660          | 5.03 | 5.60 | 4.44 |
| LOC100505683       | 5.03 | 5.34 | 4.68 |
| PRCP               | 5.03 | 5.36 | 4.67 |
| CHUK               | 5.03 | 5.71 | 4.45 |
| KIAA1737           | 5.03 | 5.30 | 4.75 |
| KLK3               | 5.03 | 5.71 | 4.65 |
| FOXE1              | 5.03 | 5.47 | 4.64 |
| MAGEB16            | 5.03 | 5.82 | 4.52 |
| POLR2K             | 5.03 | 5.47 | 4.46 |
| OR10D3             | 5.03 | 5.51 | 4.45 |
| GSDMA              | 5.03 | 5.37 | 4.73 |
| MCHR1              | 5.03 | 5.37 | 4.87 |
| APOBEC3C           | 5.03 | 5.76 | 4.33 |
| PHACTR1            | 5.03 | 5.40 | 4.52 |
| MIR660             | 5.03 | 5.49 | 4.52 |
| OTTHUMG00000163302 | 5.03 | 5.93 | 4.43 |
| CIAPIN1            | 5.03 | 5.46 | 4.78 |
| UBE2Q2P1           | 5.03 | 5.61 | 3.99 |
| CLCN4              | 5.03 | 5.23 | 4.81 |
| CEP170P1           | 5.03 | 5.63 | 3.83 |
| GYG2               | 5.03 | 5.57 | 4.34 |
| AVPR1B             | 5.03 | 5.71 | 4.62 |
| SLC47A1            | 5.03 | 5.33 | 4.64 |
| SFXN4              | 5.03 | 5.32 | 4.66 |
| LOC728145          | 5.03 | 5.41 | 4.80 |
| FAM43B             | 5.03 | 5.47 | 4.60 |
| CCDC64B            | 5.03 | 5.15 | 4.82 |
| DENND3             | 5.03 | 5.21 | 4.70 |
| LOC100507460       | 5.03 | 5.96 | 4.63 |
| STH                | 5.03 | 5.38 | 4.76 |
| MGAT3              | 5.03 | 5.61 | 4.79 |
| SH3BP1             | 5.03 | 5.34 | 4.60 |
| OR1A2              | 5.03 | 5.80 | 4.31 |
| RILP               | 5.03 | 5.44 | 4.45 |
| SPIRE2             | 5.03 | 5.72 | 4.38 |
| ERI2               | 5.03 | 5.29 | 4.82 |
| ZNF717             | 5.03 | 5.72 | 4.74 |
| TONSL              | 5.03 | 5.46 | 4.59 |
| LAIR1              | 5.03 | 5.37 | 4.41 |
| LOC283731          | 5.03 | 5.39 | 4.71 |
| NAPB               | 5.03 | 5.58 | 4.70 |
| SULT1A1            | 5.03 | 5.61 | 4.51 |

|                    |      |      |      |
|--------------------|------|------|------|
| RGR                | 5.03 | 5.64 | 4.56 |
| OTTHUMG00000170191 | 5.03 | 5.52 | 4.44 |
| TRPT1              | 5.03 | 5.25 | 4.68 |
| ZNF343             | 5.03 | 5.55 | 4.45 |
| IL6R               | 5.03 | 5.61 | 4.19 |
| FLJ13224           | 5.03 | 5.23 | 4.79 |
| DBNDD1             | 5.03 | 5.48 | 4.66 |
| MIR4482-1          | 5.02 | 5.35 | 4.56 |
| OXSM               | 5.02 | 5.21 | 4.80 |
| OR7E12P            | 5.02 | 5.89 | 4.43 |
| LOC100129940       | 5.02 | 5.53 | 4.33 |
| SFXN5              | 5.02 | 5.43 | 4.66 |
| TMEM242            | 5.02 | 5.61 | 4.39 |
| SLC35E3            | 5.02 | 5.48 | 4.55 |
| TPI1               | 5.02 | 5.34 | 4.75 |
| ABCC11             | 5.02 | 5.39 | 4.68 |
| KRTAP16-1          | 5.02 | 5.24 | 4.82 |
| PPIL6              | 5.02 | 5.29 | 4.67 |
| ABCC9              | 5.02 | 6.38 | 3.83 |
| FLJ34521           | 5.02 | 5.25 | 4.79 |
| GOT2               | 5.02 | 5.49 | 4.70 |
| C11orf1            | 5.02 | 5.55 | 4.44 |
| TBC1D25            | 5.02 | 5.54 | 4.66 |
| ARHGAP44           | 5.02 | 5.59 | 4.42 |
| CCL4L1             | 5.02 | 5.37 | 4.57 |
| OCLM               | 5.02 | 5.53 | 4.32 |
| MSL3               | 5.02 | 5.53 | 4.50 |
| DNAH1              | 5.02 | 5.41 | 4.44 |
| CSAG1              | 5.02 | 5.84 | 4.15 |
| SCARNA4            | 5.02 | 5.39 | 4.66 |
| TEX38              | 5.02 | 5.37 | 4.61 |
| C12orf52           | 5.02 | 5.21 | 4.77 |
| VIPR1              | 5.02 | 5.47 | 4.59 |
| OR10Z1             | 5.02 | 5.78 | 4.61 |
| IRS1               | 5.02 | 5.31 | 4.65 |
| ZNF768             | 5.02 | 5.39 | 4.69 |
| GLIPR1L1           | 5.02 | 5.33 | 4.72 |
| ZNF398             | 5.02 | 5.48 | 4.70 |
| TFB2M              | 5.02 | 5.43 | 4.69 |
| CHRND              | 5.02 | 5.37 | 4.24 |
| ARHGEF28           | 5.02 | 5.41 | 4.34 |
| CELF3              | 5.02 | 5.47 | 4.78 |
| TREML1             | 5.02 | 5.57 | 4.58 |
| FLJ12825           | 5.02 | 5.47 | 4.60 |
| FXR2               | 5.02 | 5.31 | 4.82 |
| OTTHUMG00000170611 | 5.02 | 5.44 | 4.53 |
| ZBTB26             | 5.02 | 5.34 | 4.78 |
| ALDH1A3            | 5.02 | 5.41 | 4.83 |
| N6AMT2             | 5.02 | 5.52 | 4.48 |

|                    |      |      |      |
|--------------------|------|------|------|
| NAALADL1           | 5.02 | 5.28 | 4.83 |
| OR51V1             | 5.02 | 5.68 | 4.58 |
| OTTHUMG00000167126 | 5.02 | 5.64 | 4.52 |
| TLE3               | 5.02 | 5.33 | 4.73 |
| ADCY6              | 5.02 | 5.26 | 4.55 |
| GRPEL2             | 5.02 | 5.42 | 4.55 |
| ANKRD42            | 5.02 | 5.41 | 4.72 |
| SNORA47            | 5.02 | 5.47 | 4.63 |
| OTTHUMG00000058148 | 5.02 | 5.66 | 4.39 |
| OTTHUMG00000058669 | 5.02 | 5.66 | 4.39 |
| LOC100505555       | 5.02 | 5.44 | 4.74 |
| UBXN10             | 5.02 | 5.37 | 4.60 |
| CECR7              | 5.02 | 5.32 | 4.76 |
| SPHK1              | 5.02 | 5.38 | 4.72 |
| SH3BGR             | 5.02 | 5.25 | 4.59 |
| PALD1              | 5.02 | 5.40 | 4.71 |
| OTTHUMG00000155064 | 5.02 | 5.53 | 4.37 |
| FLJ32756           | 5.02 | 5.63 | 4.36 |
| DENND2C            | 5.02 | 5.46 | 4.59 |
| METTL21A           | 5.02 | 5.33 | 4.63 |
| PHF15              | 5.02 | 5.31 | 4.73 |
| OTTHUMG00000153152 | 5.02 | 5.89 | 4.36 |
| OR1L1              | 5.02 | 5.64 | 4.50 |
| GS52               | 5.02 | 5.49 | 4.31 |
| DNAJB1             | 5.02 | 6.00 | 4.28 |
| RHBDL2             | 5.02 | 5.49 | 4.36 |
| C3                 | 5.02 | 5.38 | 4.49 |
| ENTPD8             | 5.02 | 5.36 | 4.48 |
| PAMR1              | 5.02 | 5.62 | 4.49 |
| GGT3P              | 5.02 | 5.75 | 4.54 |
| AGFG2              | 5.02 | 5.58 | 4.65 |
| LYRM7              | 5.02 | 5.72 | 4.34 |
| PGAP2              | 5.02 | 5.33 | 4.51 |
| IMMP2L             | 5.02 | 5.38 | 4.80 |
| ACAP1              | 5.02 | 5.64 | 4.54 |
| C19orf33           | 5.02 | 5.57 | 4.58 |
| OTTHUMG00000086780 | 5.02 | 5.26 | 4.76 |
| TMEM41B            | 5.02 | 5.74 | 4.09 |
| BCAP29             | 5.02 | 5.49 | 4.37 |
| GAMT               | 5.02 | 5.41 | 4.66 |
| OTTHUMG00000163611 | 5.02 | 5.37 | 4.65 |
| CDADC1             | 5.02 | 5.43 | 4.21 |
| ZNRF2P1            | 5.02 | 5.73 | 4.37 |
| PRCC               | 5.01 | 5.27 | 4.58 |
| SPANXA2            | 5.01 | 5.36 | 4.64 |
| SEC14L1P1          | 5.01 | 5.41 | 4.72 |
| SNORD114-11        | 5.01 | 6.76 | 3.15 |
| KIAA1551           | 5.01 | 5.24 | 4.70 |
| DPEP2              | 5.01 | 5.52 | 4.66 |

|                    |      |      |      |
|--------------------|------|------|------|
| RBM19              | 5.01 | 5.33 | 4.59 |
| OTTHUMG00000041597 | 5.01 | 5.65 | 4.44 |
| SH3RF3             | 5.01 | 5.32 | 4.60 |
| RNF113A            | 5.01 | 5.36 | 4.46 |
| OTTHUMG00000170113 | 5.01 | 5.59 | 4.53 |
| QTRT1              | 5.01 | 5.39 | 4.44 |
| CETN3              | 5.01 | 5.29 | 4.55 |
| LOC100996347       | 5.01 | 5.74 | 4.32 |
| HIST3H2BB          | 5.01 | 5.64 | 4.36 |
| ANKRD20A9P         | 5.01 | 5.56 | 4.51 |
| DCPS               | 5.01 | 5.30 | 4.57 |
| CCL26              | 5.01 | 5.35 | 4.65 |
| ACOT7              | 5.01 | 5.28 | 4.72 |
| PSMD5-AS1          | 5.01 | 5.61 | 4.48 |
| ERAL1              | 5.01 | 5.31 | 4.73 |
| TBCCD1             | 5.01 | 5.63 | 4.23 |
| FBLL1              | 5.01 | 5.44 | 4.51 |
| PANX3              | 5.01 | 5.59 | 4.58 |
| RHBG               | 5.01 | 5.37 | 4.54 |
| SULT1C4            | 5.01 | 5.68 | 3.74 |
| CRIP3              | 5.01 | 5.41 | 4.73 |
| SSNA1              | 5.01 | 5.85 | 4.55 |
| CELA3B             | 5.01 | 5.72 | 4.48 |
| LOC100131691       | 5.01 | 5.38 | 4.62 |
| TMEM185B           | 5.01 | 5.60 | 4.43 |
| OTTHUMG00000169889 | 5.01 | 5.58 | 4.58 |
| GFM1               | 5.01 | 5.61 | 4.52 |
| ZNF570             | 5.01 | 5.34 | 4.73 |
| TXNRD3             | 5.01 | 5.42 | 4.47 |
| TRAJ5              | 5.01 | 5.84 | 4.26 |
| PRKAR1B            | 5.01 | 5.42 | 4.70 |
| KRTAP5-AS1         | 5.01 | 5.29 | 4.80 |
| OTTHUMG00000165804 | 5.01 | 5.57 | 4.46 |
| ZBTB47             | 5.01 | 5.25 | 4.77 |
| RABL2B             | 5.01 | 5.31 | 4.71 |
| FGFRL1             | 5.01 | 5.67 | 4.65 |
| DSN1               | 5.01 | 5.45 | 4.41 |
| RASIP1             | 5.01 | 5.68 | 4.65 |
| MYC                | 5.01 | 5.35 | 4.75 |
| CLDN5              | 5.01 | 5.28 | 4.57 |
| SGK223             | 5.01 | 5.27 | 4.67 |
| CCDC146            | 5.01 | 5.45 | 4.63 |
| CD180              | 5.01 | 6.49 | 4.41 |
| MIR575             | 5.01 | 5.72 | 4.63 |
| TTC16              | 5.01 | 5.32 | 4.57 |
| AKIP1              | 5.01 | 5.31 | 4.59 |
| FUT4               | 5.01 | 5.47 | 4.49 |
| CCDC66             | 5.01 | 5.40 | 4.56 |
| GTF2A2             | 5.01 | 5.44 | 4.52 |

|                    |      |      |      |
|--------------------|------|------|------|
| AGK                | 5.01 | 5.34 | 4.74 |
| LY9                | 5.01 | 5.34 | 4.62 |
| TFE3               | 5.01 | 5.39 | 4.63 |
| POTEM              | 5.01 | 6.08 | 4.61 |
| ATAD3B             | 5.01 | 5.33 | 4.52 |
| C12orf43           | 5.01 | 5.27 | 4.82 |
| ZFHX2              | 5.01 | 5.35 | 4.56 |
| RWDD2B             | 5.01 | 5.34 | 4.44 |
| OR10J3             | 5.01 | 5.83 | 4.55 |
| FFAR3              | 5.01 | 5.44 | 4.62 |
| IL17REL            | 5.01 | 5.22 | 4.67 |
| MIR583             | 5.01 | 5.83 | 4.17 |
| C9orf64            | 5.01 | 5.56 | 4.31 |
| ZNF404             | 5.01 | 5.68 | 4.39 |
| MIR4298            | 5.01 | 5.52 | 4.41 |
| INMT-FAM188B       | 5.01 | 5.27 | 4.84 |
| SETD1A             | 5.01 | 5.40 | 4.69 |
| ITIH4              | 5.01 | 5.43 | 4.84 |
| ADAMTS9            | 5.01 | 6.08 | 4.30 |
| LOC149086          | 5.01 | 5.46 | 4.60 |
| CD1C               | 5.01 | 5.65 | 4.56 |
| C9orf41            | 5.01 | 5.60 | 4.67 |
| OTTHUMG00000013261 | 5.01 | 5.68 | 4.40 |
| NARS2              | 5.01 | 5.36 | 4.63 |
| MIR4529            | 5.01 | 6.21 | 4.52 |
| PCDHB18            | 5.01 | 5.43 | 4.69 |
| OR1N1              | 5.01 | 5.72 | 4.39 |
| FRG2C              | 5.01 | 5.56 | 4.51 |
| GSTA1              | 5.00 | 5.52 | 4.42 |
| SPIN2A             | 5.00 | 5.60 | 4.53 |
| FBXO3              | 5.00 | 5.49 | 4.39 |
| OSGIN2             | 5.00 | 5.44 | 4.70 |
| THAP2              | 5.00 | 5.34 | 4.53 |
| IPW                | 5.00 | 5.42 | 4.56 |
| TIPIN              | 5.00 | 5.39 | 4.52 |
| DSE                | 5.00 | 5.25 | 4.58 |
| OTTHUMG00000179435 | 5.00 | 5.34 | 4.53 |
| LOC647859          | 5.00 | 6.06 | 3.25 |
| PRKAG2             | 5.00 | 5.47 | 4.65 |
| ZFP1               | 5.00 | 5.52 | 4.46 |
| CLDN14             | 5.00 | 5.24 | 4.76 |
| E2F4               | 5.00 | 5.43 | 4.39 |
| METTL4             | 5.00 | 5.39 | 4.55 |
| LNX1               | 5.00 | 5.86 | 4.62 |
| PRTFDC1            | 5.00 | 5.70 | 4.36 |
| TNIK               | 5.00 | 5.66 | 4.45 |
| RPL22L1            | 5.00 | 5.38 | 4.62 |
| ST8SIA5            | 5.00 | 5.34 | 4.67 |
| PEX2               | 5.00 | 5.28 | 4.64 |

|                    |      |      |      |
|--------------------|------|------|------|
| LOC285043          | 5.00 | 5.46 | 4.75 |
| TWIST2             | 5.00 | 5.28 | 4.29 |
| CENPM              | 5.00 | 5.49 | 4.71 |
| TMEM135            | 5.00 | 5.40 | 4.52 |
| OTTHUMG00000171137 | 5.00 | 5.86 | 4.38 |
| ZFYVE19            | 5.00 | 5.29 | 4.69 |
| INPP5E             | 5.00 | 5.28 | 4.71 |
| OTTHUMG00000151887 | 5.00 | 5.40 | 4.77 |
| PPM1D              | 5.00 | 5.13 | 4.75 |
| OTTHUMG00000156122 | 5.00 | 5.48 | 4.45 |
| CTBP2              | 5.00 | 5.25 | 4.45 |
| ZNF701             | 5.00 | 5.70 | 4.29 |
| MIR3182            | 5.00 | 5.34 | 4.60 |
| HPGDS              | 5.00 | 6.56 | 4.06 |
| KCNMB2             | 5.00 | 5.42 | 4.61 |
| SIGLEC9            | 5.00 | 6.09 | 4.52 |
| PLCB2              | 5.00 | 5.58 | 4.21 |
| AADAT              | 5.00 | 5.21 | 4.88 |
| OTTHUMG00000160261 | 5.00 | 5.64 | 4.30 |
| CCDC51             | 5.00 | 5.26 | 4.59 |
| PTK2B              | 5.00 | 5.47 | 4.43 |
| GRAMD1A            | 5.00 | 5.29 | 4.46 |
| ZNF646             | 5.00 | 5.39 | 4.30 |
| TMPRSS9            | 5.00 | 5.27 | 4.74 |
| COA5               | 5.00 | 5.49 | 4.53 |
| KCNJ15             | 5.00 | 5.41 | 4.46 |
| RSRC1              | 5.00 | 5.29 | 4.54 |
| OTTHUMG00000177058 | 5.00 | 5.37 | 4.66 |
| FCHSD1             | 5.00 | 5.33 | 4.65 |
| ADRBK1             | 5.00 | 5.22 | 4.60 |
| ZNF200             | 5.00 | 5.13 | 4.86 |
| RNF212             | 5.00 | 5.30 | 4.59 |
| CXorf36            | 5.00 | 5.54 | 4.56 |
| PGAP1              | 5.00 | 5.53 | 4.19 |
| C4orf47            | 5.00 | 5.68 | 4.31 |
| MSMO1              | 5.00 | 5.39 | 4.10 |
| LOC648570          | 5.00 | 5.94 | 3.74 |
| OTTHUMG00000009742 | 5.00 | 5.60 | 4.35 |
| OTTHUMG00000170896 | 5.00 | 5.45 | 4.53 |
| SCN1B              | 5.00 | 5.37 | 4.31 |
| C1orf106           | 5.00 | 5.29 | 4.73 |
| MIR3175            | 5.00 | 5.37 | 4.47 |
| FXVD4              | 5.00 | 5.39 | 4.65 |
| YWHAH              | 5.00 | 5.52 | 4.23 |
| LOC100131094       | 5.00 | 5.36 | 4.52 |
| RNA5SP222          | 5.00 | 5.81 | 4.20 |
| CCDC42B            | 5.00 | 5.69 | 4.54 |
| P2RX2              | 5.00 | 5.60 | 4.53 |
| TMEM200B           | 5.00 | 5.45 | 4.36 |



|                    |      |      |      |
|--------------------|------|------|------|
| WNT2B              | 5.00 | 5.26 | 4.64 |
| LOC100131655       | 5.00 | 5.32 | 4.61 |
| LOC407835          | 5.00 | 5.26 | 4.80 |
| SULT4A1            | 5.00 | 5.57 | 4.72 |
| OTTHUMG00000153822 | 5.00 | 5.39 | 4.56 |
| FAM136A            | 5.00 | 5.57 | 4.65 |
| MYCBP2-AS2         | 5.00 | 5.27 | 4.73 |
| SMYD4              | 5.00 | 5.26 | 4.70 |
| HSPA1L             | 5.00 | 5.26 | 4.82 |
| LOC400685          | 5.00 | 5.56 | 4.50 |
| MAD2L1BP           | 5.00 | 5.56 | 4.63 |
| OTTHUMG00000020901 | 5.00 | 5.33 | 4.31 |
| NRDE2              | 5.00 | 5.25 | 4.38 |
| DMRT1              | 5.00 | 5.39 | 4.64 |
| KISS1R             | 5.00 | 5.32 | 4.86 |
| SHISA2             | 5.00 | 5.13 | 4.83 |
| LOC100509541       | 5.00 | 5.47 | 4.51 |
| LOC613206          | 5.00 | 5.58 | 4.57 |
| ASTN1              | 5.00 | 5.47 | 4.69 |
| CXorf24            | 5.00 | 5.35 | 4.59 |
| LETM1              | 5.00 | 5.28 | 4.64 |
| E2F3-IT1           | 5.00 | 5.32 | 4.62 |
| MRPL38             | 5.00 | 5.52 | 4.59 |
| RAB24              | 5.00 | 5.32 | 4.61 |
| ARGFX              | 5.00 | 6.05 | 4.58 |
| DOPEY2             | 5.00 | 5.29 | 4.58 |
| LOC100505636       | 5.00 | 5.37 | 4.69 |
| CCDC78             | 5.00 | 5.51 | 4.71 |
| PTGS2              | 5.00 | 6.73 | 4.06 |
| SERTAD3            | 5.00 | 5.32 | 4.71 |
| MIOX               | 5.00 | 5.44 | 4.66 |
| CACNA1G-AS1        | 5.00 | 5.39 | 4.58 |
| PRSS53             | 5.00 | 5.31 | 4.62 |
| OTTHUMG00000171380 | 4.99 | 5.79 | 4.36 |
| THAP6              | 4.99 | 5.28 | 4.76 |
| MIR30E             | 4.99 | 6.27 | 3.39 |
| NRXN2              | 4.99 | 5.52 | 4.58 |
| KRT75              | 4.99 | 5.53 | 4.40 |
| OTTHUMG00000035804 | 4.99 | 5.37 | 4.63 |
| PIM1               | 4.99 | 5.48 | 4.40 |
| MAP3K11            | 4.99 | 5.36 | 4.48 |
| CCNI2              | 4.99 | 5.36 | 4.45 |
| GPATCH4            | 4.99 | 5.32 | 4.62 |
| TMEM82             | 4.99 | 5.52 | 4.56 |
| SNORA23            | 4.99 | 5.60 | 4.38 |
| C17orf50           | 4.99 | 5.35 | 4.72 |
| DAPK3              | 4.99 | 5.71 | 4.32 |
| IVD                | 4.99 | 5.47 | 4.55 |
| MAGIX              | 4.99 | 5.25 | 4.66 |

|                    |      |      |      |
|--------------------|------|------|------|
| LOC100506295       | 4.99 | 5.36 | 4.51 |
| BMP7               | 4.99 | 5.16 | 4.52 |
| CARD14             | 4.99 | 5.29 | 4.64 |
| ANKUB1             | 4.99 | 5.49 | 4.54 |
| AKNA               | 4.99 | 5.41 | 4.71 |
| MIR329-1           | 4.99 | 5.89 | 4.37 |
| DIAPH3-AS1         | 4.99 | 5.30 | 4.23 |
| IPP                | 4.99 | 5.51 | 4.45 |
| MTX1               | 4.99 | 5.50 | 4.66 |
| RNF222             | 4.99 | 5.46 | 4.64 |
| LRRC17             | 4.99 | 6.80 | 3.76 |
| MIR3691            | 4.99 | 5.50 | 4.42 |
| TMEM235            | 4.99 | 5.42 | 4.70 |
| MIR365B            | 4.99 | 5.29 | 4.66 |
| ZNF35              | 4.99 | 5.38 | 4.29 |
| KIF12              | 4.99 | 5.26 | 4.74 |
| TRAV1-1            | 4.99 | 5.65 | 4.44 |
| C11orf63           | 4.99 | 5.33 | 4.69 |
| EPB41              | 4.99 | 5.23 | 4.77 |
| ENTPD2             | 4.99 | 5.16 | 4.77 |
| RNA5-8SP4          | 4.99 | 5.49 | 4.61 |
| KCNIP2             | 4.99 | 5.42 | 4.63 |
| LOC153684          | 4.99 | 5.27 | 4.42 |
| LINGO4             | 4.99 | 5.71 | 4.33 |
| LOC401180          | 4.99 | 5.38 | 4.51 |
| RNF39              | 4.99 | 5.45 | 4.62 |
| SNORA5C            | 4.99 | 5.35 | 4.68 |
| HTR3A              | 4.99 | 5.52 | 4.69 |
| FAM46B             | 4.99 | 5.37 | 4.55 |
| TNN                | 4.99 | 5.61 | 4.71 |
| MYBPH              | 4.99 | 5.36 | 4.64 |
| YTHDF2             | 4.99 | 5.17 | 4.47 |
| TTC18              | 4.99 | 5.57 | 4.41 |
| ICMT               | 4.99 | 5.60 | 4.23 |
| ASMT               | 4.99 | 5.18 | 4.55 |
| PLA2G15            | 4.99 | 5.31 | 4.30 |
| EPO                | 4.99 | 5.24 | 4.74 |
| OR2AG1             | 4.99 | 5.54 | 4.25 |
| ULK3               | 4.99 | 5.22 | 4.52 |
| OTTHUMG00000015138 | 4.99 | 5.41 | 4.59 |
| CSNK1G1            | 4.99 | 5.26 | 4.58 |
| LOC100130950       | 4.99 | 5.35 | 4.46 |
| HAUS8              | 4.99 | 5.34 | 4.63 |
| DNM1P35            | 4.99 | 5.58 | 4.71 |
| PCDHB15            | 4.99 | 5.61 | 4.12 |
| NEURL1B            | 4.99 | 5.22 | 4.84 |
| TBC1D29            | 4.99 | 5.60 | 4.48 |
| CALML3             | 4.99 | 5.39 | 4.56 |
| FAM53C             | 4.99 | 5.29 | 4.57 |

|                    |      |      |      |
|--------------------|------|------|------|
| MIR3179-1          | 4.99 | 5.53 | 4.61 |
| FHL3               | 4.99 | 5.71 | 4.53 |
| ZNF669             | 4.99 | 5.31 | 4.40 |
| ABHD15             | 4.99 | 5.32 | 4.49 |
| LONP1              | 4.99 | 5.21 | 4.52 |
| MSANTD4            | 4.99 | 5.57 | 4.21 |
| GCDH               | 4.99 | 5.13 | 4.83 |
| DARS2              | 4.99 | 5.31 | 4.74 |
| ZNF14              | 4.99 | 5.44 | 4.24 |
| SLX4               | 4.99 | 5.14 | 4.59 |
| ZNF597             | 4.99 | 5.22 | 4.67 |
| BPIFB3             | 4.99 | 5.35 | 4.68 |
| CBS                | 4.99 | 5.54 | 4.42 |
| PVR                | 4.99 | 5.25 | 4.51 |
| LYPD2              | 4.99 | 5.27 | 4.72 |
| LOC200772          | 4.99 | 5.32 | 4.62 |
| SEPT4              | 4.99 | 5.73 | 4.25 |
| HIST2H2BC          | 4.99 | 5.69 | 4.49 |
| KCNJ4              | 4.99 | 5.44 | 4.35 |
| SLC25A14           | 4.99 | 5.33 | 4.58 |
| WDSUB1             | 4.98 | 5.32 | 4.47 |
| RPS6KA2            | 4.98 | 5.23 | 4.60 |
| MIRLET7D           | 4.98 | 5.32 | 4.61 |
| RABL6              | 4.98 | 5.22 | 4.62 |
| HCCAT5             | 4.98 | 5.42 | 4.37 |
| LRWD1              | 4.98 | 5.41 | 4.56 |
| LOC100288594       | 4.98 | 5.25 | 4.62 |
| C10orf99           | 4.98 | 5.37 | 4.64 |
| OTTHUMG00000162202 | 4.98 | 5.48 | 4.29 |
| IBA57              | 4.98 | 5.63 | 4.64 |
| LRRC3              | 4.98 | 5.39 | 4.67 |
| TRBV19             | 4.98 | 5.40 | 4.66 |
| TTF2               | 4.98 | 5.36 | 4.51 |
| NYAP1              | 4.98 | 5.41 | 4.42 |
| MARK4              | 4.98 | 5.20 | 4.54 |
| TMEM136            | 4.98 | 5.35 | 4.22 |
| SEC31B             | 4.98 | 5.32 | 4.63 |
| GLP1R              | 4.98 | 5.27 | 4.71 |
| OR511              | 4.98 | 6.03 | 4.10 |
| SNCB               | 4.98 | 5.23 | 4.66 |
| PSMD5              | 4.98 | 5.68 | 4.12 |
| GPR1               | 4.98 | 6.39 | 3.65 |
| MED19              | 4.98 | 5.22 | 4.64 |
| FJX1               | 4.98 | 5.60 | 4.29 |
| APBA3              | 4.98 | 5.23 | 4.64 |
| LOC100133315       | 4.98 | 5.26 | 4.40 |
| TTC9               | 4.98 | 6.10 | 4.06 |
| DNHD1              | 4.98 | 5.28 | 4.72 |
| ZNF839             | 4.98 | 5.27 | 4.52 |

|                    |      |      |      |
|--------------------|------|------|------|
| LOC339874          | 4.98 | 5.59 | 4.53 |
| CDC20              | 4.98 | 5.51 | 4.50 |
| ZNF564             | 4.98 | 5.54 | 4.34 |
| ELANE              | 4.98 | 5.16 | 4.75 |
| MED22              | 4.98 | 5.35 | 4.76 |
| SEMA3G             | 4.98 | 5.36 | 4.79 |
| SCIMP              | 4.98 | 5.89 | 4.63 |
| TNFAIP8L3          | 4.98 | 5.41 | 4.29 |
| HIRIP3             | 4.98 | 5.38 | 4.50 |
| IL2RA              | 4.98 | 5.35 | 4.68 |
| LOC401296          | 4.98 | 5.25 | 4.76 |
| AZGP1P1            | 4.98 | 5.50 | 4.46 |
| GHRHR              | 4.98 | 5.43 | 4.51 |
| LOC729911          | 4.98 | 5.34 | 4.68 |
| TLR9               | 4.98 | 5.35 | 4.61 |
| OTTHUMG00000137387 | 4.98 | 5.83 | 4.18 |
| MTMR9LP            | 4.98 | 5.45 | 4.48 |
| SLC11A1            | 4.98 | 6.27 | 4.54 |
| EEF1DP3            | 4.98 | 5.45 | 4.48 |
| IFT43              | 4.98 | 5.43 | 4.45 |
| EEPDI              | 4.98 | 5.39 | 4.60 |
| MFSD11             | 4.98 | 5.26 | 4.72 |
| MCTP2              | 4.98 | 5.52 | 4.28 |
| DACT3-AS1          | 4.98 | 5.45 | 4.74 |
| FAM109A            | 4.98 | 5.48 | 4.46 |
| USP39              | 4.98 | 5.33 | 4.47 |
| RPH3AL             | 4.98 | 5.33 | 4.46 |
| MRPS2              | 4.98 | 5.48 | 4.78 |
| RORC               | 4.98 | 5.88 | 4.11 |
| BAALC              | 4.98 | 5.50 | 4.22 |
| TRABD2A            | 4.98 | 5.35 | 4.70 |
| CLCNKB             | 4.98 | 5.74 | 4.31 |
| TLR7               | 4.98 | 6.47 | 4.06 |
| DUSP15             | 4.98 | 5.33 | 4.55 |
| EFHD1              | 4.98 | 5.41 | 4.42 |
| SDCBP2-AS1         | 4.98 | 5.28 | 4.51 |
| RIPPLY1            | 4.98 | 5.49 | 4.59 |
| MYL2               | 4.98 | 5.66 | 4.34 |
| ARHGEF33           | 4.98 | 5.25 | 4.64 |
| C14orf183          | 4.98 | 5.51 | 4.55 |
| FCGR2A             | 4.98 | 6.19 | 4.23 |
| METTL12            | 4.98 | 5.53 | 4.44 |
| ZNF174             | 4.98 | 5.29 | 4.50 |
| OR5AU1             | 4.98 | 5.73 | 4.49 |
| LINC00152          | 4.98 | 5.47 | 4.28 |
| FAM163B            | 4.98 | 5.53 | 4.45 |
| PLA2G5             | 4.98 | 5.60 | 4.55 |
| PARS2              | 4.98 | 5.21 | 4.58 |
| DRD4               | 4.98 | 5.39 | 4.67 |

|                    |      |      |      |
|--------------------|------|------|------|
| RFX7               | 4.98 | 5.42 | 4.54 |
| C10orf128          | 4.98 | 5.38 | 4.55 |
| MIR3973            | 4.98 | 5.84 | 4.51 |
| LYPD4              | 4.97 | 5.40 | 4.55 |
| OTTHUMG00000169970 | 4.97 | 5.50 | 4.61 |
| OTTHUMG00000166987 | 4.97 | 5.97 | 4.15 |
| BRD9               | 4.97 | 5.20 | 4.55 |
| LOC729966          | 4.97 | 5.54 | 4.71 |
| MSLN               | 4.97 | 5.32 | 4.60 |
| SCNN1D             | 4.97 | 5.15 | 4.79 |
| MIR222             | 4.97 | 5.97 | 4.43 |
| PGD                | 4.97 | 5.52 | 4.65 |
| OTTHUMG00000160821 | 4.97 | 5.21 | 4.35 |
| PECR               | 4.97 | 5.27 | 4.65 |
| C11orf93           | 4.97 | 5.24 | 4.31 |
| TPK1               | 4.97 | 5.27 | 4.56 |
| CASP10             | 4.97 | 5.36 | 4.24 |
| LOC650293          | 4.97 | 5.94 | 3.75 |
| MEX3D              | 4.97 | 5.35 | 4.61 |
| LOC100287175       | 4.97 | 5.39 | 4.65 |
| CABYR              | 4.97 | 5.42 | 4.60 |
| TUSC5              | 4.97 | 5.64 | 4.56 |
| AGPAT9             | 4.97 | 5.24 | 4.60 |
| LINC00202-1        | 4.97 | 5.51 | 4.46 |
| UHRF1BP1           | 4.97 | 5.60 | 4.18 |
| CUBN               | 4.97 | 5.18 | 4.46 |
| ZAP70              | 4.97 | 5.56 | 4.67 |
| FSCN2              | 4.97 | 5.35 | 4.42 |
| ZSCAN1             | 4.97 | 5.21 | 4.68 |
| DNAH11             | 4.97 | 5.76 | 4.14 |
| LOC100508226       | 4.97 | 5.42 | 4.25 |
| GUCY1A2            | 4.97 | 5.43 | 4.56 |
| LINC00899          | 4.97 | 5.28 | 4.64 |
| GPR135             | 4.97 | 5.38 | 4.13 |
| FAM166B            | 4.97 | 5.17 | 4.66 |
| GPC2               | 4.97 | 5.53 | 4.55 |
| ZNHIT3             | 4.97 | 5.40 | 4.27 |
| G6PD               | 4.97 | 5.21 | 4.75 |
| KLRG2              | 4.97 | 5.25 | 4.77 |
| MYD88              | 4.97 | 5.32 | 4.56 |
| SAA1               | 4.97 | 9.41 | 3.85 |
| GTF2H2             | 4.97 | 5.62 | 4.04 |
| SRSF12             | 4.97 | 5.45 | 4.51 |
| C17orf75           | 4.97 | 5.24 | 4.66 |
| TICAM1             | 4.97 | 5.34 | 4.60 |
| ZBTB8OS            | 4.97 | 5.33 | 4.51 |
| LOC100506343       | 4.97 | 5.28 | 4.66 |
| TNFRSF11A          | 4.97 | 5.66 | 4.49 |
| MIR4273            | 4.97 | 5.69 | 4.10 |

|                    |      |      |      |
|--------------------|------|------|------|
| TRAPPC6A           | 4.97 | 5.38 | 4.63 |
| KLHL11             | 4.97 | 5.51 | 4.61 |
| CYP27C1            | 4.97 | 5.86 | 4.12 |
| NPY6R              | 4.97 | 5.55 | 4.24 |
| CDKN1C             | 4.97 | 5.11 | 4.82 |
| FAM83H-AS1         | 4.97 | 5.24 | 4.60 |
| TSPYL6             | 4.97 | 5.48 | 4.42 |
| IL34               | 4.97 | 5.53 | 4.42 |
| B3GALT6            | 4.97 | 5.50 | 4.41 |
| LOC100505722       | 4.97 | 5.33 | 4.42 |
| TGM4               | 4.97 | 5.36 | 4.56 |
| HOXC12             | 4.97 | 5.41 | 4.64 |
| TNFSF11            | 4.97 | 5.49 | 4.65 |
| ZNF891             | 4.97 | 5.29 | 4.56 |
| TLR5               | 4.97 | 5.51 | 4.47 |
| DLGAP3             | 4.97 | 5.43 | 4.60 |
| TMEM178A           | 4.97 | 5.28 | 4.57 |
| VAC14-AS1          | 4.97 | 5.47 | 4.73 |
| OTTHUMG00000014933 | 4.97 | 6.31 | 3.41 |
| HMG5               | 4.97 | 5.41 | 4.53 |
| CAPN6              | 4.97 | 6.59 | 4.13 |
| E2F3               | 4.97 | 5.42 | 4.31 |
| OTTHUMG00000170116 | 4.97 | 5.44 | 4.63 |
| DDIT3              | 4.97 | 5.79 | 4.06 |
| THSD1              | 4.97 | 5.57 | 4.50 |
| SEPT12             | 4.97 | 5.33 | 4.70 |
| CCDC122            | 4.97 | 5.22 | 4.54 |
| C14orf93           | 4.97 | 5.33 | 4.67 |
| RASSF7             | 4.97 | 5.47 | 4.35 |
| ARHGEF3            | 4.97 | 5.55 | 4.66 |
| LINC00338          | 4.97 | 5.38 | 4.30 |
| FARS2              | 4.97 | 5.32 | 4.32 |
| MIR551B            | 4.97 | 5.71 | 4.47 |
| SMO                | 4.97 | 5.32 | 4.73 |
| STK32B             | 4.97 | 5.70 | 4.02 |
| SLC22A6            | 4.97 | 5.33 | 4.52 |
| CFTR               | 4.97 | 5.70 | 4.32 |
| RDX                | 4.97 | 5.31 | 4.29 |
| C3orf52            | 4.97 | 5.41 | 4.55 |
| FBF1               | 4.97 | 5.31 | 4.66 |
| PACSIN3            | 4.97 | 5.23 | 4.66 |
| KCNIP2-AS1         | 4.97 | 5.50 | 4.64 |
| ZNF547             | 4.96 | 5.23 | 4.38 |
| C9orf123           | 4.96 | 5.15 | 4.36 |
| OTTHUMG00000172027 | 4.96 | 6.01 | 4.28 |
| FAM133DP           | 4.96 | 5.47 | 4.17 |
| TXN2               | 4.96 | 5.21 | 4.71 |
| DNMBP-AS1          | 4.96 | 5.25 | 4.65 |
| FGF14-IT1          | 4.96 | 5.51 | 4.50 |

|              |      |      |      |
|--------------|------|------|------|
| SCNN1A       | 4.96 | 5.72 | 4.12 |
| KIAA0513     | 4.96 | 5.30 | 4.55 |
| RBM43        | 4.96 | 5.43 | 4.40 |
| EPB41L5      | 4.96 | 5.15 | 4.76 |
| LINC00856    | 4.96 | 5.40 | 4.52 |
| TBX19        | 4.96 | 5.53 | 4.61 |
| LOC100508227 | 4.96 | 5.49 | 4.49 |
| SEC14L5      | 4.96 | 5.23 | 4.56 |
| ZBED5-AS1    | 4.96 | 5.28 | 4.69 |
| CTNNB1       | 4.96 | 5.54 | 4.35 |
| IL17C        | 4.96 | 5.39 | 4.54 |
| ENOX2        | 4.96 | 5.47 | 4.04 |
| THEM4        | 4.96 | 5.58 | 4.37 |
| NOC4L        | 4.96 | 5.17 | 4.52 |
| GOLGA8DP     | 4.96 | 5.39 | 4.54 |
| RUNDC1       | 4.96 | 5.30 | 4.75 |
| MPV17L2      | 4.96 | 5.16 | 4.64 |
| RNASE2       | 4.96 | 5.62 | 4.06 |
| LOC100128288 | 4.96 | 5.44 | 4.47 |
| IRX2         | 4.96 | 5.34 | 4.53 |
| SPRY1        | 4.96 | 5.58 | 4.06 |
| TNFSF14      | 4.96 | 5.25 | 4.69 |
| LOC100287879 | 4.96 | 5.65 | 4.59 |
| PIRT         | 4.96 | 5.19 | 4.65 |
| C9orf131     | 4.96 | 5.43 | 4.60 |
| TEK          | 4.96 | 5.79 | 4.10 |
| TMEM194B     | 4.96 | 5.32 | 4.75 |
| DZIP1L       | 4.96 | 5.34 | 4.62 |
| LOC338963    | 4.96 | 5.36 | 4.73 |
| LOC254128    | 4.96 | 5.20 | 4.37 |
| ADCK4        | 4.96 | 5.42 | 4.37 |
| ARHGAP27     | 4.96 | 5.49 | 4.56 |
| OR10V2P      | 4.96 | 5.50 | 4.40 |
| RRM2         | 4.96 | 5.39 | 4.39 |
| ZBTB8A       | 4.96 | 5.49 | 4.35 |
| BAHCC1       | 4.96 | 5.51 | 4.59 |
| LOC100507447 | 4.96 | 5.85 | 4.25 |
| RNA5SP35     | 4.96 | 5.92 | 4.17 |
| FOXD2        | 4.96 | 5.30 | 4.70 |
| DOLPP1       | 4.96 | 5.29 | 4.46 |
| MIR193B      | 4.96 | 5.36 | 4.49 |
| CHST5        | 4.96 | 5.53 | 4.67 |
| ZSWIM1       | 4.96 | 5.26 | 4.59 |
| MCC          | 4.96 | 5.29 | 4.50 |
| IGSF10       | 4.96 | 5.52 | 4.60 |
| PRMT10       | 4.96 | 5.25 | 4.63 |
| MIR504       | 4.96 | 5.27 | 4.53 |
| COMMD8       | 4.96 | 5.57 | 4.54 |
| MIR371A      | 4.96 | 5.54 | 4.45 |

|                    |      |      |      |
|--------------------|------|------|------|
| MUC5B              | 4.96 | 5.23 | 4.69 |
| SH3GL1             | 4.96 | 5.44 | 4.60 |
| ABHD12B            | 4.96 | 5.44 | 4.46 |
| GUSBP11            | 4.96 | 5.49 | 4.54 |
| LOC100288637       | 4.96 | 6.10 | 4.49 |
| CEP170B            | 4.96 | 5.19 | 4.77 |
| LOC646719          | 4.96 | 5.61 | 4.46 |
| ZFAND6             | 4.96 | 5.30 | 4.56 |
| TMCC2              | 4.96 | 5.39 | 4.62 |
| OTTHUMG00000171048 | 4.96 | 5.21 | 4.67 |
| ACTR1B             | 4.96 | 5.45 | 4.55 |
| MIRLET7E           | 4.96 | 5.42 | 4.64 |
| ZDHC15             | 4.96 | 5.42 | 4.53 |
| NUDCD3             | 4.96 | 5.28 | 4.46 |
| CXXC11             | 4.96 | 5.25 | 4.70 |
| OTTHUMG00000021366 | 4.96 | 5.30 | 4.63 |
| DOC2B              | 4.96 | 5.46 | 4.49 |
| CT47B1             | 4.96 | 5.26 | 4.42 |
| DHX57              | 4.96 | 5.22 | 4.51 |
| PQLC2              | 4.96 | 5.18 | 4.77 |
| FOXE3              | 4.95 | 5.51 | 4.58 |
| RNU2-7P            | 4.95 | 5.70 | 3.81 |
| LOC202781          | 4.95 | 5.23 | 4.58 |
| CD164L2            | 4.95 | 5.34 | 4.50 |
| RASGRP3            | 4.95 | 5.77 | 4.03 |
| FEZ2               | 4.95 | 5.42 | 4.49 |
| CEP78              | 4.95 | 5.39 | 4.44 |
| OTTHUMG00000018097 | 4.95 | 5.39 | 4.50 |
| DHCR7              | 4.95 | 5.26 | 4.46 |
| DHX58              | 4.95 | 5.43 | 4.61 |
| LOC100128059       | 4.95 | 5.59 | 4.48 |
| TMEM211            | 4.95 | 5.44 | 4.33 |
| ABHD14A-ACY1       | 4.95 | 5.16 | 4.67 |
| UIMC1              | 4.95 | 5.29 | 4.47 |
| EPHB6              | 4.95 | 5.42 | 4.66 |
| MIR494             | 4.95 | 5.79 | 4.35 |
| LINC00851          | 4.95 | 5.27 | 4.61 |
| HELQ               | 4.95 | 5.21 | 4.60 |
| CCL27              | 4.95 | 5.37 | 4.65 |
| NELFB              | 4.95 | 5.42 | 4.73 |
| IGDCC3             | 4.95 | 5.44 | 4.55 |
| SLC16A13           | 4.95 | 5.20 | 4.46 |
| OTTHUMG00000165485 | 4.95 | 5.46 | 4.64 |
| HCG20              | 4.95 | 5.55 | 4.70 |
| C8G                | 4.95 | 5.50 | 4.52 |
| HOXD8              | 4.95 | 5.33 | 4.58 |
| LOC646626          | 4.95 | 5.11 | 4.71 |
| LOC642131          | 4.95 | 5.66 | 4.31 |
| SNORD114-13        | 4.95 | 6.78 | 3.57 |



|                    |      |      |      |
|--------------------|------|------|------|
| LOC100128531       | 4.95 | 5.34 | 4.63 |
| NUDT18             | 4.95 | 5.57 | 4.59 |
| LINC00926          | 4.95 | 5.12 | 4.73 |
| TCAIM              | 4.95 | 5.27 | 4.39 |
| HBG2               | 4.95 | 5.48 | 4.60 |
| CACNA2D2           | 4.95 | 5.20 | 4.75 |
| RNA5SP160          | 4.95 | 5.85 | 3.87 |
| GPR21              | 4.95 | 5.35 | 4.38 |
| LOC100507564       | 4.95 | 5.16 | 4.62 |
| ST3GAL3            | 4.95 | 5.24 | 4.61 |
| AQP10              | 4.95 | 5.45 | 4.62 |
| LAYN               | 4.95 | 5.24 | 4.69 |
| MINOS1P1           | 4.95 | 5.47 | 4.49 |
| SLC52A1            | 4.95 | 5.61 | 4.39 |
| LOC100996291       | 4.95 | 5.43 | 4.34 |
| PLCB4              | 4.95 | 5.42 | 4.59 |
| RLTPR              | 4.95 | 5.17 | 4.67 |
| ABCB6              | 4.95 | 5.45 | 4.47 |
| ZNF568             | 4.95 | 5.32 | 4.61 |
| SNORD109A          | 4.95 | 5.49 | 4.57 |
| C19orf82           | 4.95 | 5.43 | 4.36 |
| HMCN2              | 4.95 | 5.07 | 4.70 |
| TAC3               | 4.95 | 5.51 | 4.36 |
| OBSL1              | 4.95 | 5.24 | 4.59 |
| C7orf49            | 4.95 | 5.23 | 4.50 |
| CT47A6             | 4.95 | 5.22 | 4.35 |
| OTTHUMG00000160063 | 4.95 | 5.47 | 4.67 |
| HDAC4              | 4.95 | 5.29 | 4.56 |
| ZNF276             | 4.95 | 5.27 | 4.69 |
| OTTHUMG00000165386 | 4.95 | 5.27 | 4.71 |
| RNA5SP320          | 4.95 | 5.67 | 4.09 |
| ZNF737             | 4.95 | 5.68 | 3.91 |
| LOC644172          | 4.95 | 5.34 | 4.58 |
| MIR181A1HG         | 4.95 | 5.47 | 4.29 |
| CLEC4F             | 4.95 | 5.43 | 4.46 |
| LOR                | 4.95 | 5.37 | 4.63 |
| WNT9A              | 4.95 | 5.62 | 4.56 |
| POLR3B             | 4.95 | 5.36 | 4.41 |
| RASGRP4            | 4.95 | 5.18 | 4.65 |
| NPAS3              | 4.95 | 5.71 | 4.49 |
| CRYGD              | 4.95 | 5.43 | 4.67 |
| MPHOSPH9           | 4.95 | 5.36 | 4.56 |
| FLJ37644           | 4.95 | 5.47 | 4.48 |
| CTSH               | 4.95 | 5.37 | 4.64 |
| PPCDC              | 4.95 | 5.36 | 4.61 |
| TMEM221            | 4.95 | 5.39 | 4.62 |
| RDH10              | 4.95 | 5.59 | 4.74 |
| ING5               | 4.95 | 5.36 | 4.69 |
| PUS1               | 4.95 | 5.26 | 4.62 |

|                    |      |      |      |
|--------------------|------|------|------|
| MIR543             | 4.95 | 5.69 | 4.17 |
| OTTHUMG00000152620 | 4.95 | 6.04 | 4.39 |
| CCDC120            | 4.95 | 5.34 | 4.69 |
| CYP17A1-AS1        | 4.95 | 5.27 | 4.56 |
| POU3F2             | 4.95 | 5.13 | 4.66 |
| TBCE               | 4.95 | 5.23 | 4.63 |
| PSKH1              | 4.95 | 5.29 | 4.65 |
| LOC100996345       | 4.94 | 5.50 | 4.52 |
| C11orf80           | 4.94 | 5.41 | 4.55 |
| HCAR1              | 4.94 | 5.43 | 4.54 |
| NUFIP1             | 4.94 | 5.45 | 4.06 |
| CRB3               | 4.94 | 5.28 | 4.66 |
| CD83               | 4.94 | 5.94 | 4.51 |
| PSMC3IP            | 4.94 | 5.42 | 4.50 |
| KDM5C              | 4.94 | 5.37 | 4.36 |
| RMND5B             | 4.94 | 5.32 | 4.51 |
| EPB42              | 4.94 | 5.27 | 4.66 |
| RNA5SP182          | 4.94 | 5.90 | 4.40 |
| PKMYT1             | 4.94 | 5.22 | 4.46 |
| SIGLEC10           | 4.94 | 5.36 | 4.36 |
| GRAMD1B            | 4.94 | 5.30 | 4.46 |
| ETV1               | 4.94 | 5.33 | 4.63 |
| EVX1               | 4.94 | 5.25 | 4.55 |
| PHLDB3             | 4.94 | 5.61 | 4.57 |
| PDE1B              | 4.94 | 5.11 | 4.72 |
| LOC729275          | 4.94 | 5.25 | 4.16 |
| ATP2B2-IT1         | 4.94 | 5.13 | 4.67 |
| NCAPD3             | 4.94 | 5.13 | 4.80 |
| RNA5SP385          | 4.94 | 6.26 | 3.18 |
| LYRM9              | 4.94 | 5.22 | 4.50 |
| ABT1               | 4.94 | 5.21 | 4.48 |
| C19orf68           | 4.94 | 5.35 | 4.39 |
| ZNF620             | 4.94 | 5.36 | 4.38 |
| LOC100505761       | 4.94 | 5.33 | 4.47 |
| PROP1              | 4.94 | 5.36 | 4.52 |
| BMS1P2             | 4.94 | 5.25 | 4.40 |
| NDUFAF3            | 4.94 | 5.21 | 4.52 |
| C22orf46           | 4.94 | 5.20 | 4.72 |
| ZKSCAN8            | 4.94 | 5.33 | 4.50 |
| MOB3C              | 4.94 | 5.37 | 4.44 |
| KIFC2              | 4.94 | 5.29 | 4.55 |
| OTTHUMG00000168493 | 4.94 | 5.62 | 4.28 |
| UBTD1              | 4.94 | 5.24 | 4.55 |
| TM2D2              | 4.94 | 5.47 | 4.32 |
| FCHO1              | 4.94 | 5.26 | 4.75 |
| POLRMT             | 4.94 | 5.39 | 4.66 |
| MALT1              | 4.94 | 5.23 | 4.63 |
| SMTNL1             | 4.94 | 5.29 | 4.70 |
| KCNK15             | 4.94 | 5.29 | 4.25 |

|                    |      |      |      |
|--------------------|------|------|------|
| OTTHUMG00000175754 | 4.94 | 5.20 | 4.66 |
| LIAS               | 4.94 | 5.41 | 4.09 |
| C1QTNF8            | 4.94 | 5.48 | 4.59 |
| DSCR3              | 4.94 | 5.27 | 4.38 |
| TMEM44             | 4.94 | 5.40 | 4.46 |
| OTTHUMG00000154637 | 4.94 | 5.86 | 3.98 |
| C19orf77           | 4.94 | 5.52 | 4.32 |
| TTC21A             | 4.94 | 5.16 | 4.64 |
| RBP2               | 4.94 | 5.27 | 4.23 |
| LONRF1             | 4.94 | 5.48 | 4.06 |
| FAM13C             | 4.94 | 5.47 | 4.44 |
| WVOX               | 4.94 | 5.19 | 4.71 |
| LRTM2              | 4.94 | 5.39 | 4.38 |
| TSPO2              | 4.94 | 5.30 | 4.54 |
| ATHL1              | 4.94 | 5.31 | 4.45 |
| SASS6              | 4.94 | 5.36 | 4.37 |
| B4GALNT1           | 4.94 | 5.40 | 4.48 |
| UBQLN3             | 4.94 | 5.37 | 4.48 |
| HS3ST3A1           | 4.94 | 5.33 | 4.63 |
| LOC100506965       | 4.94 | 5.93 | 3.65 |
| ELMOD3             | 4.94 | 5.18 | 4.71 |
| FBXW9              | 4.94 | 5.72 | 4.54 |
| SPIN3              | 4.94 | 5.38 | 4.35 |
| FGF13              | 4.94 | 5.22 | 4.75 |
| LOC100130502       | 4.94 | 5.55 | 4.43 |
| OTTHUMG00000170998 | 4.94 | 5.38 | 4.43 |
| HSPA4L             | 4.94 | 5.72 | 4.25 |
| FAM221B            | 4.94 | 5.20 | 4.67 |
| PCGF6              | 4.94 | 5.23 | 4.79 |
| TRO                | 4.94 | 5.36 | 4.58 |
| MIR501             | 4.94 | 5.23 | 4.48 |
| IL27               | 4.94 | 5.14 | 4.62 |
| LOC100507376       | 4.94 | 5.52 | 4.57 |
| GPBAR1             | 4.94 | 5.30 | 4.53 |
| RMI2               | 4.94 | 5.33 | 4.68 |
| ZNF816-ZNF321P     | 4.94 | 5.16 | 4.62 |
| KIF11              | 4.94 | 5.67 | 4.46 |
| DRG2               | 4.94 | 5.06 | 4.75 |
| LNX2               | 4.94 | 5.45 | 4.27 |
| IL10RB-AS1         | 4.94 | 5.28 | 4.65 |
| CARS-AS1           | 4.94 | 5.20 | 4.66 |
| SHISA5             | 4.94 | 5.37 | 4.48 |
| NOD1               | 4.94 | 5.47 | 4.42 |
| ADAMTS13           | 4.94 | 5.42 | 4.45 |
| PATZ1              | 4.94 | 5.44 | 4.61 |
| SFT2D3             | 4.94 | 5.36 | 4.44 |
| LOC729870          | 4.94 | 5.33 | 4.50 |
| TPSG1              | 4.94 | 5.47 | 4.49 |
| KLF1               | 4.94 | 5.32 | 4.69 |

|                    |      |      |      |
|--------------------|------|------|------|
| DNAAF3             | 4.94 | 5.23 | 4.77 |
| OTTHUMG00000152739 | 4.94 | 5.33 | 4.52 |
| PJA1               | 4.94 | 5.50 | 4.43 |
| MIR609             | 4.94 | 5.72 | 4.22 |
| TSPAN31            | 4.94 | 5.25 | 4.56 |
| PPP1R16A           | 4.94 | 5.16 | 4.73 |
| RNF25              | 4.94 | 5.14 | 4.56 |
| TTN                | 4.94 | 5.27 | 4.66 |
| OTTHUMG00000022086 | 4.94 | 5.82 | 3.83 |
| BORA               | 4.94 | 5.29 | 4.60 |
| BCAR1              | 4.93 | 5.27 | 4.54 |
| C20orf173          | 4.93 | 5.28 | 4.50 |
| CDCP1              | 4.93 | 5.55 | 4.46 |
| HOXB6              | 4.93 | 5.38 | 4.37 |
| ZNF32-AS1          | 4.93 | 5.42 | 4.03 |
| LEPROTL1           | 4.93 | 5.47 | 4.14 |
| C1RL-AS1           | 4.93 | 5.46 | 4.51 |
| FTCD-AS1           | 4.93 | 5.50 | 4.59 |
| LINC00319          | 4.93 | 5.39 | 4.59 |
| TRABD2B            | 4.93 | 5.36 | 4.60 |
| IFT140             | 4.93 | 5.26 | 4.29 |
| GPR146             | 4.93 | 5.40 | 4.66 |
| C10orf82           | 4.93 | 5.25 | 4.61 |
| FICD               | 4.93 | 5.13 | 4.64 |
| POC1B-GALNT4       | 4.93 | 5.23 | 4.45 |
| MUC6               | 4.93 | 5.14 | 4.69 |
| CLCN2              | 4.93 | 5.39 | 4.62 |
| XIAP               | 4.93 | 5.18 | 4.65 |
| KMT2B              | 4.93 | 5.21 | 4.55 |
| OTTHUMG00000157240 | 4.93 | 5.21 | 4.60 |
| HEATR2             | 4.93 | 5.27 | 4.49 |
| KRTAP10-2          | 4.93 | 5.22 | 4.49 |
| HSDL1              | 4.93 | 5.49 | 4.42 |
| CLEC1A             | 4.93 | 5.51 | 4.41 |
| MAFF               | 4.93 | 5.23 | 4.69 |
| STXBP2             | 4.93 | 5.31 | 4.60 |
| ADAMTS1            | 4.93 | 5.84 | 4.22 |
| SEC1P              | 4.93 | 5.20 | 4.63 |
| SAMD14             | 4.93 | 5.41 | 4.55 |
| LILRB5             | 4.93 | 5.18 | 4.58 |
| LOC100287177       | 4.93 | 5.35 | 4.28 |
| FGD2               | 4.93 | 5.69 | 4.52 |
| SAMD13             | 4.93 | 5.16 | 4.67 |
| LRRC10             | 4.93 | 5.65 | 4.54 |
| SNORD94            | 4.93 | 5.58 | 4.57 |
| FAM198B            | 4.93 | 5.20 | 4.61 |
| PRAMEF22           | 4.93 | 5.76 | 3.50 |
| HMP19              | 4.93 | 5.37 | 4.46 |
| LOC100505549       | 4.93 | 5.36 | 4.62 |

|             |      |      |      |
|-------------|------|------|------|
| ZNF611      | 4.93 | 5.55 | 4.45 |
| MMP23B      | 4.93 | 5.34 | 4.10 |
| ZNF713      | 4.93 | 5.20 | 4.42 |
| TMEM31      | 4.93 | 5.41 | 4.58 |
| SGK1        | 4.93 | 5.63 | 4.28 |
| TTC36       | 4.93 | 5.40 | 4.44 |
| ABCA3       | 4.93 | 5.31 | 4.65 |
| EHBP1L1     | 4.93 | 5.49 | 4.47 |
| EEFSEC      | 4.93 | 5.21 | 4.50 |
| ZMYND12     | 4.93 | 5.30 | 4.46 |
| EMILIN1     | 4.93 | 5.17 | 4.63 |
| PDCD1LG2    | 4.93 | 5.39 | 4.18 |
| ZNF708      | 4.93 | 5.44 | 4.38 |
| SNORD115-42 | 4.93 | 5.86 | 3.84 |
| CLDN7       | 4.93 | 5.22 | 4.55 |
| DDX31       | 4.93 | 5.31 | 4.45 |
| CD27-AS1    | 4.93 | 5.08 | 4.73 |
| LOC81691    | 4.93 | 5.17 | 4.64 |
| DTX3        | 4.93 | 5.26 | 4.48 |
| METTL16     | 4.93 | 5.14 | 4.63 |
| RPTOR       | 4.93 | 5.34 | 4.63 |
| TSEN15      | 4.93 | 5.42 | 4.66 |
| GBP4        | 4.93 | 5.88 | 4.21 |
| ZNF84       | 4.93 | 5.44 | 4.16 |
| PACSIN1     | 4.93 | 5.32 | 4.53 |
| GRID2IP     | 4.93 | 5.15 | 4.61 |
| KRT6B       | 4.93 | 5.78 | 4.20 |
| CCDC102A    | 4.92 | 5.25 | 4.63 |
| ADCY7       | 4.92 | 5.55 | 4.15 |
| ZNF417      | 4.92 | 5.46 | 4.31 |
| ADAT2       | 4.92 | 5.25 | 4.55 |
| BRMS1       | 4.92 | 5.32 | 4.21 |
| TRIM31-AS1  | 4.92 | 5.41 | 4.51 |
| RPGRIP1L    | 4.92 | 5.55 | 4.55 |
| TTC31       | 4.92 | 5.31 | 4.50 |
| C11orf34    | 4.92 | 5.32 | 4.55 |
| TMED8       | 4.92 | 5.14 | 4.72 |
| GCAT        | 4.92 | 5.29 | 4.60 |
| NFE2L3      | 4.92 | 5.55 | 4.60 |
| SH2B3       | 4.92 | 5.32 | 4.61 |
| SGOL1-AS1   | 4.92 | 5.36 | 4.44 |
| ZNF697      | 4.92 | 5.13 | 4.65 |
| ADM2        | 4.92 | 5.31 | 4.51 |
| CYP2W1      | 4.92 | 5.20 | 4.26 |
| PCSK1       | 4.92 | 5.28 | 4.60 |
| PKLR        | 4.92 | 5.28 | 4.61 |
| KIRREL3     | 4.92 | 5.28 | 4.38 |
| EXTL2       | 4.92 | 5.53 | 4.45 |
| PIGV        | 4.92 | 5.43 | 4.63 |

|                    |      |      |      |
|--------------------|------|------|------|
| MED9               | 4.92 | 5.32 | 4.45 |
| ARAP3              | 4.92 | 5.43 | 4.57 |
| KLK4               | 4.92 | 5.26 | 4.68 |
| MEN1               | 4.92 | 5.30 | 4.68 |
| TRIM62             | 4.92 | 5.30 | 4.63 |
| BZRAP1             | 4.92 | 5.27 | 4.53 |
| MIR1260A           | 4.92 | 5.79 | 4.49 |
| METTL23            | 4.92 | 5.38 | 4.24 |
| PPIF               | 4.92 | 5.28 | 4.37 |
| FAM118B            | 4.92 | 5.27 | 4.33 |
| ZNF19              | 4.92 | 5.31 | 4.45 |
| GMPPB              | 4.92 | 5.21 | 4.72 |
| FFAR1              | 4.92 | 5.20 | 4.32 |
| PTPRB              | 4.92 | 6.27 | 3.44 |
| MT1A               | 4.92 | 5.72 | 3.62 |
| GRWD1              | 4.92 | 5.19 | 4.65 |
| DNAJB7             | 4.92 | 5.25 | 4.47 |
| PAPLN              | 4.92 | 5.19 | 4.66 |
| MIR378E            | 4.92 | 5.72 | 3.64 |
| SNORA72            | 4.92 | 5.20 | 4.53 |
| APOBEC3F           | 4.92 | 5.76 | 4.41 |
| TM4SF19            | 4.92 | 5.60 | 4.41 |
| FLJ35816           | 4.92 | 5.44 | 4.55 |
| NUP107             | 4.92 | 5.29 | 4.26 |
| UBN1               | 4.92 | 5.38 | 4.33 |
| PDGFB              | 4.92 | 5.31 | 4.57 |
| POP7               | 4.92 | 5.32 | 4.45 |
| DGKI               | 4.92 | 6.27 | 4.09 |
| ZNF180             | 4.92 | 5.39 | 4.40 |
| CARD10             | 4.92 | 5.29 | 4.46 |
| OTTHUMG00000163325 | 4.92 | 5.90 | 4.34 |
| PARK2              | 4.92 | 5.21 | 4.56 |
| C9orf91            | 4.92 | 5.33 | 4.53 |
| ASGR1              | 4.92 | 5.24 | 4.58 |
| GCK                | 4.92 | 5.10 | 4.68 |
| SLC39A3            | 4.92 | 5.24 | 4.42 |
| LIPA               | 4.92 | 5.20 | 4.24 |
| UBB                | 4.92 | 5.28 | 4.37 |
| OTTHUMG00000164068 | 4.92 | 5.21 | 4.49 |
| TMEM161B           | 4.92 | 5.34 | 4.52 |
| MARK2              | 4.92 | 5.39 | 4.49 |
| NPTX2              | 4.92 | 5.11 | 4.78 |
| EPHB4              | 4.92 | 5.37 | 4.47 |
| SCGB1B2P           | 4.92 | 5.41 | 4.38 |
| NPHP4              | 4.92 | 5.18 | 4.64 |
| OSGEP              | 4.92 | 5.48 | 4.39 |
| LOC100127940       | 4.92 | 5.42 | 4.47 |
| ZNF721             | 4.92 | 5.51 | 4.25 |
| TFAP4              | 4.92 | 5.54 | 4.58 |

|                    |      |      |      |
|--------------------|------|------|------|
| NHEJ1              | 4.92 | 5.19 | 4.54 |
| SIGLEC14           | 4.92 | 5.58 | 4.55 |
| SMTNL2             | 4.92 | 5.29 | 4.50 |
| MB21D2             | 4.92 | 5.22 | 4.37 |
| SLC18B1            | 4.92 | 5.55 | 4.50 |
| PDPR               | 4.92 | 5.42 | 3.58 |
| XPNPEP2            | 4.92 | 5.27 | 4.43 |
| BID                | 4.92 | 5.28 | 4.52 |
| OTTHUMG00000041231 | 4.92 | 5.62 | 4.26 |
| LOC148696          | 4.92 | 5.40 | 4.30 |
| ELMOD2             | 4.91 | 5.87 | 4.09 |
| UCHL1              | 4.91 | 5.29 | 4.59 |
| LOC100507291       | 4.91 | 5.16 | 4.65 |
| FLRT1              | 4.91 | 5.30 | 4.40 |
| PRIM2              | 4.91 | 5.32 | 4.51 |
| REG3G              | 4.91 | 5.49 | 4.32 |
| EFNA1              | 4.91 | 5.47 | 4.38 |
| C9orf69            | 4.91 | 5.08 | 4.61 |
| OTTHUMG00000162866 | 4.91 | 5.40 | 4.58 |
| CNOT7              | 4.91 | 5.11 | 4.63 |
| SDR39U1            | 4.91 | 5.18 | 4.68 |
| GP6                | 4.91 | 5.19 | 4.53 |
| OTOS               | 4.91 | 5.15 | 4.68 |
| OTTHUMG00000170764 | 4.91 | 5.56 | 4.27 |
| NCF2               | 4.91 | 6.18 | 4.21 |
| SRGAP3             | 4.91 | 5.22 | 4.67 |
| LEF1               | 4.91 | 5.49 | 4.26 |
| KCNK2              | 4.91 | 5.93 | 4.54 |
| SH2B1              | 4.91 | 5.24 | 4.52 |
| NLRP3              | 4.91 | 5.35 | 4.22 |
| BACE2-IT1          | 4.91 | 5.48 | 4.48 |
| CEND1              | 4.91 | 5.27 | 4.64 |
| RMDN3              | 4.91 | 5.39 | 4.34 |
| HCN3               | 4.91 | 5.21 | 4.51 |
| GGA1               | 4.91 | 5.30 | 4.66 |
| PM20D2             | 4.91 | 5.38 | 4.36 |
| INO80C             | 4.91 | 5.30 | 4.50 |
| SLC22A9            | 4.91 | 5.20 | 4.58 |
| GRM1               | 4.91 | 5.29 | 4.59 |
| SMCR7L             | 4.91 | 5.26 | 4.52 |
| NBEAL2             | 4.91 | 5.18 | 4.78 |
| OR10K2             | 4.91 | 5.39 | 4.30 |
| SLC16A5            | 4.91 | 5.38 | 4.54 |
| TUBB4A             | 4.91 | 5.64 | 4.39 |
| C4orf33            | 4.91 | 5.46 | 4.37 |
| VAR5               | 4.91 | 5.23 | 4.54 |
| TRIM16L            | 4.91 | 5.38 | 4.52 |
| MYO18B             | 4.91 | 5.34 | 4.72 |
| FEV                | 4.91 | 5.29 | 4.68 |

|                    |      |      |      |
|--------------------|------|------|------|
| CATSPER3           | 4.91 | 5.24 | 4.58 |
| GFAP               | 4.91 | 5.46 | 4.33 |
| FER1L4             | 4.91 | 5.19 | 4.61 |
| KIRREL3-AS2        | 4.91 | 5.50 | 4.35 |
| LINGO1             | 4.91 | 5.18 | 4.67 |
| FUZ                | 4.91 | 5.27 | 4.73 |
| TOX                | 4.91 | 5.37 | 4.39 |
| C5orf55            | 4.91 | 5.22 | 4.48 |
| KRBA2              | 4.91 | 5.48 | 4.59 |
| EIF1AY             | 4.91 | 5.93 | 3.64 |
| ADAM32             | 4.91 | 5.34 | 4.27 |
| PPIAL4E            | 4.91 | 5.52 | 4.20 |
| MBOAT2             | 4.91 | 5.18 | 4.29 |
| C1orf110           | 4.91 | 5.57 | 4.40 |
| MMP24              | 4.91 | 5.24 | 4.41 |
| KCNK17             | 4.91 | 5.50 | 4.45 |
| PRPSAP1            | 4.91 | 5.26 | 4.53 |
| PAIP2B             | 4.91 | 5.54 | 3.98 |
| SPPL2C             | 4.91 | 5.47 | 4.53 |
| OTTHUMG00000021126 | 4.91 | 5.25 | 4.44 |
| CLDN12             | 4.91 | 5.36 | 4.38 |
| CTDSP1             | 4.91 | 5.20 | 4.34 |
| PTCD2              | 4.91 | 5.28 | 4.60 |
| MSX2               | 4.91 | 5.27 | 3.91 |
| OTTHUMG00000180598 | 4.91 | 5.28 | 4.66 |
| UPRT               | 4.91 | 5.38 | 4.40 |
| OTTHUMG00000032468 | 4.91 | 5.46 | 4.44 |
| CRYBA4             | 4.91 | 5.25 | 4.38 |
| ECEL1              | 4.91 | 5.38 | 4.56 |
| NR1H2              | 4.91 | 5.63 | 4.64 |
| LOC101059939       | 4.91 | 5.29 | 4.20 |
| ADA                | 4.91 | 5.61 | 4.50 |
| IFNL1              | 4.91 | 5.60 | 4.44 |
| SNORD116-14        | 4.90 | 5.34 | 3.95 |
| ASB6               | 4.90 | 5.19 | 4.46 |
| GPRC5C             | 4.90 | 5.43 | 4.36 |
| LMAN1L             | 4.90 | 5.29 | 4.40 |
| OTTHUMG00000159737 | 4.90 | 5.52 | 4.27 |
| IGBP1              | 4.90 | 5.18 | 4.54 |
| OTTHUMG00000015922 | 4.90 | 5.30 | 4.64 |
| LOC730183          | 4.90 | 5.66 | 4.39 |
| FOXA3              | 4.90 | 5.13 | 4.53 |
| SCAMP4             | 4.90 | 5.33 | 4.42 |
| PRR7-AS1           | 4.90 | 5.42 | 4.52 |
| NUAK1              | 4.90 | 5.52 | 3.89 |
| DDX3Y              | 4.90 | 6.15 | 2.95 |
| PRSS36             | 4.90 | 5.33 | 4.53 |
| GPR12              | 4.90 | 5.38 | 4.56 |
| C22orf23           | 4.90 | 5.21 | 4.58 |



|                    |      |      |      |
|--------------------|------|------|------|
| LOC340239          | 4.90 | 5.53 | 4.40 |
| EAF2               | 4.90 | 5.26 | 4.44 |
| STX3               | 4.90 | 5.26 | 4.35 |
| LINC00702          | 4.90 | 6.37 | 3.71 |
| CCDC40             | 4.90 | 5.15 | 4.59 |
| LOC90834           | 4.90 | 5.18 | 4.72 |
| LOC100506804       | 4.90 | 5.34 | 4.59 |
| C3orf18            | 4.90 | 5.20 | 4.70 |
| MCF2L-AS1          | 4.90 | 5.44 | 4.36 |
| SEPT1              | 4.90 | 5.05 | 4.74 |
| SLC4A11            | 4.90 | 5.44 | 4.55 |
| UCKL1-AS1          | 4.90 | 5.34 | 4.49 |
| KRT19              | 4.90 | 5.43 | 4.48 |
| BEAN1              | 4.90 | 5.30 | 4.32 |
| ASCC2              | 4.90 | 5.31 | 4.64 |
| TMEM171            | 4.90 | 5.16 | 4.46 |
| LOC100996549       | 4.90 | 5.40 | 4.57 |
| MIPEP              | 4.90 | 5.55 | 4.25 |
| FZD7               | 4.90 | 5.39 | 4.59 |
| TMEM115            | 4.90 | 5.17 | 4.38 |
| LHFPL5             | 4.90 | 5.00 | 4.68 |
| PRY                | 4.90 | 5.46 | 4.50 |
| OTTHUMG00000165882 | 4.90 | 5.55 | 4.16 |
| BATF               | 4.90 | 5.13 | 4.54 |
| ALOXE3             | 4.90 | 5.46 | 4.47 |
| AFAP1              | 4.90 | 5.17 | 4.68 |
| OTTHUMG00000166389 | 4.90 | 5.54 | 4.31 |
| SLC38A5            | 4.90 | 5.80 | 3.75 |
| PTX4               | 4.90 | 5.48 | 4.57 |
| ZFAND4             | 4.90 | 5.54 | 4.34 |
| OTTHUMG00000031808 | 4.90 | 5.35 | 4.38 |
| SGSM1              | 4.90 | 5.24 | 4.56 |
| SLC37A4            | 4.90 | 5.33 | 4.64 |
| PI3                | 4.90 | 5.26 | 4.67 |
| OTTHUMG00000013297 | 4.90 | 5.44 | 4.43 |
| C15orf37           | 4.90 | 5.41 | 4.57 |
| DEFB4B             | 4.90 | 5.60 | 3.69 |
| NNAT               | 4.90 | 5.40 | 4.07 |
| LOC100130027       | 4.90 | 5.29 | 4.39 |
| LOC100128881       | 4.90 | 5.11 | 4.60 |
| FAM3A              | 4.90 | 5.18 | 4.58 |
| GPR123             | 4.90 | 5.16 | 4.76 |
| LGR6               | 4.90 | 5.37 | 4.29 |
| ZNF496             | 4.90 | 5.01 | 4.74 |
| CDKN2C             | 4.90 | 5.84 | 4.17 |
| CASP6              | 4.90 | 5.19 | 4.15 |
| PPP1R1B            | 4.90 | 5.18 | 4.48 |
| SLC2A1-AS1         | 4.90 | 5.17 | 4.56 |
| ALKBH5             | 4.90 | 5.35 | 4.38 |

|                    |      |      |      |
|--------------------|------|------|------|
| UGDH-AS1           | 4.90 | 5.36 | 4.46 |
| NUDT2              | 4.90 | 5.16 | 4.47 |
| ANO7               | 4.90 | 5.05 | 4.65 |
| OTTHUMG00000019257 | 4.90 | 5.54 | 4.50 |
| DMD-AS1            | 4.90 | 5.50 | 4.23 |
| LOC100287728       | 4.90 | 5.54 | 4.30 |
| ST3GAL6            | 4.90 | 5.11 | 4.71 |
| KIFC3              | 4.90 | 5.13 | 4.63 |
| PRR9               | 4.90 | 5.45 | 4.46 |
| STAMPB             | 4.90 | 5.52 | 4.68 |
| NAT8               | 4.90 | 5.33 | 4.19 |
| ASB9               | 4.90 | 5.69 | 4.47 |
| OR6K2              | 4.90 | 5.60 | 3.74 |
| BRPF1              | 4.90 | 5.14 | 4.65 |
| STK11              | 4.90 | 5.38 | 4.54 |
| TNFRSF10B          | 4.90 | 5.12 | 4.53 |
| REPIN1             | 4.90 | 5.13 | 4.41 |
| FAM138A            | 4.90 | 5.63 | 4.28 |
| KLF17              | 4.90 | 5.20 | 4.74 |
| CD177              | 4.90 | 5.17 | 4.73 |
| LCN6               | 4.90 | 5.18 | 4.70 |
| BMP3               | 4.90 | 5.62 | 4.33 |
| SRRM3              | 4.89 | 5.21 | 4.59 |
| OTTHUMG00000168051 | 4.89 | 5.21 | 4.51 |
| SLC2A11            | 4.89 | 5.25 | 4.41 |
| MIR4659B           | 4.89 | 5.61 | 3.41 |
| TESC               | 4.89 | 5.23 | 4.48 |
| STRIP2             | 4.89 | 5.61 | 4.21 |
| MCOLN3             | 4.89 | 5.69 | 4.14 |
| DHCR24             | 4.89 | 5.36 | 4.18 |
| TMEM119            | 4.89 | 5.31 | 4.30 |
| LOC100506319       | 4.89 | 5.63 | 4.48 |
| IGLV2-18           | 4.89 | 5.82 | 4.30 |
| DYRK1B             | 4.89 | 5.21 | 4.55 |
| LOC100128343       | 4.89 | 5.37 | 4.72 |
| VWC2               | 4.89 | 5.39 | 4.55 |
| GNPDA1             | 4.89 | 5.31 | 4.58 |
| OTTHUMG00000086699 | 4.89 | 5.74 | 4.41 |
| SNORA65            | 4.89 | 5.24 | 4.29 |
| MLYCD              | 4.89 | 5.31 | 4.49 |
| KLK9               | 4.89 | 5.27 | 4.56 |
| TGM2               | 4.89 | 5.49 | 4.46 |
| LINC00516          | 4.89 | 5.31 | 4.60 |
| KCNK5              | 4.89 | 5.47 | 4.27 |
| NR1H3              | 4.89 | 5.44 | 4.54 |
| LOC100287042       | 4.89 | 5.32 | 4.29 |
| OPRL1              | 4.89 | 5.21 | 4.67 |
| LOC101060008       | 4.89 | 6.00 | 4.03 |
| LACC1              | 4.89 | 5.44 | 4.55 |

|              |      |      |      |
|--------------|------|------|------|
| PROZ         | 4.89 | 5.16 | 4.61 |
| FLJ38723     | 4.89 | 5.51 | 4.47 |
| SUB1         | 4.89 | 5.03 | 4.62 |
| NAPSA        | 4.89 | 5.62 | 4.20 |
| CPEB1        | 4.89 | 5.39 | 4.27 |
| KHDRBS3      | 4.89 | 5.44 | 4.44 |
| C1QL4        | 4.89 | 5.24 | 4.55 |
| SPATA6L      | 4.89 | 5.66 | 4.44 |
| HNRNPA1P33   | 4.89 | 6.16 | 4.03 |
| SELK         | 4.89 | 5.12 | 4.53 |
| SLC13A4      | 4.89 | 5.14 | 4.56 |
| OR8S1        | 4.89 | 5.31 | 4.58 |
| CALML4       | 4.89 | 5.34 | 4.20 |
| ZFAT         | 4.89 | 5.24 | 4.47 |
| CYP2G1P      | 4.89 | 5.34 | 4.64 |
| GATA6        | 4.89 | 5.28 | 4.44 |
| BTNL10       | 4.89 | 5.16 | 4.37 |
| SLC22A11     | 4.89 | 5.36 | 4.48 |
| C1orf122     | 4.89 | 5.35 | 4.32 |
| FAM90A20P    | 4.89 | 5.28 | 4.52 |
| TRIM16       | 4.89 | 5.44 | 4.39 |
| NOA1         | 4.89 | 5.61 | 4.36 |
| CAMK2A       | 4.89 | 5.27 | 4.45 |
| FAR2         | 4.89 | 5.32 | 4.54 |
| TSTD1        | 4.89 | 5.55 | 4.21 |
| RCOR2        | 4.89 | 5.42 | 4.56 |
| PRR11        | 4.89 | 5.77 | 3.89 |
| NOS2P3       | 4.89 | 5.33 | 4.62 |
| ARMC2        | 4.89 | 5.40 | 4.34 |
| GPR180       | 4.89 | 5.45 | 4.49 |
| KLHL17       | 4.89 | 5.14 | 4.57 |
| KLHDC9       | 4.89 | 5.41 | 4.39 |
| ADCY10P1     | 4.89 | 5.24 | 4.50 |
| LOC440040    | 4.89 | 5.77 | 4.25 |
| KRT16        | 4.89 | 5.24 | 4.46 |
| ZBTB49       | 4.89 | 5.15 | 4.45 |
| SLC35D3      | 4.89 | 5.28 | 4.37 |
| OTOP1        | 4.89 | 5.22 | 4.68 |
| KCNN1        | 4.89 | 5.35 | 4.42 |
| CELSR3       | 4.89 | 5.24 | 4.40 |
| SHC4         | 4.89 | 5.33 | 4.48 |
| PDCL         | 4.89 | 5.31 | 4.34 |
| ZBED4        | 4.89 | 5.26 | 4.53 |
| ZNF823       | 4.89 | 5.81 | 3.23 |
| FAM81A       | 4.89 | 5.24 | 4.40 |
| LOC100128310 | 4.89 | 5.66 | 4.31 |
| MMEL1        | 4.89 | 5.29 | 4.45 |
| RPS6KL1      | 4.89 | 5.40 | 4.04 |
| CDHR1        | 4.89 | 5.35 | 4.64 |

|                    |      |      |      |
|--------------------|------|------|------|
| ST6GALNAC2         | 4.89 | 5.30 | 4.35 |
| LINC00263          | 4.89 | 6.01 | 4.31 |
| POU2F3             | 4.89 | 5.28 | 4.58 |
| OTTHUMG00000161960 | 4.89 | 5.09 | 4.60 |
| ZNF491             | 4.89 | 5.49 | 4.30 |
| FASTKD2            | 4.89 | 5.30 | 4.54 |
| ARF5               | 4.89 | 5.42 | 4.30 |
| ASPM               | 4.89 | 6.01 | 3.61 |
| GALNT9             | 4.89 | 5.54 | 4.53 |
| GSKIP              | 4.89 | 5.18 | 4.46 |
| SLC6A7             | 4.88 | 5.20 | 4.52 |
| OTTHUMG00000172914 | 4.88 | 5.29 | 4.59 |
| EARS2              | 4.88 | 5.17 | 4.67 |
| WDR3               | 4.88 | 5.37 | 4.31 |
| TMEM222            | 4.88 | 5.37 | 4.49 |
| ZSCAN10            | 4.88 | 5.39 | 4.53 |
| TTI2               | 4.88 | 5.35 | 4.63 |
| DNM3               | 4.88 | 5.25 | 4.13 |
| VTI1A              | 4.88 | 5.20 | 4.38 |
| POU3F3             | 4.88 | 5.15 | 4.49 |
| LOC100507024       | 4.88 | 5.27 | 4.54 |
| TUSC2              | 4.88 | 5.19 | 4.42 |
| MS4A14             | 4.88 | 5.87 | 4.36 |
| NT5C               | 4.88 | 5.48 | 4.42 |
| NPAP1              | 4.88 | 5.27 | 4.29 |
| TIFA               | 4.88 | 5.31 | 3.94 |
| BPIFA2             | 4.88 | 5.27 | 4.50 |
| OTTHUMG00000151400 | 4.88 | 5.25 | 4.37 |
| PTGES2             | 4.88 | 5.20 | 4.59 |
| KCNA1              | 4.88 | 5.49 | 4.29 |
| OR56A3             | 4.88 | 5.75 | 4.21 |
| B3GNT5             | 4.88 | 5.07 | 4.54 |
| TMEM120B           | 4.88 | 5.41 | 4.47 |
| HAUS6              | 4.88 | 5.56 | 4.55 |
| ABCC5-AS1          | 4.88 | 5.51 | 4.26 |
| SIX4               | 4.88 | 5.35 | 4.34 |
| XYLB               | 4.88 | 5.30 | 4.40 |
| NFKBIL1            | 4.88 | 5.36 | 4.64 |
| TMEM5              | 4.88 | 5.19 | 4.50 |
| KRTAP9-1           | 4.88 | 5.35 | 4.45 |
| STAG3L4            | 4.88 | 5.33 | 4.28 |
| ARSA               | 4.88 | 5.55 | 4.15 |
| LFNG               | 4.88 | 5.29 | 4.56 |
| GPM6B              | 4.88 | 5.42 | 4.52 |
| ZNF275             | 4.88 | 5.24 | 4.53 |
| ERN2               | 4.88 | 5.34 | 4.64 |
| CMTM6              | 4.88 | 5.47 | 3.78 |
| OTTHUMG00000164708 | 4.88 | 5.37 | 4.27 |
| BIN3               | 4.88 | 5.26 | 4.47 |

|                           |      |      |      |
|---------------------------|------|------|------|
| <i>IQCK</i>               | 4.88 | 5.70 | 4.10 |
| <i>HID1</i>               | 4.88 | 5.38 | 4.29 |
| <i>LRRC20</i>             | 4.88 | 5.25 | 4.54 |
| <i>RIIAD1</i>             | 4.88 | 5.37 | 4.46 |
| <i>LRP5L</i>              | 4.88 | 5.25 | 4.54 |
| <i>ZNF879</i>             | 4.88 | 5.30 | 4.18 |
| <i>PAR6G-AS1</i>          | 4.88 | 5.46 | 4.28 |
| <i>CARD6</i>              | 4.88 | 5.44 | 4.55 |
| <i>LHFPL4</i>             | 4.88 | 5.24 | 4.45 |
| <i>ADRA1D</i>             | 4.88 | 5.41 | 4.61 |
| <i>OTTHUMG00000037527</i> | 4.88 | 5.26 | 4.54 |
| <i>CDCA8</i>              | 4.88 | 5.28 | 4.52 |
| <i>BMP8B</i>              | 4.88 | 5.47 | 4.10 |
| <i>SELP</i>               | 4.88 | 5.98 | 3.38 |
| <i>EYA2</i>               | 4.88 | 5.23 | 4.57 |
| <i>NXPE3</i>              | 4.88 | 5.36 | 4.04 |
| <i>MIR4330</i>            | 4.88 | 5.71 | 3.96 |
| <i>C22orf39</i>           | 4.88 | 5.08 | 4.51 |
| <i>ALAD</i>               | 4.88 | 5.15 | 4.56 |
| <i>SOX15</i>              | 4.88 | 5.07 | 4.60 |
| <i>DNAJC27</i>            | 4.88 | 5.08 | 4.51 |
| <i>ATP6V1B1</i>           | 4.88 | 5.22 | 4.53 |
| <i>LOC100128198</i>       | 4.88 | 5.11 | 4.61 |
| <i>ZNF775</i>             | 4.88 | 5.19 | 4.41 |
| <i>OTTHUMG00000155735</i> | 4.88 | 5.34 | 4.59 |
| <i>ANKRD54</i>            | 4.88 | 5.54 | 4.61 |
| <i>FAM73B</i>             | 4.88 | 5.52 | 4.47 |
| <i>CAMK2B</i>             | 4.88 | 5.08 | 4.63 |
| <i>COL22A1</i>            | 4.88 | 5.28 | 4.56 |
| <i>ZNF2</i>               | 4.88 | 5.32 | 4.49 |
| <i>LOC100130430</i>       | 4.88 | 5.43 | 4.63 |
| <i>FAM58BP</i>            | 4.88 | 5.50 | 4.48 |
| <i>PI4K2A</i>             | 4.88 | 5.41 | 3.84 |
| <i>KRT36</i>              | 4.88 | 5.17 | 4.56 |
| <i>SMAD5-AS1</i>          | 4.88 | 5.29 | 4.55 |
| <i>FAH</i>                | 4.88 | 5.47 | 4.37 |
| <i>ALG6</i>               | 4.88 | 5.32 | 4.49 |
| <i>FAM177B</i>            | 4.88 | 5.50 | 4.56 |
| <i>ZNF511</i>             | 4.88 | 5.24 | 4.27 |
| <i>EBF2</i>               | 4.87 | 5.67 | 3.96 |
| <i>OTTHUMG00000038015</i> | 4.87 | 5.06 | 4.48 |
| <i>XAGE1A</i>             | 4.87 | 5.30 | 4.49 |
| <i>FAM171A2</i>           | 4.87 | 5.48 | 4.47 |
| <i>PSIMCT-1</i>           | 4.87 | 5.32 | 4.38 |
| <i>GPD2</i>               | 4.87 | 5.17 | 4.39 |
| <i>ARHGAP33</i>           | 4.87 | 5.44 | 4.41 |
| <i>CORO6</i>              | 4.87 | 5.21 | 4.44 |
| <i>PAQR3</i>              | 4.87 | 5.50 | 4.20 |
| <i>F10</i>                | 4.87 | 5.61 | 4.17 |

|                    |      |      |      |
|--------------------|------|------|------|
| GGTA1P             | 4.87 | 5.70 | 3.83 |
| MEPE               | 4.87 | 6.75 | 3.50 |
| LOC642846          | 4.87 | 5.21 | 4.39 |
| OR2G6              | 4.87 | 5.37 | 4.45 |
| GPR20              | 4.87 | 5.33 | 4.44 |
| PPP2R4             | 4.87 | 5.26 | 4.40 |
| CPS1               | 4.87 | 5.15 | 4.61 |
| OTTHUMG00000161256 | 4.87 | 5.58 | 4.46 |
| SLC25A20           | 4.87 | 5.30 | 4.50 |
| LINC00607          | 4.87 | 4.98 | 4.68 |
| SYCN               | 4.87 | 5.29 | 4.56 |
| GSTA7P             | 4.87 | 5.45 | 4.26 |
| OTTHUMG00000161522 | 4.87 | 5.23 | 4.47 |
| LOC100506358       | 4.87 | 5.16 | 4.34 |
| POLE               | 4.87 | 5.13 | 4.61 |
| OCIAD1-AS1         | 4.87 | 5.55 | 4.19 |
| SMCR5              | 4.87 | 5.25 | 4.20 |
| HIST2H3D           | 4.87 | 5.12 | 4.39 |
| ZFP30              | 4.87 | 5.20 | 4.47 |
| LEMD2              | 4.87 | 5.22 | 4.47 |
| CCDC18             | 4.87 | 5.56 | 4.10 |
| ARHGEF16           | 4.87 | 5.12 | 4.53 |
| SHANK3             | 4.87 | 5.57 | 4.23 |
| HRH2               | 4.87 | 5.21 | 4.32 |
| ATP2B2             | 4.87 | 5.45 | 4.12 |
| OTTHUMG00000162405 | 4.87 | 5.40 | 4.42 |
| NTPCR              | 4.87 | 5.35 | 4.41 |
| STARD13            | 4.87 | 5.31 | 4.44 |
| SH3BP4             | 4.87 | 5.18 | 4.63 |
| ARID3C             | 4.87 | 5.38 | 4.18 |
| HOXA2              | 4.87 | 5.30 | 4.13 |
| HDDC3              | 4.87 | 5.25 | 4.46 |
| CES3               | 4.87 | 5.09 | 4.68 |
| CCDC121            | 4.87 | 5.04 | 4.66 |
| LHX1               | 4.87 | 5.31 | 4.57 |
| LOC146513          | 4.87 | 5.53 | 4.29 |
| IL17RB             | 4.87 | 5.63 | 3.98 |
| BOLA3-AS1          | 4.87 | 5.24 | 4.23 |
| AGL                | 4.87 | 5.33 | 4.24 |
| MANEAL             | 4.87 | 5.29 | 4.49 |
| LOC652276          | 4.87 | 5.14 | 4.60 |
| LOC440461          | 4.87 | 5.32 | 4.24 |
| LOC728819          | 4.87 | 5.26 | 4.14 |
| NAALADL2           | 4.87 | 5.29 | 4.32 |
| PYCRL              | 4.87 | 5.37 | 4.48 |
| CYP2R1             | 4.87 | 5.60 | 4.49 |
| TRIM6-TRIM34       | 4.87 | 5.18 | 4.63 |
| LOC100132147       | 4.87 | 5.39 | 4.49 |
| LOC100505664       | 4.87 | 5.15 | 4.59 |

|                     |      |      |      |
|---------------------|------|------|------|
| FRA10AC1            | 4.87 | 5.11 | 4.24 |
| ASCL5               | 4.87 | 5.42 | 4.46 |
| CPNE9               | 4.87 | 5.35 | 4.60 |
| CDH22               | 4.87 | 5.44 | 4.42 |
| NXNL1               | 4.87 | 5.29 | 4.48 |
| STRA6               | 4.87 | 5.10 | 4.65 |
| SLC30A3             | 4.87 | 4.99 | 4.73 |
| CCL16               | 4.87 | 5.62 | 4.37 |
| FMO5                | 4.87 | 5.02 | 4.56 |
| NOXO1               | 4.87 | 5.34 | 4.40 |
| UNC5C               | 4.86 | 5.48 | 4.25 |
| EPN3                | 4.86 | 5.15 | 4.50 |
| SFTPA2              | 4.86 | 5.16 | 4.45 |
| OTTHUMG00000017366  | 4.86 | 5.31 | 4.42 |
| KRT18               | 4.86 | 5.26 | 4.30 |
| DNAJC17             | 4.86 | 5.02 | 4.64 |
| TNFAIP3             | 4.86 | 5.12 | 4.60 |
| CKM                 | 4.86 | 5.17 | 4.70 |
| RAPSN               | 4.86 | 5.24 | 4.25 |
| P2RX3               | 4.86 | 5.14 | 4.62 |
| GRIN3B              | 4.86 | 5.08 | 4.56 |
| NCAM1-AS1           | 4.86 | 5.21 | 4.51 |
| GPR68               | 4.86 | 5.32 | 4.54 |
| SH3BP2              | 4.86 | 5.16 | 4.75 |
| GAB2                | 4.86 | 5.24 | 4.51 |
| IGLV3-27            | 4.86 | 5.46 | 4.04 |
| FST                 | 4.86 | 5.33 | 4.43 |
| HAAO                | 4.86 | 5.20 | 4.11 |
| ACADL               | 4.86 | 5.82 | 4.14 |
| C16orf86            | 4.86 | 5.38 | 4.50 |
| LOC100506100        | 4.86 | 5.18 | 4.56 |
| IFIH1               | 4.86 | 5.75 | 4.29 |
| FLAD1               | 4.86 | 5.16 | 4.63 |
| NLN                 | 4.86 | 5.22 | 4.48 |
| FBXW7               | 4.86 | 5.19 | 4.38 |
| CA3                 | 4.86 | 5.43 | 4.46 |
| CCDC116             | 4.86 | 5.16 | 4.61 |
| PITX1               | 4.86 | 5.06 | 4.70 |
| OTTHUMG000000183534 | 4.86 | 5.46 | 4.21 |
| KRT78               | 4.86 | 5.43 | 4.24 |
| AP5M1               | 4.86 | 5.18 | 4.49 |
| DBH                 | 4.86 | 5.30 | 4.47 |
| LOC728485           | 4.86 | 5.34 | 4.51 |
| PLD2                | 4.86 | 5.44 | 4.51 |
| E2F1                | 4.86 | 5.09 | 4.40 |
| SKAP2               | 4.86 | 5.26 | 4.55 |
| NTM-IT3             | 4.86 | 5.27 | 4.18 |
| RPUSD4              | 4.86 | 5.27 | 4.50 |
| SRC                 | 4.86 | 5.32 | 4.33 |

|                    |      |      |      |
|--------------------|------|------|------|
| MLANA              | 4.86 | 5.27 | 4.38 |
| EDNRB              | 4.86 | 5.32 | 4.36 |
| CCM2               | 4.86 | 5.14 | 4.36 |
| CCDC170            | 4.86 | 5.29 | 4.52 |
| ROR1               | 4.86 | 5.89 | 4.13 |
| PPP1R3B            | 4.86 | 5.20 | 4.25 |
| SLC9A5             | 4.86 | 5.12 | 4.60 |
| SEMA6C             | 4.86 | 5.18 | 4.49 |
| C3AR1              | 4.86 | 6.01 | 3.50 |
| PYGO2              | 4.86 | 5.24 | 3.82 |
| GLB1L2             | 4.86 | 5.58 | 4.40 |
| HYDIN              | 4.86 | 5.11 | 4.38 |
| ZEB2-AS1           | 4.86 | 5.22 | 4.18 |
| SYPL2              | 4.86 | 5.21 | 4.36 |
| KIAA1009           | 4.86 | 5.28 | 4.07 |
| KRTAP5-9           | 4.86 | 5.81 | 4.04 |
| FAM98B             | 4.86 | 5.26 | 4.49 |
| CBX6               | 4.86 | 5.22 | 4.29 |
| ZEB1-AS1           | 4.86 | 5.27 | 4.34 |
| OTTHUMG00000160309 | 4.86 | 5.29 | 4.34 |
| TRMT44             | 4.86 | 5.18 | 4.50 |
| GADL1              | 4.86 | 5.10 | 4.63 |
| P4HTM              | 4.86 | 5.20 | 4.46 |
| OTTHUMG00000067216 | 4.86 | 5.63 | 4.30 |
| OTTHUMG00000164253 | 4.86 | 5.44 | 4.15 |
| MYBPC2             | 4.86 | 5.24 | 4.49 |
| HOXA13             | 4.86 | 5.30 | 4.60 |
| PIANP              | 4.86 | 5.20 | 4.44 |
| NANP               | 4.86 | 5.14 | 4.55 |
| SNORD113-1         | 4.86 | 6.76 | 3.04 |
| TRPV3              | 4.86 | 5.17 | 4.63 |
| CACFD1             | 4.86 | 5.33 | 4.36 |
| CECR5              | 4.86 | 5.22 | 4.37 |
| CAMK2G             | 4.86 | 5.47 | 4.43 |
| TOB1-AS1           | 4.86 | 5.19 | 4.56 |
| MICU2              | 4.86 | 5.40 | 3.87 |
| FABP6              | 4.86 | 5.25 | 4.25 |
| POM121L10P         | 4.86 | 5.51 | 4.33 |
| OTTHUMG00000162131 | 4.86 | 5.63 | 4.34 |
| TSPEAR-AS1         | 4.86 | 5.09 | 4.67 |
| CSNK2A3            | 4.85 | 6.06 | 3.91 |
| ANKRD46            | 4.85 | 5.11 | 4.63 |
| LINC00696          | 4.85 | 5.41 | 4.53 |
| ENTPD3             | 4.85 | 5.09 | 4.55 |
| PCSK5              | 4.85 | 5.07 | 4.57 |
| UCN2               | 4.85 | 5.24 | 4.09 |
| TRDV3              | 4.85 | 5.29 | 4.33 |
| CPSF4              | 4.85 | 5.31 | 4.55 |
| ZNF613             | 4.85 | 5.38 | 4.40 |



|                    |      |      |      |
|--------------------|------|------|------|
| LINC00597          | 4.85 | 5.61 | 4.13 |
| CHRNA10            | 4.85 | 5.43 | 4.28 |
| MFSD2A             | 4.85 | 5.50 | 4.21 |
| PLGLA              | 4.85 | 5.25 | 4.30 |
| OTTHUMG00000032718 | 4.85 | 5.36 | 4.43 |
| NR4A2              | 4.85 | 5.48 | 4.31 |
| ANGEL1             | 4.85 | 5.30 | 4.49 |
| IKZF2              | 4.85 | 5.28 | 4.54 |
| INS-IGF2           | 4.85 | 5.27 | 4.40 |
| OC90               | 4.85 | 5.55 | 4.36 |
| OTTHUMG00000160584 | 4.85 | 5.32 | 4.56 |
| SPATA12            | 4.85 | 5.27 | 4.47 |
| USP51              | 4.85 | 5.31 | 4.46 |
| TMEM209            | 4.85 | 5.20 | 4.54 |
| ADO                | 4.85 | 5.39 | 4.30 |
| MIR149             | 4.85 | 5.51 | 4.37 |
| VIL1               | 4.85 | 5.15 | 4.48 |
| OTTHUMG00000161724 | 4.85 | 5.29 | 4.38 |
| OTTHUMG00000151360 | 4.85 | 5.32 | 4.30 |
| C17orf70           | 4.85 | 5.09 | 4.45 |
| OR2G3              | 4.85 | 5.40 | 3.84 |
| OLFML3             | 4.85 | 5.65 | 4.23 |
| SLC43A2            | 4.85 | 5.43 | 4.43 |
| ASPHD2             | 4.85 | 5.19 | 4.64 |
| PLK2               | 4.85 | 5.74 | 3.78 |
| EPHA1              | 4.85 | 5.01 | 4.60 |
| PXMP4              | 4.85 | 5.32 | 4.33 |
| MTBP               | 4.85 | 5.20 | 4.30 |
| C1orf220           | 4.85 | 5.13 | 4.63 |
| GSAP               | 4.85 | 5.03 | 4.59 |
| OTTHUMG00000168002 | 4.85 | 5.17 | 4.65 |
| OTTHUMG00000031689 | 4.85 | 5.43 | 4.11 |
| NR2F2              | 4.85 | 6.55 | 3.55 |
| ADCY3              | 4.85 | 5.30 | 4.45 |
| C20orf27           | 4.85 | 5.31 | 4.44 |
| WNK2               | 4.85 | 5.36 | 4.26 |
| RAPGEF4            | 4.85 | 5.13 | 4.51 |
| MAR1               | 4.85 | 5.36 | 4.34 |
| LHX3               | 4.85 | 5.25 | 4.19 |
| ADORA2A            | 4.85 | 5.08 | 4.65 |
| SMPD2              | 4.85 | 5.34 | 4.35 |
| PRPS1L1            | 4.85 | 5.29 | 4.37 |
| LOC100509780       | 4.85 | 5.35 | 4.41 |
| RNA5SP218          | 4.85 | 5.44 | 4.00 |
| PAX8               | 4.85 | 5.44 | 4.59 |
| PFN2               | 4.85 | 5.37 | 4.37 |
| RELB               | 4.85 | 5.30 | 4.43 |
| MECOM              | 4.85 | 5.25 | 4.28 |
| OTTHUMG00000161604 | 4.85 | 5.24 | 4.42 |

|                    |      |      |      |
|--------------------|------|------|------|
| TTPAL              | 4.85 | 5.26 | 4.21 |
| RLN3               | 4.85 | 5.60 | 4.42 |
| GLTSCR1            | 4.85 | 5.19 | 4.28 |
| ALPP               | 4.85 | 5.44 | 4.34 |
| UBAC1              | 4.85 | 5.21 | 4.15 |
| LINC00592          | 4.85 | 5.42 | 4.44 |
| AP3M2              | 4.85 | 5.31 | 4.49 |
| PSD2               | 4.85 | 5.30 | 4.49 |
| IGSF9              | 4.85 | 5.24 | 4.64 |
| TRH                | 4.85 | 5.43 | 4.47 |
| STEAP3-AS1         | 4.85 | 5.51 | 4.47 |
| MIR3148            | 4.85 | 6.06 | 4.36 |
| OTTHUMG00000018038 | 4.85 | 5.18 | 4.58 |
| DGKK               | 4.85 | 5.34 | 4.16 |
| LINC00905          | 4.85 | 5.32 | 4.48 |
| ALOX12P2           | 4.85 | 5.37 | 4.36 |
| F2                 | 4.85 | 5.22 | 4.55 |
| LRRC6              | 4.85 | 5.15 | 4.52 |
| MOXD1              | 4.85 | 5.45 | 4.35 |
| OTTHUMG00000020419 | 4.85 | 5.44 | 4.40 |
| PABPC1L            | 4.85 | 5.27 | 4.26 |
| PEX26              | 4.85 | 5.23 | 4.47 |
| TLX1NB             | 4.84 | 5.33 | 4.18 |
| KEAP1              | 4.84 | 5.55 | 4.13 |
| SLFN12             | 4.84 | 5.37 | 4.51 |
| CTRB1              | 4.84 | 5.40 | 4.34 |
| LOC100505923       | 4.84 | 5.06 | 4.55 |
| PRRG1              | 4.84 | 5.10 | 4.36 |
| LOC731424          | 4.84 | 5.05 | 4.63 |
| STK17A             | 4.84 | 5.34 | 4.42 |
| ITGA3              | 4.84 | 5.09 | 4.69 |
| C16orf92           | 4.84 | 5.34 | 4.59 |
| CDC42EP2           | 4.84 | 5.06 | 4.42 |
| OTTHUMG00000162458 | 4.84 | 5.65 | 4.43 |
| PLGRKT             | 4.84 | 5.19 | 4.51 |
| WRB                | 4.84 | 5.04 | 4.42 |
| NGFR               | 4.84 | 5.13 | 4.55 |
| DDC                | 4.84 | 5.10 | 4.59 |
| MAP3K13            | 4.84 | 5.19 | 4.52 |
| CHAF1B             | 4.84 | 5.32 | 4.52 |
| KCNC4              | 4.84 | 5.38 | 4.33 |
| ZNF727             | 4.84 | 5.23 | 4.26 |
| VPS51              | 4.84 | 5.32 | 4.34 |
| MIR4505            | 4.84 | 5.44 | 4.63 |
| CAV2               | 4.84 | 5.12 | 4.48 |
| OTTHUMG00000014661 | 4.84 | 5.37 | 4.37 |
| CSH1               | 4.84 | 5.50 | 4.16 |
| ODF3B              | 4.84 | 5.27 | 4.41 |
| TSC22D3            | 4.84 | 5.37 | 4.21 |

|                    |      |      |      |
|--------------------|------|------|------|
| PPAT               | 4.84 | 5.21 | 4.39 |
| TOB2P1             | 4.84 | 5.41 | 4.35 |
| CRYBB2P1           | 4.84 | 5.90 | 4.06 |
| TAS1R1             | 4.84 | 5.31 | 4.54 |
| WDR38              | 4.84 | 5.31 | 4.21 |
| PAX7               | 4.84 | 5.24 | 4.43 |
| ICAM5              | 4.84 | 5.12 | 4.56 |
| CHCHD4             | 4.84 | 5.27 | 4.59 |
| LINC00663          | 4.84 | 5.27 | 4.26 |
| RAE1               | 4.84 | 5.24 | 4.57 |
| MIR371B            | 4.84 | 5.66 | 3.99 |
| ATP6V0A2           | 4.84 | 5.54 | 3.84 |
| FAM64A             | 4.84 | 5.44 | 4.18 |
| SAG                | 4.84 | 5.51 | 4.57 |
| OR2A7              | 4.84 | 5.44 | 4.13 |
| POC1A              | 4.84 | 5.26 | 4.35 |
| OTTHUMG00000171691 | 4.84 | 5.63 | 4.37 |
| PGAM5              | 4.84 | 5.01 | 4.52 |
| TCF23              | 4.84 | 5.32 | 4.52 |
| KIAA1244           | 4.84 | 5.22 | 4.51 |
| KIRREL2            | 4.84 | 5.13 | 4.41 |
| PLEKHB1            | 4.84 | 5.59 | 4.52 |
| GGT7               | 4.84 | 5.15 | 4.57 |
| OTTHUMG00000163337 | 4.84 | 5.28 | 4.10 |
| HAGHL              | 4.84 | 5.12 | 4.61 |
| PNPO               | 4.84 | 5.10 | 4.38 |
| BNIP1              | 4.84 | 5.22 | 4.61 |
| PAFAH1B3           | 4.84 | 5.33 | 4.48 |
| ZNF485             | 4.84 | 5.34 | 4.38 |
| ANKMY1             | 4.84 | 5.26 | 4.51 |
| CMSS1              | 4.84 | 5.18 | 4.58 |
| ATG4C              | 4.84 | 5.36 | 4.58 |
| FXVD7              | 4.84 | 5.03 | 4.51 |
| CAMP               | 4.84 | 5.17 | 4.53 |
| GIT1               | 4.84 | 5.16 | 4.47 |
| GAS2L3             | 4.84 | 5.31 | 4.42 |
| RPP25              | 4.84 | 5.27 | 4.37 |
| LOC100129936       | 4.84 | 5.65 | 4.21 |
| FRMD8              | 4.84 | 5.29 | 4.10 |
| VWA7               | 4.84 | 5.04 | 4.45 |
| LOC148413          | 4.84 | 5.08 | 4.50 |
| HSD3BP4            | 4.84 | 5.43 | 4.31 |
| KIAA0101           | 4.84 | 5.13 | 4.43 |
| TJP2               | 4.84 | 5.22 | 4.51 |
| SFTA2              | 4.84 | 5.21 | 4.49 |
| OTTHUMG00000159990 | 4.84 | 5.19 | 4.57 |
| SUPT20HL1          | 4.84 | 5.53 | 4.33 |
| OTTHUMG00000015119 | 4.84 | 5.21 | 4.47 |
| RNA5SP91           | 4.84 | 5.51 | 4.09 |

|                    |      |      |      |
|--------------------|------|------|------|
| TPD52              | 4.84 | 5.25 | 4.45 |
| ARSJ               | 4.84 | 5.25 | 4.33 |
| VTCN1              | 4.84 | 5.42 | 4.40 |
| SCUBE2             | 4.84 | 5.20 | 4.47 |
| TOMM40L            | 4.84 | 5.12 | 4.30 |
| MIR597             | 4.84 | 5.39 | 3.90 |
| TGFA               | 4.84 | 5.03 | 4.34 |
| OR6W1P             | 4.84 | 5.40 | 4.55 |
| MICALL1            | 4.84 | 5.09 | 4.42 |
| BARX2              | 4.84 | 5.61 | 4.28 |
| NTSR1              | 4.84 | 5.10 | 4.57 |
| CEACAM3            | 4.84 | 5.45 | 4.50 |
| OTTHUMG00000166306 | 4.84 | 5.13 | 4.06 |
| OTTHUMG00000163804 | 4.84 | 5.15 | 4.55 |
| OTTHUMG00000015092 | 4.84 | 5.25 | 4.36 |
| CHN1               | 4.84 | 5.60 | 4.40 |
| OR5B21             | 4.84 | 5.40 | 4.34 |
| MEIS1              | 4.84 | 5.16 | 4.61 |
| TGM6               | 4.84 | 5.30 | 4.33 |
| DUOXA1             | 4.84 | 5.15 | 4.61 |
| MFSD4              | 4.84 | 5.08 | 4.46 |
| GAGE10             | 4.84 | 5.62 | 3.61 |
| MAR3               | 4.84 | 5.40 | 4.29 |
| LSM11              | 4.84 | 5.11 | 4.28 |
| GFI1B              | 4.83 | 5.49 | 4.31 |
| MIR212             | 4.83 | 5.27 | 4.28 |
| KRTAP20-2          | 4.83 | 5.23 | 4.49 |
| ZG16B              | 4.83 | 5.34 | 4.51 |
| SNORD99            | 4.83 | 5.93 | 2.93 |
| LOC100289455       | 4.83 | 5.29 | 4.36 |
| DIO3OS             | 4.83 | 5.14 | 4.49 |
| TOLLIP             | 4.83 | 5.31 | 4.35 |
| LOC729444          | 4.83 | 5.74 | 4.50 |
| OTTHUMG00000153335 | 4.83 | 5.16 | 4.47 |
| SCARA5             | 4.83 | 5.31 | 4.08 |
| SAE1               | 4.83 | 5.22 | 3.90 |
| ZNF625-ZNF20       | 4.83 | 5.13 | 4.47 |
| ARHGAP30           | 4.83 | 5.25 | 4.36 |
| P2RY14             | 4.83 | 5.54 | 4.41 |
| ZNF486             | 4.83 | 5.46 | 4.14 |
| OSBPL6             | 4.83 | 5.69 | 4.34 |
| TRAF2              | 4.83 | 5.23 | 4.46 |
| OTTHUMG00000018245 | 4.83 | 5.50 | 3.93 |
| PLA2G12B           | 4.83 | 5.11 | 4.68 |
| RNA5SP181          | 4.83 | 5.42 | 4.14 |
| CD19               | 4.83 | 5.14 | 4.48 |
| ALX3               | 4.83 | 5.26 | 4.45 |
| CRY1               | 4.83 | 5.69 | 4.27 |
| DPH6               | 4.83 | 5.32 | 4.33 |

|                    |      |      |      |
|--------------------|------|------|------|
| OR5L2              | 4.83 | 5.80 | 3.22 |
| PROC               | 4.83 | 5.03 | 4.38 |
| BACH2              | 4.83 | 5.27 | 4.39 |
| SERHL              | 4.83 | 5.63 | 4.26 |
| CACNG3             | 4.83 | 5.21 | 4.42 |
| LINC00673          | 4.83 | 5.11 | 4.56 |
| LOC728730          | 4.83 | 5.19 | 4.53 |
| POGLUT1            | 4.83 | 5.36 | 4.23 |
| RAET1E             | 4.83 | 5.24 | 4.58 |
| RNF151             | 4.83 | 5.23 | 4.27 |
| SIX3-AS1           | 4.83 | 5.13 | 4.59 |
| DOCK2              | 4.83 | 6.02 | 4.18 |
| OR2T10             | 4.83 | 5.37 | 4.62 |
| OTTHUMG00000155213 | 4.83 | 5.57 | 4.30 |
| MYL12B             | 4.83 | 5.17 | 4.56 |
| ZNF551             | 4.83 | 5.11 | 4.59 |
| VWA5B2             | 4.83 | 5.41 | 4.52 |
| MIR4429            | 4.83 | 5.60 | 4.05 |
| CKAP4              | 4.83 | 5.24 | 4.37 |
| LINC00334          | 4.83 | 5.23 | 4.45 |
| MIR766             | 4.83 | 5.40 | 4.22 |
| MRVI1              | 4.83 | 5.45 | 4.19 |
| CYP11B1            | 4.83 | 5.21 | 4.29 |
| PADI6              | 4.83 | 5.35 | 4.34 |
| PLCL2              | 4.83 | 5.22 | 4.41 |
| OTTHUMG00000154972 | 4.83 | 5.27 | 4.52 |
| APOBEC3G           | 4.83 | 5.29 | 4.27 |
| APOBR              | 4.83 | 5.35 | 4.36 |
| EXOC6              | 4.83 | 5.24 | 3.80 |
| OTTHUMG00000154037 | 4.83 | 5.29 | 4.16 |
| ZBTB12             | 4.83 | 5.08 | 4.54 |
| TBXAS1             | 4.83 | 5.16 | 4.38 |
| BLCAP              | 4.83 | 5.07 | 4.63 |
| C3orf35            | 4.83 | 5.36 | 4.49 |
| LOC100379224       | 4.83 | 5.01 | 4.43 |
| C17orf72           | 4.83 | 5.29 | 4.30 |
| WFS1               | 4.83 | 5.15 | 4.55 |
| RNF121             | 4.83 | 5.37 | 4.28 |
| DLGAP1             | 4.83 | 5.30 | 4.45 |
| LOC100129069       | 4.83 | 5.42 | 4.39 |
| NKPD1              | 4.83 | 5.19 | 4.61 |
| DES                | 4.83 | 5.17 | 4.49 |
| C3P1               | 4.83 | 5.17 | 4.60 |
| PDE6B              | 4.83 | 5.13 | 4.53 |
| LOC100996457       | 4.83 | 5.26 | 4.52 |
| C17orf98           | 4.83 | 5.22 | 4.34 |
| GNB1L              | 4.83 | 5.12 | 4.64 |
| HEYL               | 4.83 | 5.46 | 4.35 |
| KRT1               | 4.83 | 5.76 | 4.33 |

|                    |      |      |      |
|--------------------|------|------|------|
| LURAP1             | 4.83 | 5.12 | 4.57 |
| PMEL               | 4.83 | 5.10 | 4.44 |
| HNRNPA3            | 4.83 | 5.06 | 4.54 |
| LOC284014          | 4.83 | 5.37 | 4.43 |
| LOC728196          | 4.83 | 5.38 | 4.29 |
| SUOX               | 4.83 | 5.05 | 4.47 |
| E2F5               | 4.83 | 5.34 | 4.42 |
| LOC100506713       | 4.83 | 5.14 | 4.51 |
| SPATA5L1           | 4.83 | 4.92 | 4.54 |
| ABCC3              | 4.83 | 6.02 | 4.28 |
| HUNK               | 4.83 | 5.75 | 4.32 |
| OTTHUMG00000168064 | 4.83 | 5.84 | 4.24 |
| LOC257396          | 4.83 | 5.11 | 4.63 |
| ENPEP              | 4.83 | 5.74 | 3.95 |
| LY6D               | 4.83 | 5.16 | 4.54 |
| SDR42E1            | 4.83 | 5.15 | 4.56 |
| ZNF691             | 4.82 | 5.23 | 4.58 |
| OTTHUMG00000019004 | 4.82 | 5.37 | 4.49 |
| CD1D               | 4.82 | 5.31 | 4.56 |
| SYTL3              | 4.82 | 5.20 | 4.54 |
| CMBL               | 4.82 | 5.04 | 4.46 |
| LOC100130691       | 4.82 | 5.39 | 4.01 |
| HSPA14             | 4.82 | 5.30 | 3.96 |
| HLA-B              | 4.82 | 5.65 | 3.73 |
| ZNF821             | 4.82 | 5.14 | 4.59 |
| PIK3CG             | 4.82 | 5.24 | 4.40 |
| N6AMT1             | 4.82 | 5.08 | 4.41 |
| MAOA               | 4.82 | 5.61 | 4.38 |
| OTTHUMG00000167601 | 4.82 | 5.38 | 4.34 |
| PPP1R37            | 4.82 | 5.11 | 4.27 |
| EBLN2              | 4.82 | 5.30 | 4.49 |
| LRRC28             | 4.82 | 5.10 | 4.35 |
| ADCYAP1R1          | 4.82 | 5.32 | 4.57 |
| LONRF2             | 4.82 | 5.33 | 4.19 |
| OTTHUMG00000171913 | 4.82 | 5.40 | 4.50 |
| NOL6               | 4.82 | 5.06 | 4.50 |
| CLEC4A             | 4.82 | 5.60 | 3.89 |
| CENPO              | 4.82 | 5.10 | 4.47 |
| CCDC88C            | 4.82 | 5.14 | 4.34 |
| PRDM1              | 4.82 | 5.12 | 4.57 |
| LOC653712          | 4.82 | 5.08 | 4.58 |
| KCND3              | 4.82 | 5.47 | 4.26 |
| PIK3CB             | 4.82 | 5.19 | 4.45 |
| CSTF2              | 4.82 | 4.99 | 4.61 |
| C1QTNF3-AMACR      | 4.82 | 5.88 | 3.93 |
| BTN3A1             | 4.82 | 5.10 | 4.46 |
| OTTHUMG00000163395 | 4.82 | 5.61 | 3.61 |
| ALOX12             | 4.82 | 5.13 | 4.33 |
| OTTHUMG00000179326 | 4.82 | 5.15 | 4.19 |

|                    |      |      |      |
|--------------------|------|------|------|
| NEIL1              | 4.82 | 5.10 | 4.49 |
| TOP3B              | 4.82 | 5.10 | 4.56 |
| COL25A1            | 4.82 | 5.26 | 4.04 |
| GOT1               | 4.82 | 5.03 | 4.65 |
| TNKS2-AS1          | 4.82 | 5.10 | 4.50 |
| CLMN               | 4.82 | 5.12 | 4.43 |
| LOC729852          | 4.82 | 5.22 | 4.64 |
| CNKSR3             | 4.82 | 5.23 | 4.50 |
| ZNF365             | 4.82 | 5.27 | 4.44 |
| PSEN2              | 4.82 | 5.11 | 4.56 |
| ST3GAL1            | 4.82 | 5.19 | 4.51 |
| SFTPB              | 4.82 | 5.26 | 4.39 |
| FAM195A            | 4.82 | 5.39 | 4.30 |
| ACR                | 4.82 | 5.38 | 3.88 |
| SRSF10             | 4.82 | 5.36 | 4.13 |
| ZNRF2              | 4.82 | 5.21 | 4.53 |
| BNIP1              | 4.82 | 5.13 | 4.42 |
| DOC2A              | 4.82 | 5.16 | 4.48 |
| DPY19L1P1          | 4.82 | 5.35 | 4.36 |
| KCNE4              | 4.82 | 5.46 | 4.34 |
| TTYH2              | 4.82 | 5.15 | 4.45 |
| RABEPK             | 4.82 | 5.30 | 4.46 |
| GPR50              | 4.82 | 5.33 | 4.52 |
| OTTHUMG00000164199 | 4.82 | 5.08 | 4.31 |
| ADIPOR2            | 4.82 | 5.27 | 4.48 |
| SLC35C1            | 4.82 | 5.42 | 4.36 |
| RNF40              | 4.82 | 5.16 | 4.37 |
| KIAA1467           | 4.82 | 5.25 | 4.45 |
| ANXA2R             | 4.82 | 5.30 | 4.60 |
| OTTHUMG00000019202 | 4.82 | 5.32 | 4.20 |
| TCN2               | 4.82 | 5.26 | 4.37 |
| ZBED3              | 4.82 | 5.21 | 4.26 |
| MAPKBP1            | 4.82 | 5.06 | 4.64 |
| LINC00176          | 4.82 | 5.19 | 4.48 |
| AKR7A2             | 4.82 | 5.40 | 4.04 |
| RASSF2             | 4.82 | 5.21 | 4.48 |
| USP46              | 4.82 | 5.14 | 4.18 |
| TBX6               | 4.82 | 5.19 | 4.43 |
| PRR22              | 4.82 | 5.11 | 4.50 |
| RASGEF1C           | 4.82 | 5.16 | 4.34 |
| LOC100506105       | 4.82 | 5.15 | 4.24 |
| OTTHUMG00000153173 | 4.82 | 5.22 | 4.58 |
| ARL6               | 4.82 | 5.05 | 4.24 |
| LRRN1              | 4.82 | 5.63 | 4.22 |
| LOC100289580       | 4.82 | 5.29 | 4.44 |
| ARHGEF26           | 4.82 | 5.18 | 4.28 |
| ARNTL              | 4.82 | 5.40 | 3.95 |
| SERPIND1           | 4.82 | 5.06 | 4.28 |
| RNA5SP19           | 4.82 | 5.13 | 4.26 |

|                    |      |      |      |
|--------------------|------|------|------|
| COL4A2-AS2         | 4.82 | 5.34 | 4.44 |
| MIR3192            | 4.82 | 5.33 | 4.04 |
| SPOCD1             | 4.82 | 5.16 | 4.58 |
| ZNF136             | 4.82 | 5.18 | 4.36 |
| DENND1C            | 4.82 | 5.17 | 4.50 |
| WIF1               | 4.82 | 6.43 | 3.63 |
| SHISA9             | 4.82 | 5.13 | 4.20 |
| ATG4B              | 4.82 | 5.29 | 4.58 |
| MSX1               | 4.82 | 5.16 | 4.64 |
| TLR6               | 4.82 | 5.46 | 4.31 |
| FUT2               | 4.82 | 5.16 | 4.53 |
| PFKFB1             | 4.82 | 5.43 | 4.29 |
| TMEM117            | 4.82 | 5.16 | 4.38 |
| LOC100132831       | 4.82 | 5.65 | 4.35 |
| GMCL1              | 4.82 | 5.41 | 4.33 |
| OTTHUMG00000155027 | 4.82 | 5.32 | 4.45 |
| CATSPER2           | 4.82 | 5.27 | 4.39 |
| LOC101059921       | 4.82 | 5.56 | 4.26 |
| WHAMM              | 4.82 | 5.18 | 4.47 |
| ONECUT3            | 4.81 | 5.46 | 4.32 |
| NACC1              | 4.81 | 5.07 | 3.93 |
| FAM132B            | 4.81 | 5.04 | 4.40 |
| OTTHUMG00000041463 | 4.81 | 5.38 | 4.43 |
| CCDC115            | 4.81 | 5.14 | 4.53 |
| WDR81              | 4.81 | 5.06 | 4.45 |
| ADAMTS12           | 4.81 | 6.00 | 4.14 |
| ANAPC2             | 4.81 | 5.05 | 4.56 |
| SPRY3              | 4.81 | 5.11 | 4.42 |
| ARSK               | 4.81 | 5.42 | 4.21 |
| TP73-AS1           | 4.81 | 5.19 | 4.24 |
| PIGH               | 4.81 | 5.33 | 4.31 |
| OTTHUMG00000179638 | 4.81 | 5.38 | 4.13 |
| ARHGAP40           | 4.81 | 5.50 | 4.43 |
| RGS9               | 4.81 | 5.48 | 4.36 |
| CCZ1               | 4.81 | 5.51 | 4.32 |
| LOC339803          | 4.81 | 5.08 | 4.47 |
| MAP3K10            | 4.81 | 5.32 | 4.41 |
| UNC119B            | 4.81 | 5.34 | 4.47 |
| DIO2               | 4.81 | 5.36 | 4.20 |
| SKIDA1             | 4.81 | 5.10 | 4.55 |
| LOC390705          | 4.81 | 5.16 | 4.58 |
| SNORD75            | 4.81 | 5.71 | 3.95 |
| ZNF134             | 4.81 | 5.17 | 4.28 |
| KANSL1-AS1         | 4.81 | 5.79 | 4.28 |
| RBM20              | 4.81 | 5.12 | 4.53 |
| SYT13              | 4.81 | 5.76 | 4.27 |
| KIAA1549L          | 4.81 | 5.21 | 4.20 |
| OTTHUMG00000150002 | 4.81 | 5.13 | 4.50 |
| SNORD101           | 4.81 | 5.55 | 3.23 |



|                    |      |      |      |
|--------------------|------|------|------|
| HARBI1             | 4.81 | 5.11 | 4.50 |
| WWC1               | 4.81 | 5.23 | 4.37 |
| FANK1-AS1          | 4.81 | 5.48 | 4.31 |
| GINS3              | 4.81 | 5.44 | 4.53 |
| PCDH1              | 4.81 | 5.46 | 4.07 |
| ZNF155             | 4.81 | 5.08 | 4.60 |
| PACRGL             | 4.81 | 5.25 | 4.33 |
| LOC286178          | 4.81 | 5.03 | 4.64 |
| ZNF534             | 4.81 | 5.31 | 4.26 |
| DNMT3A             | 4.81 | 5.04 | 4.58 |
| ISG20              | 4.81 | 5.29 | 4.55 |
| MUL1               | 4.81 | 5.11 | 4.44 |
| LYPD3              | 4.81 | 5.23 | 4.32 |
| ZNF804B            | 4.81 | 5.26 | 4.43 |
| TIGD7              | 4.81 | 5.21 | 4.40 |
| MAR4               | 4.81 | 5.25 | 4.49 |
| MED11              | 4.81 | 5.56 | 4.20 |
| ZNF550             | 4.81 | 5.20 | 4.39 |
| ZNF394             | 4.81 | 5.13 | 4.21 |
| LOC100506321       | 4.81 | 5.15 | 4.21 |
| SATL1              | 4.81 | 5.19 | 4.47 |
| FRG2B              | 4.81 | 5.19 | 4.33 |
| OTTHUMG00000004419 | 4.81 | 5.10 | 4.58 |
| C2orf54            | 4.81 | 5.37 | 4.43 |
| TMEM184A           | 4.81 | 5.07 | 4.51 |
| TERT               | 4.81 | 5.17 | 4.35 |
| LINC00452          | 4.81 | 5.20 | 4.52 |
| RHBDD3             | 4.81 | 5.25 | 4.27 |
| QTRTD1             | 4.81 | 5.09 | 4.50 |
| ZNF480             | 4.81 | 5.23 | 4.38 |
| LOC400752          | 4.81 | 5.36 | 4.39 |
| LMLN               | 4.81 | 5.33 | 4.20 |
| CACNA1F            | 4.81 | 5.18 | 4.37 |
| CPEB3              | 4.81 | 5.38 | 4.33 |
| PPP1R14A           | 4.81 | 5.57 | 3.99 |
| RBPJL              | 4.81 | 5.07 | 4.33 |
| SMARCA5-AS1        | 4.81 | 5.11 | 4.50 |
| CPLX1              | 4.81 | 5.32 | 4.41 |
| ZNF786             | 4.81 | 5.36 | 4.51 |
| CNTN2              | 4.81 | 5.14 | 4.42 |
| SPIB               | 4.81 | 5.01 | 4.60 |
| FBXL6              | 4.81 | 5.13 | 4.44 |
| FGF8               | 4.81 | 5.26 | 4.48 |
| ALG10              | 4.81 | 5.38 | 4.32 |
| LDLRAD1            | 4.81 | 5.11 | 4.50 |
| LOC145474          | 4.81 | 5.43 | 4.05 |
| DFFA               | 4.81 | 5.12 | 4.51 |
| RPL37A             | 4.81 | 5.02 | 4.46 |
| KRTAP4-1           | 4.81 | 5.42 | 4.33 |

|                    |      |      |      |
|--------------------|------|------|------|
| CUEDC1             | 4.81 | 5.07 | 4.26 |
| PTPN7              | 4.81 | 5.39 | 4.29 |
| TMEM128            | 4.81 | 5.08 | 4.38 |
| UBAP1L             | 4.81 | 5.26 | 4.40 |
| RNA5SP134          | 4.81 | 5.92 | 3.85 |
| PLA2G1B            | 4.81 | 5.30 | 4.43 |
| GALE               | 4.81 | 5.26 | 4.43 |
| PLA2G2C            | 4.81 | 5.34 | 4.59 |
| OTTHUMG00000168217 | 4.81 | 5.21 | 4.28 |
| LOC399715          | 4.81 | 5.20 | 4.36 |
| MFNG               | 4.81 | 5.23 | 4.03 |
| CCM2L              | 4.81 | 5.36 | 4.34 |
| TMEM132A           | 4.81 | 5.21 | 4.20 |
| SETMAR             | 4.81 | 5.18 | 4.36 |
| RPS6KA4            | 4.81 | 5.18 | 4.44 |
| KRT17              | 4.81 | 5.57 | 4.22 |
| ST6GAL2            | 4.81 | 5.90 | 4.24 |
| IGHMBP2            | 4.80 | 5.38 | 4.56 |
| FLJ20464           | 4.80 | 5.07 | 4.45 |
| HPS1               | 4.80 | 5.23 | 4.53 |
| DRD2               | 4.80 | 5.17 | 4.60 |
| N4BP1              | 4.80 | 5.43 | 4.05 |
| LRRC23             | 4.80 | 5.21 | 4.46 |
| OTTHUMG00000168564 | 4.80 | 5.07 | 4.14 |
| ZNF137P            | 4.80 | 5.44 | 4.10 |
| GID4               | 4.80 | 5.22 | 4.53 |
| TBC1D10B           | 4.80 | 5.12 | 4.41 |
| CDH3               | 4.80 | 5.75 | 4.13 |
| C9orf173           | 4.80 | 5.17 | 4.38 |
| ORC5               | 4.80 | 5.24 | 4.48 |
| TTC5               | 4.80 | 5.34 | 4.17 |
| LRRC3DN            | 4.80 | 5.71 | 4.22 |
| SMIM3              | 4.80 | 5.66 | 3.92 |
| NRL                | 4.80 | 5.20 | 4.30 |
| OTTHUMG00000165613 | 4.80 | 5.12 | 4.44 |
| C2orf72            | 4.80 | 5.06 | 4.45 |
| MYH16              | 4.80 | 5.15 | 4.27 |
| OPRK1              | 4.80 | 5.20 | 4.46 |
| LIG3               | 4.80 | 5.07 | 4.40 |
| CCDC77             | 4.80 | 5.26 | 4.42 |
| OTTHUMG00000168893 | 4.80 | 5.14 | 4.33 |
| COG2               | 4.80 | 5.17 | 4.40 |
| NPM2               | 4.80 | 5.15 | 4.56 |
| TSPY4              | 4.80 | 5.75 | 3.88 |
| CHCHD3             | 4.80 | 5.32 | 4.26 |
| IL18               | 4.80 | 5.52 | 3.96 |
| BUB1B              | 4.80 | 5.14 | 4.49 |
| KCNS3              | 4.80 | 5.12 | 4.53 |
| SLC25A23           | 4.80 | 5.08 | 4.40 |

|                    |      |      |      |
|--------------------|------|------|------|
| LINC00087          | 4.80 | 5.28 | 3.93 |
| MIR205             | 4.80 | 5.19 | 4.47 |
| DFNB59             | 4.80 | 5.24 | 4.23 |
| INTS4              | 4.80 | 5.32 | 4.23 |
| C6orf132           | 4.80 | 5.19 | 4.46 |
| LOC100287387       | 4.80 | 5.32 | 4.45 |
| ANKRD44            | 4.80 | 5.37 | 4.44 |
| PRND               | 4.80 | 5.16 | 4.57 |
| MTCP1              | 4.80 | 5.41 | 4.53 |
| ALPK3              | 4.80 | 5.41 | 4.28 |
| ZNF252P            | 4.80 | 5.26 | 4.37 |
| C16orf71           | 4.80 | 5.15 | 4.55 |
| MINPP1             | 4.80 | 5.38 | 4.13 |
| LINC00894          | 4.80 | 5.19 | 3.94 |
| ZBTB18             | 4.80 | 5.28 | 4.48 |
| LOC100996662       | 4.80 | 5.05 | 4.33 |
| PNPLA7             | 4.80 | 5.13 | 4.48 |
| RUNX3              | 4.80 | 5.28 | 4.44 |
| TAAR5              | 4.80 | 5.60 | 4.01 |
| LOC145837          | 4.80 | 5.27 | 4.56 |
| RNF157             | 4.80 | 5.42 | 4.51 |
| LOC100506035       | 4.80 | 5.23 | 4.19 |
| PHOX2B             | 4.80 | 5.21 | 4.45 |
| DEFB103A           | 4.80 | 5.15 | 4.12 |
| OTTHUMG00000170115 | 4.80 | 5.39 | 4.34 |
| SLC5A1             | 4.80 | 5.05 | 4.50 |
| PRRT4              | 4.80 | 5.05 | 4.45 |
| GEMIN8             | 4.80 | 5.26 | 4.11 |
| GDF1               | 4.80 | 5.29 | 4.49 |
| EPN2-AS1           | 4.80 | 5.45 | 4.43 |
| TNS4               | 4.80 | 5.21 | 4.42 |
| OTTHUMG00000013379 | 4.80 | 5.27 | 4.33 |
| GHDC               | 4.80 | 5.20 | 4.39 |
| OTTHUMG00000160236 | 4.80 | 5.53 | 4.01 |
| KCTD4              | 4.80 | 5.13 | 4.49 |
| PEF1               | 4.80 | 5.26 | 4.31 |
| AURKC              | 4.80 | 5.33 | 4.48 |
| CCDC34             | 4.80 | 5.16 | 4.46 |
| LDLRAD2            | 4.80 | 5.12 | 4.10 |
| GCH1               | 4.80 | 5.74 | 4.43 |
| THUMPD2            | 4.80 | 5.43 | 4.40 |
| OTTHUMG00000164832 | 4.80 | 5.37 | 4.36 |
| IFI27L1            | 4.80 | 5.04 | 4.52 |
| PARVB              | 4.80 | 5.03 | 4.46 |
| PTCH2              | 4.80 | 5.23 | 4.03 |
| ZNF347             | 4.80 | 5.06 | 4.20 |
| MGAT2              | 4.80 | 5.34 | 3.75 |
| ZCCHC3             | 4.80 | 5.12 | 4.51 |
| C14orf166B         | 4.80 | 5.18 | 4.57 |

|                    |      |      |      |
|--------------------|------|------|------|
| OTTHUMG00000172684 | 4.80 | 5.31 | 4.21 |
| RSPH4A             | 4.80 | 5.14 | 4.49 |
| ZNF726             | 4.80 | 5.10 | 4.42 |
| MIR4534            | 4.80 | 5.54 | 3.77 |
| MAEA               | 4.80 | 5.03 | 4.60 |
| TNFRSF4            | 4.80 | 5.06 | 4.37 |
| RABL3              | 4.80 | 5.49 | 4.17 |
| KCNK4              | 4.80 | 5.23 | 4.47 |
| PRMT3              | 4.80 | 5.41 | 3.99 |
| GYLTL1B            | 4.80 | 5.13 | 4.37 |
| OTTHUMG00000014182 | 4.80 | 5.67 | 4.48 |
| OTTHUMG00000132354 | 4.80 | 5.08 | 4.32 |
| GH2                | 4.80 | 5.37 | 3.78 |
| SDK1               | 4.80 | 5.04 | 4.59 |
| SDC3               | 4.80 | 5.51 | 4.25 |
| WDR83              | 4.80 | 5.14 | 4.53 |
| LOC100506674       | 4.80 | 5.14 | 4.35 |
| FGF12-AS2          | 4.80 | 5.28 | 4.28 |
| FBXO5              | 4.80 | 5.24 | 4.26 |
| TPSAB1             | 4.79 | 5.39 | 4.11 |
| GDF11              | 4.79 | 5.29 | 4.31 |
| GPR162             | 4.79 | 5.05 | 4.36 |
| TLDC1              | 4.79 | 5.49 | 4.23 |
| AASDHPPT           | 4.79 | 5.27 | 4.39 |
| OTTHUMG00000156735 | 4.79 | 5.19 | 4.34 |
| TMEFF1             | 4.79 | 5.79 | 3.75 |
| PRDM15             | 4.79 | 5.04 | 4.43 |
| SPATA31A1          | 4.79 | 5.24 | 4.28 |
| CEP41              | 4.79 | 5.10 | 4.49 |
| CBLN2              | 4.79 | 5.34 | 4.44 |
| C18orf21           | 4.79 | 5.32 | 4.08 |
| PPL                | 4.79 | 5.40 | 4.33 |
| MTHFSD             | 4.79 | 5.04 | 4.41 |
| ZNF350             | 4.79 | 5.70 | 3.83 |
| VDR                | 4.79 | 4.98 | 4.41 |
| ZSCAN29            | 4.79 | 5.10 | 4.15 |
| PCSK9              | 4.79 | 5.02 | 4.49 |
| UBQLNL             | 4.79 | 5.09 | 4.27 |
| MIR3150B           | 4.79 | 5.22 | 4.45 |
| FAM213B            | 4.79 | 4.97 | 4.60 |
| MMP15              | 4.79 | 5.11 | 4.37 |
| C6orf223           | 4.79 | 5.12 | 4.24 |
| FGFR10P2           | 4.79 | 5.34 | 3.61 |
| CLDN23             | 4.79 | 5.12 | 4.40 |
| OTTHUMG00000155986 | 4.79 | 5.38 | 4.47 |
| TNFRSF10C          | 4.79 | 5.17 | 4.44 |
| SLC25A10           | 4.79 | 5.38 | 4.44 |
| TRPC2              | 4.79 | 5.16 | 4.54 |
| BTN2A2             | 4.79 | 5.56 | 4.50 |

|                    |      |      |      |
|--------------------|------|------|------|
| ARTN               | 4.79 | 5.14 | 4.35 |
| STK11IP            | 4.79 | 5.07 | 4.54 |
| HP07349            | 4.79 | 5.10 | 4.49 |
| POLD4              | 4.79 | 5.14 | 4.44 |
| TADA1              | 4.79 | 5.20 | 4.25 |
| HIST1H4D           | 4.79 | 5.37 | 3.94 |
| GPLD1              | 4.79 | 5.22 | 4.31 |
| DTNB               | 4.79 | 5.13 | 4.26 |
| PDSS2              | 4.79 | 5.51 | 4.38 |
| SLC38A9            | 4.79 | 5.14 | 4.41 |
| OTTHUMG00000160577 | 4.79 | 5.18 | 4.30 |
| DUSP26             | 4.79 | 5.48 | 4.40 |
| DDX39B-AS1         | 4.79 | 5.08 | 4.38 |
| LOC100129484       | 4.79 | 5.12 | 4.39 |
| PRSS48             | 4.79 | 5.18 | 4.10 |
| LOC284513          | 4.79 | 5.29 | 4.35 |
| DHRS11             | 4.79 | 5.00 | 4.29 |
| FKBPL              | 4.79 | 5.18 | 4.50 |
| TRNP1              | 4.79 | 5.30 | 4.51 |
| RPL32P3            | 4.79 | 4.96 | 4.27 |
| CDK6               | 4.79 | 5.61 | 4.32 |
| CROCCP3            | 4.79 | 5.18 | 4.16 |
| CD27               | 4.79 | 5.13 | 4.42 |
| CHAT               | 4.79 | 5.22 | 4.26 |
| PVT1               | 4.79 | 5.12 | 4.45 |
| DGAT2L7P           | 4.79 | 5.35 | 4.57 |
| BET1L              | 4.79 | 5.42 | 4.24 |
| PDP2               | 4.79 | 5.54 | 4.35 |
| APBB1              | 4.79 | 5.05 | 4.48 |
| GRM2               | 4.79 | 5.25 | 4.59 |
| CORO1B             | 4.79 | 5.19 | 4.37 |
| DUS2L              | 4.79 | 5.23 | 4.54 |
| HILS1              | 4.79 | 5.30 | 4.26 |
| FAM161B            | 4.79 | 5.10 | 4.50 |
| LOC100507507       | 4.79 | 5.28 | 4.11 |
| FOXD4L5            | 4.79 | 5.33 | 4.01 |
| NKX2-5             | 4.79 | 5.24 | 4.42 |
| C12orf5            | 4.79 | 5.17 | 4.33 |
| OTTHUMG00000019170 | 4.79 | 5.40 | 4.29 |
| SNORD114-31        | 4.79 | 6.43 | 3.40 |
| MANEA              | 4.79 | 5.55 | 3.88 |
| TAF1B              | 4.79 | 5.24 | 4.32 |
| TMEM260            | 4.79 | 5.23 | 4.25 |
| DDX59              | 4.79 | 5.12 | 4.22 |
| ALPI               | 4.79 | 5.56 | 4.35 |
| C14orf37           | 4.79 | 5.35 | 4.29 |
| GGT6               | 4.79 | 5.18 | 4.43 |
| TP53TG1            | 4.79 | 5.22 | 4.45 |
| HOXA1              | 4.79 | 5.20 | 4.35 |

|                    |      |      |      |
|--------------------|------|------|------|
| DENND2D            | 4.79 | 5.12 | 4.16 |
| LOC375196          | 4.79 | 5.06 | 4.58 |
| RBBP8              | 4.79 | 5.75 | 3.75 |
| ASPHD1             | 4.79 | 5.20 | 4.49 |
| INHA               | 4.79 | 5.14 | 4.52 |
| GATS               | 4.79 | 5.16 | 4.32 |
| XAGE3              | 4.79 | 5.23 | 4.25 |
| HIF3A              | 4.79 | 5.22 | 4.39 |
| CASK-AS1           | 4.79 | 5.85 | 3.94 |
| TELO2              | 4.79 | 5.41 | 4.36 |
| LOC727993          | 4.79 | 5.14 | 4.37 |
| TAS2R14            | 4.79 | 5.33 | 3.95 |
| ADAM28             | 4.79 | 5.28 | 4.28 |
| COX7A2L            | 4.79 | 5.16 | 4.41 |
| GRIP1              | 4.79 | 5.02 | 4.50 |
| ADORA3             | 4.79 | 5.26 | 4.25 |
| IQSEC2             | 4.79 | 5.14 | 4.44 |
| SLC39A1            | 4.79 | 5.13 | 4.32 |
| NAPA-AS1           | 4.79 | 4.96 | 4.51 |
| PCSK6              | 4.78 | 5.34 | 4.29 |
| LOC100289473       | 4.78 | 5.50 | 4.37 |
| DHRS12             | 4.78 | 5.06 | 4.42 |
| OTTHUMG00000155093 | 4.78 | 5.26 | 4.33 |
| GCC1               | 4.78 | 5.01 | 4.38 |
| C15orf56           | 4.78 | 5.07 | 4.24 |
| MRPS36             | 4.78 | 5.27 | 3.97 |
| UNC13A             | 4.78 | 5.11 | 4.29 |
| NAPRT1             | 4.78 | 5.15 | 4.53 |
| OTTHUMG00000168249 | 4.78 | 5.06 | 4.25 |
| OTTHUMG00000166415 | 4.78 | 5.13 | 4.27 |
| RASA2              | 4.78 | 5.36 | 3.95 |
| H1FX-AS1           | 4.78 | 5.00 | 4.54 |
| SMPDL3A            | 4.78 | 5.28 | 4.45 |
| TMEM38A            | 4.78 | 5.55 | 4.36 |
| DKFZp667F0711      | 4.78 | 5.13 | 4.26 |
| XCL2               | 4.78 | 5.39 | 4.28 |
| OPTC               | 4.78 | 5.28 | 4.23 |
| C2CD4D             | 4.78 | 5.27 | 4.41 |
| LOC101060308       | 4.78 | 5.22 | 4.31 |
| C5orf54            | 4.78 | 5.53 | 3.50 |
| LOC284023          | 4.78 | 5.16 | 4.46 |
| PDE5A              | 4.78 | 5.33 | 3.92 |
| SAAL1              | 4.78 | 5.07 | 4.53 |
| GDAP1              | 4.78 | 5.44 | 4.25 |
| CNTNAP3B           | 4.78 | 5.40 | 4.22 |
| POLG2              | 4.78 | 5.31 | 3.75 |
| WFDC3              | 4.78 | 5.45 | 3.91 |
| GJC3               | 4.78 | 5.27 | 4.25 |
| C22orf15           | 4.78 | 5.08 | 4.26 |

|                    |      |      |      |
|--------------------|------|------|------|
| OR8B8              | 4.78 | 5.52 | 3.94 |
| LOC100049716       | 4.78 | 5.17 | 4.28 |
| IFT27              | 4.78 | 5.10 | 4.57 |
| PUS3               | 4.78 | 5.35 | 4.34 |
| SLFNL1             | 4.78 | 5.33 | 4.07 |
| FLJ31183           | 4.78 | 5.25 | 4.40 |
| UCMA               | 4.78 | 5.65 | 3.93 |
| MIR449C            | 4.78 | 5.28 | 4.08 |
| CHAF1A             | 4.78 | 5.07 | 4.50 |
| OTTHUMG00000035181 | 4.78 | 5.09 | 4.45 |
| OTTHUMG00000168304 | 4.78 | 5.62 | 3.89 |
| HTR2A              | 4.78 | 5.50 | 4.19 |
| AQP7               | 4.78 | 5.23 | 4.17 |
| REEP6              | 4.78 | 5.08 | 4.55 |
| SVILP1             | 4.78 | 5.13 | 4.13 |
| SLC26A6            | 4.78 | 5.00 | 4.23 |
| IQCH-AS1           | 4.78 | 5.13 | 4.48 |
| PDZD3              | 4.78 | 5.15 | 4.51 |
| SLC22A31           | 4.78 | 5.08 | 4.47 |
| ASH1L-AS1          | 4.78 | 5.16 | 4.34 |
| LMAN2L             | 4.78 | 5.55 | 3.71 |
| LOC100505716       | 4.78 | 4.96 | 4.43 |
| TRBV6-9            | 4.78 | 5.26 | 4.35 |
| OTTHUMG00000168645 | 4.78 | 5.37 | 4.09 |
| CCDC155            | 4.78 | 5.42 | 4.21 |
| BLID               | 4.78 | 5.49 | 4.00 |
| MADCAM1            | 4.78 | 5.26 | 4.36 |
| LBP                | 4.78 | 5.76 | 4.14 |
| CRMP1              | 4.78 | 5.05 | 4.58 |
| C16orf87           | 4.78 | 5.53 | 4.34 |
| CDKN2AIPNL         | 4.78 | 5.09 | 4.43 |
| KIAA0930           | 4.78 | 5.12 | 4.03 |
| CHMP4C             | 4.78 | 5.31 | 4.29 |
| VMAC               | 4.78 | 5.21 | 4.30 |
| UVSSA              | 4.78 | 5.13 | 4.28 |
| RRN3P3             | 4.78 | 5.42 | 4.35 |
| ZNF700             | 4.78 | 5.22 | 4.48 |
| VGLL2              | 4.78 | 5.32 | 4.38 |
| NBEA               | 4.78 | 5.35 | 4.50 |
| LOC283440          | 4.78 | 5.09 | 4.44 |
| OTTHUMG00000163996 | 4.78 | 5.14 | 4.56 |
| CHRAC1             | 4.78 | 5.00 | 4.53 |
| IQCB1              | 4.78 | 5.09 | 4.13 |
| MIR3179-2          | 4.78 | 5.15 | 4.01 |
| CCDC135            | 4.78 | 5.21 | 4.35 |
| TMEM218            | 4.78 | 5.09 | 4.39 |
| LOC100507054       | 4.78 | 5.19 | 4.34 |
| PIK3C2B            | 4.78 | 5.26 | 4.26 |
| CPZ                | 4.78 | 5.21 | 4.23 |

|                    |      |      |      |
|--------------------|------|------|------|
| HTATIP2            | 4.78 | 5.03 | 4.45 |
| LOC100133207       | 4.78 | 5.34 | 4.44 |
| ACP6               | 4.78 | 5.03 | 4.40 |
| FGF17              | 4.78 | 5.26 | 4.12 |
| HS6ST1             | 4.78 | 5.17 | 4.37 |
| LRRC37B            | 4.78 | 5.53 | 3.92 |
| PRAMEF8            | 4.78 | 5.30 | 4.34 |
| MIR105-2           | 4.78 | 5.13 | 4.34 |
| KCNK16             | 4.78 | 5.11 | 4.46 |
| ADD2               | 4.78 | 5.16 | 4.37 |
| SOX7               | 4.77 | 5.18 | 4.38 |
| ACSS3              | 4.77 | 5.41 | 4.07 |
| LYSMD1             | 4.77 | 5.07 | 4.38 |
| PLEKHM1P           | 4.77 | 5.00 | 4.24 |
| INCA1              | 4.77 | 5.20 | 4.43 |
| GNG5               | 4.77 | 5.36 | 4.28 |
| MIR28              | 4.77 | 5.17 | 3.91 |
| OTTHUMG00000161598 | 4.77 | 5.43 | 3.88 |
| OTTHUMG00000032826 | 4.77 | 5.03 | 4.29 |
| ZNF772             | 4.77 | 5.22 | 4.50 |
| CTXN1              | 4.77 | 5.11 | 4.31 |
| CCDC154            | 4.77 | 5.13 | 4.42 |
| SPDEF              | 4.77 | 5.25 | 4.39 |
| C19orf25           | 4.77 | 5.04 | 4.52 |
| INSM1              | 4.77 | 5.28 | 4.00 |
| GPX6               | 4.77 | 5.48 | 4.20 |
| NRARP              | 4.77 | 5.75 | 4.21 |
| LOC100128002       | 4.77 | 5.33 | 4.48 |
| GNAO1              | 4.77 | 5.16 | 4.43 |
| SFN                | 4.77 | 5.10 | 4.37 |
| EIF2S3             | 4.77 | 5.18 | 3.91 |
| EVI2A              | 4.77 | 5.65 | 3.89 |
| C14orf182          | 4.77 | 5.12 | 4.47 |
| ZSCAN30            | 4.77 | 5.11 | 4.53 |
| AKR7L              | 4.77 | 5.23 | 3.64 |
| GGT8P              | 4.77 | 5.53 | 4.14 |
| LOC100507654       | 4.77 | 5.17 | 4.26 |
| ZNF253             | 4.77 | 5.51 | 4.05 |
| TMEM100            | 4.77 | 5.07 | 4.02 |
| KRTAP29-1          | 4.77 | 5.12 | 4.32 |
| SBNO2              | 4.77 | 5.31 | 4.55 |
| CFC1               | 4.77 | 5.15 | 4.39 |
| UBE2E1             | 4.77 | 5.07 | 4.26 |
| B3GALT2            | 4.77 | 5.23 | 4.35 |
| NHLH1              | 4.77 | 5.31 | 4.28 |
| SMAD7              | 4.77 | 5.27 | 4.38 |
| L3MBTL1            | 4.77 | 5.20 | 4.54 |
| NR5A1              | 4.77 | 5.09 | 4.43 |
| SNORD41            | 4.77 | 5.72 | 4.04 |



|                    |      |      |      |
|--------------------|------|------|------|
| PSMG3-AS1          | 4.77 | 5.46 | 4.47 |
| SCARNA21           | 4.77 | 5.11 | 4.33 |
| OTTHUMG00000171325 | 4.77 | 6.12 | 3.76 |
| LACTBL1            | 4.77 | 5.00 | 4.51 |
| MIR1286            | 4.77 | 5.15 | 4.33 |
| PRMT8              | 4.77 | 5.05 | 4.41 |
| MTERFD3            | 4.77 | 5.05 | 4.43 |
| TMEM86B            | 4.77 | 4.98 | 4.55 |
| CSRNP1             | 4.77 | 5.12 | 4.50 |
| FAM129C            | 4.77 | 5.28 | 4.37 |
| CARNS1             | 4.77 | 5.23 | 4.44 |
| OGFR               | 4.77 | 5.06 | 3.95 |
| OXTR               | 4.77 | 5.31 | 4.51 |
| MGC45922           | 4.77 | 5.12 | 4.53 |
| TRPM2              | 4.77 | 5.03 | 4.38 |
| BMP5               | 4.77 | 5.68 | 3.84 |
| ZNF138             | 4.77 | 5.30 | 4.30 |
| FAM41C             | 4.77 | 5.29 | 4.45 |
| CSRP2              | 4.77 | 5.50 | 4.14 |
| OVGP1              | 4.77 | 4.95 | 4.53 |
| TINAGL1            | 4.77 | 5.42 | 4.03 |
| EFCAB2             | 4.77 | 5.14 | 4.59 |
| OTTHUMG00000183930 | 4.77 | 5.21 | 4.40 |
| FXN                | 4.77 | 5.15 | 4.30 |
| OTTHUMG00000170749 | 4.77 | 5.03 | 4.50 |
| SEZ6L2             | 4.77 | 5.13 | 4.44 |
| LOC100129724       | 4.77 | 5.06 | 4.32 |
| ZNF341             | 4.77 | 5.00 | 4.41 |
| LOC100506405       | 4.77 | 5.14 | 4.28 |
| SPAG1              | 4.77 | 5.07 | 4.38 |
| LOC440149          | 4.77 | 5.42 | 4.32 |
| INHBA-AS1          | 4.77 | 5.23 | 4.40 |
| SARS2              | 4.77 | 5.07 | 4.48 |
| POM121L12          | 4.77 | 5.16 | 4.50 |
| MIR124-1           | 4.77 | 5.07 | 4.44 |
| C19orf52           | 4.77 | 5.16 | 4.48 |
| HEIH               | 4.77 | 5.10 | 4.35 |
| MORN4              | 4.77 | 5.28 | 4.38 |
| OXCT1-AS1          | 4.77 | 4.98 | 4.55 |
| MAGEA1             | 4.77 | 5.14 | 3.92 |
| RAB37              | 4.77 | 5.07 | 4.38 |
| C6orf25            | 4.77 | 5.23 | 4.49 |
| STAC2              | 4.77 | 5.10 | 4.50 |
| PEMT               | 4.77 | 5.28 | 4.37 |
| MF12-AS1           | 4.77 | 5.09 | 4.31 |
| LYRM2              | 4.77 | 4.95 | 4.57 |
| AATK               | 4.77 | 4.92 | 4.54 |
| TAF5               | 4.77 | 5.02 | 4.43 |
| LOC100996658       | 4.77 | 5.31 | 4.26 |

|                    |      |      |      |
|--------------------|------|------|------|
| TRBV7-3            | 4.77 | 5.40 | 4.33 |
| UNC5A              | 4.77 | 5.14 | 4.43 |
| NDUFA4             | 4.77 | 5.17 | 4.05 |
| GUCY1A3            | 4.77 | 5.95 | 3.78 |
| SMARCAL1           | 4.77 | 5.26 | 4.30 |
| FAM35BP            | 4.77 | 5.21 | 4.19 |
| NUDT12             | 4.77 | 5.38 | 4.06 |
| EPHX3              | 4.77 | 5.09 | 4.42 |
| ZNF470             | 4.77 | 5.28 | 4.45 |
| ANKRD20A1          | 4.77 | 5.58 | 3.93 |
| ANKRD20A4          | 4.77 | 5.58 | 3.93 |
| FAM124B            | 4.77 | 5.35 | 4.10 |
| PHOSPHO2-KLHL23    | 4.77 | 5.07 | 4.37 |
| LOC100128398       | 4.77 | 5.14 | 4.39 |
| FAM160A1           | 4.77 | 5.21 | 4.28 |
| MRPS27             | 4.77 | 5.10 | 4.26 |
| IL31RA             | 4.77 | 5.53 | 4.33 |
| OTTHUMG00000173288 | 4.77 | 5.14 | 4.31 |
| EGOT               | 4.77 | 5.45 | 4.04 |
| OTTHUMG00000170730 | 4.77 | 5.36 | 3.98 |
| BTBD16             | 4.77 | 5.27 | 4.49 |
| DPYSL4             | 4.77 | 5.23 | 4.41 |
| MLIP               | 4.77 | 5.27 | 4.41 |
| RNA5SP473          | 4.77 | 5.42 | 4.21 |
| HSPA12A            | 4.77 | 5.41 | 4.15 |
| TMEM210            | 4.77 | 5.26 | 4.21 |
| BLZF1              | 4.77 | 5.21 | 4.03 |
| SLC6A19            | 4.77 | 5.26 | 4.40 |
| HMGA2              | 4.77 | 5.24 | 4.43 |
| TTC24              | 4.76 | 5.51 | 4.36 |
| C18orf12           | 4.76 | 5.09 | 4.27 |
| MAGEA8             | 4.76 | 5.40 | 4.38 |
| SEC14L2            | 4.76 | 5.02 | 4.52 |
| VAT1L              | 4.76 | 5.01 | 4.12 |
| FGF4               | 4.76 | 4.90 | 4.59 |
| WIZ                | 4.76 | 5.29 | 4.36 |
| LOC100506901       | 4.76 | 5.61 | 4.09 |
| FAM200A            | 4.76 | 5.17 | 4.51 |
| MIR194-1           | 4.76 | 5.41 | 4.09 |
| SS18L2             | 4.76 | 5.44 | 4.13 |
| AMPH               | 4.76 | 6.05 | 3.95 |
| RNU1-19P           | 4.76 | 5.71 | 4.26 |
| RHNO1              | 4.76 | 5.21 | 4.28 |
| LOC100127967       | 4.76 | 5.30 | 4.05 |
| ITPKB-AS1          | 4.76 | 5.28 | 4.33 |
| ZNF41              | 4.76 | 5.07 | 4.39 |
| RPS6KA2-IT1        | 4.76 | 5.15 | 4.49 |
| DNASE1L3           | 4.76 | 5.61 | 3.82 |
| MIR4422            | 4.76 | 5.29 | 4.39 |

|                    |      |      |      |
|--------------------|------|------|------|
| AMER1              | 4.76 | 5.18 | 4.18 |
| CHRN2              | 4.76 | 5.10 | 4.39 |
| FAM178B            | 4.76 | 5.10 | 4.42 |
| OR2T4              | 4.76 | 5.90 | 4.05 |
| CEBPA              | 4.76 | 5.10 | 4.33 |
| OTTHUMG00000159392 | 4.76 | 5.29 | 4.34 |
| PKD1L1             | 4.76 | 5.04 | 4.16 |
| C4A-AS1            | 4.76 | 5.15 | 4.22 |
| GLMN               | 4.76 | 5.19 | 4.25 |
| KRTAP23-1          | 4.76 | 5.05 | 4.45 |
| NRN1L              | 4.76 | 5.03 | 4.49 |
| ABTB2              | 4.76 | 4.94 | 4.56 |
| CINP               | 4.76 | 5.07 | 3.91 |
| N4BP2L1            | 4.76 | 5.07 | 4.43 |
| SLC35F2            | 4.76 | 5.04 | 4.55 |
| LOC100507417       | 4.76 | 5.45 | 4.30 |
| HDAC2              | 4.76 | 5.19 | 4.20 |
| LOC100128653       | 4.76 | 5.39 | 4.11 |
| STOML1             | 4.76 | 5.03 | 4.44 |
| LOC441239          | 4.76 | 5.30 | 4.40 |
| OTTHUMG00000164284 | 4.76 | 5.64 | 4.12 |
| SLC18A2            | 4.76 | 5.24 | 4.36 |
| SUCLG1             | 4.76 | 5.27 | 4.32 |
| BSX                | 4.76 | 5.27 | 4.23 |
| ENC1               | 4.76 | 4.99 | 4.59 |
| POLR3F             | 4.76 | 5.24 | 4.41 |
| ARHGAP22-IT1       | 4.76 | 5.03 | 4.22 |
| GNAT2              | 4.76 | 5.06 | 4.36 |
| WDR13              | 4.76 | 5.15 | 4.32 |
| IGLL3P             | 4.76 | 5.35 | 3.76 |
| LOC100505478       | 4.76 | 5.32 | 3.98 |
| UNCX               | 4.76 | 5.02 | 4.59 |
| ZC3H12C            | 4.76 | 5.23 | 4.23 |
| FAM183CP           | 4.76 | 5.10 | 4.36 |
| CISH               | 4.76 | 5.02 | 4.41 |
| FAM153C            | 4.76 | 5.60 | 4.24 |
| RNA5SP64           | 4.76 | 5.49 | 3.57 |
| RNY3P7             | 4.76 | 5.52 | 3.93 |
| NOX4               | 4.76 | 5.68 | 3.91 |
| RPGR               | 4.76 | 5.05 | 4.40 |
| MLXIPL             | 4.76 | 5.23 | 4.40 |
| PIPOX              | 4.76 | 5.78 | 4.21 |
| GNA15              | 4.76 | 5.25 | 4.39 |
| PLXNA4             | 4.76 | 5.19 | 4.49 |
| SNAPC4             | 4.76 | 5.11 | 4.54 |
| IRF1               | 4.76 | 5.40 | 4.27 |
| RRP8               | 4.76 | 5.04 | 4.47 |
| TMC7               | 4.76 | 5.31 | 4.28 |
| KLHL35             | 4.76 | 5.15 | 4.14 |

|                    |      |      |      |
|--------------------|------|------|------|
| MRGPRG-AS1         | 4.76 | 5.12 | 4.47 |
| TRMT2A             | 4.76 | 5.04 | 4.21 |
| RECQL5             | 4.76 | 5.00 | 4.33 |
| C7orf10            | 4.76 | 5.18 | 4.04 |
| TKTL1              | 4.76 | 5.11 | 4.35 |
| LANCL2             | 4.76 | 5.06 | 4.47 |
| NIPAL3             | 4.76 | 5.08 | 4.47 |
| SNRPEP2            | 4.76 | 4.99 | 4.54 |
| WAS                | 4.76 | 5.07 | 4.45 |
| SEMA4F             | 4.76 | 5.24 | 4.40 |
| CCDC33             | 4.76 | 5.09 | 4.11 |
| INPP5J             | 4.76 | 5.30 | 4.28 |
| MAPT               | 4.76 | 5.08 | 4.23 |
| CES1P2             | 4.76 | 5.03 | 4.33 |
| OR51I1             | 4.76 | 5.01 | 4.45 |
| SLC28A2            | 4.76 | 5.06 | 4.47 |
| OTTHUMG00000034820 | 4.76 | 5.28 | 4.41 |
| FAM206A            | 4.76 | 5.07 | 4.50 |
| CYB5R2             | 4.76 | 5.07 | 4.55 |
| TMEM107            | 4.76 | 5.09 | 4.45 |
| C5orf17            | 4.76 | 5.23 | 4.57 |
| PPIL1              | 4.76 | 5.21 | 4.31 |
| HSD17B7            | 4.76 | 5.08 | 4.14 |
| DEFA1              | 4.76 | 5.25 | 4.15 |
| PDK2               | 4.76 | 5.25 | 4.20 |
| IPO11              | 4.76 | 5.12 | 4.47 |
| CCDC126            | 4.76 | 5.03 | 4.40 |
| HMHA1              | 4.76 | 5.19 | 4.23 |
| CENPV              | 4.76 | 5.21 | 4.29 |
| MON1B              | 4.76 | 5.07 | 4.50 |
| SYNE4              | 4.76 | 5.13 | 4.29 |
| ARHGAP36           | 4.76 | 5.19 | 4.34 |
| FOXP2              | 4.76 | 5.17 | 4.26 |
| MYLK4              | 4.76 | 5.11 | 4.46 |
| PROK1              | 4.76 | 5.11 | 4.33 |
| OTTHUMG00000151627 | 4.76 | 5.43 | 4.24 |
| CABP4              | 4.75 | 5.02 | 4.26 |
| OTTHUMG00000032097 | 4.75 | 5.49 | 4.43 |
| NYNRIN             | 4.75 | 5.01 | 4.52 |
| NKAIN3             | 4.75 | 5.03 | 4.49 |
| TM4SF18            | 4.75 | 5.85 | 3.87 |
| NXPH4              | 4.75 | 5.29 | 4.22 |
| GIMAP2             | 4.75 | 5.39 | 3.89 |
| MIR4799            | 4.75 | 5.17 | 4.33 |
| MGC16142           | 4.75 | 5.16 | 4.30 |
| TRAF3IP3           | 4.75 | 5.11 | 4.45 |
| OTTHUMG00000000564 | 4.75 | 5.18 | 4.09 |
| OTTHUMG00000150605 | 4.75 | 5.82 | 4.16 |
| NCAPG2             | 4.75 | 5.18 | 4.46 |

|                    |      |      |      |
|--------------------|------|------|------|
| OTTHUMG00000164576 | 4.75 | 5.12 | 4.47 |
| OR6V1              | 4.75 | 5.43 | 4.07 |
| PHKA1              | 4.75 | 5.19 | 4.23 |
| RHPN1-AS1          | 4.75 | 5.30 | 4.27 |
| C16orf89           | 4.75 | 5.00 | 4.39 |
| EFCAB4A            | 4.75 | 4.99 | 4.17 |
| BCL2L1             | 4.75 | 5.22 | 4.25 |
| DIRAS2             | 4.75 | 5.06 | 4.50 |
| MCAM               | 4.75 | 5.35 | 4.17 |
| ATP7B              | 4.75 | 5.18 | 4.51 |
| C7orf34            | 4.75 | 5.03 | 4.43 |
| POFUT1             | 4.75 | 5.23 | 4.29 |
| SAPCD2             | 4.75 | 4.99 | 4.59 |
| DIMT1              | 4.75 | 4.88 | 4.42 |
| BIN3-IT1           | 4.75 | 4.97 | 4.57 |
| MIR4733            | 4.75 | 5.17 | 3.76 |
| ORC6               | 4.75 | 5.18 | 4.28 |
| ESPNP              | 4.75 | 5.43 | 4.25 |
| GABRD              | 4.75 | 5.07 | 4.30 |
| SCARNA6            | 4.75 | 5.29 | 4.24 |
| TMEM183B           | 4.75 | 5.15 | 4.11 |
| MIS18A             | 4.75 | 5.12 | 4.26 |
| BCRP3              | 4.75 | 5.58 | 3.86 |
| C17orf96           | 4.75 | 5.00 | 4.46 |
| OTTHUMG00000163630 | 4.75 | 5.42 | 4.44 |
| OTTHUMG00000154167 | 4.75 | 4.97 | 4.46 |
| ART1               | 4.75 | 5.30 | 4.32 |
| OTTHUMG00000151420 | 4.75 | 5.22 | 4.12 |
| DNAL1              | 4.75 | 5.11 | 4.41 |
| LACTB2             | 4.75 | 5.19 | 3.97 |
| MS4A4A             | 4.75 | 6.05 | 4.08 |
| KLRAP1             | 4.75 | 5.08 | 4.39 |
| PTPN5              | 4.75 | 5.20 | 4.19 |
| LINC00565          | 4.75 | 4.94 | 4.37 |
| PRDM10             | 4.75 | 5.08 | 4.57 |
| OTUD3              | 4.75 | 5.10 | 4.47 |
| LOC100996490       | 4.75 | 4.98 | 4.55 |
| GTPBP8             | 4.75 | 5.26 | 4.32 |
| DOK1               | 4.75 | 5.03 | 4.42 |
| WEE2               | 4.75 | 5.33 | 4.44 |
| KRT86              | 4.75 | 5.32 | 4.09 |
| AQP2               | 4.75 | 5.04 | 4.42 |
| PLB1               | 4.75 | 5.09 | 4.21 |
| HOMER3             | 4.75 | 5.41 | 4.27 |
| C19orf57           | 4.75 | 5.10 | 4.50 |
| LOC100130193       | 4.75 | 5.55 | 4.12 |
| BSPRY              | 4.75 | 5.05 | 4.54 |
| TMEM88             | 4.75 | 5.27 | 4.33 |
| KLC2               | 4.75 | 5.17 | 4.28 |

|                    |      |      |      |
|--------------------|------|------|------|
| FLJ30679           | 4.75 | 5.40 | 4.38 |
| OTTHUMG00000009373 | 4.75 | 5.38 | 4.21 |
| PBXIP1             | 4.75 | 5.38 | 4.24 |
| ZNF81              | 4.75 | 5.12 | 4.34 |
| SEMA7A             | 4.75 | 5.29 | 4.33 |
| CDC45              | 4.75 | 5.21 | 4.45 |
| COA6               | 4.75 | 5.16 | 4.10 |
| OTTHUMG00000014331 | 4.75 | 5.15 | 4.33 |
| TRMT61A            | 4.75 | 5.07 | 4.48 |
| RBM48              | 4.75 | 5.10 | 4.29 |
| CLCN7              | 4.75 | 5.35 | 4.28 |
| ULK1               | 4.75 | 4.95 | 4.36 |
| PRSS35             | 4.74 | 5.71 | 3.88 |
| MED26              | 4.74 | 4.94 | 4.40 |
| LOC100129083       | 4.74 | 5.48 | 3.92 |
| DUS1L              | 4.74 | 5.17 | 4.22 |
| SNORD116-20        | 4.74 | 5.48 | 3.93 |
| CDC42EP4           | 4.74 | 5.17 | 4.19 |
| USP35              | 4.74 | 4.97 | 4.46 |
| BOLA3              | 4.74 | 5.29 | 4.18 |
| ADAT1              | 4.74 | 5.20 | 4.50 |
| PA2G4              | 4.74 | 4.96 | 4.51 |
| OR2K2              | 4.74 | 5.27 | 4.22 |
| AFAP1L1            | 4.74 | 5.55 | 4.35 |
| FOXD4L1            | 4.74 | 5.44 | 4.17 |
| HERC6              | 4.74 | 5.20 | 4.25 |
| LOC730081          | 4.74 | 5.34 | 4.33 |
| IGFL4              | 4.74 | 5.26 | 4.42 |
| DCC                | 4.74 | 6.18 | 3.88 |
| NPM1               | 4.74 | 5.11 | 4.33 |
| ATG16L1            | 4.74 | 5.23 | 4.49 |
| FLJ46026           | 4.74 | 5.27 | 4.47 |
| USP32P1            | 4.74 | 5.31 | 3.91 |
| OTTHUMG00000168374 | 4.74 | 5.51 | 4.26 |
| SLC19A1            | 4.74 | 4.99 | 4.54 |
| C20orf202          | 4.74 | 4.97 | 4.36 |
| TOB2               | 4.74 | 5.14 | 4.12 |
| TBX2               | 4.74 | 5.08 | 4.23 |
| XYLT2              | 4.74 | 5.18 | 4.39 |
| MIR3160-1          | 4.74 | 5.03 | 4.31 |
| ZBED6CL            | 4.74 | 5.08 | 4.34 |
| SLC22A8            | 4.74 | 5.34 | 4.16 |
| BTN3A3             | 4.74 | 5.40 | 4.19 |
| ERCC4              | 4.74 | 5.02 | 4.49 |
| CCDC24             | 4.74 | 5.15 | 4.44 |
| GXYLT1             | 4.74 | 5.00 | 4.37 |
| TRIM67             | 4.74 | 4.96 | 4.40 |
| LOC100129518       | 4.74 | 5.28 | 3.76 |
| C1orf61            | 4.74 | 5.07 | 4.53 |

|                    |      |      |      |
|--------------------|------|------|------|
| GPR176             | 4.74 | 5.37 | 4.07 |
| MAP3K9             | 4.74 | 5.32 | 4.42 |
| IQCA1P1            | 4.74 | 5.04 | 4.54 |
| SHCBP1             | 4.74 | 5.51 | 4.35 |
| GALNT14            | 4.74 | 5.50 | 4.39 |
| BBS5               | 4.74 | 5.15 | 4.26 |
| C17orf53           | 4.74 | 5.13 | 4.48 |
| MIR3659            | 4.74 | 5.46 | 4.08 |
| SERPINA10          | 4.74 | 5.10 | 4.24 |
| ZMAT1              | 4.74 | 5.41 | 4.31 |
| FAM107A            | 4.74 | 5.05 | 4.38 |
| KIAA0125           | 4.74 | 5.50 | 3.98 |
| RNA5SP521          | 4.74 | 5.29 | 4.33 |
| SOHLH1             | 4.74 | 4.92 | 4.49 |
| ZNRF4              | 4.74 | 5.15 | 4.19 |
| PDE10A             | 4.74 | 5.24 | 4.14 |
| OR1F2P             | 4.74 | 5.32 | 4.29 |
| CCL18              | 4.74 | 5.47 | 4.27 |
| LOC100505550       | 4.74 | 5.17 | 4.50 |
| LOC100128908       | 4.74 | 5.28 | 4.10 |
| ENKD1              | 4.74 | 5.04 | 4.48 |
| SRGAP3-AS4         | 4.74 | 5.04 | 4.28 |
| LINC00654          | 4.74 | 5.12 | 4.41 |
| SARDH              | 4.74 | 5.01 | 4.38 |
| NACC2              | 4.74 | 5.05 | 4.42 |
| RNA5SP330          | 4.74 | 5.17 | 4.40 |
| LOC100129534       | 4.74 | 5.19 | 4.44 |
| LOC100130071       | 4.74 | 5.26 | 4.21 |
| LRRC8D             | 4.74 | 5.04 | 4.30 |
| SLC5A10            | 4.74 | 5.03 | 4.54 |
| CYP46A1            | 4.74 | 5.02 | 4.37 |
| NME3               | 4.74 | 5.00 | 4.42 |
| STRBP              | 4.74 | 5.03 | 4.42 |
| CNNM2              | 4.74 | 5.06 | 4.43 |
| CEP57L1            | 4.74 | 5.19 | 3.84 |
| LINC00950          | 4.74 | 5.18 | 4.38 |
| OTTHUMG00000168057 | 4.74 | 5.09 | 4.34 |
| MLPH               | 4.74 | 5.19 | 4.29 |
| FAM47E             | 4.74 | 4.94 | 4.58 |
| RELT               | 4.74 | 5.19 | 4.37 |
| LRRCC1             | 4.74 | 5.29 | 3.94 |
| RNF43              | 4.74 | 5.13 | 4.47 |
| RSPO1              | 4.74 | 5.28 | 4.48 |
| MIP                | 4.74 | 5.00 | 4.43 |
| ZNF594             | 4.74 | 5.30 | 4.40 |
| HMG2               | 4.73 | 5.08 | 3.57 |
| VPS18              | 4.73 | 5.18 | 4.09 |
| RNA5SP110          | 4.73 | 6.48 | 4.17 |
| DCAF17             | 4.73 | 5.04 | 4.18 |

|                    |      |      |      |
|--------------------|------|------|------|
| GET4               | 4.73 | 5.03 | 4.33 |
| LOC100499221       | 4.73 | 5.26 | 4.33 |
| ZNF300P1           | 4.73 | 5.10 | 4.33 |
| SPATA19            | 4.73 | 5.12 | 4.26 |
| ALG5               | 4.73 | 5.30 | 4.01 |
| GLI4               | 4.73 | 5.36 | 4.41 |
| CCR9               | 4.73 | 5.08 | 4.31 |
| DNAI2              | 4.73 | 4.99 | 4.34 |
| CCDC13             | 4.73 | 5.10 | 4.32 |
| UNC119             | 4.73 | 5.06 | 4.40 |
| LOC401480          | 4.73 | 5.10 | 4.34 |
| CXorf49            | 4.73 | 5.02 | 4.32 |
| HIST1H2BC          | 4.73 | 5.81 | 3.53 |
| ALDH3A1            | 4.73 | 5.05 | 4.40 |
| OTTHUMG00000182495 | 4.73 | 5.53 | 4.03 |
| TMEM92             | 4.73 | 5.41 | 4.40 |
| NRTN               | 4.73 | 5.29 | 4.11 |
| GALNT12            | 4.73 | 5.26 | 4.38 |
| LSM14B             | 4.73 | 4.88 | 4.55 |
| RAPGEF5            | 4.73 | 5.44 | 4.06 |
| LOC151657          | 4.73 | 5.17 | 4.14 |
| OTTHUMG00000171570 | 4.73 | 5.46 | 4.33 |
| CCDC37             | 4.73 | 5.26 | 4.38 |
| WFIKKN2            | 4.73 | 4.98 | 4.26 |
| ZBTB11-AS1         | 4.73 | 4.98 | 4.38 |
| OTTHUMG00000171639 | 4.73 | 5.05 | 4.26 |
| RNU7-27P           | 4.73 | 5.43 | 3.95 |
| MYT1               | 4.73 | 5.24 | 3.93 |
| LOC100133077       | 4.73 | 5.11 | 4.36 |
| RAB40B             | 4.73 | 5.09 | 4.05 |
| HYAL1              | 4.73 | 5.06 | 4.53 |
| C6orf57            | 4.73 | 5.30 | 3.84 |
| OTTHUMG00000166127 | 4.73 | 5.11 | 4.19 |
| TNNI1              | 4.73 | 5.23 | 4.35 |
| OTTHUMG00000171299 | 4.73 | 5.03 | 4.31 |
| SPAG8              | 4.73 | 4.98 | 4.59 |
| RAB3A              | 4.73 | 5.24 | 4.32 |
| HAP1               | 4.73 | 5.19 | 4.42 |
| KIR3DX1            | 4.73 | 5.08 | 4.49 |
| C1orf167           | 4.73 | 5.29 | 4.49 |
| C8orf82            | 4.73 | 4.99 | 4.28 |
| NR3C2              | 4.73 | 5.07 | 4.27 |
| DCAF13P3           | 4.73 | 5.30 | 3.89 |
| MIR1265            | 4.73 | 5.78 | 3.98 |
| PPP1R13L           | 4.73 | 5.30 | 4.18 |
| CLIC5              | 4.73 | 5.69 | 3.38 |
| DSERG1             | 4.73 | 5.40 | 4.01 |
| ZRANB2-AS2         | 4.73 | 5.03 | 4.31 |
| RNA5SP362          | 4.73 | 5.07 | 4.42 |



|                    |      |      |      |
|--------------------|------|------|------|
| OR111              | 4.73 | 5.05 | 4.36 |
| MIR4697HG          | 4.73 | 5.17 | 4.33 |
| LOC101060449       | 4.73 | 5.32 | 3.94 |
| GPR62              | 4.73 | 5.04 | 4.34 |
| MIR1294            | 4.73 | 5.52 | 4.37 |
| MYH14              | 4.73 | 5.09 | 4.38 |
| OTTHUMG00000171943 | 4.73 | 5.16 | 3.85 |
| CXorf40A           | 4.73 | 5.35 | 4.10 |
| GHR                | 4.73 | 5.37 | 3.43 |
| PDLIM2             | 4.73 | 5.13 | 4.50 |
| SCYL2              | 4.73 | 5.12 | 4.20 |
| NTRK1              | 4.73 | 5.34 | 4.14 |
| EXD2               | 4.73 | 5.15 | 3.92 |
| LOC100509315       | 4.73 | 5.11 | 4.44 |
| BPIFA1             | 4.73 | 5.54 | 4.44 |
| FLJ45079           | 4.73 | 5.27 | 4.20 |
| ANKRD29            | 4.73 | 5.39 | 4.25 |
| TPCN2              | 4.73 | 5.00 | 4.41 |
| LOC100507250       | 4.73 | 5.26 | 4.27 |
| PRKG1              | 4.73 | 5.37 | 3.64 |
| SNPH               | 4.73 | 5.08 | 4.36 |
| LRFN5              | 4.73 | 5.52 | 4.18 |
| PP13               | 4.73 | 5.20 | 4.21 |
| CCDC162P           | 4.73 | 5.21 | 3.82 |
| KIF21B             | 4.73 | 5.22 | 4.53 |
| SDR9C7             | 4.73 | 5.30 | 4.35 |
| LOC100506051       | 4.73 | 5.02 | 4.14 |
| SEMA6A             | 4.73 | 5.17 | 4.28 |
| DMRTB1             | 4.73 | 5.31 | 4.23 |
| AIF1L              | 4.73 | 5.21 | 4.37 |
| CECR9              | 4.73 | 5.22 | 4.08 |
| OTTHUMG00000172420 | 4.73 | 5.38 | 4.12 |
| TRIM45             | 4.73 | 5.03 | 4.30 |
| CARS2              | 4.73 | 4.97 | 4.42 |
| LGALS7B            | 4.73 | 4.94 | 4.57 |
| TLL1               | 4.73 | 5.04 | 4.18 |
| MMRN2              | 4.72 | 5.02 | 4.34 |
| HOGA1              | 4.72 | 5.04 | 4.50 |
| LOC100505782       | 4.72 | 5.01 | 4.29 |
| MAB21L2            | 4.72 | 5.04 | 4.25 |
| KATNAL2            | 4.72 | 4.96 | 4.55 |
| ZNF443             | 4.72 | 5.03 | 4.20 |
| LOC100129999       | 4.72 | 5.13 | 4.36 |
| SUV39H1            | 4.72 | 5.09 | 4.47 |
| POR                | 4.72 | 4.92 | 4.35 |
| TMSB4XP4           | 4.72 | 5.29 | 3.89 |
| TNNT2              | 4.72 | 5.21 | 3.95 |
| APOL2              | 4.72 | 5.19 | 4.24 |
| OTTHUMG00000152374 | 4.72 | 4.99 | 4.38 |

|                    |      |      |      |
|--------------------|------|------|------|
| GPR110             | 4.72 | 5.27 | 4.11 |
| SP6                | 4.72 | 5.10 | 4.37 |
| DUS3L              | 4.72 | 4.98 | 4.39 |
| IGHG3              | 4.72 | 5.25 | 4.01 |
| OTTHUMG00000166506 | 4.72 | 5.21 | 4.29 |
| TRIM21             | 4.72 | 5.00 | 4.44 |
| RPL39L             | 4.72 | 5.79 | 3.90 |
| LCN12              | 4.72 | 5.06 | 4.25 |
| C7orf61            | 4.72 | 5.16 | 4.43 |
| LOC100131510       | 4.72 | 5.37 | 4.24 |
| OTTHUMG00000017650 | 4.72 | 5.30 | 4.35 |
| DNAJC30            | 4.72 | 5.45 | 4.45 |
| CYP26B1            | 4.72 | 5.34 | 4.29 |
| TSPAN9             | 4.72 | 5.03 | 4.30 |
| IL1F10             | 4.72 | 5.20 | 4.16 |
| LOC100133985       | 4.72 | 5.44 | 4.09 |
| CD72               | 4.72 | 4.99 | 4.29 |
| ABCC6              | 4.72 | 5.55 | 4.33 |
| SLC6A17            | 4.72 | 5.31 | 4.28 |
| GUCY2EP            | 4.72 | 4.93 | 4.42 |
| MPP7               | 4.72 | 5.49 | 4.11 |
| EFCAB11            | 4.72 | 4.96 | 4.36 |
| RBFOX3             | 4.72 | 5.10 | 4.45 |
| NKX6-2             | 4.72 | 5.01 | 4.44 |
| TRAM1L1            | 4.72 | 5.23 | 4.33 |
| PINLYP             | 4.72 | 5.13 | 4.40 |
| MAGOHB             | 4.72 | 5.40 | 4.13 |
| SPATA31A3          | 4.72 | 5.30 | 4.21 |
| OTTHUMG00000161871 | 4.72 | 5.32 | 4.22 |
| SCN4A              | 4.72 | 5.35 | 4.39 |
| LINC00683          | 4.72 | 5.12 | 4.29 |
| OTTHUMG00000018145 | 4.72 | 5.10 | 4.38 |
| KCNG1              | 4.72 | 5.25 | 4.49 |
| OSTM1-AS1          | 4.72 | 5.27 | 3.92 |
| SNCG               | 4.72 | 5.03 | 4.32 |
| LRR1               | 4.72 | 5.17 | 3.95 |
| DKFZP434A062       | 4.72 | 5.00 | 4.41 |
| GRP                | 4.72 | 5.11 | 3.94 |
| FAM99A             | 4.72 | 5.09 | 4.20 |
| SURF6              | 4.72 | 4.96 | 4.45 |
| SCAI               | 4.72 | 5.09 | 4.46 |
| ZNF280B            | 4.72 | 5.46 | 4.05 |
| LINC00954          | 4.72 | 5.07 | 4.27 |
| ADAM11             | 4.72 | 5.00 | 4.15 |
| FAM198A            | 4.72 | 5.26 | 4.41 |
| LRRC24             | 4.72 | 5.19 | 4.28 |
| DKKL1              | 4.72 | 5.22 | 4.32 |
| CPT2               | 4.72 | 5.24 | 3.89 |
| FAM120C            | 4.72 | 4.96 | 4.41 |

|                    |      |      |      |
|--------------------|------|------|------|
| PAXBP1-AS1         | 4.72 | 5.08 | 4.26 |
| HAUS2              | 4.72 | 5.41 | 4.19 |
| PAPPA              | 4.72 | 5.60 | 4.35 |
| MBOAT7             | 4.72 | 5.08 | 4.23 |
| LOC100505949       | 4.72 | 5.33 | 4.41 |
| BAAT               | 4.72 | 5.12 | 3.87 |
| CDK10              | 4.72 | 5.08 | 4.25 |
| GRM6               | 4.72 | 5.15 | 4.10 |
| KCNH3              | 4.72 | 5.05 | 4.44 |
| AMICA1             | 4.72 | 5.23 | 4.27 |
| SYK                | 4.72 | 5.54 | 4.27 |
| MED7               | 4.72 | 4.87 | 4.46 |
| WFDC2              | 4.72 | 5.24 | 4.32 |
| SLC25A19           | 4.72 | 5.40 | 4.21 |
| METTL2A            | 4.72 | 5.48 | 3.55 |
| GAS5-AS1           | 4.72 | 5.13 | 4.34 |
| POU4F1             | 4.71 | 5.06 | 4.31 |
| ZKSCAN4            | 4.71 | 5.07 | 4.02 |
| RARRES1            | 4.71 | 5.02 | 4.25 |
| FGF11              | 4.71 | 5.51 | 4.09 |
| JRKL               | 4.71 | 5.07 | 4.55 |
| TRAV22             | 4.71 | 5.30 | 4.37 |
| ZNF415             | 4.71 | 5.17 | 4.39 |
| ALDH3B2            | 4.71 | 5.30 | 4.04 |
| P2RX6              | 4.71 | 5.20 | 4.25 |
| MIR1245B           | 4.71 | 6.46 | 2.64 |
| AP3B2              | 4.71 | 5.13 | 4.35 |
| BOK-AS1            | 4.71 | 5.17 | 4.30 |
| ST8SIA1            | 4.71 | 5.06 | 4.36 |
| KCNQ2              | 4.71 | 5.08 | 4.23 |
| STMN2              | 4.71 | 5.19 | 4.35 |
| ZNF425             | 4.71 | 4.94 | 4.38 |
| OTTHUMG00000045388 | 4.71 | 5.23 | 4.03 |
| GRTP1              | 4.71 | 4.98 | 4.39 |
| LOC100505622       | 4.71 | 5.16 | 4.23 |
| ZBTB9              | 4.71 | 5.24 | 4.41 |
| OTTHUMG00000150113 | 4.71 | 5.30 | 4.08 |
| COQ2               | 4.71 | 5.19 | 4.12 |
| LOC255130          | 4.71 | 5.07 | 4.47 |
| ZFP2               | 4.71 | 4.98 | 4.31 |
| LOC100996286       | 4.71 | 5.32 | 3.75 |
| DAND5              | 4.71 | 4.95 | 4.16 |
| ZNF133             | 4.71 | 4.90 | 4.48 |
| LOC79015           | 4.71 | 5.09 | 4.51 |
| TRIM14             | 4.71 | 5.07 | 4.40 |
| OTTHUMG00000014930 | 4.71 | 5.21 | 4.09 |
| NPM3               | 4.71 | 4.83 | 4.51 |
| RIMBP3C            | 4.71 | 5.04 | 4.27 |
| ABCC8              | 4.71 | 5.00 | 4.28 |

|                    |      |      |      |
|--------------------|------|------|------|
| ZNF283             | 4.71 | 5.40 | 3.80 |
| LANCL1             | 4.71 | 5.05 | 4.26 |
| KCNE1              | 4.71 | 5.06 | 4.09 |
| TTC7B              | 4.71 | 5.02 | 4.26 |
| ATP6V1E2           | 4.71 | 5.19 | 4.30 |
| GRTP1-AS1          | 4.71 | 4.91 | 4.50 |
| MTFP1              | 4.71 | 5.07 | 4.37 |
| C14orf23           | 4.71 | 5.29 | 4.12 |
| CNTNAP1            | 4.71 | 5.17 | 4.24 |
| OTTHUMG00000017359 | 4.71 | 5.22 | 4.27 |
| PAG1               | 4.71 | 5.17 | 4.20 |
| MAN2A2             | 4.71 | 4.91 | 4.39 |
| FAM74A4            | 4.71 | 5.17 | 4.18 |
| AKR1B1P6           | 4.71 | 5.36 | 4.22 |
| RPL28              | 4.71 | 4.95 | 4.30 |
| PAX4               | 4.71 | 5.40 | 4.49 |
| TMEM200C           | 4.71 | 5.20 | 4.26 |
| IL1RL2             | 4.71 | 5.18 | 4.21 |
| RIMS3              | 4.71 | 5.00 | 4.26 |
| C19orf69           | 4.71 | 5.19 | 4.07 |
| OTTHUMG00000171473 | 4.71 | 6.14 | 3.32 |
| DBF4B              | 4.71 | 5.09 | 4.36 |
| MIR758             | 4.71 | 5.41 | 4.24 |
| H6PD               | 4.71 | 5.22 | 4.17 |
| LRRC14B            | 4.71 | 5.06 | 4.18 |
| CAV3               | 4.71 | 5.16 | 4.32 |
| WNT7A              | 4.71 | 5.28 | 4.15 |
| CA13               | 4.71 | 4.99 | 4.28 |
| LOC100132215       | 4.71 | 5.25 | 4.34 |
| TTLL11-IT1         | 4.71 | 5.08 | 4.29 |
| LOC100133957       | 4.71 | 4.97 | 4.20 |
| LOC100996672       | 4.71 | 5.22 | 4.14 |
| RNF126P1           | 4.71 | 5.00 | 4.24 |
| TPPP2              | 4.71 | 5.03 | 4.36 |
| BET1               | 4.71 | 5.20 | 4.35 |
| APC2               | 4.71 | 5.24 | 4.42 |
| C9orf106           | 4.71 | 5.24 | 4.26 |
| CMTM1              | 4.71 | 5.24 | 4.37 |
| INGX               | 4.71 | 5.16 | 4.42 |
| FSD2               | 4.71 | 4.94 | 4.19 |
| TEX9               | 4.71 | 5.00 | 4.03 |
| ATP8A1             | 4.71 | 5.16 | 4.32 |
| MPPED2             | 4.70 | 5.74 | 3.94 |
| TRIM59             | 4.70 | 5.31 | 4.16 |
| ZNF668             | 4.70 | 5.13 | 3.87 |
| SC5D               | 4.70 | 5.22 | 4.06 |
| FBN3               | 4.70 | 5.11 | 4.26 |
| EVA1C              | 4.70 | 5.03 | 4.41 |
| USP43              | 4.70 | 5.05 | 4.41 |

|                    |      |      |      |
|--------------------|------|------|------|
| PLAC8              | 4.70 | 5.27 | 4.31 |
| NCS1               | 4.70 | 5.18 | 3.89 |
| CCDC60             | 4.70 | 5.10 | 4.22 |
| LINC00243          | 4.70 | 5.10 | 4.43 |
| RETN               | 4.70 | 5.13 | 4.15 |
| RTL1               | 4.70 | 5.01 | 4.28 |
| FCGBP              | 4.70 | 5.33 | 4.00 |
| CCDC58             | 4.70 | 5.13 | 3.95 |
| TMC2               | 4.70 | 4.91 | 4.43 |
| INTS9              | 4.70 | 5.14 | 4.28 |
| ZNF774             | 4.70 | 4.98 | 4.42 |
| OTTHUMG00000164174 | 4.70 | 5.47 | 3.76 |
| DZANK1             | 4.70 | 5.16 | 4.40 |
| TSPAN12            | 4.70 | 5.16 | 4.42 |
| INPP5A             | 4.70 | 4.84 | 4.35 |
| WAC-AS1            | 4.70 | 4.90 | 4.33 |
| OTTHUMG00000169388 | 4.70 | 5.06 | 4.20 |
| SNHG11             | 4.70 | 5.08 | 4.38 |
| ST20               | 4.70 | 4.92 | 4.27 |
| LINC00885          | 4.70 | 5.10 | 3.89 |
| MLNR               | 4.70 | 5.02 | 4.22 |
| FAM175A            | 4.70 | 5.10 | 4.24 |
| TRDMT1             | 4.70 | 5.29 | 4.31 |
| OTTHUMG00000165228 | 4.70 | 5.44 | 4.29 |
| DPY19L1            | 4.70 | 5.09 | 4.46 |
| IGHV3-33           | 4.70 | 5.32 | 4.11 |
| PTGER1             | 4.70 | 5.30 | 4.39 |
| ARC                | 4.70 | 4.98 | 4.34 |
| OTTHUMG00000169068 | 4.70 | 5.13 | 4.39 |
| CMC1               | 4.70 | 5.03 | 4.33 |
| LRRC30             | 4.70 | 5.00 | 4.40 |
| OTTHUMG00000037161 | 4.70 | 5.09 | 4.22 |
| SLC22A18AS         | 4.70 | 5.25 | 4.35 |
| HHIP-AS1           | 4.70 | 5.15 | 4.16 |
| COPG2              | 4.70 | 5.18 | 4.48 |
| HAVCR1P1           | 4.70 | 5.38 | 3.92 |
| MAL                | 4.70 | 5.01 | 4.23 |
| TEX40              | 4.70 | 5.08 | 4.49 |
| SIRPB1             | 4.70 | 5.14 | 4.11 |
| CCDC171            | 4.70 | 5.02 | 4.28 |
| OTTHUMG00000176406 | 4.70 | 5.26 | 4.21 |
| ZNF790-AS1         | 4.70 | 4.91 | 4.28 |
| BCAN               | 4.70 | 5.02 | 4.44 |
| BCAM               | 4.70 | 5.61 | 4.00 |
| ZBTB39             | 4.70 | 5.08 | 4.08 |
| SHISA8             | 4.70 | 5.03 | 4.36 |
| NKD2               | 4.70 | 5.03 | 4.43 |
| TRIM15             | 4.70 | 4.96 | 4.36 |
| TMEM123            | 4.70 | 4.94 | 4.41 |

|                    |      |      |      |
|--------------------|------|------|------|
| WIPF3              | 4.70 | 5.27 | 4.32 |
| ACSL5              | 4.70 | 5.19 | 3.86 |
| OTTHUMG00000171900 | 4.70 | 5.22 | 4.07 |
| LINC00602          | 4.70 | 5.12 | 4.33 |
| STK40              | 4.70 | 5.05 | 4.44 |
| COL8A1             | 4.70 | 6.00 | 3.45 |
| C10orf71           | 4.70 | 5.25 | 4.12 |
| LOC100294362       | 4.70 | 5.14 | 4.38 |
| C1orf112           | 4.70 | 4.93 | 4.47 |
| LOC100996669       | 4.70 | 5.41 | 4.28 |
| DEFB116            | 4.70 | 5.64 | 3.90 |
| THEM6              | 4.70 | 4.88 | 4.36 |
| JPH2               | 4.70 | 5.04 | 4.33 |
| TRMT61B            | 4.70 | 5.44 | 4.12 |
| CPN1               | 4.70 | 5.15 | 4.09 |
| HOXB-AS3           | 4.70 | 4.98 | 4.42 |
| DENND1B            | 4.70 | 5.09 | 4.28 |
| CRYBA2             | 4.70 | 5.15 | 4.32 |
| MAP2K3             | 4.70 | 5.04 | 4.51 |
| LOC339524          | 4.70 | 5.18 | 4.11 |
| C1orf116           | 4.70 | 5.19 | 4.19 |
| TSPY1              | 4.70 | 5.25 | 4.13 |
| TMEM161B-AS1       | 4.70 | 5.07 | 4.34 |
| FGF1               | 4.70 | 5.20 | 4.25 |
| SPSB2              | 4.70 | 5.01 | 4.34 |
| C9orf84            | 4.70 | 5.02 | 4.41 |
| GDF2               | 4.70 | 5.29 | 4.12 |
| PXN-AS1            | 4.70 | 4.92 | 4.39 |
| OTTHUMG00000162467 | 4.70 | 4.98 | 4.31 |
| ANO10              | 4.70 | 5.06 | 4.23 |
| EIF1B              | 4.70 | 5.01 | 4.33 |
| SBK1               | 4.70 | 5.15 | 4.22 |
| AMOT               | 4.70 | 4.99 | 4.39 |
| UNQ6494            | 4.70 | 5.01 | 4.19 |
| APOC1              | 4.70 | 7.27 | 3.24 |
| ICOSLG             | 4.70 | 5.07 | 4.29 |
| OTTHUMG00000162476 | 4.70 | 5.17 | 3.72 |
| LINC00035          | 4.70 | 5.14 | 4.22 |
| CD200              | 4.70 | 5.22 | 3.71 |
| C6orf47            | 4.70 | 5.08 | 4.21 |
| ZNF583             | 4.70 | 4.94 | 4.27 |
| KLHL6              | 4.70 | 5.08 | 4.30 |
| CHCHD6             | 4.70 | 4.93 | 4.37 |
| NEDD4L             | 4.70 | 5.25 | 4.33 |
| DOLK               | 4.70 | 5.46 | 4.24 |
| OTTHUMG00000166972 | 4.70 | 5.08 | 4.22 |
| LOC100653005       | 4.69 | 5.20 | 4.31 |
| LAMA3              | 4.69 | 5.19 | 4.37 |
| ACBD4              | 4.69 | 4.97 | 4.43 |

|                    |      |      |      |
|--------------------|------|------|------|
| OTTHUMG00000161934 | 4.69 | 5.03 | 4.41 |
| PDE2A              | 4.69 | 5.17 | 4.23 |
| DRAM1              | 4.69 | 5.07 | 4.17 |
| TG                 | 4.69 | 5.07 | 4.45 |
| SNORD114-3         | 4.69 | 7.07 | 2.74 |
| FAM227A            | 4.69 | 5.04 | 4.14 |
| MYOT               | 4.69 | 5.13 | 4.15 |
| LRRC34             | 4.69 | 5.18 | 4.15 |
| OTTHUMG00000165450 | 4.69 | 5.35 | 3.90 |
| CCDC136            | 4.69 | 4.97 | 4.27 |
| MIR1180            | 4.69 | 5.22 | 4.05 |
| PGCP1              | 4.69 | 5.15 | 4.22 |
| ANKRD35            | 4.69 | 4.96 | 4.53 |
| OR7E14P            | 4.69 | 5.10 | 4.08 |
| ITCH-IT1           | 4.69 | 4.88 | 4.30 |
| RHPN2              | 4.69 | 5.08 | 4.45 |
| KRTAP5-2           | 4.69 | 5.26 | 3.97 |
| KRT79              | 4.69 | 5.46 | 4.14 |
| FAM83H             | 4.69 | 5.17 | 4.28 |
| ODF3L1             | 4.69 | 4.89 | 4.47 |
| OTTHUMG00000162005 | 4.69 | 5.77 | 3.95 |
| NDUFA5             | 4.69 | 5.05 | 4.21 |
| TCTEX1D4           | 4.69 | 5.53 | 3.88 |
| OTTHUMG00000008038 | 4.69 | 5.20 | 4.23 |
| BEND6              | 4.69 | 5.98 | 4.05 |
| CANT1              | 4.69 | 5.02 | 4.01 |
| CD79B              | 4.69 | 5.24 | 4.36 |
| TXNRD2             | 4.69 | 4.88 | 4.41 |
| GRID1              | 4.69 | 4.96 | 4.36 |
| ZNF688             | 4.69 | 5.06 | 4.39 |
| ALDH1L1            | 4.69 | 5.21 | 4.42 |
| OR5B17             | 4.69 | 5.57 | 4.04 |
| HMX3               | 4.69 | 5.24 | 4.09 |
| ANKLE1             | 4.69 | 5.14 | 4.27 |
| ANKS6              | 4.69 | 4.99 | 4.38 |
| VWA3A              | 4.69 | 5.10 | 4.24 |
| USP20              | 4.69 | 5.07 | 4.30 |
| MIR654             | 4.69 | 5.35 | 3.78 |
| NPNT               | 4.69 | 5.12 | 4.07 |
| PSMA6              | 4.69 | 5.15 | 4.35 |
| TULP1              | 4.69 | 5.11 | 4.45 |
| CST8               | 4.69 | 4.90 | 4.14 |
| LOC400943          | 4.69 | 4.98 | 4.37 |
| KIAA1324           | 4.69 | 5.30 | 4.11 |
| FLJ11235           | 4.69 | 5.35 | 4.04 |
| OTTHUMG00000169280 | 4.69 | 5.29 | 4.04 |
| ASCL1              | 4.69 | 5.14 | 4.21 |
| RANBP17            | 4.69 | 4.87 | 4.19 |
| SNORD59B           | 4.69 | 5.56 | 3.65 |

|                    |      |      |      |
|--------------------|------|------|------|
| CD226              | 4.69 | 5.33 | 4.13 |
| CECR1              | 4.69 | 5.63 | 4.27 |
| IRF6               | 4.69 | 5.13 | 4.39 |
| SYP-AS1            | 4.69 | 5.15 | 4.38 |
| CHRD               | 4.69 | 5.19 | 4.48 |
| GPR182             | 4.69 | 5.17 | 4.41 |
| RNASEL             | 4.69 | 5.35 | 3.84 |
| ZNF503-AS2         | 4.69 | 5.30 | 4.34 |
| OTTHUMG00000168297 | 4.69 | 5.05 | 4.11 |
| LOC643441          | 4.69 | 5.20 | 4.21 |
| DUSP13             | 4.69 | 5.02 | 4.36 |
| MAP3K14            | 4.69 | 5.17 | 4.38 |
| PITPNM1            | 4.69 | 4.97 | 4.32 |
| THRSP              | 4.69 | 5.78 | 3.77 |
| OR7G2              | 4.69 | 5.03 | 4.45 |
| AK8                | 4.69 | 4.95 | 4.42 |
| FAM83A             | 4.69 | 5.18 | 4.39 |
| AGAP2              | 4.69 | 5.04 | 4.24 |
| DHRS4              | 4.69 | 5.26 | 4.23 |
| MIR4258            | 4.69 | 6.23 | 3.99 |
| GPR161             | 4.69 | 5.05 | 4.43 |
| TREML2             | 4.69 | 5.31 | 4.27 |
| NCAPH              | 4.69 | 5.14 | 4.40 |
| TMEM72             | 4.69 | 5.34 | 4.36 |
| LOC101060264       | 4.69 | 5.22 | 4.30 |
| ADAM8              | 4.69 | 5.00 | 4.26 |
| LYG2               | 4.69 | 4.89 | 4.08 |
| LOC100288570       | 4.69 | 5.80 | 4.10 |
| KIAA1524           | 4.69 | 5.29 | 4.19 |
| PRR18              | 4.69 | 4.91 | 4.31 |
| LINC00304          | 4.68 | 5.03 | 4.33 |
| SSX4               | 4.68 | 5.35 | 4.13 |
| IGSF21             | 4.68 | 5.00 | 4.30 |
| KRT82              | 4.68 | 5.26 | 4.19 |
| MKNK1-AS1          | 4.68 | 5.12 | 4.14 |
| RNA5SP364          | 4.68 | 5.31 | 4.10 |
| ORAOV1             | 4.68 | 5.45 | 4.09 |
| PPP2R3C            | 4.68 | 5.17 | 4.08 |
| ADAMTSL5           | 4.68 | 5.38 | 4.12 |
| NDP-AS1            | 4.68 | 4.94 | 4.40 |
| ZCCHC24            | 4.68 | 5.12 | 4.26 |
| LOC644093          | 4.68 | 5.00 | 4.21 |
| GAB4               | 4.68 | 5.25 | 4.38 |
| FER1L6             | 4.68 | 5.10 | 4.42 |
| TCHHL1             | 4.68 | 4.96 | 4.36 |
| GRAMD2             | 4.68 | 4.98 | 4.20 |
| NXF3               | 4.68 | 5.09 | 4.03 |
| MYO7A              | 4.68 | 5.06 | 4.21 |
| TRIM46             | 4.68 | 4.89 | 4.40 |



|                    |      |      |      |
|--------------------|------|------|------|
| LOC284865          | 4.68 | 5.49 | 3.95 |
| BZRAP1-AS1         | 4.68 | 4.89 | 4.48 |
| MRPS12             | 4.68 | 5.16 | 4.35 |
| OTTHUMG00000160654 | 4.68 | 5.01 | 4.28 |
| TPRX1              | 4.68 | 5.23 | 4.06 |
| ISL2               | 4.68 | 5.30 | 4.27 |
| H2AFY2             | 4.68 | 4.98 | 4.39 |
| TMPRSS5            | 4.68 | 5.23 | 4.45 |
| PNKD               | 4.68 | 5.18 | 4.24 |
| LOC285033          | 4.68 | 4.97 | 4.22 |
| C1orf147           | 4.68 | 5.13 | 4.22 |
| TTF1               | 4.68 | 5.09 | 4.36 |
| FGFBP3             | 4.68 | 4.93 | 4.28 |
| FAM117A            | 4.68 | 5.28 | 3.92 |
| MAS1L              | 4.68 | 5.51 | 4.09 |
| MYO5B              | 4.68 | 5.00 | 4.27 |
| AP4S1              | 4.68 | 4.94 | 4.29 |
| RFPL2              | 4.68 | 5.04 | 4.24 |
| KRTAP26-1          | 4.68 | 5.41 | 3.90 |
| CHST14             | 4.68 | 5.38 | 3.77 |
| OTTHUMG00000169985 | 4.68 | 5.16 | 4.28 |
| INTS6-AS1          | 4.68 | 4.89 | 4.36 |
| KBTBD11            | 4.68 | 4.96 | 4.40 |
| MFSD6L             | 4.68 | 5.23 | 4.32 |
| AMER3              | 4.68 | 5.02 | 4.49 |
| TSTD2              | 4.68 | 5.58 | 4.21 |
| TAF1               | 4.68 | 5.22 | 4.21 |
| OTTHUMG00000164286 | 4.68 | 4.93 | 4.50 |
| OR3A1              | 4.68 | 5.16 | 4.10 |
| WSCD1              | 4.68 | 5.02 | 4.37 |
| VANGL1             | 4.68 | 5.40 | 4.33 |
| MAGEA3             | 4.68 | 5.61 | 4.08 |
| IGSF23             | 4.68 | 5.24 | 4.44 |
| ANKRD34A           | 4.68 | 5.17 | 4.15 |
| ACAD8              | 4.68 | 4.99 | 4.53 |
| OTTHUMG00000165937 | 4.68 | 5.15 | 3.95 |
| CEACAM1            | 4.68 | 5.28 | 4.21 |
| SNORA77            | 4.68 | 5.01 | 4.37 |
| SLC8A2             | 4.68 | 5.02 | 4.12 |
| ITGB2              | 4.68 | 4.79 | 4.35 |
| PLEKHA2            | 4.68 | 5.26 | 4.21 |
| CORIN              | 4.68 | 4.98 | 3.88 |
| PDZD7              | 4.68 | 5.04 | 4.16 |
| SHBG               | 4.68 | 5.02 | 4.33 |
| GLDC               | 4.68 | 4.90 | 4.42 |
| PCDHB6             | 4.68 | 5.35 | 3.45 |
| NAT8B              | 4.68 | 5.03 | 4.42 |
| NUDT22             | 4.68 | 5.35 | 4.25 |
| CLSPN              | 4.68 | 5.03 | 4.08 |

|                     |      |      |      |
|---------------------|------|------|------|
| TSC22D4             | 4.68 | 5.29 | 4.17 |
| OTTHUMG00000013230  | 4.68 | 5.10 | 3.89 |
| AQP12A              | 4.68 | 5.15 | 3.65 |
| DPPA2P3             | 4.68 | 5.03 | 4.17 |
| LOC100129869        | 4.68 | 5.29 | 4.37 |
| LOC729970           | 4.68 | 5.12 | 3.99 |
| PLA2G4D             | 4.68 | 5.15 | 4.29 |
| EPHB1               | 4.68 | 5.27 | 4.04 |
| MRPL18              | 4.68 | 5.22 | 4.11 |
| DSC3                | 4.68 | 5.56 | 3.87 |
| LOC100130373        | 4.68 | 5.13 | 3.98 |
| MAGEB6              | 4.68 | 5.07 | 4.02 |
| LOC400622           | 4.68 | 5.00 | 4.33 |
| FAM181A-AS1         | 4.67 | 5.08 | 3.93 |
| MGC13053            | 4.67 | 5.16 | 4.20 |
| SNORD83B            | 4.67 | 4.83 | 4.57 |
| C12orf76            | 4.67 | 5.02 | 4.16 |
| OTTHUMG00000013747  | 4.67 | 4.95 | 4.26 |
| RNF215              | 4.67 | 4.89 | 4.44 |
| LOC100289424        | 4.67 | 5.33 | 4.05 |
| ZNF124              | 4.67 | 5.04 | 3.94 |
| ZNF555              | 4.67 | 5.05 | 4.38 |
| OTTHUMG000000156274 | 4.67 | 5.08 | 4.15 |
| LILRB3              | 4.67 | 4.96 | 4.35 |
| NSF                 | 4.67 | 5.15 | 3.95 |
| LINC00488           | 4.67 | 5.35 | 4.23 |
| CYP2F1              | 4.67 | 5.05 | 4.33 |
| VPS72               | 4.67 | 5.31 | 4.24 |
| CACNA1C-AS1         | 4.67 | 5.04 | 4.08 |
| DRAXIN              | 4.67 | 4.90 | 4.25 |
| LOC100287329        | 4.67 | 5.24 | 4.35 |
| MPND                | 4.67 | 5.08 | 4.32 |
| ERAS                | 4.67 | 5.04 | 4.40 |
| XXYLT1              | 4.67 | 4.99 | 4.15 |
| LOC100127983        | 4.67 | 5.16 | 3.95 |
| BAI2                | 4.67 | 5.27 | 4.17 |
| YJEFN3              | 4.67 | 5.11 | 4.13 |
| HELZ2               | 4.67 | 4.94 | 4.32 |
| TRBV7-1             | 4.67 | 5.10 | 4.15 |
| NMRK1               | 4.67 | 5.33 | 4.29 |
| ALDH9A1             | 4.67 | 4.93 | 4.09 |
| PBX3                | 4.67 | 5.12 | 4.16 |
| SLC29A4             | 4.67 | 5.06 | 3.95 |
| MYO15A              | 4.67 | 4.86 | 4.49 |
| OTTHUMG000000168876 | 4.67 | 5.36 | 4.17 |
| C2orf78             | 4.67 | 5.10 | 4.13 |
| CMYA5               | 4.67 | 5.03 | 4.25 |
| MNDA                | 4.67 | 5.88 | 3.93 |
| GLB1L3              | 4.67 | 5.09 | 4.01 |

|                           |      |      |      |
|---------------------------|------|------|------|
| <i>RIC3</i>               | 4.67 | 5.00 | 4.23 |
| <i>RUNDC3A</i>            | 4.67 | 4.99 | 4.13 |
| <i>CLIC3</i>              | 4.67 | 5.09 | 4.28 |
| <i>C2orf91</i>            | 4.67 | 5.23 | 4.30 |
| <i>MIR155</i>             | 4.67 | 4.91 | 4.33 |
| <i>LINC00908</i>          | 4.67 | 5.02 | 4.43 |
| <i>NSMF</i>               | 4.67 | 5.03 | 4.28 |
| <i>CCDC87</i>             | 4.67 | 4.86 | 4.50 |
| <i>LOC100507547</i>       | 4.67 | 5.02 | 4.50 |
| <i>B3GALTL</i>            | 4.67 | 5.32 | 3.57 |
| <i>BANK1</i>              | 4.67 | 5.35 | 3.49 |
| <i>MOCS1</i>              | 4.67 | 4.96 | 4.39 |
| <i>POLL</i>               | 4.67 | 4.98 | 4.36 |
| <i>ZNF527</i>             | 4.67 | 4.96 | 4.06 |
| <i>OTTHUMG00000003685</i> | 4.67 | 5.61 | 4.34 |
| <i>CTNND2</i>             | 4.67 | 5.25 | 4.18 |
| <i>OTTHUMG00000032678</i> | 4.67 | 5.17 | 3.95 |
| <i>ZNF845</i>             | 4.67 | 5.51 | 3.72 |
| <i>OBSCN</i>              | 4.67 | 4.96 | 4.52 |
| <i>DPEP1</i>              | 4.67 | 5.09 | 4.27 |
| <i>ITGA7</i>              | 4.67 | 5.24 | 4.29 |
| <i>LOC100507530</i>       | 4.67 | 5.01 | 4.31 |
| <i>IGLV3-12</i>           | 4.67 | 5.00 | 4.03 |
| <i>LEPREL1-AS1</i>        | 4.67 | 4.99 | 3.99 |
| <i>LOC100506834</i>       | 4.67 | 4.99 | 4.37 |
| <i>SEC61A2</i>            | 4.67 | 5.05 | 4.09 |
| <i>PHF16</i>              | 4.67 | 5.33 | 3.73 |
| <i>OPN1LW</i>             | 4.67 | 5.50 | 3.79 |
| <i>TMEM62</i>             | 4.67 | 4.98 | 4.32 |
| <i>HEXIM2</i>             | 4.67 | 5.04 | 4.39 |
| <i>DUSP28</i>             | 4.67 | 4.94 | 4.37 |
| <i>CPXM2</i>              | 4.67 | 5.25 | 4.09 |
| <i>KL</i>                 | 4.67 | 5.18 | 4.24 |
| <i>PTPRH</i>              | 4.67 | 4.97 | 4.42 |
| <i>MIR1234</i>            | 4.67 | 5.22 | 3.88 |
| <i>OR2T5</i>              | 4.67 | 5.13 | 4.02 |
| <i>LOC100130480</i>       | 4.67 | 5.12 | 4.37 |
| <i>TFR2</i>               | 4.67 | 5.13 | 4.48 |
| <i>RPSAP52</i>            | 4.67 | 5.37 | 3.66 |
| <i>LOC100507425</i>       | 4.67 | 5.16 | 4.18 |
| <i>APLP1</i>              | 4.67 | 5.22 | 4.18 |
| <i>ATP8B4</i>             | 4.67 | 5.37 | 4.26 |
| <i>TSPY3</i>              | 4.67 | 5.31 | 3.91 |
| <i>OSR2</i>               | 4.67 | 5.18 | 3.92 |
| <i>SNRK</i>               | 4.67 | 5.11 | 4.15 |
| <i>OTTHUMG00000171098</i> | 4.67 | 5.29 | 3.90 |
| <i>SLC36A2</i>            | 4.67 | 4.95 | 4.18 |
| <i>OR7A10</i>             | 4.67 | 5.25 | 3.87 |
| <i>OR2A42</i>             | 4.67 | 5.20 | 3.98 |

|                    |      |      |      |
|--------------------|------|------|------|
| CELF5              | 4.66 | 5.09 | 4.32 |
| FBXO24             | 4.66 | 5.07 | 4.23 |
| PDZD4              | 4.66 | 4.87 | 4.30 |
| CERS4              | 4.66 | 5.16 | 4.28 |
| LOC100132481       | 4.66 | 5.24 | 4.13 |
| OTTHUMG00000140137 | 4.66 | 5.25 | 4.31 |
| C18orf54           | 4.66 | 5.38 | 3.90 |
| MCF2L              | 4.66 | 4.98 | 4.30 |
| WDR85              | 4.66 | 4.94 | 4.49 |
| NHEG1              | 4.66 | 4.97 | 4.49 |
| MRAP               | 4.66 | 4.85 | 4.37 |
| OTTHUMG00000159250 | 4.66 | 5.50 | 4.16 |
| NEU4               | 4.66 | 4.98 | 4.34 |
| XRCC4              | 4.66 | 5.37 | 3.58 |
| TRBV25OR9-2        | 4.66 | 5.04 | 4.46 |
| TEC                | 4.66 | 5.36 | 4.24 |
| OTUB2              | 4.66 | 4.93 | 4.30 |
| ADRA1B             | 4.66 | 4.93 | 4.34 |
| SRRM5              | 4.66 | 4.91 | 4.13 |
| STAG3              | 4.66 | 5.02 | 4.18 |
| PAK3               | 4.66 | 4.84 | 4.43 |
| ASTN2              | 4.66 | 4.88 | 4.52 |
| VPS33A             | 4.66 | 4.99 | 4.34 |
| GIPR               | 4.66 | 4.96 | 4.35 |
| TRAJ45             | 4.66 | 5.56 | 3.48 |
| TAS2R30            | 4.66 | 5.08 | 4.22 |
| KCNH2              | 4.66 | 4.99 | 4.09 |
| OTTHUMG00000018929 | 4.66 | 5.01 | 4.04 |
| LGALS2             | 4.66 | 4.96 | 4.39 |
| C8orf4             | 4.66 | 5.34 | 3.87 |
| GDAP1L1            | 4.66 | 4.90 | 4.43 |
| BMS1P4             | 4.66 | 5.50 | 3.90 |
| ITLN1              | 4.66 | 5.58 | 3.99 |
| KRTAP21-1          | 4.66 | 5.38 | 3.56 |
| CETP               | 4.66 | 5.00 | 4.25 |
| USP50              | 4.66 | 5.22 | 3.90 |
| TMEM44-AS1         | 4.66 | 4.86 | 4.35 |
| SKI                | 4.66 | 5.20 | 4.26 |
| MGC39372           | 4.66 | 5.61 | 4.09 |
| LCORL              | 4.66 | 5.04 | 4.40 |
| SETD4              | 4.66 | 4.90 | 4.36 |
| OTTHUMG00000017541 | 4.66 | 5.27 | 4.26 |
| MIR449A            | 4.66 | 5.99 | 3.52 |
| LCE1C              | 4.66 | 5.09 | 4.17 |
| ANKRD49            | 4.66 | 5.02 | 4.00 |
| KNCN               | 4.66 | 4.96 | 4.35 |
| B3GAT1             | 4.66 | 5.18 | 4.27 |
| NUP210L            | 4.66 | 5.28 | 4.24 |
| OTTHUMG00000170272 | 4.66 | 5.10 | 4.01 |

|                    |      |      |      |
|--------------------|------|------|------|
| TAF6L              | 4.66 | 5.01 | 4.27 |
| CNKSR1             | 4.66 | 5.21 | 4.34 |
| SLC39A10           | 4.66 | 5.22 | 4.02 |
| SDCCAG3            | 4.66 | 5.30 | 4.17 |
| VSTM2B             | 4.66 | 5.13 | 4.46 |
| MAPK10             | 4.66 | 5.14 | 3.54 |
| AKNAD1             | 4.66 | 5.50 | 4.16 |
| NLGN3              | 4.66 | 4.89 | 4.39 |
| SGSM2              | 4.66 | 5.23 | 4.01 |
| NOVA2              | 4.66 | 5.15 | 4.08 |
| TMEM182            | 4.66 | 5.19 | 4.17 |
| FEZF1              | 4.66 | 5.46 | 4.29 |
| SH3RF2             | 4.66 | 5.11 | 4.39 |
| ADAMTS18           | 4.66 | 4.97 | 4.37 |
| IL32               | 4.66 | 5.00 | 4.07 |
| OTTHUMG00000020301 | 4.66 | 5.00 | 4.13 |
| HOXB7              | 4.66 | 5.00 | 4.32 |
| LOC100130880       | 4.66 | 5.19 | 4.18 |
| ATP6AP1L           | 4.66 | 5.07 | 4.22 |
| CC2D1A             | 4.66 | 5.08 | 4.37 |
| OR2A4              | 4.66 | 5.14 | 4.28 |
| SLC22A15           | 4.66 | 4.90 | 4.23 |
| PSPN               | 4.66 | 5.13 | 3.85 |
| OTTHUMG00000179676 | 4.66 | 5.12 | 4.17 |
| PAK4               | 4.66 | 5.16 | 4.28 |
| VTRNA2-1           | 4.66 | 5.16 | 4.09 |
| PLD6               | 4.66 | 5.19 | 4.16 |
| CPN2               | 4.66 | 5.30 | 4.15 |
| ABCG1              | 4.66 | 5.20 | 4.07 |
| ADCK1              | 4.66 | 5.09 | 4.34 |
| CNGB1              | 4.66 | 4.97 | 4.28 |
| CSK                | 4.66 | 4.96 | 4.21 |
| TRIM61             | 4.66 | 5.04 | 4.35 |
| ZNF709             | 4.66 | 5.04 | 4.26 |
| PSMB11             | 4.66 | 5.00 | 4.36 |
| CCNF               | 4.66 | 4.92 | 4.36 |
| LOC100129455       | 4.66 | 4.94 | 4.31 |
| ZCCHC23            | 4.66 | 4.83 | 4.20 |
| OTTHUMG00000164827 | 4.66 | 5.18 | 4.31 |
| TRAJ43             | 4.66 | 5.18 | 4.16 |
| LIN52              | 4.66 | 5.22 | 4.32 |
| DNAJB8             | 4.66 | 5.13 | 4.30 |
| CDH26              | 4.66 | 5.03 | 4.41 |
| OTTHUMG00000153714 | 4.66 | 4.97 | 4.19 |
| CCL25              | 4.66 | 4.76 | 4.50 |
| SLC17A8            | 4.65 | 5.15 | 4.03 |
| LINC00421          | 4.65 | 5.17 | 4.19 |
| HNRNPCP5           | 4.65 | 5.16 | 4.12 |
| LRRC2-AS1          | 4.65 | 5.06 | 4.19 |

|                    |      |      |      |
|--------------------|------|------|------|
| CLN8               | 4.65 | 5.09 | 4.17 |
| PRR5L              | 4.65 | 5.05 | 4.36 |
| C7orf31            | 4.65 | 5.30 | 4.31 |
| AP1AR              | 4.65 | 4.98 | 4.21 |
| GPR173             | 4.65 | 4.99 | 4.45 |
| C20orf144          | 4.65 | 4.92 | 4.21 |
| MSI1               | 4.65 | 4.97 | 4.32 |
| GJB6               | 4.65 | 5.18 | 4.11 |
| ARNT2              | 4.65 | 4.91 | 4.28 |
| LRFN1              | 4.65 | 4.97 | 4.44 |
| PVRL4              | 4.65 | 5.00 | 4.39 |
| ZCCHC16            | 4.65 | 4.89 | 4.43 |
| YBX3P1             | 4.65 | 5.49 | 4.06 |
| CRABP2             | 4.65 | 5.53 | 3.65 |
| HTR3C              | 4.65 | 5.41 | 4.18 |
| LAMTOR5-AS1        | 4.65 | 4.93 | 4.41 |
| VEPH1              | 4.65 | 5.16 | 4.13 |
| PTGES2-AS1         | 4.65 | 4.95 | 4.25 |
| CCL28              | 4.65 | 5.11 | 4.26 |
| SLC5A12            | 4.65 | 4.96 | 4.37 |
| ZCCHC4             | 4.65 | 4.87 | 4.28 |
| RAB15              | 4.65 | 5.23 | 4.17 |
| LOC339760          | 4.65 | 4.96 | 4.30 |
| HRASLS5            | 4.65 | 4.96 | 4.24 |
| LEFTY2             | 4.65 | 5.03 | 3.94 |
| FLJ25694           | 4.65 | 5.79 | 4.17 |
| MARCKSL1           | 4.65 | 5.07 | 4.36 |
| UBE2M              | 4.65 | 5.40 | 4.29 |
| CABP7              | 4.65 | 5.12 | 3.85 |
| RAD18              | 4.65 | 5.06 | 4.27 |
| ATP5L2             | 4.65 | 5.08 | 4.32 |
| SOX13              | 4.65 | 4.97 | 4.31 |
| LINC00870          | 4.65 | 4.95 | 4.51 |
| OTTHUMG00000153029 | 4.65 | 5.42 | 3.99 |
| CXCR2              | 4.65 | 5.26 | 4.08 |
| RBMY1E             | 4.65 | 5.81 | 3.55 |
| C14orf142          | 4.65 | 5.00 | 4.37 |
| LOC100652770       | 4.65 | 5.07 | 4.14 |
| SLC13A3            | 4.65 | 5.01 | 4.27 |
| LRTOMT             | 4.65 | 5.05 | 4.34 |
| ARHGAP22           | 4.65 | 5.20 | 4.18 |
| OTTHUMG00000002707 | 4.65 | 5.20 | 4.04 |
| UROC1              | 4.65 | 4.93 | 4.44 |
| ZNF140             | 4.65 | 5.19 | 3.97 |
| PFN3               | 4.65 | 5.01 | 4.25 |
| NGF                | 4.65 | 6.29 | 3.95 |
| SPACA4             | 4.65 | 5.21 | 4.06 |
| DMD                | 4.65 | 4.97 | 4.30 |
| MIR4757            | 4.65 | 5.31 | 3.89 |

|                    |      |      |      |
|--------------------|------|------|------|
| ZNF91              | 4.65 | 5.55 | 4.30 |
| GPR45              | 4.65 | 5.02 | 4.33 |
| OTTHUMG00000164273 | 4.65 | 5.19 | 3.95 |
| SLC6A1             | 4.65 | 5.03 | 4.32 |
| LOC100134391       | 4.65 | 4.96 | 4.35 |
| LOC100506691       | 4.65 | 5.08 | 4.11 |
| MIR4746            | 4.65 | 5.40 | 3.93 |
| SLC51B             | 4.65 | 4.98 | 4.17 |
| HOXD-AS1           | 4.65 | 4.86 | 4.37 |
| HMG20B             | 4.65 | 5.15 | 4.30 |
| MST1L              | 4.65 | 5.58 | 4.14 |
| PSG2               | 4.65 | 5.49 | 4.24 |
| SYCE1              | 4.65 | 5.14 | 4.18 |
| EMID1              | 4.65 | 5.30 | 4.27 |
| OTTHUMG00000159353 | 4.65 | 5.14 | 4.21 |
| COL17A1            | 4.65 | 5.03 | 4.26 |
| FOXN3-AS2          | 4.65 | 4.91 | 4.20 |
| OTTHUMG00000151821 | 4.65 | 5.16 | 4.36 |
| SUGT1P1            | 4.65 | 5.27 | 4.28 |
| COMMD10            | 4.64 | 5.01 | 4.37 |
| FAM166A            | 4.64 | 5.08 | 4.43 |
| ALX4               | 4.64 | 5.21 | 3.97 |
| CHP1               | 4.64 | 5.03 | 4.30 |
| ACAD10             | 4.64 | 4.84 | 4.34 |
| GPR158-AS1         | 4.64 | 5.10 | 4.16 |
| GALR3              | 4.64 | 5.60 | 4.24 |
| MORC2-AS1          | 4.64 | 5.09 | 4.23 |
| ZFP82              | 4.64 | 5.09 | 4.18 |
| LOC284600          | 4.64 | 5.13 | 4.12 |
| C7orf63            | 4.64 | 5.24 | 3.80 |
| S100Z              | 4.64 | 5.19 | 4.20 |
| PIGF               | 4.64 | 5.24 | 3.84 |
| BCL2L13            | 4.64 | 4.99 | 4.33 |
| LOC100129046       | 4.64 | 5.31 | 4.06 |
| PCA3               | 4.64 | 5.11 | 4.30 |
| PMS2               | 4.64 | 5.12 | 3.72 |
| GPR156             | 4.64 | 4.94 | 4.32 |
| LOC100131131       | 4.64 | 5.28 | 4.28 |
| OTTHUMG00000163231 | 4.64 | 5.05 | 4.19 |
| RIPK3              | 4.64 | 5.18 | 4.19 |
| TP53TG5            | 4.64 | 5.01 | 3.97 |
| CXADRP2            | 4.64 | 5.50 | 3.85 |
| THNSL1             | 4.64 | 4.97 | 4.37 |
| CLEC14A            | 4.64 | 5.56 | 4.07 |
| LOC100652894       | 4.64 | 4.81 | 4.44 |
| FP2234             | 4.64 | 5.02 | 4.06 |
| CLUH               | 4.64 | 5.05 | 4.04 |
| OTTHUMG00000170339 | 4.64 | 5.50 | 3.88 |
| CMTM8              | 4.64 | 5.22 | 4.27 |

|                    |      |      |      |
|--------------------|------|------|------|
| EML2               | 4.64 | 4.96 | 4.22 |
| ARHGAP25           | 4.64 | 5.03 | 4.20 |
| BTC                | 4.64 | 5.66 | 3.86 |
| NOM1               | 4.64 | 5.14 | 4.36 |
| EXTL3              | 4.64 | 4.95 | 4.19 |
| OTTHUMG00000020273 | 4.64 | 5.10 | 4.12 |
| FBXO48             | 4.64 | 5.19 | 4.10 |
| MIF4GD             | 4.64 | 5.00 | 4.18 |
| LINC00237          | 4.64 | 5.22 | 4.38 |
| LINC00349          | 4.64 | 5.08 | 3.88 |
| ZMYND10            | 4.64 | 4.89 | 4.34 |
| LINC00887          | 4.64 | 5.20 | 4.21 |
| LINC00460          | 4.64 | 4.88 | 4.01 |
| OTUD1              | 4.64 | 5.26 | 3.66 |
| ERMAP              | 4.64 | 4.83 | 4.45 |
| NPFFR1             | 4.64 | 5.07 | 4.06 |
| ZNF678             | 4.64 | 5.16 | 3.94 |
| BTF3L4             | 4.64 | 5.07 | 4.18 |
| SHB                | 4.64 | 5.56 | 4.26 |
| AAGAB              | 4.64 | 5.06 | 4.29 |
| ZNF185             | 4.64 | 5.07 | 4.01 |
| SLC5A5             | 4.64 | 5.01 | 4.12 |
| PPP1R26-AS1        | 4.64 | 5.08 | 4.19 |
| ETV3L              | 4.64 | 5.25 | 4.37 |
| PRMT1              | 4.64 | 5.15 | 4.27 |
| NUDCD1             | 4.64 | 4.93 | 4.37 |
| OTTHUMG00000152852 | 4.64 | 5.29 | 4.16 |
| FAM183A            | 4.64 | 5.27 | 3.87 |
| COBL               | 4.64 | 5.08 | 4.35 |
| RELL2              | 4.64 | 4.89 | 4.34 |
| TMCO4              | 4.64 | 5.06 | 4.19 |
| OTTHUMG00000172124 | 4.64 | 5.39 | 4.01 |
| TRIM29             | 4.64 | 4.89 | 4.43 |
| C1orf115           | 4.64 | 5.10 | 4.26 |
| OTTHUMG00000150805 | 4.64 | 5.10 | 4.24 |
| IFNA5              | 4.64 | 5.55 | 4.04 |
| GPRIN1             | 4.64 | 4.91 | 4.08 |
| FSD1L              | 4.64 | 5.01 | 4.13 |
| PBX4               | 4.64 | 4.98 | 4.37 |
| KIF17              | 4.64 | 4.87 | 4.52 |
| LOC286254          | 4.64 | 4.91 | 4.44 |
| LOC100506007       | 4.64 | 5.02 | 3.97 |
| NT5C1B-RDH14       | 4.64 | 4.85 | 4.28 |
| TMEM158            | 4.64 | 5.56 | 4.20 |
| ZIC2               | 4.64 | 5.29 | 4.17 |
| LOC645638          | 4.64 | 5.52 | 3.81 |
| C19orf44           | 4.64 | 4.90 | 4.28 |
| ACSF2              | 4.64 | 5.05 | 3.99 |
| GABARAPL3          | 4.64 | 4.96 | 4.35 |



|                    |      |      |      |
|--------------------|------|------|------|
| HOXA4              | 4.64 | 5.10 | 4.08 |
| PSCA               | 4.64 | 4.97 | 4.28 |
| MOCOS              | 4.64 | 4.91 | 4.35 |
| ZNF497             | 4.64 | 5.36 | 3.99 |
| LINC00316          | 4.64 | 5.03 | 4.19 |
| PRKCB              | 4.63 | 5.04 | 4.26 |
| OSGEPL1            | 4.63 | 5.38 | 4.11 |
| EPHA4              | 4.63 | 5.17 | 4.25 |
| LINC00898          | 4.63 | 5.31 | 4.32 |
| OR2J2              | 4.63 | 5.11 | 4.12 |
| LRRC37A6P          | 4.63 | 5.11 | 3.61 |
| BICD2              | 4.63 | 5.02 | 4.10 |
| OTTHUMG00000172206 | 4.63 | 5.34 | 3.73 |
| C1orf200           | 4.63 | 5.12 | 3.99 |
| POLA2              | 4.63 | 5.00 | 4.19 |
| GPR171             | 4.63 | 5.00 | 4.26 |
| POGK               | 4.63 | 4.88 | 4.41 |
| OTTHUMG00000016904 | 4.63 | 4.96 | 4.14 |
| CDRT15P2           | 4.63 | 5.21 | 4.06 |
| RASAL2-AS1         | 4.63 | 4.95 | 4.24 |
| ZFP64              | 4.63 | 5.05 | 4.35 |
| PTCSC3             | 4.63 | 5.14 | 4.21 |
| TPST2              | 4.63 | 4.92 | 4.30 |
| OTTHUMG00000019207 | 4.63 | 5.00 | 4.27 |
| ERCC6              | 4.63 | 4.90 | 4.50 |
| TSEN34             | 4.63 | 4.81 | 4.52 |
| SPEG               | 4.63 | 4.85 | 4.20 |
| SIGLEC6            | 4.63 | 5.02 | 4.11 |
| SEC14L4            | 4.63 | 4.99 | 4.20 |
| ASB10              | 4.63 | 4.90 | 4.24 |
| OR9I1              | 4.63 | 5.62 | 4.11 |
| FLVCR2             | 4.63 | 5.14 | 4.35 |
| MZF1               | 4.63 | 4.92 | 4.50 |
| LLGL1              | 4.63 | 4.86 | 4.37 |
| TGFA-IT1           | 4.63 | 5.28 | 4.15 |
| BEGAIN             | 4.63 | 4.98 | 4.11 |
| LOC100506229       | 4.63 | 5.01 | 4.15 |
| HOXA-AS2           | 4.63 | 5.01 | 4.23 |
| PARVG              | 4.63 | 4.94 | 4.43 |
| RNF183             | 4.63 | 5.24 | 4.27 |
| ZNF639             | 4.63 | 5.26 | 4.23 |
| FCAMR              | 4.63 | 5.07 | 4.14 |
| MAGEL2             | 4.63 | 4.98 | 4.38 |
| KCNK18             | 4.63 | 4.92 | 4.17 |
| ZCWPW1             | 4.63 | 5.10 | 4.28 |
| RTN1               | 4.63 | 4.91 | 4.38 |
| RHOBTB2            | 4.63 | 5.14 | 4.24 |
| NR2F6              | 4.63 | 5.12 | 4.24 |
| MIR382             | 4.63 | 5.00 | 4.01 |

|                    |      |      |      |
|--------------------|------|------|------|
| R3HDM4             | 4.63 | 5.00 | 4.42 |
| ABCB9              | 4.63 | 4.95 | 4.22 |
| TSL                | 4.63 | 5.05 | 4.35 |
| PIWIL2             | 4.63 | 5.09 | 4.20 |
| IKBKE              | 4.63 | 4.95 | 3.95 |
| TSTD3              | 4.63 | 5.23 | 3.92 |
| OTTHUMG00000168726 | 4.63 | 5.30 | 4.32 |
| FAIM               | 4.63 | 5.02 | 4.05 |
| TNNI2              | 4.63 | 5.14 | 3.92 |
| TRIM11             | 4.63 | 5.03 | 4.19 |
| OTTHUMG00000170825 | 4.63 | 4.99 | 4.31 |
| SNORA16B           | 4.63 | 5.92 | 3.46 |
| EPB41L4A           | 4.63 | 5.19 | 3.82 |
| PRM2               | 4.63 | 5.21 | 4.20 |
| NANS               | 4.63 | 5.07 | 4.12 |
| OTTHUMG00000164520 | 4.63 | 5.94 | 3.71 |
| POU2F2             | 4.63 | 5.16 | 4.28 |
| C15orf52           | 4.63 | 4.90 | 4.27 |
| IFITM5             | 4.63 | 5.08 | 4.33 |
| RGS6               | 4.63 | 5.12 | 4.27 |
| KCNE1L             | 4.63 | 4.99 | 4.07 |
| PHF2P1             | 4.63 | 5.10 | 4.15 |
| WDR67              | 4.63 | 4.85 | 4.20 |
| SRRM4              | 4.63 | 4.96 | 4.25 |
| RAD54L             | 4.63 | 4.99 | 4.34 |
| NXNL2              | 4.63 | 5.02 | 3.90 |
| PAQR8              | 4.63 | 4.90 | 4.27 |
| MIR4486            | 4.63 | 5.78 | 3.79 |
| FLJ31356           | 4.63 | 5.02 | 4.15 |
| OR6S1              | 4.63 | 5.75 | 4.01 |
| HRH3               | 4.62 | 5.01 | 4.29 |
| LOC150622          | 4.62 | 5.54 | 4.08 |
| OTTHUMG00000037132 | 4.62 | 5.27 | 4.10 |
| OTTHUMG00000018267 | 4.62 | 5.30 | 4.03 |
| ELMO3              | 4.62 | 4.91 | 4.33 |
| H2AFB1             | 4.62 | 4.93 | 4.41 |
| STAC3              | 4.62 | 5.04 | 4.06 |
| TNK1               | 4.62 | 5.35 | 3.99 |
| TSPAN18            | 4.62 | 5.39 | 3.92 |
| MIR93              | 4.62 | 5.06 | 4.02 |
| PLEKHG4            | 4.62 | 4.85 | 4.31 |
| MX2                | 4.62 | 5.33 | 4.11 |
| IL27RA             | 4.62 | 4.92 | 4.34 |
| CCHCR1             | 4.62 | 5.00 | 3.92 |
| MORF4L2-AS1        | 4.62 | 5.28 | 3.87 |
| CMTM5              | 4.62 | 5.26 | 4.31 |
| LOC100134229       | 4.62 | 5.22 | 4.10 |
| LRRC71             | 4.62 | 4.85 | 4.32 |
| LOC100287837       | 4.62 | 4.98 | 4.29 |

|                    |      |      |      |
|--------------------|------|------|------|
| RPL13AP6           | 4.62 | 5.16 | 3.94 |
| OTTHUMG00000155477 | 4.62 | 5.23 | 3.86 |
| MTNR1B             | 4.62 | 5.33 | 4.28 |
| SCARNA20           | 4.62 | 5.33 | 3.79 |
| OTTHUMG00000019462 | 4.62 | 6.82 | 3.19 |
| GPATCH3            | 4.62 | 4.81 | 4.38 |
| RNA5SP394          | 4.62 | 5.29 | 4.15 |
| LOC100144602       | 4.62 | 5.05 | 4.32 |
| FAM71E1            | 4.62 | 5.08 | 4.39 |
| KIAA1211L          | 4.62 | 4.96 | 4.37 |
| ADAMTS16           | 4.62 | 5.01 | 3.88 |
| HOTAIRM1           | 4.62 | 4.96 | 4.31 |
| ECT2               | 4.62 | 5.61 | 3.88 |
| ELL3               | 4.62 | 5.14 | 4.20 |
| LOC100190940       | 4.62 | 5.61 | 4.17 |
| FGGY               | 4.62 | 4.94 | 4.14 |
| PDIK1L             | 4.62 | 5.10 | 4.15 |
| LOXL1-AS1          | 4.62 | 4.95 | 4.22 |
| ZFP28              | 4.62 | 5.20 | 3.98 |
| FRRS1              | 4.62 | 5.06 | 4.29 |
| OTTHUMG00000171672 | 4.62 | 5.18 | 4.26 |
| KIAA1045           | 4.62 | 5.08 | 4.19 |
| LOC728012          | 4.62 | 5.19 | 4.08 |
| PUS7L              | 4.62 | 5.35 | 3.74 |
| GPR65              | 4.62 | 5.24 | 4.09 |
| STOX2              | 4.62 | 5.11 | 4.09 |
| CSF3R              | 4.62 | 5.12 | 4.29 |
| MIR890             | 4.62 | 5.26 | 3.68 |
| IL11               | 4.62 | 5.55 | 3.95 |
| C9orf172           | 4.62 | 5.02 | 4.29 |
| ADRBK2             | 4.62 | 5.54 | 3.92 |
| ENTPD1-AS1         | 4.62 | 4.87 | 4.27 |
| HHLA3              | 4.62 | 4.96 | 4.09 |
| LOC284933          | 4.62 | 5.33 | 4.24 |
| SPTBN4             | 4.62 | 4.79 | 4.28 |
| RAC3               | 4.62 | 5.36 | 4.25 |
| LOC100506631       | 4.62 | 5.02 | 4.04 |
| OR6N2              | 4.62 | 5.17 | 3.79 |
| ARVP6125           | 4.62 | 5.35 | 4.03 |
| PADI4              | 4.62 | 5.02 | 4.20 |
| ITGB7              | 4.62 | 4.94 | 4.36 |
| OTTHUMG00000036405 | 4.62 | 5.13 | 4.19 |
| SLC7A4             | 4.62 | 4.92 | 4.21 |
| STEAP1             | 4.62 | 6.01 | 3.29 |
| FOXP1-AS1          | 4.62 | 5.08 | 4.13 |
| RPS27A             | 4.62 | 4.95 | 4.20 |
| LOC283332          | 4.62 | 5.25 | 4.13 |
| SIGLEC15           | 4.62 | 5.05 | 3.91 |
| LOC100132781       | 4.62 | 5.27 | 4.01 |

|                    |      |      |      |
|--------------------|------|------|------|
| RCC1               | 4.62 | 5.62 | 4.03 |
| GJD2               | 4.62 | 5.05 | 4.19 |
| CCDC176            | 4.62 | 4.98 | 4.08 |
| ANO9               | 4.62 | 5.08 | 4.21 |
| FAM155A            | 4.62 | 4.90 | 3.89 |
| ADAP1              | 4.62 | 5.11 | 4.16 |
| LOC149373          | 4.62 | 5.13 | 4.15 |
| LOC100287313       | 4.62 | 5.38 | 4.05 |
| SSSCA1             | 4.62 | 5.10 | 3.96 |
| VGLL1              | 4.62 | 5.10 | 4.25 |
| KRTAP9-8           | 4.62 | 5.14 | 3.83 |
| ATG10              | 4.62 | 5.02 | 4.15 |
| SFTPC              | 4.62 | 4.83 | 4.26 |
| LOC731282          | 4.62 | 5.08 | 4.40 |
| FAM71E2            | 4.62 | 4.86 | 4.37 |
| HOXC13             | 4.62 | 5.17 | 4.26 |
| SLC9A7             | 4.62 | 5.12 | 4.11 |
| CGB7               | 4.62 | 5.24 | 4.24 |
| ACTRT3             | 4.62 | 5.01 | 4.22 |
| FSD1               | 4.62 | 5.03 | 4.27 |
| OR5D16             | 4.62 | 5.58 | 4.13 |
| FAM65C             | 4.61 | 5.15 | 4.11 |
| PROCA1             | 4.61 | 4.85 | 4.46 |
| TMEM132C           | 4.61 | 4.93 | 4.44 |
| LOC402160          | 4.61 | 4.96 | 4.33 |
| SDR42E2            | 4.61 | 4.99 | 4.06 |
| LIM2               | 4.61 | 5.21 | 4.05 |
| MYCN               | 4.61 | 4.99 | 4.36 |
| PRDM12             | 4.61 | 4.81 | 4.27 |
| GRM5               | 4.61 | 5.05 | 4.21 |
| OTTHUMG00000151781 | 4.61 | 5.06 | 4.04 |
| PCIF1              | 4.61 | 4.92 | 3.95 |
| OTTHUMG00000168211 | 4.61 | 4.87 | 4.32 |
| GNG12-AS1          | 4.61 | 4.86 | 4.36 |
| ZNF543             | 4.61 | 5.07 | 4.09 |
| VAV3               | 4.61 | 5.07 | 4.04 |
| EPHA8              | 4.61 | 4.99 | 4.08 |
| CGRRF1             | 4.61 | 5.28 | 4.25 |
| STMN1              | 4.61 | 5.15 | 3.91 |
| LOC151171          | 4.61 | 5.20 | 3.99 |
| GABRA5             | 4.61 | 5.06 | 4.29 |
| OR4K14             | 4.61 | 5.36 | 4.14 |
| ACOT2              | 4.61 | 5.09 | 3.74 |
| DNAJC24            | 4.61 | 4.88 | 4.14 |
| FAM205A            | 4.61 | 5.05 | 4.00 |
| COX19              | 4.61 | 5.12 | 4.15 |
| MRGPRX2            | 4.61 | 5.22 | 3.88 |
| OTTHUMG00000169765 | 4.61 | 4.97 | 4.07 |
| ACADS              | 4.61 | 4.92 | 4.11 |

|                    |      |      |      |
|--------------------|------|------|------|
| ABCB4              | 4.61 | 5.10 | 4.30 |
| TNFSF9             | 4.61 | 5.00 | 4.06 |
| FLJ40194           | 4.61 | 5.39 | 4.13 |
| SOX6               | 4.61 | 5.00 | 4.22 |
| WDHD1              | 4.61 | 5.48 | 3.88 |
| OTTHUMG00000021439 | 4.61 | 5.14 | 4.03 |
| OTTHUMG00000037030 | 4.61 | 5.11 | 4.27 |
| ZNF442             | 4.61 | 4.85 | 4.15 |
| OTTHUMG00000152890 | 4.61 | 5.26 | 4.24 |
| CES1P1             | 4.61 | 5.02 | 4.15 |
| GRK6               | 4.61 | 4.97 | 4.15 |
| OTTHUMG00000067122 | 4.61 | 5.08 | 4.33 |
| PABPC1P2           | 4.61 | 5.02 | 4.03 |
| SUFU               | 4.61 | 4.94 | 4.32 |
| ROM1               | 4.61 | 5.11 | 4.20 |
| KLC3               | 4.61 | 4.89 | 4.34 |
| KCNT1              | 4.61 | 5.26 | 4.24 |
| LRRC61             | 4.61 | 5.10 | 4.25 |
| OTTHUMG00000151395 | 4.61 | 5.13 | 4.39 |
| PDE3A              | 4.61 | 5.16 | 4.28 |
| NECAB2             | 4.61 | 4.90 | 4.15 |
| CD38               | 4.61 | 5.09 | 4.31 |
| UBQLN4             | 4.61 | 4.89 | 4.11 |
| MIR4772            | 4.61 | 5.20 | 4.23 |
| C17orf80           | 4.61 | 5.11 | 4.05 |
| GCGR               | 4.61 | 5.13 | 4.01 |
| LOC100130507       | 4.61 | 5.04 | 3.98 |
| MPZL2              | 4.61 | 5.50 | 3.86 |
| SLC47A2            | 4.61 | 5.12 | 4.15 |
| OTTHUMG00000171114 | 4.61 | 5.15 | 4.21 |
| FLJ31813           | 4.61 | 4.91 | 4.29 |
| SLC44A5            | 4.61 | 5.34 | 4.27 |
| ZKSCAN2            | 4.61 | 5.25 | 4.28 |
| TAS1R2             | 4.61 | 4.93 | 4.09 |
| ZNF733P            | 4.61 | 5.80 | 3.48 |
| LOC100132111       | 4.61 | 4.96 | 4.19 |
| CCDC65             | 4.61 | 4.97 | 4.33 |
| TBC1D8             | 4.61 | 4.96 | 4.19 |
| ZDHHC13            | 4.61 | 4.94 | 4.10 |
| ANKRD2             | 4.61 | 4.84 | 4.35 |
| RTEL1-TNFRSF6B     | 4.61 | 4.80 | 4.42 |
| FSIP1              | 4.61 | 4.98 | 4.14 |
| LRIT1              | 4.61 | 5.12 | 4.00 |
| SNORD66            | 4.61 | 5.15 | 3.91 |
| GNLY               | 4.61 | 5.22 | 4.05 |
| CLUL1              | 4.61 | 5.20 | 4.17 |
| HES2               | 4.61 | 4.87 | 4.32 |
| SPIN2B             | 4.61 | 4.94 | 4.07 |
| DNAJA1P5           | 4.61 | 5.98 | 3.16 |

|                    |      |      |      |
|--------------------|------|------|------|
| SLC18A3            | 4.61 | 5.04 | 4.34 |
| NOXRED1            | 4.61 | 4.88 | 4.16 |
| CDRT1              | 4.61 | 5.01 | 4.17 |
| KIF2B              | 4.61 | 4.81 | 4.30 |
| MFHAS1             | 4.61 | 4.87 | 4.35 |
| HSD17B14           | 4.61 | 5.44 | 4.18 |
| CNOT6              | 4.61 | 4.96 | 4.39 |
| LOC100507117       | 4.61 | 5.14 | 3.97 |
| SNORD115-20        | 4.61 | 5.77 | 3.32 |
| STXBP4             | 4.61 | 4.98 | 4.33 |
| TROAP              | 4.61 | 4.81 | 4.24 |
| PSG10P             | 4.61 | 4.88 | 4.25 |
| CACNA2D4           | 4.61 | 5.18 | 4.18 |
| OTTHUMG00000162555 | 4.61 | 4.86 | 4.36 |
| ZNF607             | 4.61 | 5.01 | 4.18 |
| ARHGAP6            | 4.60 | 5.06 | 4.28 |
| MANSC1             | 4.60 | 5.05 | 3.97 |
| CCDC140            | 4.60 | 4.91 | 4.15 |
| OTTHUMG00000155650 | 4.60 | 4.94 | 4.32 |
| FBXO34             | 4.60 | 5.01 | 4.16 |
| BFSP1              | 4.60 | 5.03 | 3.91 |
| C6orf211           | 4.60 | 5.39 | 3.73 |
| TAF4B              | 4.60 | 4.77 | 4.24 |
| AMBP               | 4.60 | 5.36 | 4.23 |
| BCL7A              | 4.60 | 5.23 | 4.15 |
| OTTHUMG00000161869 | 4.60 | 4.98 | 4.24 |
| THSD4              | 4.60 | 4.92 | 4.26 |
| VAV2               | 4.60 | 4.99 | 4.18 |
| OR2AT4             | 4.60 | 5.13 | 4.16 |
| MIR769             | 4.60 | 5.12 | 4.08 |
| VASH2              | 4.60 | 4.86 | 4.30 |
| ZNF544             | 4.60 | 4.99 | 4.00 |
| SLC25A22           | 4.60 | 4.93 | 4.32 |
| CNTD1              | 4.60 | 5.07 | 4.34 |
| MAP2K4             | 4.60 | 5.14 | 3.82 |
| HDGFL1             | 4.60 | 5.01 | 4.24 |
| C17orf51           | 4.60 | 5.10 | 4.22 |
| CCDC17             | 4.60 | 5.08 | 4.19 |
| TMEM178B           | 4.60 | 5.09 | 4.25 |
| ISYNA1             | 4.60 | 5.00 | 4.14 |
| CEACAM20           | 4.60 | 5.53 | 3.91 |
| TRAV4              | 4.60 | 4.90 | 4.09 |
| OTTHUMG00000160896 | 4.60 | 5.03 | 4.36 |
| OTTHUMG00000157143 | 4.60 | 5.77 | 3.82 |
| PCBD1              | 4.60 | 5.08 | 3.98 |
| EXOC3L4            | 4.60 | 5.12 | 4.29 |
| ENTPD3-AS1         | 4.60 | 5.24 | 4.00 |
| SPEF2              | 4.60 | 4.92 | 4.35 |
| LOC100996251       | 4.60 | 5.13 | 4.04 |

|                    |      |      |      |
|--------------------|------|------|------|
| SLC1A7             | 4.60 | 4.99 | 4.19 |
| SNX22              | 4.60 | 4.97 | 4.22 |
| TBCC               | 4.60 | 4.93 | 4.22 |
| PLXNA1             | 4.60 | 5.16 | 4.06 |
| ZNF16              | 4.60 | 4.82 | 3.91 |
| SPATA31A7          | 4.60 | 5.19 | 4.15 |
| ZNF18              | 4.60 | 4.82 | 4.00 |
| F12                | 4.60 | 5.07 | 4.14 |
| LINC00960          | 4.60 | 5.53 | 3.34 |
| SCRIB              | 4.60 | 5.13 | 4.01 |
| MAMLD1             | 4.60 | 4.86 | 4.26 |
| RNA5SP410          | 4.60 | 5.18 | 4.14 |
| OTTHUMG00000137385 | 4.60 | 4.94 | 4.19 |
| C1orf127           | 4.60 | 5.02 | 4.16 |
| OTTHUMG00000015619 | 4.60 | 5.19 | 4.09 |
| UHRF1              | 4.60 | 4.77 | 4.30 |
| HSD11B1            | 4.60 | 5.18 | 4.26 |
| ALS2CR12           | 4.60 | 5.01 | 4.37 |
| TENM3              | 4.60 | 5.05 | 4.09 |
| OTTHUMG00000153433 | 4.60 | 4.85 | 4.22 |
| OR56B4             | 4.60 | 5.51 | 3.95 |
| MBLAC2             | 4.60 | 4.94 | 4.33 |
| RAX                | 4.60 | 5.09 | 4.06 |
| STARD13-IT1        | 4.60 | 5.08 | 3.97 |
| ZNF439             | 4.60 | 5.23 | 4.01 |
| RPS4Y1             | 4.60 | 5.59 | 2.85 |
| KLK7               | 4.60 | 5.03 | 4.20 |
| SCN3B              | 4.60 | 4.96 | 4.21 |
| ZUFSP              | 4.60 | 5.28 | 4.09 |
| ZNF345             | 4.60 | 4.93 | 4.47 |
| SYNC               | 4.60 | 5.32 | 4.08 |
| LOC157860          | 4.60 | 5.14 | 3.94 |
| EFTUD1             | 4.60 | 5.20 | 4.15 |
| CARD16             | 4.60 | 5.02 | 4.03 |
| SLCO2B1            | 4.60 | 5.52 | 3.95 |
| DYSF               | 4.60 | 4.91 | 4.27 |
| LOC401068          | 4.60 | 5.13 | 4.12 |
| OTTHUMG00000184009 | 4.60 | 5.17 | 4.17 |
| OTTHUMG00000171590 | 4.60 | 5.13 | 3.96 |
| RPAIN              | 4.60 | 4.98 | 4.14 |
| AGXT               | 4.60 | 5.13 | 3.89 |
| NCKIPSD            | 4.60 | 5.05 | 4.32 |
| GIGYF1             | 4.60 | 5.15 | 4.22 |
| C1orf65            | 4.60 | 5.00 | 4.07 |
| ZNF618             | 4.60 | 5.12 | 4.32 |
| GCNT3              | 4.60 | 5.06 | 4.20 |
| ANAPC10            | 4.60 | 4.89 | 4.30 |
| EHD1               | 4.60 | 4.88 | 4.40 |
| SCAND1             | 4.60 | 4.93 | 3.92 |

|                    |      |      |      |
|--------------------|------|------|------|
| HOXC11             | 4.60 | 4.94 | 4.28 |
| FLJ27354           | 4.60 | 4.81 | 4.30 |
| LOC100996378       | 4.60 | 4.93 | 4.23 |
| MAFG-AS1           | 4.60 | 5.00 | 4.13 |
| WDYHV1             | 4.60 | 5.01 | 4.23 |
| OTTHUMG00000010575 | 4.60 | 4.96 | 4.18 |
| MDM1               | 4.59 | 4.90 | 4.28 |
| C1QL1              | 4.59 | 4.97 | 4.11 |
| OTTHUMG00000019095 | 4.59 | 4.95 | 4.27 |
| MIR1295A           | 4.59 | 5.12 | 4.11 |
| GCRG224            | 4.59 | 5.09 | 3.65 |
| MEIS1-AS3          | 4.59 | 5.03 | 3.90 |
| FAM66D             | 4.59 | 5.48 | 3.59 |
| KRTAP1-1           | 4.59 | 5.22 | 4.11 |
| ELFN1              | 4.59 | 5.05 | 3.81 |
| OLFM2              | 4.59 | 4.87 | 4.42 |
| FLJ31662           | 4.59 | 5.02 | 3.90 |
| SNORD116-21        | 4.59 | 5.37 | 3.45 |
| NCR1               | 4.59 | 4.83 | 4.02 |
| OTTHUMG00000163891 | 4.59 | 4.94 | 4.02 |
| UBE2N              | 4.59 | 4.82 | 4.22 |
| VSTM1              | 4.59 | 5.11 | 3.81 |
| C10orf2            | 4.59 | 4.86 | 4.34 |
| CHEK1              | 4.59 | 5.13 | 4.14 |
| OTTHUMG00000019263 | 4.59 | 4.88 | 4.31 |
| STXBP6             | 4.59 | 4.84 | 4.16 |
| ARHGEF5            | 4.59 | 5.13 | 4.13 |
| ERN1               | 4.59 | 4.85 | 4.20 |
| OTTHUMG00000152992 | 4.59 | 5.07 | 3.93 |
| SHH                | 4.59 | 4.95 | 4.31 |
| C1orf109           | 4.59 | 4.90 | 4.37 |
| EGR3               | 4.59 | 4.91 | 4.15 |
| ANKS4B             | 4.59 | 5.19 | 3.95 |
| KSR2               | 4.59 | 5.08 | 4.01 |
| GAB3               | 4.59 | 5.22 | 4.17 |
| TRPM5              | 4.59 | 4.95 | 4.14 |
| MBNL3              | 4.59 | 5.23 | 3.73 |
| FAM221A            | 4.59 | 4.89 | 4.05 |
| PIK3CD             | 4.59 | 4.96 | 4.08 |
| OR51G2             | 4.59 | 5.00 | 4.07 |
| C7orf50            | 4.59 | 5.12 | 4.25 |
| ZNF132             | 4.59 | 5.14 | 4.18 |
| OTTHUMG00000151498 | 4.59 | 4.82 | 4.30 |
| GAL                | 4.59 | 4.87 | 4.12 |
| LOC100131138       | 4.59 | 4.77 | 4.13 |
| SRPX               | 4.59 | 5.03 | 4.21 |
| LOC100507362       | 4.59 | 4.81 | 4.42 |
| TOMM34             | 4.59 | 4.87 | 4.19 |
| UAP1L1             | 4.59 | 4.88 | 4.30 |



|                    |      |      |      |
|--------------------|------|------|------|
| SNORA49            | 4.59 | 5.37 | 3.72 |
| C9orf37            | 4.59 | 4.98 | 4.00 |
| PRELID2            | 4.59 | 4.98 | 4.13 |
| CAMKV              | 4.59 | 4.93 | 4.28 |
| DDO                | 4.59 | 4.82 | 4.14 |
| RNU12-2P           | 4.59 | 5.22 | 3.92 |
| OTTHUMG00000155977 | 4.59 | 5.20 | 4.13 |
| LOC729291          | 4.59 | 5.07 | 4.23 |
| HEPH               | 4.59 | 4.88 | 4.27 |
| PAN3-AS1           | 4.59 | 4.85 | 4.29 |
| LTB4R              | 4.59 | 4.97 | 4.06 |
| VPREB1             | 4.59 | 4.81 | 4.34 |
| ALG9-IT1           | 4.59 | 5.01 | 3.81 |
| P4HA2-AS1          | 4.59 | 5.11 | 4.10 |
| PAPPA2             | 4.59 | 4.95 | 3.98 |
| OTTHUMG00000178141 | 4.59 | 4.93 | 4.16 |
| JMJD7-PLA2G4B      | 4.59 | 4.98 | 4.33 |
| ERVMER61-1         | 4.59 | 5.22 | 4.01 |
| FAM114A2           | 4.59 | 4.86 | 4.25 |
| NDP                | 4.59 | 5.29 | 3.55 |
| IGSF11             | 4.59 | 5.15 | 4.27 |
| FBXO39             | 4.59 | 5.12 | 4.24 |
| LOC100507449       | 4.59 | 4.93 | 4.20 |
| UTP23              | 4.59 | 4.97 | 4.01 |
| NPC1L1             | 4.59 | 5.16 | 3.94 |
| PROKR1             | 4.59 | 5.11 | 4.03 |
| MYBL1              | 4.59 | 5.79 | 3.69 |
| NUDT4P1            | 4.59 | 5.03 | 3.78 |
| TSPAN16            | 4.59 | 5.18 | 4.20 |
| LGALS7             | 4.59 | 4.95 | 4.37 |
| TAS2R3             | 4.59 | 5.02 | 4.02 |
| LOC100506124       | 4.59 | 5.39 | 3.66 |
| RNA5SP467          | 4.59 | 5.26 | 3.92 |
| NPR1               | 4.59 | 5.01 | 4.02 |
| LRRC45             | 4.58 | 4.92 | 4.02 |
| SH2D3A             | 4.58 | 5.38 | 4.15 |
| EBF4               | 4.58 | 4.90 | 4.15 |
| PLCL2-AS1          | 4.58 | 5.22 | 3.97 |
| RAB11FIP1          | 4.58 | 5.03 | 4.27 |
| ACTL9              | 4.58 | 4.93 | 4.41 |
| CHRNA2             | 4.58 | 4.90 | 4.32 |
| PLA2G2D            | 4.58 | 5.06 | 4.03 |
| RDH16              | 4.58 | 5.50 | 4.04 |
| TMEM198            | 4.58 | 5.10 | 3.84 |
| TMEM38B            | 4.58 | 4.90 | 3.95 |
| ABCA2              | 4.58 | 4.76 | 4.19 |
| KLHL30             | 4.58 | 5.20 | 4.22 |
| CHRNG              | 4.58 | 4.84 | 4.43 |
| IFFO2              | 4.58 | 4.90 | 4.18 |

|                     |      |      |      |
|---------------------|------|------|------|
| ZSWIM3              | 4.58 | 5.17 | 4.20 |
| TRIM48              | 4.58 | 5.02 | 3.89 |
| PEBP4               | 4.58 | 5.00 | 4.28 |
| MIR4681             | 4.58 | 5.15 | 3.07 |
| OTTHUMG00000020685  | 4.58 | 4.94 | 3.95 |
| CRYGN               | 4.58 | 5.14 | 4.32 |
| LOC100506917        | 4.58 | 5.04 | 4.07 |
| DSTYK               | 4.58 | 5.21 | 4.11 |
| KCNK3               | 4.58 | 5.31 | 4.22 |
| FLJ36000            | 4.58 | 5.22 | 4.24 |
| ZNF474              | 4.58 | 5.64 | 4.02 |
| OTTHUMG000000151435 | 4.58 | 4.90 | 4.06 |
| DCST2               | 4.58 | 4.94 | 4.18 |
| GPX5                | 4.58 | 5.16 | 3.82 |
| OTTHUMG00000012112  | 4.58 | 5.39 | 4.21 |
| ABCA7               | 4.58 | 5.19 | 4.08 |
| OTTHUMG000000180065 | 4.58 | 4.91 | 4.02 |
| LOC100507018        | 4.58 | 5.01 | 4.18 |
| PP14571             | 4.58 | 4.91 | 4.14 |
| KIF20B              | 4.58 | 5.18 | 3.91 |
| WDR12               | 4.58 | 5.04 | 4.03 |
| L1TD1               | 4.58 | 4.99 | 4.12 |
| ZNF473              | 4.58 | 5.07 | 4.10 |
| PTPRVP              | 4.58 | 5.09 | 4.20 |
| ZNF224              | 4.58 | 4.88 | 3.80 |
| OAS2                | 4.58 | 5.08 | 4.12 |
| ZMAT4               | 4.58 | 5.01 | 4.33 |
| ZNF192P1            | 4.58 | 4.86 | 4.37 |
| OTTHUMG000000168322 | 4.58 | 4.81 | 4.33 |
| TOR4A               | 4.58 | 4.80 | 4.16 |
| ZNF282              | 4.58 | 4.95 | 4.12 |
| LY6G5C              | 4.58 | 4.87 | 4.27 |
| RNA5SP509           | 4.58 | 5.18 | 3.90 |
| AMMECR1             | 4.58 | 4.93 | 4.09 |
| CCDC30              | 4.58 | 5.89 | 3.38 |
| CCDC70              | 4.58 | 5.05 | 4.10 |
| CABP2               | 4.58 | 5.01 | 3.97 |
| GAPDHS              | 4.58 | 4.79 | 4.16 |
| OTTHUMG000000151749 | 4.58 | 4.94 | 4.26 |
| SNORD16             | 4.58 | 5.22 | 3.50 |
| MVB12B              | 4.58 | 4.81 | 4.18 |
| OTTHUMG000000164015 | 4.58 | 5.21 | 3.99 |
| RPA4                | 4.58 | 5.04 | 4.11 |
| GPC5                | 4.58 | 5.74 | 3.39 |
| ESR2                | 4.58 | 4.81 | 4.38 |
| DUOX1               | 4.58 | 4.85 | 3.97 |
| AQP12B              | 4.58 | 4.98 | 4.13 |
| CDX1                | 4.58 | 4.90 | 4.17 |
| DDX28               | 4.58 | 5.00 | 3.81 |

|                    |      |      |      |
|--------------------|------|------|------|
| LINC00086          | 4.58 | 5.27 | 3.84 |
| LMNB1              | 4.58 | 5.36 | 4.22 |
| OTTHUMG00000153313 | 4.58 | 4.92 | 4.31 |
| SLAMF9             | 4.58 | 5.17 | 4.07 |
| C6                 | 4.58 | 5.39 | 3.96 |
| LARS2-AS1          | 4.58 | 4.92 | 4.18 |
| TTC22              | 4.58 | 5.04 | 4.22 |
| NPPB               | 4.58 | 4.89 | 4.16 |
| TEN1-CDK3          | 4.57 | 5.04 | 4.11 |
| OTTHUMG00000159262 | 4.57 | 5.01 | 4.12 |
| MIR378D2           | 4.57 | 5.07 | 4.19 |
| OTTHUMG00000153159 | 4.57 | 5.26 | 3.74 |
| GRIA1              | 4.57 | 5.27 | 4.10 |
| LOC645249          | 4.57 | 4.95 | 4.20 |
| POU6F2             | 4.57 | 4.86 | 4.20 |
| OTTHUMG00000020570 | 4.57 | 5.06 | 3.95 |
| PGLYRP3            | 4.57 | 5.00 | 4.10 |
| TPRN               | 4.57 | 4.87 | 4.09 |
| CARD17             | 4.57 | 4.76 | 4.34 |
| KPTN               | 4.57 | 5.04 | 4.21 |
| LOC100506207       | 4.57 | 4.89 | 4.19 |
| HS1BP3             | 4.57 | 4.89 | 4.22 |
| JAG2               | 4.57 | 5.05 | 4.18 |
| ABCG4              | 4.57 | 4.85 | 4.15 |
| SUV39H2            | 4.57 | 5.04 | 4.10 |
| LOC100506413       | 4.57 | 5.26 | 3.95 |
| ADAD2              | 4.57 | 5.08 | 4.30 |
| OTTHUMG00000168357 | 4.57 | 4.82 | 4.21 |
| EGR2               | 4.57 | 4.89 | 4.16 |
| GBAS               | 4.57 | 4.92 | 4.27 |
| C1orf213           | 4.57 | 4.81 | 4.32 |
| LOC100506947       | 4.57 | 5.00 | 4.14 |
| WNT4               | 4.57 | 4.99 | 4.18 |
| SIGLEC5            | 4.57 | 4.95 | 4.09 |
| LOC100128076       | 4.57 | 4.86 | 4.17 |
| OTTHUMG00000165321 | 4.57 | 5.01 | 4.09 |
| KLHL12             | 4.57 | 4.86 | 4.01 |
| C14orf169          | 4.57 | 4.90 | 4.24 |
| OTTHUMG00000153867 | 4.57 | 5.00 | 4.03 |
| SSX2IP             | 4.57 | 5.17 | 4.29 |
| LSM12              | 4.57 | 5.39 | 3.59 |
| SRPK3              | 4.57 | 4.91 | 4.25 |
| LINC00251          | 4.57 | 4.98 | 4.03 |
| RASGRF1            | 4.57 | 5.07 | 4.09 |
| FAM170A            | 4.57 | 5.08 | 3.70 |
| FBLN2              | 4.57 | 5.30 | 3.58 |
| ZC3HC1             | 4.57 | 4.88 | 4.28 |
| OTTHUMG00000012183 | 4.57 | 5.33 | 3.94 |
| TRAM2-AS1          | 4.57 | 5.08 | 4.22 |

|                    |      |      |      |
|--------------------|------|------|------|
| SNX32              | 4.57 | 4.96 | 4.18 |
| CHIC1              | 4.57 | 4.90 | 4.21 |
| LOC284632          | 4.57 | 5.15 | 4.14 |
| OTTHUMG00000167041 | 4.57 | 5.20 | 4.01 |
| RASGRF2            | 4.57 | 5.11 | 4.03 |
| RNU7-47P           | 4.57 | 5.23 | 3.79 |
| MIR4300            | 4.57 | 5.18 | 4.19 |
| LOC100507462       | 4.57 | 5.40 | 4.00 |
| DPPA5              | 4.57 | 5.09 | 4.05 |
| TMEM236            | 4.57 | 5.20 | 4.03 |
| DCST1              | 4.57 | 5.00 | 4.16 |
| HMGB3P1            | 4.57 | 5.45 | 3.79 |
| MIR548A2           | 4.57 | 5.47 | 3.93 |
| PRKAG3             | 4.57 | 4.86 | 4.29 |
| OTTHUMG00000152442 | 4.57 | 5.12 | 4.01 |
| CCDC180            | 4.57 | 4.83 | 4.36 |
| GJB3               | 4.57 | 5.09 | 4.25 |
| TUFT1              | 4.57 | 4.86 | 4.13 |
| ZNF101             | 4.57 | 4.86 | 4.32 |
| TIFAB              | 4.57 | 5.31 | 4.06 |
| LOC100131289       | 4.57 | 4.91 | 4.11 |
| ANP32A             | 4.57 | 4.80 | 4.04 |
| ORC1               | 4.57 | 4.87 | 4.13 |
| SLC22A13           | 4.57 | 5.13 | 4.17 |
| GRIN2C             | 4.57 | 4.89 | 3.96 |
| ETV4               | 4.57 | 5.08 | 4.17 |
| OTTHUMG00000151775 | 4.57 | 5.04 | 4.14 |
| ITGB2-AS1          | 4.57 | 5.10 | 4.00 |
| STMN4              | 4.57 | 4.98 | 4.16 |
| LOC100128594       | 4.57 | 4.93 | 4.17 |
| LRRC4              | 4.57 | 4.86 | 4.17 |
| FAM211A            | 4.57 | 5.01 | 4.18 |
| AKR1C3             | 4.57 | 5.28 | 4.02 |
| LOC148638          | 4.57 | 5.44 | 4.21 |
| KIR3DL1            | 4.57 | 5.62 | 3.28 |
| SNORA46            | 4.57 | 5.50 | 3.96 |
| H1FNT              | 4.57 | 4.94 | 3.71 |
| CXorf48            | 4.57 | 4.91 | 4.13 |
| GABRB3             | 4.57 | 5.15 | 4.11 |
| MT3                | 4.57 | 5.48 | 3.63 |
| OTTHUMG00000153755 | 4.57 | 4.95 | 4.11 |
| C19orf35           | 4.56 | 5.12 | 3.72 |
| CRHR1-IT1          | 4.56 | 4.97 | 4.15 |
| SOCS2-AS1          | 4.56 | 4.95 | 4.06 |
| DCUN1D2            | 4.56 | 4.90 | 4.06 |
| AIM1L              | 4.56 | 5.07 | 4.20 |
| LOC653160          | 4.56 | 4.88 | 4.26 |
| CIDEA              | 4.56 | 5.01 | 4.21 |
| SP140              | 4.56 | 5.04 | 4.12 |

|                    |      |      |      |
|--------------------|------|------|------|
| INHBB              | 4.56 | 4.82 | 4.12 |
| OAS3               | 4.56 | 5.00 | 4.19 |
| TMC3               | 4.56 | 4.90 | 4.07 |
| SPANXB1            | 4.56 | 4.85 | 4.30 |
| FAM127A            | 4.56 | 5.03 | 4.11 |
| COL6A6             | 4.56 | 5.01 | 3.83 |
| ELFN2              | 4.56 | 4.93 | 4.22 |
| OTTHUMG00000167502 | 4.56 | 5.16 | 4.05 |
| FAM179A            | 4.56 | 5.39 | 4.04 |
| FAM83A-AS1         | 4.56 | 4.87 | 4.33 |
| NEURL4             | 4.56 | 4.81 | 4.23 |
| LEFTY1             | 4.56 | 5.08 | 4.33 |
| CDC7               | 4.56 | 5.18 | 4.05 |
| TMEM132E           | 4.56 | 5.03 | 4.33 |
| LINC00967          | 4.56 | 4.84 | 4.32 |
| F8                 | 4.56 | 4.69 | 4.09 |
| FAM215A            | 4.56 | 5.13 | 3.72 |
| KLHDC8B            | 4.56 | 5.06 | 4.01 |
| FAT3               | 4.56 | 5.02 | 3.69 |
| MIR425             | 4.56 | 5.05 | 4.01 |
| CCDC69             | 4.56 | 4.95 | 4.23 |
| LCA10              | 4.56 | 5.42 | 3.93 |
| PITPNM2            | 4.56 | 4.95 | 4.25 |
| TIMELESS           | 4.56 | 4.94 | 4.33 |
| OTTHUMG00000017550 | 4.56 | 5.18 | 4.17 |
| NKIRAS2            | 4.56 | 5.03 | 4.10 |
| AQP6               | 4.56 | 5.21 | 3.94 |
| MRGPRF             | 4.56 | 5.14 | 3.89 |
| OTTHUMG00000018883 | 4.56 | 5.05 | 4.18 |
| RFX5               | 4.56 | 4.73 | 4.34 |
| NHS                | 4.56 | 5.02 | 4.15 |
| FANK1              | 4.56 | 4.79 | 4.21 |
| PNO1               | 4.56 | 5.14 | 4.00 |
| GPR150             | 4.56 | 5.14 | 4.15 |
| RPS15AP10          | 4.56 | 5.17 | 3.76 |
| OTTHUMG00000015399 | 4.56 | 5.42 | 4.28 |
| OTTHUMG00000035513 | 4.56 | 5.16 | 3.68 |
| BTNL9              | 4.56 | 5.03 | 4.12 |
| CTH                | 4.56 | 5.30 | 3.84 |
| DACH1              | 4.56 | 5.16 | 4.12 |
| SFXN1              | 4.56 | 5.12 | 4.12 |
| TSHR               | 4.56 | 5.03 | 4.02 |
| HOXB8              | 4.56 | 4.95 | 4.37 |
| LINC00404          | 4.56 | 4.86 | 4.26 |
| ANKRD9             | 4.56 | 4.90 | 4.29 |
| NANOS2             | 4.56 | 5.47 | 3.95 |
| HLCS-IT1           | 4.56 | 5.10 | 4.12 |
| BARD1              | 4.56 | 4.92 | 4.04 |
| CCNO               | 4.56 | 4.96 | 4.25 |

|                     |      |      |      |
|---------------------|------|------|------|
| OSCAR               | 4.56 | 5.00 | 4.29 |
| ADAMTS15            | 4.56 | 5.05 | 4.29 |
| OR4C6               | 4.56 | 5.04 | 4.19 |
| C9orf66             | 4.56 | 5.14 | 4.19 |
| ART4                | 4.56 | 4.90 | 4.17 |
| MID1                | 4.56 | 4.95 | 3.97 |
| SLC5A6              | 4.56 | 4.84 | 4.27 |
| MAST3               | 4.56 | 5.13 | 4.13 |
| HSH2D               | 4.56 | 4.82 | 4.21 |
| SHMT1               | 4.56 | 4.95 | 4.28 |
| OTTHUMG00000017942  | 4.56 | 4.82 | 4.04 |
| STK17B              | 4.56 | 5.17 | 3.95 |
| MAFK                | 4.56 | 4.95 | 4.25 |
| DNAAF1              | 4.56 | 4.88 | 4.13 |
| RNA5SP405           | 4.56 | 5.06 | 3.74 |
| SYCP2               | 4.56 | 5.11 | 4.10 |
| DRC1                | 4.56 | 4.76 | 4.28 |
| DDX43               | 4.56 | 4.77 | 4.22 |
| C3orf83             | 4.56 | 5.05 | 4.22 |
| EHMT2-AS1           | 4.56 | 4.94 | 4.09 |
| CALHM3              | 4.56 | 5.27 | 3.90 |
| ZNF788              | 4.56 | 5.15 | 3.86 |
| CCL4L2              | 4.56 | 5.41 | 4.16 |
| CACNA1C-IT3         | 4.56 | 5.23 | 3.99 |
| KLHDC7B             | 4.56 | 5.27 | 4.15 |
| IL22RA1             | 4.56 | 4.85 | 4.31 |
| CDY2B               | 4.56 | 5.07 | 4.05 |
| ZNF850              | 4.56 | 5.03 | 4.06 |
| PDZD9               | 4.56 | 4.82 | 4.13 |
| GYG1                | 4.56 | 4.96 | 4.10 |
| PIFO                | 4.56 | 5.53 | 3.90 |
| EMC6                | 4.56 | 5.13 | 3.68 |
| GABBR2              | 4.56 | 4.87 | 4.37 |
| PSMD4               | 4.56 | 4.98 | 4.12 |
| CFLAR-AS1           | 4.56 | 4.86 | 4.34 |
| TMPRSS4             | 4.56 | 5.09 | 4.25 |
| LINC00111           | 4.56 | 5.11 | 4.20 |
| OR10C1              | 4.56 | 4.97 | 3.99 |
| CFP                 | 4.56 | 4.98 | 4.19 |
| KCNIP3              | 4.56 | 5.13 | 3.49 |
| OTTHUMG000000154105 | 4.56 | 4.83 | 4.31 |
| AP5S1               | 4.55 | 5.10 | 3.91 |
| MS4A10              | 4.55 | 4.87 | 4.18 |
| LOC100506113        | 4.55 | 5.14 | 3.79 |
| FLJ44511            | 4.55 | 4.79 | 4.41 |
| CLEC5A              | 4.55 | 5.38 | 3.91 |
| KLHL26              | 4.55 | 4.84 | 4.02 |
| CYP3A7-CYP3AP1      | 4.55 | 4.97 | 3.97 |
| C1D                 | 4.55 | 5.11 | 4.05 |

|                    |      |      |      |
|--------------------|------|------|------|
| FBXO45             | 4.55 | 4.82 | 4.05 |
| PRICKLE4           | 4.55 | 5.01 | 4.02 |
| ENDOU              | 4.55 | 4.83 | 4.18 |
| MATN1-AS1          | 4.55 | 4.83 | 4.21 |
| KRT4               | 4.55 | 5.03 | 4.13 |
| IGLV3-21           | 4.55 | 5.14 | 3.86 |
| MYOZ1              | 4.55 | 4.96 | 4.35 |
| KRTAP10-5          | 4.55 | 5.29 | 3.34 |
| ADAMTS17           | 4.55 | 5.07 | 3.91 |
| ITGA2B             | 4.55 | 4.94 | 4.31 |
| IQCD               | 4.55 | 4.81 | 4.33 |
| C11orf45           | 4.55 | 5.11 | 4.21 |
| IGHD               | 4.55 | 4.87 | 4.12 |
| C16orf52           | 4.55 | 4.98 | 4.10 |
| LYRM4              | 4.55 | 4.87 | 4.26 |
| ZNF257             | 4.55 | 5.34 | 3.83 |
| KRT15              | 4.55 | 4.89 | 4.27 |
| LOC100505679       | 4.55 | 4.83 | 4.09 |
| LOC100506928       | 4.55 | 5.72 | 4.16 |
| ZNF33B             | 4.55 | 5.66 | 3.64 |
| SNORD91B           | 4.55 | 5.30 | 3.44 |
| OTTHUMG00000158357 | 4.55 | 4.97 | 4.13 |
| P2RX7              | 4.55 | 5.16 | 4.11 |
| SCARF2             | 4.55 | 4.83 | 4.36 |
| TRIM32             | 4.55 | 5.14 | 3.81 |
| CEBPA-AS1          | 4.55 | 5.24 | 4.11 |
| SEPT3              | 4.55 | 5.01 | 4.19 |
| ZC2HC1C            | 4.55 | 4.82 | 4.18 |
| BTBD18             | 4.55 | 4.91 | 4.14 |
| HTT-AS1            | 4.55 | 5.08 | 4.07 |
| IRAK1              | 4.55 | 5.18 | 4.11 |
| FAM171A1           | 4.55 | 4.86 | 4.30 |
| ATP6V1H            | 4.55 | 4.93 | 4.04 |
| SLC1A3             | 4.55 | 4.78 | 4.31 |
| C1QTNF2            | 4.55 | 5.09 | 4.05 |
| HKDC1              | 4.55 | 5.04 | 4.21 |
| MYADML             | 4.55 | 4.93 | 3.48 |
| LOC100128591       | 4.55 | 4.91 | 4.03 |
| RGS11              | 4.55 | 5.16 | 4.25 |
| EBF3               | 4.55 | 4.97 | 4.02 |
| OTTHUMG00000164820 | 4.55 | 4.99 | 4.23 |
| LOC440602          | 4.55 | 4.86 | 4.37 |
| RHOA-IT1           | 4.55 | 4.88 | 4.16 |
| ATAD2              | 4.55 | 5.13 | 4.07 |
| HINT2              | 4.55 | 4.89 | 4.14 |
| IRS2               | 4.55 | 4.88 | 3.97 |
| OTTHUMG00000021338 | 4.55 | 4.82 | 4.14 |
| RHBDD1             | 4.55 | 4.92 | 4.16 |
| CLCNKA             | 4.55 | 5.22 | 4.11 |

|                    |      |      |      |
|--------------------|------|------|------|
| ADARB2-AS1         | 4.55 | 5.09 | 3.94 |
| NAG20              | 4.55 | 5.25 | 3.88 |
| KRTAP5-11          | 4.55 | 5.09 | 3.96 |
| NRXN3              | 4.55 | 4.93 | 3.96 |
| LRP4-AS1           | 4.55 | 5.00 | 4.09 |
| APCDD1L-AS1        | 4.55 | 5.92 | 3.91 |
| NT5DC3             | 4.55 | 4.77 | 4.23 |
| CHST13             | 4.55 | 4.79 | 4.05 |
| ZBTB7C             | 4.55 | 5.03 | 4.07 |
| GRASP              | 4.55 | 4.85 | 4.01 |
| SPATA31A2          | 4.55 | 5.09 | 4.08 |
| LOC100506679       | 4.55 | 4.94 | 4.19 |
| OR9G1              | 4.55 | 5.07 | 3.67 |
| LINC00322          | 4.55 | 5.10 | 4.01 |
| OTTHUMG00000164954 | 4.55 | 5.00 | 4.13 |
| BMP15              | 4.55 | 4.92 | 4.17 |
| ZNF304             | 4.55 | 4.96 | 4.05 |
| LOC285819          | 4.55 | 5.02 | 4.26 |
| CXorf56            | 4.55 | 4.87 | 4.23 |
| IL17RD             | 4.55 | 4.94 | 4.03 |
| TMEM163            | 4.55 | 5.08 | 4.22 |
| CCKBR              | 4.55 | 4.87 | 4.32 |
| CXorf67            | 4.55 | 4.94 | 4.16 |
| TESK2              | 4.55 | 4.73 | 4.18 |
| RBKS               | 4.55 | 4.96 | 4.17 |
| LRRK2              | 4.55 | 5.22 | 3.90 |
| LOC100996269       | 4.55 | 5.12 | 3.80 |
| CCL23              | 4.55 | 5.08 | 3.69 |
| GAPT               | 4.55 | 4.76 | 4.19 |
| TBC1D22B           | 4.55 | 5.20 | 4.14 |
| SLC25A42           | 4.55 | 4.90 | 4.22 |
| RNA5SP414          | 4.55 | 4.94 | 4.09 |
| OTTHUMG00000182164 | 4.54 | 4.94 | 4.12 |
| TAF1A              | 4.54 | 5.11 | 4.13 |
| OTTHUMG00000168496 | 4.54 | 5.23 | 4.15 |
| GDPD1              | 4.54 | 5.28 | 3.78 |
| CHRNA1             | 4.54 | 5.11 | 3.60 |
| OTTHUMG00000040659 | 4.54 | 5.46 | 3.73 |
| PCDHB2             | 4.54 | 5.09 | 3.77 |
| KAT5               | 4.54 | 5.02 | 3.81 |
| OR2Z1              | 4.54 | 5.20 | 3.91 |
| PEAR1              | 4.54 | 5.11 | 3.71 |
| OCM                | 4.54 | 5.02 | 3.72 |
| BAI1               | 4.54 | 4.95 | 4.21 |
| SELRC1             | 4.54 | 5.12 | 4.18 |
| SGK2               | 4.54 | 4.94 | 4.19 |
| KEL                | 4.54 | 5.33 | 4.10 |
| WDR25              | 4.54 | 4.98 | 4.19 |
| NCKAP5             | 4.54 | 5.04 | 3.89 |



|                    |      |      |      |
|--------------------|------|------|------|
| MYL3               | 4.54 | 4.89 | 4.27 |
| MIR328             | 4.54 | 5.62 | 3.80 |
| CD28               | 4.54 | 5.15 | 3.68 |
| OTTHUMG00000086723 | 4.54 | 4.89 | 3.87 |
| SSTR4              | 4.54 | 5.03 | 3.95 |
| NDRG4              | 4.54 | 4.91 | 4.23 |
| ZNF408             | 4.54 | 4.79 | 4.42 |
| TMEM61             | 4.54 | 4.88 | 4.24 |
| ZNF736             | 4.54 | 5.08 | 4.10 |
| SLIT2-IT1          | 4.54 | 4.98 | 4.14 |
| PADI2              | 4.54 | 5.23 | 4.20 |
| PAGE2              | 4.54 | 4.98 | 3.65 |
| ZCCHC18            | 4.54 | 4.82 | 4.06 |
| LOC100506997       | 4.54 | 4.96 | 4.24 |
| DDX11L2            | 4.54 | 5.06 | 3.92 |
| TMEM167A           | 4.54 | 4.94 | 3.94 |
| EGFLAM             | 4.54 | 4.90 | 4.03 |
| TMEM101            | 4.54 | 4.97 | 4.20 |
| OTTHUMG00000032885 | 4.54 | 5.05 | 4.12 |
| CCDC159            | 4.54 | 4.85 | 4.22 |
| PUS7               | 4.54 | 4.99 | 4.02 |
| LRRC8B             | 4.54 | 4.77 | 4.29 |
| PISD               | 4.54 | 4.90 | 4.14 |
| EPN2-IT1           | 4.54 | 4.78 | 4.08 |
| LCN15              | 4.54 | 4.66 | 4.23 |
| RUNDC3B            | 4.54 | 5.16 | 4.17 |
| LOC100270804       | 4.54 | 4.72 | 4.27 |
| DISP2              | 4.54 | 5.15 | 4.09 |
| HHATL              | 4.54 | 4.99 | 4.10 |
| TBC1D10A           | 4.54 | 4.86 | 4.33 |
| PIN1P1             | 4.54 | 5.05 | 4.12 |
| LOC100996637       | 4.54 | 4.72 | 4.23 |
| IER5               | 4.54 | 4.79 | 3.97 |
| MIR580             | 4.54 | 4.98 | 3.63 |
| OTTHUMG00000002490 | 4.54 | 5.12 | 3.88 |
| CIT                | 4.54 | 5.02 | 4.22 |
| CLTCL1             | 4.54 | 4.93 | 4.27 |
| OTTHUMG00000170815 | 4.54 | 4.87 | 4.28 |
| TCF7               | 4.54 | 4.99 | 4.10 |
| SLITRK5            | 4.54 | 5.18 | 4.04 |
| GPC4               | 4.54 | 5.13 | 3.96 |
| ACOX2              | 4.54 | 4.98 | 4.26 |
| ITGAD              | 4.54 | 4.91 | 4.20 |
| LOC389332          | 4.54 | 4.92 | 4.29 |
| MAP6D1             | 4.54 | 5.23 | 4.13 |
| ZDHHC11            | 4.54 | 5.13 | 4.18 |
| FAT2               | 4.54 | 5.06 | 4.01 |
| ABHD16A            | 4.54 | 4.84 | 4.30 |
| ALKBH4             | 4.54 | 5.08 | 4.13 |

|                    |      |      |      |
|--------------------|------|------|------|
| MYL1               | 4.54 | 4.97 | 3.92 |
| OTTHUMG00000163492 | 4.54 | 4.89 | 4.02 |
| HDAC11             | 4.54 | 4.99 | 4.20 |
| CHCHD1             | 4.54 | 5.40 | 3.47 |
| PROKR2             | 4.54 | 4.88 | 3.94 |
| PCSK2              | 4.54 | 4.70 | 4.23 |
| LOC100996613       | 4.54 | 5.30 | 3.98 |
| ZNF837             | 4.54 | 4.85 | 4.09 |
| RNF5P1             | 4.54 | 5.17 | 4.13 |
| HTR7P1             | 4.54 | 5.15 | 4.27 |
| SLC39A5            | 4.54 | 4.97 | 4.18 |
| CCDC179            | 4.54 | 4.94 | 4.03 |
| ZAN                | 4.54 | 4.86 | 4.19 |
| NBPF3              | 4.54 | 4.94 | 4.02 |
| MGAT4A             | 4.54 | 5.46 | 3.56 |
| OTTHUMG00000169494 | 4.54 | 4.93 | 4.19 |
| VRK2               | 4.54 | 4.84 | 3.76 |
| SPINT1             | 4.54 | 4.91 | 4.16 |
| FGFR3              | 4.54 | 5.07 | 3.87 |
| DPF3               | 4.54 | 4.90 | 4.27 |
| RNU6-81P           | 4.54 | 5.30 | 3.80 |
| ZMAT5              | 4.54 | 5.12 | 4.20 |
| CDC14A             | 4.53 | 4.80 | 4.25 |
| XIRP1              | 4.53 | 4.88 | 4.11 |
| FLJ34223           | 4.53 | 5.12 | 4.19 |
| OCM2               | 4.53 | 5.03 | 3.66 |
| MAP7               | 4.53 | 4.77 | 4.14 |
| LOC654780          | 4.53 | 4.89 | 4.27 |
| ADRB1              | 4.53 | 4.89 | 4.12 |
| NPHS1              | 4.53 | 4.97 | 4.05 |
| IRF2BP1            | 4.53 | 4.88 | 3.95 |
| ITIH1              | 4.53 | 4.96 | 4.03 |
| KRT84              | 4.53 | 5.18 | 4.18 |
| LRGUK              | 4.53 | 4.81 | 4.28 |
| GFOD1              | 4.53 | 4.89 | 4.26 |
| OTTHUMG00000152758 | 4.53 | 5.14 | 3.96 |
| OTTHUMG00000182863 | 4.53 | 4.97 | 4.24 |
| NPHP3-AS1          | 4.53 | 5.27 | 4.24 |
| ARRDC2             | 4.53 | 4.82 | 4.24 |
| CYP4F8             | 4.53 | 5.11 | 3.85 |
| OTTHUMG00000074550 | 4.53 | 5.07 | 3.97 |
| GPR133             | 4.53 | 5.05 | 3.95 |
| DHRS2              | 4.53 | 4.74 | 4.24 |
| REM2               | 4.53 | 5.04 | 4.14 |
| MIR3972            | 4.53 | 4.92 | 3.78 |
| CYP3A5             | 4.53 | 5.13 | 4.12 |
| KCNA4              | 4.53 | 5.02 | 4.14 |
| KNG1               | 4.53 | 5.14 | 3.98 |
| EFNA3              | 4.53 | 5.28 | 4.09 |

|                    |      |      |      |
|--------------------|------|------|------|
| LIF                | 4.53 | 5.86 | 3.84 |
| ATP1B4             | 4.53 | 4.93 | 4.23 |
| NKX2-8             | 4.53 | 4.96 | 4.14 |
| BPI                | 4.53 | 5.12 | 3.82 |
| PDX1               | 4.53 | 5.04 | 4.10 |
| HEPHL1             | 4.53 | 4.78 | 4.24 |
| OTTHUMG00000165102 | 4.53 | 4.84 | 4.19 |
| GBX2               | 4.53 | 4.87 | 4.27 |
| LOC100128028       | 4.53 | 4.80 | 4.31 |
| GLI1               | 4.53 | 5.02 | 4.00 |
| CNIH3              | 4.53 | 4.90 | 4.11 |
| PRX                | 4.53 | 4.88 | 4.02 |
| DGCR2              | 4.53 | 4.98 | 4.26 |
| FASTKD3            | 4.53 | 5.04 | 3.96 |
| TPTE2P6            | 4.53 | 5.09 | 3.64 |
| MYPOP              | 4.53 | 4.77 | 4.22 |
| CD160              | 4.53 | 4.83 | 4.27 |
| POTEKP             | 4.53 | 4.99 | 4.21 |
| FSCN3              | 4.53 | 4.81 | 4.20 |
| MIR150             | 4.53 | 4.89 | 4.10 |
| NCF1               | 4.53 | 5.30 | 3.86 |
| LOC100507568       | 4.53 | 4.89 | 4.08 |
| LOC100506421       | 4.53 | 5.34 | 3.64 |
| WDFY3-AS2          | 4.53 | 5.31 | 3.52 |
| MFSD9              | 4.53 | 4.91 | 4.23 |
| SETD6              | 4.53 | 4.78 | 4.17 |
| FAM161A            | 4.53 | 4.92 | 3.85 |
| SLC9A3             | 4.53 | 4.85 | 3.89 |
| FAM89A             | 4.53 | 4.81 | 4.33 |
| ARSD               | 4.53 | 4.83 | 4.18 |
| AMZ1               | 4.53 | 4.96 | 4.06 |
| BVES               | 4.53 | 5.31 | 3.79 |
| ZRANB2-AS1         | 4.53 | 4.87 | 4.25 |
| MIR4328            | 4.53 | 4.99 | 3.30 |
| ZNF600             | 4.53 | 5.54 | 3.88 |
| DEPTOR             | 4.53 | 4.88 | 4.15 |
| RUFY4              | 4.53 | 4.98 | 4.09 |
| LOC100996876       | 4.53 | 4.97 | 4.17 |
| DGKQ               | 4.53 | 4.87 | 4.19 |
| LMX1A              | 4.53 | 4.76 | 4.03 |
| KCNS1              | 4.53 | 5.07 | 4.15 |
| ESRRA              | 4.53 | 5.14 | 4.29 |
| MIR4421            | 4.53 | 5.32 | 3.64 |
| TESPA1             | 4.53 | 4.92 | 4.14 |
| TBCEL              | 4.53 | 5.07 | 4.09 |
| TBX3               | 4.53 | 4.92 | 4.27 |
| MBP                | 4.53 | 4.92 | 4.11 |
| HLA-F-AS1          | 4.53 | 5.08 | 4.08 |
| HP09025            | 4.53 | 4.92 | 4.22 |

|                    |      |      |      |
|--------------------|------|------|------|
| FAM188B2           | 4.53 | 4.95 | 4.30 |
| PRIMA1             | 4.52 | 5.08 | 4.04 |
| WNT3A              | 4.52 | 4.73 | 4.17 |
| CAPN11             | 4.52 | 4.82 | 3.89 |
| KRT3               | 4.52 | 5.07 | 3.91 |
| LOC100129138       | 4.52 | 4.91 | 4.19 |
| TMEM151B           | 4.52 | 4.82 | 4.27 |
| MRPL44             | 4.52 | 5.08 | 3.87 |
| MORN1              | 4.52 | 4.87 | 4.17 |
| LOC100129961       | 4.52 | 5.02 | 4.05 |
| HSF2BP             | 4.52 | 4.86 | 4.14 |
| CRX                | 4.52 | 4.93 | 3.88 |
| SPAG4              | 4.52 | 5.21 | 3.96 |
| LOC101060305       | 4.52 | 5.07 | 4.00 |
| CCIN               | 4.52 | 4.69 | 4.31 |
| CHKB-AS1           | 4.52 | 4.95 | 4.20 |
| LENG1              | 4.52 | 4.87 | 4.34 |
| FGF18              | 4.52 | 4.94 | 4.06 |
| CYB5RL             | 4.52 | 4.74 | 4.11 |
| KYNU               | 4.52 | 5.96 | 3.67 |
| PPIAL4G            | 4.52 | 5.29 | 4.07 |
| MIR3138            | 4.52 | 4.80 | 4.15 |
| RNA5SP423          | 4.52 | 5.39 | 4.06 |
| MACROD1            | 4.52 | 4.95 | 4.06 |
| OTTHUMG00000163226 | 4.52 | 4.88 | 4.04 |
| METTL21D           | 4.52 | 4.86 | 4.16 |
| FAM86C2P           | 4.52 | 4.77 | 4.03 |
| CYFIP2             | 4.52 | 4.89 | 4.02 |
| IL36A              | 4.52 | 5.33 | 4.16 |
| GRIA3              | 4.52 | 4.88 | 4.04 |
| SLC1A6             | 4.52 | 5.01 | 3.94 |
| TMEM229B           | 4.52 | 5.00 | 4.20 |
| C1orf189           | 4.52 | 4.97 | 4.03 |
| C2CD2L             | 4.52 | 4.80 | 4.12 |
| RTN4RL2            | 4.52 | 4.88 | 4.16 |
| PPARGC1B           | 4.52 | 4.84 | 4.08 |
| C11orf84           | 4.52 | 4.86 | 4.21 |
| GPR26              | 4.52 | 4.94 | 3.99 |
| MYCT1              | 4.52 | 5.73 | 2.80 |
| OTTHUMG00000155983 | 4.52 | 4.94 | 4.12 |
| HPX                | 4.52 | 4.88 | 3.84 |
| TMEM67             | 4.52 | 4.80 | 3.80 |
| RNA5SP332          | 4.52 | 5.54 | 3.68 |
| SNORD114-16        | 4.52 | 6.13 | 3.49 |
| OTTHUMG00000024161 | 4.52 | 4.90 | 4.06 |
| TRIM54             | 4.52 | 4.70 | 4.19 |
| OTTHUMG00000163345 | 4.52 | 5.26 | 4.11 |
| OTTHUMG00000150069 | 4.52 | 5.18 | 3.97 |
| MECR               | 4.52 | 5.00 | 4.15 |

|                    |      |      |      |
|--------------------|------|------|------|
| MEF2BNB-MEF2B      | 4.52 | 4.80 | 4.33 |
| CKMT1B             | 4.52 | 5.13 | 4.05 |
| AADA3L3            | 4.52 | 5.08 | 3.96 |
| GOLGA2P5           | 4.52 | 5.32 | 3.68 |
| OTTHUMG00000008375 | 4.52 | 4.75 | 4.25 |
| MAP3K7CL           | 4.52 | 4.94 | 4.04 |
| WRAP53             | 4.52 | 4.65 | 4.40 |
| ACHE               | 4.52 | 4.92 | 4.13 |
| NCLN               | 4.52 | 4.68 | 4.19 |
| C12orf66           | 4.52 | 4.97 | 4.14 |
| LCA5L              | 4.52 | 4.90 | 4.26 |
| OR6Y1              | 4.52 | 5.28 | 3.49 |
| C4orf19            | 4.52 | 5.05 | 4.27 |
| MAGEA8-AS1         | 4.52 | 4.87 | 4.17 |
| C2orf43            | 4.52 | 5.07 | 3.99 |
| FBXL12             | 4.52 | 4.78 | 3.90 |
| PNPLA1             | 4.52 | 4.69 | 4.28 |
| AKAP7              | 4.52 | 5.02 | 4.08 |
| MRI1               | 4.52 | 5.03 | 3.82 |
| ESPNL              | 4.52 | 5.34 | 3.68 |
| MEIS1-AS2          | 4.52 | 5.00 | 4.22 |
| SPOCK2             | 4.52 | 5.23 | 4.13 |
| PALM2-AKAP2        | 4.52 | 4.89 | 4.16 |
| TTC30A             | 4.52 | 5.10 | 4.15 |
| KCNA5              | 4.52 | 5.26 | 3.73 |
| RASGEF1A           | 4.52 | 4.96 | 3.95 |
| FNDC8              | 4.52 | 4.99 | 4.23 |
| C2orf57            | 4.52 | 5.23 | 3.98 |
| LIN54              | 4.52 | 4.81 | 4.12 |
| GFRA1              | 4.52 | 5.11 | 4.02 |
| ZNF281             | 4.52 | 5.01 | 4.08 |
| FGD3               | 4.52 | 5.17 | 3.99 |
| FLVCR1-AS1         | 4.52 | 5.24 | 3.99 |
| PSAPL1             | 4.51 | 4.72 | 4.37 |
| OTTHUMG00000165860 | 4.51 | 5.15 | 3.95 |
| BEST4              | 4.51 | 4.80 | 4.22 |
| GRIA2              | 4.51 | 5.11 | 3.73 |
| TBC1D24            | 4.51 | 4.76 | 4.20 |
| LIPG               | 4.51 | 4.91 | 4.22 |
| C14orf64           | 4.51 | 4.99 | 4.25 |
| DGKG               | 4.51 | 4.96 | 4.06 |
| LOC100128505       | 4.51 | 4.94 | 4.06 |
| NPBWR1             | 4.51 | 4.85 | 4.16 |
| MED25              | 4.51 | 4.82 | 4.15 |
| FGF12              | 4.51 | 5.15 | 3.97 |
| ABCG2              | 4.51 | 5.06 | 4.19 |
| FUNDC1             | 4.51 | 4.94 | 4.15 |
| PRM3               | 4.51 | 4.75 | 4.00 |
| C14orf180          | 4.51 | 4.98 | 4.23 |

|                    |      |      |      |
|--------------------|------|------|------|
| OTTHUMG00000167737 | 4.51 | 4.96 | 3.81 |
| LOC284798          | 4.51 | 4.85 | 4.06 |
| ABRA               | 4.51 | 4.88 | 4.02 |
| LOC100134361       | 4.51 | 4.89 | 4.21 |
| ZC3H10             | 4.51 | 4.78 | 4.23 |
| SNORA71B           | 4.51 | 5.52 | 3.28 |
| LOC400748          | 4.51 | 4.97 | 4.06 |
| LOC283177          | 4.51 | 4.94 | 3.90 |
| AMPD3              | 4.51 | 5.18 | 3.99 |
| OTTHUMG00000165780 | 4.51 | 5.09 | 3.93 |
| SLC35G2            | 4.51 | 4.80 | 4.22 |
| OTTHUMG00000016846 | 4.51 | 5.07 | 3.95 |
| OR1J2              | 4.51 | 5.17 | 4.08 |
| CTNS               | 4.51 | 4.74 | 4.16 |
| LOC100506257       | 4.51 | 4.89 | 3.99 |
| HECW1              | 4.51 | 4.93 | 4.19 |
| IRX1               | 4.51 | 4.85 | 4.12 |
| GRK4               | 4.51 | 4.73 | 4.20 |
| RPS6KA5            | 4.51 | 4.96 | 4.09 |
| KIAA0825           | 4.51 | 4.88 | 4.14 |
| DCDC2              | 4.51 | 4.81 | 4.00 |
| ZNF433             | 4.51 | 4.76 | 4.28 |
| LOC100129215       | 4.51 | 4.90 | 4.08 |
| PF4V1              | 4.51 | 5.06 | 3.97 |
| ALOX5              | 4.51 | 5.52 | 4.01 |
| OTTHUMG00000086463 | 4.51 | 4.94 | 4.08 |
| OTTHUMG00000169117 | 4.51 | 4.87 | 4.18 |
| FGF14              | 4.51 | 5.15 | 3.92 |
| OTTHUMG00000172569 | 4.51 | 4.82 | 4.11 |
| WFDC1              | 4.51 | 4.87 | 4.19 |
| NPPA               | 4.51 | 4.91 | 4.18 |
| GPR132             | 4.51 | 4.82 | 4.11 |
| FAIM3              | 4.51 | 4.73 | 4.10 |
| LOC100505639       | 4.51 | 5.18 | 4.30 |
| EFCAB1             | 4.51 | 5.13 | 3.46 |
| BTK                | 4.51 | 5.23 | 3.80 |
| CYP4A11            | 4.51 | 5.16 | 3.70 |
| MIXL1              | 4.51 | 4.86 | 4.14 |
| LOC285889          | 4.51 | 5.15 | 4.06 |
| PPP1R16B           | 4.51 | 4.92 | 4.02 |
| ARMC5              | 4.51 | 4.87 | 4.24 |
| BTN3A2             | 4.51 | 5.24 | 4.14 |
| RNA5SP415          | 4.51 | 4.98 | 3.81 |
| LRRC49             | 4.51 | 4.79 | 4.04 |
| LINC00649          | 4.51 | 4.90 | 4.14 |
| LRRN3              | 4.51 | 5.04 | 3.98 |
| C1orf105           | 4.51 | 4.96 | 3.95 |
| LHX8               | 4.51 | 5.05 | 4.02 |
| FAM151A            | 4.51 | 4.92 | 4.14 |

|                    |      |      |      |
|--------------------|------|------|------|
| ITPKC              | 4.51 | 4.90 | 3.97 |
| OTTHUMG00000162106 | 4.51 | 5.00 | 4.05 |
| MYOM1              | 4.51 | 4.80 | 3.94 |
| ACSM4              | 4.51 | 4.98 | 4.25 |
| HSF5               | 4.51 | 4.91 | 4.02 |
| RNLS               | 4.51 | 4.79 | 4.11 |
| RAPGEF4-AS1        | 4.51 | 5.01 | 4.04 |
| CD207              | 4.50 | 5.02 | 3.58 |
| B3GALT1            | 4.50 | 4.79 | 4.18 |
| CBFA2T3            | 4.50 | 4.76 | 4.13 |
| OTTHUMG00000164249 | 4.50 | 4.97 | 4.15 |
| CKB                | 4.50 | 5.16 | 3.49 |
| OTTHUMG00000018174 | 4.50 | 4.85 | 4.18 |
| DCAF4L2            | 4.50 | 5.04 | 3.97 |
| SNURFL             | 4.50 | 5.20 | 3.90 |
| LOC100506813       | 4.50 | 5.02 | 3.99 |
| LAMA1              | 4.50 | 4.69 | 4.31 |
| MAS1               | 4.50 | 4.84 | 4.21 |
| ZDHHC20-IT1        | 4.50 | 4.94 | 4.10 |
| MIR4326            | 4.50 | 5.23 | 3.06 |
| C8orf47            | 4.50 | 4.74 | 4.17 |
| COX6A2             | 4.50 | 5.00 | 3.95 |
| OTTHUMG00000168310 | 4.50 | 5.33 | 3.93 |
| CDPF1              | 4.50 | 4.83 | 4.10 |
| CENPBD1            | 4.50 | 4.71 | 4.19 |
| GADD45G            | 4.50 | 4.85 | 4.11 |
| WDR11-AS1          | 4.50 | 4.71 | 4.31 |
| AGRP               | 4.50 | 4.77 | 4.12 |
| SRBD1              | 4.50 | 4.95 | 4.02 |
| SWT1               | 4.50 | 5.04 | 3.96 |
| UMOD               | 4.50 | 4.96 | 3.88 |
| HPN-AS1            | 4.50 | 5.02 | 3.95 |
| DIEXF              | 4.50 | 4.73 | 4.07 |
| LOC100270680       | 4.50 | 4.92 | 3.88 |
| ASAH2              | 4.50 | 5.16 | 3.59 |
| NEFM               | 4.50 | 5.30 | 4.01 |
| OR6Q1              | 4.50 | 5.03 | 4.03 |
| CDH2               | 4.50 | 4.92 | 4.01 |
| WFDC10B            | 4.50 | 5.18 | 3.85 |
| UBL4A              | 4.50 | 4.82 | 4.15 |
| SP9                | 4.50 | 4.80 | 4.15 |
| KLHDC8A            | 4.50 | 4.76 | 4.05 |
| LINC00330          | 4.50 | 5.25 | 3.82 |
| SH2D7              | 4.50 | 5.15 | 4.04 |
| SLC12A9            | 4.50 | 4.81 | 4.17 |
| ACSS1              | 4.50 | 4.97 | 4.15 |
| ATG4A              | 4.50 | 4.79 | 3.69 |
| HLA-DRB1           | 4.50 | 8.23 | 1.97 |
| NME6               | 4.50 | 4.83 | 4.20 |

|                    |      |      |      |
|--------------------|------|------|------|
| GLS2               | 4.50 | 4.87 | 4.16 |
| PLCL1              | 4.50 | 5.13 | 3.71 |
| TRMT12             | 4.50 | 4.76 | 3.91 |
| NRGN               | 4.50 | 4.90 | 3.97 |
| NPPC               | 4.50 | 4.92 | 4.09 |
| OTTHUMG00000176979 | 4.50 | 4.76 | 4.29 |
| HNRNPKP3           | 4.50 | 4.83 | 4.06 |
| OTTHUMG00000004188 | 4.50 | 5.08 | 4.10 |
| GP5                | 4.50 | 4.83 | 4.25 |
| SEMA6B             | 4.50 | 4.85 | 4.20 |
| LOC100506858       | 4.50 | 5.00 | 4.02 |
| IGLV7-43           | 4.50 | 4.78 | 4.29 |
| HBM                | 4.50 | 4.83 | 3.97 |
| FAM159A            | 4.50 | 4.93 | 4.17 |
| TMEM129            | 4.50 | 4.79 | 4.06 |
| FLG                | 4.50 | 5.10 | 4.21 |
| RNF112             | 4.50 | 4.75 | 4.26 |
| LOC100996624       | 4.50 | 5.87 | 3.85 |
| RNF216-IT1         | 4.50 | 5.04 | 4.18 |
| RYR1               | 4.50 | 4.87 | 4.20 |
| ZNF519             | 4.50 | 5.08 | 3.82 |
| NEIL2              | 4.50 | 4.99 | 4.04 |
| RFPL1S             | 4.50 | 5.13 | 3.76 |
| OTTHUMG00000057525 | 4.50 | 4.94 | 4.19 |
| WHAMMP2            | 4.50 | 4.92 | 3.88 |
| TANGO2             | 4.50 | 4.93 | 4.20 |
| RNF216P1           | 4.50 | 5.11 | 3.93 |
| KCNQ5              | 4.50 | 5.21 | 3.69 |
| LOC100996665       | 4.50 | 4.81 | 4.28 |
| HENMT1             | 4.50 | 4.77 | 3.94 |
| SFRP5              | 4.50 | 4.71 | 4.17 |
| SNORD114-26        | 4.50 | 5.56 | 3.25 |
| RPTN               | 4.50 | 5.14 | 4.21 |
| TFEB               | 4.50 | 4.97 | 4.03 |
| MIR3162            | 4.50 | 5.14 | 3.50 |
| LOC286184          | 4.50 | 4.78 | 4.16 |
| BTN2A3P            | 4.50 | 4.82 | 3.98 |
| FES                | 4.50 | 4.94 | 4.03 |
| AGAP2-AS1          | 4.50 | 5.30 | 4.01 |
| DHH                | 4.50 | 5.01 | 4.14 |
| SGSM3              | 4.50 | 4.85 | 4.13 |
| ATP1A2             | 4.50 | 4.89 | 4.17 |
| NKRF               | 4.50 | 4.83 | 4.19 |
| KIRREL3-AS3        | 4.50 | 4.84 | 4.10 |
| PDZD8              | 4.50 | 5.08 | 3.95 |
| TRBV5-7            | 4.50 | 4.82 | 4.01 |
| TIGIT              | 4.50 | 4.84 | 3.70 |
| C19orf54           | 4.50 | 4.87 | 4.11 |
| OTTHUMG00000154157 | 4.50 | 4.98 | 3.88 |



|                    |      |      |      |
|--------------------|------|------|------|
| PNMT               | 4.50 | 4.73 | 4.26 |
| SHC2               | 4.50 | 4.91 | 3.54 |
| FLJ14082           | 4.50 | 5.10 | 4.00 |
| BACH1-IT2          | 4.50 | 5.04 | 3.98 |
| CLEC10A            | 4.50 | 4.96 | 4.02 |
| TMPRSS3            | 4.50 | 4.84 | 4.05 |
| KY                 | 4.49 | 4.81 | 4.20 |
| RHPN1              | 4.49 | 4.89 | 4.01 |
| FANCI              | 4.49 | 5.07 | 3.80 |
| MMP28              | 4.49 | 4.93 | 4.20 |
| CYP2D7P1           | 4.49 | 5.45 | 3.88 |
| OMG                | 4.49 | 5.30 | 3.93 |
| MIR4532            | 4.49 | 5.48 | 4.05 |
| OTTHUMG00000152531 | 4.49 | 5.64 | 3.79 |
| GPR114             | 4.49 | 4.74 | 4.23 |
| CCBL1              | 4.49 | 4.62 | 4.38 |
| HNRNPLL            | 4.49 | 5.40 | 3.99 |
| OR1B1              | 4.49 | 4.76 | 4.29 |
| RTN2               | 4.49 | 4.76 | 4.29 |
| CCDC108            | 4.49 | 4.87 | 4.20 |
| C3orf56            | 4.49 | 5.15 | 3.93 |
| LOC100505964       | 4.49 | 5.19 | 4.06 |
| OTTHUMG00000172091 | 4.49 | 5.33 | 3.82 |
| LOC146880          | 4.49 | 5.49 | 3.81 |
| PGLYRP1            | 4.49 | 4.83 | 4.24 |
| OTTHUMG00000183152 | 4.49 | 5.33 | 3.82 |
| FAM189A1           | 4.49 | 4.77 | 4.24 |
| METTL20            | 4.49 | 4.85 | 4.21 |
| OTTHUMG00000162135 | 4.49 | 5.14 | 4.00 |
| FAM118A            | 4.49 | 4.79 | 4.06 |
| IFNLR1             | 4.49 | 5.01 | 4.03 |
| OTTHUMG00000176973 | 4.49 | 4.86 | 4.24 |
| CD5L               | 4.49 | 5.07 | 3.88 |
| RPL23AP7           | 4.49 | 5.29 | 4.10 |
| GUCA1B             | 4.49 | 5.11 | 4.07 |
| MAPK8IP2           | 4.49 | 4.70 | 3.99 |
| OTTHUMG00000037519 | 4.49 | 4.91 | 4.08 |
| DQX1               | 4.49 | 4.82 | 4.08 |
| IGKV2-29           | 4.49 | 5.08 | 4.19 |
| PPP1R14D           | 4.49 | 5.19 | 4.07 |
| PES1               | 4.49 | 4.84 | 3.64 |
| OTTHUMG00000180894 | 4.49 | 4.91 | 4.29 |
| OTTHUMG00000171281 | 4.49 | 4.97 | 4.05 |
| UGGT2-IT1          | 4.49 | 5.22 | 3.90 |
| CAPN13             | 4.49 | 4.85 | 3.88 |
| LOC100505978       | 4.49 | 4.91 | 3.94 |
| LOC100287497       | 4.49 | 4.96 | 4.19 |
| ZNF853             | 4.49 | 5.01 | 4.19 |
| OTTHUMG00000017648 | 4.49 | 4.97 | 4.08 |

|                           |      |      |      |
|---------------------------|------|------|------|
| <i>IQGAP2</i>             | 4.49 | 5.12 | 3.81 |
| <i>PRH2</i>               | 4.49 | 4.97 | 3.94 |
| <i>OR51S1</i>             | 4.49 | 5.24 | 4.21 |
| <i>OTTHUMG00000172196</i> | 4.49 | 4.86 | 4.21 |
| <i>CD300LF</i>            | 4.49 | 4.72 | 4.02 |
| <i>RNA5SP289</i>          | 4.49 | 5.28 | 3.50 |
| <i>B3GNT7</i>             | 4.49 | 4.78 | 4.20 |
| <i>LOC729658</i>          | 4.49 | 4.88 | 4.07 |
| <i>FOX M1</i>             | 4.49 | 4.87 | 3.95 |
| <i>MIR135B</i>            | 4.49 | 4.91 | 4.25 |
| <i>KRTAP10-1</i>          | 4.49 | 4.78 | 3.83 |
| <i>MAML3</i>              | 4.49 | 4.96 | 4.06 |
| <i>CTBP1-AS2</i>          | 4.49 | 4.87 | 4.13 |
| <i>MGC39545</i>           | 4.49 | 4.92 | 3.87 |
| <i>LIPT2</i>              | 4.49 | 4.83 | 4.24 |
| <i>BCDIN3D-AS1</i>        | 4.49 | 4.88 | 3.86 |
| <i>ISLR2</i>              | 4.49 | 4.94 | 4.08 |
| <i>POLE4</i>              | 4.49 | 5.20 | 4.08 |
| <i>RFC2</i>               | 4.49 | 4.77 | 3.95 |
| <i>LOC729987</i>          | 4.49 | 4.85 | 4.17 |
| <i>KIAA1522</i>           | 4.49 | 4.90 | 4.27 |
| <i>OR2L13</i>             | 4.49 | 5.18 | 4.05 |
| <i>PLAC4</i>              | 4.49 | 4.90 | 4.15 |
| <i>POLR3G</i>             | 4.49 | 4.83 | 4.08 |
| <i>C4orf50</i>            | 4.49 | 5.05 | 3.94 |
| <i>TRIM35</i>             | 4.49 | 4.61 | 4.35 |
| <i>N4BP3</i>              | 4.49 | 5.41 | 3.84 |
| <i>LINC00925</i>          | 4.49 | 4.75 | 4.17 |
| <i>PP13439</i>            | 4.49 | 4.80 | 4.24 |
| <i>MFSD1</i>              | 4.49 | 4.92 | 4.04 |
| <i>PPP1R2</i>             | 4.49 | 4.79 | 3.91 |
| <i>GGNBP1</i>             | 4.49 | 5.15 | 3.97 |
| <i>CYP11B2</i>            | 4.49 | 5.21 | 3.69 |
| <i>MIR509-1</i>           | 4.49 | 5.74 | 3.97 |
| <i>MOGAT3</i>             | 4.49 | 4.70 | 4.30 |
| <i>RBMY1D</i>             | 4.49 | 5.63 | 3.29 |
| <i>APOBEC3D</i>           | 4.49 | 5.07 | 3.85 |
| <i>SMYD5</i>              | 4.49 | 4.79 | 4.07 |
| <i>CDHR5</i>              | 4.49 | 4.71 | 4.28 |
| <i>LOC283693</i>          | 4.49 | 5.18 | 3.91 |
| <i>SNHG1</i>              | 4.49 | 4.80 | 3.90 |
| <i>EIF5A2</i>             | 4.49 | 5.20 | 3.58 |
| <i>OXGR1</i>              | 4.49 | 5.13 | 4.10 |
| <i>PRAMEF17</i>           | 4.49 | 4.96 | 3.95 |
| <i>MLC1</i>               | 4.49 | 4.79 | 4.11 |
| <i>LOC729995</i>          | 4.48 | 5.09 | 3.97 |
| <i>PRTG</i>               | 4.48 | 4.84 | 4.01 |
| <i>PTX3</i>               | 4.48 | 5.30 | 3.96 |
| <i>OR2M4</i>              | 4.48 | 5.22 | 4.16 |

|                     |      |      |      |
|---------------------|------|------|------|
| GAL3ST1             | 4.48 | 4.79 | 4.11 |
| OTTHUMG00000010584  | 4.48 | 4.83 | 4.15 |
| KRTAP12-2           | 4.48 | 4.76 | 4.15 |
| SNORA64             | 4.48 | 4.98 | 3.88 |
| NPTX1               | 4.48 | 4.94 | 4.21 |
| LINC00475           | 4.48 | 5.43 | 3.87 |
| LOC286059           | 4.48 | 4.84 | 4.09 |
| SYN3                | 4.48 | 4.95 | 3.73 |
| TSPY26P             | 4.48 | 5.00 | 4.17 |
| FAM151B             | 4.48 | 5.03 | 3.89 |
| CD209               | 4.48 | 5.19 | 3.54 |
| OPN5                | 4.48 | 4.82 | 3.97 |
| OTTHUMG000000151090 | 4.48 | 5.11 | 3.55 |
| AFMID               | 4.48 | 4.79 | 4.12 |
| CTSL2               | 4.48 | 4.81 | 4.22 |
| SIK1                | 4.48 | 4.87 | 4.06 |
| FUK                 | 4.48 | 4.86 | 4.25 |
| RAD51-AS1           | 4.48 | 5.08 | 3.80 |
| LINC00900           | 4.48 | 5.16 | 3.86 |
| LOC100240734        | 4.48 | 5.52 | 3.57 |
| LOC643723           | 4.48 | 4.69 | 4.24 |
| DIO3                | 4.48 | 5.15 | 4.08 |
| CSNK1A1L            | 4.48 | 5.02 | 3.93 |
| ZNF32-AS2           | 4.48 | 4.68 | 4.25 |
| NKIRAS1             | 4.48 | 4.87 | 4.10 |
| AMN                 | 4.48 | 4.77 | 4.14 |
| EVI5L               | 4.48 | 4.78 | 4.26 |
| ADAMTS3             | 4.48 | 4.87 | 4.03 |
| LOC100507166        | 4.48 | 4.83 | 4.14 |
| NDNL2               | 4.48 | 4.99 | 3.80 |
| LOC284395           | 4.48 | 4.90 | 4.07 |
| OTTHUMG000000181998 | 4.48 | 4.85 | 3.99 |
| AK9                 | 4.48 | 4.79 | 4.16 |
| BSND                | 4.48 | 4.80 | 4.05 |
| LOC442028           | 4.48 | 5.06 | 4.04 |
| STX18-IT1           | 4.48 | 4.81 | 4.05 |
| POLB                | 4.48 | 4.80 | 4.10 |
| FAM162B             | 4.48 | 4.96 | 3.96 |
| OTTHUMG000000164822 | 4.48 | 4.88 | 4.18 |
| TSGA13              | 4.48 | 4.72 | 4.15 |
| ZNF883              | 4.48 | 4.76 | 4.01 |
| C22orf34            | 4.48 | 4.93 | 4.15 |
| S1PR4               | 4.48 | 5.01 | 3.87 |
| ODF3                | 4.48 | 5.06 | 3.76 |
| PHOX2A              | 4.48 | 4.72 | 4.26 |
| ALMS1P              | 4.48 | 5.30 | 4.12 |
| ITPR1-AS1           | 4.48 | 4.95 | 4.00 |
| RPP38               | 4.48 | 4.79 | 4.25 |
| PIGW                | 4.48 | 4.72 | 4.13 |

|                    |      |      |      |
|--------------------|------|------|------|
| LOC100505812       | 4.48 | 5.15 | 3.76 |
| OTTHUMG00000003682 | 4.48 | 4.92 | 3.72 |
| APOBEC3H           | 4.48 | 4.87 | 3.78 |
| SHD                | 4.48 | 4.82 | 4.15 |
| EMX2OS             | 4.48 | 4.91 | 4.08 |
| AVPR2              | 4.48 | 4.64 | 4.33 |
| A1BG-AS1           | 4.48 | 4.98 | 4.02 |
| BACH1-IT3          | 4.48 | 4.81 | 4.13 |
| ELP6               | 4.48 | 4.73 | 4.04 |
| LOC100506609       | 4.48 | 4.91 | 4.26 |
| OR2AJ1             | 4.48 | 5.20 | 3.77 |
| OTTHUMG00000161161 | 4.48 | 5.02 | 3.91 |
| LOC100652739       | 4.48 | 4.78 | 4.17 |
| MIR3187            | 4.48 | 5.07 | 4.00 |
| APEX2              | 4.48 | 4.92 | 4.21 |
| RIC8B              | 4.48 | 4.82 | 4.25 |
| DAGLA              | 4.48 | 4.80 | 4.17 |
| TAF6               | 4.48 | 4.80 | 3.87 |
| MAMSTR             | 4.48 | 4.79 | 4.07 |
| AOAH               | 4.48 | 4.88 | 4.04 |
| SKP1P2             | 4.48 | 5.07 | 3.99 |
| PRKX-AS1           | 4.48 | 4.77 | 3.91 |
| CLSTN2             | 4.48 | 5.03 | 4.10 |
| C6orf195           | 4.47 | 4.71 | 4.16 |
| TRIM10             | 4.47 | 4.69 | 4.12 |
| LINC00514          | 4.47 | 4.75 | 4.17 |
| FOXL1              | 4.47 | 5.05 | 3.77 |
| MIR648             | 4.47 | 5.00 | 3.96 |
| LINC00685          | 4.47 | 5.01 | 3.60 |
| LOC400499          | 4.47 | 5.08 | 4.25 |
| MIR600HG           | 4.47 | 4.69 | 4.15 |
| C8orf69            | 4.47 | 4.87 | 4.14 |
| OTTHUMG00000169714 | 4.47 | 4.97 | 4.11 |
| FTSJD1             | 4.47 | 4.69 | 4.04 |
| TRIM69             | 4.47 | 4.79 | 4.21 |
| B3GNT4             | 4.47 | 5.02 | 4.02 |
| MUC2               | 4.47 | 4.88 | 4.20 |
| USP17L23           | 4.47 | 4.87 | 4.12 |
| NEU3               | 4.47 | 5.04 | 4.17 |
| LTK                | 4.47 | 4.75 | 3.92 |
| PRPH2              | 4.47 | 4.87 | 3.89 |
| OTTHUMG00000172123 | 4.47 | 4.94 | 3.94 |
| OR7G1              | 4.47 | 5.27 | 3.28 |
| PWRN1              | 4.47 | 5.24 | 3.66 |
| LDB3               | 4.47 | 4.83 | 4.13 |
| OTTHUMG00000153107 | 4.47 | 4.64 | 4.10 |
| PDE9A              | 4.47 | 5.09 | 3.87 |
| PRSS45             | 4.47 | 5.01 | 4.23 |
| CACNG8             | 4.47 | 4.91 | 3.95 |

|                    |      |      |      |
|--------------------|------|------|------|
| OTTHUMG00000021161 | 4.47 | 4.75 | 4.14 |
| SCARNA8            | 4.47 | 5.15 | 3.32 |
| MIR4710            | 4.47 | 5.18 | 3.74 |
| LOC100506459       | 4.47 | 5.10 | 4.13 |
| GAN                | 4.47 | 4.88 | 3.71 |
| CCDC114            | 4.47 | 4.79 | 4.01 |
| BRCA2              | 4.47 | 4.92 | 3.97 |
| SNORD91A           | 4.47 | 5.01 | 3.95 |
| PALM3              | 4.47 | 5.22 | 4.08 |
| ASB18              | 4.47 | 4.90 | 4.02 |
| POPDC2             | 4.47 | 5.04 | 4.11 |
| MBD3               | 4.47 | 4.72 | 3.87 |
| SGOL2              | 4.47 | 4.99 | 4.12 |
| C11orf92           | 4.47 | 5.41 | 3.66 |
| FLJ30403           | 4.47 | 4.90 | 4.15 |
| OTTHUMG00000151764 | 4.47 | 5.34 | 3.86 |
| EFCAB6             | 4.47 | 4.73 | 4.12 |
| ADPRHL2            | 4.47 | 4.88 | 4.10 |
| OTTHUMG00000171100 | 4.47 | 5.13 | 3.71 |
| MS4A15             | 4.47 | 4.80 | 4.08 |
| B4GALNT2           | 4.47 | 4.96 | 4.04 |
| KLHL25             | 4.47 | 4.97 | 4.22 |
| KIF24              | 4.47 | 4.95 | 3.91 |
| CREM               | 4.47 | 4.96 | 4.10 |
| LOC644656          | 4.47 | 4.86 | 4.23 |
| HSD11B1L           | 4.47 | 4.68 | 4.24 |
| HHEX               | 4.47 | 4.90 | 3.92 |
| ARHGAP11A          | 4.47 | 5.29 | 3.23 |
| HAS2-AS1           | 4.47 | 4.99 | 4.14 |
| OTTHUMG00000163673 | 4.47 | 4.87 | 4.17 |
| BHLHE22            | 4.47 | 4.86 | 4.19 |
| RAB3B              | 4.47 | 4.87 | 4.08 |
| LOC729173          | 4.47 | 5.07 | 4.19 |
| UTP15              | 4.47 | 4.95 | 4.08 |
| FBXO31             | 4.47 | 4.77 | 4.16 |
| OTTHUMG00000168693 | 4.47 | 4.84 | 4.00 |
| CRHR2              | 4.47 | 5.05 | 4.08 |
| GPA33              | 4.47 | 5.12 | 4.00 |
| GHSR               | 4.47 | 4.88 | 3.95 |
| HEXDC-IT1          | 4.47 | 5.26 | 3.72 |
| SFR1               | 4.47 | 4.71 | 3.98 |
| DAPK2              | 4.47 | 5.01 | 3.82 |
| OTTHUMG00000170315 | 4.47 | 4.75 | 4.17 |
| LOC100505504       | 4.47 | 4.85 | 4.04 |
| OTTHUMG00000017549 | 4.47 | 4.84 | 3.85 |
| ABCG8              | 4.47 | 4.96 | 3.67 |
| CCNYL3             | 4.47 | 4.84 | 4.13 |
| MIR4675            | 4.47 | 4.70 | 4.01 |
| POTEF              | 4.47 | 5.19 | 4.21 |

|                    |      |      |      |
|--------------------|------|------|------|
| GDF6               | 4.47 | 5.13 | 3.79 |
| OTTHUMG00000017570 | 4.47 | 4.92 | 3.94 |
| LPL                | 4.47 | 5.20 | 3.80 |
| MSRA               | 4.47 | 4.83 | 4.10 |
| FREM2-AS1          | 4.46 | 5.17 | 3.88 |
| SOWAHC             | 4.46 | 4.89 | 4.13 |
| LINC00544          | 4.46 | 4.77 | 4.19 |
| SOX17              | 4.46 | 5.35 | 4.03 |
| MTHFR              | 4.46 | 4.77 | 4.10 |
| PAGE5              | 4.46 | 5.61 | 3.34 |
| AKR7A3             | 4.46 | 4.87 | 4.10 |
| GCLC               | 4.46 | 4.80 | 4.15 |
| SACS-AS1           | 4.46 | 4.81 | 4.14 |
| TFCP2L1            | 4.46 | 5.14 | 3.95 |
| UBE3D              | 4.46 | 4.83 | 4.06 |
| LOC100527964       | 4.46 | 4.73 | 4.10 |
| GPR152             | 4.46 | 5.08 | 3.96 |
| GUCY2D             | 4.46 | 4.92 | 4.04 |
| LAX1               | 4.46 | 4.84 | 4.00 |
| CHDH               | 4.46 | 5.10 | 3.60 |
| OTTHUMG00000019201 | 4.46 | 5.21 | 3.88 |
| SLC16A8            | 4.46 | 4.90 | 4.03 |
| CCRL1              | 4.46 | 4.95 | 4.19 |
| RHO                | 4.46 | 4.81 | 4.07 |
| NUP54              | 4.46 | 4.89 | 3.70 |
| ALS2CL             | 4.46 | 4.90 | 4.07 |
| KCNJ6              | 4.46 | 4.91 | 3.97 |
| ASIP               | 4.46 | 5.07 | 3.58 |
| IGFL1              | 4.46 | 4.98 | 4.00 |
| LIPT1              | 4.46 | 5.13 | 3.95 |
| OTTHUMG00000156285 | 4.46 | 4.78 | 4.20 |
| MYH7               | 4.46 | 4.68 | 4.22 |
| C20orf195          | 4.46 | 4.77 | 4.12 |
| MED14-AS1          | 4.46 | 4.95 | 3.85 |
| DNAJC3-AS1         | 4.46 | 5.05 | 3.97 |
| OTTHUMG00000166037 | 4.46 | 4.94 | 3.89 |
| DKFZp434J0226      | 4.46 | 4.66 | 4.13 |
| CASR               | 4.46 | 4.91 | 4.22 |
| KRTAP5-4           | 4.46 | 5.23 | 3.64 |
| RNA5SP366          | 4.46 | 5.05 | 3.65 |
| PDZRN3-AS1         | 4.46 | 4.71 | 4.09 |
| BCL7C              | 4.46 | 4.74 | 4.22 |
| OTTHUMG00000021064 | 4.46 | 4.83 | 4.04 |
| LOC100506458       | 4.46 | 5.19 | 3.91 |
| F3                 | 4.46 | 6.12 | 3.43 |
| BTBD3              | 4.46 | 4.69 | 3.97 |
| OTTHUMG00000153019 | 4.46 | 4.87 | 4.09 |
| OTTHUMG00000168461 | 4.46 | 5.12 | 3.84 |
| PAX5               | 4.46 | 4.64 | 4.22 |

|                    |      |      |      |
|--------------------|------|------|------|
| LINC00886          | 4.46 | 5.27 | 3.84 |
| BHLHB9             | 4.46 | 4.93 | 3.93 |
| MIR4660            | 4.46 | 4.94 | 4.03 |
| OR10G8             | 4.46 | 5.28 | 3.85 |
| TMEM133            | 4.46 | 4.89 | 3.75 |
| RSPH9              | 4.46 | 4.95 | 4.16 |
| FIZ1               | 4.46 | 4.98 | 4.14 |
| MIR4302            | 4.46 | 4.98 | 3.21 |
| OTTHUMG00000015768 | 4.46 | 5.05 | 3.65 |
| CIDEC              | 4.46 | 5.67 | 3.77 |
| CWF19L1            | 4.46 | 4.90 | 3.94 |
| KCNMB4             | 4.46 | 4.78 | 4.06 |
| NAGPA              | 4.46 | 4.87 | 3.84 |
| RCSD1              | 4.46 | 4.83 | 3.86 |
| IGLJ5              | 4.46 | 5.28 | 3.86 |
| NUF2               | 4.46 | 4.91 | 4.04 |
| LOC100506641       | 4.46 | 4.97 | 4.12 |
| PTGDR              | 4.46 | 5.26 | 3.81 |
| DDX60              | 4.46 | 5.27 | 3.82 |
| RASSF5             | 4.46 | 4.86 | 3.90 |
| ADCY5              | 4.46 | 4.87 | 4.21 |
| OTTHUMG00000017599 | 4.46 | 5.15 | 3.95 |
| FAM83C             | 4.46 | 5.27 | 3.93 |
| LRRC73             | 4.46 | 4.98 | 4.19 |
| GPR83              | 4.46 | 5.02 | 3.85 |
| GUCA1A             | 4.46 | 4.93 | 3.80 |
| HOXA3              | 4.46 | 4.69 | 4.22 |
| MVK                | 4.45 | 4.89 | 3.81 |
| CDK2AP2            | 4.45 | 4.92 | 3.90 |
| LOC389199          | 4.45 | 4.68 | 4.13 |
| HN1                | 4.45 | 5.19 | 3.86 |
| MIR377             | 4.45 | 5.38 | 3.25 |
| MAPT-IT1           | 4.45 | 5.51 | 4.01 |
| TOX3               | 4.45 | 4.79 | 4.00 |
| ALOX15P1           | 4.45 | 5.26 | 3.75 |
| CHD5               | 4.45 | 4.71 | 4.00 |
| TTY16              | 4.45 | 5.07 | 3.84 |
| LOC550112          | 4.45 | 4.83 | 4.21 |
| JAK3               | 4.45 | 4.86 | 3.62 |
| LOC100128770       | 4.45 | 4.83 | 4.06 |
| WNT7B              | 4.45 | 4.83 | 4.19 |
| LINC00324          | 4.45 | 4.83 | 4.20 |
| OTTHUMG00000150946 | 4.45 | 5.13 | 4.06 |
| ABCA9              | 4.45 | 4.99 | 3.37 |
| DKFZp451A211       | 4.45 | 5.42 | 3.91 |
| IQCE               | 4.45 | 4.85 | 4.11 |
| SASH3              | 4.45 | 4.97 | 3.99 |
| RDH12              | 4.45 | 5.16 | 3.98 |
| MCM8               | 4.45 | 4.92 | 3.90 |

|                    |      |      |      |
|--------------------|------|------|------|
| TRAPPC2            | 4.45 | 5.33 | 3.98 |
| GREM2              | 4.45 | 4.79 | 4.07 |
| MYO1G              | 4.45 | 4.91 | 4.11 |
| AGAP1-IT1          | 4.45 | 4.77 | 3.93 |
| OTTHUMG00000020646 | 4.45 | 4.75 | 3.85 |
| RNF32              | 4.45 | 4.75 | 4.13 |
| SPC25              | 4.45 | 5.01 | 4.23 |
| LOC400043          | 4.45 | 4.78 | 4.15 |
| MGC12916           | 4.45 | 5.23 | 3.42 |
| ARG1               | 4.45 | 4.72 | 4.16 |
| LMO3               | 4.45 | 5.21 | 3.91 |
| LOC90246           | 4.45 | 5.12 | 3.95 |
| IL1R2              | 4.45 | 5.09 | 4.10 |
| SLC10A1            | 4.45 | 4.86 | 4.10 |
| LRRC39             | 4.45 | 4.80 | 4.11 |
| NTN3               | 4.45 | 4.81 | 4.01 |
| RBMY1B             | 4.45 | 5.59 | 3.32 |
| ITPRIPL1           | 4.45 | 5.03 | 3.95 |
| OTTHUMG00000020189 | 4.45 | 4.80 | 4.01 |
| ELL                | 4.45 | 5.13 | 3.97 |
| SCN10A             | 4.45 | 4.97 | 3.75 |
| USP12-AS2          | 4.45 | 5.11 | 3.69 |
| CHD7               | 4.45 | 4.69 | 4.24 |
| KCNH4              | 4.45 | 4.83 | 3.84 |
| NUSAP1             | 4.45 | 4.95 | 4.09 |
| PTPRN2             | 4.45 | 4.82 | 4.03 |
| PEX10              | 4.45 | 4.79 | 4.19 |
| LOC339529          | 4.45 | 4.81 | 4.13 |
| FAM218A            | 4.45 | 4.88 | 4.05 |
| COQ5               | 4.45 | 4.87 | 4.23 |
| PCDHB7             | 4.45 | 5.09 | 3.78 |
| KIAA1614           | 4.45 | 5.02 | 3.70 |
| GRID1-AS1          | 4.45 | 4.97 | 3.95 |
| CHAC1              | 4.45 | 4.87 | 4.08 |
| UQCRB              | 4.45 | 4.63 | 3.94 |
| MAPRE3             | 4.45 | 4.73 | 4.20 |
| TBC1D16            | 4.45 | 4.87 | 3.79 |
| OR51G1             | 4.45 | 5.26 | 3.98 |
| LOC728752          | 4.45 | 4.96 | 3.88 |
| FAM167A            | 4.45 | 4.67 | 4.30 |
| C20orf166          | 4.45 | 4.76 | 4.15 |
| FLJ45248           | 4.45 | 4.99 | 4.02 |
| TAGAP              | 4.45 | 5.33 | 4.00 |
| OR2T2              | 4.45 | 5.13 | 3.91 |
| MIR23A             | 4.45 | 4.77 | 4.10 |
| CASKIN1            | 4.45 | 4.89 | 4.09 |
| SDHAF1             | 4.45 | 4.88 | 4.03 |
| DAO                | 4.45 | 4.87 | 4.02 |
| MYCBPAP            | 4.45 | 5.25 | 3.96 |



|                    |      |      |      |
|--------------------|------|------|------|
| LOC340073          | 4.45 | 4.77 | 4.25 |
| MS4A18             | 4.45 | 5.22 | 4.02 |
| SYT10              | 4.45 | 4.89 | 3.95 |
| MRS2P2             | 4.45 | 5.16 | 3.59 |
| LINC00282          | 4.45 | 4.80 | 3.87 |
| RPL3L              | 4.45 | 4.85 | 4.17 |
| CTU1               | 4.44 | 4.95 | 4.12 |
| CA8                | 4.44 | 4.91 | 4.09 |
| RNA5SP431          | 4.44 | 5.02 | 3.68 |
| C1QTNF4            | 4.44 | 4.74 | 4.07 |
| MMP1               | 4.44 | 7.47 | 2.94 |
| PMS2CL             | 4.44 | 5.08 | 3.65 |
| SPATA31E1          | 4.44 | 4.84 | 4.20 |
| LOC285540          | 4.44 | 5.22 | 3.62 |
| CCT6B              | 4.44 | 4.84 | 4.07 |
| GPR37L1            | 4.44 | 4.74 | 4.04 |
| GTDC1              | 4.44 | 5.06 | 3.51 |
| C9orf163           | 4.44 | 4.64 | 4.22 |
| CCR1               | 4.44 | 5.47 | 3.89 |
| CXorf38            | 4.44 | 4.73 | 3.97 |
| C15orf53           | 4.44 | 5.24 | 3.95 |
| ZNF630-AS1         | 4.44 | 5.08 | 4.01 |
| RALGPS2            | 4.44 | 4.82 | 4.00 |
| NPR3               | 4.44 | 4.80 | 3.95 |
| OTTHUMG00000032279 | 4.44 | 5.04 | 3.94 |
| OTTHUMG00000059450 | 4.44 | 4.90 | 4.02 |
| RASA3-IT1          | 4.44 | 4.68 | 4.20 |
| RPS6KB2            | 4.44 | 4.72 | 4.19 |
| PIP5KL1            | 4.44 | 4.74 | 4.26 |
| OTTHUMG00000165544 | 4.44 | 4.80 | 4.13 |
| SNORD115-44        | 4.44 | 5.56 | 3.29 |
| OTTHUMG00000015255 | 4.44 | 5.39 | 3.84 |
| ACMSD              | 4.44 | 4.91 | 4.13 |
| PHF6               | 4.44 | 5.07 | 3.72 |
| LOC283575          | 4.44 | 4.90 | 3.92 |
| MPZ                | 4.44 | 4.86 | 4.25 |
| OTTHUMG00000017561 | 4.44 | 5.00 | 4.02 |
| FHAD1              | 4.44 | 4.89 | 4.01 |
| LOC100652824       | 4.44 | 4.90 | 3.95 |
| KCND1              | 4.44 | 4.81 | 3.88 |
| MRM1               | 4.44 | 4.98 | 3.58 |
| LINC00415          | 4.44 | 4.81 | 3.96 |
| PTDSS2             | 4.44 | 4.74 | 3.96 |
| NXPE2              | 4.44 | 5.45 | 3.44 |
| OTTHUMG00000012023 | 4.44 | 5.14 | 3.74 |
| HMX1               | 4.44 | 4.85 | 4.07 |
| MIR563             | 4.44 | 4.82 | 4.07 |
| NMU                | 4.44 | 4.90 | 4.11 |
| EFNA2              | 4.44 | 4.88 | 3.99 |

|                    |      |      |      |
|--------------------|------|------|------|
| SPC24              | 4.44 | 4.72 | 3.94 |
| TBC1D30            | 4.44 | 4.81 | 3.96 |
| ZNF615             | 4.44 | 4.87 | 3.79 |
| KPRP               | 4.44 | 5.03 | 3.87 |
| SPN                | 4.44 | 4.85 | 4.13 |
| AMDHD1             | 4.44 | 5.18 | 3.84 |
| ACPT               | 4.44 | 4.79 | 4.01 |
| MXD3               | 4.44 | 4.92 | 3.83 |
| CECR2              | 4.44 | 5.01 | 4.00 |
| ACVR1C             | 4.44 | 4.74 | 4.18 |
| LINC00593          | 4.44 | 4.71 | 4.15 |
| THBD               | 4.44 | 4.64 | 4.20 |
| KRT18P10           | 4.44 | 4.85 | 3.80 |
| FNDC9              | 4.44 | 4.87 | 3.95 |
| PLA2G4F            | 4.44 | 4.94 | 4.02 |
| PYGO1              | 4.44 | 4.70 | 4.11 |
| RNY4P16            | 4.44 | 5.42 | 3.51 |
| INA                | 4.44 | 4.79 | 4.06 |
| LOC100286922       | 4.44 | 5.28 | 3.93 |
| ANK1               | 4.44 | 4.68 | 4.14 |
| HBQ1               | 4.44 | 4.90 | 3.98 |
| CCR2               | 4.44 | 4.84 | 3.95 |
| TACR2              | 4.44 | 4.78 | 4.03 |
| LOC339807          | 4.44 | 5.02 | 4.02 |
| OTTHUMG00000155618 | 4.44 | 5.06 | 3.61 |
| ARFGAP2            | 4.44 | 4.79 | 3.89 |
| PLAC1              | 4.44 | 4.62 | 4.11 |
| C11orf86           | 4.44 | 4.99 | 4.10 |
| AGMAT              | 4.44 | 4.98 | 3.89 |
| IL2RG              | 4.44 | 5.15 | 3.97 |
| OTTHUMG00000169251 | 4.44 | 4.94 | 4.04 |
| OR10A4             | 4.44 | 4.91 | 3.87 |
| LINC00667          | 4.44 | 4.84 | 3.73 |
| DPY19L2P2          | 4.44 | 5.23 | 3.95 |
| RAX2               | 4.44 | 5.37 | 3.74 |
| OTTHUMG00000172230 | 4.43 | 4.77 | 4.13 |
| LINC00116          | 4.43 | 4.78 | 4.05 |
| OTTHUMG00000173226 | 4.43 | 5.19 | 3.83 |
| SIM2               | 4.43 | 4.66 | 4.17 |
| SRGAP3-AS3         | 4.43 | 5.11 | 3.96 |
| ZNF211             | 4.43 | 4.82 | 3.78 |
| ZSCAN5C            | 4.43 | 5.41 | 3.70 |
| ABHD3              | 4.43 | 4.85 | 4.09 |
| PIK3R2             | 4.43 | 4.70 | 4.06 |
| OTTHUMG00000168342 | 4.43 | 4.89 | 4.13 |
| SUSD1              | 4.43 | 4.71 | 4.05 |
| IGLL1              | 4.43 | 5.28 | 3.72 |
| ZNF296             | 4.43 | 4.79 | 4.10 |
| ZFP37              | 4.43 | 4.70 | 4.02 |

|                    |      |      |      |
|--------------------|------|------|------|
| IFI44L             | 4.43 | 5.83 | 3.79 |
| OTTHUMG00000037268 | 4.43 | 4.89 | 4.11 |
| ATOH8              | 4.43 | 4.84 | 4.02 |
| ALOX15             | 4.43 | 5.06 | 4.19 |
| FRMPD3-AS1         | 4.43 | 4.92 | 3.89 |
| SLC35E4            | 4.43 | 4.95 | 3.92 |
| ERBB3              | 4.43 | 4.85 | 3.98 |
| ANXA9              | 4.43 | 4.91 | 4.08 |
| OTTHUMG00000020434 | 4.43 | 5.13 | 4.07 |
| CLHC1              | 4.43 | 5.06 | 4.04 |
| ADTRP              | 4.43 | 4.98 | 3.86 |
| OTTHUMG00000164709 | 4.43 | 5.12 | 3.79 |
| UBR7               | 4.43 | 4.96 | 3.93 |
| LHX6               | 4.43 | 4.72 | 4.23 |
| PAR6A              | 4.43 | 4.69 | 4.00 |
| OR6K3              | 4.43 | 5.07 | 3.88 |
| IQGAP3             | 4.43 | 4.87 | 4.05 |
| ALG1               | 4.43 | 4.95 | 4.05 |
| PPP3R2             | 4.43 | 4.79 | 4.00 |
| SLIT1              | 4.43 | 4.75 | 4.17 |
| FER1L6-AS1         | 4.43 | 4.78 | 3.93 |
| LOC283587          | 4.43 | 4.85 | 3.90 |
| HOXD-AS2           | 4.43 | 4.65 | 4.17 |
| PSTPIP1            | 4.43 | 4.80 | 4.08 |
| DEFB117            | 4.43 | 4.88 | 3.56 |
| LOC401437          | 4.43 | 5.04 | 3.83 |
| ZNF354B            | 4.43 | 4.75 | 3.84 |
| RNA5SP214          | 4.43 | 5.22 | 3.91 |
| ANKDD1B            | 4.43 | 4.95 | 4.13 |
| FRMPD3             | 4.43 | 4.68 | 4.04 |
| SLC22A14           | 4.43 | 4.85 | 3.92 |
| OSBP2              | 4.43 | 4.86 | 4.12 |
| IKZF4              | 4.43 | 4.77 | 4.16 |
| FRY-AS1            | 4.43 | 4.78 | 3.94 |
| SMPDL3B            | 4.43 | 4.75 | 4.11 |
| OTTHUMG00000039470 | 4.43 | 4.79 | 4.14 |
| OR5D14             | 4.43 | 5.17 | 3.83 |
| LOC728095          | 4.43 | 4.77 | 4.01 |
| LOC100506527       | 4.43 | 4.75 | 4.22 |
| ZNF836             | 4.43 | 5.50 | 3.90 |
| ZNF705D            | 4.43 | 4.97 | 3.92 |
| MYO5C              | 4.43 | 5.22 | 3.31 |
| GGACT              | 4.43 | 4.61 | 4.24 |
| ZNF75D             | 4.43 | 4.80 | 4.04 |
| SYBU               | 4.43 | 4.73 | 3.89 |
| EPHB2              | 4.43 | 4.71 | 3.92 |
| EXTL1              | 4.43 | 5.21 | 3.73 |
| MYCL1              | 4.43 | 4.76 | 4.16 |
| TAL1               | 4.43 | 4.82 | 3.95 |

|                    |      |      |      |
|--------------------|------|------|------|
| EDARADD            | 4.43 | 4.84 | 4.04 |
| SOX11              | 4.43 | 4.87 | 3.84 |
| STRADB             | 4.43 | 4.85 | 3.85 |
| PLEKHG1            | 4.43 | 5.05 | 3.82 |
| OTTHUMG00000165152 | 4.43 | 4.79 | 4.06 |
| OTTHUMG00000173496 | 4.43 | 4.75 | 4.19 |
| OTTHUMG00000148992 | 4.43 | 4.94 | 3.99 |
| C9orf170           | 4.43 | 4.83 | 3.98 |
| LOC440925          | 4.43 | 4.96 | 4.12 |
| C1orf228           | 4.43 | 5.05 | 3.73 |
| LOC100507459       | 4.43 | 4.72 | 4.13 |
| LRP3               | 4.43 | 4.70 | 4.07 |
| PDILT              | 4.42 | 5.00 | 4.15 |
| CLPSL2             | 4.42 | 5.08 | 4.11 |
| C2orf50            | 4.42 | 4.78 | 4.11 |
| TGM1               | 4.42 | 4.72 | 4.07 |
| LOC692247          | 4.42 | 4.82 | 4.10 |
| LOC100128682       | 4.42 | 5.07 | 4.01 |
| CTCFL              | 4.42 | 5.07 | 3.88 |
| STAP2              | 4.42 | 5.02 | 4.04 |
| NDUFAF5            | 4.42 | 4.91 | 3.94 |
| OTTHUMG00000020483 | 4.42 | 4.73 | 4.08 |
| LINC00473          | 4.42 | 4.90 | 3.99 |
| CPNE5              | 4.42 | 4.74 | 3.92 |
| LOC399900          | 4.42 | 4.74 | 4.08 |
| DHX34              | 4.42 | 4.83 | 3.99 |
| ZNF324             | 4.42 | 4.97 | 4.01 |
| OTTHUMG00000018618 | 4.42 | 5.22 | 3.48 |
| SLC26A10           | 4.42 | 4.70 | 3.86 |
| LINC00229          | 4.42 | 4.79 | 4.09 |
| SEL1L3             | 4.42 | 5.13 | 3.99 |
| PANK4              | 4.42 | 4.71 | 4.08 |
| HAUS7              | 4.42 | 4.92 | 4.06 |
| SOGA3              | 4.42 | 5.00 | 3.58 |
| CCRL2              | 4.42 | 4.85 | 4.11 |
| LOC286186          | 4.42 | 5.08 | 4.03 |
| RASL11A            | 4.42 | 4.83 | 3.82 |
| APOPT1             | 4.42 | 4.91 | 3.82 |
| CPVL               | 4.42 | 5.23 | 3.80 |
| MTA3               | 4.42 | 4.58 | 4.21 |
| SLC30A2            | 4.42 | 4.89 | 4.08 |
| SLC2A7             | 4.42 | 4.68 | 4.13 |
| ADH1B              | 4.42 | 5.06 | 3.84 |
| C16orf82           | 4.42 | 4.86 | 3.98 |
| LOC100129195       | 4.42 | 4.87 | 4.13 |
| EXOC3L2            | 4.42 | 4.77 | 4.06 |
| KIAA1024           | 4.42 | 4.75 | 3.95 |
| LOC100996524       | 4.42 | 4.70 | 4.09 |
| OTTHUMG00000021535 | 4.42 | 4.88 | 4.10 |

|                    |      |      |      |
|--------------------|------|------|------|
| ZNF418             | 4.42 | 4.80 | 4.07 |
| LINC00703          | 4.42 | 4.83 | 4.14 |
| DACT1              | 4.42 | 5.07 | 3.85 |
| ZC4H2              | 4.42 | 4.86 | 3.71 |
| C16orf59           | 4.42 | 4.77 | 3.97 |
| PKD1L2             | 4.42 | 4.81 | 3.91 |
| DSTNP2             | 4.42 | 5.03 | 3.70 |
| RNA5SP242          | 4.42 | 4.90 | 4.02 |
| SLC22A1            | 4.42 | 4.95 | 4.00 |
| MIR4310            | 4.42 | 5.35 | 3.62 |
| ICA1               | 4.42 | 5.27 | 3.85 |
| TMEM150B           | 4.42 | 4.95 | 3.96 |
| OTTHUMG00000045406 | 4.42 | 4.70 | 4.23 |
| PLA2G4C            | 4.42 | 5.03 | 3.83 |
| ABCB8              | 4.42 | 4.71 | 4.22 |
| CLCN5              | 4.42 | 4.76 | 3.89 |
| ARHGAP15           | 4.42 | 4.77 | 3.68 |
| MIR31              | 4.42 | 5.02 | 3.91 |
| DNA2               | 4.42 | 4.76 | 4.04 |
| KRT9               | 4.42 | 5.07 | 3.98 |
| C2orf71            | 4.42 | 4.80 | 3.81 |
| LOC284080          | 4.42 | 5.17 | 3.97 |
| E2F8               | 4.42 | 4.79 | 4.09 |
| GDNF               | 4.42 | 4.88 | 4.05 |
| SOX21-AS1          | 4.42 | 4.96 | 4.02 |
| TRIM49B            | 4.42 | 5.04 | 4.06 |
| RNA5SP145          | 4.42 | 4.79 | 3.88 |
| AKAP12             | 4.42 | 4.95 | 3.64 |
| PIK3R6             | 4.42 | 4.70 | 4.12 |
| CATSPER4           | 4.42 | 4.96 | 4.05 |
| ESRP2              | 4.42 | 4.83 | 3.99 |
| SPSB4              | 4.42 | 4.81 | 4.17 |
| OTTHUMG00000172651 | 4.42 | 5.14 | 3.83 |
| PNLIPRP2           | 4.42 | 4.91 | 3.98 |
| KANK1              | 4.42 | 4.74 | 3.99 |
| IDI1               | 4.42 | 4.79 | 4.17 |
| C8orf74            | 4.42 | 5.08 | 3.92 |
| OTTHUMG00000172101 | 4.42 | 4.76 | 4.13 |
| FLG-AS1            | 4.42 | 4.81 | 4.06 |
| SOX1               | 4.42 | 4.73 | 3.93 |
| LHPP               | 4.42 | 4.95 | 3.96 |
| TM4SF5             | 4.42 | 4.90 | 4.07 |
| LINC00028          | 4.42 | 4.98 | 3.88 |
| RAB17              | 4.42 | 4.81 | 3.99 |
| KIAA1875           | 4.42 | 4.81 | 3.90 |
| PPTC7              | 4.42 | 4.86 | 3.81 |
| FAHD2A             | 4.42 | 4.87 | 4.16 |
| BLNK               | 4.42 | 5.07 | 3.86 |
| ADRA2C             | 4.41 | 4.79 | 4.03 |

|                    |      |      |      |
|--------------------|------|------|------|
| OTTHUMG00000152386 | 4.41 | 5.42 | 3.58 |
| RFX4               | 4.41 | 4.88 | 3.97 |
| OTTHUMG00000032472 | 4.41 | 5.40 | 3.89 |
| OTTHUMG00000019252 | 4.41 | 4.87 | 4.03 |
| OTTHUMG00000151735 | 4.41 | 4.83 | 4.03 |
| DNAH10OS           | 4.41 | 4.66 | 4.09 |
| TMEM160            | 4.41 | 4.70 | 3.92 |
| EPPK1              | 4.41 | 4.82 | 3.97 |
| OTTHUMG00000163137 | 4.41 | 4.76 | 4.21 |
| MIDN               | 4.41 | 4.64 | 3.98 |
| A2ML1              | 4.41 | 4.90 | 3.88 |
| FAM78A             | 4.41 | 4.68 | 4.15 |
| MSR1               | 4.41 | 5.28 | 3.56 |
| BEST1              | 4.41 | 4.61 | 4.16 |
| MEI1               | 4.41 | 4.81 | 4.21 |
| UBL7-AS1           | 4.41 | 4.88 | 3.58 |
| MT1JP              | 4.41 | 5.10 | 3.82 |
| CYTH3              | 4.41 | 4.78 | 3.73 |
| HMGB4              | 4.41 | 5.05 | 3.90 |
| RGMB-AS1           | 4.41 | 4.92 | 4.14 |
| POLR2E             | 4.41 | 4.77 | 3.77 |
| TRIB1              | 4.41 | 4.67 | 4.07 |
| UGT8               | 4.41 | 4.81 | 4.13 |
| MTRNR2L10          | 4.41 | 5.05 | 3.76 |
| FAM156A            | 4.41 | 4.99 | 3.80 |
| RTDR1              | 4.41 | 4.66 | 4.16 |
| KLHL34             | 4.41 | 4.83 | 3.61 |
| BCORL1             | 4.41 | 4.81 | 3.93 |
| LYAR               | 4.41 | 4.95 | 3.65 |
| WASF1              | 4.41 | 4.64 | 4.07 |
| CYP4F24P           | 4.41 | 5.50 | 3.46 |
| PLEKHG6            | 4.41 | 4.64 | 4.16 |
| BRCA1              | 4.41 | 4.79 | 3.93 |
| MIR3926-1          | 4.41 | 4.91 | 3.82 |
| HOXB1              | 4.41 | 4.89 | 4.14 |
| CASC5              | 4.41 | 5.16 | 3.80 |
| NYX                | 4.41 | 4.86 | 4.00 |
| RASD2              | 4.41 | 4.71 | 4.00 |
| UNC93A             | 4.41 | 4.84 | 4.08 |
| IKZF1              | 4.41 | 4.77 | 4.19 |
| CDK11A             | 4.41 | 4.82 | 3.97 |
| TRAPPC13           | 4.41 | 4.77 | 3.86 |
| SERPINA13P         | 4.41 | 5.09 | 3.88 |
| DNMT3B             | 4.41 | 4.69 | 3.86 |
| SCT                | 4.41 | 4.76 | 3.99 |
| SEMA3B             | 4.41 | 4.73 | 4.14 |
| KBTBD3             | 4.41 | 4.54 | 4.07 |
| CLVS2              | 4.41 | 5.27 | 3.86 |
| HYKK               | 4.41 | 4.78 | 4.01 |

|                    |      |      |      |
|--------------------|------|------|------|
| GIMAP8             | 4.41 | 4.73 | 3.82 |
| SHROOM3            | 4.41 | 4.66 | 3.95 |
| ZP3                | 4.41 | 4.99 | 3.96 |
| KCNJ2              | 4.41 | 4.96 | 3.80 |
| PI16               | 4.41 | 4.94 | 4.07 |
| C1orf233           | 4.41 | 4.74 | 3.80 |
| SNORA9             | 4.41 | 4.99 | 3.34 |
| LOC284412          | 4.41 | 5.03 | 3.79 |
| MIR4311            | 4.41 | 5.18 | 3.39 |
| NAT9               | 4.41 | 4.74 | 3.96 |
| FAM154A            | 4.41 | 4.80 | 4.07 |
| IGF2BP2            | 4.41 | 4.72 | 4.01 |
| LARS2              | 4.41 | 4.97 | 4.00 |
| CCDC110            | 4.41 | 5.00 | 3.71 |
| FLJ32790           | 4.41 | 4.97 | 4.01 |
| MIR4771-1          | 4.41 | 4.89 | 3.45 |
| C5orf30            | 4.41 | 4.92 | 3.92 |
| NHSL1              | 4.41 | 4.75 | 3.78 |
| ENTPD1             | 4.41 | 5.44 | 3.86 |
| TMEM191C           | 4.41 | 4.82 | 3.47 |
| AWAT2              | 4.41 | 4.82 | 3.99 |
| ADAMTS8            | 4.41 | 4.85 | 4.00 |
| CORO2B             | 4.41 | 4.94 | 3.92 |
| OTTHUMG00000015860 | 4.41 | 4.69 | 3.97 |
| C10orf85           | 4.41 | 4.81 | 4.15 |
| LOC285768          | 4.41 | 5.05 | 3.83 |
| RSPH1              | 4.41 | 4.79 | 3.86 |
| SHANK1             | 4.41 | 4.88 | 3.90 |
| ABCA10             | 4.40 | 5.01 | 3.75 |
| ZNF22              | 4.40 | 5.09 | 3.94 |
| FLJ20712           | 4.40 | 4.82 | 3.94 |
| RASSF1             | 4.40 | 4.92 | 4.15 |
| OTTHUMG00000022687 | 4.40 | 4.73 | 3.87 |
| OTTHUMG00000017546 | 4.40 | 5.05 | 3.97 |
| OTTHUMG00000171820 | 4.40 | 4.75 | 4.17 |
| OTTHUMG00000170067 | 4.40 | 5.32 | 3.59 |
| CSNK1A1P1          | 4.40 | 4.94 | 3.95 |
| OTTHUMG00000151365 | 4.40 | 4.88 | 3.85 |
| LOC100240728       | 4.40 | 4.98 | 3.97 |
| OOEP-AS1           | 4.40 | 4.87 | 3.73 |
| OR6C3              | 4.40 | 5.33 | 3.94 |
| AP1B1P1            | 4.40 | 4.94 | 4.16 |
| TMEM192            | 4.40 | 4.75 | 3.97 |
| APLF               | 4.40 | 4.52 | 4.17 |
| LOC100128946       | 4.40 | 4.85 | 3.88 |
| SLC34A3            | 4.40 | 5.14 | 3.36 |
| GATA2              | 4.40 | 4.80 | 3.96 |
| FGF5               | 4.40 | 4.63 | 3.86 |
| CYS1               | 4.40 | 4.79 | 3.54 |

|                    |      |      |      |
|--------------------|------|------|------|
| CNTD2              | 4.40 | 4.75 | 3.84 |
| HES6               | 4.40 | 4.61 | 4.09 |
| MIIP               | 4.40 | 4.82 | 4.01 |
| MGC15705           | 4.40 | 4.84 | 3.72 |
| SERTAD1            | 4.40 | 4.73 | 4.13 |
| LOC374890          | 4.40 | 5.28 | 3.62 |
| TMEM213            | 4.40 | 5.03 | 4.01 |
| FERMT1             | 4.40 | 4.70 | 4.10 |
| DUT                | 4.40 | 4.73 | 3.99 |
| FLJ26245           | 4.40 | 4.75 | 3.96 |
| LOC285556          | 4.40 | 4.86 | 4.18 |
| LOC100129473       | 4.40 | 4.82 | 3.84 |
| TLR1               | 4.40 | 5.12 | 3.93 |
| WFDC12             | 4.40 | 4.78 | 3.95 |
| CRYGA              | 4.40 | 4.87 | 3.79 |
| HTR3E              | 4.40 | 5.17 | 3.72 |
| S100A12            | 4.40 | 5.32 | 3.82 |
| CYP4B1             | 4.40 | 5.16 | 3.98 |
| USHBP1             | 4.40 | 4.75 | 3.99 |
| EDN1               | 4.40 | 5.08 | 3.57 |
| SPRNP1             | 4.40 | 5.48 | 3.07 |
| MED12L             | 4.40 | 4.68 | 4.07 |
| TECPR1             | 4.40 | 4.76 | 4.25 |
| AHSG               | 4.40 | 4.71 | 3.94 |
| LIME1              | 4.40 | 5.05 | 3.88 |
| TYRO3              | 4.40 | 4.66 | 4.16 |
| LOC284837          | 4.40 | 4.86 | 3.76 |
| NEURL2             | 4.40 | 4.76 | 3.75 |
| MEGF11             | 4.40 | 4.78 | 4.15 |
| CNGB3              | 4.40 | 4.60 | 4.16 |
| LOC100506022       | 4.40 | 4.70 | 4.12 |
| CDHR2              | 4.40 | 4.64 | 3.92 |
| SNX10              | 4.40 | 5.56 | 3.90 |
| C2orf70            | 4.40 | 4.66 | 4.06 |
| PTGER4             | 4.40 | 4.98 | 3.85 |
| SRMS               | 4.40 | 4.58 | 4.01 |
| CD40               | 4.40 | 5.29 | 4.09 |
| MIR133B            | 4.40 | 4.99 | 3.99 |
| TCEB3CL2           | 4.40 | 4.92 | 3.98 |
| C20orf203          | 4.40 | 4.62 | 4.01 |
| ZBTB32             | 4.40 | 4.79 | 3.80 |
| UGT2B10            | 4.40 | 4.72 | 4.05 |
| RAB41              | 4.40 | 4.74 | 3.79 |
| LOC100506054       | 4.40 | 5.00 | 4.02 |
| PELI2              | 4.40 | 5.30 | 3.49 |
| SLC12A3            | 4.40 | 4.64 | 4.02 |
| OTTHUMG00000034822 | 4.40 | 4.92 | 3.95 |
| LOC388948          | 4.40 | 4.71 | 3.76 |
| C3orf20            | 4.40 | 5.02 | 4.08 |



|                    |      |      |      |
|--------------------|------|------|------|
| RNF219-AS1         | 4.40 | 4.66 | 4.21 |
| RNASE8             | 4.40 | 5.16 | 3.82 |
| MIR659             | 4.40 | 5.11 | 3.51 |
| MIR765             | 4.40 | 4.95 | 3.84 |
| GPM6A              | 4.40 | 4.87 | 3.88 |
| IMPG2              | 4.40 | 4.68 | 4.23 |
| C9orf96            | 4.40 | 4.77 | 4.17 |
| LCK                | 4.40 | 4.75 | 3.96 |
| OR4D11             | 4.40 | 5.23 | 4.00 |
| C7orf66            | 4.40 | 5.34 | 3.68 |
| CITED1             | 4.40 | 4.65 | 4.06 |
| IGFL2              | 4.40 | 4.75 | 3.71 |
| USF1               | 4.40 | 4.77 | 3.84 |
| USP30-AS1          | 4.40 | 4.71 | 4.05 |
| ZSCAN23            | 4.40 | 4.93 | 3.88 |
| OTTHUMG00000179318 | 4.40 | 5.09 | 3.57 |
| C20orf196          | 4.40 | 4.73 | 4.17 |
| CDHR4              | 4.40 | 4.85 | 3.62 |
| THEM5              | 4.40 | 5.06 | 4.06 |
| LOC643201          | 4.39 | 4.92 | 4.04 |
| GABRE              | 4.39 | 4.96 | 3.39 |
| KNDC1              | 4.39 | 4.72 | 4.04 |
| NELL1              | 4.39 | 4.88 | 4.11 |
| QSOX2              | 4.39 | 4.80 | 3.93 |
| MYBPC3             | 4.39 | 4.68 | 3.84 |
| ATP13A2            | 4.39 | 4.92 | 3.74 |
| IL6                | 4.39 | 4.77 | 4.00 |
| OTTHUMG00000153448 | 4.39 | 4.91 | 3.98 |
| OR12D2             | 4.39 | 5.10 | 3.80 |
| DOCK3              | 4.39 | 4.75 | 3.98 |
| ARHGEF10L          | 4.39 | 4.71 | 4.14 |
| KCNJ8              | 4.39 | 4.93 | 3.67 |
| S1PR5              | 4.39 | 4.64 | 3.82 |
| ZFP69B             | 4.39 | 4.93 | 3.85 |
| OTTHUMG00000180012 | 4.39 | 4.92 | 3.93 |
| ADPRM              | 4.39 | 4.80 | 4.03 |
| IGLV9-49           | 4.39 | 5.17 | 3.88 |
| LOC730020          | 4.39 | 5.06 | 3.82 |
| OTTHUMG00000164978 | 4.39 | 5.02 | 4.03 |
| OTTHUMG00000150319 | 4.39 | 5.03 | 3.79 |
| OTTHUMG00000152579 | 4.39 | 4.81 | 4.15 |
| LINC00426          | 4.39 | 4.78 | 4.18 |
| PIGX               | 4.39 | 4.69 | 4.04 |
| RASL12             | 4.39 | 5.20 | 4.01 |
| OTTHUMG00000172237 | 4.39 | 4.67 | 4.10 |
| DUSP8              | 4.39 | 4.88 | 4.24 |
| ZNF263             | 4.39 | 4.86 | 3.93 |
| NEIL3              | 4.39 | 4.91 | 3.81 |
| MPPED1             | 4.39 | 4.99 | 3.65 |

|                    |      |      |      |
|--------------------|------|------|------|
| OTOG               | 4.39 | 4.63 | 4.24 |
| ITPKA              | 4.39 | 4.81 | 4.01 |
| LINC00487          | 4.39 | 4.80 | 3.93 |
| NCAM1              | 4.39 | 4.83 | 3.92 |
| ZNF454             | 4.39 | 5.03 | 4.00 |
| KRT31              | 4.39 | 4.85 | 3.93 |
| RGS12              | 4.39 | 4.68 | 4.02 |
| LOC100507388       | 4.39 | 4.67 | 3.86 |
| INCENP             | 4.39 | 4.46 | 4.21 |
| LRRC70             | 4.39 | 4.78 | 4.08 |
| UBXN8              | 4.39 | 4.78 | 4.11 |
| PMCHL1             | 4.39 | 5.59 | 3.12 |
| MIR2681            | 4.39 | 4.92 | 3.96 |
| MIR3674            | 4.39 | 4.66 | 4.09 |
| DNAJC18            | 4.39 | 4.78 | 3.96 |
| SOX30              | 4.39 | 5.21 | 3.97 |
| REEP2              | 4.39 | 4.72 | 4.04 |
| MIR4299            | 4.39 | 5.19 | 3.88 |
| LRRC10B            | 4.39 | 4.77 | 3.88 |
| ITGAE              | 4.39 | 4.67 | 4.17 |
| NLRC3              | 4.39 | 4.67 | 4.07 |
| TTC39A             | 4.39 | 4.68 | 4.09 |
| SLMO1              | 4.39 | 5.08 | 3.92 |
| OTTHUMG00000182000 | 4.39 | 4.93 | 4.03 |
| LOC440742          | 4.39 | 4.80 | 4.05 |
| PRKAR2B            | 4.39 | 5.33 | 3.46 |
| C2orf69            | 4.39 | 4.91 | 3.80 |
| OTTHUMG00000177951 | 4.39 | 4.71 | 3.88 |
| ZBED3-AS1          | 4.39 | 4.93 | 3.97 |
| TRIB3              | 4.39 | 4.86 | 4.09 |
| LOC100506325       | 4.39 | 4.81 | 3.98 |
| HIST1H2AI          | 4.39 | 5.19 | 3.56 |
| TOP1P2             | 4.39 | 4.89 | 3.91 |
| SORCS2             | 4.39 | 4.68 | 3.98 |
| LOC147093          | 4.39 | 4.98 | 4.04 |
| PROX2              | 4.39 | 4.94 | 3.96 |
| RGAG4              | 4.39 | 4.88 | 3.92 |
| ADIPOQ             | 4.39 | 6.48 | 3.33 |
| MYLK2              | 4.39 | 4.78 | 4.10 |
| LOC100289230       | 4.39 | 4.78 | 3.88 |
| SP140L             | 4.38 | 5.09 | 3.89 |
| ITIH4-AS1          | 4.38 | 4.97 | 3.76 |
| GPANK1             | 4.38 | 4.62 | 4.20 |
| ANKRD61            | 4.38 | 4.85 | 4.15 |
| OR2H2              | 4.38 | 5.00 | 3.83 |
| LOC387720          | 4.38 | 4.67 | 4.15 |
| OTTHUMG00000152794 | 4.38 | 4.61 | 3.82 |
| NAPSB              | 4.38 | 4.73 | 4.15 |
| LOC100130417       | 4.38 | 4.85 | 3.90 |

|                    |      |      |      |
|--------------------|------|------|------|
| CIB2               | 4.38 | 4.76 | 3.95 |
| OTTHUMG00000176355 | 4.38 | 5.48 | 3.91 |
| BUB1               | 4.38 | 5.03 | 3.90 |
| LOC643355          | 4.38 | 4.82 | 3.90 |
| LOC100133106       | 4.38 | 4.85 | 4.06 |
| LOC285500          | 4.38 | 4.97 | 3.70 |
| LOC100128276       | 4.38 | 4.59 | 4.23 |
| LOC643387          | 4.38 | 4.68 | 4.11 |
| MAFG               | 4.38 | 4.81 | 3.85 |
| DEFB106A           | 4.38 | 4.94 | 4.08 |
| MMS22L             | 4.38 | 4.85 | 3.96 |
| LOC100289361       | 4.38 | 4.80 | 3.53 |
| MOB3B              | 4.38 | 5.02 | 3.04 |
| MICU3              | 4.38 | 4.97 | 4.04 |
| RAB25              | 4.38 | 5.19 | 3.49 |
| ZSWIM5             | 4.38 | 5.18 | 3.97 |
| CCDC151            | 4.38 | 4.71 | 3.93 |
| TCEANC             | 4.38 | 4.76 | 3.63 |
| FASLG              | 4.38 | 5.01 | 3.99 |
| KLKP1              | 4.38 | 4.81 | 3.86 |
| OTTHUMG00000016716 | 4.38 | 4.91 | 3.81 |
| CXCR6              | 4.38 | 4.85 | 4.08 |
| KCNAB2             | 4.38 | 4.75 | 4.02 |
| LOC283914          | 4.38 | 4.78 | 4.00 |
| SYT9               | 4.38 | 4.85 | 3.90 |
| LOC100289283       | 4.38 | 5.12 | 3.85 |
| DMBT1              | 4.38 | 4.90 | 3.85 |
| OR7C1              | 4.38 | 5.54 | 3.79 |
| LOC440173          | 4.38 | 5.20 | 3.78 |
| ZNF530             | 4.38 | 4.67 | 3.32 |
| EYA1               | 4.38 | 4.77 | 3.69 |
| OTTHUMG00000171046 | 4.38 | 4.66 | 4.06 |
| FER1L5             | 4.38 | 4.63 | 4.17 |
| SNX29P1            | 4.38 | 4.98 | 3.97 |
| KRT39              | 4.38 | 4.82 | 4.03 |
| TMEM81             | 4.38 | 4.74 | 3.81 |
| ECEL1P2            | 4.38 | 5.04 | 3.92 |
| KRT8P41            | 4.38 | 5.13 | 3.68 |
| SIRPB2             | 4.38 | 4.82 | 3.87 |
| LOC100507191       | 4.38 | 5.18 | 4.09 |
| ALCAM              | 4.38 | 4.79 | 4.03 |
| SYCE2              | 4.38 | 4.59 | 4.11 |
| HCG23              | 4.38 | 4.78 | 4.15 |
| LOC100506907       | 4.38 | 4.82 | 3.99 |
| LOC100129973       | 4.38 | 4.76 | 3.87 |
| LINC00917          | 4.38 | 4.59 | 4.06 |
| AP5B1              | 4.38 | 4.55 | 4.10 |
| SNORA66            | 4.38 | 4.95 | 2.80 |
| KLHL31             | 4.38 | 4.96 | 3.80 |

|                    |      |      |      |
|--------------------|------|------|------|
| MIR4283-1          | 4.38 | 4.96 | 3.90 |
| CCDC137            | 4.38 | 4.80 | 4.07 |
| PRSS33             | 4.38 | 4.95 | 3.87 |
| ADARB2             | 4.38 | 4.57 | 3.98 |
| PPM1H              | 4.38 | 4.89 | 3.77 |
| PAX1               | 4.38 | 4.62 | 4.12 |
| OTTHUMG00000153205 | 4.38 | 4.88 | 3.97 |
| SLC12A8            | 4.38 | 4.83 | 3.30 |
| OTTHUMG00000163336 | 4.38 | 4.76 | 4.15 |
| SOCS2              | 4.38 | 4.80 | 3.96 |
| FANCF              | 4.38 | 4.77 | 3.88 |
| LINC00200          | 4.38 | 4.65 | 4.16 |
| ADAM23             | 4.38 | 4.94 | 3.86 |
| RNU7-50P           | 4.38 | 5.34 | 3.24 |
| SERPINB9           | 4.38 | 5.08 | 3.87 |
| SSTR5-AS1          | 4.38 | 4.95 | 3.79 |
| RNA5SP206          | 4.38 | 5.60 | 3.65 |
| C10orf91           | 4.38 | 4.81 | 4.14 |
| ADAM22             | 4.38 | 4.76 | 3.79 |
| OTTHUMG00000153742 | 4.38 | 4.97 | 4.01 |
| RNU1-22P           | 4.38 | 4.99 | 3.67 |
| FLJ45825           | 4.38 | 4.85 | 3.98 |
| TMC8               | 4.38 | 4.76 | 3.96 |
| FLJ11292           | 4.38 | 4.63 | 3.94 |
| RPL19P12           | 4.38 | 4.91 | 3.84 |
| ATOH1              | 4.38 | 4.85 | 3.75 |
| RNA5SP437          | 4.37 | 4.93 | 3.93 |
| CLLU1              | 4.37 | 4.65 | 4.16 |
| GJB5               | 4.37 | 5.12 | 3.99 |
| ALDH16A1           | 4.37 | 4.77 | 4.15 |
| RASL11B            | 4.37 | 4.75 | 4.24 |
| EVX2               | 4.37 | 4.79 | 4.02 |
| LOC285484          | 4.37 | 4.83 | 4.02 |
| OTTHUMG00000161631 | 4.37 | 4.82 | 3.85 |
| SLC22A20           | 4.37 | 4.62 | 4.03 |
| BIRC3              | 4.37 | 4.90 | 3.83 |
| OCSTAMP            | 4.37 | 4.78 | 4.02 |
| LOC728342          | 4.37 | 4.56 | 4.22 |
| FANCM              | 4.37 | 4.74 | 4.03 |
| OTTHUMG00000182192 | 4.37 | 5.26 | 3.58 |
| OTTHUMG00000132217 | 4.37 | 5.14 | 3.46 |
| CCDC157            | 4.37 | 4.74 | 4.01 |
| CRP                | 4.37 | 5.03 | 3.94 |
| DTX1               | 4.37 | 4.66 | 3.74 |
| MBL1P              | 4.37 | 4.80 | 3.98 |
| DUS4L              | 4.37 | 4.72 | 4.17 |
| CDC34              | 4.37 | 4.81 | 3.97 |
| ATRIP              | 4.37 | 4.90 | 3.72 |
| RASGRP1            | 4.37 | 4.61 | 4.02 |

|                    |      |      |      |
|--------------------|------|------|------|
| GP2                | 4.37 | 4.74 | 4.08 |
| MIR4635            | 4.37 | 4.81 | 3.57 |
| PABPC5             | 4.37 | 4.77 | 4.03 |
| ARL16              | 4.37 | 4.75 | 3.84 |
| SLC24A3            | 4.37 | 4.80 | 3.66 |
| HDHD1              | 4.37 | 4.71 | 3.92 |
| NTF3               | 4.37 | 4.78 | 3.55 |
| PC                 | 4.37 | 4.75 | 3.97 |
| DKFZP434K028       | 4.37 | 4.82 | 3.86 |
| HPDL               | 4.37 | 4.76 | 4.19 |
| WBSCR28            | 4.37 | 4.76 | 4.01 |
| TNFSF15            | 4.37 | 4.69 | 3.60 |
| KHK                | 4.37 | 4.91 | 3.93 |
| COL18A1-AS1        | 4.37 | 4.83 | 4.08 |
| PLCH1-AS1          | 4.37 | 4.76 | 3.84 |
| OTTHUMG00000156393 | 4.37 | 4.80 | 3.53 |
| OTTHUMG00000178589 | 4.37 | 4.87 | 4.04 |
| OTTHUMG00000171068 | 4.37 | 4.88 | 3.76 |
| TULP2              | 4.37 | 4.96 | 3.84 |
| CCDC15             | 4.37 | 4.55 | 3.93 |
| ADPRH              | 4.37 | 4.83 | 3.83 |
| MYH3               | 4.37 | 4.88 | 3.87 |
| OTOF               | 4.37 | 4.84 | 3.98 |
| CACNB4             | 4.37 | 4.83 | 3.99 |
| HELT               | 4.37 | 4.67 | 4.10 |
| LOC400768          | 4.37 | 4.63 | 4.20 |
| RNA5SP499          | 4.37 | 5.16 | 3.13 |
| LOC101060142       | 4.37 | 4.91 | 3.94 |
| PISRT1             | 4.37 | 4.77 | 4.04 |
| KAT7               | 4.37 | 4.77 | 3.69 |
| FCRL1              | 4.37 | 4.65 | 4.04 |
| OTTHUMG00000155528 | 4.37 | 4.67 | 3.61 |
| AHSP               | 4.37 | 4.90 | 3.93 |
| CBX4               | 4.37 | 4.68 | 4.01 |
| APOA4              | 4.37 | 4.78 | 3.76 |
| OR1J1              | 4.37 | 4.90 | 3.81 |
| FAM172BP           | 4.36 | 5.05 | 3.61 |
| LOC100289187       | 4.36 | 4.91 | 3.64 |
| LOC1720            | 4.36 | 5.06 | 3.55 |
| LINC00951          | 4.36 | 4.75 | 3.98 |
| MORC1-AS1          | 4.36 | 4.74 | 4.19 |
| E2F2               | 4.36 | 4.74 | 3.89 |
| LOC100505702       | 4.36 | 4.72 | 3.91 |
| RAB39B             | 4.36 | 4.93 | 3.84 |
| ANO2               | 4.36 | 5.15 | 4.08 |
| OTTHUMG00000150683 | 4.36 | 5.36 | 3.61 |
| PCYT2              | 4.36 | 4.71 | 4.14 |
| XK                 | 4.36 | 4.75 | 3.79 |
| LMOD2              | 4.36 | 4.74 | 3.98 |

|                    |      |      |      |
|--------------------|------|------|------|
| AARS2              | 4.36 | 4.59 | 4.18 |
| WDFY4              | 4.36 | 4.81 | 4.06 |
| OTTHUMG00000165872 | 4.36 | 4.84 | 3.90 |
| B3GNT8             | 4.36 | 4.88 | 3.55 |
| HEATR4             | 4.36 | 4.71 | 4.15 |
| UPP1               | 4.36 | 4.89 | 3.69 |
| SLC44A3            | 4.36 | 4.58 | 3.99 |
| CALHM1             | 4.36 | 4.97 | 3.72 |
| LOC100129203       | 4.36 | 4.73 | 3.80 |
| LOC100270679       | 4.36 | 4.71 | 4.05 |
| PKD2L1             | 4.36 | 4.64 | 4.17 |
| GNGT2              | 4.36 | 4.92 | 3.77 |
| OTTHUMG00000133715 | 4.36 | 4.83 | 3.76 |
| FTCD               | 4.36 | 4.54 | 4.14 |
| PAQR5              | 4.36 | 4.85 | 4.03 |
| FBXO36-IT1         | 4.36 | 4.87 | 3.79 |
| OTTHUMG00000035458 | 4.36 | 5.05 | 3.65 |
| TXNDC2             | 4.36 | 4.78 | 3.96 |
| PSG5               | 4.36 | 4.84 | 4.15 |
| VAV1               | 4.36 | 4.74 | 3.95 |
| CPO                | 4.36 | 4.97 | 3.71 |
| LOC100129617       | 4.36 | 4.62 | 4.01 |
| MATN1              | 4.36 | 4.77 | 3.95 |
| OTTHUMG00000164537 | 4.36 | 4.89 | 4.01 |
| CATSPER2P1         | 4.36 | 5.26 | 2.86 |
| C7orf13            | 4.36 | 4.84 | 4.06 |
| MIR1183            | 4.36 | 5.05 | 3.58 |
| OTTHUMG00000161051 | 4.36 | 5.10 | 3.96 |
| BEND3P3            | 4.36 | 4.87 | 3.67 |
| CD300LD            | 4.36 | 5.23 | 3.72 |
| FAM27L             | 4.36 | 4.81 | 3.70 |
| ING1               | 4.36 | 4.81 | 3.96 |
| SLC10A7            | 4.36 | 4.63 | 4.00 |
| CCBP2              | 4.36 | 4.73 | 4.03 |
| OTTHUMG00000090443 | 4.36 | 4.81 | 4.00 |
| OTTHUMG00000014193 | 4.36 | 4.71 | 3.73 |
| PCDH10             | 4.36 | 4.94 | 3.94 |
| G6PC               | 4.36 | 4.54 | 4.10 |
| MIR4655            | 4.36 | 5.11 | 3.41 |
| OTTHUMG00000017896 | 4.36 | 5.00 | 3.98 |
| GJB4               | 4.36 | 4.87 | 3.66 |
| DNAH17-AS1         | 4.36 | 4.56 | 4.20 |
| GPRIN3             | 4.36 | 4.81 | 3.98 |
| RPL7               | 4.36 | 4.73 | 4.11 |
| EXPH5              | 4.36 | 4.85 | 4.03 |
| NEXN-AS1           | 4.36 | 4.73 | 4.07 |
| PLD5               | 4.36 | 4.66 | 4.12 |
| PPFIA2             | 4.36 | 4.79 | 3.74 |
| COL21A1            | 4.36 | 5.30 | 3.64 |

|                    |      |      |      |
|--------------------|------|------|------|
| C1QA               | 4.36 | 4.90 | 3.65 |
| SCN8A              | 4.36 | 5.10 | 3.56 |
| ST18               | 4.36 | 4.93 | 4.13 |
| CCDC36             | 4.36 | 4.86 | 3.80 |
| C16orf46           | 4.36 | 4.83 | 4.07 |
| OTTHUMG00000163233 | 4.36 | 4.84 | 3.89 |
| CST9L              | 4.36 | 4.87 | 3.99 |
| DEFB123            | 4.36 | 4.70 | 3.57 |
| ZNF658             | 4.36 | 4.65 | 3.97 |
| LOC643406          | 4.35 | 4.77 | 3.92 |
| NUTF2              | 4.35 | 4.76 | 3.88 |
| CSRNP3             | 4.35 | 4.73 | 4.06 |
| HIST1H1A           | 4.35 | 5.19 | 3.57 |
| MAR10              | 4.35 | 4.91 | 4.12 |
| PRF1               | 4.35 | 4.72 | 3.83 |
| TMSB4Y             | 4.35 | 5.04 | 3.54 |
| OR8H3              | 4.35 | 5.16 | 3.81 |
| OTTHUMG00000171062 | 4.35 | 5.12 | 3.62 |
| LINC00310          | 4.35 | 4.73 | 4.12 |
| TENM2              | 4.35 | 4.69 | 3.94 |
| PRAMEF1            | 4.35 | 5.58 | 2.90 |
| TMC6               | 4.35 | 4.59 | 4.09 |
| OTTHUMG00000173251 | 4.35 | 4.82 | 3.99 |
| VTRNA1-3           | 4.35 | 4.95 | 3.67 |
| IRF8               | 4.35 | 5.06 | 3.89 |
| TUBA3E             | 4.35 | 4.60 | 4.17 |
| TMOD2              | 4.35 | 4.84 | 4.12 |
| TP53I13            | 4.35 | 4.94 | 3.81 |
| OTTHUMG00000171690 | 4.35 | 5.02 | 4.10 |
| HCG22              | 4.35 | 5.04 | 3.51 |
| OTTHUMG00000170968 | 4.35 | 4.75 | 3.89 |
| PRRG3              | 4.35 | 5.17 | 3.82 |
| CDH20              | 4.35 | 4.59 | 4.01 |
| C5orf20            | 4.35 | 4.65 | 4.02 |
| OR2L5              | 4.35 | 5.89 | 3.51 |
| ADAM6              | 4.35 | 4.74 | 3.99 |
| ABTB1              | 4.35 | 4.54 | 4.20 |
| OTTHUMG00000015218 | 4.35 | 5.10 | 3.94 |
| SCRT2              | 4.35 | 4.84 | 3.60 |
| ESRRG              | 4.35 | 4.82 | 3.80 |
| WNT5A-AS1          | 4.35 | 4.80 | 3.77 |
| SKA3               | 4.35 | 4.75 | 3.94 |
| DNAI1              | 4.35 | 4.79 | 3.83 |
| CGB2               | 4.35 | 4.83 | 3.97 |
| PYGM               | 4.35 | 4.73 | 4.10 |
| REEP4              | 4.35 | 4.66 | 3.76 |
| PDCD10             | 4.35 | 4.84 | 3.81 |
| PGAM1              | 4.35 | 5.13 | 3.53 |
| KCNC4-AS1          | 4.35 | 4.98 | 3.97 |

|                    |      |      |      |
|--------------------|------|------|------|
| OTTHUMG00000020566 | 4.35 | 5.41 | 3.88 |
| TMEM179            | 4.35 | 4.64 | 4.10 |
| ZNF45              | 4.35 | 4.73 | 3.91 |
| SH3GL1P2           | 4.35 | 4.83 | 3.10 |
| ACRC               | 4.35 | 4.71 | 4.02 |
| MIR9-1             | 4.35 | 4.96 | 3.79 |
| NAV2-AS4           | 4.35 | 4.83 | 3.93 |
| CSNK1G2-AS1        | 4.35 | 4.74 | 4.05 |
| ZNF793             | 4.35 | 4.58 | 4.05 |
| MISP               | 4.35 | 4.67 | 3.92 |
| OTTHUMG00000154176 | 4.35 | 4.52 | 4.09 |
| PRR16              | 4.35 | 4.92 | 3.75 |
| FCGR1A             | 4.35 | 5.20 | 3.62 |
| KIF20A             | 4.35 | 5.01 | 3.72 |
| LYSMD4             | 4.35 | 4.77 | 3.96 |
| DDN                | 4.35 | 4.98 | 4.03 |
| MIR3118-4          | 4.35 | 4.95 | 3.53 |
| INPP4B             | 4.35 | 4.89 | 3.88 |
| LILRA3             | 4.35 | 4.77 | 4.05 |
| GMNN               | 4.35 | 5.40 | 3.64 |
| LOC100507308       | 4.35 | 4.79 | 4.10 |
| CXorf65            | 4.35 | 4.76 | 3.95 |
| C5orf49            | 4.35 | 4.99 | 3.96 |
| ZNF79              | 4.35 | 4.67 | 3.82 |
| ZNRF3-AS1          | 4.35 | 5.04 | 3.89 |
| UCN                | 4.35 | 4.55 | 4.10 |
| OTTHUMG00000160385 | 4.35 | 4.69 | 3.85 |
| C8orf48            | 4.35 | 4.91 | 3.74 |
| LOC284926          | 4.35 | 4.85 | 3.82 |
| LOC100128703       | 4.35 | 4.95 | 4.13 |
| ST3GAL5            | 4.35 | 4.68 | 4.03 |
| WBSCR17            | 4.35 | 4.95 | 3.90 |
| ENPP7              | 4.34 | 4.69 | 4.03 |
| OR7E2P             | 4.34 | 5.02 | 3.87 |
| GZMA               | 4.34 | 4.87 | 3.73 |
| KDM8               | 4.34 | 4.73 | 3.98 |
| CYP2E1             | 4.34 | 4.56 | 4.02 |
| OTTHUMG00000037758 | 4.34 | 4.76 | 4.04 |
| ASIC2              | 4.34 | 4.65 | 3.91 |
| OTTHUMG00000035686 | 4.34 | 5.10 | 3.80 |
| DNAH10             | 4.34 | 4.64 | 4.12 |
| LOC100128130       | 4.34 | 4.99 | 3.67 |
| OTTHUMG00000008075 | 4.34 | 4.87 | 3.80 |
| PHF21B             | 4.34 | 4.84 | 4.01 |
| LOC441178          | 4.34 | 4.90 | 3.71 |
| SLC13A2            | 4.34 | 4.58 | 3.78 |
| CH25H              | 4.34 | 4.90 | 3.81 |
| ZC2HC1B            | 4.34 | 4.83 | 3.72 |
| YPEL4              | 4.34 | 4.79 | 3.91 |



|                    |      |      |      |
|--------------------|------|------|------|
| BLK                | 4.34 | 4.71 | 4.01 |
| GJD3               | 4.34 | 4.80 | 4.05 |
| LOC150051          | 4.34 | 4.86 | 3.88 |
| OTTHUMG00000177628 | 4.34 | 4.89 | 3.75 |
| NPHS2              | 4.34 | 4.64 | 4.05 |
| GPN3               | 4.34 | 4.77 | 3.49 |
| PIK3IP1            | 4.34 | 4.66 | 4.21 |
| KIAA1257           | 4.34 | 4.69 | 3.88 |
| HOXA11-AS          | 4.34 | 4.77 | 3.98 |
| LOC100131373       | 4.34 | 4.85 | 4.01 |
| TSPAN7             | 4.34 | 4.99 | 3.43 |
| CYP27B1            | 4.34 | 4.67 | 3.95 |
| RSBN1L-AS1         | 4.34 | 4.62 | 3.98 |
| MAP4K2             | 4.34 | 4.82 | 3.86 |
| OTTHUMG00000078329 | 4.34 | 5.11 | 3.87 |
| KRTAP17-1          | 4.34 | 4.50 | 3.86 |
| DKFZp686F0839      | 4.34 | 4.70 | 4.11 |
| TMEM238            | 4.34 | 4.58 | 3.85 |
| KLF14              | 4.34 | 4.57 | 4.03 |
| SPATA41            | 4.34 | 4.77 | 3.82 |
| CLP1               | 4.34 | 4.75 | 3.97 |
| CMA1               | 4.34 | 5.04 | 3.79 |
| RIBC1              | 4.34 | 4.56 | 3.90 |
| EPS8L3             | 4.34 | 4.78 | 3.74 |
| LSM3               | 4.34 | 4.69 | 3.88 |
| C19orf67           | 4.34 | 4.68 | 3.97 |
| OTTHUMG00000086700 | 4.34 | 5.17 | 4.06 |
| CXCL5              | 4.34 | 5.03 | 3.97 |
| CACNG5             | 4.34 | 4.75 | 3.92 |
| ERI3-IT1           | 4.34 | 4.60 | 3.89 |
| OTTHUMG00000176992 | 4.34 | 5.12 | 3.71 |
| TSPAN15            | 4.34 | 4.74 | 3.99 |
| SRGAP3-AS2         | 4.34 | 4.84 | 3.90 |
| FLJ44881           | 4.34 | 4.97 | 3.93 |
| OTTHUMG00000176316 | 4.34 | 4.71 | 4.06 |
| PHYHIP             | 4.34 | 4.76 | 4.19 |
| CENPE              | 4.34 | 5.00 | 3.79 |
| DLG2               | 4.34 | 4.65 | 4.06 |
| THEGL              | 4.34 | 4.87 | 3.52 |
| ZNF467             | 4.34 | 4.75 | 4.07 |
| MLIP-AS1           | 4.34 | 5.00 | 3.90 |
| ZNF707             | 4.34 | 4.69 | 3.92 |
| RNA5SP507          | 4.34 | 4.93 | 3.86 |
| ALK                | 4.34 | 4.72 | 4.01 |
| FGFR4              | 4.33 | 4.75 | 3.87 |
| LINGO3             | 4.33 | 4.71 | 3.84 |
| OTTHUMG00000156028 | 4.33 | 5.00 | 3.53 |
| MIR668             | 4.33 | 5.36 | 3.51 |
| HRNR               | 4.33 | 5.05 | 3.30 |

|                     |      |      |      |
|---------------------|------|------|------|
| FAM217B             | 4.33 | 4.61 | 3.78 |
| RNA5-8SP2           | 4.33 | 5.06 | 3.54 |
| CAPSL               | 4.33 | 4.96 | 3.71 |
| B3GAT3              | 4.33 | 4.57 | 4.09 |
| MIR887              | 4.33 | 5.30 | 3.77 |
| CHRM1               | 4.33 | 4.93 | 3.80 |
| OTTHUMG00000017020  | 4.33 | 4.92 | 3.83 |
| ZNF648              | 4.33 | 4.80 | 3.95 |
| ADAMTSL1            | 4.33 | 4.90 | 3.76 |
| FCRLA               | 4.33 | 5.24 | 3.84 |
| NR1I3               | 4.33 | 4.58 | 3.91 |
| PIH1D2              | 4.33 | 4.92 | 3.87 |
| HCN1                | 4.33 | 5.14 | 4.00 |
| PWP2                | 4.33 | 4.60 | 3.92 |
| RCVRN               | 4.33 | 4.59 | 3.77 |
| OSTCP2              | 4.33 | 4.72 | 3.97 |
| TNFRSF10A           | 4.33 | 4.79 | 3.90 |
| FBXL18              | 4.33 | 4.80 | 3.98 |
| MIR499A             | 4.33 | 4.82 | 3.96 |
| KLHL22              | 4.33 | 4.62 | 3.96 |
| CHORDC1             | 4.33 | 4.70 | 3.54 |
| RND1                | 4.33 | 4.97 | 4.01 |
| OTTHUMG000000162679 | 4.33 | 4.66 | 3.97 |
| LOC100506136        | 4.33 | 4.86 | 4.01 |
| MIR585              | 4.33 | 4.70 | 3.88 |
| CLDN11              | 4.33 | 4.63 | 3.99 |
| LRRC37A4P           | 4.33 | 4.74 | 3.76 |
| SIRPG               | 4.33 | 4.86 | 3.70 |
| HAND1               | 4.33 | 4.74 | 4.06 |
| OTTHUMG00000013631  | 4.33 | 5.01 | 3.79 |
| BCL2L11             | 4.33 | 4.67 | 3.81 |
| WNT6                | 4.33 | 4.68 | 3.88 |
| ERC2-IT1            | 4.33 | 4.78 | 3.90 |
| RNA5SP344           | 4.33 | 5.13 | 3.76 |
| DLEU1               | 4.33 | 4.53 | 4.14 |
| ZNF888              | 4.33 | 4.76 | 3.63 |
| ATF3                | 4.33 | 4.83 | 3.62 |
| LOC100128554        | 4.33 | 4.63 | 4.01 |
| NUDT6               | 4.33 | 5.02 | 3.99 |
| L2HGDH              | 4.33 | 4.53 | 4.14 |
| EPCAM               | 4.33 | 4.82 | 3.93 |
| RAB42               | 4.33 | 4.76 | 3.75 |
| GRIK4               | 4.33 | 4.90 | 3.88 |
| NRADDP              | 4.33 | 4.60 | 3.94 |
| RBM15B              | 4.33 | 4.79 | 3.77 |
| PLA1A               | 4.33 | 4.69 | 4.18 |
| MIR181B1            | 4.33 | 5.04 | 3.69 |
| OTTHUMG000000172468 | 4.33 | 4.71 | 3.75 |
| FAM86EP             | 4.33 | 4.90 | 3.64 |

|                    |      |      |      |
|--------------------|------|------|------|
| CSNK1G2            | 4.33 | 4.65 | 2.91 |
| DPY19L2P1          | 4.33 | 4.96 | 3.86 |
| LOC440894          | 4.33 | 5.28 | 3.76 |
| KRT13              | 4.33 | 4.68 | 3.94 |
| OR10H5             | 4.33 | 4.99 | 3.67 |
| FXYD3              | 4.33 | 5.20 | 3.66 |
| RBMY1A1            | 4.33 | 5.41 | 3.22 |
| VANGL2             | 4.33 | 4.69 | 3.98 |
| SPATA32            | 4.33 | 4.86 | 3.89 |
| OTTHUMG00000144164 | 4.33 | 5.31 | 3.73 |
| TTY8               | 4.32 | 4.91 | 3.56 |
| DACT2              | 4.32 | 4.91 | 3.95 |
| OTTHUMG00000172085 | 4.32 | 4.64 | 4.08 |
| UNC45B             | 4.32 | 4.60 | 4.16 |
| AACSP1             | 4.32 | 4.87 | 3.62 |
| LOC100131395       | 4.32 | 4.66 | 3.94 |
| LY6K               | 4.32 | 5.31 | 3.97 |
| NCR3LG1            | 4.32 | 5.01 | 3.55 |
| RFXAP              | 4.32 | 4.65 | 3.75 |
| C3orf27            | 4.32 | 4.48 | 4.08 |
| KCNB1              | 4.32 | 4.94 | 3.68 |
| KCNA10             | 4.32 | 4.80 | 3.68 |
| MIR626             | 4.32 | 5.02 | 3.40 |
| DLX2               | 4.32 | 5.16 | 3.85 |
| KIF21A             | 4.32 | 4.73 | 4.01 |
| TMPRSS11D          | 4.32 | 4.66 | 4.09 |
| KRT14              | 4.32 | 4.75 | 4.02 |
| LOC100506881       | 4.32 | 4.63 | 3.80 |
| C15orf27           | 4.32 | 4.75 | 3.88 |
| ZNF444             | 4.32 | 4.57 | 3.91 |
| MAT1A              | 4.32 | 4.60 | 3.94 |
| MIR1270-1          | 4.32 | 4.72 | 4.00 |
| PLA2G2E            | 4.32 | 4.61 | 3.90 |
| LINC00651          | 4.32 | 4.64 | 4.14 |
| GPR139             | 4.32 | 4.61 | 4.01 |
| LINC00656          | 4.32 | 4.86 | 3.93 |
| MIR512-2           | 4.32 | 4.54 | 4.00 |
| MTNR1A             | 4.32 | 4.76 | 4.13 |
| LOC441728          | 4.32 | 5.23 | 3.70 |
| OTTHUMG00000090439 | 4.32 | 4.59 | 4.09 |
| FAM26E             | 4.32 | 4.62 | 3.55 |
| LOC63930           | 4.32 | 5.09 | 3.94 |
| JAZF1-AS1          | 4.32 | 4.88 | 3.87 |
| C9orf147           | 4.32 | 4.67 | 3.78 |
| C10orf62           | 4.32 | 4.80 | 3.97 |
| ADCY1              | 4.32 | 4.99 | 3.79 |
| OTTHUMG00000019300 | 4.32 | 4.90 | 3.51 |
| MMP17              | 4.32 | 4.56 | 3.94 |
| PCP2               | 4.32 | 5.01 | 3.97 |

|                    |      |      |      |
|--------------------|------|------|------|
| TRBV5-6            | 4.32 | 5.18 | 3.31 |
| DNAJC6             | 4.32 | 4.75 | 3.83 |
| HCRTR1             | 4.32 | 4.74 | 3.99 |
| MAPK13             | 4.32 | 4.60 | 4.15 |
| OTTHUMG00000166794 | 4.32 | 5.03 | 3.30 |
| ZNF699             | 4.32 | 4.92 | 3.34 |
| SLC25A30-AS1       | 4.32 | 5.05 | 3.64 |
| NUDT15             | 4.32 | 4.79 | 3.71 |
| C8orf86            | 4.32 | 4.86 | 3.86 |
| FOXRED2            | 4.32 | 4.64 | 3.88 |
| OTTHUMG00000019256 | 4.32 | 4.59 | 3.98 |
| ATXN80S            | 4.32 | 5.02 | 3.85 |
| GP1BA              | 4.32 | 4.66 | 3.62 |
| SHOX               | 4.32 | 4.56 | 3.99 |
| KIF26B             | 4.32 | 4.82 | 3.77 |
| NIPSNAP3B          | 4.32 | 4.67 | 3.81 |
| EHF                | 4.32 | 4.65 | 3.78 |
| CTRB2              | 4.32 | 5.03 | 3.78 |
| EHD3               | 4.32 | 4.78 | 3.83 |
| GPR97              | 4.32 | 4.91 | 3.78 |
| TMEM233            | 4.32 | 4.96 | 3.91 |
| GBP1               | 4.32 | 5.12 | 3.67 |
| OR1J4              | 4.32 | 5.35 | 3.57 |
| C11orf96           | 4.32 | 4.57 | 4.06 |
| ZNF440             | 4.32 | 4.66 | 3.67 |
| OTTHUMG00000015943 | 4.32 | 4.73 | 3.89 |
| BIN2               | 4.32 | 5.10 | 3.80 |
| KCNA3              | 4.31 | 4.74 | 3.93 |
| VBP1               | 4.31 | 4.78 | 3.89 |
| WNT8A              | 4.31 | 5.13 | 3.79 |
| CYB561D2           | 4.31 | 4.94 | 3.76 |
| OTTHUMG00000163534 | 4.31 | 4.73 | 4.01 |
| B4GALNT4           | 4.31 | 4.76 | 4.15 |
| MIR3681            | 4.31 | 4.98 | 3.60 |
| DBX2               | 4.31 | 4.68 | 4.06 |
| ZNF546             | 4.31 | 4.63 | 3.82 |
| SUSD4              | 4.31 | 4.72 | 3.55 |
| MIR3165            | 4.31 | 5.11 | 3.64 |
| OTTHUMG00000078370 | 4.31 | 4.81 | 3.81 |
| LOC100289092       | 4.31 | 4.74 | 3.87 |
| MIR1539            | 4.31 | 4.76 | 3.69 |
| FAM24B-CUZD1       | 4.31 | 4.71 | 3.89 |
| MUM1L1             | 4.31 | 4.62 | 3.80 |
| C10orf55           | 4.31 | 5.82 | 3.41 |
| ZNF852             | 4.31 | 4.63 | 3.86 |
| PLA2G10            | 4.31 | 5.31 | 3.63 |
| CACNA1A            | 4.31 | 6.03 | 3.65 |
| STAB2              | 4.31 | 4.74 | 4.02 |
| SUMF1              | 4.31 | 4.64 | 3.65 |

|                           |      |      |      |
|---------------------------|------|------|------|
| <i>TMEM155</i>            | 4.31 | 4.68 | 4.10 |
| <i>HTR1B</i>              | 4.31 | 4.73 | 3.91 |
| <i>SLC6A2</i>             | 4.31 | 4.84 | 3.93 |
| <i>PGBD4</i>              | 4.31 | 4.59 | 4.04 |
| <i>PCAT1</i>              | 4.31 | 5.02 | 3.85 |
| <i>MIR4306</i>            | 4.31 | 5.08 | 3.93 |
| <i>LOC151174</i>          | 4.31 | 4.74 | 3.86 |
| <i>MAP9</i>               | 4.31 | 4.85 | 3.93 |
| <i>APOF</i>               | 4.31 | 4.55 | 4.03 |
| <i>PDZD2</i>              | 4.31 | 4.58 | 3.92 |
| <i>FGF21</i>              | 4.31 | 4.60 | 3.86 |
| <i>LOC100130587</i>       | 4.31 | 4.75 | 4.11 |
| <i>KIF3C</i>              | 4.31 | 4.78 | 3.80 |
| <i>SH3RF3-AS1</i>         | 4.31 | 4.58 | 4.03 |
| <i>RHBDF2</i>             | 4.31 | 4.87 | 3.85 |
| <i>RNA5SP462</i>          | 4.31 | 4.79 | 3.71 |
| <i>CHST2</i>              | 4.31 | 4.58 | 4.11 |
| <i>SSR4P1</i>             | 4.31 | 4.60 | 3.99 |
| <i>GNG4</i>               | 4.31 | 4.64 | 3.98 |
| <i>LYZL4</i>              | 4.31 | 4.52 | 3.99 |
| <i>PAGE2B</i>             | 4.31 | 5.10 | 3.86 |
| <i>TNFRSF8</i>            | 4.31 | 4.63 | 3.88 |
| <i>OTTHUMG00000173391</i> | 4.31 | 4.86 | 3.57 |
| <i>PXDNL</i>              | 4.31 | 4.87 | 3.89 |
| <i>PLG</i>                | 4.31 | 5.12 | 3.77 |
| <i>DDX51</i>              | 4.31 | 4.57 | 4.06 |
| <i>TBC1D26</i>            | 4.31 | 4.91 | 3.83 |
| <i>GVQW1</i>              | 4.31 | 4.68 | 3.66 |
| <i>LSAMP-AS1</i>          | 4.31 | 4.71 | 3.93 |
| <i>CASS4</i>              | 4.31 | 4.86 | 3.49 |
| <i>SIX6</i>               | 4.31 | 4.81 | 3.92 |
| <i>FLJ35024</i>           | 4.31 | 4.86 | 3.87 |
| <i>NT5C3A</i>             | 4.31 | 4.55 | 3.80 |
| <i>BOD1L2</i>             | 4.31 | 4.58 | 3.75 |
| <i>ATP6V1C2</i>           | 4.31 | 4.69 | 4.03 |
| <i>BLACE</i>              | 4.31 | 4.98 | 3.69 |
| <i>PLEKHF1</i>            | 4.31 | 4.64 | 4.01 |
| <i>LOC285740</i>          | 4.31 | 4.65 | 4.06 |
| <i>C21orf54</i>           | 4.31 | 5.13 | 3.78 |
| <i>KLHL32</i>             | 4.31 | 4.65 | 3.86 |
| <i>MOCS3</i>              | 4.31 | 4.85 | 3.74 |
| <i>CYB561D1</i>           | 4.31 | 4.71 | 3.67 |
| <i>TRIM31</i>             | 4.31 | 4.69 | 3.91 |
| <i>ZNF672</i>             | 4.31 | 4.63 | 3.85 |
| <i>OTTHUMG00000168234</i> | 4.31 | 4.64 | 4.04 |
| <i>FADD</i>               | 4.31 | 4.63 | 3.82 |
| <i>TEX101</i>             | 4.31 | 5.08 | 3.75 |
| <i>KIAA1984-AS1</i>       | 4.31 | 4.79 | 4.08 |
| <i>XRCC2</i>              | 4.31 | 4.66 | 4.01 |

|                    |      |      |      |
|--------------------|------|------|------|
| KRTAP4-4           | 4.31 | 4.56 | 3.87 |
| AFAP1-AS1          | 4.31 | 4.58 | 4.13 |
| KCNE3              | 4.31 | 4.69 | 3.95 |
| SNX21              | 4.31 | 4.73 | 3.83 |
| OTTHUMG00000020898 | 4.31 | 4.72 | 3.92 |
| SPACA5             | 4.31 | 4.92 | 3.93 |
| FBXO6              | 4.31 | 4.73 | 3.86 |
| CCNE2              | 4.31 | 4.68 | 3.87 |
| VCY                | 4.31 | 4.56 | 4.06 |
| CHST7              | 4.30 | 4.68 | 3.66 |
| BTBD11             | 4.30 | 4.96 | 3.86 |
| UTS2R              | 4.30 | 4.77 | 3.75 |
| PDE1C              | 4.30 | 4.62 | 3.94 |
| FLJ37201           | 4.30 | 4.71 | 3.76 |
| RPS26              | 4.30 | 4.86 | 3.86 |
| LOC100129924       | 4.30 | 4.56 | 4.01 |
| IKBKG              | 4.30 | 4.85 | 3.97 |
| OTTHUMG00000020899 | 4.30 | 4.88 | 4.07 |
| AKAP4              | 4.30 | 4.61 | 4.03 |
| LOC100287813       | 4.30 | 4.91 | 3.87 |
| CYP17A1            | 4.30 | 4.96 | 3.89 |
| CASP14             | 4.30 | 4.73 | 3.74 |
| GFRA3              | 4.30 | 4.72 | 3.77 |
| COL4A4             | 4.30 | 4.56 | 4.01 |
| PRDM16             | 4.30 | 4.55 | 3.92 |
| ZNF287             | 4.30 | 4.66 | 3.78 |
| KIR2DS4            | 4.30 | 4.68 | 3.75 |
| ZNF653             | 4.30 | 4.49 | 3.87 |
| ZFR2               | 4.30 | 4.69 | 3.84 |
| LOC100506241       | 4.30 | 4.95 | 3.97 |
| IGSF22             | 4.30 | 4.67 | 3.89 |
| NR0B2              | 4.30 | 4.78 | 3.94 |
| TENM4              | 4.30 | 4.61 | 3.85 |
| HNF1A-AS1          | 4.30 | 4.79 | 4.08 |
| DNLZ               | 4.30 | 4.80 | 3.91 |
| KCNC1              | 4.30 | 4.51 | 4.05 |
| LOC100506585       | 4.30 | 4.54 | 4.06 |
| RPL36A-HNRNPH2     | 4.30 | 4.71 | 3.64 |
| GEN1               | 4.30 | 4.85 | 3.36 |
| CPNE4              | 4.30 | 4.55 | 3.97 |
| VILL               | 4.30 | 4.72 | 4.03 |
| RNU7-73P           | 4.30 | 4.97 | 3.63 |
| LINC00612          | 4.30 | 4.64 | 3.89 |
| LOC644090          | 4.30 | 4.71 | 3.88 |
| PRR15L             | 4.30 | 4.69 | 3.80 |
| FLJ35282           | 4.30 | 5.36 | 3.36 |
| NEUROG3            | 4.30 | 4.53 | 3.78 |
| GYG2P1             | 4.30 | 5.01 | 3.98 |
| LMO7-AS1           | 4.30 | 4.62 | 3.99 |

|                    |      |      |      |
|--------------------|------|------|------|
| SRD5A3-AS1         | 4.30 | 4.66 | 3.99 |
| OTTHUMG00000153426 | 4.30 | 4.89 | 3.75 |
| RPL23P8            | 4.30 | 5.20 | 3.49 |
| SPRR2C             | 4.30 | 4.97 | 3.40 |
| LIN9               | 4.30 | 4.73 | 3.79 |
| CCDC85C            | 4.30 | 4.67 | 3.88 |
| ZNF367             | 4.30 | 4.52 | 4.03 |
| LOC284889          | 4.30 | 4.82 | 3.64 |
| C1orf53            | 4.30 | 5.15 | 3.61 |
| FATE1              | 4.30 | 4.82 | 3.89 |
| TMC5               | 4.30 | 4.74 | 3.86 |
| NPY1R              | 4.30 | 4.84 | 3.72 |
| CPA1               | 4.30 | 4.72 | 3.81 |
| SLC13A5            | 4.30 | 4.94 | 3.77 |
| TOP1MT             | 4.30 | 4.52 | 3.90 |
| PRKAR2A-AS1        | 4.30 | 4.65 | 3.98 |
| CACNA1C-IT1        | 4.30 | 4.80 | 3.76 |
| LIPH               | 4.30 | 4.73 | 3.90 |
| FMR1-AS1           | 4.30 | 4.63 | 3.85 |
| OTTHUMG00000153861 | 4.30 | 4.75 | 3.76 |
| OTTHUMG00000153125 | 4.30 | 4.54 | 4.03 |
| AMHR2              | 4.30 | 4.66 | 4.12 |
| CDH6               | 4.30 | 5.03 | 3.81 |
| PATL2              | 4.30 | 4.62 | 3.84 |
| CACNA1E            | 4.30 | 4.46 | 4.08 |
| SRCRB4D            | 4.30 | 4.73 | 3.89 |
| ARHGEF4            | 4.30 | 4.57 | 3.91 |
| MSC                | 4.30 | 4.78 | 3.90 |
| UPK3A              | 4.30 | 4.66 | 4.01 |
| TP63               | 4.30 | 4.91 | 3.89 |
| FLJ37448           | 4.30 | 4.55 | 3.88 |
| EREG               | 4.30 | 4.75 | 3.70 |
| ZNF540             | 4.29 | 4.55 | 4.06 |
| LRP5               | 4.29 | 4.53 | 3.79 |
| C1orf216           | 4.29 | 4.67 | 3.44 |
| LOC339975          | 4.29 | 4.80 | 3.58 |
| C6orf123           | 4.29 | 5.06 | 3.71 |
| SLC4A9             | 4.29 | 4.87 | 3.67 |
| AMIGO3             | 4.29 | 4.72 | 3.93 |
| LOC388553          | 4.29 | 4.67 | 3.98 |
| FUT1               | 4.29 | 4.80 | 3.78 |
| SNAI3-AS1          | 4.29 | 4.88 | 3.87 |
| LOC728339          | 4.29 | 4.78 | 3.91 |
| LINC00052          | 4.29 | 4.79 | 3.47 |
| TCP10L             | 4.29 | 4.89 | 3.91 |
| ECHDC3             | 4.29 | 4.55 | 3.94 |
| CCDC3              | 4.29 | 4.72 | 3.90 |
| GINS1              | 4.29 | 4.72 | 3.91 |
| FAM196B            | 4.29 | 4.59 | 4.02 |

|                    |      |      |      |
|--------------------|------|------|------|
| SLITRK2            | 4.29 | 4.65 | 4.14 |
| CRB1               | 4.29 | 4.68 | 4.00 |
| POPDC3             | 4.29 | 4.62 | 3.92 |
| AKR1CL1            | 4.29 | 4.71 | 3.92 |
| RECQL4             | 4.29 | 4.76 | 3.96 |
| CYMP               | 4.29 | 4.74 | 4.00 |
| KRBA1              | 4.29 | 4.65 | 3.82 |
| MIR4753            | 4.29 | 5.25 | 3.91 |
| DCLRE1C            | 4.29 | 4.58 | 4.00 |
| LOC399744          | 4.29 | 4.67 | 3.75 |
| OTTHUMG00000003649 | 4.29 | 4.73 | 3.77 |
| CASC2              | 4.29 | 4.98 | 3.98 |
| ITGAL              | 4.29 | 4.87 | 3.81 |
| HLTF-AS1           | 4.29 | 4.68 | 3.86 |
| LOC100134368       | 4.29 | 4.97 | 3.72 |
| OTTHUMG00000169209 | 4.29 | 5.05 | 3.57 |
| TRAF1              | 4.29 | 4.61 | 4.03 |
| IDO2               | 4.29 | 4.62 | 3.90 |
| LOC100130987       | 4.29 | 4.65 | 4.05 |
| PRAMEF3            | 4.29 | 4.88 | 3.43 |
| P2RY13             | 4.29 | 4.61 | 3.70 |
| DHRS13             | 4.29 | 4.81 | 3.87 |
| TMEM249            | 4.29 | 4.74 | 3.85 |
| PGM5               | 4.29 | 4.86 | 3.94 |
| CCDC64             | 4.29 | 5.18 | 4.03 |
| NAALADL2-AS1       | 4.29 | 4.60 | 3.92 |
| LRRC2              | 4.29 | 4.71 | 3.77 |
| RHOXF1             | 4.29 | 4.85 | 4.04 |
| CLEC4G             | 4.29 | 4.72 | 3.99 |
| C10orf95           | 4.29 | 4.64 | 3.96 |
| ZNF628             | 4.29 | 4.86 | 3.57 |
| CUX2               | 4.29 | 4.95 | 3.72 |
| FLJ16126           | 4.29 | 4.72 | 3.78 |
| TTC23L             | 4.29 | 4.62 | 3.95 |
| VSX2               | 4.29 | 4.66 | 3.67 |
| KRTAP13-1          | 4.29 | 4.72 | 3.87 |
| RSAD2              | 4.29 | 5.26 | 3.43 |
| ZSCAN5A            | 4.29 | 4.85 | 3.84 |
| OR4F5              | 4.29 | 5.33 | 3.33 |
| GPR113             | 4.29 | 4.79 | 3.68 |
| LRRC37A11P         | 4.29 | 4.57 | 3.84 |
| RAD21-AS1          | 4.29 | 4.61 | 3.64 |
| FANCD2             | 4.29 | 4.72 | 4.00 |
| KLHL10             | 4.29 | 4.85 | 3.95 |
| ZNF649             | 4.29 | 4.96 | 3.81 |
| TSKS               | 4.29 | 4.85 | 3.94 |
| LONRF3             | 4.29 | 4.68 | 3.77 |
| OTTHUMG00000155454 | 4.29 | 4.66 | 3.96 |
| LOC441601          | 4.29 | 4.76 | 3.85 |



|                    |      |      |      |
|--------------------|------|------|------|
| SERP2              | 4.29 | 4.75 | 3.72 |
| SYNDIG1            | 4.29 | 4.94 | 3.16 |
| RPL21P44           | 4.29 | 4.86 | 3.40 |
| OTTHUMG00000162399 | 4.29 | 5.15 | 3.65 |
| PRDM14             | 4.29 | 4.73 | 3.96 |
| MIR25              | 4.29 | 4.95 | 3.52 |
| C6orf164           | 4.29 | 4.70 | 3.77 |
| AIFM2              | 4.29 | 4.54 | 3.81 |
| LOC400553          | 4.29 | 4.70 | 3.94 |
| PCDHB19P           | 4.29 | 4.73 | 3.78 |
| EFNB3              | 4.29 | 4.73 | 4.07 |
| LOC100129316       | 4.29 | 4.69 | 3.85 |
| PADI3              | 4.29 | 4.83 | 3.83 |
| ENOX1-AS2          | 4.29 | 4.89 | 3.76 |
| GPR25              | 4.29 | 4.65 | 3.77 |
| FKBP6              | 4.29 | 4.74 | 3.77 |
| OTTHUMG00000022248 | 4.29 | 4.75 | 3.74 |
| DEFB131            | 4.29 | 4.85 | 3.13 |
| ST13               | 4.29 | 4.57 | 4.02 |
| DIRC3              | 4.29 | 4.86 | 3.63 |
| FAM196A            | 4.28 | 4.66 | 4.03 |
| OTTHUMG00000176975 | 4.28 | 4.59 | 4.08 |
| LY86-AS1           | 4.28 | 4.86 | 3.80 |
| OR10S1             | 4.28 | 5.20 | 3.44 |
| OPLAH              | 4.28 | 4.73 | 3.95 |
| LOC553103          | 4.28 | 4.68 | 3.87 |
| C2orf81            | 4.28 | 4.56 | 3.89 |
| KRTAP1-3           | 4.28 | 4.83 | 3.88 |
| OTTHUMG00000172340 | 4.28 | 4.71 | 3.93 |
| PRDM6              | 4.28 | 5.09 | 3.74 |
| HGFAC              | 4.28 | 4.83 | 4.00 |
| LDOC1L             | 4.28 | 4.84 | 3.84 |
| OTTHUMG00000180596 | 4.28 | 4.73 | 3.96 |
| CMTM2              | 4.28 | 4.62 | 3.86 |
| FLJ46365           | 4.28 | 4.88 | 3.68 |
| ZNF585B            | 4.28 | 4.63 | 3.74 |
| PKP1               | 4.28 | 4.72 | 4.02 |
| ZWINT              | 4.28 | 4.67 | 3.65 |
| NUGGC              | 4.28 | 4.60 | 3.91 |
| MIR32              | 4.28 | 4.82 | 3.88 |
| ANKRD66            | 4.28 | 5.00 | 3.69 |
| SCML1              | 4.28 | 4.63 | 3.81 |
| NEB                | 4.28 | 4.47 | 4.05 |
| RD3L               | 4.28 | 5.03 | 3.78 |
| LOC100507930       | 4.28 | 4.68 | 3.94 |
| FBXO41             | 4.28 | 4.52 | 4.06 |
| CECR5-AS1          | 4.28 | 4.78 | 3.86 |
| ACER2              | 4.28 | 4.56 | 3.90 |
| SCTR               | 4.28 | 4.88 | 3.69 |

|                    |      |      |      |
|--------------------|------|------|------|
| ZNF569             | 4.28 | 4.62 | 3.77 |
| MRPL52             | 4.28 | 4.83 | 3.86 |
| HBCBP              | 4.28 | 5.12 | 3.86 |
| AIDA               | 4.28 | 4.89 | 3.84 |
| PDIA3              | 4.28 | 4.96 | 3.28 |
| OR4A5              | 4.28 | 5.00 | 3.86 |
| LINC00427          | 4.28 | 4.67 | 4.03 |
| VENTX              | 4.28 | 4.70 | 3.96 |
| LLGL2              | 4.28 | 4.66 | 3.84 |
| RPS7P5             | 4.28 | 4.80 | 3.84 |
| GPR84              | 4.28 | 4.80 | 3.88 |
| JAZF1              | 4.28 | 4.56 | 3.90 |
| KIF1A              | 4.28 | 4.60 | 3.93 |
| OTTHUMG00000163170 | 4.28 | 4.84 | 4.01 |
| OTTHUMG00000163385 | 4.28 | 4.47 | 4.07 |
| LOC100287015       | 4.28 | 4.83 | 3.87 |
| TTY23              | 4.28 | 5.12 | 3.60 |
| NDUFAF6            | 4.28 | 4.75 | 4.02 |
| ABHD1              | 4.28 | 4.61 | 3.97 |
| C1orf191           | 4.28 | 4.73 | 3.86 |
| CHST8              | 4.28 | 4.56 | 4.10 |
| OTTHUMG00000163526 | 4.28 | 4.67 | 3.78 |
| KRT35              | 4.28 | 5.01 | 3.78 |
| NEUROD2            | 4.28 | 4.67 | 3.75 |
| LOC100505532       | 4.28 | 4.93 | 3.94 |
| FLJ16779           | 4.28 | 4.54 | 4.07 |
| SERPINA12          | 4.28 | 4.61 | 3.85 |
| DPPA3              | 4.28 | 4.82 | 3.73 |
| OTTHUMG00000171847 | 4.28 | 4.89 | 3.43 |
| CD163L1            | 4.28 | 4.87 | 3.65 |
| OR10H4             | 4.28 | 5.00 | 2.97 |
| TNFAIP8L1          | 4.28 | 4.51 | 3.61 |
| IP6K3              | 4.28 | 4.57 | 3.86 |
| LCA5               | 4.28 | 4.69 | 3.77 |
| LINC00615          | 4.28 | 4.74 | 3.91 |
| OOSP1              | 4.28 | 4.65 | 3.76 |
| MAGEC1             | 4.28 | 5.08 | 3.49 |
| BTNL3              | 4.28 | 4.75 | 3.68 |
| OR2L2              | 4.28 | 4.69 | 4.05 |
| GFOD2              | 4.28 | 4.79 | 3.87 |
| ENPP4              | 4.27 | 4.77 | 3.67 |
| HBB                | 4.27 | 5.46 | 3.13 |
| FTCDNL1            | 4.27 | 4.52 | 3.82 |
| ST14               | 4.27 | 4.76 | 4.00 |
| VPS37D             | 4.27 | 4.63 | 3.58 |
| RNA5SP274          | 4.27 | 4.98 | 3.73 |
| CEP85L             | 4.27 | 4.65 | 4.01 |
| LOC391722          | 4.27 | 4.83 | 3.85 |
| GEMIN7             | 4.27 | 4.79 | 3.65 |

|                    |      |      |      |
|--------------------|------|------|------|
| OTTHUMG00000162515 | 4.27 | 4.75 | 3.80 |
| OTTHUMG00000002203 | 4.27 | 5.30 | 3.51 |
| C8orf87            | 4.27 | 4.84 | 3.96 |
| FLJ22447           | 4.27 | 4.80 | 3.95 |
| C1orf172           | 4.27 | 4.50 | 3.68 |
| ESM1               | 4.27 | 4.82 | 3.95 |
| TRIM36             | 4.27 | 4.52 | 3.99 |
| LRRC3-AS1          | 4.27 | 4.62 | 3.68 |
| CALCA              | 4.27 | 5.08 | 3.65 |
| LILRA2             | 4.27 | 5.05 | 3.57 |
| TREML4             | 4.27 | 4.72 | 3.91 |
| SNORD113-7         | 4.27 | 4.97 | 3.85 |
| SERTM1             | 4.27 | 4.70 | 3.61 |
| OTTHUMG00000160313 | 4.27 | 4.63 | 3.78 |
| GCSAML-AS1         | 4.27 | 4.63 | 3.96 |
| LURAP1L            | 4.27 | 4.80 | 3.38 |
| C15orf62           | 4.27 | 4.45 | 3.76 |
| LOC100652791       | 4.27 | 4.97 | 3.83 |
| MLF1IP             | 4.27 | 4.55 | 4.02 |
| SNORD58C           | 4.27 | 4.88 | 3.59 |
| ZNF865             | 4.27 | 4.85 | 3.91 |
| MIR640             | 4.27 | 4.88 | 3.43 |
| LOC100127888       | 4.27 | 4.85 | 3.65 |
| MIR4274            | 4.27 | 5.10 | 3.90 |
| IRF5               | 4.27 | 4.67 | 3.99 |
| SSX2               | 4.27 | 4.60 | 3.76 |
| ADAMTS19           | 4.27 | 4.74 | 3.57 |
| LINC00449          | 4.27 | 4.69 | 3.97 |
| OTTHUMG00000154291 | 4.27 | 4.54 | 3.78 |
| BDH1               | 4.27 | 4.52 | 3.95 |
| ARMC6              | 4.27 | 4.59 | 4.04 |
| C11orf21           | 4.27 | 4.86 | 3.71 |
| SLC2A8             | 4.27 | 4.51 | 3.93 |
| OTTHUMG00000032044 | 4.27 | 4.98 | 3.54 |
| OTTHUMG00000017792 | 4.27 | 5.02 | 3.51 |
| SLC52A3            | 4.27 | 4.69 | 3.81 |
| OR5R1              | 4.27 | 4.88 | 3.61 |
| ADRA2A             | 4.27 | 4.56 | 3.73 |
| TEAD3              | 4.27 | 4.85 | 3.62 |
| PAPOLB             | 4.27 | 4.80 | 3.56 |
| TFPI2              | 4.27 | 4.94 | 3.77 |
| FLJ46361           | 4.27 | 4.82 | 3.79 |
| DLGAP1-AS3         | 4.27 | 4.77 | 3.74 |
| AJUBA              | 4.27 | 4.69 | 3.81 |
| ST8SIA4            | 4.27 | 5.02 | 3.65 |
| AQP8               | 4.27 | 4.59 | 3.50 |
| VIPR2              | 4.27 | 4.60 | 3.92 |
| LINC00280          | 4.27 | 5.22 | 3.33 |
| C13orf45           | 4.27 | 4.64 | 3.85 |

|                            |      |      |      |
|----------------------------|------|------|------|
| <i>PDE4B</i>               | 4.27 | 4.59 | 4.00 |
| <i>FLJ45513</i>            | 4.27 | 4.60 | 3.73 |
| <i>DLX1</i>                | 4.27 | 4.94 | 3.71 |
| <i>OTTHUMG00000017959</i>  | 4.27 | 4.83 | 3.42 |
| <i>OTTHUMG00000020610</i>  | 4.27 | 4.93 | 4.01 |
| <i>BRF2</i>                | 4.27 | 4.49 | 3.93 |
| <i>ECE2</i>                | 4.27 | 4.61 | 4.02 |
| <i>MNX1</i>                | 4.27 | 4.58 | 3.84 |
| <i>ACE</i>                 | 4.26 | 4.65 | 3.87 |
| <i>ANKRD24</i>             | 4.26 | 4.90 | 3.68 |
| <i>C9orf152</i>            | 4.26 | 4.78 | 3.92 |
| <i>C1orf198</i>            | 4.26 | 4.57 | 3.81 |
| <i>OTTHUMG000000168607</i> | 4.26 | 4.86 | 3.84 |
| <i>NMNAT3</i>              | 4.26 | 4.60 | 3.91 |
| <i>LOC100507108</i>        | 4.26 | 4.71 | 3.79 |
| <i>MRAS</i>                | 4.26 | 4.74 | 3.54 |
| <i>DMRT3</i>               | 4.26 | 4.70 | 3.90 |
| <i>OTTHUMG000000151413</i> | 4.26 | 4.70 | 3.86 |
| <i>MID1IP1-AS1</i>         | 4.26 | 4.53 | 3.74 |
| <i>GJA3</i>                | 4.26 | 4.41 | 3.90 |
| <i>MIR4708</i>             | 4.26 | 4.71 | 3.76 |
| <i>IGJ</i>                 | 4.26 | 5.73 | 3.53 |
| <i>TMSB15B</i>             | 4.26 | 4.75 | 3.94 |
| <i>EXO5</i>                | 4.26 | 4.72 | 3.97 |
| <i>COLEC11</i>             | 4.26 | 4.59 | 4.07 |
| <i>PDE8B</i>               | 4.26 | 4.69 | 3.73 |
| <i>RP1L1</i>               | 4.26 | 4.73 | 3.58 |
| <i>ITGA2</i>               | 4.26 | 5.05 | 3.74 |
| <i>KLRC2</i>               | 4.26 | 4.72 | 3.54 |
| <i>SNORA35</i>             | 4.26 | 4.67 | 3.80 |
| <i>SH2B2</i>               | 4.26 | 4.66 | 3.99 |
| <i>KRT10</i>               | 4.26 | 4.49 | 3.92 |
| <i>RNASE13</i>             | 4.26 | 4.74 | 3.90 |
| <i>C2orf88</i>             | 4.26 | 4.37 | 4.00 |
| <i>OTTHUMG000000163341</i> | 4.26 | 4.67 | 4.03 |
| <i>GUSBP10</i>             | 4.26 | 4.77 | 3.50 |
| <i>MCAT</i>                | 4.26 | 4.89 | 3.85 |
| <i>RIN3</i>                | 4.26 | 4.68 | 3.59 |
| <i>FARP1-IT1</i>           | 4.26 | 4.48 | 3.72 |
| <i>CACNG1</i>              | 4.26 | 4.81 | 3.99 |
| <i>MUC17</i>               | 4.26 | 4.75 | 3.81 |
| <i>SOAT2</i>               | 4.26 | 4.65 | 3.84 |
| <i>ERCC8</i>               | 4.26 | 4.46 | 3.90 |
| <i>DISC2</i>               | 4.26 | 4.81 | 3.78 |
| <i>LOC648691</i>           | 4.26 | 4.77 | 3.52 |
| <i>FAM84A</i>              | 4.26 | 4.52 | 3.87 |
| <i>C22orf43</i>            | 4.26 | 4.75 | 3.77 |
| <i>MAPK15</i>              | 4.26 | 4.61 | 3.74 |
| <i>RFC4</i>                | 4.26 | 4.57 | 3.92 |

|                    |      |      |      |
|--------------------|------|------|------|
| GNG8               | 4.26 | 4.60 | 3.82 |
| PLA2G2F            | 4.26 | 4.68 | 3.91 |
| SLC35G1            | 4.26 | 4.49 | 3.65 |
| OPN3               | 4.26 | 4.49 | 4.04 |
| CACNA1B            | 4.26 | 4.70 | 3.88 |
| SH2D2A             | 4.26 | 4.71 | 3.69 |
| IDH1-AS1           | 4.26 | 4.55 | 3.80 |
| MYB-AS1            | 4.26 | 4.72 | 3.92 |
| C19orf45           | 4.26 | 4.63 | 4.02 |
| ACTL10             | 4.26 | 4.75 | 3.93 |
| SNORA70B           | 4.26 | 4.94 | 3.42 |
| VRTN               | 4.26 | 4.64 | 3.52 |
| OTTHUMG00000078325 | 4.26 | 4.45 | 4.03 |
| LINC00859          | 4.26 | 4.74 | 3.95 |
| ADCYAP1            | 4.26 | 4.76 | 3.81 |
| LILRA6             | 4.26 | 5.58 | 3.09 |
| OTTHUMG00000160312 | 4.25 | 4.67 | 3.73 |
| TMEM26             | 4.25 | 4.71 | 3.90 |
| NEUROD4            | 4.25 | 4.75 | 3.85 |
| SLC2A4             | 4.25 | 4.71 | 3.70 |
| CHRNA4             | 4.25 | 4.49 | 3.92 |
| FLJ25917           | 4.25 | 4.57 | 3.92 |
| CHCHD7             | 4.25 | 4.65 | 3.97 |
| MIR4462            | 4.25 | 4.77 | 3.57 |
| LSAMP              | 4.25 | 4.63 | 3.74 |
| PMS1               | 4.25 | 4.55 | 3.88 |
| KRBOX1             | 4.25 | 4.74 | 3.76 |
| SLC26A8            | 4.25 | 4.86 | 3.73 |
| ZFHX4-AS1          | 4.25 | 4.58 | 3.50 |
| SLC17A7            | 4.25 | 4.62 | 3.99 |
| LOC100270746       | 4.25 | 4.68 | 3.55 |
| MCIDAS             | 4.25 | 4.75 | 3.83 |
| POU2AF1            | 4.25 | 4.49 | 3.75 |
| MAP6               | 4.25 | 4.59 | 3.89 |
| ATG10-AS1          | 4.25 | 4.69 | 3.39 |
| RAD51C             | 4.25 | 4.65 | 3.82 |
| FLJ44385           | 4.25 | 4.52 | 3.83 |
| WFDC5              | 4.25 | 4.62 | 3.83 |
| DDX26B-AS1         | 4.25 | 4.85 | 3.84 |
| FOXI2              | 4.25 | 4.51 | 4.05 |
| SLC1A2             | 4.25 | 4.54 | 3.77 |
| PRR24              | 4.25 | 4.71 | 3.80 |
| PRR15              | 4.25 | 4.84 | 3.82 |
| SRD5A3             | 4.25 | 4.77 | 3.73 |
| FGF23              | 4.25 | 4.96 | 3.66 |
| HIST1H3J           | 4.25 | 5.14 | 3.61 |
| GPX2               | 4.25 | 4.45 | 3.72 |
| SLC16A11           | 4.25 | 4.67 | 3.78 |
| PLEKHG4B           | 4.25 | 4.52 | 3.88 |

|                    |      |      |      |
|--------------------|------|------|------|
| LOC284950          | 4.25 | 4.55 | 3.77 |
| LOC286083          | 4.25 | 4.74 | 3.89 |
| LAMB3              | 4.25 | 4.60 | 3.98 |
| C15orf59           | 4.25 | 4.71 | 3.79 |
| GLB1L              | 4.25 | 4.59 | 3.82 |
| LINC00398          | 4.25 | 4.56 | 3.70 |
| LOC731779          | 4.25 | 4.86 | 3.88 |
| KCNA2              | 4.25 | 4.87 | 3.76 |
| ACY3               | 4.25 | 4.78 | 3.96 |
| FABP5P3            | 4.25 | 4.94 | 3.92 |
| OTTHUMG00000161141 | 4.25 | 4.62 | 3.78 |
| OR2V2              | 4.25 | 5.46 | 2.87 |
| LRRC26             | 4.25 | 4.82 | 3.59 |
| C19orf59           | 4.25 | 4.50 | 3.94 |
| MAGEE1             | 4.25 | 4.52 | 3.98 |
| LOC100132354       | 4.25 | 4.75 | 3.71 |
| LSMEM1             | 4.25 | 4.74 | 3.87 |
| OTTHUMG00000020779 | 4.25 | 4.98 | 3.75 |
| SEC62-AS1          | 4.25 | 5.32 | 3.25 |
| MMD                | 4.25 | 4.60 | 3.80 |
| GAS2L2             | 4.25 | 4.75 | 3.89 |
| HOXD12             | 4.25 | 4.88 | 3.79 |
| SLC45A3            | 4.25 | 4.58 | 3.80 |
| RSPH6A             | 4.25 | 4.70 | 3.93 |
| OTTHUMG00000170833 | 4.25 | 4.71 | 3.69 |
| IL19               | 4.25 | 4.73 | 3.91 |
| HPR                | 4.25 | 4.85 | 2.91 |
| PON3               | 4.24 | 5.05 | 3.43 |
| LOC100507162       | 4.24 | 4.53 | 3.88 |
| DNAH5              | 4.24 | 4.50 | 3.92 |
| SALL2              | 4.24 | 4.80 | 3.97 |
| ZSWIM4             | 4.24 | 4.45 | 3.86 |
| LOC646743          | 4.24 | 5.08 | 3.65 |
| NMS                | 4.24 | 4.86 | 3.72 |
| LOC100506385       | 4.24 | 4.80 | 3.68 |
| OTTHUMG00000151743 | 4.24 | 4.69 | 3.95 |
| RRS1               | 4.24 | 4.49 | 3.99 |
| ZP1                | 4.24 | 4.68 | 3.88 |
| KANK4              | 4.24 | 4.60 | 3.77 |
| OTTHUMG00000163588 | 4.24 | 4.65 | 3.97 |
| OTTHUMG00000172997 | 4.24 | 4.84 | 3.46 |
| CDRT7              | 4.24 | 4.86 | 3.66 |
| MUC4               | 4.24 | 4.53 | 3.96 |
| MIG7               | 4.24 | 4.71 | 3.90 |
| OTTHUMG00000155112 | 4.24 | 4.83 | 3.44 |
| PRSS38             | 4.24 | 4.83 | 3.92 |
| ABCA8              | 4.24 | 4.93 | 3.19 |
| OTTHUMG00000009145 | 4.24 | 4.65 | 4.03 |
| ALDH5A1            | 4.24 | 4.55 | 3.66 |

|                    |      |      |      |
|--------------------|------|------|------|
| FOXJ1              | 4.24 | 4.53 | 3.48 |
| LOC113230          | 4.24 | 4.66 | 3.69 |
| NARFL              | 4.24 | 4.49 | 3.93 |
| MRRF               | 4.24 | 5.14 | 3.18 |
| LOC339192          | 4.24 | 4.76 | 3.84 |
| MANSC4             | 4.24 | 4.53 | 3.89 |
| CLRN1              | 4.24 | 4.76 | 4.03 |
| OR52M1             | 4.24 | 4.50 | 3.91 |
| SNORD104           | 4.24 | 5.19 | 3.29 |
| CD8B               | 4.24 | 4.42 | 3.98 |
| DNAH9              | 4.24 | 4.43 | 3.96 |
| OTTHUMG00000178556 | 4.24 | 4.82 | 3.84 |
| HTR4               | 4.24 | 4.66 | 3.66 |
| DNASE1             | 4.24 | 4.83 | 3.99 |
| HCCAT3             | 4.24 | 4.90 | 3.69 |
| RDH13              | 4.24 | 4.60 | 3.93 |
| TLL10-AS1          | 4.24 | 4.71 | 3.90 |
| MIR551A            | 4.24 | 4.94 | 3.75 |
| KCNJ2-AS1          | 4.24 | 4.73 | 3.56 |
| NACAP1             | 4.24 | 4.73 | 3.78 |
| OR6C75             | 4.24 | 5.03 | 3.53 |
| ACN9               | 4.24 | 4.62 | 4.01 |
| ACSBG1             | 4.24 | 4.59 | 3.93 |
| RELN               | 4.24 | 4.55 | 3.86 |
| LOC100288846       | 4.24 | 4.60 | 3.82 |
| PTCHD4             | 4.24 | 5.00 | 3.75 |
| LOC283665          | 4.24 | 4.63 | 3.64 |
| HELB               | 4.24 | 4.70 | 3.91 |
| HSD17B2            | 4.24 | 4.88 | 3.93 |
| ZNF627             | 4.24 | 4.65 | 3.47 |
| NLRP10             | 4.24 | 4.76 | 3.78 |
| PSG3               | 4.24 | 5.02 | 3.73 |
| WDPCP              | 4.24 | 4.69 | 3.65 |
| NEBL-AS1           | 4.24 | 4.57 | 3.93 |
| ACER3              | 4.24 | 4.57 | 3.81 |
| SUSD3              | 4.24 | 4.51 | 3.97 |
| DUSP19             | 4.24 | 4.80 | 3.88 |
| NLRP6              | 4.24 | 4.76 | 3.82 |
| TNFSF8             | 4.24 | 5.70 | 3.58 |
| LOC643797          | 4.24 | 4.91 | 3.52 |
| C14orf178          | 4.24 | 4.99 | 3.94 |
| SLC6A13            | 4.24 | 4.57 | 4.03 |
| FAM227B            | 4.24 | 4.73 | 3.78 |
| OTTHUMG00000175407 | 4.24 | 4.73 | 3.88 |
| LOC100506317       | 4.23 | 4.54 | 3.81 |
| ZNF461             | 4.23 | 4.96 | 3.62 |
| EDDM3B             | 4.23 | 4.98 | 3.66 |
| ST3GAL6-AS1        | 4.23 | 4.71 | 3.76 |
| C6orf170           | 4.23 | 4.77 | 3.76 |

|                    |      |      |      |
|--------------------|------|------|------|
| ATG9B              | 4.23 | 4.79 | 3.89 |
| SYT3               | 4.23 | 4.59 | 3.78 |
| LIMD1-AS1          | 4.23 | 4.48 | 3.83 |
| FLJ46836           | 4.23 | 4.59 | 3.74 |
| GNAS-AS1           | 4.23 | 4.53 | 4.01 |
| PAR6G              | 4.23 | 4.70 | 3.78 |
| SCGB2B3P           | 4.23 | 4.54 | 3.69 |
| KLHDC7A            | 4.23 | 4.51 | 3.86 |
| CXADRP3            | 4.23 | 4.89 | 3.55 |
| MEST               | 4.23 | 5.20 | 3.42 |
| OTTHUMG00000165008 | 4.23 | 4.87 | 3.96 |
| OTTHUMG00000156244 | 4.23 | 4.72 | 3.68 |
| OPRD1              | 4.23 | 4.83 | 3.75 |
| ZFP92              | 4.23 | 4.42 | 3.91 |
| LOC340512          | 4.23 | 4.52 | 3.91 |
| LOC100996590       | 4.23 | 4.59 | 3.69 |
| LEP                | 4.23 | 5.75 | 3.53 |
| OTTHUMG00000017568 | 4.23 | 4.54 | 3.94 |
| C7orf57            | 4.23 | 4.70 | 3.91 |
| SNAP47-AS1         | 4.23 | 4.44 | 4.00 |
| RXFP3              | 4.23 | 4.55 | 3.56 |
| GUCY1B2            | 4.23 | 4.63 | 3.88 |
| DAZ3               | 4.23 | 5.76 | 3.26 |
| SERPINB2           | 4.23 | 4.58 | 3.71 |
| ZNF781             | 4.23 | 4.85 | 3.73 |
| OTTHUMG00000169548 | 4.23 | 4.59 | 3.87 |
| LOC400620          | 4.23 | 4.71 | 3.68 |
| NOBOX              | 4.23 | 4.63 | 3.60 |
| DOK6               | 4.23 | 4.83 | 3.44 |
| LOC153910          | 4.23 | 4.71 | 3.94 |
| NDUFB2             | 4.23 | 4.52 | 3.90 |
| RYR2               | 4.23 | 4.74 | 3.92 |
| IL18R1             | 4.23 | 4.49 | 3.96 |
| ANTXRL             | 4.23 | 4.70 | 3.80 |
| LINC00472          | 4.23 | 4.80 | 3.30 |
| OTTHUMG00000014380 | 4.23 | 4.80 | 3.60 |
| AGBL4              | 4.23 | 4.76 | 3.89 |
| PPFIA3             | 4.23 | 4.63 | 3.68 |
| SNORD58A           | 4.23 | 5.51 | 3.34 |
| TMEM68             | 4.23 | 4.55 | 3.91 |
| PTPRN              | 4.23 | 4.72 | 3.86 |
| SLC14A2            | 4.23 | 4.71 | 3.73 |
| TBC1D3P1-DHX40P1   | 4.23 | 4.87 | 3.77 |
| OTTHUMG00000132237 | 4.22 | 5.47 | 2.75 |
| AAED1              | 4.22 | 5.06 | 3.37 |
| KRTAP5-8           | 4.22 | 4.93 | 3.83 |
| C9orf129           | 4.22 | 4.64 | 3.88 |
| OR51T1             | 4.22 | 4.73 | 3.91 |
| KRT74              | 4.22 | 4.70 | 3.92 |



|                    |      |      |      |
|--------------------|------|------|------|
| VRK1               | 4.22 | 4.91 | 3.69 |
| FAM159B            | 4.22 | 4.74 | 3.59 |
| PLEKHH1            | 4.22 | 4.55 | 3.97 |
| TVP23A             | 4.22 | 4.89 | 3.73 |
| GRIP2              | 4.22 | 4.62 | 3.85 |
| FAM90A12P          | 4.22 | 4.67 | 3.84 |
| LOC100631378       | 4.22 | 4.43 | 3.92 |
| OTTHUMG00000022540 | 4.22 | 5.11 | 3.66 |
| FAM53B             | 4.22 | 4.47 | 3.94 |
| HSD52              | 4.22 | 4.55 | 3.99 |
| WNT10A             | 4.22 | 4.57 | 3.94 |
| OTTHUMG00000154837 | 4.22 | 4.86 | 3.70 |
| NR2E3              | 4.22 | 4.48 | 3.81 |
| OTTHUMG00000074395 | 4.22 | 4.51 | 3.75 |
| PTRHD1             | 4.22 | 4.48 | 3.96 |
| KRTAP4-2           | 4.22 | 4.64 | 3.60 |
| CCDC89             | 4.22 | 4.56 | 3.58 |
| LOC400692          | 4.22 | 4.53 | 3.85 |
| CDYL2              | 4.22 | 4.43 | 4.07 |
| C12orf54           | 4.22 | 4.52 | 3.92 |
| FLJ16341           | 4.22 | 4.63 | 3.59 |
| C4orf17            | 4.22 | 4.76 | 3.78 |
| RNU1-21P           | 4.22 | 4.67 | 3.30 |
| HSD17B12           | 4.22 | 4.39 | 3.87 |
| LOC100507071       | 4.22 | 4.74 | 3.98 |
| OTTHUMG00000159120 | 4.22 | 4.45 | 3.76 |
| GRK1               | 4.22 | 4.79 | 3.80 |
| SNORD116-30        | 4.22 | 5.23 | 3.14 |
| TRIM51             | 4.22 | 5.16 | 3.14 |
| SHROOM2            | 4.22 | 4.66 | 3.61 |
| LRRN4              | 4.22 | 4.57 | 3.86 |
| HMBS               | 4.22 | 4.48 | 3.81 |
| OTTHUMG00000160427 | 4.22 | 4.74 | 3.87 |
| C14orf177          | 4.22 | 4.60 | 3.98 |
| FARP1-AS1          | 4.22 | 4.98 | 3.68 |
| TBL2               | 4.22 | 4.76 | 3.90 |
| HAS1               | 4.22 | 4.53 | 3.60 |
| ICA1L              | 4.22 | 4.64 | 3.84 |
| PEG10              | 4.22 | 4.60 | 3.79 |
| LOC338817          | 4.22 | 4.69 | 3.62 |
| ZNF74              | 4.22 | 4.57 | 3.65 |
| OTTHUMG00000171511 | 4.22 | 5.03 | 3.72 |
| ZBTB5              | 4.22 | 4.47 | 3.95 |
| ANKRD33            | 4.22 | 4.68 | 3.89 |
| ADAM20             | 4.22 | 4.55 | 3.94 |
| LOC100506075       | 4.22 | 4.81 | 3.44 |
| MELK               | 4.22 | 5.14 | 3.37 |
| PRAMEF20           | 4.22 | 4.99 | 3.65 |
| ADAMTS7            | 4.22 | 4.60 | 3.73 |

|                    |      |      |      |
|--------------------|------|------|------|
| ZNF846             | 4.22 | 4.78 | 3.70 |
| LY96               | 4.22 | 5.07 | 3.36 |
| RBMV1J             | 4.22 | 5.40 | 3.26 |
| CRLF2              | 4.22 | 4.82 | 3.80 |
| OTTHUMG00000171772 | 4.22 | 4.89 | 3.69 |
| VPS9D1             | 4.22 | 4.53 | 3.82 |
| NAT16              | 4.22 | 4.60 | 3.65 |
| TMEM145            | 4.22 | 4.58 | 3.75 |
| RFK                | 4.22 | 4.50 | 3.80 |
| LOC100507006       | 4.22 | 5.00 | 3.64 |
| ZNF382             | 4.21 | 4.77 | 3.55 |
| FAM69C             | 4.21 | 4.74 | 3.79 |
| KCTD21-AS1         | 4.21 | 4.79 | 3.62 |
| OTTHUMG00000151357 | 4.21 | 4.67 | 3.71 |
| PDP1               | 4.21 | 4.53 | 3.97 |
| C5orf28            | 4.21 | 4.57 | 3.82 |
| RNA5SP105          | 4.21 | 4.69 | 3.61 |
| LINC00629          | 4.21 | 4.55 | 3.90 |
| FHDC1              | 4.21 | 4.73 | 3.20 |
| FLJ25715           | 4.21 | 4.46 | 3.74 |
| SMIM11P1           | 4.21 | 4.84 | 3.38 |
| OTTHUMG00000164540 | 4.21 | 4.69 | 3.74 |
| C21orf119          | 4.21 | 4.58 | 3.88 |
| GDA                | 4.21 | 4.44 | 3.81 |
| OTTHUMG00000019964 | 4.21 | 5.18 | 3.58 |
| OR11H2             | 4.21 | 5.16 | 3.57 |
| BPIFA3             | 4.21 | 4.69 | 3.84 |
| HMBOX1-IT1         | 4.21 | 4.67 | 3.71 |
| NIPAL2             | 4.21 | 4.39 | 3.76 |
| EBI3               | 4.21 | 4.51 | 3.88 |
| AMELX              | 4.21 | 4.98 | 3.73 |
| LOC401324          | 4.21 | 4.89 | 3.35 |
| DCTN1-AS1          | 4.21 | 4.46 | 4.02 |
| IL36G              | 4.21 | 4.74 | 3.82 |
| OTTHUMG00000162055 | 4.21 | 4.79 | 3.59 |
| DMRTA1             | 4.21 | 4.61 | 3.79 |
| TMEM52B            | 4.21 | 4.82 | 3.87 |
| FZD2               | 4.21 | 4.75 | 3.48 |
| ZNF471             | 4.21 | 5.11 | 3.44 |
| LOC100506236       | 4.21 | 4.99 | 3.88 |
| GPR89A             | 4.21 | 4.94 | 3.62 |
| MOBP               | 4.21 | 4.95 | 3.54 |
| GTDC2              | 4.21 | 4.52 | 3.94 |
| UPK1A              | 4.21 | 4.81 | 3.87 |
| GPR52              | 4.21 | 4.58 | 3.64 |
| RND2               | 4.21 | 4.63 | 3.85 |
| GPR112             | 4.21 | 5.03 | 3.74 |
| LINC00032          | 4.21 | 4.64 | 3.85 |
| UNQ6975            | 4.21 | 4.47 | 3.83 |

|                    |      |      |      |
|--------------------|------|------|------|
| NR4A1              | 4.21 | 4.66 | 3.64 |
| PVRL1              | 4.21 | 4.39 | 3.97 |
| TREH               | 4.21 | 4.55 | 3.93 |
| TRBV9              | 4.21 | 4.63 | 3.54 |
| OTTHUMG00000165055 | 4.21 | 4.99 | 3.58 |
| ZNF69              | 4.21 | 4.64 | 3.84 |
| PHKG1              | 4.21 | 4.67 | 3.31 |
| ZFAT-AS1           | 4.21 | 4.86 | 3.86 |
| LOC643339          | 4.21 | 4.55 | 3.86 |
| OTTHUMG00000178053 | 4.21 | 4.71 | 3.74 |
| ALDH8A1            | 4.21 | 4.43 | 3.85 |
| OTTHUMG00000162974 | 4.21 | 5.05 | 3.75 |
| RASL10A            | 4.21 | 4.70 | 3.86 |
| GJD4               | 4.21 | 4.59 | 3.72 |
| LOC100996570       | 4.21 | 4.69 | 3.85 |
| LOC100507651       | 4.21 | 4.61 | 3.87 |
| OTTHUMG00000158362 | 4.21 | 4.52 | 3.78 |
| IQCJ               | 4.21 | 4.60 | 3.69 |
| KIF25              | 4.21 | 4.59 | 3.49 |
| HSPB7              | 4.21 | 4.52 | 3.64 |
| SCARNA11           | 4.21 | 5.03 | 2.72 |
| EHHADH             | 4.20 | 4.69 | 3.68 |
| SP5                | 4.20 | 4.38 | 3.98 |
| ERICH1-AS1         | 4.20 | 4.54 | 3.73 |
| RNU4ATAC3P         | 4.20 | 5.18 | 3.40 |
| IL13               | 4.20 | 5.05 | 3.71 |
| OTTHUMG00000162158 | 4.20 | 5.06 | 3.69 |
| BREA2              | 4.20 | 4.64 | 3.72 |
| HES3               | 4.20 | 4.56 | 3.72 |
| CEP55              | 4.20 | 4.94 | 3.79 |
| LRRC8C             | 4.20 | 4.50 | 3.90 |
| OTTHUMG00000167194 | 4.20 | 4.99 | 3.45 |
| DOK5               | 4.20 | 5.50 | 3.30 |
| VWA3B              | 4.20 | 4.69 | 4.01 |
| C19orf73           | 4.20 | 4.56 | 3.77 |
| HSPB2-C11orf52     | 4.20 | 4.44 | 3.91 |
| OTTHUMG00000150840 | 4.20 | 4.46 | 3.85 |
| GREB1L             | 4.20 | 4.60 | 3.71 |
| DENND2A            | 4.20 | 4.66 | 3.57 |
| FRMD5              | 4.20 | 4.64 | 3.79 |
| PDCD6              | 4.20 | 4.62 | 3.66 |
| GPD1               | 4.20 | 4.74 | 3.74 |
| LOC100289495       | 4.20 | 4.59 | 3.95 |
| OTTHUMG00000074332 | 4.20 | 5.17 | 3.48 |
| HULC               | 4.20 | 4.51 | 3.93 |
| CLCN1              | 4.20 | 4.75 | 3.65 |
| LOC146481          | 4.20 | 4.97 | 3.24 |
| MCTS1              | 4.20 | 4.66 | 3.77 |
| OTTHUMG00000014325 | 4.20 | 4.59 | 3.98 |

|                    |      |      |      |
|--------------------|------|------|------|
| OTTHUMG00000011762 | 4.20 | 4.81 | 3.84 |
| PIM2               | 4.20 | 4.65 | 3.67 |
| OTTHUMG00000020886 | 4.20 | 4.61 | 3.85 |
| IRF7               | 4.20 | 4.53 | 3.90 |
| NR4A3              | 4.20 | 4.97 | 3.81 |
| FRMPD2             | 4.20 | 4.65 | 3.86 |
| CLEC19A            | 4.20 | 4.59 | 3.78 |
| LAMC3              | 4.20 | 4.75 | 3.77 |
| OBP2B              | 4.20 | 4.71 | 3.35 |
| ALAS2              | 4.20 | 4.79 | 3.70 |
| ANKEF1             | 4.20 | 4.57 | 3.80 |
| USP2-AS1           | 4.20 | 4.83 | 3.88 |
| DEFB107A           | 4.20 | 4.54 | 3.62 |
| RNA5SP165          | 4.20 | 4.85 | 2.92 |
| EPHA2              | 4.20 | 4.86 | 3.85 |
| OTTHUMG00000177103 | 4.20 | 4.81 | 3.63 |
| MIR2276            | 4.20 | 4.81 | 3.43 |
| STK24-AS1          | 4.20 | 4.49 | 3.94 |
| C7orf25            | 4.20 | 4.54 | 3.61 |
| NOVA1              | 4.20 | 4.58 | 3.68 |
| NAV3               | 4.20 | 4.66 | 3.71 |
| CD244              | 4.20 | 4.97 | 3.88 |
| DLG5-AS1           | 4.20 | 5.35 | 3.74 |
| SNX16              | 4.20 | 4.54 | 3.54 |
| MIR602             | 4.20 | 4.61 | 3.41 |
| LOC399884          | 4.20 | 4.86 | 3.66 |
| ZNF204P            | 4.20 | 4.83 | 3.31 |
| OTTHUMG00000152376 | 4.20 | 4.87 | 3.43 |
| MTUS2              | 4.20 | 4.48 | 3.80 |
| CHIT1              | 4.20 | 4.75 | 3.40 |
| RNA5SP352          | 4.20 | 5.18 | 3.61 |
| NUDT10             | 4.20 | 4.55 | 3.50 |
| OTTHUMG00000165718 | 4.20 | 4.75 | 3.66 |
| LOC100131662       | 4.20 | 4.52 | 3.84 |
| ZNF735             | 4.20 | 5.19 | 3.35 |
| MIR129-2           | 4.20 | 4.74 | 3.78 |
| MIR2117            | 4.20 | 4.71 | 3.74 |
| LOC100507091       | 4.20 | 4.62 | 3.31 |
| TRAJ26             | 4.20 | 5.28 | 3.40 |
| HPSE2              | 4.20 | 4.42 | 3.84 |
| SPEM1              | 4.20 | 4.64 | 3.68 |
| LIFR-AS1           | 4.20 | 4.53 | 3.47 |
| F7                 | 4.20 | 4.96 | 3.56 |
| ASB14              | 4.20 | 4.47 | 3.34 |
| SRRM2-AS1          | 4.19 | 4.64 | 3.71 |
| OTTHUMG00000032284 | 4.19 | 4.66 | 3.77 |
| OTTHUMG00000155365 | 4.19 | 4.68 | 3.81 |
| OTTHUMG00000163864 | 4.19 | 4.56 | 3.82 |
| LOC286442          | 4.19 | 4.45 | 3.97 |

|                    |      |      |      |
|--------------------|------|------|------|
| MOB2               | 4.19 | 4.50 | 3.79 |
| PKDREJ             | 4.19 | 4.62 | 3.18 |
| HLA-J              | 4.19 | 4.61 | 3.46 |
| NOS1               | 4.19 | 4.80 | 3.89 |
| RNA5SP129          | 4.19 | 4.98 | 3.53 |
| LOC100507003       | 4.19 | 4.59 | 3.93 |
| DAZ2               | 4.19 | 5.70 | 3.19 |
| ATP5L              | 4.19 | 4.39 | 3.82 |
| FRS3               | 4.19 | 4.48 | 3.75 |
| TCL6               | 4.19 | 4.72 | 3.90 |
| OTTHUMG00000163518 | 4.19 | 4.64 | 3.64 |
| SMIM2              | 4.19 | 4.61 | 3.83 |
| ASF1B              | 4.19 | 4.48 | 3.76 |
| CACNB2             | 4.19 | 4.73 | 3.81 |
| WDR16              | 4.19 | 4.71 | 3.67 |
| TUBAL3             | 4.19 | 4.57 | 3.59 |
| CBX8               | 4.19 | 4.68 | 3.60 |
| FBXO16             | 4.19 | 4.57 | 3.87 |
| GPR22              | 4.19 | 4.71 | 3.47 |
| OTTHUMG00000041395 | 4.19 | 4.52 | 3.71 |
| SERPINF2           | 4.19 | 4.99 | 3.57 |
| HTR5A              | 4.19 | 4.78 | 3.51 |
| TMIE               | 4.19 | 4.67 | 3.85 |
| RP11-631M21.1      | 4.19 | 5.32 | 3.55 |
| TOP1P1             | 4.19 | 4.57 | 3.74 |
| IL25               | 4.19 | 4.94 | 3.53 |
| TRUB1              | 4.19 | 4.68 | 3.63 |
| MYT1L              | 4.19 | 4.54 | 3.91 |
| UTP14A             | 4.19 | 5.07 | 3.68 |
| PLIN4              | 4.19 | 4.71 | 3.91 |
| IFIT1              | 4.19 | 5.07 | 3.50 |
| MIR320E            | 4.19 | 4.61 | 3.63 |
| C20orf26           | 4.19 | 4.53 | 3.83 |
| CLRN2              | 4.19 | 4.68 | 3.87 |
| PWRN2              | 4.19 | 4.77 | 3.64 |
| C18orf56           | 4.19 | 4.47 | 3.92 |
| CPNE7              | 4.19 | 4.74 | 3.84 |
| DNAJC9             | 4.19 | 4.76 | 2.88 |
| MAN1C1             | 4.19 | 4.51 | 3.75 |
| VMA21              | 4.19 | 4.51 | 3.83 |
| SPAG5              | 4.19 | 4.59 | 3.69 |
| ARMC12             | 4.19 | 4.53 | 3.88 |
| TUBA3D             | 4.19 | 4.92 | 3.61 |
| ZNF711             | 4.19 | 4.61 | 3.82 |
| WDR65              | 4.19 | 4.83 | 3.81 |
| OTTHUMG00000163338 | 4.19 | 5.21 | 3.67 |
| FOXN1              | 4.19 | 4.50 | 3.63 |
| SHANK2-AS1         | 4.19 | 4.46 | 3.80 |
| CABP5              | 4.19 | 5.28 | 3.82 |

|                    |      |      |      |
|--------------------|------|------|------|
| RNA5SP108          | 4.19 | 5.04 | 3.82 |
| LIPE-AS1           | 4.19 | 4.82 | 3.95 |
| OTTHUMG00000018554 | 4.19 | 4.80 | 3.41 |
| DCLK2              | 4.19 | 4.60 | 3.81 |
| ZNF812             | 4.19 | 4.63 | 3.77 |
| CD274              | 4.19 | 4.50 | 3.79 |
| IMPA2              | 4.19 | 4.43 | 3.92 |
| HIST1H3A           | 4.19 | 5.39 | 3.06 |
| LOC619207          | 4.19 | 4.44 | 3.95 |
| LOC100506289       | 4.19 | 4.56 | 3.85 |
| KRTAP10-7          | 4.19 | 4.77 | 3.45 |
| OTTHUMG00000032833 | 4.19 | 4.75 | 3.69 |
| SLC25A2            | 4.19 | 4.67 | 3.66 |
| PDE6A              | 4.19 | 4.62 | 3.55 |
| TUBBP5             | 4.19 | 4.94 | 3.68 |
| NXF5               | 4.19 | 4.70 | 3.61 |
| CD6                | 4.19 | 4.92 | 3.69 |
| CDC42BPG           | 4.19 | 4.42 | 4.04 |
| CCDC103            | 4.19 | 4.73 | 3.88 |
| FAM186B            | 4.19 | 4.75 | 3.81 |
| LAMB4              | 4.19 | 4.80 | 3.79 |
| IKZF3              | 4.18 | 4.47 | 3.71 |
| FAM76B             | 4.18 | 4.63 | 3.69 |
| DLEC1              | 4.18 | 4.62 | 3.79 |
| PSD4               | 4.18 | 4.58 | 3.94 |
| OTTHUMG00000163594 | 4.18 | 4.54 | 3.82 |
| DUOX2              | 4.18 | 4.55 | 3.77 |
| ZPLD1              | 4.18 | 4.60 | 3.74 |
| KLKB1              | 4.18 | 4.85 | 3.46 |
| LINC00528          | 4.18 | 4.80 | 3.56 |
| OTTHUMG00000179558 | 4.18 | 4.92 | 3.55 |
| OACYLP             | 4.18 | 4.70 | 3.73 |
| OTTHUMG00000031951 | 4.18 | 5.07 | 3.28 |
| POTEC              | 4.18 | 5.06 | 3.30 |
| ADRA2B             | 4.18 | 4.40 | 3.68 |
| OTTHUMG00000032051 | 4.18 | 4.58 | 3.75 |
| OTTHUMG00000017875 | 4.18 | 4.46 | 3.84 |
| TRPC7              | 4.18 | 4.59 | 3.73 |
| FGF19              | 4.18 | 4.79 | 3.55 |
| SLC8A3             | 4.18 | 4.64 | 3.62 |
| SPSB1              | 4.18 | 4.77 | 3.65 |
| KRTAP6-2           | 4.18 | 4.48 | 3.79 |
| MYOM3              | 4.18 | 4.44 | 4.00 |
| DKFZP434I0714      | 4.18 | 4.67 | 3.62 |
| MIR3936            | 4.18 | 5.03 | 3.48 |
| OTTHUMG00000172243 | 4.18 | 4.84 | 3.83 |
| OTTHUMG00000015353 | 4.18 | 4.59 | 3.87 |
| OTTHUMG00000171423 | 4.18 | 4.60 | 3.75 |
| ANP32AP1           | 4.18 | 4.70 | 3.74 |

|                    |      |      |      |
|--------------------|------|------|------|
| KBTBD13            | 4.18 | 4.79 | 3.63 |
| SH3TC2             | 4.18 | 4.71 | 3.57 |
| AADAACL2           | 4.18 | 4.44 | 4.01 |
| LINC00184          | 4.18 | 4.96 | 3.72 |
| DHX37              | 4.18 | 4.50 | 3.68 |
| OTTHUMG00000160619 | 4.18 | 4.87 | 3.57 |
| BTNL8              | 4.18 | 4.95 | 3.71 |
| DEFB136            | 4.18 | 4.79 | 3.60 |
| BDNF               | 4.18 | 4.45 | 3.65 |
| GPR148             | 4.18 | 4.81 | 3.77 |
| LHFPL1             | 4.18 | 4.54 | 3.76 |
| ATP6V0E2           | 4.18 | 4.78 | 3.69 |
| OTTHUMG00000162996 | 4.18 | 4.54 | 3.59 |
| MRO                | 4.18 | 4.57 | 3.77 |
| HCG18              | 4.18 | 4.35 | 3.88 |
| OTTHUMG00000003643 | 4.18 | 5.03 | 3.04 |
| SYNGR4             | 4.18 | 4.84 | 3.57 |
| ARHGAP26-AS1       | 4.18 | 4.63 | 3.85 |
| OTTHUMG00000019561 | 4.18 | 4.46 | 3.87 |
| ZNF215             | 4.18 | 4.71 | 3.69 |
| PROM1              | 4.18 | 4.60 | 3.87 |
| WBP11P1            | 4.18 | 4.91 | 3.63 |
| VAX1               | 4.18 | 4.59 | 3.90 |
| DNAAF2             | 4.18 | 4.90 | 3.60 |
| IGLV4-60           | 4.18 | 4.72 | 3.52 |
| DRD3               | 4.18 | 4.61 | 3.79 |
| LINC00705          | 4.18 | 4.75 | 3.67 |
| ASB9P1             | 4.18 | 4.86 | 3.76 |
| ELOVL2-AS1         | 4.18 | 4.61 | 3.90 |
| ACTR6              | 4.18 | 4.79 | 3.35 |
| OTTHUMG00000173079 | 4.18 | 4.64 | 3.84 |
| DKFZp686K1684      | 4.18 | 4.54 | 3.94 |
| WRAP73             | 4.18 | 4.73 | 4.03 |
| EDA                | 4.18 | 4.53 | 3.94 |
| LGR5               | 4.18 | 4.48 | 3.75 |
| MIR548K            | 4.18 | 4.80 | 3.42 |
| TIGD2              | 4.18 | 4.65 | 3.64 |
| TEKT5              | 4.18 | 4.66 | 3.29 |
| RNA5SP419          | 4.18 | 4.69 | 3.61 |
| GRAP2              | 4.18 | 4.63 | 3.62 |
| C5orf27            | 4.18 | 4.96 | 3.63 |
| SPEF1              | 4.18 | 4.52 | 3.79 |
| LOC642426          | 4.17 | 4.74 | 3.44 |
| LGI1               | 4.17 | 4.87 | 3.83 |
| RYR3               | 4.17 | 4.76 | 3.92 |
| GHRH               | 4.17 | 4.53 | 3.86 |
| OTTHUMG00000171678 | 4.17 | 4.48 | 3.69 |
| UBXN2B             | 4.17 | 4.71 | 3.61 |
| BTNL2              | 4.17 | 4.83 | 3.74 |

|                    |      |      |      |
|--------------------|------|------|------|
| OTTHUMG00000040900 | 4.17 | 4.63 | 3.57 |
| CDC42SE2           | 4.17 | 4.34 | 3.86 |
| PRKACG             | 4.17 | 4.47 | 3.96 |
| CENPW              | 4.17 | 5.06 | 2.61 |
| HAPLN4             | 4.17 | 4.80 | 3.51 |
| CIRBP-AS1          | 4.17 | 4.68 | 3.78 |
| MB21D1             | 4.17 | 4.61 | 3.52 |
| FLJ44006           | 4.17 | 4.90 | 3.82 |
| C1orf94            | 4.17 | 4.70 | 3.79 |
| OTTHUMG00000151708 | 4.17 | 4.55 | 3.58 |
| DYNAP              | 4.17 | 4.62 | 3.78 |
| SSH1               | 4.17 | 4.60 | 3.68 |
| RNA5SP439          | 4.17 | 4.83 | 3.48 |
| ATP10B             | 4.17 | 4.40 | 3.98 |
| OSBPL10-AS1        | 4.17 | 4.64 | 3.82 |
| YOD1               | 4.17 | 4.41 | 4.03 |
| DNAJC9-AS1         | 4.17 | 4.75 | 3.67 |
| SYP                | 4.17 | 4.54 | 3.82 |
| LOC284898          | 4.17 | 5.11 | 3.59 |
| MIR509-3           | 4.17 | 5.14 | 3.06 |
| PP2D1              | 4.17 | 4.77 | 3.66 |
| RHEBL1             | 4.17 | 4.63 | 3.67 |
| LOC391322          | 4.17 | 4.91 | 3.61 |
| LOC388282          | 4.17 | 4.66 | 3.73 |
| QPCT               | 4.17 | 4.57 | 3.73 |
| ITPK1-AS1          | 4.17 | 4.67 | 3.85 |
| RCHY1              | 4.17 | 4.74 | 3.63 |
| EME1               | 4.17 | 4.49 | 3.82 |
| TNFRSF13C          | 4.17 | 4.64 | 3.89 |
| ZFYVE28            | 4.17 | 5.08 | 3.32 |
| HOXB4              | 4.17 | 4.62 | 3.48 |
| LOC389641          | 4.17 | 4.69 | 3.72 |
| IFNG               | 4.17 | 5.03 | 3.68 |
| C10orf107          | 4.17 | 4.76 | 3.58 |
| FLT4               | 4.17 | 4.61 | 3.85 |
| PRAMEF19           | 4.17 | 4.56 | 3.67 |
| OTTHUMG00000153431 | 4.17 | 4.68 | 3.83 |
| OTTHUMG00000018428 | 4.17 | 4.68 | 3.69 |
| OTTHUMG00000169584 | 4.17 | 4.75 | 3.35 |
| EXOSC5             | 4.17 | 4.57 | 3.70 |
| LOC100507489       | 4.17 | 4.83 | 3.85 |
| C21orf49           | 4.17 | 4.51 | 3.87 |
| TRAV9-1            | 4.17 | 4.79 | 3.44 |
| RTP3               | 4.17 | 4.63 | 3.54 |
| LAMB2P1            | 4.17 | 4.71 | 3.74 |
| LOC100288842       | 4.17 | 4.71 | 3.59 |
| OTTHUMG00000014286 | 4.17 | 4.56 | 3.64 |
| OTTHUMG00000015298 | 4.17 | 4.72 | 3.88 |
| EVA1A              | 4.16 | 4.78 | 3.87 |



|                     |      |      |      |
|---------------------|------|------|------|
| SLAIN1              | 4.16 | 4.65 | 3.74 |
| LOC100128164        | 4.16 | 4.75 | 3.80 |
| SLAMF7              | 4.16 | 4.54 | 3.69 |
| SALL1               | 4.16 | 4.51 | 3.92 |
| WNK4                | 4.16 | 4.82 | 3.50 |
| MIR1243             | 4.16 | 4.92 | 3.50 |
| RBM26-AS1           | 4.16 | 4.63 | 3.73 |
| PLEKHA7             | 4.16 | 4.56 | 3.79 |
| TP53AIP1            | 4.16 | 4.45 | 3.89 |
| LOC387810           | 4.16 | 4.71 | 3.56 |
| ZNF831              | 4.16 | 4.68 | 3.83 |
| TMTC2               | 4.16 | 4.78 | 3.44 |
| OTTHUMG00000016631  | 4.16 | 4.53 | 3.91 |
| RAB44               | 4.16 | 4.71 | 3.52 |
| TTY5                | 4.16 | 4.75 | 3.67 |
| PANX2               | 4.16 | 4.54 | 3.73 |
| RIMS1               | 4.16 | 4.53 | 3.47 |
| EFCAB4B             | 4.16 | 4.57 | 3.72 |
| LOC100507403        | 4.16 | 4.73 | 3.66 |
| CKAP2L              | 4.16 | 4.70 | 3.58 |
| FMO1                | 4.16 | 4.63 | 3.80 |
| TRAIP               | 4.16 | 4.55 | 3.81 |
| LOC100289308        | 4.16 | 4.62 | 3.72 |
| LOC644936           | 4.16 | 4.92 | 3.20 |
| CHRNA4              | 4.16 | 4.46 | 3.93 |
| RNA5SP137           | 4.16 | 4.66 | 3.71 |
| MIR146A             | 4.16 | 4.55 | 3.48 |
| OTTHUMG000000164202 | 4.16 | 4.72 | 3.32 |
| TCP10               | 4.16 | 4.63 | 3.57 |
| SLCO5A1             | 4.16 | 4.52 | 3.89 |
| OR51H1P             | 4.16 | 4.65 | 3.80 |
| TMEM139             | 4.16 | 4.59 | 3.66 |
| ENO4                | 4.16 | 4.36 | 3.74 |
| CHRDL1              | 4.16 | 4.59 | 3.68 |
| RPS6KA2-AS1         | 4.16 | 4.72 | 3.88 |
| GSTT2               | 4.16 | 4.74 | 3.49 |
| NSG1                | 4.16 | 4.43 | 3.76 |
| OTTHUMG000000058513 | 4.16 | 4.48 | 3.89 |
| UNC79               | 4.16 | 4.69 | 3.79 |
| OTTHUMG000000151817 | 4.16 | 4.97 | 3.56 |
| IGHV3-38            | 4.16 | 4.94 | 3.54 |
| PHGR1               | 4.16 | 4.62 | 3.79 |
| E2F7                | 4.16 | 4.56 | 3.76 |
| NTNG2               | 4.16 | 4.41 | 3.93 |
| JAKMIP2-AS1         | 4.16 | 4.56 | 3.70 |
| LOC100506013        | 4.16 | 4.53 | 3.30 |
| ALPPL2              | 4.16 | 5.05 | 3.55 |
| NFE4                | 4.16 | 4.59 | 3.70 |
| OTTHUMG000000162304 | 4.16 | 4.75 | 3.61 |

|                    |      |      |      |
|--------------------|------|------|------|
| OTTHUMG00000037610 | 4.16 | 4.94 | 3.42 |
| RSPO3              | 4.16 | 4.78 | 3.26 |
| MRPL49             | 4.16 | 4.72 | 3.47 |
| OR5F1              | 4.16 | 4.57 | 3.67 |
| NRIP3              | 4.16 | 4.58 | 3.70 |
| C4BPA              | 4.16 | 5.01 | 3.71 |
| MYH7B              | 4.16 | 4.52 | 3.64 |
| TTLL6              | 4.16 | 4.39 | 3.72 |
| MIR101-2           | 4.16 | 6.13 | 3.18 |
| PCK1               | 4.16 | 4.51 | 3.77 |
| OCA2               | 4.16 | 5.01 | 3.73 |
| LBX2               | 4.16 | 4.46 | 3.72 |
| PGC                | 4.16 | 4.61 | 3.89 |
| KCNK10             | 4.16 | 5.05 | 3.75 |
| IRX5               | 4.15 | 4.65 | 3.55 |
| GPR119             | 4.15 | 4.61 | 3.31 |
| CACNG6             | 4.15 | 4.44 | 3.85 |
| OTTHUMG00000058802 | 4.15 | 4.63 | 3.66 |
| TSPEAR             | 4.15 | 4.44 | 3.80 |
| DCAF11             | 4.15 | 4.49 | 3.69 |
| HPCAL4             | 4.15 | 4.64 | 3.80 |
| OTTHUMG00000169945 | 4.15 | 4.58 | 3.66 |
| FERMT3             | 4.15 | 4.41 | 3.92 |
| OSER1-AS1          | 4.15 | 4.40 | 4.01 |
| CFL1P1             | 4.15 | 4.98 | 3.55 |
| NAIF1              | 4.15 | 4.41 | 3.73 |
| OTTHUMG00000164252 | 4.15 | 4.75 | 3.82 |
| TMEM35             | 4.15 | 4.52 | 3.87 |
| OTTHUMG00000019251 | 4.15 | 4.75 | 3.71 |
| C19orf18           | 4.15 | 4.43 | 3.77 |
| SYT7               | 4.15 | 4.69 | 3.70 |
| OTTHUMG00000152023 | 4.15 | 5.10 | 3.59 |
| DEFB118            | 4.15 | 4.92 | 3.34 |
| KLHL40             | 4.15 | 4.51 | 3.68 |
| LOC221122          | 4.15 | 4.51 | 3.87 |
| RASGRP2            | 4.15 | 4.84 | 3.48 |
| SOX21              | 4.15 | 4.67 | 3.86 |
| ELF3               | 4.15 | 4.49 | 3.60 |
| CEACAM22P          | 4.15 | 4.63 | 3.76 |
| F2RL2              | 4.15 | 4.72 | 3.75 |
| LOC100616530       | 4.15 | 4.82 | 3.68 |
| OTTHUMG00000020204 | 4.15 | 4.56 | 3.88 |
| OR56B1             | 4.15 | 4.98 | 3.00 |
| OTTHUMG00000160102 | 4.15 | 4.49 | 3.74 |
| INHBE              | 4.15 | 4.42 | 3.88 |
| LOC285389          | 4.15 | 4.76 | 3.66 |
| OTTHUMG00000169123 | 4.15 | 4.62 | 3.95 |
| LOC100507079       | 4.15 | 4.62 | 3.61 |
| HCG4B              | 4.15 | 4.47 | 3.87 |

|                    |      |      |      |
|--------------------|------|------|------|
| GCNT2              | 4.15 | 4.52 | 3.68 |
| LOC221272          | 4.15 | 4.35 | 4.00 |
| LOC100129048       | 4.15 | 4.82 | 3.67 |
| OTTHUMG00000166132 | 4.15 | 4.53 | 3.59 |
| OR7D2              | 4.15 | 4.76 | 3.75 |
| AGXT2              | 4.15 | 4.53 | 3.77 |
| C17orf64           | 4.15 | 4.36 | 3.78 |
| EXD1               | 4.15 | 4.54 | 3.58 |
| CASP12             | 4.15 | 4.55 | 3.82 |
| PLAG1              | 4.15 | 4.74 | 3.88 |
| NKAIN4             | 4.15 | 4.68 | 3.52 |
| LOC100505904       | 4.15 | 4.69 | 3.76 |
| LINC00521          | 4.15 | 4.36 | 3.94 |
| DLEU7              | 4.15 | 4.58 | 3.60 |
| LOC400958          | 4.15 | 4.94 | 3.55 |
| LRRC18             | 4.15 | 4.68 | 3.42 |
| PPP2R2C            | 4.15 | 4.47 | 3.86 |
| LOC100129223       | 4.15 | 4.52 | 3.78 |
| MPP2               | 4.15 | 4.70 | 3.76 |
| MLN                | 4.15 | 4.59 | 3.65 |
| OTTHUMG00000086912 | 4.15 | 4.68 | 3.26 |
| NPY2R              | 4.15 | 4.41 | 3.93 |
| OTTHUMG00000020552 | 4.15 | 4.70 | 3.77 |
| OTTHUMG00000017531 | 4.15 | 4.64 | 3.59 |
| IDI2-AS1           | 4.15 | 4.52 | 3.64 |
| ARRDC5             | 4.15 | 4.62 | 3.62 |
| NETO2              | 4.15 | 4.69 | 3.65 |
| AK7                | 4.15 | 4.67 | 3.90 |
| SPATA31C2          | 4.15 | 4.61 | 3.85 |
| GLYCAM1            | 4.15 | 4.46 | 3.36 |
| ACOT6              | 4.15 | 4.60 | 3.78 |
| GNRHR              | 4.15 | 4.70 | 3.52 |
| SLC16A6            | 4.15 | 4.70 | 3.64 |
| LOC100130705       | 4.15 | 4.61 | 3.61 |
| OTTHUMG00000005710 | 4.15 | 4.64 | 3.73 |
| OTTHUMG00000165727 | 4.15 | 4.58 | 3.52 |
| AFAP1L2            | 4.15 | 4.70 | 3.75 |
| MYBPHL             | 4.15 | 4.66 | 3.80 |
| LHFPL3-AS2         | 4.15 | 4.66 | 3.73 |
| TTLL13             | 4.14 | 4.46 | 3.86 |
| OTTHUMG00000161606 | 4.14 | 4.77 | 3.74 |
| SLC25A5-AS1        | 4.14 | 4.59 | 3.72 |
| NPPA-AS1           | 4.14 | 4.64 | 3.50 |
| DPEP3              | 4.14 | 4.63 | 3.62 |
| FAM90A1            | 4.14 | 4.61 | 3.43 |
| OTTHUMG00000171354 | 4.14 | 4.40 | 3.65 |
| KIAA0319           | 4.14 | 4.53 | 3.62 |
| PHACTR3            | 4.14 | 4.47 | 3.81 |
| RRP7B              | 4.14 | 4.53 | 3.41 |

|                    |      |      |      |
|--------------------|------|------|------|
| LOC401242          | 4.14 | 4.58 | 3.91 |
| LOC100130992       | 4.14 | 4.63 | 3.72 |
| CXCL1              | 4.14 | 4.79 | 3.77 |
| AVPR1A             | 4.14 | 5.15 | 3.10 |
| USP32P2            | 4.14 | 5.48 | 3.13 |
| OTTHUMG00000024201 | 4.14 | 4.66 | 3.77 |
| LOC100506127       | 4.14 | 4.38 | 3.58 |
| MPO                | 4.14 | 4.77 | 3.69 |
| OTTHUMG00000151248 | 4.14 | 4.39 | 3.75 |
| TRIM43B            | 4.14 | 5.14 | 3.46 |
| NEUROD6            | 4.14 | 4.53 | 3.73 |
| GTSE1              | 4.14 | 4.71 | 3.76 |
| HAR1A              | 4.14 | 4.43 | 3.72 |
| MAD2L1             | 4.14 | 4.72 | 3.57 |
| WNT9B              | 4.14 | 4.36 | 3.86 |
| WDR93              | 4.14 | 4.43 | 3.62 |
| IGHV7-81           | 4.14 | 4.72 | 3.50 |
| STYK1              | 4.14 | 4.57 | 3.77 |
| CCKAR              | 4.14 | 4.58 | 3.54 |
| MAP4K1             | 4.14 | 4.31 | 3.92 |
| PPP1R17            | 4.14 | 4.83 | 3.14 |
| MIR603             | 4.14 | 4.70 | 3.55 |
| MIR545             | 4.14 | 4.94 | 3.56 |
| EMR4P              | 4.14 | 4.73 | 3.57 |
| CYP1A2             | 4.14 | 4.58 | 3.74 |
| NOD2               | 4.14 | 4.41 | 3.98 |
| OTTHUMG00000015714 | 4.14 | 5.11 | 3.09 |
| SLC22A7            | 4.14 | 4.38 | 3.89 |
| OTTHUMG00000163333 | 4.14 | 4.56 | 3.65 |
| C22orf42           | 4.14 | 4.72 | 3.63 |
| ZNF665             | 4.14 | 4.59 | 3.89 |
| FGF9               | 4.14 | 4.49 | 3.74 |
| CIB3               | 4.14 | 4.87 | 3.60 |
| SARM1              | 4.14 | 4.55 | 3.87 |
| ZNF878             | 4.14 | 4.92 | 3.81 |
| FTHL17             | 4.14 | 4.47 | 3.21 |
| LRRC48             | 4.14 | 4.42 | 3.84 |
| EPYC               | 4.14 | 4.92 | 3.61 |
| OTTHUMG00000012409 | 4.14 | 5.00 | 3.68 |
| STK16              | 4.14 | 4.58 | 3.16 |
| TXNDC9             | 4.14 | 4.52 | 3.50 |
| DEFB115            | 4.14 | 4.57 | 3.81 |
| ZNF563             | 4.14 | 4.58 | 3.62 |
| FOXN3-AS1          | 4.14 | 4.46 | 3.84 |
| ELMOD1             | 4.14 | 4.32 | 3.91 |
| OR1411             | 4.14 | 4.56 | 3.81 |
| KRBOX1-AS1         | 4.14 | 4.49 | 3.77 |
| TACR1              | 4.14 | 4.82 | 3.75 |
| RBMS3-AS1          | 4.14 | 4.59 | 3.92 |

|                    |      |      |      |
|--------------------|------|------|------|
| KRT8P11            | 4.14 | 4.87 | 3.51 |
| CDC25A             | 4.14 | 4.52 | 3.77 |
| DPH6-AS1           | 4.14 | 4.44 | 3.71 |
| HS3ST2             | 4.14 | 4.43 | 3.73 |
| KRTAP8-1           | 4.14 | 4.42 | 3.47 |
| SERAC1             | 4.14 | 4.40 | 3.75 |
| ZNF26              | 4.14 | 4.42 | 3.62 |
| SOCS1              | 4.14 | 4.66 | 3.58 |
| IQCF5              | 4.14 | 4.37 | 3.85 |
| LAMC2              | 4.13 | 4.53 | 3.94 |
| TMEM154            | 4.13 | 4.63 | 3.63 |
| OTTHUMG00000035264 | 4.13 | 4.55 | 3.53 |
| TPRXL              | 4.13 | 4.55 | 3.74 |
| PARP10             | 4.13 | 4.68 | 3.61 |
| SLC45A1            | 4.13 | 4.46 | 3.67 |
| GRIN2A             | 4.13 | 4.49 | 3.79 |
| SNORA75            | 4.13 | 5.11 | 3.10 |
| XKR6               | 4.13 | 4.57 | 3.63 |
| SYNPO2L            | 4.13 | 4.57 | 3.51 |
| CENPVP1            | 4.13 | 4.49 | 3.90 |
| BEX2               | 4.13 | 4.93 | 3.37 |
| ANKRD53            | 4.13 | 4.50 | 3.92 |
| LOC440900          | 4.13 | 4.83 | 3.69 |
| PIP5K1A            | 4.13 | 5.07 | 3.38 |
| HTR1F              | 4.13 | 4.75 | 3.62 |
| TSPAN5             | 4.13 | 4.44 | 3.76 |
| SPAG11B            | 4.13 | 4.76 | 3.67 |
| GLRA4              | 4.13 | 4.32 | 3.82 |
| DGAT2L6            | 4.13 | 4.32 | 3.83 |
| OTTHUMG00000150041 | 4.13 | 4.74 | 3.70 |
| FLJ36777           | 4.13 | 4.59 | 3.55 |
| TMEM143            | 4.13 | 4.42 | 3.55 |
| SPRR2F             | 4.13 | 5.04 | 2.87 |
| OTTHUMG00000167160 | 4.13 | 4.96 | 3.79 |
| ATP1A4             | 4.13 | 4.79 | 3.80 |
| OTTHUMG00000167183 | 4.13 | 4.69 | 3.69 |
| PCDH19             | 4.13 | 4.33 | 3.83 |
| HTR6               | 4.13 | 4.49 | 3.90 |
| OTTHUMG00000018782 | 4.13 | 4.35 | 3.81 |
| NME5               | 4.13 | 4.41 | 3.61 |
| FLJ42220           | 4.13 | 4.39 | 3.59 |
| LOC388942          | 4.13 | 4.76 | 3.67 |
| OR51F1             | 4.13 | 4.54 | 3.30 |
| CDH4               | 4.13 | 4.53 | 3.84 |
| MTVR2              | 4.13 | 4.59 | 3.46 |
| C6orf201           | 4.13 | 4.37 | 3.80 |
| RPL34-AS1          | 4.13 | 4.82 | 3.76 |
| IHH                | 4.13 | 4.57 | 3.49 |
| ZNF319             | 4.13 | 4.42 | 3.80 |

|                    |      |      |      |
|--------------------|------|------|------|
| DLX6-AS2           | 4.13 | 4.42 | 3.86 |
| ZNF664             | 4.13 | 4.51 | 3.68 |
| PLXNB3             | 4.13 | 4.40 | 3.84 |
| RGS9BP             | 4.13 | 4.66 | 3.75 |
| IL7R               | 4.13 | 4.47 | 3.50 |
| ASB2               | 4.13 | 4.61 | 3.77 |
| DPYD-AS1           | 4.13 | 4.73 | 3.89 |
| LINC00207          | 4.13 | 4.69 | 3.72 |
| PENK               | 4.13 | 4.55 | 3.73 |
| IL21R              | 4.13 | 4.61 | 3.83 |
| OR7E156P           | 4.13 | 4.60 | 3.47 |
| ZNF30              | 4.13 | 4.45 | 3.60 |
| HMGCLL1            | 4.13 | 4.51 | 3.78 |
| HAO2-IT1           | 4.13 | 5.07 | 3.67 |
| SLC22A5            | 4.13 | 4.49 | 3.76 |
| LOC340340          | 4.13 | 5.09 | 3.65 |
| CHRNA5             | 4.13 | 4.58 | 3.73 |
| KRT7               | 4.13 | 4.47 | 3.64 |
| RWDD2A             | 4.13 | 4.43 | 3.49 |
| HSP90AB2P          | 4.13 | 4.55 | 3.75 |
| SNORD78            | 4.13 | 4.86 | 2.39 |
| OTTHUMG00000166562 | 4.13 | 4.41 | 3.87 |
| MAGEA10            | 4.13 | 4.83 | 3.75 |
| C3orf22            | 4.13 | 4.34 | 3.92 |
| LOC100289098       | 4.13 | 4.55 | 3.62 |
| LOC100996634       | 4.13 | 4.55 | 3.60 |
| LOC349160          | 4.13 | 4.85 | 3.49 |
| LCE1E              | 4.13 | 4.68 | 3.30 |
| OLIG1              | 4.13 | 4.39 | 3.77 |
| OTTHUMG00000162042 | 4.13 | 4.87 | 3.45 |
| AGBL3              | 4.13 | 4.54 | 3.83 |
| LOC100505658       | 4.13 | 4.38 | 3.75 |
| FAM133A            | 4.13 | 5.17 | 3.20 |
| TICRR              | 4.13 | 4.59 | 3.64 |
| TNFRSF19           | 4.13 | 4.53 | 3.77 |
| OTTHUMG00000163189 | 4.13 | 4.54 | 3.64 |
| SCGB1C1            | 4.12 | 4.79 | 3.52 |
| LOC642236          | 4.12 | 4.72 | 3.16 |
| CCDC19             | 4.12 | 4.40 | 3.61 |
| LOC100506688       | 4.12 | 4.48 | 3.53 |
| TK1                | 4.12 | 4.64 | 3.54 |
| SIDT1              | 4.12 | 4.48 | 3.67 |
| CCL4               | 4.12 | 4.60 | 3.57 |
| OTTHUMG00000016828 | 4.12 | 4.42 | 3.67 |
| RTP1               | 4.12 | 4.46 | 3.83 |
| LOC100129858       | 4.12 | 4.81 | 3.57 |
| LOC728431          | 4.12 | 4.56 | 3.57 |
| BCAS4              | 4.12 | 4.73 | 3.57 |
| OTTHUMG00000153468 | 4.12 | 4.70 | 3.76 |

|                    |      |      |      |
|--------------------|------|------|------|
| CMPK2              | 4.12 | 4.79 | 3.51 |
| LOC340113          | 4.12 | 4.56 | 3.46 |
| OTTHUMG00000167549 | 4.12 | 4.66 | 3.75 |
| OR3A3              | 4.12 | 4.76 | 3.60 |
| INHBC              | 4.12 | 4.49 | 3.72 |
| MGC16275           | 4.12 | 4.49 | 3.64 |
| CCDC163P           | 4.12 | 5.07 | 3.64 |
| TCTE1              | 4.12 | 4.61 | 3.68 |
| DEFB119            | 4.12 | 4.80 | 3.77 |
| ZNF860             | 4.12 | 4.53 | 3.75 |
| RNA5SP309          | 4.12 | 5.01 | 3.37 |
| NBLA00301          | 4.12 | 4.43 | 3.61 |
| GPRC5D             | 4.12 | 4.71 | 3.71 |
| LOC100507554       | 4.12 | 4.64 | 3.67 |
| QPRT               | 4.12 | 4.69 | 3.35 |
| S100P              | 4.12 | 4.34 | 3.86 |
| HERC5              | 4.12 | 5.10 | 3.49 |
| ABCD1              | 4.12 | 4.32 | 3.87 |
| ACTN3              | 4.12 | 4.85 | 3.74 |
| LINC00372          | 4.12 | 4.79 | 3.57 |
| S100A5             | 4.12 | 4.63 | 3.71 |
| ACRV1              | 4.12 | 4.38 | 3.86 |
| PRKCG              | 4.12 | 4.44 | 3.69 |
| PTPRT              | 4.12 | 4.61 | 3.54 |
| KDM4D              | 4.12 | 4.46 | 3.48 |
| CLVS1              | 4.12 | 4.36 | 3.84 |
| ERVMER34-1         | 4.12 | 4.63 | 3.58 |
| ZNF578             | 4.12 | 5.31 | 3.38 |
| C5orf63            | 4.12 | 4.46 | 3.79 |
| CD22               | 4.12 | 4.39 | 3.86 |
| SLC37A1            | 4.12 | 4.71 | 3.64 |
| FAM86B3P           | 4.12 | 4.49 | 3.54 |
| LOC100505853       | 4.12 | 4.86 | 3.42 |
| ANKRD55            | 4.12 | 4.53 | 3.63 |
| PGLYRP4            | 4.12 | 4.52 | 3.54 |
| ARAP1-AS2          | 4.12 | 4.55 | 3.54 |
| CYP1B1-AS1         | 4.12 | 4.65 | 3.55 |
| C10orf129          | 4.12 | 4.64 | 3.81 |
| LOC100507384       | 4.12 | 4.55 | 3.54 |
| ANKRD6             | 4.12 | 4.34 | 3.73 |
| CYB561             | 4.12 | 4.60 | 3.79 |
| ASB12              | 4.12 | 4.65 | 3.67 |
| LOC116437          | 4.12 | 4.53 | 3.77 |
| TSPAN10            | 4.12 | 4.66 | 3.54 |
| CHAC2              | 4.12 | 4.64 | 3.65 |
| NAP1L6             | 4.12 | 4.98 | 3.49 |
| F2RL1              | 4.12 | 4.69 | 3.88 |
| DSCR10             | 4.12 | 4.46 | 3.84 |
| FAHD2B             | 4.11 | 4.53 | 3.40 |

|                    |      |      |      |
|--------------------|------|------|------|
| C20orf85           | 4.11 | 4.34 | 3.79 |
| OTTHUMG00000164347 | 4.11 | 4.67 | 3.68 |
| EPHA5              | 4.11 | 4.39 | 3.71 |
| CYTIP              | 4.11 | 5.19 | 3.70 |
| TINCR              | 4.11 | 4.93 | 3.24 |
| CSTL1              | 4.11 | 4.51 | 3.87 |
| UNC5D              | 4.11 | 4.54 | 3.82 |
| C3orf49            | 4.11 | 4.53 | 3.77 |
| XKR5               | 4.11 | 4.56 | 3.65 |
| MIR4778            | 4.11 | 4.81 | 3.40 |
| FAM66B             | 4.11 | 4.86 | 3.31 |
| BIRC5              | 4.11 | 4.43 | 3.55 |
| SMIM6              | 4.11 | 4.49 | 3.54 |
| AOC4               | 4.11 | 4.97 | 3.51 |
| OTTHUMG00000154794 | 4.11 | 4.55 | 3.68 |
| WTAPP1             | 4.11 | 5.17 | 3.37 |
| MAST4-AS1          | 4.11 | 4.67 | 3.52 |
| CDH15              | 4.11 | 4.71 | 3.76 |
| FAM65B             | 4.11 | 4.45 | 3.86 |
| REPS2              | 4.11 | 5.00 | 3.26 |
| OTTHUMG00000014290 | 4.11 | 4.49 | 3.90 |
| FIGNL2             | 4.11 | 4.69 | 3.81 |
| TAL2               | 4.11 | 4.86 | 3.77 |
| TRAV2              | 4.11 | 4.62 | 3.65 |
| C12orf60           | 4.11 | 4.60 | 3.86 |
| OVOL1              | 4.11 | 4.53 | 3.43 |
| LOC283387          | 4.11 | 4.96 | 3.46 |
| LINC00633          | 4.11 | 4.97 | 3.27 |
| H2BFXP             | 4.11 | 4.75 | 3.27 |
| C17orf58           | 4.11 | 4.70 | 3.71 |
| MDS2               | 4.11 | 4.56 | 3.66 |
| UNC5B-AS1          | 4.11 | 4.83 | 3.67 |
| CT62               | 4.11 | 4.51 | 3.73 |
| FUT7               | 4.11 | 4.55 | 3.78 |
| ZNF32-AS3          | 4.11 | 4.49 | 3.67 |
| LOC284009          | 4.11 | 4.56 | 3.47 |
| IL7                | 4.11 | 4.53 | 3.24 |
| SLC9A7P1           | 4.11 | 4.87 | 3.21 |
| RIPK4              | 4.11 | 4.41 | 3.75 |
| ANKRD34C           | 4.11 | 4.55 | 3.53 |
| CAPN9              | 4.11 | 4.46 | 3.73 |
| MIR140             | 4.11 | 5.16 | 3.30 |
| NDC80              | 4.11 | 4.97 | 3.47 |
| POU3F1             | 4.11 | 4.54 | 3.62 |
| CELF4              | 4.11 | 4.62 | 3.57 |
| FOXQ1              | 4.11 | 4.63 | 3.78 |
| TUBB1              | 4.11 | 4.68 | 3.46 |
| SEZ6L              | 4.11 | 4.75 | 3.84 |
| OTTHUMG00000169825 | 4.11 | 4.88 | 3.36 |



|                    |      |      |      |
|--------------------|------|------|------|
| CNTN4-AS1          | 4.11 | 4.64 | 3.62 |
| TRPM6              | 4.11 | 4.35 | 3.72 |
| NLRP8              | 4.11 | 4.55 | 3.74 |
| LOC388906          | 4.11 | 4.62 | 3.70 |
| ACCSL              | 4.11 | 4.63 | 3.78 |
| BEST3              | 4.11 | 4.34 | 3.85 |
| OTTHUMG00000157190 | 4.11 | 4.48 | 3.82 |
| SULT1C3            | 4.11 | 4.44 | 3.70 |
| EYA4               | 4.11 | 4.68 | 3.56 |
| RHAG               | 4.11 | 4.34 | 3.66 |
| OTTHUMG00000164157 | 4.11 | 4.72 | 3.59 |
| SLC25A15           | 4.11 | 4.58 | 3.37 |
| MYO7B              | 4.11 | 4.52 | 3.79 |
| GLT1D1             | 4.11 | 4.46 | 3.80 |
| FOXC2              | 4.11 | 4.50 | 3.82 |
| CYP4X1             | 4.11 | 5.03 | 3.27 |
| ABCB1              | 4.10 | 4.64 | 3.59 |
| PPP1R14C           | 4.10 | 5.38 | 3.25 |
| LOC93622           | 4.10 | 4.54 | 3.54 |
| CCDC175            | 4.10 | 4.40 | 3.70 |
| TAS2R41            | 4.10 | 4.76 | 3.86 |
| OTTHUMG00000150809 | 4.10 | 4.45 | 3.78 |
| NRG2               | 4.10 | 4.59 | 3.86 |
| OTTHUMG00000002945 | 4.10 | 5.25 | 2.66 |
| OR6P1              | 4.10 | 4.86 | 3.29 |
| FCRLB              | 4.10 | 4.56 | 3.67 |
| DRGX               | 4.10 | 4.39 | 3.83 |
| CCDC27             | 4.10 | 4.43 | 3.77 |
| PPARA              | 4.10 | 4.48 | 3.95 |
| CD300LB            | 4.10 | 4.65 | 3.58 |
| PITPNM3            | 4.10 | 4.38 | 3.67 |
| PRSS46             | 4.10 | 4.66 | 3.68 |
| OTTHUMG00000163062 | 4.10 | 4.63 | 3.57 |
| AWAT1              | 4.10 | 4.55 | 3.62 |
| FLJ27243           | 4.10 | 4.51 | 3.51 |
| LOC100506465       | 4.10 | 4.54 | 3.74 |
| OTTHUMG00000167377 | 4.10 | 4.56 | 3.75 |
| RPRM               | 4.10 | 4.51 | 3.73 |
| OTTHUMG00000017897 | 4.10 | 4.77 | 3.73 |
| CRYBB1             | 4.10 | 4.43 | 3.64 |
| HDX                | 4.10 | 4.40 | 3.71 |
| RUVBL1-AS1         | 4.10 | 4.80 | 3.56 |
| OTTHUMG00000014230 | 4.10 | 4.51 | 3.58 |
| ITGB1BP2           | 4.10 | 4.23 | 3.88 |
| OTTHUMG00000156062 | 4.10 | 4.39 | 3.61 |
| GRM3               | 4.10 | 4.45 | 3.81 |
| RNF138P1           | 4.10 | 4.50 | 3.62 |
| OTTHUMG00000170826 | 4.10 | 4.62 | 3.77 |
| TMEM144            | 4.10 | 4.57 | 3.56 |

|                    |      |      |      |
|--------------------|------|------|------|
| OTTHUMG00000165747 | 4.10 | 4.61 | 3.52 |
| TXLNB              | 4.10 | 4.69 | 3.49 |
| NLRP7              | 4.10 | 4.39 | 3.72 |
| ZIC4-AS1           | 4.10 | 5.00 | 3.59 |
| C20orf96           | 4.10 | 4.40 | 3.53 |
| SPATS1             | 4.10 | 4.43 | 3.71 |
| OTTHUMG00000154727 | 4.10 | 4.58 | 3.60 |
| FIGN               | 4.10 | 4.56 | 3.55 |
| PDZK1              | 4.10 | 4.73 | 3.33 |
| LINC00534          | 4.10 | 4.74 | 3.67 |
| SLC16A9            | 4.10 | 4.38 | 3.81 |
| WDR4               | 4.10 | 4.45 | 3.56 |
| LOC84931           | 4.10 | 4.41 | 3.87 |
| TEX41              | 4.10 | 4.54 | 3.79 |
| LOC339166          | 4.10 | 4.51 | 3.72 |
| PGLYRP2            | 4.10 | 4.52 | 3.75 |
| PDHA2              | 4.10 | 4.65 | 3.65 |
| PLA2G4E            | 4.10 | 4.55 | 3.66 |
| TRIP13             | 4.10 | 4.34 | 3.91 |
| ERVV-1             | 4.10 | 4.61 | 3.76 |
| XKR4               | 4.10 | 4.62 | 3.61 |
| LOC341056          | 4.10 | 4.66 | 3.68 |
| SEMA4D             | 4.10 | 4.38 | 3.71 |
| MTHFD2L            | 4.10 | 4.70 | 3.67 |
| ISPD               | 4.10 | 4.63 | 3.74 |
| YPEL5              | 4.10 | 4.43 | 3.65 |
| OTTHUMG00000164413 | 4.10 | 4.97 | 3.70 |
| OTTHUMG00000018022 | 4.10 | 4.57 | 3.63 |
| KRTAP15-1          | 4.10 | 5.02 | 3.32 |
| DYRK3              | 4.10 | 4.80 | 3.59 |
| STX1B              | 4.10 | 4.52 | 3.77 |
| ANKRD18CP          | 4.10 | 4.50 | 3.68 |
| CCDC166            | 4.10 | 4.41 | 3.91 |
| LOC340178          | 4.10 | 5.22 | 3.46 |
| OTTHUMG00000167947 | 4.10 | 4.40 | 3.82 |
| GRHL2              | 4.10 | 4.47 | 3.80 |
| LOC100134259       | 4.10 | 4.88 | 3.41 |
| LOC100505774       | 4.10 | 5.01 | 3.38 |
| LINC00284          | 4.10 | 4.85 | 2.96 |
| EHHADH-AS1         | 4.10 | 4.52 | 3.66 |
| ZNF833P            | 4.10 | 4.65 | 3.55 |
| TFF1               | 4.10 | 4.53 | 3.57 |
| LOC731223          | 4.09 | 4.49 | 3.61 |
| LHX9               | 4.09 | 4.48 | 3.71 |
| PNCK               | 4.09 | 4.47 | 3.65 |
| ZDHHC23            | 4.09 | 4.57 | 3.78 |
| OTTHUMG00000155311 | 4.09 | 4.50 | 3.26 |
| ABLIM2             | 4.09 | 4.68 | 3.77 |
| LRRC3B             | 4.09 | 4.43 | 3.80 |

|                    |      |      |      |
|--------------------|------|------|------|
| LOC400128          | 4.09 | 4.33 | 3.84 |
| OTTHUMG00000000412 | 4.09 | 4.87 | 3.68 |
| OTTHUMG00000165950 | 4.09 | 4.80 | 3.57 |
| OTTHUMG00000019258 | 4.09 | 4.71 | 3.64 |
| LOC149134          | 4.09 | 4.53 | 3.48 |
| LOC101060244       | 4.09 | 4.50 | 3.50 |
| OTTHUMG00000032152 | 4.09 | 4.68 | 3.57 |
| ASCL4              | 4.09 | 4.37 | 3.75 |
| C15orf60           | 4.09 | 4.26 | 3.74 |
| FAM5B              | 4.09 | 4.41 | 3.73 |
| PRSS27             | 4.09 | 4.50 | 3.54 |
| OTTHUMG00000156146 | 4.09 | 4.51 | 3.78 |
| KDM4B              | 4.09 | 4.62 | 3.43 |
| IGFBPL1            | 4.09 | 4.45 | 3.68 |
| NME9               | 4.09 | 4.50 | 3.76 |
| C3orf72            | 4.09 | 4.47 | 3.86 |
| SIRPD              | 4.09 | 4.47 | 3.60 |
| DLK1               | 4.09 | 4.46 | 3.70 |
| FAM19A5            | 4.09 | 4.39 | 3.61 |
| DUSP4              | 4.09 | 4.59 | 3.51 |
| OTTHUMG00000037358 | 4.09 | 4.43 | 3.67 |
| PRKXP1             | 4.09 | 4.65 | 3.33 |
| MYPN               | 4.09 | 4.46 | 3.68 |
| LINC00501          | 4.09 | 4.75 | 3.23 |
| POP1               | 4.09 | 4.37 | 3.73 |
| MUSK               | 4.09 | 4.26 | 3.87 |
| OR13A1             | 4.09 | 4.81 | 3.76 |
| FOXI3              | 4.09 | 4.39 | 3.66 |
| TNFAIP8            | 4.09 | 4.56 | 3.76 |
| SLC46A2            | 4.09 | 4.68 | 3.82 |
| BCL2A1             | 4.09 | 4.40 | 3.79 |
| CD3D               | 4.09 | 4.96 | 3.33 |
| SEL1L2             | 4.09 | 4.45 | 3.75 |
| OTTHUMG00000017337 | 4.09 | 4.45 | 3.58 |
| ITGB5-AS1          | 4.09 | 4.85 | 2.82 |
| HIF1A-AS1          | 4.09 | 4.43 | 3.81 |
| FSHB               | 4.09 | 4.66 | 3.73 |
| LOC255167          | 4.09 | 4.56 | 3.83 |
| OTTHUMG00000000565 | 4.09 | 4.35 | 3.43 |
| MIR362             | 4.09 | 4.60 | 3.56 |
| OTTHUMG00000171984 | 4.09 | 4.63 | 3.19 |
| MORC1              | 4.09 | 4.66 | 3.11 |
| LINC00114          | 4.09 | 4.28 | 3.78 |
| ARRDC3-AS1         | 4.09 | 4.31 | 3.86 |
| CFL1               | 4.09 | 4.36 | 3.73 |
| OTTHUMG00000172491 | 4.09 | 4.45 | 3.37 |
| OTTHUMG00000164862 | 4.09 | 4.55 | 3.71 |
| C19orf81           | 4.09 | 4.47 | 3.32 |
| OTTHUMG00000168813 | 4.09 | 4.75 | 3.36 |

|                    |      |      |      |
|--------------------|------|------|------|
| HEY1               | 4.09 | 4.75 | 3.00 |
| NOX5               | 4.09 | 4.32 | 3.91 |
| RNASEH2B-AS1       | 4.09 | 4.58 | 3.69 |
| OTTHUMG00000171471 | 4.09 | 4.52 | 3.53 |
| THAP7-AS1          | 4.09 | 4.83 | 3.77 |
| FAM170B-AS1        | 4.09 | 4.55 | 3.72 |
| EFCAB10            | 4.09 | 4.60 | 3.67 |
| FBN2               | 4.09 | 4.58 | 3.81 |
| LINC00620          | 4.08 | 4.61 | 3.21 |
| DNAH7              | 4.08 | 4.34 | 3.78 |
| MIR500A            | 4.08 | 4.54 | 3.43 |
| OTTHUMG00000155178 | 4.08 | 4.82 | 3.60 |
| CAPN8              | 4.08 | 4.33 | 3.66 |
| OTTHUMG00000165902 | 4.08 | 4.93 | 3.23 |
| GABRB2             | 4.08 | 4.45 | 3.67 |
| GSX1               | 4.08 | 4.38 | 3.83 |
| FA2H               | 4.08 | 4.35 | 3.69 |
| OTTHUMG00000171829 | 4.08 | 5.20 | 3.23 |
| LOC646268          | 4.08 | 4.73 | 3.54 |
| OTX1               | 4.08 | 4.33 | 3.88 |
| LOC100996425       | 4.08 | 4.50 | 3.65 |
| OR5B12             | 4.08 | 4.44 | 3.80 |
| CDC42EP3           | 4.08 | 4.79 | 3.73 |
| TSPAN1             | 4.08 | 4.72 | 3.18 |
| OTTHUMG00000021104 | 4.08 | 4.82 | 3.33 |
| OR1A1              | 4.08 | 4.77 | 3.61 |
| MIR195             | 4.08 | 4.68 | 3.59 |
| SHANK2-AS2         | 4.08 | 4.54 | 3.72 |
| RAPGEFL1           | 4.08 | 4.29 | 3.66 |
| FAM187B            | 4.08 | 4.67 | 3.69 |
| TLX3               | 4.08 | 4.52 | 3.76 |
| OLR1               | 4.08 | 5.85 | 3.65 |
| MRPL23             | 4.08 | 4.44 | 3.72 |
| OTTHUMG00000166356 | 4.08 | 4.53 | 3.47 |
| MIR4436A           | 4.08 | 4.94 | 3.22 |
| OTTHUMG00000162001 | 4.08 | 5.00 | 3.40 |
| PTTG1              | 4.08 | 4.68 | 3.71 |
| LINC00210          | 4.08 | 4.38 | 3.52 |
| SNORA74A           | 4.08 | 4.52 | 3.74 |
| CCL3               | 4.08 | 4.38 | 3.43 |
| C12orf39           | 4.08 | 4.48 | 3.70 |
| LOC284930          | 4.08 | 4.63 | 3.54 |
| DNAH6              | 4.08 | 4.43 | 3.71 |
| MGC16025           | 4.08 | 4.44 | 3.22 |
| LOC441204          | 4.08 | 4.48 | 3.77 |
| PAGE1              | 4.08 | 4.43 | 3.64 |
| OTTHUMG00000074319 | 4.08 | 4.67 | 3.77 |
| ACSBG2             | 4.08 | 4.69 | 3.49 |
| TMEM150C           | 4.08 | 4.33 | 3.61 |

|                    |      |      |      |
|--------------------|------|------|------|
| TFAP2A             | 4.08 | 4.35 | 3.77 |
| LINC00943          | 4.08 | 4.62 | 3.72 |
| OTTHUMG00000165840 | 4.08 | 4.50 | 3.69 |
| CCL17              | 4.08 | 4.78 | 3.66 |
| MAP7D2             | 4.08 | 4.35 | 3.66 |
| RBM47              | 4.08 | 4.74 | 3.68 |
| AANAT              | 4.08 | 4.36 | 3.56 |
| CLEC4C             | 4.08 | 4.40 | 3.55 |
| LOC101060717       | 4.08 | 4.50 | 3.70 |
| OTTHUMG00000161607 | 4.08 | 4.52 | 3.83 |
| APOL3              | 4.08 | 4.45 | 3.57 |
| NALCN-AS1          | 4.08 | 4.72 | 3.34 |
| OTTHUMG00000020352 | 4.08 | 4.83 | 3.68 |
| MS4A12             | 4.08 | 4.42 | 3.82 |
| LOC100131060       | 4.07 | 4.42 | 3.71 |
| FAM71F2            | 4.07 | 4.39 | 3.87 |
| CROT               | 4.07 | 4.52 | 3.68 |
| MIR4458            | 4.07 | 4.33 | 3.86 |
| RAD51              | 4.07 | 4.51 | 3.51 |
| OTTHUMG00000003326 | 4.07 | 4.54 | 3.57 |
| PIN4P1             | 4.07 | 4.49 | 3.66 |
| FOXG1              | 4.07 | 4.38 | 3.52 |
| BOLL               | 4.07 | 4.26 | 3.80 |
| RAB40C             | 4.07 | 4.37 | 3.80 |
| LOC100506473       | 4.07 | 4.41 | 3.79 |
| OTTHUMG00000179151 | 4.07 | 4.41 | 3.35 |
| TUBA3FP            | 4.07 | 4.48 | 3.45 |
| HIST1H2AM          | 4.07 | 5.47 | 2.59 |
| LOC219690          | 4.07 | 4.27 | 3.74 |
| PTPN20A            | 4.07 | 4.79 | 3.40 |
| PRG3               | 4.07 | 4.33 | 3.72 |
| ALOX15B            | 4.07 | 4.42 | 3.83 |
| TMEM254            | 4.07 | 4.76 | 3.57 |
| CDK15              | 4.07 | 4.72 | 3.62 |
| SLC25A33           | 4.07 | 4.48 | 3.78 |
| OTTHUMG00000046176 | 4.07 | 4.45 | 3.77 |
| TTY21              | 4.07 | 4.60 | 3.57 |
| TMCO2              | 4.07 | 4.44 | 3.70 |
| HLA-DOB            | 4.07 | 4.51 | 3.74 |
| FBXL19-AS1         | 4.07 | 4.36 | 3.49 |
| TRIM73             | 4.07 | 4.35 | 3.73 |
| LOC392364          | 4.07 | 4.91 | 2.83 |
| TMEM217            | 4.07 | 4.82 | 3.59 |
| CEACAM16           | 4.07 | 4.81 | 3.01 |
| ENOX1-AS1          | 4.07 | 4.68 | 3.67 |
| RRM2B              | 4.07 | 4.78 | 3.21 |
| OTTHUMG00000154787 | 4.07 | 4.42 | 3.51 |
| OTTHUMG00000169332 | 4.07 | 4.67 | 3.26 |
| HOXA6              | 4.07 | 4.50 | 3.28 |

|                     |      |      |      |
|---------------------|------|------|------|
| KIAA1804            | 4.07 | 4.78 | 3.44 |
| ABCA4               | 4.07 | 4.45 | 3.66 |
| PPP1R26             | 4.07 | 4.57 | 3.55 |
| DPH2                | 4.07 | 4.25 | 3.82 |
| OTTHUMG00000018923  | 4.07 | 4.57 | 3.60 |
| PRSS54              | 4.07 | 4.44 | 3.66 |
| FOX11               | 4.07 | 4.64 | 3.69 |
| OR51E2              | 4.07 | 4.47 | 3.56 |
| DLL4                | 4.07 | 4.74 | 3.54 |
| PCDHB13             | 4.07 | 5.20 | 2.78 |
| IL36B               | 4.07 | 4.62 | 3.57 |
| S100A7A             | 4.07 | 4.25 | 3.82 |
| OTTHUMG000000150003 | 4.07 | 4.51 | 3.75 |
| OTTHUMG00000017626  | 4.07 | 4.68 | 3.64 |
| OTTHUMG00000017334  | 4.07 | 4.72 | 3.87 |
| IGFN1               | 4.07 | 4.50 | 3.82 |
| TIMM44              | 4.07 | 4.43 | 3.28 |
| LOC100130264        | 4.07 | 4.45 | 3.82 |
| XKRX                | 4.07 | 4.66 | 3.72 |
| ACVR2B-AS1          | 4.07 | 4.39 | 3.79 |
| OTTHUMG000000168899 | 4.07 | 4.60 | 3.50 |
| LOC101060038        | 4.07 | 4.60 | 3.61 |
| OTTHUMG000000020009 | 4.07 | 4.92 | 3.40 |
| LOC339666           | 4.07 | 4.33 | 3.68 |
| CACNA1G             | 4.07 | 4.56 | 3.63 |
| OTTHUMG000000159760 | 4.07 | 4.31 | 3.83 |
| OTTHUMG000000168744 | 4.07 | 4.45 | 3.57 |
| SIGLEC8             | 4.07 | 4.45 | 3.54 |
| HOXA-AS3            | 4.07 | 4.55 | 3.64 |
| OTTHUMG000000041137 | 4.07 | 4.36 | 3.84 |
| SYDE2               | 4.07 | 4.64 | 3.62 |
| ANO1-AS2            | 4.07 | 4.52 | 3.43 |
| MGC15885            | 4.06 | 4.45 | 3.66 |
| IYD                 | 4.06 | 4.26 | 3.60 |
| IGLV3-32            | 4.06 | 4.58 | 3.75 |
| OR10K1              | 4.06 | 4.69 | 3.57 |
| CNNM1               | 4.06 | 4.46 | 3.69 |
| CNBD2               | 4.06 | 4.68 | 3.61 |
| LINC00479           | 4.06 | 4.69 | 3.73 |
| OTTHUMG000000037400 | 4.06 | 4.78 | 3.47 |
| SOWAHD              | 4.06 | 4.57 | 3.75 |
| CRHBP               | 4.06 | 4.81 | 3.51 |
| PKP2                | 4.06 | 4.44 | 3.73 |
| FAM183B             | 4.06 | 4.33 | 3.69 |
| OTTHUMG000000169893 | 4.06 | 4.50 | 3.66 |
| DPP6                | 4.06 | 4.57 | 3.64 |
| LCE3C               | 4.06 | 4.50 | 3.59 |
| SNORA70D            | 4.06 | 4.52 | 3.48 |
| SGPP2               | 4.06 | 4.31 | 3.81 |

|                    |      |      |      |
|--------------------|------|------|------|
| LRRC4C             | 4.06 | 4.61 | 3.56 |
| GRIN2B             | 4.06 | 4.47 | 3.65 |
| ACER1              | 4.06 | 4.44 | 3.66 |
| GRK7               | 4.06 | 4.75 | 3.58 |
| GPR143             | 4.06 | 4.48 | 3.75 |
| LOC100506791       | 4.06 | 4.45 | 3.59 |
| DCAF12L1           | 4.06 | 4.53 | 3.66 |
| SDS                | 4.06 | 4.68 | 3.58 |
| EFCAB8             | 4.06 | 4.66 | 3.81 |
| GIPC2              | 4.06 | 4.57 | 3.41 |
| CNGA3              | 4.06 | 4.34 | 3.80 |
| SLC25A25           | 4.06 | 4.44 | 3.55 |
| RGS7BP             | 4.06 | 4.70 | 3.60 |
| HAO2               | 4.06 | 4.70 | 3.52 |
| LTB                | 4.06 | 5.28 | 3.53 |
| SLC18A1            | 4.06 | 4.27 | 3.71 |
| L1CAM              | 4.06 | 4.47 | 3.64 |
| OTUD6A             | 4.06 | 4.39 | 3.76 |
| SPATA31D5P         | 4.06 | 4.75 | 3.34 |
| SLC15A1            | 4.06 | 4.64 | 3.56 |
| TXNDC16            | 4.06 | 4.70 | 3.65 |
| FIBCD1             | 4.06 | 4.35 | 3.64 |
| TSSC1              | 4.06 | 4.33 | 3.61 |
| OTTHUMG00000151793 | 4.06 | 4.27 | 3.82 |
| MPV17L             | 4.06 | 4.60 | 3.21 |
| CBLN1              | 4.06 | 4.35 | 3.79 |
| LRRC55             | 4.06 | 4.65 | 3.58 |
| ANKK1              | 4.06 | 4.33 | 3.68 |
| SLC5A4             | 4.06 | 4.33 | 3.76 |
| GVINP1             | 4.06 | 4.53 | 3.47 |
| CA5A               | 4.06 | 4.58 | 3.44 |
| CEACAM18           | 4.06 | 4.48 | 3.88 |
| FCER2              | 4.06 | 4.67 | 3.73 |
| OTTHUMG00000163993 | 4.06 | 4.92 | 2.97 |
| DNER               | 4.06 | 4.59 | 3.61 |
| RNF182             | 4.06 | 4.80 | 3.68 |
| OR4D9              | 4.06 | 4.71 | 3.53 |
| NXT2               | 4.06 | 4.36 | 3.61 |
| OTTHUMG00000171503 | 4.06 | 4.59 | 3.76 |
| LOC283710          | 4.06 | 4.68 | 3.65 |
| C12orf71           | 4.06 | 4.67 | 3.65 |
| CYP4F30P           | 4.06 | 5.21 | 3.40 |
| LINC00299          | 4.06 | 4.66 | 3.71 |
| UPK3B              | 4.06 | 4.62 | 3.77 |
| FMO6P              | 4.06 | 4.67 | 3.68 |
| ABCG5              | 4.06 | 4.38 | 3.76 |
| EID2               | 4.06 | 4.54 | 3.69 |
| LOC283403          | 4.06 | 4.63 | 3.55 |
| OTTHUMG00000160281 | 4.06 | 4.98 | 3.40 |

|                    |      |      |      |
|--------------------|------|------|------|
| DEFB105B           | 4.06 | 4.37 | 3.54 |
| MUCL1              | 4.06 | 4.37 | 3.69 |
| MED18              | 4.06 | 4.72 | 3.68 |
| SPATC1L            | 4.06 | 4.40 | 3.41 |
| MIR4446            | 4.06 | 4.45 | 3.71 |
| LOC100507150       | 4.06 | 4.47 | 3.80 |
| ARHGAP26-IT1       | 4.06 | 4.79 | 3.25 |
| LCT                | 4.06 | 4.43 | 3.68 |
| PP13004            | 4.06 | 4.33 | 3.41 |
| LCN8               | 4.06 | 4.72 | 3.66 |
| TFDP3              | 4.06 | 4.66 | 3.68 |
| MASP1              | 4.05 | 4.46 | 3.50 |
| EN1                | 4.05 | 4.41 | 3.63 |
| VSTM5              | 4.05 | 4.72 | 3.75 |
| ZNF488             | 4.05 | 4.52 | 3.74 |
| MIR204             | 4.05 | 5.11 | 3.42 |
| KIAA1656           | 4.05 | 4.64 | 3.64 |
| TTY17A             | 4.05 | 4.83 | 3.28 |
| CDIPT-AS1          | 4.05 | 4.48 | 3.73 |
| C11orf16           | 4.05 | 4.49 | 3.38 |
| OTTHUMG00000153300 | 4.05 | 4.57 | 3.35 |
| NR6A1              | 4.05 | 4.56 | 3.15 |
| TFAP2D             | 4.05 | 4.48 | 3.58 |
| MAG                | 4.05 | 4.76 | 3.41 |
| SLC17A2            | 4.05 | 4.44 | 3.53 |
| LINC00707          | 4.05 | 4.41 | 3.54 |
| DUSP9              | 4.05 | 4.76 | 3.57 |
| EDN2               | 4.05 | 4.37 | 3.54 |
| ESYT3              | 4.05 | 4.25 | 3.59 |
| RNA5SP520          | 4.05 | 4.79 | 3.47 |
| AP1S2              | 4.05 | 4.79 | 3.48 |
| LOC149950          | 4.05 | 4.56 | 3.68 |
| OTTHUMG00000020544 | 4.05 | 4.37 | 3.63 |
| LOC100288524       | 4.05 | 4.62 | 3.50 |
| OTTHUMG00000154542 | 4.05 | 4.54 | 3.66 |
| YIPF7              | 4.05 | 4.29 | 3.73 |
| OTTHUMG00000020885 | 4.05 | 4.58 | 3.36 |
| OTTHUMG00000164480 | 4.05 | 4.47 | 3.43 |
| NKX2-2-AS1         | 4.05 | 4.41 | 3.69 |
| OTTHUMG00000177663 | 4.05 | 4.54 | 3.26 |
| LOC100130348       | 4.05 | 4.46 | 3.75 |
| LOC729815          | 4.05 | 5.10 | 3.24 |
| OTTHUMG00000166836 | 4.05 | 4.89 | 3.27 |
| TNR                | 4.05 | 4.34 | 3.69 |
| MSTN               | 4.05 | 5.54 | 3.19 |
| CPA4               | 4.05 | 4.31 | 3.70 |
| LOC100506178       | 4.05 | 4.50 | 3.65 |
| LINC00320          | 4.05 | 4.65 | 3.50 |
| PIN4               | 4.05 | 4.49 | 3.59 |



|                    |      |      |      |
|--------------------|------|------|------|
| METTL7B            | 4.05 | 4.42 | 3.32 |
| RTP2               | 4.05 | 4.46 | 3.52 |
| LOC100128822       | 4.05 | 4.63 | 3.61 |
| ZNF815P            | 4.05 | 4.52 | 3.70 |
| ENPP3              | 4.05 | 4.35 | 3.63 |
| OTTHUMG00000169978 | 4.05 | 4.59 | 3.73 |
| OTTHUMG00000169468 | 4.05 | 4.61 | 3.62 |
| HOXB13             | 4.05 | 4.52 | 3.48 |
| KLK15              | 4.05 | 4.79 | 3.74 |
| OTTHUMG00000015931 | 4.05 | 4.84 | 3.79 |
| DPYD-AS2           | 4.05 | 4.50 | 3.89 |
| OTTHUMG00000163754 | 4.05 | 4.72 | 3.20 |
| EID2B              | 4.05 | 4.50 | 3.74 |
| GBP1P1             | 4.05 | 4.62 | 3.81 |
| DEFB113            | 4.05 | 4.53 | 3.64 |
| SNAP25             | 4.05 | 4.99 | 3.28 |
| OXCT2              | 4.05 | 4.44 | 3.64 |
| OR10H1             | 4.05 | 4.79 | 3.57 |
| SSTR1              | 4.05 | 4.44 | 3.74 |
| LOC389906          | 4.05 | 4.64 | 3.57 |
| WNT8B              | 4.05 | 4.33 | 3.73 |
| MIR1537            | 4.05 | 5.04 | 3.43 |
| EGFEM1P            | 4.05 | 4.72 | 3.38 |
| EPS8L1             | 4.05 | 4.25 | 3.77 |
| FMO3               | 4.05 | 4.40 | 3.55 |
| OTTHUMG00000168913 | 4.05 | 4.40 | 3.57 |
| PPY2               | 4.05 | 4.40 | 3.57 |
| NLRP13             | 4.04 | 4.45 | 3.74 |
| VWA5B1             | 4.04 | 4.43 | 3.85 |
| C5orf46            | 4.04 | 4.36 | 3.68 |
| LOC100506253       | 4.04 | 4.32 | 3.56 |
| EML6               | 4.04 | 4.39 | 3.69 |
| PIWIL3             | 4.04 | 4.35 | 3.73 |
| OTTHUMG00000168583 | 4.04 | 4.61 | 3.25 |
| LMCD1-AS1          | 4.04 | 4.44 | 3.58 |
| LOC100133683       | 4.04 | 4.31 | 3.52 |
| PLEKHO1            | 4.04 | 4.62 | 3.49 |
| OTTHUMG00000159705 | 4.04 | 4.55 | 3.57 |
| LOC100506766       | 4.04 | 4.49 | 3.55 |
| NDN                | 4.04 | 4.27 | 3.60 |
| LOC100505735       | 4.04 | 4.51 | 3.69 |
| OTTHUMG00000177876 | 4.04 | 4.83 | 3.28 |
| OTTHUMG00000152762 | 4.04 | 4.55 | 3.39 |
| OTTHUMG00000173224 | 4.04 | 4.53 | 3.34 |
| DNAJC12            | 4.04 | 4.46 | 3.51 |
| LINC00548          | 4.04 | 4.49 | 3.62 |
| LEMD1-AS1          | 4.04 | 4.44 | 3.88 |
| LOC100505666       | 4.04 | 4.59 | 3.62 |
| ADIPOQ-AS1         | 4.04 | 4.72 | 3.05 |

|                    |      |      |      |
|--------------------|------|------|------|
| DPPA4              | 4.04 | 4.69 | 3.56 |
| CYSLTR1            | 4.04 | 5.10 | 2.93 |
| DNAH2              | 4.04 | 4.43 | 3.70 |
| LINC00359          | 4.04 | 4.62 | 3.24 |
| LIPC               | 4.04 | 4.27 | 3.74 |
| GCNT7              | 4.04 | 4.36 | 3.71 |
| C8orf49            | 4.04 | 4.56 | 3.67 |
| SPATA8-AS1         | 4.04 | 4.72 | 3.46 |
| GABRP              | 4.04 | 4.35 | 3.57 |
| SNRPF              | 4.04 | 4.39 | 3.57 |
| XRCC6BP1           | 4.04 | 4.30 | 3.67 |
| OR2S2              | 4.04 | 4.45 | 3.42 |
| MC5R               | 4.04 | 4.68 | 3.61 |
| TMEM75             | 4.04 | 4.30 | 3.69 |
| FRAT1              | 4.04 | 4.68 | 3.61 |
| SRL                | 4.04 | 4.76 | 3.39 |
| OLFM3              | 4.04 | 4.63 | 3.58 |
| ZSCAN12P1          | 4.04 | 4.46 | 3.77 |
| LOC100996663       | 4.04 | 4.50 | 3.46 |
| SDR16C5            | 4.04 | 4.54 | 3.62 |
| OTTHUMG00000153105 | 4.04 | 4.69 | 3.41 |
| CD247              | 4.04 | 4.34 | 3.74 |
| RASAL1             | 4.04 | 4.72 | 3.30 |
| OTTHUMG00000172611 | 4.04 | 4.84 | 3.62 |
| LOC729867          | 4.04 | 4.58 | 3.64 |
| SLFN14             | 4.04 | 4.44 | 3.57 |
| UNC80              | 4.04 | 4.34 | 3.67 |
| OTTHUMG00000183047 | 4.04 | 4.52 | 3.42 |
| SRD5A1             | 4.04 | 4.48 | 3.33 |
| GIMD1              | 4.04 | 4.45 | 3.67 |
| LINC00838          | 4.04 | 4.67 | 3.83 |
| MIR7-2             | 4.04 | 4.81 | 3.41 |
| LOC643733          | 4.04 | 5.19 | 2.83 |
| OTTHUMG00000009500 | 4.04 | 5.22 | 2.52 |
| TRIM63             | 4.04 | 4.46 | 3.72 |
| SLC45A4            | 4.04 | 4.45 | 3.66 |
| SMG8               | 4.04 | 4.41 | 3.60 |
| SLC22A2            | 4.04 | 4.37 | 3.76 |
| FAM47A             | 4.04 | 4.46 | 3.49 |
| NEK10              | 4.03 | 4.21 | 3.81 |
| RFESD              | 4.03 | 4.74 | 3.26 |
| LOC100505918       | 4.03 | 4.73 | 3.69 |
| IL36RN             | 4.03 | 4.49 | 3.58 |
| OSBPL7             | 4.03 | 4.36 | 3.66 |
| APOE               | 4.03 | 4.80 | 3.37 |
| NPAS1              | 4.03 | 4.39 | 3.61 |
| OOEP               | 4.03 | 4.52 | 3.69 |
| DNAJA4             | 4.03 | 4.33 | 3.59 |
| FLJ32154           | 4.03 | 4.39 | 3.55 |

|                    |      |      |      |
|--------------------|------|------|------|
| SAMD5              | 4.03 | 4.35 | 3.31 |
| TLX1               | 4.03 | 4.40 | 3.50 |
| SPTBN2             | 4.03 | 4.30 | 3.82 |
| OTTHUMG00000153180 | 4.03 | 4.54 | 3.65 |
| LOC100505921       | 4.03 | 4.47 | 3.51 |
| OTTHUMG00000032013 | 4.03 | 4.64 | 3.48 |
| MACROD2-AS1        | 4.03 | 4.62 | 3.56 |
| ARHGFEF38-IT1      | 4.03 | 4.61 | 3.50 |
| NPB                | 4.03 | 4.45 | 3.69 |
| CLDN4              | 4.03 | 4.32 | 3.59 |
| AMH                | 4.03 | 4.23 | 3.80 |
| LOC100132146       | 4.03 | 4.29 | 3.54 |
| CST9               | 4.03 | 4.26 | 3.70 |
| MIR4253            | 4.03 | 5.05 | 2.85 |
| MIR4435-1          | 4.03 | 4.50 | 3.64 |
| CYP4F22            | 4.03 | 4.77 | 3.46 |
| FAM71A             | 4.03 | 4.43 | 3.54 |
| MIR374B            | 4.03 | 4.93 | 2.94 |
| RAB6C              | 4.03 | 4.73 | 3.26 |
| C10orf35           | 4.03 | 4.25 | 3.41 |
| GIMAP7             | 4.03 | 4.73 | 3.26 |
| LOXHD1             | 4.03 | 4.60 | 3.59 |
| AIM2               | 4.03 | 4.56 | 3.72 |
| OTTHUMG00000019502 | 4.03 | 4.56 | 3.70 |
| TEX14              | 4.03 | 4.33 | 3.71 |
| OGDHL              | 4.03 | 4.52 | 3.68 |
| HIVEP3             | 4.03 | 4.62 | 3.38 |
| OTTHUMG00000167521 | 4.03 | 4.60 | 3.50 |
| LOC100288814       | 4.03 | 4.44 | 3.60 |
| LOC100291105       | 4.03 | 4.42 | 3.76 |
| C3orf65            | 4.03 | 4.77 | 3.49 |
| JPH3               | 4.03 | 4.33 | 3.71 |
| AOX1               | 4.03 | 4.49 | 3.46 |
| FLJ41130           | 4.03 | 4.51 | 3.69 |
| NAP1L3             | 4.03 | 4.44 | 3.48 |
| FAM72C             | 4.03 | 4.46 | 3.59 |
| IL1RL1             | 4.03 | 4.37 | 3.80 |
| OTTHUMG00000165649 | 4.03 | 4.46 | 3.65 |
| ZNF274             | 4.03 | 4.47 | 3.53 |
| ZNF225             | 4.03 | 4.64 | 3.18 |
| ALS2CR11           | 4.03 | 4.51 | 3.41 |
| OPALIN             | 4.03 | 4.53 | 3.77 |
| C14orf164          | 4.03 | 4.34 | 3.63 |
| OTTHUMG00000168443 | 4.03 | 4.85 | 3.43 |
| MBLAC1             | 4.03 | 4.39 | 3.75 |
| OR2B11             | 4.03 | 4.74 | 3.31 |
| ARGFXP2            | 4.03 | 4.48 | 3.66 |
| LINC00445          | 4.03 | 4.56 | 3.80 |
| FBXO36             | 4.03 | 4.45 | 3.62 |

|                    |      |      |      |
|--------------------|------|------|------|
| KCNQ3              | 4.03 | 4.42 | 3.71 |
| LOC150577          | 4.03 | 4.39 | 3.59 |
| C8orf12            | 4.03 | 4.41 | 3.81 |
| STARD8             | 4.03 | 4.78 | 3.07 |
| CACNG2             | 4.03 | 4.82 | 3.40 |
| FAM83G             | 4.03 | 4.51 | 3.71 |
| GPR17              | 4.03 | 4.37 | 3.62 |
| OTTHUMG00000164738 | 4.03 | 4.46 | 3.42 |
| OTTHUMG00000152908 | 4.03 | 4.72 | 3.42 |
| LOC100128905       | 4.03 | 4.88 | 3.64 |
| C8orf17            | 4.03 | 4.24 | 3.85 |
| TRAV13-1           | 4.03 | 4.44 | 3.48 |
| THAP10             | 4.03 | 4.32 | 3.77 |
| CDKN2B             | 4.03 | 4.37 | 3.58 |
| HOTTIP             | 4.02 | 4.41 | 3.18 |
| PKD1L3             | 4.02 | 4.53 | 3.51 |
| MSANTD1            | 4.02 | 4.45 | 3.30 |
| ANO5               | 4.02 | 4.94 | 3.39 |
| CBLN4              | 4.02 | 4.45 | 3.63 |
| OTTHUMG00000046223 | 4.02 | 4.66 | 3.21 |
| HRK                | 4.02 | 4.32 | 3.61 |
| LOC339788          | 4.02 | 4.51 | 3.61 |
| PDSS1              | 4.02 | 4.46 | 3.46 |
| LOC100505676       | 4.02 | 4.39 | 3.47 |
| GAD2               | 4.02 | 4.48 | 3.71 |
| MAP2               | 4.02 | 4.72 | 3.49 |
| PNLIPRP1           | 4.02 | 4.45 | 3.51 |
| TBC1D21            | 4.02 | 4.48 | 3.58 |
| LOC100507053       | 4.02 | 4.52 | 3.70 |
| FLJ45671           | 4.02 | 4.76 | 3.69 |
| TEKT2              | 4.02 | 4.32 | 3.82 |
| OTTHUMG00000152930 | 4.02 | 4.51 | 3.66 |
| SNORD116-27        | 4.02 | 4.94 | 2.99 |
| KRT5               | 4.02 | 4.21 | 3.75 |
| OTTHUMG00000159958 | 4.02 | 4.77 | 3.56 |
| SORCS1             | 4.02 | 4.60 | 3.62 |
| LCNL1              | 4.02 | 4.29 | 3.69 |
| NOTUM              | 4.02 | 4.28 | 3.76 |
| FAM155B            | 4.02 | 4.32 | 3.47 |
| CAMSAP3            | 4.02 | 4.35 | 3.72 |
| OLFML2A            | 4.02 | 4.82 | 2.84 |
| OTTHUMG00000156193 | 4.02 | 4.87 | 3.59 |
| C22orf24           | 4.02 | 4.58 | 3.79 |
| OTTHUMG00000150859 | 4.02 | 4.34 | 3.75 |
| LINC00536          | 4.02 | 4.52 | 3.64 |
| ZNF782             | 4.02 | 4.26 | 3.73 |
| LOC100507199       | 4.02 | 4.33 | 3.61 |
| RNU6-82P           | 4.02 | 4.79 | 3.03 |
| OTTHUMG00000161345 | 4.02 | 4.67 | 3.61 |

|                    |      |      |      |
|--------------------|------|------|------|
| FAM3D              | 4.02 | 4.34 | 3.76 |
| LOC284551          | 4.02 | 4.26 | 3.73 |
| OTTHUMG00000019702 | 4.02 | 4.51 | 3.74 |
| METTL24            | 4.02 | 4.36 | 3.67 |
| HIST1H1D           | 4.02 | 4.42 | 3.72 |
| PWWP2B             | 4.02 | 4.75 | 3.55 |
| OAZ3               | 4.02 | 4.46 | 3.30 |
| BTD                | 4.02 | 4.49 | 3.71 |
| LINC00336          | 4.02 | 4.71 | 3.44 |
| HOXB9              | 4.02 | 4.41 | 3.59 |
| KIF9               | 4.02 | 4.40 | 3.59 |
| PZP                | 4.02 | 4.58 | 3.71 |
| ZNF284             | 4.02 | 4.94 | 3.24 |
| SYT6               | 4.02 | 4.37 | 3.78 |
| OTTHUMG00000041219 | 4.02 | 4.59 | 3.47 |
| LOC646241          | 4.02 | 4.52 | 3.50 |
| TRAJ36             | 4.02 | 5.06 | 3.52 |
| NXPE4              | 4.02 | 4.38 | 3.40 |
| LOC100129636       | 4.02 | 4.43 | 3.76 |
| NPAS4              | 4.02 | 4.74 | 3.44 |
| ZNF195             | 4.02 | 4.28 | 3.60 |
| C17orf77           | 4.02 | 4.61 | 3.66 |
| CDHR3              | 4.02 | 4.19 | 3.89 |
| GPR160             | 4.02 | 4.39 | 3.79 |
| PAWR               | 4.02 | 4.46 | 3.63 |
| OTTHUMG00000152523 | 4.01 | 4.87 | 3.24 |
| NTNG1              | 4.01 | 4.44 | 3.71 |
| AMIGO2             | 4.01 | 4.55 | 3.57 |
| FAS-AS1            | 4.01 | 4.55 | 3.54 |
| C11orf82           | 4.01 | 4.39 | 3.70 |
| GABRQ              | 4.01 | 4.27 | 3.71 |
| SLC3A1             | 4.01 | 4.83 | 3.64 |
| LOC51145           | 4.01 | 4.64 | 3.55 |
| OTTHUMG00000161392 | 4.01 | 4.44 | 3.38 |
| LOC100132055       | 4.01 | 4.25 | 3.70 |
| OTTHUMG00000169088 | 4.01 | 4.71 | 3.54 |
| OTTHUMG00000159367 | 4.01 | 4.71 | 3.23 |
| NETO1              | 4.01 | 4.51 | 3.69 |
| DCLRE1A            | 4.01 | 4.45 | 3.70 |
| LOH12CR2           | 4.01 | 4.24 | 3.63 |
| ABO                | 4.01 | 5.04 | 3.32 |
| LOC100506923       | 4.01 | 4.30 | 3.28 |
| ZNF396             | 4.01 | 4.46 | 3.42 |
| PRDM9              | 4.01 | 4.79 | 3.29 |
| TEX37              | 4.01 | 4.37 | 3.61 |
| FGD5P1             | 4.01 | 4.25 | 3.44 |
| OTTHUMG00000163748 | 4.01 | 4.52 | 3.71 |
| LOC285696          | 4.01 | 4.19 | 3.72 |
| LOC100130169       | 4.01 | 4.66 | 3.62 |

|                     |      |      |      |
|---------------------|------|------|------|
| EPDR1               | 4.01 | 4.40 | 3.37 |
| OTTHUMG00000015498  | 4.01 | 4.45 | 3.64 |
| TTC25               | 4.01 | 4.36 | 3.71 |
| POTEG               | 4.01 | 4.53 | 3.66 |
| OTTHUMG000000150375 | 4.01 | 4.29 | 3.68 |
| RNASE3              | 4.01 | 4.83 | 3.15 |
| GCA                 | 4.01 | 4.43 | 3.81 |
| TCL1A               | 4.01 | 4.54 | 3.55 |
| NEDD9               | 4.01 | 4.32 | 3.73 |
| LINC00494           | 4.01 | 4.59 | 3.66 |
| ZYG11A              | 4.01 | 4.41 | 3.47 |
| LOC100507160        | 4.01 | 4.40 | 3.58 |
| CCDC181             | 4.01 | 4.41 | 3.66 |
| SGCG                | 4.01 | 4.72 | 3.55 |
| CCDC147             | 4.01 | 4.29 | 3.83 |
| LOC100506083        | 4.01 | 4.55 | 3.63 |
| DIAPH3              | 4.01 | 4.97 | 3.43 |
| OR8H2               | 4.01 | 5.55 | 3.02 |
| OTTHUMG000000183949 | 4.01 | 4.28 | 3.65 |
| EPX                 | 4.01 | 4.39 | 3.61 |
| LPP-AS1             | 4.01 | 4.56 | 3.57 |
| DNASE2B             | 4.01 | 4.41 | 3.63 |
| OR51E1              | 4.01 | 4.66 | 3.06 |
| FOXF2               | 4.01 | 4.70 | 3.48 |
| STIL                | 4.01 | 4.38 | 3.80 |
| DKFZp434L192        | 4.01 | 4.53 | 3.68 |
| OTTHUMG000000151740 | 4.01 | 4.32 | 3.38 |
| LINC00661           | 4.01 | 4.30 | 3.45 |
| THOC7-AS1           | 4.01 | 4.14 | 3.78 |
| NOTO                | 4.01 | 4.38 | 3.62 |
| ADAMTS9-AS1         | 4.01 | 4.47 | 3.65 |
| GLT6D1              | 4.01 | 4.51 | 3.58 |
| OTTHUMG000000168872 | 4.01 | 4.44 | 3.47 |
| NPTXR               | 4.00 | 4.45 | 3.45 |
| RGS8                | 4.00 | 4.44 | 3.61 |
| ZNF57               | 4.00 | 4.45 | 3.50 |
| OTTHUMG000000170258 | 4.00 | 4.53 | 3.52 |
| PRINS               | 4.00 | 4.67 | 3.64 |
| LINC00313           | 4.00 | 4.43 | 3.21 |
| LOC100506373        | 4.00 | 4.34 | 3.60 |
| CCK                 | 4.00 | 4.35 | 3.47 |
| LOC100507140        | 4.00 | 4.48 | 3.24 |
| WFDC8               | 4.00 | 4.54 | 3.48 |
| LOC100130238        | 4.00 | 4.29 | 3.59 |
| C1orf222            | 4.00 | 4.42 | 3.69 |
| TTY7                | 4.00 | 4.50 | 3.55 |
| GSG1                | 4.00 | 4.60 | 3.66 |
| SPDYE4              | 4.00 | 4.41 | 3.69 |
| GP9                 | 4.00 | 4.26 | 3.61 |

|                    |      |      |      |
|--------------------|------|------|------|
| FHL5               | 4.00 | 5.83 | 2.84 |
| OTTHUMG00000021953 | 4.00 | 4.75 | 3.32 |
| SNORD116-10        | 4.00 | 4.75 | 3.36 |
| ZNF778             | 4.00 | 4.36 | 3.70 |
| STC1               | 4.00 | 4.22 | 3.63 |
| GNA14              | 4.00 | 4.29 | 3.75 |
| CRISP3             | 4.00 | 4.49 | 3.49 |
| ZFY                | 4.00 | 4.51 | 3.31 |
| DGCR5              | 4.00 | 4.40 | 3.63 |
| ADCY8              | 4.00 | 4.38 | 3.76 |
| PRSS42             | 4.00 | 4.30 | 3.80 |
| LINC00167          | 4.00 | 4.33 | 3.75 |
| LOC100131496       | 4.00 | 4.45 | 3.59 |
| ANKRD30BP2         | 4.00 | 5.58 | 3.38 |
| DBC1               | 4.00 | 4.52 | 3.52 |
| MIR487B            | 4.00 | 5.51 | 2.79 |
| OTTHUMG00000163488 | 4.00 | 4.56 | 3.35 |
| SLC7A3             | 4.00 | 4.92 | 3.50 |
| OTTHUMG00000156402 | 4.00 | 4.81 | 3.62 |
| TPO                | 4.00 | 4.51 | 3.81 |
| ZNF702P            | 4.00 | 4.59 | 3.44 |
| OTTHUMG00000153209 | 4.00 | 4.68 | 3.45 |
| OR1G1              | 4.00 | 4.83 | 3.58 |
| FAM111B            | 4.00 | 4.50 | 3.23 |
| CATSPER1           | 4.00 | 4.55 | 3.43 |
| MIR129-1           | 4.00 | 4.67 | 2.91 |
| OTTHUMG00000164043 | 4.00 | 4.39 | 3.50 |
| CNDP1              | 4.00 | 4.50 | 3.44 |
| LINC00311          | 4.00 | 4.42 | 3.71 |
| KCTD19             | 4.00 | 4.23 | 3.63 |
| OTTHUMG00000171341 | 4.00 | 4.49 | 3.45 |
| LOC147646          | 4.00 | 4.34 | 3.55 |
| MYF5               | 4.00 | 4.55 | 3.52 |
| NLGN4Y             | 4.00 | 4.88 | 3.21 |
| SFTA3              | 4.00 | 4.36 | 3.53 |
| BCAR4              | 4.00 | 4.49 | 3.57 |
| BSN                | 4.00 | 4.21 | 3.78 |
| ZKSCAN5            | 4.00 | 4.23 | 3.69 |
| OTTHUMG00000014842 | 4.00 | 4.57 | 3.60 |
| OTTHUMG00000031781 | 4.00 | 4.65 | 3.28 |
| ISX                | 3.99 | 4.38 | 3.35 |
| SNORD116-12        | 3.99 | 4.54 | 3.24 |
| RNFT2              | 3.99 | 4.52 | 3.64 |
| LOC100129520       | 3.99 | 4.44 | 3.48 |
| ESPL1              | 3.99 | 4.25 | 3.56 |
| RBMXL3             | 3.99 | 4.32 | 3.46 |
| LOC100507431       | 3.99 | 4.37 | 3.60 |
| CYP8B1             | 3.99 | 4.35 | 3.64 |
| PTPN20B            | 3.99 | 4.78 | 3.33 |

|                    |      |      |      |
|--------------------|------|------|------|
| SERPINA11          | 3.99 | 4.41 | 3.49 |
| MLLT10P1           | 3.99 | 4.33 | 3.64 |
| POLR1B             | 3.99 | 4.26 | 3.50 |
| AGMO               | 3.99 | 4.20 | 3.48 |
| OTTHUMG00000162519 | 3.99 | 4.51 | 3.24 |
| NDUFAF1            | 3.99 | 4.41 | 3.59 |
| CT60               | 3.99 | 4.48 | 3.63 |
| KIAA0895           | 3.99 | 4.26 | 3.81 |
| OTTHUMG00000171387 | 3.99 | 4.39 | 3.45 |
| PGA3               | 3.99 | 4.75 | 2.86 |
| GCKR               | 3.99 | 4.35 | 3.72 |
| OTTHUMG00000020335 | 3.99 | 4.67 | 2.82 |
| MARK1              | 3.99 | 4.30 | 3.66 |
| ODF4               | 3.99 | 4.65 | 3.57 |
| LOC100093698       | 3.99 | 4.37 | 3.35 |
| LOC100129029       | 3.99 | 4.31 | 3.65 |
| SLA2               | 3.99 | 4.77 | 3.44 |
| CCNYL1             | 3.99 | 4.76 | 2.84 |
| TIGD3              | 3.99 | 4.40 | 3.60 |
| AMBN               | 3.99 | 4.47 | 3.64 |
| VN1R2              | 3.99 | 4.73 | 3.62 |
| BTN1A1             | 3.99 | 4.53 | 3.72 |
| TEX13B             | 3.99 | 4.41 | 3.73 |
| LOC100130451       | 3.99 | 4.56 | 3.20 |
| MKRN7P             | 3.99 | 4.96 | 3.10 |
| MIR138-2           | 3.99 | 4.39 | 3.46 |
| TMPRSS7            | 3.99 | 4.23 | 3.73 |
| OTTHUMG00000164075 | 3.99 | 4.79 | 3.18 |
| SUN5               | 3.99 | 4.50 | 3.32 |
| PRSS37             | 3.99 | 4.52 | 3.45 |
| MIR3939            | 3.99 | 4.63 | 3.59 |
| CHML               | 3.99 | 5.00 | 3.26 |
| LOC389273          | 3.99 | 4.30 | 3.70 |
| MIR1972-1          | 3.99 | 4.45 | 3.49 |
| FAM86C1            | 3.99 | 4.44 | 3.42 |
| LINC00440          | 3.99 | 4.65 | 3.15 |
| OTTHUMG00000004135 | 3.99 | 4.62 | 3.13 |
| KCNIP1             | 3.99 | 4.43 | 3.63 |
| FLJ27255           | 3.99 | 4.57 | 3.39 |
| TM4SF19-AS1        | 3.99 | 4.61 | 3.64 |
| ZCWPW2             | 3.99 | 4.77 | 3.54 |
| MYEOV              | 3.99 | 4.28 | 3.69 |
| TMPRSS2            | 3.99 | 4.47 | 3.56 |
| RGS22              | 3.99 | 4.38 | 3.57 |
| LOC100506606       | 3.99 | 4.38 | 3.58 |
| PDE12              | 3.99 | 4.51 | 3.06 |
| LINC00239          | 3.99 | 4.23 | 3.72 |
| TMOD4              | 3.99 | 4.54 | 3.46 |
| NCBP2-AS1          | 3.99 | 4.15 | 3.72 |



|                     |      |      |      |
|---------------------|------|------|------|
| OTTHUMG00000015079  | 3.99 | 4.43 | 3.68 |
| OTTHUMG000000164263 | 3.99 | 4.60 | 3.47 |
| PCDHB3              | 3.98 | 4.34 | 3.42 |
| TBC1D4-AS1          | 3.98 | 4.75 | 3.35 |
| OTTHUMG00000019939  | 3.98 | 4.65 | 3.26 |
| OR11L1              | 3.98 | 4.37 | 3.53 |
| LINC00525           | 3.98 | 4.51 | 3.62 |
| AKAP5               | 3.98 | 4.41 | 3.72 |
| ATP8B3              | 3.98 | 4.40 | 3.59 |
| KRT72               | 3.98 | 4.43 | 2.97 |
| LOC644050           | 3.98 | 4.40 | 3.61 |
| SESN2               | 3.98 | 4.39 | 3.73 |
| RNF122              | 3.98 | 4.50 | 3.51 |
| OTTHUMG000000164837 | 3.98 | 4.88 | 3.39 |
| TSPAN33             | 3.98 | 4.33 | 3.69 |
| TRAJ17              | 3.98 | 4.33 | 3.02 |
| KRTAP20-4           | 3.98 | 4.42 | 2.91 |
| OTTHUMG000000150429 | 3.98 | 4.59 | 3.51 |
| OTTHUMG000000159413 | 3.98 | 4.37 | 3.53 |
| SLC39A2             | 3.98 | 4.62 | 3.48 |
| CYP26A1             | 3.98 | 4.49 | 3.27 |
| LOC389043           | 3.98 | 4.73 | 3.19 |
| DHRS7C              | 3.98 | 4.65 | 3.33 |
| GBA3                | 3.98 | 4.66 | 3.43 |
| KCNJ6-IT1           | 3.98 | 5.08 | 3.38 |
| OTTHUMG000000180232 | 3.98 | 4.68 | 3.37 |
| LINC00339           | 3.98 | 4.37 | 3.63 |
| OTTHUMG000000151592 | 3.98 | 4.28 | 3.68 |
| COL19A1             | 3.98 | 4.29 | 3.70 |
| GPC6-AS2            | 3.98 | 4.64 | 3.47 |
| TMIGD1              | 3.98 | 4.58 | 3.40 |
| KLRB1               | 3.98 | 4.29 | 3.54 |
| TEDDM1              | 3.98 | 4.31 | 3.61 |
| EGFL6               | 3.98 | 4.65 | 3.64 |
| ZNF750              | 3.98 | 4.22 | 3.72 |
| TBATA               | 3.98 | 4.22 | 3.67 |
| OTTHUMG000000169349 | 3.98 | 4.39 | 3.76 |
| ZNF268              | 3.98 | 4.53 | 3.49 |
| LINC00594           | 3.98 | 4.46 | 3.41 |
| CDCP2               | 3.98 | 4.35 | 3.46 |
| WT1                 | 3.98 | 4.35 | 3.63 |
| C4orf36             | 3.98 | 4.46 | 3.65 |
| OTTHUMG00000017910  | 3.98 | 5.01 | 3.31 |
| RGAG1               | 3.98 | 4.46 | 3.77 |
| VWDE                | 3.98 | 4.30 | 3.27 |
| FLJ41941            | 3.98 | 4.48 | 3.56 |
| KCTD6               | 3.98 | 4.53 | 3.54 |
| OTTHUMG000000162302 | 3.98 | 4.54 | 3.33 |
| B3GNT3              | 3.98 | 4.38 | 3.61 |

|                    |      |      |      |
|--------------------|------|------|------|
| GCSAM              | 3.98 | 4.42 | 3.71 |
| TDRD10             | 3.98 | 4.36 | 3.66 |
| FLJ33581           | 3.98 | 4.52 | 3.42 |
| C17orf102          | 3.98 | 4.40 | 3.63 |
| OTTHUMG00000162672 | 3.98 | 4.35 | 3.56 |
| OTTHUMG00000171168 | 3.98 | 4.60 | 3.53 |
| OTTHUMG00000018645 | 3.98 | 4.54 | 3.38 |
| MYOM2              | 3.98 | 4.24 | 3.77 |
| ZC3H12B            | 3.98 | 4.66 | 3.35 |
| FAM71B             | 3.98 | 4.72 | 3.47 |
| MGAT5B             | 3.98 | 4.39 | 3.71 |
| CACNG4             | 3.98 | 4.39 | 3.41 |
| POM121L2           | 3.98 | 4.39 | 3.41 |
| PHKA1-AS1          | 3.98 | 4.34 | 3.69 |
| MRPL40             | 3.98 | 4.29 | 3.68 |
| GREB1              | 3.98 | 4.44 | 3.78 |
| CLPSL1             | 3.98 | 4.38 | 3.75 |
| OTTHUMG00000020205 | 3.98 | 4.38 | 3.40 |
| OTTHUMG00000167224 | 3.98 | 4.47 | 2.93 |
| OTTHUMG00000182079 | 3.98 | 4.34 | 3.63 |
| OTTHUMG00000177747 | 3.98 | 4.23 | 3.53 |
| OTTHUMG00000163707 | 3.98 | 4.35 | 3.51 |
| SIRT4              | 3.98 | 4.30 | 3.66 |
| GOLGA6L7P          | 3.98 | 5.44 | 2.68 |
| ZFP57              | 3.98 | 4.31 | 3.72 |
| LINC00439          | 3.98 | 4.71 | 3.23 |
| LINC00511          | 3.98 | 4.64 | 3.38 |
| LOC440292          | 3.98 | 4.40 | 3.44 |
| TMEM74             | 3.98 | 4.36 | 3.15 |
| OTTHUMG00000152596 | 3.98 | 4.71 | 3.21 |
| OTTHUMG00000151596 | 3.98 | 4.42 | 3.48 |
| C16orf78           | 3.98 | 4.55 | 3.69 |
| RPL36P20           | 3.98 | 4.73 | 2.66 |
| OTTHUMG00000159111 | 3.98 | 4.38 | 3.59 |
| BCAS1              | 3.98 | 4.36 | 3.51 |
| NF1P2              | 3.98 | 4.45 | 2.87 |
| LOC100128560       | 3.98 | 4.28 | 3.58 |
| LOC100996342       | 3.98 | 4.20 | 3.55 |
| DLX6-AS1           | 3.98 | 4.38 | 3.68 |
| LOC100130954       | 3.98 | 4.53 | 3.38 |
| FLJ37035           | 3.98 | 4.68 | 3.63 |
| MIR3685            | 3.98 | 4.70 | 2.71 |
| OTTHUMG00000159625 | 3.97 | 4.42 | 3.43 |
| DCSTAMP            | 3.97 | 4.45 | 3.47 |
| OTTHUMG00000132645 | 3.97 | 4.38 | 3.56 |
| MIR1324            | 3.97 | 4.38 | 3.62 |
| TCF24              | 3.97 | 4.28 | 3.52 |
| RNASE11            | 3.97 | 4.51 | 3.42 |
| OTTHUMG00000137386 | 3.97 | 4.25 | 3.79 |

|                    |      |      |      |
|--------------------|------|------|------|
| TRIL               | 3.97 | 4.13 | 3.70 |
| FAM26F             | 3.97 | 4.69 | 3.04 |
| SPRED3             | 3.97 | 4.20 | 3.72 |
| SLC10A2            | 3.97 | 4.42 | 3.54 |
| ZFPM2              | 3.97 | 4.36 | 3.57 |
| CEBPE              | 3.97 | 4.23 | 3.79 |
| OTTHUMG00000170224 | 3.97 | 4.41 | 3.54 |
| LOC100131132       | 3.97 | 4.13 | 3.80 |
| FAM66A             | 3.97 | 4.85 | 3.06 |
| LINC00092          | 3.97 | 4.52 | 3.63 |
| LINC00112          | 3.97 | 4.59 | 3.40 |
| FOXR1              | 3.97 | 4.47 | 3.30 |
| LOC389023          | 3.97 | 4.48 | 3.51 |
| LOC100506411       | 3.97 | 4.41 | 3.45 |
| LGALS12            | 3.97 | 4.74 | 3.63 |
| S100A7             | 3.97 | 4.47 | 3.39 |
| COMMD6             | 3.97 | 4.31 | 3.49 |
| TRPV1              | 3.97 | 4.26 | 3.63 |
| AMZ2P1             | 3.97 | 4.51 | 3.46 |
| TAS2R31            | 3.97 | 4.64 | 2.40 |
| OTTHUMG00000019965 | 3.97 | 5.18 | 3.10 |
| OTTHUMG00000161731 | 3.97 | 4.65 | 3.24 |
| FUNDC2             | 3.97 | 4.22 | 3.73 |
| CCDC42             | 3.97 | 4.50 | 3.52 |
| LINC00174          | 3.97 | 4.55 | 3.64 |
| PCYT1B             | 3.97 | 4.29 | 3.62 |
| DUPD1              | 3.97 | 4.36 | 3.54 |
| TDRD9              | 3.97 | 4.55 | 3.61 |
| LOC400456          | 3.97 | 4.40 | 3.48 |
| MMRN1              | 3.97 | 4.76 | 3.17 |
| LOC285441          | 3.97 | 4.38 | 3.54 |
| LCE2D              | 3.97 | 4.53 | 3.30 |
| NKX2-2             | 3.97 | 4.52 | 3.54 |
| LOC100506271       | 3.97 | 4.37 | 3.47 |
| RPS6KA6            | 3.97 | 4.56 | 3.07 |
| C8orf37            | 3.97 | 4.43 | 3.46 |
| OR14C36            | 3.97 | 4.46 | 3.48 |
| LINC00909          | 3.97 | 4.28 | 3.55 |
| RNA5SP395          | 3.97 | 4.78 | 3.20 |
| MIR431             | 3.97 | 4.47 | 3.65 |
| MIR4295            | 3.97 | 5.13 | 2.96 |
| SPATA9             | 3.97 | 4.41 | 3.32 |
| TGM5               | 3.97 | 4.35 | 3.71 |
| C16orf93           | 3.97 | 4.36 | 3.10 |
| OR1S1              | 3.97 | 4.80 | 2.81 |
| TRHDE-AS1          | 3.97 | 4.77 | 3.09 |
| OTUD7A             | 3.97 | 4.32 | 3.32 |
| OTTHUMG00000151942 | 3.97 | 4.34 | 3.47 |
| SPACA3             | 3.97 | 4.39 | 3.60 |

|                    |      |      |      |
|--------------------|------|------|------|
| LOC100652758       | 3.97 | 4.33 | 3.50 |
| YPLR6490           | 3.97 | 4.41 | 3.53 |
| POU4F2             | 3.97 | 4.24 | 3.74 |
| TRAV40             | 3.97 | 4.69 | 3.34 |
| CLEC2L             | 3.97 | 4.18 | 3.59 |
| LINC00211          | 3.97 | 4.28 | 3.50 |
| KCND2              | 3.97 | 4.41 | 3.61 |
| GPR55              | 3.97 | 4.64 | 3.64 |
| FLJ90680           | 3.97 | 4.61 | 3.38 |
| NEK2               | 3.97 | 4.59 | 3.42 |
| MIR511-1           | 3.97 | 4.89 | 3.41 |
| CCAT1              | 3.97 | 4.31 | 3.63 |
| RNU4ATAC2P         | 3.97 | 4.50 | 3.50 |
| HIST1H3E           | 3.97 | 5.29 | 2.67 |
| MIR188             | 3.97 | 4.57 | 3.28 |
| OTTHUMG00000018238 | 3.97 | 4.39 | 3.44 |
| ELOVL7             | 3.97 | 4.28 | 3.57 |
| OTTHUMG00000158502 | 3.97 | 4.37 | 3.49 |
| REC8               | 3.97 | 4.28 | 3.65 |
| MIR4704            | 3.96 | 4.62 | 3.18 |
| LOC100499183       | 3.96 | 4.57 | 3.66 |
| LPPR3              | 3.96 | 4.62 | 3.21 |
| RSPH10B2           | 3.96 | 4.41 | 3.38 |
| GPR33              | 3.96 | 4.60 | 3.53 |
| LINC00102          | 3.96 | 4.41 | 3.27 |
| NKAPP1             | 3.96 | 4.44 | 3.66 |
| OTTHUMG00000154733 | 3.96 | 4.40 | 3.48 |
| OTTHUMG00000166136 | 3.96 | 4.57 | 3.67 |
| USP49              | 3.96 | 4.48 | 3.62 |
| RAD51AP1           | 3.96 | 4.51 | 3.73 |
| ABCB5              | 3.96 | 4.80 | 3.57 |
| ELAVL3             | 3.96 | 4.45 | 3.35 |
| BPIFC              | 3.96 | 4.40 | 3.71 |
| LOC643085          | 3.96 | 4.33 | 3.64 |
| COLEC10            | 3.96 | 4.21 | 3.69 |
| OTTHUMG00000162626 | 3.96 | 4.57 | 3.28 |
| EID3               | 3.96 | 4.29 | 3.49 |
| ACTN1-AS1          | 3.96 | 4.35 | 3.47 |
| UPB1               | 3.96 | 4.20 | 3.32 |
| HLX                | 3.96 | 4.18 | 3.63 |
| CA1                | 3.96 | 4.32 | 3.55 |
| ACOXL              | 3.96 | 4.26 | 3.53 |
| OTTHUMG00000066368 | 3.96 | 4.54 | 3.46 |
| LOC100128374       | 3.96 | 4.34 | 3.67 |
| PACRG              | 3.96 | 4.33 | 3.40 |
| LOC100133032       | 3.96 | 4.41 | 3.42 |
| ZNF169             | 3.96 | 4.22 | 3.66 |
| TSG1               | 3.96 | 4.41 | 3.64 |
| GPR78              | 3.96 | 4.53 | 3.37 |

|                    |      |      |      |
|--------------------|------|------|------|
| TLDC2              | 3.96 | 4.35 | 3.35 |
| ZC3H12D            | 3.96 | 4.26 | 3.37 |
| SKINTL             | 3.96 | 4.68 | 3.70 |
| OTTHUMG00000156732 | 3.96 | 4.49 | 3.56 |
| ROPN1L             | 3.96 | 4.40 | 3.66 |
| OTTHUMG00000168414 | 3.96 | 4.39 | 3.45 |
| PP12708            | 3.96 | 4.38 | 3.40 |
| APOB               | 3.96 | 4.63 | 3.50 |
| PPP2R3B            | 3.96 | 4.18 | 3.80 |
| LINC00371          | 3.96 | 4.28 | 3.51 |
| SPTB               | 3.96 | 4.29 | 3.67 |
| LOC100506048       | 3.96 | 4.64 | 3.55 |
| LOC284577          | 3.96 | 4.53 | 3.40 |
| LOC150568          | 3.96 | 4.28 | 3.63 |
| OTTHUMG00000152844 | 3.96 | 4.24 | 3.53 |
| MIR634             | 3.96 | 4.99 | 2.99 |
| KRT77              | 3.96 | 4.80 | 3.32 |
| CLDN1              | 3.96 | 4.31 | 3.40 |
| SPINK4             | 3.96 | 4.32 | 3.34 |
| LOC100652911       | 3.96 | 4.25 | 3.64 |
| OTTHUMG00000153489 | 3.96 | 4.19 | 3.65 |
| RADIL              | 3.96 | 4.36 | 3.60 |
| TRGV2              | 3.95 | 4.65 | 3.28 |
| SLC36A3            | 3.95 | 4.32 | 3.67 |
| HHATL-AS1          | 3.95 | 4.42 | 3.48 |
| OTTHUMG00000153644 | 3.95 | 4.46 | 3.37 |
| KRTAP25-1          | 3.95 | 4.56 | 3.62 |
| NRG4               | 3.95 | 4.46 | 3.63 |
| OTTHUMG00000041351 | 3.95 | 4.44 | 3.51 |
| OTTHUMG00000150930 | 3.95 | 4.20 | 3.57 |
| LOC100505613       | 3.95 | 4.76 | 2.85 |
| IL1A               | 3.95 | 4.25 | 3.43 |
| GRHL3              | 3.95 | 4.57 | 3.48 |
| ALYREF             | 3.95 | 4.66 | 3.47 |
| FLJ38576           | 3.95 | 4.58 | 3.27 |
| SDPR               | 3.95 | 4.59 | 3.13 |
| LOC730139          | 3.95 | 4.32 | 3.59 |
| C14orf28           | 3.95 | 4.29 | 3.50 |
| SCML4              | 3.95 | 4.29 | 3.53 |
| TMEM177            | 3.95 | 4.16 | 3.68 |
| RNU7-9P            | 3.95 | 5.65 | 3.41 |
| NKX6-3             | 3.95 | 4.48 | 3.46 |
| PRAM1              | 3.95 | 4.77 | 3.41 |
| APOO               | 3.95 | 5.10 | 2.47 |
| LOC100507077       | 3.95 | 4.60 | 3.62 |
| TPTE2              | 3.95 | 4.24 | 3.58 |
| C17orf78           | 3.95 | 4.38 | 3.61 |
| ESR1               | 3.95 | 4.37 | 3.36 |
| NUDT11             | 3.95 | 4.95 | 2.22 |

|                    |      |      |      |
|--------------------|------|------|------|
| DCAF8L1            | 3.95 | 4.37 | 3.52 |
| ZNF572             | 3.95 | 4.33 | 3.60 |
| MPST               | 3.95 | 4.59 | 3.64 |
| OTTHUMG00000165330 | 3.95 | 4.13 | 3.61 |
| PRSS55             | 3.95 | 4.36 | 3.47 |
| UG0898H09          | 3.95 | 4.15 | 3.61 |
| MYLK3              | 3.95 | 4.28 | 3.55 |
| OTTHUMG00000164964 | 3.95 | 4.45 | 3.31 |
| AMER2              | 3.95 | 4.41 | 3.55 |
| LOC100507501       | 3.95 | 4.78 | 3.48 |
| NIPAL4             | 3.95 | 4.43 | 3.48 |
| OTTHUMG00000151813 | 3.95 | 4.44 | 3.23 |
| LRRTM3             | 3.95 | 4.39 | 3.40 |
| MIR16-2            | 3.95 | 4.62 | 3.32 |
| OTTHUMG00000163668 | 3.95 | 4.43 | 3.62 |
| IGKV1-6            | 3.95 | 4.70 | 2.93 |
| FAM173B            | 3.95 | 4.15 | 3.49 |
| OTTHUMG00000171591 | 3.95 | 4.53 | 3.22 |
| LOC730668          | 3.95 | 4.50 | 3.28 |
| C6orf52            | 3.95 | 4.45 | 3.17 |
| ACTL6B             | 3.95 | 4.39 | 3.43 |
| CLDN6              | 3.95 | 4.33 | 3.66 |
| GPC3               | 3.95 | 4.20 | 3.72 |
| OTTHUMG00000020213 | 3.95 | 4.41 | 3.37 |
| OR51M1             | 3.95 | 4.32 | 3.52 |
| OTTHUMG00000170975 | 3.95 | 4.28 | 3.53 |
| ABCA13             | 3.95 | 4.35 | 3.67 |
| MOGAT1             | 3.95 | 4.49 | 3.66 |
| OTTHUMG00000161851 | 3.95 | 4.68 | 3.42 |
| IDI2               | 3.95 | 4.34 | 3.67 |
| MIR885             | 3.95 | 4.24 | 3.58 |
| FAM71F1            | 3.94 | 4.27 | 3.63 |
| LOC286177          | 3.94 | 4.46 | 3.29 |
| ZNF667             | 3.94 | 4.64 | 3.40 |
| GRIN3A             | 3.94 | 4.30 | 3.48 |
| SLC25A41           | 3.94 | 4.73 | 3.13 |
| OTTHUMG00000008128 | 3.94 | 4.38 | 3.50 |
| TLL9               | 3.94 | 4.30 | 3.60 |
| SCN2B              | 3.94 | 4.56 | 3.44 |
| LOC283588          | 3.94 | 4.35 | 3.39 |
| OTTHUMG00000171478 | 3.94 | 4.83 | 3.05 |
| LOC100128593       | 3.94 | 4.32 | 3.62 |
| SIGLECL1           | 3.94 | 4.39 | 3.39 |
| LRP2               | 3.94 | 4.19 | 3.69 |
| MC2R               | 3.94 | 4.44 | 3.05 |
| DEFA5              | 3.94 | 4.54 | 3.29 |
| INTS4L1            | 3.94 | 4.80 | 3.22 |
| LOC286009          | 3.94 | 4.19 | 3.55 |
| DAZ1               | 3.94 | 4.58 | 3.35 |

|                     |      |      |      |
|---------------------|------|------|------|
| OTTHUMG00000018345  | 3.94 | 4.72 | 3.33 |
| FCER1A              | 3.94 | 5.56 | 3.34 |
| MFSD2B              | 3.94 | 4.21 | 3.57 |
| FBXO40              | 3.94 | 4.66 | 3.37 |
| LINC00959           | 3.94 | 4.17 | 3.76 |
| LOC100506393        | 3.94 | 4.17 | 3.52 |
| LOC100293612        | 3.94 | 4.23 | 3.74 |
| DKK1                | 3.94 | 5.47 | 2.40 |
| TMEM191A            | 3.94 | 4.95 | 3.45 |
| FAM219B             | 3.94 | 4.18 | 3.78 |
| TRAV30              | 3.94 | 4.39 | 3.43 |
| SERPINA4            | 3.94 | 4.39 | 3.56 |
| OTTHUMG000000151460 | 3.94 | 4.45 | 3.00 |
| DTNA                | 3.94 | 4.32 | 3.50 |
| STK33               | 3.94 | 4.35 | 3.69 |
| OTTHUMG00000017736  | 3.94 | 4.59 | 3.25 |
| C7                  | 3.94 | 5.16 | 2.76 |
| PRM1                | 3.94 | 4.99 | 3.26 |
| LOC100996404        | 3.94 | 4.26 | 3.42 |
| MIR1197             | 3.94 | 5.64 | 3.38 |
| MSL3P1              | 3.94 | 4.46 | 3.34 |
| AP4B1-AS1           | 3.94 | 4.52 | 3.11 |
| LILRA5              | 3.94 | 4.35 | 3.36 |
| SVOP                | 3.94 | 4.62 | 3.62 |
| C20orf201           | 3.94 | 4.56 | 3.30 |
| PCDH7               | 3.94 | 4.46 | 3.54 |
| FLJ30375            | 3.94 | 4.47 | 3.43 |
| WDR17               | 3.94 | 4.24 | 3.58 |
| LOC285692           | 3.94 | 4.41 | 3.40 |
| C19orf40            | 3.94 | 4.27 | 3.67 |
| TAF7L               | 3.94 | 4.52 | 3.63 |
| LOC100147773        | 3.94 | 4.24 | 3.47 |
| OTTHUMG000000167159 | 3.94 | 4.23 | 3.37 |
| RNF180              | 3.94 | 4.37 | 3.51 |
| HAR1B               | 3.94 | 4.42 | 3.32 |
| KCND3-AS1           | 3.94 | 4.49 | 3.52 |
| LOC100240735        | 3.94 | 4.80 | 3.22 |
| C11orf65            | 3.93 | 4.16 | 3.71 |
| TMEM17              | 3.93 | 4.53 | 3.54 |
| SAMD3               | 3.93 | 4.32 | 3.59 |
| OTTHUMG00000009791  | 3.93 | 4.52 | 3.13 |
| HTR1D               | 3.93 | 4.45 | 3.60 |
| UBAC2-AS1           | 3.93 | 4.36 | 3.53 |
| OTTHUMG00000030382  | 3.93 | 4.39 | 3.53 |
| L3MBTL4             | 3.93 | 4.50 | 3.29 |
| LOC727808           | 3.93 | 4.25 | 3.69 |
| DMTN                | 3.93 | 4.35 | 3.53 |
| AZFP                | 3.93 | 4.39 | 3.74 |
| MST1R               | 3.93 | 4.22 | 3.50 |

|                    |      |      |      |
|--------------------|------|------|------|
| LOC100188947       | 3.93 | 4.57 | 3.51 |
| OTTHUMG00000150610 | 3.93 | 5.06 | 3.20 |
| LOC100505768       | 3.93 | 4.39 | 3.22 |
| SLC24A4            | 3.93 | 4.23 | 3.73 |
| LYPD6B             | 3.93 | 4.15 | 3.53 |
| NLRP4              | 3.93 | 4.27 | 3.66 |
| C9orf53            | 3.93 | 4.29 | 3.57 |
| OTTHUMG00000014196 | 3.93 | 4.72 | 3.57 |
| LOC100132339       | 3.93 | 4.34 | 3.52 |
| NXF2B              | 3.93 | 4.28 | 3.51 |
| CASP1              | 3.93 | 4.54 | 3.47 |
| MMP20              | 3.93 | 4.43 | 3.50 |
| LRRC25             | 3.93 | 4.57 | 3.51 |
| SRY                | 3.93 | 5.41 | 2.37 |
| PPP5D1             | 3.93 | 4.45 | 3.41 |
| MAGEB18            | 3.93 | 4.18 | 3.62 |
| MIR1236            | 3.93 | 4.49 | 3.68 |
| LOC100130642       | 3.93 | 4.44 | 3.28 |
| TMEM229A           | 3.93 | 4.23 | 3.49 |
| CDKL2              | 3.93 | 4.52 | 3.55 |
| OTTHUMG00000178198 | 3.93 | 4.46 | 3.39 |
| OTTHUMG00000171462 | 3.93 | 4.28 | 3.54 |
| DIAPH3-AS2         | 3.93 | 4.77 | 3.47 |
| ZNF487P            | 3.93 | 4.59 | 3.39 |
| RIPPLY3            | 3.93 | 4.41 | 3.42 |
| SLC25A21-AS1       | 3.93 | 4.35 | 3.47 |
| KHDC3L             | 3.93 | 4.37 | 3.73 |
| OTTHUMG00000166470 | 3.93 | 4.33 | 3.54 |
| LOC100505989       | 3.93 | 4.63 | 3.29 |
| LRRC33             | 3.93 | 4.29 | 3.45 |
| C2orf61            | 3.93 | 4.48 | 3.34 |
| LOC100499194       | 3.93 | 4.40 | 3.59 |
| BCL2L14            | 3.93 | 4.45 | 3.71 |
| GDPGP1             | 3.93 | 4.22 | 3.44 |
| MT1DP              | 3.93 | 4.26 | 3.38 |
| OTTHUMG00000160511 | 3.93 | 4.57 | 3.56 |
| CLEC9A             | 3.93 | 4.86 | 3.26 |
| GK3P               | 3.93 | 4.80 | 3.42 |
| AURKA              | 3.93 | 4.38 | 3.45 |
| NLRP2              | 3.93 | 4.36 | 3.63 |
| FAM124A            | 3.93 | 4.38 | 3.63 |
| PLA2G7             | 3.93 | 4.43 | 3.57 |
| LOC100130899       | 3.93 | 4.36 | 3.42 |
| CYP2J2             | 3.93 | 4.37 | 3.26 |
| CHGA               | 3.93 | 4.63 | 3.37 |
| KCNJ10             | 3.93 | 4.58 | 3.35 |
| LOC100505625       | 3.93 | 4.39 | 3.56 |
| TMPRSS13           | 3.93 | 4.61 | 3.53 |
| WDR88              | 3.93 | 4.65 | 3.39 |



|                           |      |      |      |
|---------------------------|------|------|------|
| <i>C4orf40</i>            | 3.93 | 4.27 | 3.55 |
| <i>METAP1D</i>            | 3.93 | 4.31 | 3.55 |
| <i>OR6C74</i>             | 3.93 | 4.94 | 3.37 |
| <i>ZBP1</i>               | 3.93 | 4.40 | 3.64 |
| <i>PLS1</i>               | 3.93 | 4.31 | 3.46 |
| <i>PM20D1</i>             | 3.93 | 4.44 | 3.30 |
| <i>CHRM3</i>              | 3.93 | 4.48 | 3.61 |
| <i>CCDC147-AS1</i>        | 3.93 | 4.50 | 3.34 |
| <i>MIR4480</i>            | 3.93 | 4.44 | 3.45 |
| <i>KLHL13</i>             | 3.93 | 4.48 | 3.25 |
| <i>AZU1</i>               | 3.92 | 4.25 | 3.64 |
| <i>ZNF366</i>             | 3.92 | 4.56 | 3.31 |
| <i>SSUH2</i>              | 3.92 | 4.40 | 3.53 |
| <i>PROX1</i>              | 3.92 | 4.29 | 3.55 |
| <i>TDRD12</i>             | 3.92 | 4.27 | 3.73 |
| <i>TM7SF2</i>             | 3.92 | 4.23 | 3.54 |
| <i>RRH</i>                | 3.92 | 4.40 | 3.43 |
| <i>SLC35F1</i>            | 3.92 | 4.34 | 3.54 |
| <i>KRT20</i>              | 3.92 | 4.25 | 3.37 |
| <i>OTTHUMG00000171464</i> | 3.92 | 4.35 | 3.60 |
| <i>HELLS</i>              | 3.92 | 4.44 | 3.29 |
| <i>AGBL1</i>              | 3.92 | 4.24 | 3.69 |
| <i>PSKH2</i>              | 3.92 | 4.48 | 3.52 |
| <i>ST13P4</i>             | 3.92 | 4.27 | 3.57 |
| <i>SPATA31D4</i>          | 3.92 | 4.64 | 3.33 |
| <i>NHLRC1</i>             | 3.92 | 4.33 | 3.59 |
| <i>SIGLEC12</i>           | 3.92 | 4.19 | 3.76 |
| <i>OTTHUMG00000177234</i> | 3.92 | 4.33 | 3.19 |
| <i>OTTHUMG00000169333</i> | 3.92 | 4.26 | 3.46 |
| <i>OTTHUMG00000059447</i> | 3.92 | 4.42 | 3.27 |
| <i>SCML2</i>              | 3.92 | 4.40 | 3.42 |
| <i>IL12RB1</i>            | 3.92 | 4.24 | 3.36 |
| <i>STARD6</i>             | 3.92 | 4.51 | 3.67 |
| <i>FSHR</i>               | 3.92 | 4.28 | 3.48 |
| <i>HOXD9</i>              | 3.92 | 4.30 | 3.61 |
| <i>HNF1B</i>              | 3.92 | 4.49 | 3.58 |
| <i>PRSS30P</i>            | 3.92 | 4.45 | 3.27 |
| <i>OTTHUMG00000152486</i> | 3.92 | 4.17 | 3.55 |
| <i>DPP3</i>               | 3.92 | 4.13 | 3.62 |
| <i>GABRB1</i>             | 3.92 | 4.56 | 3.34 |
| <i>ZNF677</i>             | 3.92 | 4.13 | 3.67 |
| <i>CHST4</i>              | 3.92 | 4.49 | 3.57 |
| <i>ABCB11</i>             | 3.92 | 4.44 | 3.45 |
| <i>C21orf58</i>           | 3.92 | 4.48 | 3.17 |
| <i>OTTHUMG00000163284</i> | 3.92 | 4.17 | 3.60 |
| <i>LOC729609</i>          | 3.92 | 4.29 | 3.60 |
| <i>C10orf53</i>           | 3.92 | 4.31 | 3.57 |
| <i>LOC100506085</i>       | 3.92 | 4.48 | 3.52 |
| <i>FAM90A26P</i>          | 3.92 | 4.39 | 3.44 |

|                    |      |      |      |
|--------------------|------|------|------|
| LOC100289673       | 3.92 | 4.14 | 3.56 |
| IL12RB2            | 3.92 | 5.29 | 3.18 |
| WDR52-AS1          | 3.92 | 4.25 | 3.56 |
| LOC100128830       | 3.92 | 4.47 | 3.66 |
| XDH                | 3.92 | 4.57 | 3.52 |
| FREM1              | 3.92 | 4.27 | 3.50 |
| CCDC144NL          | 3.92 | 4.78 | 3.13 |
| ST6GALNAC5         | 3.92 | 4.55 | 3.62 |
| IL20RA             | 3.92 | 4.37 | 3.35 |
| SCNN1B             | 3.92 | 4.34 | 3.42 |
| CCL15-CCL14        | 3.92 | 4.98 | 2.90 |
| LINC00564          | 3.91 | 4.45 | 3.49 |
| LOC100505786       | 3.91 | 4.75 | 3.35 |
| C12orf36           | 3.91 | 4.66 | 3.53 |
| DEF6               | 3.91 | 4.22 | 3.78 |
| HTR1A              | 3.91 | 4.33 | 3.20 |
| OTTHUMG00000168473 | 3.91 | 4.22 | 3.51 |
| ANGPT1             | 3.91 | 4.87 | 3.03 |
| HNF4G              | 3.91 | 4.29 | 3.64 |
| STEAP1B            | 3.91 | 4.28 | 3.52 |
| ZNF587             | 3.91 | 4.51 | 3.28 |
| FAM226B            | 3.91 | 4.46 | 3.37 |
| NT5DC4             | 3.91 | 4.60 | 3.50 |
| OTTHUMG00000074200 | 3.91 | 4.28 | 3.58 |
| OTTHUMG00000163675 | 3.91 | 4.38 | 3.50 |
| SERPINA7           | 3.91 | 4.26 | 3.41 |
| FAM181A            | 3.91 | 4.23 | 3.58 |
| C16orf47           | 3.91 | 4.33 | 3.59 |
| KIAA1107           | 3.91 | 4.32 | 3.19 |
| LILRP2             | 3.91 | 4.45 | 3.26 |
| MEX3B              | 3.91 | 4.45 | 3.57 |
| PKHD1              | 3.91 | 4.46 | 3.67 |
| OTTHUMG00000151591 | 3.91 | 4.54 | 3.34 |
| ZNF571             | 3.91 | 4.16 | 3.59 |
| AIFM3              | 3.91 | 4.33 | 3.55 |
| TRBV5-5            | 3.91 | 4.27 | 3.35 |
| ART5               | 3.91 | 4.20 | 3.70 |
| ZNF541             | 3.91 | 4.18 | 3.59 |
| TPGS1              | 3.91 | 4.51 | 3.40 |
| ZBED2              | 3.91 | 4.31 | 3.15 |
| PLEKHS1            | 3.91 | 4.58 | 3.64 |
| FGB                | 3.91 | 4.31 | 3.65 |
| OTTHUMG00000179141 | 3.91 | 4.33 | 3.25 |
| NBPF18P            | 3.91 | 4.62 | 3.34 |
| OTTHUMG00000153146 | 3.91 | 4.67 | 3.36 |
| PPP1R9A            | 3.91 | 4.31 | 3.23 |
| C11orf71           | 3.91 | 4.51 | 3.52 |
| CSMD1              | 3.91 | 4.27 | 3.66 |
| GTF2E1             | 3.91 | 4.44 | 3.50 |

|                     |      |      |      |
|---------------------|------|------|------|
| OTTHUMG00000018491  | 3.91 | 4.23 | 3.62 |
| ARHGEF26-AS1        | 3.91 | 4.68 | 3.52 |
| ZIC4                | 3.91 | 4.28 | 3.59 |
| LOC100126784        | 3.91 | 4.22 | 3.60 |
| TMEM95              | 3.91 | 4.57 | 3.66 |
| OTTHUMG000000163330 | 3.91 | 4.17 | 3.72 |
| OR6B1               | 3.91 | 4.20 | 3.65 |
| GJA10               | 3.91 | 4.69 | 3.41 |
| KCNG4               | 3.91 | 4.33 | 3.41 |
| LOC100287808        | 3.91 | 4.18 | 3.65 |
| C11orf44            | 3.91 | 4.45 | 3.55 |
| NUP210              | 3.91 | 4.15 | 3.39 |
| TRBV7-7             | 3.91 | 4.62 | 2.87 |
| CD1E                | 3.91 | 4.54 | 3.35 |
| HGC6.3              | 3.91 | 4.19 | 3.57 |
| XKR9                | 3.91 | 4.17 | 3.60 |
| IL1RN               | 3.91 | 4.62 | 3.52 |
| OTTHUMG000000170885 | 3.91 | 4.71 | 3.35 |
| TECTB               | 3.91 | 4.18 | 3.59 |
| MYH13               | 3.90 | 4.47 | 3.59 |
| OTTHUMG000000156038 | 3.90 | 4.25 | 3.47 |
| FLJ21408            | 3.90 | 4.69 | 3.51 |
| ZNF214              | 3.90 | 4.46 | 3.62 |
| OTTHUMG000000171832 | 3.90 | 4.28 | 3.53 |
| FAM228A             | 3.90 | 4.36 | 3.47 |
| LPHN3               | 3.90 | 4.63 | 3.53 |
| KIAA1644            | 3.90 | 4.85 | 3.52 |
| OTTHUMG000000171178 | 3.90 | 4.60 | 3.33 |
| TAGLN3              | 3.90 | 4.35 | 3.50 |
| NRAP                | 3.90 | 4.37 | 3.54 |
| RGS20               | 3.90 | 4.34 | 3.40 |
| TMEM201             | 3.90 | 4.40 | 3.41 |
| LUCAT1              | 3.90 | 4.28 | 3.59 |
| LOC727982           | 3.90 | 4.31 | 3.53 |
| ABCC2               | 3.90 | 4.47 | 3.55 |
| LOC100131047        | 3.90 | 4.29 | 3.56 |
| LOC93463            | 3.90 | 4.28 | 3.57 |
| KRTAP3-2            | 3.90 | 4.55 | 3.39 |
| BCL11B              | 3.90 | 4.37 | 3.57 |
| HSPB9               | 3.90 | 4.35 | 3.55 |
| SPATA2              | 3.90 | 4.22 | 3.36 |
| LOC649133           | 3.90 | 4.61 | 3.51 |
| ELOVL6              | 3.90 | 4.61 | 3.65 |
| ZNF720              | 3.90 | 4.19 | 3.62 |
| RPLP0P2             | 3.90 | 4.28 | 3.70 |
| TSNAXIP1            | 3.90 | 4.15 | 3.57 |
| C1orf101            | 3.90 | 4.32 | 3.56 |
| GCLM                | 3.90 | 4.75 | 3.09 |
| OTTHUMG00000036265  | 3.90 | 4.17 | 3.59 |

|                    |      |      |      |
|--------------------|------|------|------|
| CD101              | 3.90 | 4.21 | 3.61 |
| ZNF689             | 3.90 | 4.67 | 3.41 |
| FRMD7              | 3.90 | 4.34 | 3.55 |
| LOC339568          | 3.90 | 4.41 | 3.46 |
| ALOX12B            | 3.90 | 4.17 | 3.52 |
| MIR488             | 3.90 | 4.87 | 3.17 |
| ALLC               | 3.90 | 4.57 | 3.52 |
| IGKV2-40           | 3.90 | 4.29 | 3.63 |
| CTSG               | 3.90 | 4.52 | 3.52 |
| ZNF619             | 3.90 | 4.45 | 3.35 |
| NAT1               | 3.90 | 4.11 | 3.52 |
| PRSS12             | 3.90 | 4.34 | 3.39 |
| TTY1B              | 3.90 | 4.32 | 3.50 |
| OTTHUMG00000164945 | 3.90 | 4.66 | 3.48 |
| ZDHHC8P1           | 3.90 | 4.48 | 3.21 |
| FGFBP1             | 3.90 | 4.22 | 3.36 |
| EDAR               | 3.90 | 4.37 | 3.35 |
| LOC348817          | 3.90 | 4.19 | 3.45 |
| NHLRC4             | 3.90 | 4.30 | 3.47 |
| RNA5SP374          | 3.90 | 4.92 | 3.23 |
| POTEH              | 3.90 | 4.40 | 3.28 |
| LINC00221          | 3.90 | 4.03 | 3.76 |
| LACE1              | 3.90 | 4.23 | 3.57 |
| FANCE              | 3.90 | 4.24 | 3.61 |
| OTTHUMG00000155481 | 3.90 | 4.41 | 3.30 |
| LPAR3              | 3.90 | 4.29 | 3.49 |
| ZNF556             | 3.90 | 4.13 | 3.38 |
| LINC00636          | 3.90 | 4.26 | 3.61 |
| ATP6VOA4           | 3.90 | 4.39 | 3.29 |
| ARR3               | 3.90 | 4.11 | 3.55 |
| IFNL2              | 3.90 | 4.45 | 3.30 |
| OTTHUMG00000162606 | 3.90 | 4.85 | 3.45 |
| SNORA37            | 3.90 | 4.37 | 3.49 |
| LOC100128840       | 3.90 | 4.32 | 3.45 |
| PRLHR              | 3.89 | 4.40 | 3.57 |
| SCGB2B2            | 3.89 | 4.30 | 3.49 |
| TMEM8C             | 3.89 | 4.29 | 3.28 |
| LOC101060103       | 3.89 | 4.59 | 3.25 |
| NLRP12             | 3.89 | 4.34 | 3.48 |
| MARS2              | 3.89 | 4.34 | 3.65 |
| LOC100130539       | 3.89 | 4.42 | 3.38 |
| LOC285972          | 3.89 | 4.51 | 3.35 |
| LCN1               | 3.89 | 4.40 | 3.31 |
| LOC100506025       | 3.89 | 4.01 | 3.68 |
| RNA5SP152          | 3.89 | 4.44 | 3.22 |
| OTTHUMG00000163124 | 3.89 | 4.39 | 3.24 |
| OR9Q2              | 3.89 | 4.64 | 3.37 |
| PRR5-ARHGAP8       | 3.89 | 4.29 | 3.56 |
| DBF4               | 3.89 | 4.59 | 3.58 |

|                    |      |      |      |
|--------------------|------|------|------|
| NUAK2              | 3.89 | 4.50 | 3.67 |
| OTTHUMG00000132826 | 3.89 | 4.79 | 3.42 |
| MIR521-2           | 3.89 | 4.85 | 3.14 |
| SBK2               | 3.89 | 4.20 | 3.47 |
| ZNF616             | 3.89 | 4.35 | 3.53 |
| OTTHUMG00000164860 | 3.89 | 4.34 | 3.26 |
| KCNK13             | 3.89 | 4.11 | 3.44 |
| LOC728805          | 3.89 | 4.57 | 3.36 |
| DUXA               | 3.89 | 4.20 | 3.57 |
| OTTHUMG00000035690 | 3.89 | 4.61 | 3.39 |
| ARHGEF37           | 3.89 | 4.24 | 3.53 |
| CALB2              | 3.89 | 4.40 | 3.37 |
| DMD-AS2            | 3.89 | 4.16 | 3.62 |
| DEPDC7             | 3.89 | 4.44 | 3.52 |
| CCDC61             | 3.89 | 4.64 | 3.48 |
| HPD                | 3.89 | 4.30 | 3.58 |
| FLJ30838           | 3.89 | 4.21 | 3.55 |
| ITIH2              | 3.89 | 4.67 | 3.46 |
| OTTHUMG00000160485 | 3.89 | 4.65 | 3.61 |
| ZNF674             | 3.89 | 4.19 | 3.37 |
| GFRA4              | 3.89 | 4.42 | 3.53 |
| FLJ43879           | 3.89 | 4.39 | 3.29 |
| MIR4474            | 3.89 | 4.28 | 3.59 |
| NIPA1              | 3.89 | 4.96 | 2.59 |
| MREG               | 3.89 | 4.04 | 3.68 |
| THRB-AS1           | 3.89 | 4.68 | 3.29 |
| TTY2               | 3.89 | 4.84 | 3.22 |
| SKP1               | 3.89 | 4.27 | 3.29 |
| C2orf73            | 3.89 | 4.51 | 3.53 |
| LYPD1              | 3.89 | 4.23 | 3.45 |
| PRR23A             | 3.89 | 4.53 | 3.42 |
| MIR3123            | 3.89 | 4.08 | 3.16 |
| LINC00675          | 3.89 | 4.65 | 3.51 |
| OTTHUMG00000162485 | 3.89 | 4.38 | 3.55 |
| TMEM255A           | 3.89 | 4.62 | 3.38 |
| LINC00849          | 3.89 | 4.69 | 2.78 |
| OTTHUMG00000155987 | 3.89 | 4.15 | 3.60 |
| RHOXF2             | 3.89 | 4.36 | 3.45 |
| EGFR-AS1           | 3.89 | 4.56 | 3.44 |
| SCN5A              | 3.89 | 4.16 | 3.53 |
| LOC100292922       | 3.89 | 4.91 | 2.66 |
| HOTAIR             | 3.89 | 4.24 | 3.36 |
| MB                 | 3.89 | 4.37 | 3.14 |
| IGKV6-21           | 3.89 | 4.45 | 3.38 |
| ELAVL4             | 3.89 | 4.27 | 3.43 |
| DYRK4              | 3.89 | 4.09 | 3.70 |
| OTTHUMG00000167401 | 3.89 | 4.33 | 3.53 |
| OTTHUMG00000152568 | 3.89 | 4.24 | 3.27 |
| EXO1               | 3.89 | 4.26 | 3.56 |

|                    |      |      |      |
|--------------------|------|------|------|
| LOC100507435       | 3.89 | 4.44 | 3.37 |
| OVCH1-AS1          | 3.89 | 4.45 | 3.41 |
| RNA5SP483          | 3.88 | 4.65 | 2.86 |
| LOC729574          | 3.88 | 4.31 | 3.55 |
| FGF3               | 3.88 | 4.41 | 3.62 |
| HTR3B              | 3.88 | 4.35 | 3.48 |
| OTTHUMG00000161885 | 3.88 | 4.64 | 3.05 |
| MAP3K15            | 3.88 | 4.14 | 3.32 |
| CLC                | 3.88 | 4.95 | 3.32 |
| IGF2BP1            | 3.88 | 4.22 | 3.54 |
| TMEM174            | 3.88 | 4.33 | 3.45 |
| C11orf53           | 3.88 | 4.17 | 3.69 |
| SLC12A7            | 3.88 | 4.42 | 3.28 |
| OR51J1             | 3.88 | 4.61 | 3.29 |
| OTTHUMG00000166090 | 3.88 | 4.20 | 3.30 |
| PAEP               | 3.88 | 4.41 | 3.29 |
| HLA-DRB5           | 3.88 | 7.66 | 2.03 |
| MIR581             | 3.88 | 4.51 | 2.97 |
| OTTHUMG00000161875 | 3.88 | 4.41 | 3.18 |
| CENPK              | 3.88 | 4.81 | 3.19 |
| ARAP2              | 3.88 | 4.40 | 3.54 |
| GJB1               | 3.88 | 4.09 | 3.70 |
| WDR63              | 3.88 | 4.23 | 3.49 |
| PARP15             | 3.88 | 4.67 | 3.50 |
| OTTHUMG00000015667 | 3.88 | 4.32 | 3.52 |
| GSTCD              | 3.88 | 4.45 | 3.49 |
| A2MP1              | 3.88 | 4.48 | 3.43 |
| MROH2A             | 3.88 | 4.20 | 3.62 |
| THAP9              | 3.88 | 4.18 | 3.61 |
| FLJ37453           | 3.88 | 4.41 | 3.05 |
| ECT2L              | 3.88 | 4.11 | 3.62 |
| LOC100509445       | 3.88 | 4.19 | 3.53 |
| CENPI              | 3.88 | 4.74 | 3.20 |
| NTRK3              | 3.88 | 4.39 | 3.59 |
| ZNF391             | 3.88 | 4.20 | 3.44 |
| LOC100507351       | 3.88 | 4.35 | 3.47 |
| KNSTRN             | 3.88 | 4.24 | 3.53 |
| FLJ45721           | 3.88 | 4.64 | 3.32 |
| NMBR               | 3.88 | 4.26 | 3.60 |
| AOX2P              | 3.88 | 4.28 | 3.42 |
| GNMT               | 3.88 | 4.04 | 3.60 |
| KCNA7              | 3.88 | 4.23 | 3.59 |
| UCP3               | 3.88 | 4.13 | 3.61 |
| SGOL1              | 3.88 | 4.45 | 3.55 |
| SLITRK4            | 3.88 | 4.31 | 3.55 |
| OTTHUMG00000171360 | 3.88 | 4.18 | 3.65 |
| CD200R1            | 3.88 | 4.49 | 3.30 |
| OR2A2              | 3.88 | 4.68 | 2.67 |
| EIF1B-AS1          | 3.88 | 4.35 | 2.96 |

|                    |      |      |      |
|--------------------|------|------|------|
| OTTHUMG00000008359 | 3.88 | 4.48 | 3.35 |
| OTTHUMG00000176976 | 3.88 | 4.21 | 3.60 |
| GBP6               | 3.88 | 4.76 | 3.34 |
| OTTHUMG00000163615 | 3.88 | 4.35 | 3.44 |
| IPCEF1             | 3.88 | 4.54 | 3.56 |
| FRMD1              | 3.88 | 4.57 | 3.42 |
| OTTHUMG00000168001 | 3.88 | 4.32 | 3.15 |
| LOC100506351       | 3.88 | 4.46 | 3.22 |
| MLLT4-AS1          | 3.88 | 4.20 | 3.36 |
| ID4                | 3.88 | 4.84 | 3.31 |
| ITGA8              | 3.88 | 4.38 | 3.52 |
| LOC440337          | 3.88 | 4.29 | 2.99 |
| SYNPO2             | 3.88 | 5.02 | 2.58 |
| MFAP3L             | 3.88 | 4.43 | 3.07 |
| LOC100996348       | 3.88 | 4.41 | 3.18 |
| OTTHUMG00000031895 | 3.88 | 4.41 | 3.62 |
| SPINK9             | 3.88 | 4.43 | 3.39 |
| OTTHUMG00000171877 | 3.88 | 4.39 | 3.40 |
| C11orf89           | 3.87 | 4.56 | 3.42 |
| COCH               | 3.87 | 4.09 | 3.65 |
| OTTHUMG00000177262 | 3.87 | 4.37 | 3.15 |
| OTTHUMG00000168261 | 3.87 | 4.12 | 3.53 |
| LOC100507267       | 3.87 | 4.09 | 3.64 |
| GRB7               | 3.87 | 4.30 | 3.45 |
| TNNI3              | 3.87 | 4.41 | 3.40 |
| PRSS16             | 3.87 | 4.53 | 3.54 |
| PLCXD3             | 3.87 | 4.23 | 3.58 |
| RNA5SP441          | 3.87 | 4.65 | 2.97 |
| TRIM7              | 3.87 | 4.22 | 3.26 |
| GDPD4              | 3.87 | 4.46 | 3.23 |
| FAM47B             | 3.87 | 4.30 | 3.27 |
| PBK                | 3.87 | 5.11 | 2.95 |
| OTTHUMG00000172597 | 3.87 | 4.54 | 3.22 |
| RNA5SP460          | 3.87 | 4.20 | 3.35 |
| TUSC7              | 3.87 | 4.05 | 3.70 |
| OTTHUMG00000154835 | 3.87 | 4.25 | 3.23 |
| TNP1               | 3.87 | 4.53 | 3.25 |
| GNAT1              | 3.87 | 4.44 | 3.26 |
| MEP1B              | 3.87 | 4.40 | 3.38 |
| CELSR1             | 3.87 | 4.13 | 3.56 |
| DBIL5P             | 3.87 | 4.20 | 3.38 |
| COL6A4P2           | 3.87 | 4.23 | 3.45 |
| GSDMC              | 3.87 | 4.23 | 3.46 |
| ZSCAN16            | 3.87 | 4.80 | 3.35 |
| AZGP1              | 3.87 | 4.72 | 3.15 |
| FUT9               | 3.87 | 4.15 | 3.57 |
| EPHA10             | 3.87 | 4.12 | 3.55 |
| VSNL1              | 3.87 | 4.40 | 3.60 |
| TAAR3              | 3.87 | 4.78 | 3.39 |

|                    |      |      |      |
|--------------------|------|------|------|
| NKAIN2             | 3.87 | 4.46 | 3.25 |
| NKAPL              | 3.87 | 4.03 | 3.59 |
| CHRNA9             | 3.87 | 4.28 | 3.10 |
| SMIM2-AS1          | 3.87 | 4.38 | 3.26 |
| OTTHUMG00000158223 | 3.87 | 4.23 | 3.66 |
| DEFB132            | 3.87 | 4.20 | 3.45 |
| KRT6A              | 3.87 | 4.78 | 3.11 |
| OTTHUMG00000037935 | 3.87 | 4.47 | 3.31 |
| LINC00906          | 3.87 | 4.33 | 3.38 |
| XCL1               | 3.87 | 4.46 | 3.30 |
| SLC26A4-AS1        | 3.87 | 4.21 | 3.52 |
| TMTC4              | 3.87 | 4.33 | 3.57 |
| TTC40              | 3.87 | 4.23 | 3.60 |
| ENO3               | 3.87 | 4.28 | 3.38 |
| NLGN4X             | 3.87 | 4.18 | 3.38 |
| MGC42157           | 3.87 | 4.22 | 3.39 |
| MTL5               | 3.87 | 4.14 | 3.72 |
| LOC401463          | 3.87 | 4.47 | 3.48 |
| OR4M1              | 3.87 | 4.36 | 3.47 |
| OTTHUMG00000165726 | 3.87 | 4.16 | 3.31 |
| OR52J3             | 3.87 | 4.27 | 3.30 |
| OR6C4              | 3.87 | 4.21 | 3.53 |
| CABP1              | 3.87 | 4.48 | 3.49 |
| OTTHUMG00000017564 | 3.87 | 4.11 | 3.55 |
| NUDT4              | 3.87 | 4.34 | 3.55 |
| KRTAP5-10          | 3.87 | 4.39 | 3.22 |
| KCNJ11             | 3.87 | 4.31 | 3.40 |
| CCR10              | 3.87 | 4.33 | 3.42 |
| RNA5SP124          | 3.87 | 5.22 | 3.09 |
| CLEC17A            | 3.87 | 4.34 | 3.21 |
| MGC45800           | 3.87 | 4.17 | 3.64 |
| KLF15              | 3.87 | 4.39 | 3.35 |
| LOC100288181       | 3.87 | 4.13 | 3.29 |
| RENBP              | 3.87 | 4.20 | 3.34 |
| IGLV4-69           | 3.87 | 4.37 | 3.37 |
| GLYCTK             | 3.87 | 4.10 | 3.67 |
| LILRA1             | 3.87 | 4.25 | 3.43 |
| TMC1               | 3.86 | 4.20 | 3.39 |
| TFAP2C             | 3.86 | 4.20 | 3.42 |
| OTTHUMG00000014691 | 3.86 | 4.39 | 3.17 |
| LOC143188          | 3.86 | 4.33 | 3.32 |
| GTSF1              | 3.86 | 4.59 | 3.49 |
| MIR598             | 3.86 | 4.57 | 2.98 |
| LOC100506172       | 3.86 | 4.22 | 3.53 |
| OTTHUMG00000164197 | 3.86 | 4.55 | 3.15 |
| CENPN              | 3.86 | 4.46 | 3.46 |
| SLC38A4            | 3.86 | 4.65 | 2.88 |
| FOXA1              | 3.86 | 4.29 | 3.45 |
| CCNYL2             | 3.86 | 4.51 | 2.45 |



|                    |      |      |      |
|--------------------|------|------|------|
| LINC00928          | 3.86 | 4.17 | 3.15 |
| GPR111             | 3.86 | 4.54 | 3.28 |
| RPSAP9             | 3.86 | 4.25 | 3.24 |
| OTTHUMG00000171195 | 3.86 | 4.44 | 3.17 |
| ACAA1              | 3.86 | 4.07 | 3.56 |
| RNF157-AS1         | 3.86 | 4.39 | 3.51 |
| DRP2               | 3.86 | 4.32 | 3.47 |
| PTCHD2             | 3.86 | 4.20 | 3.50 |
| CACNA1D            | 3.86 | 4.31 | 3.33 |
| DNAH17             | 3.86 | 4.36 | 3.61 |
| MCM10              | 3.86 | 4.22 | 3.48 |
| LCE5A              | 3.86 | 4.94 | 3.36 |
| ARSH               | 3.86 | 4.07 | 3.54 |
| IL37               | 3.86 | 4.30 | 3.39 |
| CEP19              | 3.86 | 4.37 | 3.34 |
| OR51F2             | 3.86 | 4.79 | 2.97 |
| DDX25              | 3.86 | 4.35 | 3.48 |
| OTTHUMG00000171355 | 3.86 | 4.49 | 3.54 |
| PLK5               | 3.86 | 4.48 | 3.46 |
| C9orf171           | 3.86 | 4.12 | 3.60 |
| MPP4               | 3.86 | 4.20 | 3.52 |
| FRAS1              | 3.86 | 4.31 | 3.45 |
| OTTHUMG00000158954 | 3.86 | 4.26 | 3.41 |
| OTTHUMG00000015980 | 3.86 | 4.36 | 3.10 |
| TSPAN9-IT1         | 3.86 | 4.55 | 3.47 |
| CSN3               | 3.86 | 4.34 | 3.27 |
| OTTHUMG00000156022 | 3.86 | 4.50 | 3.32 |
| MAB21L1            | 3.86 | 4.16 | 3.52 |
| LOC344887          | 3.86 | 4.31 | 3.10 |
| CYP4F3             | 3.86 | 4.36 | 3.45 |
| NYAP2              | 3.86 | 4.37 | 3.34 |
| ASRGL1             | 3.86 | 4.23 | 3.53 |
| PSTPIP2            | 3.86 | 4.29 | 3.30 |
| OTTHUMG00000140109 | 3.86 | 4.38 | 3.14 |
| OTTHUMG00000163905 | 3.86 | 4.67 | 3.16 |
| LOC149351          | 3.86 | 4.25 | 3.46 |
| CDH17              | 3.86 | 4.38 | 3.44 |
| OTTHUMG00000162518 | 3.86 | 4.29 | 3.27 |
| STPG1              | 3.86 | 4.34 | 3.44 |
| TSPY2              | 3.86 | 5.11 | 2.22 |
| SYT1               | 3.86 | 4.19 | 3.38 |
| RNY4P4             | 3.86 | 4.61 | 3.11 |
| POTEB2             | 3.86 | 4.46 | 3.22 |
| TSSK6              | 3.86 | 4.08 | 3.55 |
| LOC414300          | 3.86 | 4.49 | 3.42 |
| RBMXL2             | 3.86 | 4.16 | 3.46 |
| OTTHUMG00000021313 | 3.86 | 4.84 | 3.29 |
| LOC100506422       | 3.86 | 4.40 | 3.58 |
| LOC284344          | 3.85 | 4.64 | 3.39 |

|                    |      |      |      |
|--------------------|------|------|------|
| OTTHUMG00000150956 | 3.85 | 4.30 | 3.28 |
| P2RY1              | 3.85 | 4.40 | 3.45 |
| GK                 | 3.85 | 4.68 | 3.03 |
| GSG2               | 3.85 | 4.44 | 3.40 |
| LINC00861          | 3.85 | 4.43 | 3.40 |
| MLF1               | 3.85 | 4.68 | 3.18 |
| OTTHUMG00000154969 | 3.85 | 4.47 | 3.28 |
| RGS1               | 3.85 | 4.90 | 2.94 |
| MORN3              | 3.85 | 4.35 | 3.41 |
| LINC00162          | 3.85 | 4.32 | 3.25 |
| MYH6               | 3.85 | 4.18 | 3.54 |
| PMP2               | 3.85 | 4.44 | 3.23 |
| BANF2              | 3.85 | 4.39 | 3.48 |
| LOC100287792       | 3.85 | 4.19 | 3.27 |
| PRKAG2-AS1         | 3.85 | 4.46 | 3.36 |
| DUSP5              | 3.85 | 4.30 | 3.43 |
| PRSS41             | 3.85 | 4.37 | 3.24 |
| OTTHUMG00000016489 | 3.85 | 4.57 | 2.52 |
| OR10H3             | 3.85 | 4.71 | 3.37 |
| ST6GALNAC1         | 3.85 | 4.66 | 3.42 |
| SPATA31B1          | 3.85 | 4.38 | 3.37 |
| OTTHUMG00000020070 | 3.85 | 4.25 | 3.45 |
| OTTHUMG00000018994 | 3.85 | 4.35 | 3.50 |
| MIR4804            | 3.85 | 4.21 | 3.42 |
| HS3ST3B1           | 3.85 | 4.50 | 3.27 |
| OTTHUMG00000014768 | 3.85 | 4.24 | 3.35 |
| OTTHUMG00000162516 | 3.85 | 4.51 | 3.09 |
| WBP2NL             | 3.85 | 4.06 | 3.54 |
| MYLK-AS2           | 3.85 | 4.23 | 3.44 |
| UBASH3A            | 3.85 | 4.19 | 3.49 |
| LOC283854          | 3.85 | 4.31 | 3.54 |
| OTTHUMG00000169663 | 3.85 | 4.75 | 3.22 |
| PIGR               | 3.85 | 4.23 | 3.39 |
| GRIN1              | 3.85 | 4.07 | 3.67 |
| KCNH1              | 3.85 | 4.35 | 3.42 |
| CAMKK1             | 3.85 | 4.23 | 3.48 |
| DCAF13             | 3.85 | 4.70 | 3.09 |
| DBIL5P2            | 3.85 | 4.36 | 3.49 |
| FOXR2              | 3.85 | 4.66 | 3.42 |
| ZNF429             | 3.85 | 4.48 | 3.17 |
| MIR181A2HG         | 3.85 | 4.37 | 3.04 |
| WDR66              | 3.85 | 4.25 | 3.41 |
| OTTHUMG00000171321 | 3.85 | 4.17 | 3.51 |
| LOC284561          | 3.85 | 4.25 | 3.17 |
| MIR193A            | 3.85 | 4.45 | 3.14 |
| OTTHUMG00000153094 | 3.85 | 4.11 | 3.46 |
| HIGD1C             | 3.85 | 4.10 | 3.62 |
| IL21R-AS1          | 3.85 | 4.32 | 3.35 |
| OTTHUMG00000032077 | 3.85 | 4.32 | 3.25 |

|                    |      |      |      |
|--------------------|------|------|------|
| OTTHUMG00000151726 | 3.85 | 4.72 | 3.15 |
| LEF1-AS1           | 3.85 | 4.25 | 3.38 |
| TUBA3C             | 3.85 | 4.55 | 3.11 |
| LHFPL3-AS1         | 3.85 | 4.15 | 3.54 |
| NMRK2              | 3.85 | 4.20 | 3.38 |
| UBE2QL1            | 3.85 | 4.32 | 3.43 |
| RNU7-2P            | 3.85 | 4.74 | 2.84 |
| LOC100506476       | 3.85 | 4.49 | 3.12 |
| ZNF549             | 3.85 | 4.31 | 3.17 |
| MRVI1-AS1          | 3.85 | 4.38 | 3.27 |
| KCNAB3             | 3.85 | 4.30 | 3.38 |
| C12orf42           | 3.85 | 4.16 | 3.64 |
| CLEC4E             | 3.85 | 4.27 | 3.19 |
| CYCS               | 3.85 | 4.59 | 3.42 |
| LOC730811          | 3.85 | 4.21 | 3.54 |
| EPM2A              | 3.84 | 4.10 | 3.46 |
| FMO2               | 3.84 | 4.88 | 2.83 |
| PTH2R              | 3.84 | 4.62 | 3.47 |
| OSM                | 3.84 | 4.08 | 3.44 |
| SNRPD2P2           | 3.84 | 4.25 | 3.62 |
| NEFH               | 3.84 | 4.22 | 3.54 |
| ZBTB42             | 3.84 | 4.36 | 3.59 |
| TMEM121            | 3.84 | 4.64 | 3.29 |
| SLAMF1             | 3.84 | 4.20 | 3.52 |
| LINC00638          | 3.84 | 4.33 | 3.32 |
| OIT3               | 3.84 | 4.52 | 3.36 |
| RAB19              | 3.84 | 4.38 | 3.36 |
| OTTHUMG00000184016 | 3.84 | 4.19 | 3.51 |
| TRHDE              | 3.84 | 4.78 | 3.15 |
| OTTHUMG00000020208 | 3.84 | 4.26 | 3.48 |
| LCE1A              | 3.84 | 4.81 | 2.99 |
| PCCA-AS1           | 3.84 | 4.26 | 3.52 |
| TIPARP-AS1         | 3.84 | 4.41 | 3.29 |
| CASQ2              | 3.84 | 4.75 | 3.25 |
| LOC100509621       | 3.84 | 4.05 | 3.03 |
| MAST1              | 3.84 | 4.16 | 3.39 |
| OTTHUMG00000169024 | 3.84 | 4.29 | 3.22 |
| NXPH2              | 3.84 | 4.29 | 3.44 |
| MSX2P1             | 3.84 | 4.56 | 3.25 |
| SAA2               | 3.84 | 4.23 | 3.31 |
| KIF15              | 3.84 | 4.26 | 3.55 |
| ZNF17              | 3.84 | 4.37 | 3.46 |
| GIP                | 3.84 | 4.40 | 3.18 |
| SMCO3              | 3.84 | 4.26 | 3.61 |
| ICAM4              | 3.84 | 4.19 | 3.61 |
| ZSCAN12            | 3.84 | 4.40 | 3.41 |
| SLC25A31           | 3.84 | 4.36 | 3.38 |
| SCGB3A2            | 3.84 | 4.53 | 3.24 |
| NALCN              | 3.84 | 4.28 | 3.52 |

|                    |      |      |      |
|--------------------|------|------|------|
| CHP2               | 3.84 | 4.22 | 3.41 |
| GPR137C            | 3.84 | 4.48 | 3.42 |
| FRRS1L             | 3.84 | 4.23 | 3.22 |
| MIR424             | 3.84 | 4.13 | 3.74 |
| LINC00158          | 3.84 | 4.44 | 3.33 |
| OTTHUMG00000032103 | 3.84 | 4.34 | 3.44 |
| FBXW4P1            | 3.84 | 4.48 | 3.06 |
| OTTHUMG00000086763 | 3.84 | 4.38 | 3.51 |
| TMPRSS6            | 3.84 | 4.47 | 3.44 |
| LINC00515          | 3.84 | 4.63 | 3.06 |
| LCE3D              | 3.84 | 4.42 | 3.41 |
| OTTHUMG00000034556 | 3.84 | 4.36 | 3.56 |
| AGBL2              | 3.83 | 4.43 | 3.32 |
| OTTHUMG00000165790 | 3.83 | 4.43 | 3.39 |
| CNTNAP5            | 3.83 | 4.31 | 3.12 |
| LINC00312          | 3.83 | 4.45 | 3.18 |
| LINC00606          | 3.83 | 4.36 | 3.39 |
| COL28A1            | 3.83 | 4.39 | 3.41 |
| LOC389602          | 3.83 | 4.14 | 3.58 |
| PNLDC1             | 3.83 | 4.23 | 3.53 |
| LOC402779          | 3.83 | 4.38 | 3.03 |
| NAT8L              | 3.83 | 4.29 | 3.41 |
| MIR302D            | 3.83 | 4.35 | 3.28 |
| AKT3-IT1           | 3.83 | 4.24 | 3.40 |
| MAN1B1-AS1         | 3.83 | 4.17 | 3.36 |
| LOC283682          | 3.83 | 4.34 | 3.45 |
| DBX1               | 3.83 | 4.19 | 3.10 |
| SPTSSB             | 3.83 | 5.00 | 2.60 |
| GLP2R              | 3.83 | 4.09 | 3.56 |
| LOC339822          | 3.83 | 4.08 | 3.43 |
| CCDC106            | 3.83 | 4.25 | 3.44 |
| MIR4784            | 3.83 | 4.22 | 2.97 |
| KCNIP4             | 3.83 | 4.11 | 3.42 |
| GPR85              | 3.83 | 3.98 | 3.69 |
| TGM7               | 3.83 | 4.39 | 3.33 |
| TBX22              | 3.83 | 4.36 | 3.42 |
| RPL13A             | 3.83 | 4.27 | 3.18 |
| FLJ42842           | 3.83 | 4.56 | 3.32 |
| SKCG-1             | 3.83 | 4.43 | 3.40 |
| FAM209A            | 3.83 | 4.48 | 2.90 |
| SNORA34            | 3.83 | 4.30 | 3.48 |
| OTTHUMG00000170068 | 3.83 | 4.60 | 3.24 |
| IQCF3              | 3.83 | 4.21 | 3.49 |
| LOC150935          | 3.83 | 4.33 | 3.50 |
| MIR3174            | 3.83 | 4.48 | 3.21 |
| ERBB4              | 3.83 | 4.17 | 3.20 |
| OTTHUMG00000001769 | 3.83 | 4.29 | 3.53 |
| LOC100292073       | 3.83 | 4.20 | 3.53 |
| REEP1              | 3.83 | 4.54 | 3.30 |

|                    |      |      |      |
|--------------------|------|------|------|
| STEAP2-AS1         | 3.83 | 4.49 | 3.41 |
| LYPD6              | 3.83 | 4.58 | 3.42 |
| TBX1               | 3.83 | 4.15 | 3.40 |
| GPR149             | 3.83 | 4.63 | 3.55 |
| RNA5SP341          | 3.83 | 4.50 | 3.36 |
| QRFPR              | 3.83 | 4.25 | 3.33 |
| KCNJ14             | 3.83 | 4.19 | 3.48 |
| SCG2               | 3.83 | 5.88 | 2.87 |
| EMB                | 3.82 | 4.49 | 3.14 |
| OTTHUMG0000008236  | 3.82 | 4.21 | 3.27 |
| OTTHUMG00000169474 | 3.82 | 4.33 | 3.23 |
| FCRL2              | 3.82 | 4.31 | 3.09 |
| OCNL               | 3.82 | 4.30 | 3.44 |
| LOC100996571       | 3.82 | 4.36 | 3.43 |
| MIR1251            | 3.82 | 4.28 | 3.49 |
| OTTHUMG00000152981 | 3.82 | 4.77 | 2.93 |
| RNA5SP295          | 3.82 | 5.06 | 2.46 |
| TRAJ11             | 3.82 | 4.88 | 3.38 |
| LOC339442          | 3.82 | 4.29 | 3.36 |
| MIR595             | 3.82 | 4.17 | 3.35 |
| AVP                | 3.82 | 4.34 | 3.39 |
| LOC730227          | 3.82 | 4.20 | 3.48 |
| OTTHUMG00000159018 | 3.82 | 4.26 | 3.50 |
| SCNN1G             | 3.82 | 4.13 | 3.29 |
| CDC20B             | 3.82 | 4.20 | 3.45 |
| MLK7-AS1           | 3.82 | 4.26 | 3.46 |
| LOC100506134       | 3.82 | 4.65 | 3.14 |
| EFHC2              | 3.82 | 4.22 | 3.22 |
| MIR518A2           | 3.82 | 4.62 | 3.25 |
| MTRNR2L1           | 3.82 | 4.72 | 3.29 |
| FENDDR             | 3.82 | 4.28 | 3.19 |
| SH3GL1P1           | 3.82 | 4.30 | 2.97 |
| BIK                | 3.82 | 4.11 | 3.52 |
| TIMM8A             | 3.82 | 4.21 | 3.12 |
| PPEF1              | 3.82 | 4.43 | 3.28 |
| OTTHUMG00000161365 | 3.82 | 4.26 | 3.46 |
| MIR4497            | 3.82 | 4.63 | 3.27 |
| CTNNA3             | 3.82 | 4.39 | 3.50 |
| USH1C              | 3.82 | 4.23 | 3.52 |
| LYSMD2             | 3.82 | 4.20 | 3.48 |
| ANKS1B             | 3.82 | 4.21 | 3.46 |
| GLUD2              | 3.82 | 4.73 | 3.29 |
| ANAPC1P1           | 3.82 | 4.36 | 3.30 |
| LOC401177          | 3.82 | 4.28 | 3.47 |
| LOC729348          | 3.82 | 4.07 | 3.47 |
| SLC26A1            | 3.82 | 4.20 | 3.38 |
| OTTHUMG00000172266 | 3.82 | 4.40 | 3.30 |
| RORB               | 3.82 | 4.06 | 3.52 |
| HSD17B6            | 3.82 | 4.27 | 3.38 |

|                    |      |      |      |
|--------------------|------|------|------|
| TMEM253            | 3.82 | 4.24 | 3.34 |
| LOC728024          | 3.82 | 4.24 | 3.39 |
| FSIP2              | 3.82 | 4.09 | 3.43 |
| SNORA13            | 3.82 | 4.32 | 3.05 |
| EGF                | 3.82 | 4.59 | 3.43 |
| SNORA70E           | 3.82 | 4.52 | 2.36 |
| MIR643             | 3.82 | 4.48 | 2.59 |
| OTTHUMG00000017871 | 3.82 | 4.66 | 3.19 |
| HMGCS2             | 3.82 | 4.17 | 3.48 |
| OTTHUMG00000170239 | 3.82 | 4.41 | 3.45 |
| CA10               | 3.82 | 4.27 | 3.21 |
| ZNF197-AS1         | 3.82 | 4.63 | 3.21 |
| OTTHUMG00000162992 | 3.82 | 4.20 | 3.27 |
| C17orf47           | 3.82 | 4.26 | 3.51 |
| LOC100507389       | 3.82 | 4.21 | 3.47 |
| LINC00924          | 3.82 | 4.35 | 3.34 |
| TNFSF4             | 3.82 | 4.88 | 3.20 |
| LOC100996578       | 3.81 | 4.45 | 3.11 |
| IL10               | 3.81 | 4.25 | 3.34 |
| SAMD12             | 3.81 | 4.21 | 3.45 |
| OTTHUMG00000017554 | 3.81 | 4.17 | 3.49 |
| TFAM               | 3.81 | 4.87 | 3.24 |
| OTTHUMG00000159201 | 3.81 | 4.51 | 3.33 |
| CPB2-AS1           | 3.81 | 4.29 | 3.22 |
| SCN11A             | 3.81 | 4.17 | 3.34 |
| TRBV6-6            | 3.81 | 4.23 | 3.60 |
| SLC25A21           | 3.81 | 4.26 | 3.34 |
| COL18A1-AS2        | 3.81 | 4.21 | 3.39 |
| MIR550A2           | 3.81 | 5.25 | 2.98 |
| GATM               | 3.81 | 4.42 | 2.98 |
| TMEM40             | 3.81 | 4.16 | 3.37 |
| C1orf195           | 3.81 | 4.32 | 3.41 |
| LRRC66             | 3.81 | 4.12 | 3.26 |
| HTR3D              | 3.81 | 4.72 | 3.30 |
| OTTHUMG00000002754 | 3.81 | 4.40 | 3.18 |
| RBPMS-AS1          | 3.81 | 4.23 | 3.13 |
| OTTHUMG00000162408 | 3.81 | 4.08 | 3.41 |
| LOC729059          | 3.81 | 4.38 | 3.40 |
| ELF5               | 3.81 | 4.34 | 3.30 |
| RNU5F-6P           | 3.81 | 4.62 | 2.91 |
| TMEM51-AS1         | 3.81 | 4.16 | 3.28 |
| MIR1237            | 3.81 | 4.42 | 2.78 |
| CEL                | 3.81 | 4.41 | 3.45 |
| PRKCQ              | 3.81 | 4.45 | 3.47 |
| OR4D10             | 3.81 | 4.77 | 2.80 |
| OTTHUMG00000001764 | 3.81 | 4.18 | 3.40 |
| LINC00845          | 3.81 | 4.17 | 3.20 |
| POU5F2             | 3.81 | 4.25 | 3.41 |
| SLC6A4             | 3.81 | 4.48 | 3.43 |

|                    |      |      |      |
|--------------------|------|------|------|
| TAS2R16            | 3.81 | 4.63 | 3.30 |
| OTTHUMG00000171197 | 3.81 | 4.31 | 3.44 |
| LOC100507670       | 3.81 | 4.33 | 2.99 |
| KCNJ5              | 3.81 | 4.21 | 3.53 |
| NKX2-1             | 3.81 | 4.11 | 3.56 |
| SOX2               | 3.81 | 4.08 | 3.36 |
| SMCO4              | 3.81 | 4.15 | 3.32 |
| OTTHUMG00000086827 | 3.81 | 4.23 | 3.42 |
| BEND4              | 3.81 | 4.12 | 3.44 |
| LOC100505795       | 3.81 | 4.29 | 3.18 |
| CERKL              | 3.81 | 4.43 | 3.54 |
| LINC00710          | 3.81 | 4.47 | 3.48 |
| OTTHUMG00000164547 | 3.81 | 4.31 | 3.18 |
| OTTHUMG00000037131 | 3.81 | 4.27 | 3.25 |
| OTTHUMG00000032809 | 3.81 | 4.37 | 3.26 |
| OTTHUMG00000018179 | 3.81 | 4.30 | 3.32 |
| C5orf34            | 3.81 | 4.30 | 3.47 |
| ZNF695             | 3.81 | 4.18 | 3.61 |
| HIST1H4A           | 3.81 | 4.37 | 3.34 |
| MIR206             | 3.80 | 4.35 | 2.99 |
| SUPT20HL2          | 3.80 | 4.21 | 3.34 |
| LOC100128176       | 3.80 | 4.14 | 3.38 |
| STAU2-AS1          | 3.80 | 4.22 | 3.40 |
| OTTHUMG00000010650 | 3.80 | 4.63 | 3.16 |
| NXN                | 3.80 | 4.12 | 3.41 |
| USP2               | 3.80 | 4.18 | 3.53 |
| HGF                | 3.80 | 4.44 | 3.36 |
| SYNDIG1L           | 3.80 | 4.69 | 3.27 |
| OTTHUMG00000172029 | 3.80 | 4.08 | 3.33 |
| KIRREL3-AS1        | 3.80 | 4.18 | 3.26 |
| NTRK3-AS1          | 3.80 | 4.18 | 3.42 |
| PDRG1              | 3.80 | 4.04 | 3.57 |
| AARD               | 3.80 | 3.97 | 3.59 |
| RHCG               | 3.80 | 4.10 | 3.61 |
| SCGB1D2            | 3.80 | 4.27 | 3.30 |
| OTTHUMG00000154666 | 3.80 | 4.44 | 3.25 |
| SELL               | 3.80 | 4.60 | 3.38 |
| C17orf66           | 3.80 | 4.19 | 3.29 |
| OR2A5              | 3.80 | 4.21 | 2.99 |
| ACSM1              | 3.80 | 4.28 | 3.15 |
| VWC2L-IT1          | 3.80 | 4.29 | 3.04 |
| SOWAHB             | 3.80 | 4.18 | 3.25 |
| NAP1L2             | 3.80 | 4.34 | 3.41 |
| C9orf116           | 3.80 | 4.11 | 3.51 |
| HABP2              | 3.80 | 4.17 | 3.41 |
| LOC285191          | 3.80 | 4.23 | 3.46 |
| RNA5SP304          | 3.80 | 4.14 | 3.20 |
| IGSF5              | 3.80 | 4.09 | 3.52 |
| KRT19P2            | 3.80 | 4.10 | 3.40 |

|                     |      |      |      |
|---------------------|------|------|------|
| FAM169B             | 3.80 | 4.01 | 3.49 |
| FLJ20444            | 3.80 | 4.48 | 3.14 |
| OTTHUMG00000154317  | 3.80 | 4.09 | 3.36 |
| LOC348761           | 3.80 | 4.49 | 3.06 |
| LOC101243545        | 3.80 | 4.09 | 3.44 |
| MIR542              | 3.80 | 4.67 | 2.97 |
| BMP10               | 3.80 | 4.24 | 3.17 |
| OTTHUMG00000152505  | 3.80 | 4.26 | 3.21 |
| OTTHUMG00000059903  | 3.80 | 4.65 | 3.45 |
| OTTHUMG00000151367  | 3.80 | 4.45 | 3.35 |
| LOC100506406        | 3.80 | 4.19 | 3.06 |
| ZRANB3              | 3.80 | 4.37 | 3.24 |
| OTTHUMG00000168462  | 3.80 | 4.25 | 3.31 |
| CYLC2               | 3.80 | 4.26 | 3.29 |
| ZNF671              | 3.80 | 4.26 | 3.19 |
| REG4                | 3.80 | 4.07 | 3.39 |
| OTTHUMG00000017625  | 3.80 | 4.16 | 3.27 |
| OTTHUMG00000162130  | 3.80 | 4.10 | 3.14 |
| OTTHUMG000000037934 | 3.80 | 4.44 | 3.46 |
| KRT17P2             | 3.80 | 4.64 | 2.84 |
| HGD                 | 3.80 | 4.15 | 3.56 |
| OTTHUMG00000015101  | 3.80 | 4.25 | 3.48 |
| RAD9B               | 3.80 | 4.51 | 3.21 |
| BEND3               | 3.80 | 4.23 | 3.50 |
| SVIP                | 3.80 | 4.24 | 3.42 |
| OTTHUMG00000168054  | 3.80 | 4.68 | 2.82 |
| OTTHUMG00000153145  | 3.80 | 4.28 | 3.26 |
| LOC100506384        | 3.80 | 4.60 | 3.06 |
| STAT4               | 3.80 | 4.09 | 3.42 |
| OTTHUMG000000032661 | 3.80 | 4.28 | 3.17 |
| BPIFB4              | 3.80 | 4.19 | 3.48 |
| CDH16               | 3.79 | 4.31 | 3.39 |
| LINC00958           | 3.79 | 4.32 | 3.20 |
| MIR202              | 3.79 | 4.16 | 3.38 |
| MIR518A1            | 3.79 | 4.56 | 3.40 |
| MIR125B2            | 3.79 | 4.40 | 3.29 |
| MIR519D             | 3.79 | 4.09 | 3.30 |
| OTTHUMG000000017341 | 3.79 | 4.30 | 3.46 |
| LILRB1              | 3.79 | 4.22 | 3.27 |
| PRAME               | 3.79 | 4.30 | 3.43 |
| LOC100506286        | 3.79 | 4.37 | 3.30 |
| IGFBP1              | 3.79 | 4.51 | 3.47 |
| OTTHUMG00000153092  | 3.79 | 4.12 | 3.35 |
| TTL8                | 3.79 | 4.27 | 3.53 |
| NAGPA-AS1           | 3.79 | 4.33 | 3.22 |
| MIR4540             | 3.79 | 4.66 | 3.30 |
| LOC100130458        | 3.79 | 4.37 | 3.24 |
| ZNF557              | 3.79 | 4.78 | 2.67 |
| OTTHUMG00000132241  | 3.79 | 4.38 | 3.31 |



|                    |      |      |      |
|--------------------|------|------|------|
| SRP14-AS1          | 3.79 | 4.04 | 3.58 |
| HOXD1              | 3.79 | 4.00 | 3.53 |
| TNNT1              | 3.79 | 4.37 | 3.23 |
| LGALS14            | 3.79 | 4.55 | 3.14 |
| LOC285627          | 3.79 | 4.39 | 3.31 |
| MIR1208            | 3.79 | 4.16 | 3.55 |
| ACOT11             | 3.79 | 4.06 | 3.53 |
| SIX1               | 3.79 | 4.24 | 3.26 |
| GRM8               | 3.79 | 4.13 | 3.54 |
| OTTHUMG00000178670 | 3.79 | 4.46 | 3.32 |
| LINC00608          | 3.79 | 4.26 | 3.51 |
| GINS2              | 3.79 | 4.11 | 3.39 |
| MIR30A             | 3.79 | 4.24 | 2.94 |
| PDE4C              | 3.79 | 4.15 | 3.37 |
| MTOR-AS1           | 3.79 | 4.60 | 3.01 |
| LOC100293962       | 3.79 | 4.24 | 3.32 |
| OTTHUMG00000037300 | 3.79 | 4.35 | 3.41 |
| FOXL2              | 3.79 | 4.17 | 3.31 |
| DGUOK-AS1          | 3.79 | 4.16 | 3.36 |
| GLTPD2             | 3.79 | 4.12 | 3.44 |
| KIT                | 3.79 | 4.69 | 3.03 |
| OTTHUMG00000015978 | 3.79 | 4.46 | 2.99 |
| OTTHUMG00000170371 | 3.79 | 4.55 | 3.29 |
| EIF3IP1            | 3.79 | 4.44 | 3.34 |
| OR10G7             | 3.79 | 4.52 | 3.28 |
| FLJ41278           | 3.79 | 4.19 | 3.39 |
| RNA5SP417          | 3.79 | 4.26 | 3.24 |
| OTTHUMG00000166508 | 3.79 | 4.17 | 3.56 |
| MYCNOS             | 3.79 | 4.25 | 3.38 |
| OTTHUMG00000164201 | 3.79 | 4.35 | 3.29 |
| LOC729681          | 3.79 | 4.18 | 3.37 |
| NKAIN1             | 3.79 | 4.26 | 3.24 |
| DMRT2              | 3.79 | 4.06 | 3.32 |
| CCDC41-AS1         | 3.79 | 4.43 | 3.29 |
| RNA5SP471          | 3.79 | 4.81 | 3.15 |
| GRIK1              | 3.79 | 4.11 | 3.37 |
| BPIFB1             | 3.79 | 4.17 | 3.46 |
| LOC100130673       | 3.79 | 4.33 | 3.45 |
| UBE2NL             | 3.78 | 4.75 | 3.34 |
| LOC100506885       | 3.78 | 4.24 | 3.50 |
| OR8A1              | 3.78 | 4.30 | 3.33 |
| DNAJC22            | 3.78 | 4.28 | 3.30 |
| OTTHUMG00000166544 | 3.78 | 4.36 | 3.39 |
| RHCE               | 3.78 | 4.22 | 2.97 |
| GBX1               | 3.78 | 4.12 | 3.35 |
| OTTHUMG00000066698 | 3.78 | 4.70 | 3.09 |
| OTTHUMG00000008077 | 3.78 | 4.29 | 3.47 |
| IL20RB             | 3.78 | 4.41 | 3.10 |
| IGBP1-AS1          | 3.78 | 4.49 | 3.23 |

|                    |      |      |      |
|--------------------|------|------|------|
| LINC00577          | 3.78 | 4.58 | 3.32 |
| LOC100422737       | 3.78 | 4.04 | 3.56 |
| LOC286359          | 3.78 | 4.25 | 3.52 |
| C21orf88           | 3.78 | 4.28 | 3.54 |
| LMOD3              | 3.78 | 4.77 | 3.34 |
| IGLV3-22           | 3.78 | 4.17 | 3.23 |
| LOC100288798       | 3.78 | 4.87 | 3.27 |
| JAKMIP3            | 3.78 | 4.36 | 3.43 |
| SLITRK1            | 3.78 | 4.50 | 3.19 |
| OTTHUMG00000154822 | 3.78 | 4.28 | 3.30 |
| SLC22A4            | 3.78 | 4.01 | 3.50 |
| SNRPG              | 3.78 | 4.48 | 3.27 |
| HIST1H2AA          | 3.78 | 4.54 | 2.99 |
| NOX1               | 3.78 | 4.03 | 3.47 |
| ADPGK-AS1          | 3.78 | 4.46 | 3.44 |
| B4GALT4-AS1        | 3.78 | 4.07 | 3.38 |
| MOG                | 3.78 | 4.52 | 3.08 |
| OTTHUMG00000166178 | 3.78 | 4.35 | 3.39 |
| TRGV10             | 3.78 | 4.37 | 3.13 |
| KAZN               | 3.78 | 4.10 | 3.45 |
| KIF9-AS1           | 3.78 | 4.05 | 3.42 |
| MIR181B2           | 3.78 | 4.38 | 3.30 |
| OTTHUMG00000160465 | 3.78 | 4.64 | 3.22 |
| IL24               | 3.78 | 4.34 | 3.21 |
| GGN                | 3.78 | 4.58 | 3.46 |
| CDH7               | 3.78 | 4.28 | 3.47 |
| CDC6               | 3.78 | 4.61 | 2.97 |
| BEST2              | 3.78 | 4.31 | 3.47 |
| LINC00442          | 3.78 | 4.24 | 3.31 |
| HESX1              | 3.78 | 4.15 | 3.27 |
| CNGA2              | 3.78 | 4.26 | 3.31 |
| EFHB               | 3.78 | 4.08 | 3.50 |
| LOC100128893       | 3.78 | 4.32 | 3.27 |
| OTTHUMG00000152485 | 3.78 | 4.53 | 3.43 |
| OTTHUMG00000019203 | 3.78 | 4.21 | 3.31 |
| SMR3B              | 3.78 | 4.85 | 2.97 |
| IL3                | 3.78 | 4.57 | 3.30 |
| OTTHUMG00000157659 | 3.78 | 4.02 | 3.48 |
| SPIN4-AS1          | 3.78 | 4.16 | 3.12 |
| OTTHUMG00000017563 | 3.78 | 4.04 | 3.41 |
| C7orf71            | 3.78 | 4.04 | 3.33 |
| NMUR2              | 3.78 | 4.38 | 3.35 |
| OTTHUMG00000018055 | 3.78 | 4.17 | 3.52 |
| SCG5               | 3.78 | 4.52 | 3.28 |
| CACNA2D3           | 3.78 | 4.14 | 3.39 |
| NUTM1              | 3.78 | 4.31 | 3.09 |
| MIR4327            | 3.78 | 4.43 | 3.18 |
| ZNF599             | 3.78 | 4.27 | 3.38 |
| OTTHUMG00000166592 | 3.78 | 4.12 | 3.11 |

|                    |      |      |      |
|--------------------|------|------|------|
| ANKRD31            | 3.78 | 4.29 | 3.32 |
| ZNF554             | 3.78 | 4.26 | 3.29 |
| MIR1323            | 3.78 | 4.60 | 3.06 |
| IGKV1D-17          | 3.78 | 4.48 | 2.87 |
| OTTHUMG00000159346 | 3.78 | 4.26 | 3.39 |
| LOC643401          | 3.78 | 4.78 | 3.28 |
| VN2R9P             | 3.78 | 4.18 | 3.29 |
| IMMP1L             | 3.78 | 4.29 | 3.41 |
| PNLIP              | 3.78 | 4.07 | 3.33 |
| SNORD61            | 3.78 | 4.50 | 3.10 |
| LOC100507584       | 3.78 | 4.21 | 3.39 |
| ASAH2B             | 3.78 | 4.44 | 3.43 |
| LOC388414          | 3.78 | 4.12 | 3.38 |
| SULT1C2P1          | 3.78 | 4.39 | 3.13 |
| KLHL41             | 3.78 | 4.27 | 3.46 |
| AP1M2              | 3.77 | 4.42 | 3.34 |
| OTTHUMG00000035479 | 3.77 | 4.02 | 3.38 |
| MGC34034           | 3.77 | 4.16 | 3.33 |
| FIGNL1             | 3.77 | 4.24 | 3.02 |
| KCNH6              | 3.77 | 4.15 | 3.33 |
| MYOCD              | 3.77 | 4.11 | 3.34 |
| NEUROG1            | 3.77 | 4.35 | 3.17 |
| LOC402269          | 3.77 | 4.14 | 3.08 |
| OTTHUMG00000164700 | 3.77 | 4.42 | 3.14 |
| RIMKLA             | 3.77 | 4.10 | 3.23 |
| ZNF771             | 3.77 | 4.26 | 3.23 |
| POLE2              | 3.77 | 4.45 | 3.26 |
| TREML5P            | 3.77 | 4.67 | 2.70 |
| IQCJ-SCHIP1-AS1    | 3.77 | 4.47 | 3.42 |
| DHFR               | 3.77 | 4.17 | 3.03 |
| RNA5SP357          | 3.77 | 4.34 | 2.83 |
| LOC388820          | 3.77 | 4.05 | 3.14 |
| LINC00595          | 3.77 | 4.20 | 3.07 |
| OTTHUMG00000160332 | 3.77 | 4.71 | 3.21 |
| CCDC112            | 3.77 | 4.30 | 3.36 |
| FAM9C              | 3.77 | 4.20 | 3.35 |
| LINC00029          | 3.77 | 4.16 | 3.42 |
| ZNF223             | 3.77 | 4.46 | 3.37 |
| OR56A5             | 3.77 | 4.40 | 3.13 |
| SPINK2             | 3.77 | 4.09 | 3.38 |
| TCEB3C             | 3.77 | 4.99 | 3.20 |
| KCNG3              | 3.77 | 4.42 | 3.31 |
| LINC00572          | 3.77 | 4.00 | 3.54 |
| NKX2-4             | 3.77 | 4.09 | 3.53 |
| CXCL9              | 3.77 | 4.48 | 2.90 |
| OTTHUMG00000164854 | 3.77 | 4.08 | 3.62 |
| BHMT2              | 3.77 | 4.13 | 3.49 |
| CCDC39             | 3.77 | 4.12 | 3.08 |
| KIF25-AS1          | 3.77 | 4.07 | 3.42 |

|                    |      |      |      |
|--------------------|------|------|------|
| HIPK4              | 3.77 | 4.11 | 3.34 |
| OTTHUMG00000156391 | 3.77 | 4.11 | 3.39 |
| MORN5              | 3.77 | 4.24 | 3.29 |
| ITIH3              | 3.77 | 4.15 | 3.38 |
| HOXC-AS3           | 3.77 | 4.34 | 3.47 |
| FBXL15             | 3.77 | 4.03 | 3.44 |
| CTNNA2             | 3.77 | 4.19 | 3.33 |
| CGN                | 3.77 | 4.19 | 3.46 |
| PGA5               | 3.77 | 4.30 | 3.04 |
| OTTHUMG00000019649 | 3.77 | 4.04 | 3.54 |
| SLC45A2            | 3.77 | 4.19 | 3.26 |
| ZWILCH             | 3.77 | 4.29 | 3.40 |
| PRODH2             | 3.77 | 4.28 | 3.48 |
| DIP2A-IT1          | 3.77 | 4.29 | 3.17 |
| GLYATL1            | 3.77 | 4.34 | 3.38 |
| WFDC6              | 3.77 | 4.14 | 3.55 |
| KIF6               | 3.76 | 4.19 | 3.36 |
| MIR760             | 3.76 | 3.92 | 3.46 |
| TCF15              | 3.76 | 4.19 | 3.43 |
| ZNF252P-AS1        | 3.76 | 4.02 | 3.20 |
| LOC643542          | 3.76 | 4.09 | 3.22 |
| OTTHUMG00000040729 | 3.76 | 4.12 | 3.38 |
| SLCO4A1            | 3.76 | 4.32 | 3.18 |
| LOC256880          | 3.76 | 4.38 | 3.43 |
| LOC644554          | 3.76 | 4.08 | 3.15 |
| LOC401442          | 3.76 | 4.32 | 3.15 |
| KALP               | 3.76 | 4.01 | 3.46 |
| CDH1               | 3.76 | 4.14 | 3.51 |
| DLL3               | 3.76 | 4.06 | 3.35 |
| CETN1              | 3.76 | 4.04 | 3.45 |
| PLEK2              | 3.76 | 4.26 | 3.19 |
| MIR568             | 3.76 | 4.55 | 2.94 |
| SLC25A48           | 3.76 | 3.97 | 3.54 |
| KRTAP6-3           | 3.76 | 4.65 | 3.29 |
| CCBE1              | 3.76 | 4.26 | 3.38 |
| TDRD6              | 3.76 | 4.16 | 3.38 |
| RHBDL3             | 3.76 | 4.59 | 3.29 |
| FSTL4              | 3.76 | 4.20 | 3.30 |
| OTTHUMG00000172094 | 3.76 | 4.17 | 3.39 |
| GFOD1-AS1          | 3.76 | 4.19 | 3.36 |
| LINC00410          | 3.76 | 4.32 | 3.16 |
| RHD                | 3.76 | 4.73 | 2.19 |
| HCN2               | 3.76 | 4.05 | 3.35 |
| LOC100505685       | 3.76 | 4.23 | 3.45 |
| LOC100505754       | 3.76 | 4.58 | 3.11 |
| DCDC2C             | 3.76 | 4.16 | 3.47 |
| NOS2               | 3.76 | 4.40 | 3.31 |
| CELA1              | 3.76 | 4.06 | 3.42 |
| CCDC11             | 3.76 | 4.11 | 3.50 |

|                    |      |      |      |
|--------------------|------|------|------|
| OTTHUMG00000015939 | 3.76 | 4.28 | 3.18 |
| GOLGA8UP           | 3.76 | 4.06 | 3.20 |
| SIT1               | 3.76 | 4.38 | 3.26 |
| GKAP1              | 3.76 | 4.07 | 3.49 |
| OTTHUMG00000032120 | 3.76 | 4.31 | 3.17 |
| TRAJ27             | 3.76 | 4.52 | 3.28 |
| OTTHUMG00000166131 | 3.76 | 4.08 | 3.54 |
| SNORA14B           | 3.76 | 5.01 | 2.78 |
| LINC00202-2        | 3.76 | 4.22 | 3.17 |
| OTTHUMG00000164086 | 3.76 | 4.15 | 3.29 |
| USP29              | 3.76 | 4.37 | 3.46 |
| TMEM99             | 3.76 | 4.31 | 3.14 |
| ATP8A2             | 3.75 | 4.06 | 3.13 |
| SH2D4B             | 3.75 | 4.10 | 3.53 |
| DNAL4              | 3.75 | 3.94 | 3.38 |
| NRXN1              | 3.75 | 4.15 | 3.53 |
| SLC26A9            | 3.75 | 4.31 | 3.23 |
| OTTHUMG00000022550 | 3.75 | 4.33 | 2.78 |
| LINC00051          | 3.75 | 4.38 | 3.23 |
| LINC00517          | 3.75 | 4.47 | 3.40 |
| OTTHUMG00000150045 | 3.75 | 4.34 | 3.04 |
| OTTHUMG00000162962 | 3.75 | 4.10 | 3.28 |
| LOC100506328       | 3.75 | 4.05 | 3.35 |
| NR5A2              | 3.75 | 4.37 | 3.34 |
| FAM81B             | 3.75 | 4.45 | 3.15 |
| MMP25              | 3.75 | 4.35 | 3.45 |
| ITLN2              | 3.75 | 4.12 | 3.20 |
| CYP2A13            | 3.75 | 4.23 | 3.38 |
| OTTHUMG00000032679 | 3.75 | 4.06 | 2.86 |
| OTTHUMG00000163965 | 3.75 | 4.31 | 3.26 |
| COX6B2             | 3.75 | 4.10 | 3.36 |
| RNU7-22P           | 3.75 | 4.37 | 3.21 |
| TRAJ56             | 3.75 | 4.57 | 2.67 |
| OTTHUMG00000161707 | 3.75 | 4.46 | 3.03 |
| FGF13-AS1          | 3.75 | 4.57 | 3.38 |
| LOC644838          | 3.75 | 4.09 | 3.45 |
| RNF125             | 3.75 | 4.27 | 3.16 |
| PRKG2              | 3.75 | 4.27 | 3.37 |
| SLC7A9             | 3.75 | 4.18 | 3.45 |
| CPSF4L             | 3.75 | 4.03 | 3.29 |
| PICK1              | 3.75 | 4.25 | 3.25 |
| DPY19L2P3          | 3.75 | 4.51 | 3.35 |
| OTTHUMG00000168121 | 3.75 | 4.80 | 3.22 |
| IFNA2              | 3.75 | 4.16 | 3.13 |
| ALB                | 3.75 | 4.30 | 3.42 |
| OTTHUMG00000045137 | 3.75 | 4.09 | 3.46 |
| LOC100506011       | 3.75 | 4.10 | 3.18 |
| IGHV3-74           | 3.75 | 4.47 | 3.17 |
| HK3                | 3.75 | 4.16 | 3.11 |

|                    |      |      |      |
|--------------------|------|------|------|
| SNTG2              | 3.75 | 4.30 | 3.41 |
| POU6F2-AS1         | 3.75 | 4.11 | 3.37 |
| ZNF165             | 3.75 | 4.38 | 3.31 |
| OTTHUMG00000163129 | 3.75 | 4.18 | 3.34 |
| LOC401164          | 3.75 | 4.38 | 3.04 |
| BEX1               | 3.75 | 4.55 | 2.72 |
| OTTHUMG00000018026 | 3.75 | 4.33 | 3.40 |
| LRRC36             | 3.75 | 4.29 | 3.21 |
| OTTHUMG00000018320 | 3.75 | 4.16 | 3.36 |
| OTTHUMG00000017587 | 3.75 | 4.29 | 3.09 |
| MIR54802           | 3.75 | 4.60 | 2.55 |
| FCAR               | 3.75 | 4.17 | 3.50 |
| OTTHUMG00000164773 | 3.75 | 4.05 | 3.41 |
| CXXC4              | 3.75 | 4.20 | 3.16 |
| CATSPERG           | 3.75 | 4.29 | 3.43 |
| CERS3              | 3.75 | 4.15 | 3.29 |
| OTTHUMG00000157083 | 3.75 | 4.03 | 3.26 |
| LENEP              | 3.75 | 4.54 | 3.35 |
| GLYATL2            | 3.75 | 4.77 | 2.38 |
| URB2               | 3.75 | 4.03 | 3.53 |
| CARD11             | 3.75 | 4.20 | 3.30 |
| TTY4               | 3.75 | 4.14 | 3.42 |
| LOC649395          | 3.75 | 4.71 | 2.77 |
| OR6F1              | 3.74 | 4.13 | 3.17 |
| MIR4776-2          | 3.74 | 4.32 | 3.07 |
| MMACHC             | 3.74 | 4.27 | 3.38 |
| LOC723805          | 3.74 | 4.46 | 3.27 |
| OTTHUMG00000151745 | 3.74 | 4.18 | 3.27 |
| DSC1               | 3.74 | 4.24 | 3.32 |
| RHOXF2B            | 3.74 | 4.20 | 3.28 |
| PIR-FIGF           | 3.74 | 4.19 | 3.38 |
| LINC00520          | 3.74 | 4.29 | 3.40 |
| LOC100129935       | 3.74 | 4.08 | 3.17 |
| MUC7               | 3.74 | 4.45 | 3.08 |
| KIF5A              | 3.74 | 4.05 | 3.18 |
| DEFB108B           | 3.74 | 4.11 | 3.56 |
| DEFB134            | 3.74 | 4.02 | 3.31 |
| OTTHUMG00000151623 | 3.74 | 4.10 | 3.33 |
| BAIAP2-AS1         | 3.74 | 4.33 | 3.47 |
| ANKRD1             | 3.74 | 4.05 | 3.42 |
| JPH1               | 3.74 | 4.15 | 3.39 |
| ADH4               | 3.74 | 4.18 | 3.51 |
| NXF2               | 3.74 | 4.11 | 3.27 |
| MGST1              | 3.74 | 4.16 | 3.27 |
| SNAP25-AS1         | 3.74 | 3.93 | 3.46 |
| OR13J1             | 3.74 | 4.46 | 2.67 |
| ANKRD36BP2         | 3.74 | 4.73 | 3.22 |
| OR6B3              | 3.74 | 4.13 | 3.06 |
| OTTHUMG00000015403 | 3.74 | 3.97 | 3.24 |

|                    |      |      |      |
|--------------------|------|------|------|
| LINC00348          | 3.74 | 4.57 | 3.11 |
| PAR1               | 3.74 | 4.16 | 3.26 |
| OVCH1              | 3.74 | 4.36 | 3.37 |
| RNA5SP131          | 3.74 | 4.33 | 2.55 |
| TRIAP1             | 3.74 | 4.12 | 3.24 |
| MIS18A-AS1         | 3.74 | 4.12 | 2.90 |
| BBS12              | 3.74 | 4.41 | 3.31 |
| MIR3183            | 3.74 | 4.09 | 3.09 |
| H2AFB3             | 3.74 | 4.09 | 3.42 |
| MSRB1              | 3.74 | 4.14 | 3.37 |
| OTTHUMG00000171523 | 3.74 | 3.99 | 3.42 |
| SPATA8             | 3.74 | 4.12 | 3.37 |
| OTTHUMG00000169993 | 3.74 | 5.14 | 2.76 |
| EPHA6              | 3.73 | 4.09 | 3.39 |
| MIR518C            | 3.73 | 4.62 | 2.76 |
| OTTHUMG00000015988 | 3.73 | 4.09 | 3.38 |
| KRT71              | 3.73 | 4.37 | 2.78 |
| OTTHUMG00000170325 | 3.73 | 4.28 | 3.27 |
| C1orf68            | 3.73 | 4.09 | 3.37 |
| AIRE               | 3.73 | 4.11 | 3.34 |
| LOC283038          | 3.73 | 4.04 | 3.36 |
| OTTHUMG00000166465 | 3.73 | 4.13 | 3.37 |
| LRRC4B             | 3.73 | 4.25 | 3.19 |
| LOC101060609       | 3.73 | 4.16 | 3.30 |
| LRRC31             | 3.73 | 4.43 | 3.26 |
| CXCR3              | 3.73 | 4.58 | 3.08 |
| CA14               | 3.73 | 4.42 | 3.22 |
| KLK13              | 3.73 | 4.09 | 3.33 |
| TRIM71             | 3.73 | 4.31 | 2.83 |
| ALKBH1             | 3.73 | 4.16 | 3.28 |
| NPY4R              | 3.73 | 4.15 | 3.40 |
| OTTHUMG00000170586 | 3.73 | 4.08 | 3.48 |
| LOC100131497       | 3.73 | 4.88 | 3.18 |
| FBXO15             | 3.73 | 4.15 | 3.44 |
| SIAH3              | 3.73 | 4.32 | 3.00 |
| STX19              | 3.73 | 4.07 | 3.27 |
| KHDC1L             | 3.73 | 4.67 | 3.03 |
| LOC100268168       | 3.73 | 4.15 | 3.09 |
| DSCC1              | 3.73 | 4.46 | 3.19 |
| OTTHUMG00000172115 | 3.73 | 4.29 | 3.29 |
| ZNF235             | 3.73 | 4.04 | 3.44 |
| RNA5SP259          | 3.73 | 4.62 | 3.01 |
| SLC28A3            | 3.73 | 4.07 | 3.33 |
| CYP39A1            | 3.73 | 4.20 | 3.17 |
| RAP1GAP            | 3.73 | 3.96 | 3.36 |
| HP                 | 3.73 | 5.11 | 2.89 |
| TCF7L1-IT1         | 3.73 | 4.30 | 3.04 |
| OTTHUMG00000179967 | 3.73 | 4.23 | 2.97 |
| CRYBA1             | 3.73 | 4.16 | 3.24 |

|                    |      |      |      |
|--------------------|------|------|------|
| OTTHUMG00000170044 | 3.73 | 4.46 | 3.08 |
| OTTHUMG00000170731 | 3.73 | 4.27 | 3.06 |
| DKFZp451B082       | 3.73 | 4.21 | 3.37 |
| LOC100506016       | 3.73 | 3.97 | 3.26 |
| SLC4A8             | 3.73 | 3.92 | 3.27 |
| SNORD114-24        | 3.73 | 5.51 | 2.82 |
| KCTD16             | 3.73 | 3.94 | 3.46 |
| LOC340357          | 3.73 | 4.18 | 3.24 |
| LOC554206          | 3.73 | 4.48 | 3.27 |
| MOGAT2             | 3.73 | 4.03 | 3.15 |
| SPINK6             | 3.73 | 4.72 | 3.33 |
| RHOV               | 3.73 | 4.25 | 3.40 |
| C3orf43            | 3.73 | 4.21 | 3.34 |
| TMEM239            | 3.73 | 4.36 | 3.44 |
| LINC00540          | 3.73 | 4.30 | 2.88 |
| CNTNAP2            | 3.73 | 3.97 | 3.51 |
| NPS                | 3.73 | 4.21 | 3.06 |
| C17orf67           | 3.73 | 4.03 | 3.22 |
| LRMP               | 3.73 | 4.06 | 3.49 |
| ACSM3              | 3.73 | 4.12 | 3.57 |
| OTTHUMG00000163130 | 3.73 | 4.15 | 3.33 |
| IRX4               | 3.73 | 4.28 | 3.21 |
| OTTHUMG00000015771 | 3.73 | 4.47 | 3.11 |
| LINC00486          | 3.73 | 4.16 | 3.36 |
| C1QTNF9            | 3.73 | 4.40 | 2.54 |
| ERVV-2             | 3.73 | 4.25 | 3.23 |
| LOC344967          | 3.73 | 4.16 | 3.24 |
| LINGO2             | 3.73 | 4.12 | 3.40 |
| DHRX-IT1           | 3.73 | 4.07 | 3.42 |
| COL4A3             | 3.73 | 4.04 | 3.37 |
| OTTHUMG00000032768 | 3.73 | 4.19 | 3.15 |
| LOC100506369       | 3.73 | 4.15 | 3.29 |
| ABHD17B            | 3.72 | 4.27 | 3.30 |
| CD3G               | 3.72 | 4.14 | 3.23 |
| LOC100506795       | 3.72 | 4.32 | 3.32 |
| LOC100132529       | 3.72 | 4.03 | 3.42 |
| NXPB1              | 3.72 | 4.14 | 3.54 |
| DRD1               | 3.72 | 3.98 | 3.30 |
| LOC100505695       | 3.72 | 4.31 | 3.23 |
| LOC646522          | 3.72 | 4.23 | 3.43 |
| FAM87A             | 3.72 | 4.20 | 3.19 |
| OTTHUMG00000164156 | 3.72 | 4.27 | 3.22 |
| MIR4263            | 3.72 | 4.80 | 2.66 |
| OLIG3              | 3.72 | 4.15 | 3.19 |
| BTBD17             | 3.72 | 4.10 | 3.21 |
| GLRB               | 3.72 | 4.42 | 3.23 |
| LOC339685          | 3.72 | 4.37 | 3.36 |
| OTTHUMG00000032101 | 3.72 | 4.27 | 3.18 |
| SLITRK3            | 3.72 | 4.10 | 3.22 |



|                     |      |      |      |
|---------------------|------|------|------|
| OTTHUMG00000032491  | 3.72 | 4.29 | 3.19 |
| TRAV20              | 3.72 | 4.25 | 3.12 |
| DLG1-AS1            | 3.72 | 4.72 | 3.34 |
| KLHL14              | 3.72 | 4.18 | 3.37 |
| ZNF681              | 3.72 | 4.34 | 3.24 |
| OR5K2               | 3.72 | 4.35 | 3.23 |
| OTTHUMG00000010944  | 3.72 | 4.40 | 3.35 |
| OTTHUMG00000020894  | 3.72 | 4.13 | 3.39 |
| ERC2                | 3.72 | 4.06 | 3.16 |
| PVALB               | 3.72 | 4.28 | 3.20 |
| NLGN1               | 3.72 | 4.05 | 3.37 |
| LPAL2               | 3.72 | 4.49 | 3.11 |
| GALNTL6             | 3.72 | 4.12 | 3.36 |
| MARVELD2            | 3.72 | 3.93 | 3.40 |
| HBBP1               | 3.72 | 4.70 | 2.94 |
| OTTHUMG000000162923 | 3.72 | 4.20 | 3.31 |
| ZNF501              | 3.72 | 4.17 | 3.21 |
| OTTHUMG000000159096 | 3.72 | 3.97 | 3.40 |
| FBXL16              | 3.72 | 4.01 | 3.49 |
| FAM163A             | 3.72 | 4.19 | 3.25 |
| FBXL13              | 3.72 | 4.37 | 3.24 |
| SLC38A11            | 3.72 | 4.57 | 3.11 |
| HNRNPA1L2           | 3.72 | 4.48 | 3.28 |
| RNA5SP387           | 3.72 | 4.57 | 3.01 |
| LOC100506258        | 3.72 | 4.08 | 3.29 |
| ZNF843              | 3.72 | 4.19 | 2.94 |
| OTTHUMG000000170725 | 3.72 | 4.13 | 3.29 |
| FUT3                | 3.72 | 3.92 | 3.36 |
| OTTHUMG000000168240 | 3.72 | 4.11 | 3.15 |
| SLFN13              | 3.72 | 4.16 | 3.15 |
| OTTHUMG000000163339 | 3.72 | 4.14 | 3.18 |
| OTTHUMG000000166909 | 3.72 | 4.06 | 3.36 |
| LOC647983           | 3.72 | 4.14 | 3.22 |
| KCNMB3              | 3.72 | 3.95 | 3.37 |
| LOC100506895        | 3.72 | 3.99 | 3.23 |
| NT5C1A              | 3.72 | 4.15 | 3.18 |
| PTPRG-AS1           | 3.72 | 3.92 | 3.41 |
| LOC157273           | 3.72 | 4.10 | 3.24 |
| OTTHUMG000000153617 | 3.72 | 4.21 | 3.23 |
| MKRN1               | 3.71 | 4.27 | 3.30 |
| CDKN2A              | 3.71 | 4.25 | 3.42 |
| OTTHUMG000000156460 | 3.71 | 4.29 | 3.21 |
| OTTHUMG000000170259 | 3.71 | 4.67 | 3.11 |
| OTTHUMG00000015665  | 3.71 | 4.36 | 3.27 |
| LOC100630918        | 3.71 | 4.20 | 3.19 |
| LOC254028           | 3.71 | 4.13 | 3.34 |
| OTTHUMG00000019542  | 3.71 | 4.71 | 2.76 |
| OTTHUMG000000156619 | 3.71 | 4.46 | 3.09 |
| LOC286190           | 3.71 | 4.11 | 3.13 |

|                     |      |      |      |
|---------------------|------|------|------|
| RPS26P11            | 3.71 | 4.58 | 3.30 |
| CLDN22              | 3.71 | 4.30 | 3.15 |
| FDXACB1             | 3.71 | 4.25 | 3.30 |
| OTTHUMG00000021819  | 3.71 | 4.02 | 3.44 |
| OTTHUMG00000173284  | 3.71 | 4.09 | 3.58 |
| OTTHUMG00000155766  | 3.71 | 4.50 | 2.96 |
| ZDHHC22             | 3.71 | 4.23 | 3.51 |
| OTTHUMG00000166137  | 3.71 | 3.95 | 3.27 |
| MIR4305             | 3.71 | 4.66 | 3.29 |
| UMODL1              | 3.71 | 4.16 | 3.35 |
| LOC100287834        | 3.71 | 5.43 | 2.33 |
| USH2A               | 3.71 | 3.99 | 3.36 |
| MOV10L1             | 3.71 | 4.43 | 3.06 |
| IGHV3-20            | 3.71 | 4.36 | 3.09 |
| OTTHUMG00000151328  | 3.71 | 3.93 | 3.39 |
| OTTHUMG00000040862  | 3.71 | 4.11 | 3.16 |
| XXYLT1-AS1          | 3.71 | 4.00 | 3.38 |
| OTTHUMG00000166233  | 3.71 | 4.11 | 3.27 |
| OTTHUMG00000020074  | 3.71 | 4.30 | 3.29 |
| PIP5K1B             | 3.71 | 4.07 | 3.31 |
| RLBP1               | 3.71 | 4.01 | 3.45 |
| OTTHUMG00000016072  | 3.71 | 4.09 | 2.97 |
| KLK12               | 3.71 | 4.13 | 3.19 |
| NKX6-1              | 3.71 | 4.15 | 3.33 |
| PRAMEF4             | 3.71 | 4.45 | 2.84 |
| OTTHUMG00000170117  | 3.71 | 4.28 | 3.29 |
| LPPR4               | 3.71 | 4.33 | 2.97 |
| HOMER2              | 3.71 | 4.34 | 3.40 |
| OTTHUMG00000168223  | 3.71 | 4.23 | 2.98 |
| CSN1S1              | 3.71 | 5.61 | 2.75 |
| LINC00551           | 3.71 | 4.17 | 3.25 |
| MIR553              | 3.71 | 4.57 | 2.88 |
| LOC100506714        | 3.71 | 4.11 | 3.39 |
| C2CD4B              | 3.71 | 4.41 | 3.40 |
| OTTHUMG00000020688  | 3.71 | 4.01 | 3.42 |
| OTTHUMG00000161792  | 3.71 | 4.11 | 3.30 |
| LOC100129098        | 3.71 | 4.14 | 3.06 |
| OTTHUMG000000057558 | 3.71 | 4.30 | 2.91 |
| DSPP                | 3.71 | 4.15 | 3.29 |
| EFCAB3              | 3.70 | 4.07 | 3.20 |
| PAX9                | 3.70 | 4.33 | 3.32 |
| FLT3                | 3.70 | 4.09 | 3.28 |
| SERPINA9            | 3.70 | 4.07 | 3.43 |
| DOCK9-AS1           | 3.70 | 4.12 | 3.07 |
| LINC00681           | 3.70 | 4.16 | 3.34 |
| LINC00483           | 3.70 | 4.11 | 3.05 |
| CALML5              | 3.70 | 4.13 | 3.33 |
| OTTHUMG00000176716  | 3.70 | 4.45 | 3.14 |
| OTTHUMG00000019594  | 3.70 | 4.29 | 3.20 |

|                     |      |      |      |
|---------------------|------|------|------|
| POTED               | 3.70 | 4.37 | 2.98 |
| LBX1-AS1            | 3.70 | 4.20 | 3.09 |
| ACVR2B              | 3.70 | 4.08 | 3.39 |
| OTTHUMG00000016045  | 3.70 | 4.04 | 3.43 |
| OTTHUMG00000015812  | 3.70 | 4.12 | 3.30 |
| CXCR1               | 3.70 | 4.50 | 3.23 |
| KIAA1958            | 3.70 | 3.91 | 3.49 |
| STOML3              | 3.70 | 4.15 | 3.43 |
| ZNF416              | 3.70 | 4.01 | 3.21 |
| ATP4B               | 3.70 | 4.04 | 3.35 |
| ZNF428              | 3.70 | 3.93 | 3.30 |
| SLC12A5             | 3.70 | 4.39 | 2.86 |
| OTTHUMG000000164999 | 3.70 | 4.02 | 3.39 |
| TAS2R19             | 3.70 | 5.19 | 3.00 |
| LOC729040           | 3.70 | 4.18 | 3.19 |
| LOC100507639        | 3.70 | 4.46 | 3.32 |
| OTTHUMG00000017483  | 3.70 | 4.11 | 3.28 |
| OTTHUMG00000014989  | 3.70 | 4.32 | 3.23 |
| LOC641515           | 3.70 | 4.17 | 3.13 |
| TPM3                | 3.70 | 4.21 | 3.13 |
| LINC00601           | 3.70 | 4.26 | 3.26 |
| TXNDC8              | 3.70 | 4.22 | 2.99 |
| OR13C4              | 3.70 | 4.45 | 3.18 |
| TRBV21OR9-2         | 3.70 | 4.47 | 2.97 |
| C19orf26            | 3.70 | 4.23 | 3.44 |
| PAX3                | 3.70 | 3.98 | 3.18 |
| OTTHUMG000000172086 | 3.70 | 4.35 | 3.23 |
| DKFZP434L187        | 3.70 | 4.20 | 3.20 |
| BDNF-AS             | 3.70 | 3.85 | 3.45 |
| MME-AS1             | 3.70 | 5.47 | 2.82 |
| HMMR                | 3.70 | 4.20 | 3.12 |
| C6orf100            | 3.70 | 3.98 | 3.41 |
| OTTHUMG000000155764 | 3.70 | 4.46 | 3.18 |
| MBL2                | 3.70 | 4.11 | 3.17 |
| OTTHUMG000000170227 | 3.70 | 4.68 | 3.17 |
| LOC100505588        | 3.70 | 4.01 | 3.35 |
| OTTHUMG000000156060 | 3.70 | 4.16 | 3.22 |
| KLHL36              | 3.70 | 4.07 | 3.20 |
| GYS1                | 3.70 | 4.36 | 3.29 |
| OTTHUMG00000020030  | 3.70 | 4.06 | 3.24 |
| FAM104B             | 3.70 | 4.16 | 3.28 |
| PATE2               | 3.69 | 4.34 | 3.25 |
| LCTL                | 3.69 | 4.09 | 3.06 |
| GOLT1A              | 3.69 | 4.09 | 3.20 |
| NCBP2L              | 3.69 | 4.10 | 3.42 |
| SLC5A11             | 3.69 | 4.22 | 3.37 |
| CCR6                | 3.69 | 4.05 | 3.37 |
| XXYLT1-AS2          | 3.69 | 4.30 | 3.08 |
| C3orf36             | 3.69 | 4.20 | 3.07 |

|                    |      |      |      |
|--------------------|------|------|------|
| FLJ46134           | 3.69 | 4.08 | 3.46 |
| CCDC177            | 3.69 | 4.58 | 2.90 |
| OTTHUMG00000165711 | 3.69 | 4.35 | 3.08 |
| CYP4F12            | 3.69 | 4.08 | 3.23 |
| SNORD114-4         | 3.69 | 5.89 | 2.61 |
| TRPC6              | 3.69 | 4.37 | 2.89 |
| NKX2-6             | 3.69 | 4.05 | 3.34 |
| OTTHUMG00000021872 | 3.69 | 4.17 | 3.24 |
| OTTHUMG00000169952 | 3.69 | 4.31 | 3.22 |
| GABRR3             | 3.69 | 4.19 | 3.05 |
| CAPS2              | 3.69 | 3.97 | 3.22 |
| OTTHUMG00000166208 | 3.69 | 4.30 | 2.93 |
| KIAA1211           | 3.69 | 4.30 | 3.26 |
| MIRLET7I           | 3.69 | 4.07 | 2.85 |
| TRPV5              | 3.69 | 4.30 | 3.00 |
| CSTA               | 3.69 | 4.53 | 3.08 |
| DAPK1-IT1          | 3.69 | 4.94 | 2.50 |
| NODAL              | 3.69 | 4.09 | 3.37 |
| IL9                | 3.69 | 4.19 | 3.38 |
| MIR623             | 3.69 | 4.27 | 3.16 |
| OTTHUMG00000021098 | 3.69 | 4.02 | 3.34 |
| ACSL6              | 3.69 | 4.08 | 3.31 |
| DOHH               | 3.69 | 3.99 | 3.47 |
| FLJ41481           | 3.69 | 4.09 | 3.10 |
| LOC100128787       | 3.69 | 3.93 | 3.33 |
| OTTHUMG00000155708 | 3.69 | 4.10 | 3.28 |
| OTTHUMG00000158980 | 3.69 | 4.23 | 3.20 |
| LOC255187          | 3.69 | 4.79 | 3.24 |
| SLC39A12           | 3.69 | 3.96 | 3.34 |
| HPSE               | 3.69 | 4.30 | 2.93 |
| LOC729770          | 3.69 | 4.14 | 3.18 |
| OR7E37P            | 3.69 | 4.12 | 3.34 |
| GRAMD1C            | 3.69 | 3.91 | 3.27 |
| DEPDC1B            | 3.69 | 4.23 | 3.36 |
| DKFZP434H168       | 3.68 | 3.96 | 3.25 |
| OTTHUMG00000017397 | 3.68 | 4.17 | 2.97 |
| OR13G1             | 3.68 | 4.32 | 3.13 |
| OTTHUMG00000171836 | 3.68 | 4.76 | 3.16 |
| BEND2              | 3.68 | 4.20 | 3.14 |
| SNORD113-2         | 3.68 | 5.33 | 2.77 |
| OR1D5              | 3.68 | 5.44 | 2.18 |
| OTTHUMG00000168902 | 3.68 | 4.11 | 3.36 |
| LOC100127974       | 3.68 | 4.14 | 2.96 |
| LRP1B              | 3.68 | 4.13 | 3.20 |
| LINC00424          | 3.68 | 4.12 | 3.18 |
| OTTHUMG00000162710 | 3.68 | 4.38 | 3.28 |
| LRCH2              | 3.68 | 4.21 | 2.82 |
| ZNF876P            | 3.68 | 4.21 | 3.20 |
| OTTHUMG00000155021 | 3.68 | 4.18 | 3.39 |

|                    |      |      |      |
|--------------------|------|------|------|
| OTTHUMG00000172157 | 3.68 | 4.09 | 3.32 |
| MYH1               | 3.68 | 4.51 | 3.33 |
| EFNB2              | 3.68 | 4.23 | 2.85 |
| LOC644189          | 3.68 | 4.13 | 2.87 |
| OTTHUMG00000162156 | 3.68 | 4.07 | 3.01 |
| CNR1               | 3.68 | 4.63 | 3.37 |
| OTTHUMG00000035542 | 3.68 | 4.48 | 3.18 |
| ST7-AS1            | 3.68 | 4.03 | 3.27 |
| MUC19              | 3.68 | 4.17 | 3.36 |
| OR7E24             | 3.68 | 4.09 | 3.35 |
| OTTHUMG00000158939 | 3.68 | 3.93 | 3.33 |
| OTTHUMG00000163857 | 3.68 | 4.40 | 3.06 |
| OR7D4              | 3.68 | 4.44 | 3.21 |
| MIR497             | 3.68 | 4.20 | 3.39 |
| OR51A4             | 3.68 | 4.69 | 2.55 |
| CLEC12A            | 3.68 | 4.43 | 2.72 |
| SPTA1              | 3.68 | 3.96 | 3.45 |
| ASXL3              | 3.68 | 4.22 | 3.26 |
| ARHGEF35           | 3.68 | 3.91 | 3.34 |
| OTTHUMG00000171183 | 3.68 | 4.12 | 3.27 |
| DNAJC27-AS1        | 3.68 | 4.23 | 3.30 |
| M1AP               | 3.68 | 4.07 | 3.20 |
| SPINK5             | 3.68 | 4.16 | 3.48 |
| ETNPPL             | 3.68 | 4.10 | 3.30 |
| RNA5SP66           | 3.68 | 4.36 | 2.89 |
| CCDC96             | 3.68 | 4.11 | 3.27 |
| ABCD2              | 3.68 | 4.35 | 2.94 |
| RIBC2              | 3.68 | 4.16 | 3.30 |
| MIR3199-1          | 3.68 | 5.44 | 3.01 |
| OR4X2              | 3.68 | 4.33 | 3.01 |
| FLJ46284           | 3.68 | 4.01 | 3.34 |
| OTTHUMG00000016041 | 3.68 | 3.80 | 3.47 |
| PTGER3             | 3.68 | 4.44 | 3.14 |
| PDC                | 3.68 | 4.22 | 3.43 |
| ALDH1A2            | 3.68 | 4.50 | 3.08 |
| EMR1               | 3.68 | 4.20 | 3.15 |
| RAB40A             | 3.68 | 3.90 | 3.09 |
| LOC285626          | 3.68 | 4.04 | 3.48 |
| CACNA2D3-AS1       | 3.68 | 4.16 | 3.30 |
| UBE2MP1            | 3.68 | 4.62 | 3.10 |
| OTTHUMG00000156395 | 3.68 | 3.97 | 3.33 |
| LOC285548          | 3.67 | 4.17 | 3.25 |
| CXCR2P1            | 3.67 | 3.92 | 3.20 |
| IGHV1-58           | 3.67 | 4.32 | 2.76 |
| LOC100507630       | 3.67 | 4.12 | 3.22 |
| DEFB122            | 3.67 | 4.35 | 3.07 |
| HTR1E              | 3.67 | 4.23 | 3.29 |
| APOL4              | 3.67 | 4.10 | 3.30 |
| UBXN11             | 3.67 | 3.91 | 3.35 |

|                    |      |      |      |
|--------------------|------|------|------|
| OTTHUMG00000172297 | 3.67 | 4.57 | 3.18 |
| FLJ38379           | 3.67 | 4.62 | 2.46 |
| RD3                | 3.67 | 4.21 | 3.33 |
| ST8SIA2            | 3.67 | 4.08 | 3.18 |
| OTTHUMG00000163254 | 3.67 | 4.33 | 3.20 |
| AKR1B15            | 3.67 | 4.17 | 3.13 |
| LINC00441          | 3.67 | 4.15 | 3.06 |
| FAM19A2            | 3.67 | 4.29 | 3.02 |
| CADM2-AS1          | 3.67 | 4.29 | 3.00 |
| LRAT               | 3.67 | 4.23 | 2.99 |
| TBR1               | 3.67 | 3.95 | 3.45 |
| CTAGE1             | 3.67 | 4.11 | 3.12 |
| TRBV10-1           | 3.67 | 4.03 | 3.43 |
| MMP12              | 3.67 | 4.04 | 3.45 |
| OTTHUMG00000161245 | 3.67 | 4.28 | 3.23 |
| PCDH20             | 3.67 | 4.10 | 3.27 |
| NOX3               | 3.67 | 3.93 | 3.31 |
| OR2G2              | 3.67 | 4.25 | 2.91 |
| MIR383             | 3.67 | 4.01 | 3.38 |
| OTTHUMG00000153374 | 3.67 | 4.19 | 3.09 |
| LOC440905          | 3.67 | 4.90 | 2.89 |
| DLGAP1-AS2         | 3.67 | 3.98 | 2.97 |
| PDE6H              | 3.67 | 3.99 | 3.26 |
| LOC100505545       | 3.67 | 4.27 | 3.22 |
| CXorf27            | 3.67 | 4.11 | 3.07 |
| RPSAP58            | 3.67 | 4.05 | 3.19 |
| DEFB130            | 3.67 | 3.90 | 3.46 |
| OR4C15             | 3.67 | 4.13 | 3.10 |
| OTTHUMG00000169029 | 3.67 | 4.24 | 2.99 |
| C8B                | 3.67 | 4.07 | 3.08 |
| GPR39              | 3.67 | 4.02 | 3.21 |
| RNU7-58P           | 3.67 | 4.38 | 2.89 |
| NR1I2              | 3.67 | 3.91 | 3.34 |
| CASZ1              | 3.67 | 4.15 | 3.11 |
| ALDH4A1            | 3.67 | 3.92 | 3.44 |
| AMY2A              | 3.67 | 4.41 | 3.06 |
| OTTHUMG00000155824 | 3.67 | 4.26 | 3.05 |
| LOC100507540       | 3.67 | 3.87 | 3.23 |
| OTTHUMG00000016042 | 3.67 | 4.05 | 3.24 |
| MYB                | 3.67 | 3.95 | 3.17 |
| LINC00402          | 3.67 | 4.19 | 3.13 |
| LOC100506175       | 3.67 | 4.39 | 2.44 |
| LINC00433          | 3.67 | 3.97 | 3.35 |
| C1orf64            | 3.67 | 4.25 | 3.20 |
| SNORD114-6         | 3.67 | 4.65 | 1.84 |
| LOC100507664       | 3.67 | 4.11 | 3.17 |
| OTTHUMG00000164880 | 3.67 | 4.26 | 3.43 |
| C21orf90           | 3.67 | 4.22 | 2.99 |
| OTTHUMG00000172113 | 3.66 | 4.12 | 3.32 |

|                    |      |      |      |
|--------------------|------|------|------|
| SPHKAP             | 3.66 | 4.19 | 3.39 |
| OTTHUMG00000011879 | 3.66 | 4.98 | 2.79 |
| TEX30              | 3.66 | 4.17 | 3.18 |
| CDH12              | 3.66 | 3.96 | 3.36 |
| MIR196A2           | 3.66 | 4.44 | 3.00 |
| PRTN3              | 3.66 | 4.20 | 2.88 |
| OTTHUMG00000178331 | 3.66 | 4.64 | 2.97 |
| UCP1               | 3.66 | 3.95 | 3.28 |
| SEC14L3            | 3.66 | 4.27 | 3.39 |
| YY2                | 3.66 | 4.08 | 3.25 |
| DCX                | 3.66 | 4.10 | 3.36 |
| IFIT2              | 3.66 | 4.39 | 2.96 |
| PPP2R2B-IT1        | 3.66 | 4.13 | 3.38 |
| OTTHUMG00000164458 | 3.66 | 4.32 | 2.87 |
| RAB3IP             | 3.66 | 3.89 | 3.37 |
| LRFN2              | 3.66 | 4.19 | 3.02 |
| RABGAP1L-IT1       | 3.66 | 4.69 | 2.85 |
| ROS1               | 3.66 | 4.26 | 3.20 |
| ZP4                | 3.66 | 4.08 | 3.11 |
| ABCC13             | 3.66 | 4.39 | 3.10 |
| SLC16A14           | 3.66 | 3.99 | 3.25 |
| SMIM5              | 3.66 | 4.07 | 3.23 |
| LRRC52             | 3.66 | 3.94 | 3.41 |
| MIR153-1           | 3.66 | 4.11 | 3.39 |
| RDM1               | 3.66 | 4.03 | 3.30 |
| TNMD               | 3.66 | 4.18 | 3.17 |
| B3GALT5            | 3.66 | 4.24 | 3.28 |
| LOC285084          | 3.66 | 4.21 | 3.10 |
| LINC00920          | 3.66 | 4.16 | 3.40 |
| LMO1               | 3.66 | 4.07 | 3.38 |
| OTTHUMG00000154100 | 3.66 | 4.13 | 3.22 |
| CXXC1P1            | 3.66 | 4.03 | 3.31 |
| SNX20              | 3.66 | 4.25 | 3.21 |
| KLHL15             | 3.66 | 4.08 | 2.98 |
| LOC340094          | 3.66 | 4.05 | 3.22 |
| LOC100507537       | 3.66 | 4.17 | 3.27 |
| PGPEP1L            | 3.66 | 4.06 | 3.08 |
| OTTHUMG00000151796 | 3.66 | 4.00 | 3.21 |
| SVOPL              | 3.66 | 4.14 | 3.22 |
| MIR888             | 3.66 | 4.58 | 2.79 |
| OTTHUMG00000022338 | 3.66 | 4.44 | 2.86 |
| OR4C16             | 3.66 | 4.37 | 2.90 |
| UCN3               | 3.66 | 3.98 | 3.14 |
| LOC100506446       | 3.66 | 4.07 | 3.27 |
| IGKV1D-27          | 3.66 | 4.56 | 2.79 |
| FLJ46010           | 3.66 | 4.47 | 3.29 |
| CCER1              | 3.66 | 3.85 | 3.41 |
| FAM105A            | 3.66 | 4.66 | 2.94 |
| LOC100996310       | 3.66 | 4.01 | 3.15 |

|                    |      |      |      |
|--------------------|------|------|------|
| OTTHUMG00000163392 | 3.66 | 4.33 | 3.15 |
| RALYL              | 3.66 | 3.95 | 3.28 |
| LOC100507073       | 3.66 | 4.26 | 3.25 |
| LOC728769          | 3.66 | 3.87 | 3.29 |
| TTY20              | 3.66 | 4.07 | 3.29 |
| YTHDC1             | 3.66 | 4.15 | 2.88 |
| TSSC1-IT1          | 3.66 | 3.93 | 3.38 |
| AXDND1             | 3.66 | 3.90 | 3.18 |
| NUDT9P1            | 3.65 | 4.03 | 3.00 |
| OTTHUMG00000161687 | 3.65 | 3.96 | 3.27 |
| GIN54              | 3.65 | 3.98 | 3.40 |
| TP53RK             | 3.65 | 4.24 | 3.11 |
| OTTHUMG00000036746 | 3.65 | 4.19 | 3.43 |
| OTTHUMG00000168169 | 3.65 | 4.27 | 3.21 |
| IGHV3OR16-7        | 3.65 | 4.07 | 3.09 |
| LINC00940          | 3.65 | 3.93 | 3.41 |
| OTTHUMG00000017902 | 3.65 | 3.84 | 3.27 |
| SNORD1A            | 3.65 | 5.10 | 2.85 |
| ZNF502             | 3.65 | 4.45 | 2.88 |
| CORO2A             | 3.65 | 3.95 | 3.33 |
| PCED1B             | 3.65 | 4.11 | 3.11 |
| NRG1               | 3.65 | 4.02 | 3.24 |
| HS6ST2-AS1         | 3.65 | 4.15 | 3.41 |
| IRGM               | 3.65 | 4.20 | 3.05 |
| OTTHUMG00000019067 | 3.65 | 3.99 | 2.98 |
| TMEM108            | 3.65 | 4.13 | 3.14 |
| SLC17A4            | 3.65 | 4.11 | 3.22 |
| OTOP3              | 3.65 | 4.54 | 3.02 |
| CDY2A              | 3.65 | 4.44 | 2.98 |
| LOC646903          | 3.65 | 4.06 | 3.36 |
| ZNF682             | 3.65 | 4.39 | 3.08 |
| CHEK2              | 3.65 | 4.26 | 3.30 |
| OTTHUMG00000154152 | 3.65 | 3.98 | 3.43 |
| ITGA4              | 3.65 | 4.09 | 3.28 |
| MIR802             | 3.65 | 4.33 | 3.30 |
| MAGEA4             | 3.65 | 3.95 | 3.35 |
| TACSTD2            | 3.65 | 4.00 | 2.80 |
| LOC100506368       | 3.65 | 4.13 | 3.15 |
| SPAG11A            | 3.65 | 4.38 | 3.16 |
| LOC440028          | 3.65 | 3.97 | 3.32 |
| ZNF503-AS1         | 3.65 | 4.05 | 3.21 |
| FAM212A            | 3.65 | 4.00 | 3.22 |
| ATP8B5P            | 3.65 | 4.11 | 3.15 |
| MIR1293            | 3.65 | 4.21 | 3.10 |
| LOC100128714       | 3.65 | 4.06 | 3.10 |
| OR9Q1              | 3.65 | 3.99 | 3.15 |
| DCHS2              | 3.65 | 3.92 | 3.25 |
| FANCD2OS           | 3.65 | 4.24 | 2.95 |
| KCNAB1             | 3.64 | 3.84 | 3.24 |



|                    |      |      |      |
|--------------------|------|------|------|
| OTTHUMG00000166770 | 3.64 | 4.13 | 3.20 |
| OTTHUMG00000015925 | 3.64 | 4.37 | 3.05 |
| NPBWR2             | 3.64 | 4.25 | 3.35 |
| CITED4             | 3.64 | 4.04 | 3.12 |
| OTTHUMG00000031861 | 3.64 | 4.00 | 3.21 |
| KRT33B             | 3.64 | 4.74 | 3.08 |
| OR2H1              | 3.64 | 4.28 | 3.21 |
| OR10A7             | 3.64 | 4.34 | 2.77 |
| IGLV2-33           | 3.64 | 4.46 | 2.68 |
| OTTHUMG00000164258 | 3.64 | 4.39 | 3.15 |
| C1orf100           | 3.64 | 3.93 | 3.25 |
| ARHGEF9-IT1        | 3.64 | 3.99 | 3.11 |
| MIR656             | 3.64 | 4.13 | 3.30 |
| MIR4650-1          | 3.64 | 4.35 | 3.19 |
| RNF144A-AS1        | 3.64 | 4.28 | 3.28 |
| LDHAL6A            | 3.64 | 4.28 | 3.09 |
| SKOR2              | 3.64 | 4.08 | 3.35 |
| LOC643923          | 3.64 | 3.90 | 3.28 |
| C2orf66            | 3.64 | 3.96 | 3.15 |
| OTTHUMG00000171652 | 3.64 | 4.44 | 2.96 |
| OTTHUMG00000172318 | 3.64 | 4.39 | 3.20 |
| OTTHUMG00000155881 | 3.64 | 4.10 | 3.34 |
| ST7-AS2            | 3.64 | 4.15 | 3.35 |
| F2RL3              | 3.64 | 4.21 | 3.02 |
| C7orf33            | 3.64 | 4.00 | 3.30 |
| MIR4493            | 3.64 | 4.08 | 3.25 |
| PRNT               | 3.64 | 4.41 | 3.03 |
| HDAC11-AS1         | 3.64 | 3.95 | 3.13 |
| TBX5-AS1           | 3.64 | 4.29 | 3.31 |
| MAPK11             | 3.64 | 4.15 | 3.26 |
| RNU6-63P           | 3.64 | 3.98 | 3.34 |
| LOC100133306       | 3.64 | 3.89 | 3.20 |
| IGHV1-3            | 3.64 | 4.51 | 3.09 |
| FKBP1C             | 3.64 | 4.21 | 3.26 |
| IRX6               | 3.64 | 4.27 | 2.77 |
| FCGR3B             | 3.64 | 4.32 | 2.76 |
| OTTHUMG00000167762 | 3.64 | 4.19 | 3.00 |
| CYP2B6             | 3.64 | 4.39 | 2.98 |
| CTXN2              | 3.64 | 3.99 | 3.00 |
| LRRC37A5P          | 3.64 | 4.02 | 3.28 |
| OTTHUMG00000015322 | 3.64 | 4.35 | 3.16 |
| SLC4A1             | 3.64 | 4.11 | 3.20 |
| OTTHUMG00000172461 | 3.64 | 4.07 | 3.37 |
| ZCCHC12            | 3.64 | 4.16 | 3.27 |
| RNA5-8SP7          | 3.64 | 4.22 | 2.97 |
| PRKCQ-AS1          | 3.64 | 4.34 | 3.02 |
| KLRG1              | 3.64 | 3.97 | 3.43 |
| MIR192             | 3.63 | 4.38 | 3.03 |
| OTTHUMG00000171626 | 3.63 | 4.12 | 3.13 |

|                    |      |      |      |
|--------------------|------|------|------|
| LOC100505727       | 3.63 | 3.91 | 2.94 |
| GLTPD1             | 3.63 | 4.03 | 3.24 |
| OTTHUMG00000172090 | 3.63 | 4.23 | 3.16 |
| LINC00895          | 3.63 | 4.08 | 3.25 |
| C10orf112          | 3.63 | 4.14 | 3.26 |
| C1orf194           | 3.63 | 3.80 | 3.38 |
| EFCAB14-AS1        | 3.63 | 4.11 | 2.97 |
| SHISA6             | 3.63 | 3.99 | 3.35 |
| SCN9A              | 3.63 | 4.69 | 2.64 |
| OTTHUMG00000164154 | 3.63 | 4.12 | 3.27 |
| ABCA17P            | 3.63 | 4.33 | 3.26 |
| ZNF492             | 3.63 | 4.19 | 2.75 |
| LOC100272217       | 3.63 | 3.99 | 3.05 |
| TTK                | 3.63 | 4.26 | 3.21 |
| PTCHD1             | 3.63 | 4.60 | 3.20 |
| FCRL3              | 3.63 | 3.90 | 3.39 |
| DNAJC28            | 3.63 | 4.34 | 3.12 |
| PRR23B             | 3.63 | 4.07 | 3.09 |
| CCDC81             | 3.63 | 3.84 | 3.42 |
| OTTHUMG00000152555 | 3.63 | 4.43 | 3.28 |
| TMEM254-AS1        | 3.63 | 4.17 | 2.81 |
| LOC729558          | 3.63 | 4.09 | 3.03 |
| LOC100996721       | 3.63 | 4.39 | 2.84 |
| OTTHUMG00000161646 | 3.63 | 4.38 | 3.27 |
| ACPP               | 3.63 | 3.97 | 3.30 |
| OR5A2              | 3.63 | 4.63 | 2.86 |
| NLRP5              | 3.63 | 3.97 | 2.97 |
| CYP4F11            | 3.63 | 4.20 | 3.11 |
| FREM3              | 3.63 | 4.06 | 3.34 |
| ATP13A4            | 3.63 | 4.08 | 3.34 |
| OR5V1              | 3.63 | 4.11 | 2.97 |
| LOC100131257       | 3.63 | 4.08 | 3.36 |
| OTTHUMG00000012473 | 3.63 | 4.11 | 3.32 |
| OTX2               | 3.63 | 4.05 | 3.22 |
| TMEM246            | 3.63 | 3.92 | 3.44 |
| TMEM132D           | 3.63 | 3.88 | 3.46 |
| BST2               | 3.63 | 4.59 | 2.96 |
| TLR10              | 3.63 | 4.35 | 2.96 |
| GNN                | 3.63 | 3.92 | 3.28 |
| C16orf55           | 3.63 | 4.25 | 2.80 |
| SLC6A5             | 3.63 | 4.03 | 3.17 |
| OTTHUMG00000167328 | 3.63 | 4.11 | 3.27 |
| EOMES              | 3.63 | 3.98 | 3.41 |
| MIR4783            | 3.63 | 4.20 | 3.28 |
| OTTHUMG00000167185 | 3.63 | 3.84 | 3.25 |
| OTTHUMG00000151845 | 3.63 | 4.96 | 3.01 |
| BRIP1              | 3.63 | 3.99 | 3.28 |
| SEZ6               | 3.63 | 4.08 | 3.17 |
| RBFOX1             | 3.63 | 4.12 | 3.27 |

|                           |      |      |      |
|---------------------------|------|------|------|
| <i>BPIFA4P</i>            | 3.63 | 4.37 | 3.21 |
| <i>HIST1H4L</i>           | 3.63 | 4.60 | 2.84 |
| <i>NOC2L</i>              | 3.63 | 4.37 | 2.91 |
| <i>OTTHUMG00000156394</i> | 3.63 | 3.99 | 3.07 |
| <i>OTTHUMG00000168428</i> | 3.63 | 4.28 | 3.04 |
| <i>PTPRZ1</i>             | 3.63 | 5.29 | 2.91 |
| <i>OTTHUMG00000155789</i> | 3.63 | 4.03 | 2.99 |
| <i>SPATA3</i>             | 3.62 | 4.09 | 3.09 |
| <i>TMIGD2</i>             | 3.62 | 3.95 | 3.31 |
| <i>LOC100128264</i>       | 3.62 | 4.31 | 3.30 |
| <i>C18orf61</i>           | 3.62 | 4.10 | 3.28 |
| <i>LOC728537</i>          | 3.62 | 4.15 | 3.07 |
| <i>SYN2</i>               | 3.62 | 4.29 | 3.01 |
| <i>GAS2</i>               | 3.62 | 4.09 | 3.13 |
| <i>LCE2B</i>              | 3.62 | 4.82 | 3.03 |
| <i>OR2V1</i>              | 3.62 | 4.07 | 2.90 |
| <i>TMEM170B</i>           | 3.62 | 3.89 | 3.30 |
| <i>C3orf80</i>            | 3.62 | 4.14 | 3.26 |
| <i>NPY</i>                | 3.62 | 4.04 | 3.31 |
| <i>ZNF714</i>             | 3.62 | 3.94 | 2.71 |
| <i>LOC100505875</i>       | 3.62 | 4.39 | 3.07 |
| <i>DAW1</i>               | 3.62 | 3.89 | 3.11 |
| <i>SYT4</i>               | 3.62 | 4.11 | 2.97 |
| <i>NTN5</i>               | 3.62 | 3.82 | 3.24 |
| <i>OTTHUMG00000017032</i> | 3.62 | 4.02 | 3.30 |
| <i>OTTHUMG00000159050</i> | 3.62 | 4.21 | 3.25 |
| <i>LOC100507224</i>       | 3.62 | 4.46 | 2.46 |
| <i>LOC100506810</i>       | 3.62 | 3.82 | 3.35 |
| <i>POU5F1B</i>            | 3.62 | 4.14 | 2.95 |
| <i>RNA5SP30</i>           | 3.62 | 4.44 | 2.94 |
| <i>RNA5SP491</i>          | 3.62 | 3.89 | 3.19 |
| <i>ARL5C</i>              | 3.62 | 4.12 | 3.34 |
| <i>OTTHUMG00000017159</i> | 3.62 | 4.06 | 3.02 |
| <i>KRT38</i>              | 3.62 | 4.49 | 3.16 |
| <i>MIR1185-2</i>          | 3.62 | 4.26 | 2.64 |
| <i>LOC400891</i>          | 3.62 | 4.07 | 3.31 |
| <i>LOC91548</i>           | 3.62 | 4.36 | 3.23 |
| <i>OTTHUMG00000164849</i> | 3.62 | 4.21 | 3.09 |
| <i>LOC285000</i>          | 3.62 | 3.89 | 3.31 |
| <i>SLFN12L</i>            | 3.62 | 4.09 | 3.24 |
| <i>HCFC1-AS1</i>          | 3.62 | 4.02 | 3.05 |
| <i>LOC100128253</i>       | 3.62 | 3.84 | 3.39 |
| <i>OTTHUMG00000034985</i> | 3.62 | 3.97 | 3.26 |
| <i>MIR4325</i>            | 3.62 | 4.72 | 2.81 |
| <i>IL33</i>               | 3.62 | 4.10 | 3.13 |
| <i>OTTHUMG00000164213</i> | 3.62 | 4.08 | 3.04 |
| <i>KIAA1239</i>           | 3.62 | 4.02 | 3.02 |
| <i>SPANXN4</i>            | 3.62 | 4.03 | 3.04 |
| <i>OTTHUMG00000008374</i> | 3.62 | 4.52 | 2.51 |

|                    |      |      |      |
|--------------------|------|------|------|
| MIR601             | 3.62 | 4.60 | 2.95 |
| OR2W1              | 3.62 | 4.01 | 3.16 |
| OTTHUMG00000153380 | 3.61 | 4.13 | 2.93 |
| RNASE9             | 3.61 | 3.97 | 3.28 |
| OTTHUMG00000172166 | 3.61 | 4.20 | 3.08 |
| MIR223             | 3.61 | 3.84 | 3.30 |
| TMPRSS12           | 3.61 | 3.91 | 3.31 |
| CD3E               | 3.61 | 4.30 | 3.12 |
| IVL                | 3.61 | 4.08 | 3.09 |
| KIF14              | 3.61 | 4.27 | 3.17 |
| UGT1A9             | 3.61 | 4.08 | 3.20 |
| CECR3              | 3.61 | 4.30 | 2.87 |
| LINC00543          | 3.61 | 4.08 | 3.22 |
| C1orf87            | 3.61 | 3.99 | 3.23 |
| SNORA26            | 3.61 | 4.30 | 3.21 |
| GFI1               | 3.61 | 4.07 | 2.85 |
| TNFSF18            | 3.61 | 3.91 | 3.07 |
| HOXB-AS2           | 3.61 | 4.05 | 2.97 |
| OTTHUMG00000066730 | 3.61 | 3.94 | 2.98 |
| CDC25C             | 3.61 | 3.97 | 3.29 |
| PRICKLE2-AS2       | 3.61 | 4.30 | 3.38 |
| MYO1A              | 3.61 | 3.90 | 3.47 |
| OTTHUMG00000163155 | 3.61 | 4.10 | 3.28 |
| AQP7P1             | 3.61 | 4.45 | 2.90 |
| MS4A4E             | 3.61 | 4.88 | 2.75 |
| MIR219-2           | 3.61 | 4.29 | 2.73 |
| LOC100130548       | 3.61 | 4.20 | 3.23 |
| LOC100652931       | 3.61 | 4.41 | 3.05 |
| LOC442497          | 3.61 | 4.22 | 3.15 |
| GCM1               | 3.61 | 3.85 | 3.13 |
| RGS4               | 3.61 | 4.20 | 3.15 |
| EIF5AL1            | 3.61 | 4.08 | 2.87 |
| OTTHUMG00000171909 | 3.61 | 4.09 | 3.14 |
| OTTHUMG00000162820 | 3.61 | 4.30 | 2.51 |
| TMEM212-AS1        | 3.61 | 4.16 | 3.15 |
| FLJ43585           | 3.61 | 3.97 | 3.41 |
| OTTHUMG00000007957 | 3.61 | 4.03 | 3.15 |
| FLJ26850           | 3.61 | 4.03 | 3.13 |
| OTTHUMG00000182110 | 3.61 | 4.08 | 3.13 |
| ATP1B3-AS1         | 3.61 | 4.29 | 3.20 |
| PRSS58             | 3.61 | 3.92 | 3.37 |
| TMEM102            | 3.61 | 4.35 | 2.98 |
| DKFZp564H213       | 3.61 | 3.98 | 3.14 |
| TRBV6-7            | 3.61 | 4.20 | 3.27 |
| MIR573             | 3.61 | 4.51 | 2.68 |
| TTC3-AS1           | 3.61 | 4.06 | 3.15 |
| MAGEC3             | 3.61 | 3.80 | 3.45 |
| CXorf28            | 3.61 | 4.43 | 3.19 |
| OTTHUMG00000171092 | 3.61 | 4.12 | 3.22 |

|                    |      |      |      |
|--------------------|------|------|------|
| NCAM2              | 3.61 | 3.88 | 3.35 |
| C1orf186           | 3.60 | 4.36 | 3.03 |
| MARVELD3           | 3.60 | 3.85 | 3.19 |
| OTTHUMG00000158832 | 3.60 | 4.15 | 3.29 |
| FETUB              | 3.60 | 4.05 | 3.20 |
| OTTHUMG00000169106 | 3.60 | 4.10 | 2.93 |
| KRT2               | 3.60 | 4.35 | 3.31 |
| CYorf17            | 3.60 | 4.15 | 3.22 |
| LINC00356          | 3.60 | 4.18 | 3.27 |
| TRIM64B            | 3.60 | 3.97 | 3.11 |
| LINC00694          | 3.60 | 3.95 | 3.16 |
| LOC730338          | 3.60 | 3.86 | 3.32 |
| OTTHUMG00000155390 | 3.60 | 4.27 | 3.07 |
| FLJ45256           | 3.60 | 3.86 | 3.37 |
| CCR4               | 3.60 | 4.14 | 3.07 |
| ASCL2              | 3.60 | 4.05 | 3.11 |
| MIR3164            | 3.60 | 4.21 | 3.28 |
| EML5               | 3.60 | 4.06 | 3.32 |
| ANKRD20A5P         | 3.60 | 4.58 | 2.68 |
| FNDC7              | 3.60 | 4.37 | 3.07 |
| OTTHUMG00000014234 | 3.60 | 4.12 | 3.23 |
| SPATA31D1          | 3.60 | 4.28 | 2.91 |
| CACNA1S            | 3.60 | 4.05 | 3.25 |
| KRTAP2-2           | 3.60 | 4.36 | 2.75 |
| NCALD              | 3.60 | 3.93 | 3.14 |
| SMCP               | 3.60 | 4.19 | 3.30 |
| E2F6               | 3.60 | 3.97 | 3.32 |
| OTTHUMG00000017551 | 3.60 | 4.04 | 3.14 |
| LYZL6              | 3.60 | 4.31 | 3.03 |
| LINC00929          | 3.60 | 4.37 | 3.19 |
| WNK3               | 3.60 | 4.08 | 3.08 |
| LOC100507221       | 3.60 | 3.98 | 2.92 |
| LYRM5              | 3.60 | 4.10 | 3.11 |
| APOBEC4            | 3.60 | 4.06 | 3.20 |
| TRBV2              | 3.60 | 4.02 | 3.30 |
| LOC151484          | 3.60 | 4.05 | 3.15 |
| CACNA1C-AS3        | 3.60 | 4.36 | 3.18 |
| EPB41L4B           | 3.60 | 4.05 | 3.30 |
| ASTL               | 3.60 | 3.75 | 3.22 |
| MIR1260B           | 3.60 | 4.37 | 3.12 |
| HFE2               | 3.60 | 3.90 | 3.10 |
| MIR31HG            | 3.60 | 4.79 | 2.57 |
| IQCH               | 3.60 | 3.76 | 3.46 |
| NLRP9              | 3.60 | 4.23 | 3.04 |
| PCDHA11            | 3.60 | 3.78 | 3.47 |
| OTTHUMG00000164265 | 3.60 | 4.07 | 2.79 |
| OTTHUMG00000166054 | 3.60 | 4.34 | 3.10 |
| ZNRF3              | 3.60 | 4.06 | 3.29 |
| OTTHUMG00000022289 | 3.60 | 3.81 | 3.30 |

|                           |      |      |      |
|---------------------------|------|------|------|
| <i>IQUB</i>               | 3.60 | 3.76 | 3.40 |
| <i>OTTHUMG00000160859</i> | 3.60 | 4.80 | 2.02 |
| <i>NFE2</i>               | 3.60 | 4.19 | 3.16 |
| <i>OTTHUMG00000016932</i> | 3.60 | 4.05 | 3.17 |
| <i>MGC27382</i>           | 3.59 | 4.41 | 3.23 |
| <i>LOC401286</i>          | 3.59 | 4.36 | 3.01 |
| <i>PCDH8</i>              | 3.59 | 3.90 | 3.23 |
| <i>SPOCK3</i>             | 3.59 | 4.24 | 3.06 |
| <i>RNA5SP175</i>          | 3.59 | 3.89 | 3.12 |
| <i>GIN1</i>               | 3.59 | 4.57 | 3.13 |
| <i>LNX1-AS2</i>           | 3.59 | 4.33 | 3.20 |
| <i>SDIM1</i>              | 3.59 | 4.18 | 3.21 |
| <i>LINC00626</i>          | 3.59 | 4.54 | 3.18 |
| <i>LOC730441</i>          | 3.59 | 4.22 | 3.45 |
| <i>C1orf173</i>           | 3.59 | 4.35 | 3.01 |
| <i>KLHL1</i>              | 3.59 | 4.20 | 3.16 |
| <i>COL4A6</i>             | 3.59 | 4.10 | 2.99 |
| <i>LOC285419</i>          | 3.59 | 4.10 | 3.01 |
| <i>SLAMF6</i>             | 3.59 | 3.97 | 3.16 |
| <i>CXorf64</i>            | 3.59 | 3.95 | 3.16 |
| <i>DNTT</i>               | 3.59 | 3.94 | 3.25 |
| <i>RIMBP2</i>             | 3.59 | 3.97 | 3.29 |
| <i>LOC284240</i>          | 3.59 | 3.99 | 3.15 |
| <i>EMX2</i>               | 3.59 | 3.85 | 3.19 |
| <i>SYT16</i>              | 3.59 | 3.88 | 3.33 |
| <i>ZAR1L</i>              | 3.59 | 4.00 | 3.12 |
| <i>OTTHUMG00000166335</i> | 3.59 | 4.00 | 3.09 |
| <i>DEC1</i>               | 3.59 | 3.89 | 3.36 |
| <i>LOC100505633</i>       | 3.59 | 4.06 | 3.05 |
| <i>PGBD5</i>              | 3.59 | 4.03 | 3.22 |
| <i>CARTPT</i>             | 3.59 | 4.08 | 3.01 |
| <i>LOC100507642</i>       | 3.59 | 3.97 | 3.26 |
| <i>OTTHUMG00000171799</i> | 3.59 | 3.89 | 3.36 |
| <i>LINC00208</i>          | 3.59 | 3.92 | 3.33 |
| <i>EPHX4</i>              | 3.59 | 3.96 | 3.07 |
| <i>PEX5L</i>              | 3.59 | 4.13 | 3.14 |
| <i>PABPN1L</i>            | 3.59 | 3.88 | 3.06 |
| <i>AJAP1</i>              | 3.59 | 3.91 | 3.34 |
| <i>KBTD8</i>              | 3.59 | 3.95 | 3.19 |
| <i>SLC25A52</i>           | 3.59 | 4.48 | 3.08 |
| <i>LOC100132077</i>       | 3.59 | 3.95 | 3.10 |
| <i>CYP11A1</i>            | 3.59 | 4.12 | 3.32 |
| <i>OTTHUMG00000170677</i> | 3.59 | 4.01 | 2.93 |
| <i>MIR4661</i>            | 3.59 | 4.10 | 2.94 |
| <i>MGC2889</i>            | 3.59 | 4.15 | 3.07 |
| <i>WDR64</i>              | 3.59 | 3.91 | 3.24 |
| <i>OTTHUMG00000161704</i> | 3.59 | 4.32 | 3.12 |
| <i>SKOR1</i>              | 3.59 | 3.94 | 3.35 |
| <i>CBY3</i>               | 3.58 | 4.01 | 3.21 |

|                    |      |      |      |
|--------------------|------|------|------|
| LOC401312          | 3.58 | 4.22 | 2.98 |
| TRIM55             | 3.58 | 4.32 | 3.00 |
| ASH1L-IT1          | 3.58 | 4.04 | 3.23 |
| PADI1              | 3.58 | 4.00 | 3.30 |
| DAPL1              | 3.58 | 4.45 | 3.06 |
| GRXCR2             | 3.58 | 4.24 | 3.05 |
| PPP2R2B            | 3.58 | 4.12 | 3.33 |
| LOC100289333       | 3.58 | 3.83 | 3.26 |
| TRPM3              | 3.58 | 4.08 | 3.13 |
| OTTHUMG00000140195 | 3.58 | 4.19 | 3.20 |
| RNU5E-1            | 3.58 | 4.13 | 3.06 |
| OTTHUMG00000021379 | 3.58 | 3.89 | 3.37 |
| OTTHUMG00000008994 | 3.58 | 4.02 | 3.18 |
| KCNJ3              | 3.58 | 3.97 | 3.19 |
| OTTHUMG00000180720 | 3.58 | 4.00 | 3.07 |
| CEACAM4            | 3.58 | 3.94 | 3.11 |
| LOC100652736       | 3.58 | 3.91 | 3.06 |
| OTTHUMG00000150950 | 3.58 | 4.04 | 3.21 |
| PVRL3-AS1          | 3.58 | 3.86 | 3.23 |
| C4orf26            | 3.58 | 3.92 | 3.26 |
| BSPH1              | 3.58 | 4.19 | 3.15 |
| OTTHUMG00000066367 | 3.58 | 3.94 | 2.83 |
| GPR151             | 3.58 | 4.12 | 3.26 |
| LINC00552          | 3.58 | 4.11 | 2.94 |
| LINC00240          | 3.58 | 4.31 | 3.09 |
| OTTHUMG00000031891 | 3.58 | 4.25 | 3.19 |
| OTTHUMG00000162061 | 3.58 | 4.09 | 2.96 |
| ANKRD20A11P        | 3.58 | 4.36 | 2.73 |
| GPR115             | 3.58 | 4.16 | 3.23 |
| CCDC141            | 3.58 | 4.08 | 3.06 |
| OTTHUMG00000153631 | 3.58 | 3.83 | 3.27 |
| OTTHUMG00000022458 | 3.58 | 4.10 | 3.10 |
| ERMN               | 3.58 | 4.12 | 3.26 |
| LOC100506647       | 3.58 | 4.15 | 3.06 |
| RNA5SP422          | 3.58 | 5.24 | 2.75 |
| ZNF749             | 3.58 | 4.15 | 3.36 |
| OTTHUMG00000037424 | 3.58 | 4.14 | 3.00 |
| TJP3               | 3.58 | 3.98 | 3.14 |
| HS3ST5             | 3.58 | 4.23 | 2.99 |
| MIR635             | 3.58 | 4.49 | 2.43 |
| FTO-IT1            | 3.58 | 4.03 | 3.15 |
| LOC100128988       | 3.58 | 4.19 | 3.19 |
| LOC100506098       | 3.58 | 3.91 | 3.09 |
| MOSPD1             | 3.58 | 4.36 | 3.05 |
| OR6B2              | 3.58 | 4.06 | 2.98 |
| CENPQ              | 3.58 | 3.95 | 3.21 |
| OTTHUMG00000018050 | 3.58 | 4.07 | 3.10 |
| PCED1B-AS1         | 3.58 | 4.18 | 3.09 |
| MIR302B            | 3.57 | 3.90 | 3.26 |

|                    |      |      |      |
|--------------------|------|------|------|
| ARL11              | 3.57 | 3.83 | 3.06 |
| ADAM30             | 3.57 | 4.01 | 2.98 |
| OTTHUMG00000154784 | 3.57 | 3.96 | 3.02 |
| OTTHUMG00000162104 | 3.57 | 4.16 | 3.23 |
| HYLS1              | 3.57 | 3.90 | 3.14 |
| ATP2C2             | 3.57 | 4.00 | 3.38 |
| SLC8A1-AS1         | 3.57 | 4.48 | 3.07 |
| LOC100131174       | 3.57 | 4.17 | 2.36 |
| NXPE1              | 3.57 | 3.91 | 3.12 |
| RNU6-76P           | 3.57 | 4.28 | 3.12 |
| SPAG17             | 3.57 | 4.08 | 2.94 |
| KIF18A             | 3.57 | 4.04 | 3.11 |
| LOC400940          | 3.57 | 3.88 | 3.22 |
| SLC10A6            | 3.57 | 4.44 | 3.20 |
| OTTHUMG00000009684 | 3.57 | 4.29 | 3.05 |
| OTTHUMG00000155998 | 3.57 | 4.02 | 3.10 |
| LOC613126          | 3.57 | 4.00 | 3.19 |
| KLHL4              | 3.57 | 4.42 | 3.19 |
| MS4A3              | 3.57 | 4.19 | 3.14 |
| DNAH3              | 3.57 | 4.07 | 3.01 |
| ADCY10             | 3.57 | 4.06 | 3.10 |
| MYO16              | 3.57 | 3.92 | 3.29 |
| NECAB1             | 3.57 | 3.95 | 3.09 |
| PSG4               | 3.57 | 4.47 | 2.55 |
| KRTAP3-1           | 3.57 | 4.21 | 3.22 |
| C9orf153           | 3.57 | 4.09 | 3.19 |
| UGT2A3             | 3.57 | 3.85 | 3.20 |
| GLRA1              | 3.57 | 4.05 | 2.94 |
| POLQ               | 3.57 | 3.84 | 3.21 |
| OTTHUMG00000163261 | 3.57 | 4.09 | 3.18 |
| RPGRIP1            | 3.57 | 3.95 | 3.10 |
| OTTHUMG00000155116 | 3.57 | 4.25 | 3.15 |
| HRASLS2            | 3.57 | 4.14 | 2.88 |
| HAPLN2             | 3.57 | 3.78 | 3.24 |
| FAM26D             | 3.57 | 3.82 | 3.20 |
| FBLIM1             | 3.57 | 3.88 | 3.04 |
| ZG16               | 3.57 | 4.28 | 3.21 |
| C11orf70           | 3.57 | 3.91 | 3.17 |
| OTTHUMG00000032029 | 3.57 | 4.05 | 3.14 |
| LAMP3              | 3.57 | 3.95 | 3.38 |
| IL12B              | 3.57 | 4.07 | 3.19 |
| OTTHUMG00000169446 | 3.57 | 4.12 | 3.04 |
| SPZ1               | 3.57 | 4.08 | 3.11 |
| SPINT4             | 3.57 | 4.20 | 2.66 |
| A1CF               | 3.57 | 3.95 | 3.16 |
| IRGC               | 3.57 | 4.24 | 2.99 |
| TMEM207            | 3.57 | 3.90 | 3.18 |
| KCNV2              | 3.57 | 4.07 | 3.13 |
| SLC6A11            | 3.56 | 4.26 | 2.96 |



|                     |      |      |      |
|---------------------|------|------|------|
| FLJ45743            | 3.56 | 4.09 | 2.90 |
| TMPRSS15            | 3.56 | 3.96 | 3.25 |
| SLC44A4             | 3.56 | 3.93 | 3.06 |
| C6orf58             | 3.56 | 4.18 | 3.23 |
| ANXA2P3             | 3.56 | 4.10 | 2.70 |
| OTTHUMG00000016019  | 3.56 | 4.11 | 3.11 |
| NR2E1               | 3.56 | 4.24 | 3.26 |
| RNU4ATAC            | 3.56 | 4.59 | 2.22 |
| CHRM3-AS1           | 3.56 | 3.88 | 3.22 |
| HAL                 | 3.56 | 4.15 | 2.98 |
| IGKV3D-11           | 3.56 | 4.00 | 3.14 |
| OTTHUMG000000155653 | 3.56 | 4.02 | 3.16 |
| GLYAT               | 3.56 | 4.10 | 2.83 |
| STPG2               | 3.56 | 4.11 | 3.08 |
| SLC35F4             | 3.56 | 3.95 | 3.19 |
| CYP26C1             | 3.56 | 3.87 | 3.35 |
| OTTHUMG000000163048 | 3.56 | 4.16 | 3.06 |
| TNFRSF9             | 3.56 | 4.09 | 2.90 |
| OR6T1               | 3.56 | 4.64 | 3.05 |
| SMC1B               | 3.56 | 4.19 | 2.98 |
| OTTHUMG000000163315 | 3.56 | 3.99 | 3.07 |
| BFSP2               | 3.56 | 4.19 | 3.08 |
| DKFZP686I15217      | 3.56 | 3.93 | 3.18 |
| SPAG6               | 3.56 | 4.03 | 3.23 |
| USP46-AS1           | 3.56 | 3.95 | 3.01 |
| GTSF1L              | 3.56 | 3.89 | 3.26 |
| ZBTB20-AS3          | 3.56 | 4.01 | 3.02 |
| PDZRN4              | 3.56 | 4.14 | 3.17 |
| REP15               | 3.56 | 4.30 | 2.73 |
| TEX28               | 3.56 | 4.27 | 3.19 |
| SNORD126            | 3.56 | 4.21 | 2.87 |
| TMEM151A            | 3.56 | 3.80 | 3.24 |
| WDR96               | 3.56 | 3.85 | 3.10 |
| CHL1                | 3.56 | 3.84 | 3.19 |
| LOC100129726        | 3.56 | 4.00 | 3.29 |
| AK5                 | 3.56 | 4.46 | 3.13 |
| MIR550A1            | 3.56 | 4.37 | 2.33 |
| OTTHUMG000000151705 | 3.56 | 3.98 | 2.98 |
| RNF175              | 3.56 | 4.20 | 2.97 |
| ZNF280A             | 3.56 | 4.09 | 3.17 |
| LINC00535           | 3.56 | 3.95 | 2.85 |
| PRAMEF2             | 3.56 | 4.32 | 2.87 |
| RNU7-67P            | 3.56 | 4.11 | 2.73 |
| LRRC69              | 3.56 | 4.06 | 3.28 |
| OTTHUMG000000161775 | 3.56 | 3.95 | 3.18 |
| ADAMDEC1            | 3.56 | 4.24 | 3.18 |
| OTTHUMG000000163515 | 3.56 | 4.40 | 3.21 |
| HCG24               | 3.56 | 4.15 | 3.12 |
| OTTHUMG000000172472 | 3.56 | 4.76 | 2.72 |

|                    |      |      |      |
|--------------------|------|------|------|
| MIR3193            | 3.56 | 4.53 | 2.64 |
| OTTHUMG00000042022 | 3.56 | 4.02 | 3.17 |
| TFAP2B             | 3.56 | 3.92 | 3.02 |
| OTTHUMG00000132305 | 3.56 | 4.22 | 3.24 |
| GABRA3             | 3.56 | 4.11 | 3.20 |
| PATE1              | 3.56 | 3.87 | 3.29 |
| PEX11A             | 3.56 | 4.02 | 3.16 |
| OTTHUMG00000160700 | 3.56 | 4.10 | 3.19 |
| MC3R               | 3.56 | 4.07 | 2.61 |
| MIR4715            | 3.55 | 4.09 | 2.82 |
| TRIML1             | 3.55 | 4.23 | 3.26 |
| OTTHUMG00000164853 | 3.55 | 4.33 | 3.02 |
| OR52E4             | 3.55 | 4.28 | 3.05 |
| LOC100506255       | 3.55 | 4.28 | 3.14 |
| OTTHUMG00000153649 | 3.55 | 3.95 | 3.25 |
| OTTHUMG00000020177 | 3.55 | 3.94 | 3.12 |
| OTTHUMG00000162491 | 3.55 | 4.12 | 3.08 |
| FDPSP2             | 3.55 | 4.30 | 2.74 |
| LOC389705          | 3.55 | 4.20 | 2.88 |
| PCLO               | 3.55 | 4.09 | 2.97 |
| RNY4P23            | 3.55 | 4.33 | 2.76 |
| MIR1288            | 3.55 | 4.40 | 3.15 |
| OTTHUMG00000154620 | 3.55 | 4.69 | 2.70 |
| H2BFM              | 3.55 | 4.07 | 3.23 |
| ABCA12             | 3.55 | 3.85 | 3.25 |
| OTTHUMG00000157151 | 3.55 | 4.00 | 3.06 |
| KCNIP4-IT1         | 3.55 | 4.18 | 3.16 |
| MAP2K4P1           | 3.55 | 4.23 | 3.00 |
| DAPP1              | 3.55 | 4.13 | 3.18 |
| OTTHUMG00000164760 | 3.55 | 4.36 | 2.93 |
| CYP19A1            | 3.55 | 3.96 | 3.27 |
| OTTHUMG00000170089 | 3.55 | 4.12 | 2.87 |
| OR13F1             | 3.55 | 5.14 | 2.87 |
| SLC10A5            | 3.55 | 4.13 | 3.16 |
| LOC441179          | 3.55 | 3.95 | 2.92 |
| LOC400654          | 3.55 | 4.13 | 3.26 |
| RNA5SP354          | 3.55 | 4.31 | 3.10 |
| ISL1               | 3.55 | 4.01 | 3.17 |
| FAM9B              | 3.55 | 3.98 | 3.26 |
| WNT5A              | 3.55 | 4.38 | 3.10 |
| LOC100289650       | 3.55 | 4.10 | 2.87 |
| OTTHUMG00000163011 | 3.55 | 3.98 | 3.22 |
| FOLR3              | 3.55 | 3.89 | 3.26 |
| MIR3170            | 3.55 | 4.54 | 2.51 |
| CREG2              | 3.55 | 4.43 | 3.10 |
| FRMPD1             | 3.55 | 3.95 | 3.17 |
| MYOZ2              | 3.55 | 4.15 | 3.10 |
| FLJ45831           | 3.55 | 4.04 | 3.08 |
| TCF21              | 3.55 | 4.34 | 3.16 |

|                    |      |      |      |
|--------------------|------|------|------|
| OTTHUMG00000168839 | 3.55 | 3.95 | 2.70 |
| OTTHUMG00000177332 | 3.55 | 4.16 | 3.15 |
| MSGN1              | 3.55 | 3.87 | 3.27 |
| LOC100506472       | 3.55 | 4.36 | 2.85 |
| OR4C5              | 3.55 | 4.06 | 2.98 |
| OR5M1              | 3.55 | 4.31 | 2.79 |
| OTTHUMG00000163986 | 3.55 | 3.78 | 3.32 |
| LOC100506514       | 3.54 | 4.07 | 2.93 |
| FAM84B             | 3.54 | 3.89 | 3.28 |
| MIR3665            | 3.54 | 4.74 | 2.40 |
| RN7SKP9            | 3.54 | 4.41 | 2.93 |
| OR8B4              | 3.54 | 4.10 | 3.22 |
| LOC100507261       | 3.54 | 4.44 | 2.95 |
| MIR515-1           | 3.54 | 4.59 | 2.66 |
| RNF208             | 3.54 | 3.73 | 3.19 |
| DMRTA2             | 3.54 | 3.81 | 3.23 |
| OTTHUMG00000156392 | 3.54 | 4.10 | 2.98 |
| CLDN16             | 3.54 | 3.98 | 3.15 |
| OTTHUMG00000159628 | 3.54 | 4.08 | 3.13 |
| LCN10              | 3.54 | 4.24 | 3.09 |
| MIR4789            | 3.54 | 4.04 | 2.86 |
| IGF2BP3            | 3.54 | 3.96 | 3.18 |
| DGCR9              | 3.54 | 3.97 | 2.75 |
| LINC00361          | 3.54 | 4.29 | 3.26 |
| MIR4653            | 3.54 | 4.21 | 1.95 |
| GCM2               | 3.54 | 3.98 | 3.10 |
| ZNF566             | 3.54 | 4.03 | 3.10 |
| OTTHUMG00000017590 | 3.54 | 3.93 | 3.00 |
| LINC00331          | 3.54 | 4.48 | 3.09 |
| CAMK4              | 3.54 | 3.83 | 3.27 |
| PAQR9              | 3.54 | 3.94 | 2.97 |
| IL20RB-AS1         | 3.54 | 4.58 | 3.00 |
| PNPLA5             | 3.54 | 4.16 | 3.20 |
| CC2D2B             | 3.54 | 4.09 | 3.28 |
| PARPBP             | 3.54 | 3.96 | 2.94 |
| LINC00700          | 3.54 | 4.00 | 3.29 |
| OTTHUMG00000180543 | 3.54 | 3.94 | 3.20 |
| IL18RAP            | 3.54 | 3.89 | 3.37 |
| OTTHUMG00000171831 | 3.54 | 4.38 | 2.78 |
| C6orf99            | 3.54 | 3.94 | 3.35 |
| RBM22P1            | 3.54 | 4.22 | 2.93 |
| OTTHUMG00000164531 | 3.54 | 4.99 | 2.55 |
| OTTHUMG00000179655 | 3.54 | 4.32 | 2.80 |
| OTTHUMG00000179489 | 3.54 | 3.99 | 3.18 |
| C10orf120          | 3.54 | 3.77 | 3.01 |
| MIR670             | 3.54 | 4.10 | 3.15 |
| WWC2-AS2           | 3.54 | 3.80 | 3.25 |
| OTTHUMG00000151750 | 3.54 | 3.85 | 3.19 |
| NRON               | 3.54 | 4.25 | 2.99 |

|                    |      |      |      |
|--------------------|------|------|------|
| LINC00966          | 3.54 | 4.10 | 2.84 |
| GPR32              | 3.54 | 3.87 | 3.11 |
| TGM3               | 3.53 | 3.79 | 3.20 |
| ASB4               | 3.53 | 4.37 | 2.97 |
| MIR4496            | 3.53 | 3.92 | 3.36 |
| ZSCAN31            | 3.53 | 3.83 | 2.86 |
| FAM83F             | 3.53 | 4.12 | 3.17 |
| OTTHUMG00000041155 | 3.53 | 4.11 | 3.13 |
| LINC00524          | 3.53 | 4.06 | 3.06 |
| OTTHUMG00000171853 | 3.53 | 4.39 | 2.80 |
| LIN28A             | 3.53 | 4.08 | 3.13 |
| ITCH-AS1           | 3.53 | 3.99 | 3.28 |
| TRAJ4              | 3.53 | 4.50 | 2.73 |
| LINC00892          | 3.53 | 3.99 | 2.75 |
| TPH1               | 3.53 | 3.75 | 3.34 |
| MIR215             | 3.53 | 4.56 | 2.87 |
| RASA2-IT1          | 3.53 | 4.18 | 2.93 |
| FAM186A            | 3.53 | 3.89 | 3.04 |
| C1orf180           | 3.53 | 4.38 | 3.03 |
| OR5211             | 3.53 | 4.04 | 3.11 |
| OTTHUMG00000017646 | 3.53 | 3.88 | 2.73 |
| DPRXP4             | 3.53 | 4.43 | 2.51 |
| OVOS2              | 3.53 | 5.26 | 2.82 |
| LOC654841          | 3.53 | 3.93 | 3.25 |
| CPS1-IT1           | 3.53 | 3.97 | 2.97 |
| TP73               | 3.53 | 4.06 | 3.30 |
| MIR181A2           | 3.53 | 3.82 | 3.20 |
| LOC254099          | 3.53 | 3.79 | 3.17 |
| STK31              | 3.53 | 3.85 | 3.06 |
| OTTHUMG00000165266 | 3.53 | 4.09 | 3.15 |
| OTTHUMG00000037125 | 3.53 | 4.47 | 2.72 |
| DKFZp686L13185     | 3.53 | 3.85 | 3.18 |
| SLC15A2            | 3.53 | 3.87 | 3.10 |
| OTTHUMG00000162462 | 3.53 | 4.39 | 2.86 |
| LOC728463          | 3.53 | 4.31 | 3.18 |
| OTTHUMG00000162825 | 3.53 | 3.95 | 3.07 |
| OTTHUMG00000162631 | 3.53 | 4.31 | 2.98 |
| LOC285762          | 3.53 | 3.91 | 3.03 |
| LRRC43             | 3.53 | 4.29 | 3.07 |
| MIR378F            | 3.53 | 4.34 | 2.67 |
| LINC00941          | 3.53 | 3.95 | 3.10 |
| OTTHUMG00000041032 | 3.53 | 4.43 | 2.37 |
| OTTHUMG00000020689 | 3.53 | 3.94 | 3.15 |
| CST13P             | 3.53 | 3.90 | 3.23 |
| LOC100996447       | 3.53 | 3.89 | 3.18 |
| FAAH2              | 3.53 | 4.02 | 2.91 |
| CCNE1              | 3.53 | 4.10 | 3.16 |
| LOC100505903       | 3.53 | 4.03 | 3.17 |
| IZUMO2             | 3.53 | 3.88 | 3.04 |

|                    |      |      |      |
|--------------------|------|------|------|
| SLC17A6            | 3.53 | 4.24 | 3.09 |
| OTTHUMG00000163746 | 3.53 | 4.01 | 3.08 |
| SOX14              | 3.53 | 3.95 | 3.10 |
| STRA8              | 3.52 | 4.01 | 3.25 |
| MPC1L              | 3.52 | 4.07 | 2.94 |
| OR2A12             | 3.52 | 4.10 | 3.27 |
| OTTHUMG00000024097 | 3.52 | 3.96 | 3.21 |
| KRT76              | 3.52 | 4.09 | 2.77 |
| SNORD115-32        | 3.52 | 5.01 | 3.02 |
| OTTHUMG00000014802 | 3.52 | 4.21 | 3.10 |
| C6orf163           | 3.52 | 4.08 | 2.84 |
| DCD                | 3.52 | 3.92 | 3.13 |
| OTTHUMG00000170230 | 3.52 | 4.30 | 2.70 |
| CDC14B             | 3.52 | 4.05 | 2.90 |
| MIR323B            | 3.52 | 4.21 | 2.84 |
| LINC00461          | 3.52 | 3.78 | 3.27 |
| DMGDH              | 3.52 | 3.98 | 3.04 |
| OTTHUMG00000055981 | 3.52 | 3.92 | 2.94 |
| OTTHUMG00000168862 | 3.52 | 4.32 | 3.10 |
| C9orf135-AS1       | 3.52 | 4.21 | 3.09 |
| CSTF3-AS1          | 3.52 | 3.90 | 3.21 |
| RNA5SP487          | 3.52 | 3.99 | 3.03 |
| PTENP1             | 3.52 | 4.18 | 2.35 |
| FOLH1              | 3.52 | 4.66 | 2.60 |
| SORCS3-AS1         | 3.52 | 3.75 | 3.21 |
| MIR30C2            | 3.52 | 4.49 | 3.00 |
| C4orf51            | 3.52 | 3.90 | 3.05 |
| CA6                | 3.52 | 4.05 | 3.14 |
| NWD1               | 3.52 | 3.92 | 2.87 |
| OTTHUMG00000161379 | 3.52 | 4.09 | 2.73 |
| ZAR1               | 3.52 | 3.91 | 3.13 |
| VPREB3             | 3.52 | 3.82 | 3.18 |
| CCDC138            | 3.52 | 4.13 | 2.96 |
| C13orf35           | 3.52 | 3.99 | 3.14 |
| MAEL               | 3.52 | 3.75 | 3.23 |
| ANKFN1             | 3.52 | 4.16 | 2.96 |
| LOC340581          | 3.52 | 3.98 | 3.05 |
| TLL2               | 3.52 | 4.10 | 3.17 |
| SYCP3              | 3.52 | 4.03 | 2.86 |
| OTTHUMG00000020194 | 3.52 | 3.93 | 3.26 |
| LOC440600          | 3.52 | 4.21 | 2.72 |
| LOC285593          | 3.52 | 3.83 | 3.25 |
| CRCT1              | 3.52 | 3.82 | 3.17 |
| MIR518B            | 3.52 | 4.38 | 2.43 |
| CST5               | 3.52 | 3.84 | 3.34 |
| MIR4636            | 3.52 | 4.23 | 2.74 |
| GATA3-AS1          | 3.52 | 3.82 | 3.38 |
| OTTHUMG00000172229 | 3.52 | 3.96 | 3.07 |
| SCGN               | 3.52 | 3.84 | 3.18 |

|                    |      |      |      |
|--------------------|------|------|------|
| ALDOB              | 3.52 | 3.91 | 3.15 |
| NPSR1              | 3.52 | 3.83 | 3.20 |
| PGM5P2             | 3.52 | 4.01 | 2.95 |
| VHLL               | 3.52 | 3.97 | 3.07 |
| MIR373             | 3.52 | 4.35 | 2.45 |
| TEX12              | 3.52 | 4.13 | 3.12 |
| FPR2               | 3.52 | 4.14 | 3.15 |
| LOC100505851       | 3.51 | 4.40 | 3.06 |
| OTTHUMG00000020357 | 3.51 | 3.93 | 3.11 |
| OTTHUMG00000153054 | 3.51 | 3.85 | 3.26 |
| OR56A1             | 3.51 | 4.10 | 2.85 |
| ALPK2              | 3.51 | 3.94 | 3.04 |
| IDO1               | 3.51 | 4.08 | 3.05 |
| OTTHUMG00000164287 | 3.51 | 4.03 | 2.93 |
| IGFBP2             | 3.51 | 3.95 | 3.10 |
| OTTHUMG00000152947 | 3.51 | 3.88 | 3.18 |
| LOC100996249       | 3.51 | 4.19 | 3.02 |
| XRCC6P5            | 3.51 | 3.70 | 3.14 |
| GJA8               | 3.51 | 3.97 | 3.28 |
| SSX7               | 3.51 | 4.61 | 2.99 |
| LTF                | 3.51 | 4.34 | 3.05 |
| UGT2B7             | 3.51 | 3.98 | 2.96 |
| OTTHUMG00000154724 | 3.51 | 3.97 | 3.06 |
| OTTHUMG00000019429 | 3.51 | 3.87 | 3.07 |
| OTTHUMG00000161436 | 3.51 | 4.03 | 3.10 |
| OTTHUMG00000163319 | 3.51 | 4.01 | 3.34 |
| OTTHUMG00000151756 | 3.51 | 4.28 | 2.93 |
| MIR4755            | 3.51 | 3.91 | 3.13 |
| LOC100507175       | 3.51 | 3.76 | 3.05 |
| LOC440335          | 3.51 | 4.16 | 2.63 |
| ELOVL2             | 3.51 | 3.87 | 3.02 |
| ANKRD32            | 3.51 | 3.96 | 3.01 |
| OTTHUMG00000161395 | 3.51 | 4.35 | 2.83 |
| OTTHUMG00000153181 | 3.51 | 4.07 | 2.98 |
| DEFB104A           | 3.51 | 4.37 | 2.98 |
| PCAT4              | 3.51 | 4.15 | 2.91 |
| CATSPERD           | 3.51 | 4.05 | 3.05 |
| PRRG2              | 3.51 | 3.81 | 3.28 |
| OTTHUMG00000166089 | 3.51 | 4.08 | 3.13 |
| SNORD37            | 3.51 | 4.45 | 2.74 |
| INSL4              | 3.51 | 4.21 | 2.89 |
| CRYM-AS1           | 3.51 | 4.18 | 3.02 |
| SPATA17            | 3.51 | 3.79 | 3.21 |
| MDH1B              | 3.51 | 4.35 | 3.10 |
| OTTHUMG00000160129 | 3.51 | 3.86 | 2.99 |
| EVX1-AS            | 3.51 | 4.18 | 3.05 |
| OR2T35             | 3.51 | 4.00 | 2.95 |
| FCRL4              | 3.51 | 3.98 | 3.18 |
| OTTHUMG00000042097 | 3.51 | 3.84 | 3.18 |

|                    |      |      |      |
|--------------------|------|------|------|
| THSD7B             | 3.51 | 4.07 | 3.01 |
| OTTHUMG00000169041 | 3.51 | 4.44 | 2.52 |
| LINC00939          | 3.51 | 3.86 | 3.06 |
| OTTHUMG00000007952 | 3.51 | 4.01 | 3.13 |
| DUOXA2             | 3.51 | 4.17 | 2.86 |
| MAL2               | 3.51 | 4.12 | 2.84 |
| CALCB              | 3.51 | 4.20 | 3.02 |
| PSG8               | 3.51 | 4.25 | 2.64 |
| C4BPB              | 3.51 | 3.76 | 3.17 |
| OTTHUMG00000165323 | 3.51 | 3.92 | 3.16 |
| OTTHUMG00000171694 | 3.51 | 4.62 | 2.96 |
| IMMP2L-IT1         | 3.51 | 4.02 | 3.09 |
| OTTHUMG00000162318 | 3.51 | 3.93 | 2.92 |
| RPE                | 3.50 | 4.01 | 2.27 |
| LOC154092          | 3.50 | 3.92 | 3.08 |
| LOC100288198       | 3.50 | 3.87 | 3.16 |
| OTTHUMG00000164236 | 3.50 | 3.97 | 3.06 |
| LOC340515          | 3.50 | 3.95 | 3.14 |
| OTTHUMG00000170269 | 3.50 | 3.95 | 3.02 |
| CLEC1B             | 3.50 | 4.12 | 3.10 |
| TMEM71             | 3.50 | 3.93 | 2.90 |
| HDC                | 3.50 | 3.99 | 2.84 |
| HSD17B3            | 3.50 | 3.84 | 3.19 |
| PDX1-AS1           | 3.50 | 3.88 | 3.15 |
| PRR23C             | 3.50 | 4.46 | 2.61 |
| DSCR9              | 3.50 | 3.74 | 3.17 |
| COL6A5             | 3.50 | 3.94 | 3.14 |
| OTTHUMG00000162379 | 3.50 | 3.96 | 3.27 |
| EGR4               | 3.50 | 3.99 | 3.29 |
| LOC100505784       | 3.50 | 4.24 | 3.01 |
| CCDC63             | 3.50 | 3.96 | 2.90 |
| OTTHUMG00000067508 | 3.50 | 4.03 | 2.90 |
| LOC441025          | 3.50 | 3.81 | 2.99 |
| OTTHUMG00000040631 | 3.50 | 3.84 | 3.05 |
| PRSS3P3            | 3.50 | 4.31 | 2.99 |
| FEZF2              | 3.50 | 3.84 | 3.18 |
| SLC22A25           | 3.50 | 4.37 | 2.67 |
| C1QL2              | 3.50 | 4.24 | 3.05 |
| ST6GALNAC3         | 3.50 | 4.01 | 2.99 |
| KRTAP20-3          | 3.50 | 3.86 | 2.63 |
| OR1K1              | 3.50 | 4.01 | 3.13 |
| OTTHUMG00000171107 | 3.50 | 3.88 | 3.25 |
| TRBV5-4            | 3.50 | 4.56 | 2.16 |
| MTTP               | 3.50 | 3.96 | 3.21 |
| TAC1               | 3.50 | 3.97 | 3.21 |
| ESRP1              | 3.50 | 3.76 | 3.34 |
| MIR340             | 3.50 | 3.89 | 3.09 |
| DCAF4L1            | 3.50 | 4.04 | 2.77 |
| ASIC1              | 3.50 | 3.88 | 3.14 |

|                    |      |      |      |
|--------------------|------|------|------|
| OTTHUMG00000163017 | 3.50 | 4.33 | 2.85 |
| OTTHUMG00000181960 | 3.50 | 4.30 | 2.94 |
| SETD9              | 3.50 | 4.00 | 2.82 |
| NAA11              | 3.50 | 3.97 | 2.93 |
| OTTHUMG00000163525 | 3.50 | 3.96 | 3.04 |
| DSCAM              | 3.50 | 3.87 | 2.91 |
| TBC1D3P5           | 3.50 | 4.51 | 2.81 |
| OTTHUMG00000169139 | 3.50 | 3.80 | 3.25 |
| OTTHUMG00000132240 | 3.50 | 3.95 | 2.85 |
| OTTHUMG00000154038 | 3.50 | 4.13 | 3.06 |
| BAI3               | 3.50 | 4.22 | 3.00 |
| C3orf67            | 3.50 | 4.00 | 3.09 |
| OTTHUMG00000163997 | 3.49 | 3.73 | 3.32 |
| STAR               | 3.49 | 3.95 | 2.99 |
| FLJ46906           | 3.49 | 4.27 | 3.08 |
| RSPH10B            | 3.49 | 4.07 | 2.83 |
| OTTHUMG00000164272 | 3.49 | 3.86 | 3.17 |
| TMEM252            | 3.49 | 4.08 | 3.07 |
| CIB4               | 3.49 | 4.03 | 2.84 |
| ZNF77              | 3.49 | 3.96 | 3.06 |
| BHMT               | 3.49 | 3.88 | 3.24 |
| BRS3               | 3.49 | 4.42 | 3.17 |
| ACTR3C             | 3.49 | 4.03 | 2.82 |
| RP1                | 3.49 | 3.89 | 3.27 |
| CES4A              | 3.49 | 4.13 | 2.86 |
| LINC00882          | 3.49 | 4.05 | 3.24 |
| MAPK4              | 3.49 | 4.06 | 3.01 |
| NEK5               | 3.49 | 3.83 | 3.28 |
| RBM44              | 3.49 | 3.96 | 3.19 |
| TRMT10A            | 3.49 | 3.76 | 3.17 |
| CKMT1A             | 3.49 | 4.20 | 2.39 |
| UPP2               | 3.49 | 4.03 | 3.14 |
| OTTHUMG00000046152 | 3.49 | 4.18 | 2.77 |
| DNMT3L             | 3.49 | 3.90 | 3.16 |
| LINC00971          | 3.49 | 4.18 | 3.14 |
| CLCA2              | 3.49 | 3.71 | 3.21 |
| OTTHUMG00000156043 | 3.49 | 4.05 | 3.08 |
| ATRNL1             | 3.49 | 4.03 | 2.72 |
| OTTHUMG00000018868 | 3.49 | 4.07 | 3.06 |
| CEACAM21           | 3.49 | 3.79 | 2.75 |
| LOC100507311       | 3.49 | 3.98 | 2.92 |
| OTTHUMG00000161773 | 3.49 | 4.25 | 3.03 |
| USP27X             | 3.49 | 3.98 | 3.17 |
| ESP33              | 3.49 | 4.20 | 2.93 |
| OTTHUMG00000169719 | 3.49 | 4.30 | 3.01 |
| IFIT1B             | 3.49 | 4.22 | 2.57 |
| MAGI2-IT1          | 3.49 | 4.09 | 3.08 |
| CLDN24             | 3.49 | 3.91 | 2.91 |
| LOC158435          | 3.49 | 3.82 | 3.18 |



|                    |      |      |      |
|--------------------|------|------|------|
| LRRC38             | 3.49 | 3.91 | 2.85 |
| WT1-AS             | 3.49 | 3.97 | 3.05 |
| OTTHUMG00000159391 | 3.48 | 4.59 | 2.61 |
| ANXA10             | 3.48 | 3.92 | 2.90 |
| OTTHUMG00000002437 | 3.48 | 3.89 | 3.01 |
| BLM                | 3.48 | 3.74 | 3.17 |
| OTTHUMG00000151394 | 3.48 | 4.52 | 2.88 |
| HCRTR2             | 3.48 | 3.88 | 3.13 |
| HMX2               | 3.48 | 3.70 | 3.17 |
| LOC100996416       | 3.48 | 4.37 | 2.87 |
| CALML3-AS1         | 3.48 | 4.03 | 2.90 |
| SPATA42            | 3.48 | 4.04 | 3.03 |
| CPB1               | 3.48 | 3.96 | 3.06 |
| OTTHUMG00000183861 | 3.48 | 3.95 | 3.18 |
| FLJ42969           | 3.48 | 3.86 | 2.76 |
| GPR141             | 3.48 | 3.72 | 3.24 |
| LOC652993          | 3.48 | 3.93 | 3.07 |
| OTTHUMG00000024048 | 3.48 | 3.92 | 3.04 |
| OTTHUMG00000163224 | 3.48 | 3.93 | 3.06 |
| C1orf177           | 3.48 | 3.93 | 3.17 |
| MIR3937            | 3.48 | 4.36 | 2.86 |
| LOC100507194       | 3.48 | 4.20 | 2.64 |
| OTTHUMG00000169447 | 3.48 | 4.20 | 2.16 |
| PRSS51             | 3.48 | 3.98 | 3.02 |
| LOC100128573       | 3.48 | 3.95 | 3.14 |
| OTTHUMG00000034564 | 3.48 | 3.95 | 2.99 |
| LOC100128993       | 3.48 | 3.99 | 3.14 |
| XIRP2              | 3.48 | 3.84 | 3.16 |
| ACOT1              | 3.48 | 4.38 | 2.85 |
| LINC00652          | 3.48 | 3.89 | 3.14 |
| SV2C               | 3.48 | 3.87 | 3.03 |
| HS6ST2             | 3.48 | 3.99 | 2.98 |
| LINC00944          | 3.48 | 3.99 | 2.96 |
| GLYATL3            | 3.48 | 3.93 | 3.12 |
| PATE4              | 3.48 | 4.33 | 3.09 |
| CD1B               | 3.48 | 4.06 | 3.08 |
| OTTHUMG00000161215 | 3.48 | 4.00 | 2.78 |
| OTTHUMG00000163136 | 3.48 | 4.05 | 2.98 |
| TSGA10             | 3.48 | 3.74 | 3.07 |
| OTTHUMG00000020097 | 3.48 | 4.27 | 3.17 |
| OTTHUMG00000161670 | 3.48 | 3.78 | 2.94 |
| GPRC6A             | 3.48 | 3.71 | 3.26 |
| LOC100996654       | 3.48 | 3.71 | 3.18 |
| OTTHUMG00000167225 | 3.48 | 3.97 | 3.07 |
| TRDV1              | 3.48 | 3.79 | 3.16 |
| MIR527             | 3.48 | 4.24 | 3.00 |
| GPR82              | 3.48 | 4.03 | 3.23 |
| HEXA-AS1           | 3.48 | 4.09 | 2.99 |
| LOC440117          | 3.48 | 3.78 | 3.19 |

|                    |      |      |      |
|--------------------|------|------|------|
| ARMC4              | 3.48 | 4.00 | 3.24 |
| LATS2-AS1          | 3.48 | 4.46 | 2.69 |
| LINC00506          | 3.47 | 4.07 | 2.91 |
| OTTHUMG00000156487 | 3.47 | 4.28 | 2.72 |
| LOC148709          | 3.47 | 4.30 | 3.00 |
| NRG3               | 3.47 | 3.89 | 2.85 |
| RNA5SP455          | 3.47 | 4.21 | 2.42 |
| PROK2              | 3.47 | 3.91 | 3.28 |
| LOC100507506       | 3.47 | 3.93 | 3.00 |
| OTTHUMG00000151744 | 3.47 | 3.97 | 3.23 |
| LELP1              | 3.47 | 4.18 | 3.06 |
| LOC100130476       | 3.47 | 3.93 | 2.82 |
| TMED6              | 3.47 | 3.83 | 3.15 |
| VSX1               | 3.47 | 3.97 | 2.98 |
| C15orf26           | 3.47 | 3.95 | 2.90 |
| OTTHUMG00000164488 | 3.47 | 3.87 | 3.01 |
| TMEM169            | 3.47 | 3.95 | 3.07 |
| OLFM4              | 3.47 | 3.86 | 2.95 |
| MIR4713            | 3.47 | 4.29 | 2.47 |
| COL6A4P1           | 3.47 | 3.91 | 2.83 |
| VNN1               | 3.47 | 3.77 | 3.13 |
| TRIM51EP           | 3.47 | 4.06 | 2.78 |
| OTTHUMG00000155482 | 3.47 | 3.98 | 3.11 |
| LAMP5              | 3.47 | 3.97 | 3.12 |
| STPG2-AS1          | 3.47 | 3.84 | 3.07 |
| HES7               | 3.47 | 4.31 | 3.01 |
| MPZL3              | 3.47 | 3.88 | 2.98 |
| OTTHUMG00000020036 | 3.47 | 3.94 | 2.53 |
| NEUROG2            | 3.47 | 3.81 | 2.95 |
| PRKG1-AS1          | 3.47 | 4.38 | 2.81 |
| MIR550B1           | 3.47 | 5.00 | 2.82 |
| OTTHUMG00000165031 | 3.47 | 4.02 | 2.56 |
| LINC00269          | 3.47 | 4.16 | 3.16 |
| DNAJC5G            | 3.47 | 3.71 | 3.13 |
| PRSS21             | 3.47 | 3.83 | 3.16 |
| GCNT6              | 3.47 | 4.05 | 3.13 |
| CALN1              | 3.47 | 3.82 | 2.98 |
| CYP24A1            | 3.47 | 3.76 | 3.24 |
| MRGPRX4            | 3.47 | 4.00 | 3.01 |
| OTTHUMG00000164519 | 3.46 | 4.00 | 3.25 |
| GMNC               | 3.46 | 4.07 | 2.90 |
| OTTHUMG00000170253 | 3.46 | 4.12 | 2.99 |
| TSHB               | 3.46 | 3.82 | 2.75 |
| OTTHUMG00000160643 | 3.46 | 3.67 | 3.29 |
| KRTAP4-12          | 3.46 | 4.60 | 2.73 |
| OTTHUMG00000171848 | 3.46 | 3.91 | 3.16 |
| PLA2G3             | 3.46 | 3.79 | 3.21 |
| OTTHUMG00000020176 | 3.46 | 3.81 | 2.83 |
| SNAP91             | 3.46 | 3.78 | 3.06 |

|                    |      |      |      |
|--------------------|------|------|------|
| LOC100505887       | 3.46 | 4.19 | 3.14 |
| GPR61              | 3.46 | 3.90 | 3.09 |
| OTTHUMG00000168454 | 3.46 | 4.17 | 3.13 |
| LOC100507172       | 3.46 | 4.38 | 2.76 |
| OTTHUMG00000151447 | 3.46 | 3.84 | 3.03 |
| LOC645188          | 3.46 | 3.90 | 3.01 |
| NHLH2              | 3.46 | 3.82 | 3.17 |
| SLC30A10           | 3.46 | 4.08 | 3.16 |
| BDKRB1             | 3.46 | 3.78 | 3.28 |
| LINC00570          | 3.46 | 3.82 | 2.98 |
| MIR4277            | 3.46 | 3.98 | 2.94 |
| PPP1R1C            | 3.46 | 3.94 | 2.76 |
| MON1A              | 3.46 | 3.86 | 3.11 |
| OTTHUMG00000066033 | 3.46 | 3.90 | 2.98 |
| CAMK1G             | 3.46 | 4.04 | 2.86 |
| OTTHUMG00000015537 | 3.46 | 3.99 | 3.12 |
| LOC100130172       | 3.46 | 3.83 | 3.03 |
| PCGEM1             | 3.46 | 3.77 | 3.05 |
| WDR49              | 3.46 | 3.65 | 3.17 |
| RTP4               | 3.46 | 4.19 | 3.08 |
| OTTHUMG00000037823 | 3.46 | 3.84 | 3.24 |
| LOC100996455       | 3.46 | 3.91 | 2.91 |
| PAX6               | 3.46 | 3.99 | 3.09 |
| LOC100506161       | 3.46 | 3.83 | 2.91 |
| OR52A1             | 3.46 | 3.95 | 2.89 |
| MAR11              | 3.46 | 4.47 | 2.89 |
| IL13RA2            | 3.46 | 4.48 | 2.13 |
| ZIC3               | 3.46 | 3.77 | 2.95 |
| LOC100507109       | 3.46 | 4.26 | 2.92 |
| OTTHUMG00000016054 | 3.46 | 3.86 | 3.02 |
| TAS2R10            | 3.46 | 4.12 | 3.04 |
| C20orf187          | 3.46 | 4.23 | 3.03 |
| LOC641367          | 3.46 | 4.17 | 2.78 |
| SAMSN1             | 3.46 | 3.83 | 3.22 |
| LINC00308          | 3.46 | 3.90 | 2.90 |
| ZNF285             | 3.46 | 4.05 | 3.04 |
| LOC441167          | 3.46 | 3.76 | 3.11 |
| OTTHUMG00000019692 | 3.46 | 3.84 | 3.10 |
| LOC440518          | 3.46 | 3.87 | 2.96 |
| LOC100288619       | 3.45 | 3.95 | 3.13 |
| KAAG1              | 3.45 | 3.95 | 2.79 |
| CDCA7              | 3.45 | 4.02 | 3.15 |
| BTLA               | 3.45 | 3.98 | 3.05 |
| IRF4               | 3.45 | 3.77 | 3.14 |
| AKAP3              | 3.45 | 3.83 | 2.89 |
| OTTHUMG00000164977 | 3.45 | 3.75 | 2.59 |
| OTTHUMG00000157216 | 3.45 | 3.89 | 2.96 |
| REG3A              | 3.45 | 4.24 | 3.05 |
| CXCL10             | 3.45 | 4.11 | 2.84 |

|                    |      |      |      |
|--------------------|------|------|------|
| CSN1S2BP           | 3.45 | 3.97 | 3.01 |
| LPO                | 3.45 | 3.76 | 3.06 |
| LOC100506497       | 3.45 | 3.88 | 3.03 |
| C12orf74           | 3.45 | 3.98 | 3.02 |
| TAS2R60            | 3.45 | 3.84 | 3.06 |
| APCS               | 3.45 | 4.08 | 2.97 |
| OR10A2             | 3.45 | 4.10 | 2.93 |
| LOC100130301       | 3.45 | 4.12 | 3.06 |
| OTTHUMG00000169048 | 3.45 | 3.89 | 3.06 |
| OTTHUMG00000171950 | 3.45 | 4.10 | 2.93 |
| RRAD               | 3.45 | 3.92 | 3.09 |
| PSG9               | 3.45 | 3.91 | 2.58 |
| OTTHUMG00000162669 | 3.45 | 4.08 | 2.83 |
| C8A                | 3.45 | 3.90 | 2.73 |
| LINC00659          | 3.45 | 3.70 | 3.14 |
| TSSK1B             | 3.45 | 4.02 | 2.89 |
| GH1                | 3.45 | 4.05 | 2.54 |
| OTTHUMG00000166086 | 3.45 | 3.74 | 3.06 |
| LINC00567          | 3.45 | 3.87 | 3.09 |
| LOC100506944       | 3.45 | 4.10 | 2.83 |
| OTTHUMG00000164397 | 3.45 | 3.82 | 3.00 |
| OR5AS1             | 3.45 | 4.32 | 3.18 |
| BHLHE40-AS1        | 3.45 | 3.76 | 3.09 |
| LOC389033          | 3.45 | 4.54 | 2.47 |
| ONECUT1            | 3.45 | 3.73 | 3.26 |
| OTTHUMG00000166475 | 3.45 | 3.73 | 3.00 |
| GYS2               | 3.45 | 3.64 | 3.06 |
| GDPD2              | 3.44 | 3.72 | 3.12 |
| KLLN               | 3.44 | 3.89 | 3.09 |
| OTTHUMG00000013154 | 3.44 | 3.77 | 3.03 |
| MIR615             | 3.44 | 3.81 | 3.11 |
| EFTUD1P1           | 3.44 | 4.11 | 2.84 |
| LOC151475          | 3.44 | 3.88 | 3.15 |
| OTTHUMG00000150310 | 3.44 | 3.96 | 3.08 |
| C20orf78           | 3.44 | 3.70 | 3.21 |
| BVES-AS1           | 3.44 | 4.11 | 2.86 |
| MIR1179            | 3.44 | 4.57 | 2.81 |
| RNA5SP167          | 3.44 | 4.28 | 2.25 |
| OTTHUMG00000163264 | 3.44 | 4.02 | 2.83 |
| OTTHUMG00000152414 | 3.44 | 4.00 | 3.09 |
| CHRM2              | 3.44 | 3.74 | 3.16 |
| LINC00161          | 3.44 | 4.15 | 3.04 |
| OTTHUMG00000152839 | 3.44 | 3.94 | 2.76 |
| MIR4303            | 3.44 | 3.71 | 3.18 |
| CLDN10             | 3.44 | 3.78 | 3.10 |
| OTTHUMG00000170726 | 3.44 | 4.06 | 2.86 |
| C3orf55            | 3.44 | 3.94 | 3.06 |
| RLN1               | 3.44 | 4.33 | 2.71 |
| HTR2A-AS1          | 3.44 | 4.05 | 3.19 |

|                    |      |      |      |
|--------------------|------|------|------|
| OTTHUMG00000162997 | 3.44 | 3.74 | 3.12 |
| OTTHUMG00000167434 | 3.44 | 3.92 | 3.05 |
| ABP1               | 3.44 | 3.90 | 2.91 |
| MIR516B1           | 3.44 | 4.18 | 2.96 |
| OR1F1              | 3.44 | 4.23 | 2.52 |
| LINC00691          | 3.44 | 3.82 | 3.07 |
| LEKR1              | 3.44 | 3.73 | 3.20 |
| LOC100506157       | 3.44 | 3.83 | 3.09 |
| OTTHUMG00000171401 | 3.44 | 4.12 | 2.85 |
| OTTHUMG00000014288 | 3.44 | 4.02 | 2.82 |
| SNORD114-29        | 3.44 | 5.43 | 2.00 |
| TPI1P2             | 3.44 | 4.14 | 2.87 |
| PPP1R2P9           | 3.44 | 3.81 | 3.00 |
| OTTHUMG00000172167 | 3.44 | 3.76 | 3.16 |
| MCF2L2             | 3.44 | 3.64 | 3.28 |
| MIR4633            | 3.43 | 3.99 | 2.91 |
| OTTHUMG00000150931 | 3.43 | 3.97 | 3.05 |
| OTTHUMG00000170065 | 3.43 | 4.50 | 2.90 |
| P2RX6P             | 3.43 | 4.07 | 2.74 |
| OTTHUMG00000034422 | 3.43 | 3.86 | 2.70 |
| RPH3A              | 3.43 | 3.77 | 3.06 |
| OTTHUMG00000180563 | 3.43 | 3.88 | 2.61 |
| OTTHUMG00000020283 | 3.43 | 3.61 | 3.07 |
| FGF20              | 3.43 | 3.99 | 3.05 |
| ANKRD60            | 3.43 | 4.10 | 2.95 |
| FKBP9L             | 3.43 | 4.09 | 3.12 |
| MIR4773-1          | 3.43 | 4.15 | 2.84 |
| CNGA4              | 3.43 | 3.72 | 3.23 |
| LOC284801          | 3.43 | 3.82 | 2.90 |
| CAMTA1-IT1         | 3.43 | 4.16 | 2.54 |
| IGDCC4             | 3.43 | 3.77 | 3.17 |
| PURG               | 3.43 | 3.80 | 3.02 |
| FREM2              | 3.43 | 4.04 | 2.70 |
| SALL3              | 3.43 | 3.97 | 3.03 |
| C11orf85           | 3.43 | 3.77 | 2.96 |
| TYR                | 3.43 | 3.78 | 2.93 |
| ARIH2OS            | 3.43 | 3.83 | 2.93 |
| OTTHUMG00000162703 | 3.43 | 3.94 | 2.98 |
| LINC00502          | 3.43 | 3.79 | 3.12 |
| KCNE2              | 3.43 | 3.82 | 3.19 |
| PIP5K1P1           | 3.43 | 4.09 | 3.09 |
| OTTHUMG00000159264 | 3.43 | 4.15 | 2.53 |
| OTTHUMG00000156033 | 3.43 | 3.80 | 2.87 |
| OTTHUMG00000166430 | 3.43 | 3.89 | 2.87 |
| OTTHUMG00000166129 | 3.43 | 3.90 | 3.04 |
| TRBV10-2           | 3.43 | 4.34 | 2.22 |
| MIR4717            | 3.43 | 3.95 | 2.80 |
| ILDR2              | 3.43 | 3.70 | 3.06 |
| RNA5SP367          | 3.43 | 4.01 | 2.85 |

|                           |      |      |      |
|---------------------------|------|------|------|
| <i>C5orf47</i>            | 3.43 | 4.04 | 2.94 |
| <i>HHLA1</i>              | 3.43 | 3.82 | 3.15 |
| <i>SLC30A8</i>            | 3.43 | 3.64 | 3.21 |
| <i>OTTHUMG00000163601</i> | 3.43 | 4.03 | 3.03 |
| <i>ARHGEF7-AS1</i>        | 3.43 | 4.13 | 3.02 |
| <i>KRT40</i>              | 3.43 | 3.81 | 3.06 |
| <i>RNA5SP61</i>           | 3.43 | 4.15 | 2.65 |
| <i>OTTHUMG00000021152</i> | 3.43 | 4.52 | 2.94 |
| <i>CXCR5</i>              | 3.43 | 3.99 | 3.07 |
| <i>NRSN1</i>              | 3.43 | 4.22 | 3.17 |
| <i>OPRM1</i>              | 3.42 | 3.78 | 3.12 |
| <i>MIR3184</i>            | 3.42 | 4.05 | 2.77 |
| <i>LINC00469</i>          | 3.42 | 3.78 | 2.94 |
| <i>OTTHUMG00000162000</i> | 3.42 | 3.96 | 2.60 |
| <i>TOMM20L</i>            | 3.42 | 3.90 | 3.11 |
| <i>TM4SF1-AS1</i>         | 3.42 | 3.85 | 2.91 |
| <i>OTTHUMG00000165349</i> | 3.42 | 3.90 | 2.99 |
| <i>HMG2P46</i>            | 3.42 | 3.75 | 3.13 |
| <i>LINC00708</i>          | 3.42 | 3.87 | 3.08 |
| <i>MIR592</i>             | 3.42 | 3.91 | 2.90 |
| <i>LINC00942</i>          | 3.42 | 3.84 | 2.85 |
| <i>MURC</i>               | 3.42 | 3.80 | 3.05 |
| <i>OR4K13</i>             | 3.42 | 4.74 | 2.88 |
| <i>ARL13A</i>             | 3.42 | 3.74 | 3.18 |
| <i>KIF2C</i>              | 3.42 | 3.88 | 3.07 |
| <i>TPI1P3</i>             | 3.42 | 4.22 | 2.50 |
| <i>OTTHUMG00000161032</i> | 3.42 | 3.96 | 2.58 |
| <i>AGBL5-IT1</i>          | 3.42 | 4.20 | 2.62 |
| <i>OTTHUMG00000152269</i> | 3.42 | 3.94 | 2.88 |
| <i>TAS2R40</i>            | 3.42 | 4.18 | 2.79 |
| <i>RNA5SP416</i>          | 3.42 | 4.33 | 2.82 |
| <i>ADAMTS20</i>           | 3.42 | 4.10 | 3.13 |
| <i>OTTHUMG00000041461</i> | 3.42 | 3.93 | 2.88 |
| <i>KRT23</i>              | 3.42 | 3.68 | 3.12 |
| <i>EPHA1-AS1</i>          | 3.42 | 3.63 | 2.99 |
| <i>MAGEA11</i>            | 3.42 | 3.72 | 3.13 |
| <i>RNA5SP442</i>          | 3.42 | 4.31 | 1.99 |
| <i>OTTHUMG00000168648</i> | 3.42 | 3.93 | 3.01 |
| <i>LOC340508</i>          | 3.42 | 3.94 | 3.02 |
| <i>CPXCR1</i>             | 3.42 | 4.04 | 2.73 |
| <i>OTTHUMG00000171475</i> | 3.42 | 3.89 | 2.92 |
| <i>OTTHUMG00000160052</i> | 3.42 | 3.90 | 3.05 |
| <i>OTTHUMG00000155024</i> | 3.42 | 4.02 | 3.20 |
| <i>OTTHUMG00000173195</i> | 3.42 | 4.10 | 2.70 |
| <i>TNR-IT1</i>            | 3.42 | 3.88 | 3.07 |
| <i>RPP40</i>              | 3.42 | 3.82 | 3.12 |
| <i>LOC728671</i>          | 3.42 | 3.68 | 3.12 |
| <i>CYP3A4</i>             | 3.42 | 3.75 | 2.96 |
| <i>OTTHUMG00000156009</i> | 3.42 | 3.68 | 3.16 |

|                    |      |      |      |
|--------------------|------|------|------|
| KCNJ16             | 3.42 | 3.81 | 3.19 |
| OTTHUMG00000164235 | 3.42 | 3.65 | 3.07 |
| OTTHUMG00000060108 | 3.42 | 3.82 | 3.07 |
| OTTHUMG00000014150 | 3.42 | 4.31 | 3.04 |
| ASCL3              | 3.42 | 3.92 | 3.11 |
| TDGF1P3            | 3.42 | 3.81 | 3.13 |
| GPR63              | 3.42 | 4.07 | 2.71 |
| KRT80              | 3.42 | 4.18 | 3.20 |
| RESP18             | 3.42 | 3.78 | 3.04 |
| KMO                | 3.42 | 3.81 | 2.89 |
| VCX3B              | 3.42 | 4.19 | 2.84 |
| DNAH14             | 3.42 | 4.00 | 3.09 |
| SLC8A1             | 3.42 | 4.25 | 3.06 |
| CNTN4              | 3.42 | 3.69 | 3.13 |
| OTTHUMG00000156608 | 3.42 | 3.84 | 3.01 |
| WEE2-AS1           | 3.42 | 3.88 | 3.08 |
| FOXB1              | 3.41 | 3.75 | 2.82 |
| SLC34A2            | 3.41 | 3.67 | 3.02 |
| RASEF              | 3.41 | 3.99 | 2.94 |
| STK4-AS1           | 3.41 | 3.93 | 3.16 |
| PAPL               | 3.41 | 3.64 | 3.00 |
| OTOL1              | 3.41 | 3.75 | 3.04 |
| DKK4               | 3.41 | 3.82 | 2.98 |
| TC2N               | 3.41 | 4.19 | 3.07 |
| LINC00303          | 3.41 | 4.05 | 2.90 |
| TMEM72-AS1         | 3.41 | 3.75 | 2.65 |
| MAGEE2             | 3.41 | 3.65 | 3.13 |
| LOC440895          | 3.41 | 4.33 | 2.51 |
| OTTHUMG00000166913 | 3.41 | 4.77 | 2.58 |
| MIR3913-1          | 3.41 | 3.94 | 2.67 |
| LOC100996339       | 3.41 | 3.83 | 2.88 |
| IRAK1BP1           | 3.41 | 3.69 | 3.20 |
| PHEX               | 3.41 | 4.05 | 2.72 |
| RIMS2              | 3.41 | 3.95 | 2.93 |
| LOC100505811       | 3.41 | 4.06 | 2.82 |
| CXCL13             | 3.41 | 3.91 | 2.92 |
| SFTPA1             | 3.41 | 3.84 | 3.18 |
| DCAF12L2           | 3.41 | 3.99 | 2.91 |
| CSAG4              | 3.41 | 4.02 | 2.45 |
| LOC100996355       | 3.41 | 3.87 | 3.20 |
| CYSLTR2            | 3.41 | 3.91 | 2.99 |
| LOC388499          | 3.41 | 3.93 | 2.63 |
| TMEM51             | 3.41 | 4.11 | 2.93 |
| OTTHUMG00000158500 | 3.41 | 4.25 | 2.30 |
| OTTHUMG00000021599 | 3.41 | 3.79 | 2.90 |
| PROB1              | 3.41 | 3.74 | 3.06 |
| GUCY2F             | 3.41 | 4.02 | 3.00 |
| LINC00309          | 3.41 | 3.84 | 2.86 |
| AKAP14             | 3.41 | 3.99 | 3.07 |

|                    |      |      |      |
|--------------------|------|------|------|
| LOC644961          | 3.41 | 3.73 | 3.16 |
| FAM92A1P2          | 3.41 | 3.73 | 3.20 |
| OTTHUMG00000153047 | 3.41 | 3.96 | 2.97 |
| OR10X1             | 3.41 | 3.80 | 2.88 |
| LOC440704          | 3.41 | 4.12 | 2.95 |
| SMYD1              | 3.41 | 4.07 | 2.88 |
| DIO1               | 3.41 | 3.63 | 2.98 |
| MESTIT1            | 3.41 | 3.95 | 3.13 |
| IRG1               | 3.40 | 3.73 | 2.87 |
| OTTHUMG00000032807 | 3.40 | 4.10 | 2.77 |
| GRIK1-AS2          | 3.40 | 3.72 | 3.03 |
| KLRC4-KLRK1        | 3.40 | 4.35 | 2.67 |
| WFDC9              | 3.40 | 4.01 | 3.14 |
| TCERG1L            | 3.40 | 3.72 | 2.76 |
| FAM83D             | 3.40 | 4.05 | 2.77 |
| ANKRD18DP          | 3.40 | 3.98 | 2.76 |
| CCR5               | 3.40 | 3.72 | 3.17 |
| GZMB               | 3.40 | 4.05 | 3.01 |
| OTTHUMG00000020547 | 3.40 | 3.92 | 3.06 |
| MIR875             | 3.40 | 4.18 | 2.93 |
| ESX1               | 3.40 | 3.64 | 3.29 |
| KCNJ1              | 3.40 | 4.28 | 3.11 |
| LINC00589          | 3.40 | 3.93 | 2.97 |
| CELF2-AS2          | 3.40 | 4.02 | 2.68 |
| COQ3               | 3.40 | 4.04 | 2.65 |
| GAD1               | 3.40 | 3.89 | 3.05 |
| MAPK8IP1           | 3.40 | 4.15 | 2.79 |
| CHRM3-AS2          | 3.40 | 3.90 | 2.91 |
| OTTHUMG00000171351 | 3.40 | 4.14 | 2.90 |
| IL20               | 3.40 | 3.97 | 2.87 |
| FLJ45974           | 3.40 | 3.58 | 3.08 |
| OTTHUMG00000163846 | 3.40 | 4.18 | 2.62 |
| OTTHUMG00000016839 | 3.40 | 4.07 | 2.72 |
| FAM45B             | 3.40 | 3.69 | 3.15 |
| ATP13A4-AS1        | 3.40 | 4.19 | 2.76 |
| OTTHUMG00000033267 | 3.40 | 3.93 | 2.99 |
| USP17L10           | 3.40 | 3.94 | 2.65 |
| OTTHUMG00000015954 | 3.40 | 5.22 | 2.34 |
| PP2672             | 3.40 | 4.39 | 2.72 |
| OTTHUMG00000035812 | 3.40 | 3.74 | 3.00 |
| THEG               | 3.40 | 3.78 | 3.00 |
| OTTHUMG00000173008 | 3.40 | 4.03 | 2.59 |
| RNA5SP409          | 3.40 | 4.04 | 2.56 |
| MGC2848            | 3.40 | 3.88 | 2.94 |
| LOC730179          | 3.40 | 3.76 | 3.02 |
| TPD52L3            | 3.40 | 3.76 | 3.07 |
| OTTHUMG00000154833 | 3.40 | 3.57 | 3.07 |
| LRRC53             | 3.40 | 3.91 | 3.13 |
| FLJ42200           | 3.40 | 3.75 | 2.82 |



|                    |      |      |      |
|--------------------|------|------|------|
| CPHL1P             | 3.40 | 3.79 | 2.79 |
| SP8                | 3.40 | 3.99 | 2.98 |
| OTTHUMG00000169138 | 3.40 | 4.13 | 3.14 |
| ZNF221             | 3.40 | 4.27 | 2.74 |
| REG1B              | 3.40 | 3.67 | 3.17 |
| MIR4319            | 3.40 | 3.79 | 2.62 |
| OTTHUMG00000018052 | 3.40 | 3.84 | 3.00 |
| C1orf210           | 3.40 | 3.98 | 3.14 |
| SLC35G6            | 3.40 | 3.95 | 2.54 |
| LOC643623          | 3.40 | 3.84 | 2.81 |
| PRR19              | 3.39 | 3.69 | 3.15 |
| OR2A25             | 3.39 | 4.08 | 2.13 |
| FAM27B             | 3.39 | 4.03 | 2.95 |
| LINC00391          | 3.39 | 3.74 | 2.88 |
| LOC284648          | 3.39 | 3.82 | 2.87 |
| OTTHUMG00000032716 | 3.39 | 4.18 | 2.91 |
| DSCR8              | 3.39 | 3.71 | 3.02 |
| GRM7-AS1           | 3.39 | 3.99 | 2.94 |
| ATP12A             | 3.39 | 3.87 | 3.02 |
| RNU6-74            | 3.39 | 4.61 | 1.74 |
| OTTHUMG00000019052 | 3.39 | 4.11 | 2.91 |
| LINC00457          | 3.39 | 3.90 | 3.17 |
| OTTHUMG00000161887 | 3.39 | 3.67 | 3.05 |
| EYA3-IT1           | 3.39 | 4.08 | 2.95 |
| MIR3200            | 3.39 | 3.74 | 2.83 |
| OTTHUMG00000040633 | 3.39 | 4.13 | 2.84 |
| WDR72              | 3.39 | 3.78 | 2.98 |
| KCNH7              | 3.39 | 3.75 | 2.98 |
| EFCAB12            | 3.39 | 3.73 | 2.80 |
| LALBA              | 3.39 | 4.35 | 3.05 |
| TRIM50             | 3.39 | 4.20 | 2.73 |
| LOC100131635       | 3.39 | 3.99 | 2.92 |
| C10orf90           | 3.39 | 3.75 | 3.17 |
| GIF                | 3.39 | 3.71 | 3.02 |
| LINC00226          | 3.39 | 3.92 | 3.03 |
| KRTAP9-3           | 3.39 | 3.90 | 3.01 |
| PARD3-AS1          | 3.39 | 4.26 | 2.87 |
| OTTHUMG00000152416 | 3.39 | 4.15 | 3.04 |
| LINC00955          | 3.39 | 3.72 | 3.00 |
| LINC00642          | 3.39 | 3.79 | 3.06 |
| IGSF1              | 3.39 | 3.59 | 3.17 |
| CAPN14             | 3.39 | 3.88 | 2.83 |
| PPP1R27            | 3.39 | 3.74 | 2.91 |
| OTTHUMG00000157218 | 3.39 | 3.78 | 2.80 |
| OTTHUMG00000018941 | 3.39 | 4.04 | 2.94 |
| CEACAM5            | 3.39 | 4.11 | 2.60 |
| ITGB6              | 3.39 | 3.75 | 2.89 |
| LOC100505718       | 3.39 | 3.78 | 3.00 |
| TFF2               | 3.39 | 3.93 | 3.00 |

|                    |      |      |      |
|--------------------|------|------|------|
| TCP11              | 3.39 | 4.06 | 2.89 |
| OR14A16            | 3.39 | 3.94 | 2.99 |
| KRTAP19-5          | 3.38 | 3.76 | 2.94 |
| OR2D2              | 3.38 | 3.66 | 3.11 |
| OTTHUMG00000172076 | 3.38 | 4.02 | 3.04 |
| FLJ22763           | 3.38 | 3.65 | 2.99 |
| OTTHUMG00000161726 | 3.38 | 3.61 | 3.13 |
| OR51L1             | 3.38 | 4.15 | 2.93 |
| OLIG2              | 3.38 | 3.64 | 3.16 |
| LOC145845          | 3.38 | 3.94 | 3.06 |
| LINC00927          | 3.38 | 3.76 | 3.12 |
| DEFB121            | 3.38 | 3.92 | 2.79 |
| OTTHUMG00000168485 | 3.38 | 4.07 | 3.14 |
| UPK1B              | 3.38 | 4.01 | 2.95 |
| OTTHUMG00000170886 | 3.38 | 3.78 | 2.99 |
| LOC646778          | 3.38 | 3.74 | 2.95 |
| GPR15              | 3.38 | 3.61 | 3.16 |
| OTTHUMG00000164139 | 3.38 | 3.69 | 2.88 |
| OTTHUMG00000172034 | 3.38 | 4.15 | 2.86 |
| OTTHUMG00000161635 | 3.38 | 3.87 | 3.04 |
| PA2G4P4            | 3.38 | 4.03 | 3.04 |
| KRTAP1-4           | 3.38 | 3.81 | 2.87 |
| OTTHUMG00000151723 | 3.38 | 3.65 | 3.12 |
| OTTHUMG00000153160 | 3.38 | 3.82 | 2.90 |
| CDKL3              | 3.38 | 3.65 | 3.10 |
| LOC400794          | 3.38 | 3.70 | 3.09 |
| DPY19L2P4          | 3.38 | 3.70 | 3.09 |
| OTTHUMG00000164595 | 3.38 | 3.79 | 2.95 |
| CYP2C8             | 3.38 | 4.31 | 2.83 |
| SSX6               | 3.38 | 3.96 | 2.74 |
| SNTG1              | 3.38 | 3.83 | 3.03 |
| LOC257152          | 3.38 | 3.80 | 2.96 |
| AGR2               | 3.38 | 4.00 | 2.74 |
| TSACC              | 3.38 | 3.83 | 3.04 |
| NTSR2              | 3.38 | 3.91 | 3.03 |
| LOC728114          | 3.38 | 4.01 | 2.82 |
| MIR605             | 3.38 | 4.29 | 2.80 |
| CASC1              | 3.38 | 3.85 | 3.04 |
| OTTHUMG00000140394 | 3.38 | 4.31 | 2.80 |
| LINC00616          | 3.38 | 4.35 | 2.82 |
| FLG2               | 3.38 | 4.06 | 2.96 |
| SGCZ               | 3.38 | 3.88 | 3.03 |
| NREP-AS1           | 3.38 | 3.75 | 2.93 |
| GUCY2C             | 3.38 | 3.60 | 2.92 |
| FBP2               | 3.38 | 3.73 | 2.95 |
| SLC25A51P1         | 3.38 | 3.77 | 3.00 |
| SLC9A9-AS2         | 3.38 | 3.68 | 2.95 |
| OTTHUMG00000015884 | 3.38 | 3.73 | 2.84 |
| ZNF449             | 3.38 | 4.03 | 2.83 |

|                    |      |      |      |
|--------------------|------|------|------|
| CDCA2              | 3.38 | 3.99 | 2.87 |
| C15orf32           | 3.38 | 4.14 | 3.20 |
| SNORD32B           | 3.38 | 4.02 | 2.75 |
| DUSP21             | 3.38 | 3.61 | 3.11 |
| MIR29B2            | 3.38 | 4.50 | 2.47 |
| OTTHUMG00000165530 | 3.38 | 3.84 | 2.88 |
| OTTHUMG00000067215 | 3.37 | 4.01 | 3.06 |
| AOAH-IT1           | 3.37 | 4.02 | 2.65 |
| OTTHUMG00000010108 | 3.37 | 3.75 | 2.88 |
| NBPF4              | 3.37 | 4.12 | 3.02 |
| ALDH1L1-AS2        | 3.37 | 3.74 | 3.02 |
| IL1B               | 3.37 | 3.74 | 3.09 |
| GEMIN8P4           | 3.37 | 3.81 | 2.94 |
| OTTHUMG00000034550 | 3.37 | 4.03 | 3.02 |
| C9orf40            | 3.37 | 3.68 | 2.97 |
| OTTHUMG00000161193 | 3.37 | 3.85 | 3.04 |
| IL15               | 3.37 | 3.94 | 3.02 |
| CPA3               | 3.37 | 4.11 | 2.63 |
| LINC00365          | 3.37 | 3.68 | 2.84 |
| OTTHUMG00000155428 | 3.37 | 3.82 | 2.98 |
| DPYSL5             | 3.37 | 3.56 | 3.11 |
| LOC646498          | 3.37 | 3.84 | 2.76 |
| HFM1               | 3.37 | 3.77 | 3.05 |
| OTTHUMG00000171586 | 3.37 | 3.91 | 3.07 |
| OR51A2             | 3.37 | 4.16 | 2.71 |
| OTTHUMG00000168815 | 3.37 | 3.86 | 2.61 |
| UBE2DNL            | 3.37 | 3.71 | 3.05 |
| PAH                | 3.37 | 3.65 | 3.00 |
| OTTHUMG00000165258 | 3.37 | 3.69 | 3.10 |
| MYOD1              | 3.37 | 3.85 | 3.01 |
| TXK                | 3.37 | 3.98 | 3.06 |
| ETV5-AS1           | 3.37 | 3.84 | 2.73 |
| VWC2L              | 3.37 | 3.68 | 3.02 |
| LOC100506226       | 3.37 | 3.61 | 3.05 |
| C12orf63           | 3.37 | 3.75 | 3.10 |
| TDGF1              | 3.37 | 4.44 | 2.80 |
| OR10J5             | 3.37 | 3.83 | 3.02 |
| OTTHUMG00000066362 | 3.37 | 3.65 | 3.02 |
| KRTAP4-3           | 3.37 | 3.77 | 2.92 |
| OTTHUMG00000162208 | 3.37 | 3.85 | 3.03 |
| OR4S2              | 3.37 | 4.14 | 2.49 |
| ADAM7              | 3.37 | 3.60 | 3.15 |
| ENAM               | 3.37 | 3.90 | 3.02 |
| NRG3-AS1           | 3.37 | 3.88 | 3.03 |
| CDK1               | 3.37 | 3.92 | 2.78 |
| NT5M               | 3.37 | 3.74 | 3.11 |
| OTTHUMG00000170678 | 3.37 | 4.11 | 2.83 |
| LOC100506891       | 3.37 | 3.81 | 2.88 |
| LOC100130156       | 3.36 | 3.89 | 2.84 |

|                    |      |      |      |
|--------------------|------|------|------|
| OTTHUMG00000154962 | 3.36 | 3.77 | 2.77 |
| AKR1B10            | 3.36 | 4.01 | 2.55 |
| TNP2               | 3.36 | 4.04 | 2.98 |
| ANP32D             | 3.36 | 4.09 | 2.90 |
| OTTHUMG00000166467 | 3.36 | 3.54 | 3.03 |
| LOC642366          | 3.36 | 3.71 | 2.97 |
| LIN28B             | 3.36 | 3.84 | 2.80 |
| ZNF80              | 3.36 | 3.78 | 3.07 |
| HIST1H2AK          | 3.36 | 3.86 | 2.01 |
| DKK2               | 3.36 | 3.75 | 2.98 |
| CCL7               | 3.36 | 4.11 | 2.61 |
| OR14K1             | 3.36 | 3.66 | 2.74 |
| TMED10P1           | 3.36 | 4.01 | 2.85 |
| TRPV6              | 3.36 | 3.75 | 3.04 |
| BPY2               | 3.36 | 3.79 | 3.10 |
| KRTAP10-8          | 3.36 | 3.79 | 2.98 |
| OTTHUMG00000037985 | 3.36 | 3.99 | 2.87 |
| MACROD2            | 3.36 | 3.54 | 3.16 |
| OTTHUMG00000163215 | 3.36 | 3.81 | 2.93 |
| SEC24B-AS1         | 3.36 | 3.71 | 3.02 |
| OTTHUMG00000183865 | 3.36 | 3.61 | 2.99 |
| FLJ39080           | 3.36 | 3.66 | 2.95 |
| LOC100132735       | 3.36 | 3.99 | 2.84 |
| IL17A              | 3.36 | 3.60 | 3.05 |
| MIR9-3             | 3.36 | 3.99 | 2.82 |
| OTTHUMG00000015885 | 3.36 | 3.68 | 3.10 |
| OTTHUMG00000017241 | 3.36 | 3.73 | 3.02 |
| OTTHUMG00000160529 | 3.36 | 3.92 | 2.67 |
| GDF5               | 3.36 | 4.05 | 2.63 |
| A4GNT              | 3.36 | 3.88 | 3.01 |
| OTTHUMG00000032676 | 3.36 | 4.13 | 2.92 |
| INSL6              | 3.36 | 4.01 | 3.05 |
| RHOH               | 3.36 | 3.73 | 3.03 |
| LOC440416          | 3.36 | 3.59 | 3.15 |
| OTTHUMG00000155426 | 3.36 | 4.03 | 2.90 |
| PCDP1              | 3.36 | 3.83 | 3.10 |
| OTTHUMG00000161600 | 3.36 | 3.85 | 2.97 |
| ATCAY              | 3.36 | 3.69 | 2.98 |
| SPANXD             | 3.36 | 4.16 | 2.52 |
| OTTHUMG00000157252 | 3.36 | 3.96 | 2.97 |
| AGTR2              | 3.36 | 3.63 | 3.01 |
| LOC494127          | 3.36 | 4.05 | 2.79 |
| LOC253044          | 3.36 | 3.78 | 3.13 |
| MIR1298            | 3.36 | 4.57 | 2.74 |
| OTTHUMG00000162955 | 3.36 | 3.96 | 2.97 |
| OR51B6             | 3.36 | 3.94 | 2.80 |
| OTTHUMG00000151461 | 3.36 | 3.79 | 2.95 |
| RNA5SP228          | 3.36 | 4.00 | 2.37 |
| LPA                | 3.36 | 3.86 | 2.82 |

|                    |      |      |      |
|--------------------|------|------|------|
| OTTHUMG00000166145 | 3.36 | 3.73 | 3.14 |
| PANK1              | 3.36 | 3.74 | 2.86 |
| OR52N4             | 3.36 | 3.83 | 3.00 |
| LOC151121          | 3.36 | 4.24 | 2.84 |
| PKIB               | 3.36 | 3.64 | 3.02 |
| OTTHUMG00000168478 | 3.35 | 3.88 | 3.03 |
| MIR103A1           | 3.35 | 3.98 | 2.56 |
| OTTHUMG00000168449 | 3.35 | 3.90 | 2.89 |
| CTLA4              | 3.35 | 3.64 | 3.15 |
| OTTHUMG00000002525 | 3.35 | 4.44 | 2.97 |
| OTTHUMG00000170887 | 3.35 | 3.61 | 2.92 |
| LINC00918          | 3.35 | 4.26 | 2.50 |
| LOC100130256       | 3.35 | 3.86 | 2.90 |
| PRHOXNB            | 3.35 | 3.61 | 2.99 |
| FAM3B              | 3.35 | 3.72 | 3.00 |
| FAM150A            | 3.35 | 3.98 | 2.99 |
| OTTHUMG00000037350 | 3.35 | 4.05 | 3.11 |
| OTTHUMG00000161390 | 3.35 | 3.83 | 2.75 |
| MIR892A            | 3.35 | 4.90 | 2.21 |
| WNT2               | 3.35 | 3.57 | 2.93 |
| TMPRSS11E          | 3.35 | 3.56 | 3.01 |
| OTTHUMG00000078275 | 3.35 | 3.74 | 2.96 |
| TSRM               | 3.35 | 3.90 | 3.13 |
| TAT                | 3.35 | 3.87 | 2.91 |
| ST8SIA3            | 3.35 | 3.78 | 2.82 |
| ASPA               | 3.35 | 4.56 | 2.64 |
| OTTHUMG00000165131 | 3.35 | 3.67 | 2.54 |
| SNORA70C           | 3.35 | 4.08 | 2.71 |
| OTTHUMG00000162990 | 3.35 | 3.81 | 2.85 |
| LINC00837          | 3.35 | 3.89 | 2.72 |
| RFADN              | 3.35 | 3.84 | 3.08 |
| BPIFB6             | 3.35 | 3.73 | 2.91 |
| CCDC67             | 3.35 | 3.67 | 2.77 |
| OR4P4              | 3.35 | 4.15 | 2.75 |
| OR5B2              | 3.35 | 4.31 | 2.64 |
| OTTHUMG00000160041 | 3.35 | 3.79 | 2.96 |
| SRGAP3-AS1         | 3.35 | 3.71 | 2.88 |
| MIR200B            | 3.35 | 3.79 | 3.07 |
| C16orf97           | 3.35 | 3.97 | 2.82 |
| OTTHUMG00000156168 | 3.35 | 3.74 | 3.13 |
| CDH8               | 3.35 | 3.95 | 2.90 |
| OTTHUMG00000169350 | 3.35 | 4.05 | 3.02 |
| PIWIL1             | 3.35 | 3.58 | 3.12 |
| C5orf52            | 3.35 | 3.88 | 3.00 |
| KRT222             | 3.35 | 3.75 | 2.94 |
| ZNF222             | 3.35 | 4.00 | 2.76 |
| KRT34              | 3.35 | 4.37 | 2.95 |
| KRTAP7-1           | 3.35 | 3.83 | 2.80 |
| LCE1F              | 3.35 | 4.70 | 2.29 |

|                    |      |      |      |
|--------------------|------|------|------|
| SLC22A3            | 3.35 | 3.64 | 2.74 |
| SNORD114-22        | 3.35 | 4.66 | 2.50 |
| MMP8               | 3.35 | 3.80 | 3.05 |
| CLRN1-AS1          | 3.35 | 3.93 | 3.05 |
| OTTHUMG00000157254 | 3.35 | 4.19 | 2.80 |
| C9                 | 3.35 | 4.14 | 2.90 |
| C12orf61           | 3.35 | 3.88 | 2.95 |
| LINC00366          | 3.35 | 3.80 | 3.13 |
| SEPT7P9            | 3.35 | 3.96 | 2.83 |
| OTTHUMG00000161457 | 3.35 | 4.06 | 2.98 |
| SLC9A4             | 3.35 | 3.59 | 2.88 |
| CR2                | 3.35 | 3.65 | 3.08 |
| OTTHUMG00000019126 | 3.35 | 3.79 | 3.13 |
| LOC100131910       | 3.35 | 3.68 | 2.96 |
| CHODL              | 3.35 | 3.67 | 3.00 |
| ZNF552             | 3.34 | 3.96 | 2.66 |
| SAMD15             | 3.34 | 3.91 | 2.83 |
| ID2B               | 3.34 | 3.82 | 2.77 |
| OTTHUMG00000163796 | 3.34 | 3.94 | 2.90 |
| OTTHUMG00000015698 | 3.34 | 4.25 | 2.95 |
| SLC9A2             | 3.34 | 3.52 | 3.14 |
| OTTHUMG00000167207 | 3.34 | 3.76 | 2.88 |
| HIST1H2APS1        | 3.34 | 3.76 | 2.99 |
| CCDC26             | 3.34 | 3.88 | 2.94 |
| LRRTM1             | 3.34 | 3.95 | 2.94 |
| CYP4A22            | 3.34 | 3.75 | 3.15 |
| CD80               | 3.34 | 3.55 | 3.07 |
| OTOGL              | 3.34 | 3.65 | 3.08 |
| FLJ31104           | 3.34 | 3.78 | 2.96 |
| OTTHUMG00000168500 | 3.34 | 3.73 | 2.88 |
| CCDC105            | 3.34 | 3.75 | 2.88 |
| SSTR3              | 3.34 | 3.95 | 2.65 |
| ZNF273             | 3.34 | 3.83 | 2.85 |
| ETV7               | 3.34 | 3.89 | 2.90 |
| OTTHUMG00000163295 | 3.34 | 3.67 | 3.07 |
| OTTHUMG00000151104 | 3.34 | 3.88 | 2.65 |
| LOC100507336       | 3.34 | 3.66 | 3.14 |
| LINC00598          | 3.34 | 3.56 | 3.02 |
| CXCL11             | 3.34 | 3.84 | 2.82 |
| C16orf96           | 3.34 | 4.09 | 2.99 |
| RNA5SP212          | 3.34 | 3.82 | 2.55 |
| CLDN20             | 3.34 | 3.86 | 2.92 |
| FAM154B            | 3.34 | 3.77 | 3.00 |
| PBOV1              | 3.34 | 3.92 | 3.05 |
| LOC100335030       | 3.34 | 3.85 | 3.03 |
| LINC00841          | 3.34 | 3.70 | 3.05 |
| LOC100133286       | 3.34 | 3.72 | 2.84 |
| FAM83B             | 3.34 | 3.82 | 2.72 |
| CXorf57            | 3.34 | 3.64 | 3.06 |

|                    |      |      |      |
|--------------------|------|------|------|
| LINC00881          | 3.34 | 3.85 | 2.93 |
| ZNF536             | 3.33 | 3.67 | 3.13 |
| LOC100133461       | 3.33 | 4.23 | 2.97 |
| LINC00934          | 3.33 | 3.78 | 2.95 |
| SERPINC1           | 3.33 | 3.61 | 3.01 |
| LOC100506630       | 3.33 | 3.69 | 3.05 |
| SNORD114-8         | 3.33 | 4.71 | 2.58 |
| LRIT2              | 3.33 | 4.09 | 2.95 |
| ZNF157             | 3.33 | 3.97 | 2.88 |
| PLEKHD1            | 3.33 | 3.91 | 3.03 |
| LOC286189          | 3.33 | 3.88 | 2.94 |
| MAGEB17            | 3.33 | 3.81 | 2.73 |
| NLRP14             | 3.33 | 3.80 | 2.92 |
| LINC00964          | 3.33 | 3.94 | 2.86 |
| SERPINI2           | 3.33 | 4.65 | 2.62 |
| OTTHUMG00000008401 | 3.33 | 3.73 | 2.99 |
| TRIM9              | 3.33 | 3.76 | 2.62 |
| ZNF430             | 3.33 | 4.18 | 2.47 |
| SLC22A16           | 3.33 | 3.81 | 3.08 |
| MIR3662            | 3.33 | 3.81 | 2.93 |
| OTTHUMG00000078274 | 3.33 | 3.77 | 3.02 |
| HIGD2B             | 3.33 | 3.70 | 2.91 |
| TTY9A              | 3.33 | 3.78 | 3.07 |
| PDYN               | 3.33 | 3.83 | 2.77 |
| LINC00643          | 3.33 | 4.13 | 2.84 |
| HORMAD1            | 3.33 | 3.63 | 3.01 |
| LOC100507534       | 3.33 | 4.09 | 2.45 |
| BPESC1             | 3.33 | 3.59 | 3.10 |
| OTTHUMG00000163335 | 3.33 | 3.85 | 2.97 |
| LINC00526          | 3.33 | 4.01 | 2.77 |
| FAM184A            | 3.33 | 3.90 | 3.00 |
| CCDC158            | 3.33 | 3.78 | 2.87 |
| RNF150             | 3.33 | 3.89 | 3.08 |
| C1orf74            | 3.33 | 3.84 | 2.94 |
| SCN3A              | 3.33 | 3.87 | 2.95 |
| LINC00670          | 3.33 | 3.76 | 2.81 |
| FMR1NB             | 3.33 | 3.65 | 3.10 |
| OTTHUMG00000153616 | 3.33 | 4.06 | 2.90 |
| TRAJ47             | 3.33 | 4.23 | 2.77 |
| CSN2               | 3.33 | 3.62 | 2.93 |
| OTTHUMG00000041465 | 3.33 | 4.13 | 2.74 |
| GPR19              | 3.33 | 3.88 | 3.03 |
| SLC5A7             | 3.33 | 3.98 | 2.80 |
| GK-AS1             | 3.33 | 4.16 | 2.75 |
| OTTHUMG00000171211 | 3.33 | 3.63 | 2.95 |
| FUT8-AS1           | 3.33 | 3.96 | 3.01 |
| FBXL22             | 3.33 | 3.70 | 3.13 |
| GATA4              | 3.33 | 3.92 | 3.00 |
| RNA5SP79           | 3.33 | 3.80 | 2.74 |

|                     |      |      |      |
|---------------------|------|------|------|
| IZUMO1              | 3.33 | 3.84 | 2.95 |
| OTTHUMG00000015230  | 3.33 | 3.56 | 3.00 |
| EN2                 | 3.33 | 3.63 | 2.75 |
| AQP4                | 3.33 | 3.76 | 2.80 |
| OTTHUMG000000165451 | 3.33 | 3.93 | 2.94 |
| TRPC5               | 3.33 | 3.61 | 2.83 |
| FTLP10              | 3.32 | 3.81 | 2.94 |
| OTTHUMG000000163701 | 3.32 | 4.12 | 2.43 |
| ZNF542              | 3.32 | 3.73 | 2.74 |
| IRS4                | 3.32 | 3.47 | 3.03 |
| OTTHUMG000000162103 | 3.32 | 4.61 | 2.66 |
| OTTHUMG000000164290 | 3.32 | 3.91 | 3.10 |
| OTTHUMG00000018931  | 3.32 | 3.86 | 2.97 |
| LINC00400           | 3.32 | 3.74 | 3.04 |
| OTTHUMG000000154373 | 3.32 | 3.65 | 2.56 |
| RFPL3S              | 3.32 | 3.85 | 2.67 |
| OTTHUMG000000034834 | 3.32 | 3.72 | 3.02 |
| DKFZp566F0947       | 3.32 | 3.69 | 2.83 |
| ATOH7               | 3.32 | 3.61 | 2.95 |
| LOC401410           | 3.32 | 3.79 | 2.78 |
| SMEK3P              | 3.32 | 3.73 | 2.99 |
| LOC100288310        | 3.32 | 4.24 | 2.88 |
| ANO4                | 3.32 | 4.21 | 2.44 |
| OR52N5              | 3.32 | 4.26 | 2.49 |
| SLC16A12            | 3.32 | 3.88 | 2.92 |
| ATAD3C              | 3.32 | 3.94 | 2.84 |
| LINC00533           | 3.32 | 4.04 | 2.52 |
| PMFBP1              | 3.32 | 3.80 | 3.02 |
| LOC100506837        | 3.32 | 3.79 | 2.99 |
| OTTHUMG000000152509 | 3.32 | 3.62 | 3.02 |
| LOC100505540        | 3.32 | 4.04 | 2.63 |
| TRPM8               | 3.32 | 3.76 | 2.97 |
| LINC00689           | 3.32 | 3.78 | 2.74 |
| KRTAP27-1           | 3.32 | 3.82 | 2.67 |
| WDFY2-AS1           | 3.32 | 3.82 | 2.42 |
| SPAM1               | 3.32 | 3.61 | 2.85 |
| TRPC7-AS2           | 3.32 | 3.57 | 3.07 |
| LGALS16             | 3.32 | 3.68 | 3.10 |
| PMAIP1              | 3.32 | 3.87 | 2.75 |
| ZNF567              | 3.32 | 4.14 | 2.54 |
| OTTHUMG000000167518 | 3.32 | 3.84 | 3.11 |
| RBP3                | 3.32 | 3.63 | 2.93 |
| TNFRSF17            | 3.32 | 3.95 | 2.80 |
| GSC2                | 3.32 | 3.98 | 3.05 |
| HOPX                | 3.32 | 3.80 | 2.90 |
| MIR200A             | 3.32 | 3.78 | 2.95 |
| IGSF11-AS1          | 3.32 | 3.82 | 2.65 |
| OTTHUMG00000015229  | 3.32 | 3.63 | 2.92 |
| SCARNA14            | 3.32 | 3.84 | 2.75 |



|                    |      |      |      |
|--------------------|------|------|------|
| CHODL-AS1          | 3.32 | 3.92 | 2.73 |
| OTTHUMG00000150586 | 3.32 | 3.86 | 2.88 |
| KIAA1210           | 3.32 | 3.90 | 2.94 |
| MIR128-2           | 3.32 | 3.65 | 3.04 |
| OTTHUMG00000019960 | 3.32 | 3.87 | 2.88 |
| CPA5               | 3.32 | 3.69 | 2.99 |
| CADM2              | 3.32 | 3.85 | 2.92 |
| LOC100507254       | 3.32 | 3.68 | 2.99 |
| DEPDC1             | 3.32 | 3.83 | 2.65 |
| LOC93432           | 3.32 | 3.77 | 2.92 |
| AKR1C6P            | 3.31 | 3.60 | 3.06 |
| MIR299             | 3.31 | 4.14 | 2.58 |
| OTTHUMG00000160549 | 3.31 | 3.72 | 2.93 |
| OTTHUMG00000164872 | 3.31 | 3.62 | 3.04 |
| DNAJB8-AS1         | 3.31 | 3.98 | 2.98 |
| MAGEB1             | 3.31 | 3.49 | 3.21 |
| OTTHUMG00000168140 | 3.31 | 3.71 | 3.00 |
| NELL2              | 3.31 | 3.53 | 3.10 |
| LINC00857          | 3.31 | 3.72 | 2.94 |
| FAM19A4            | 3.31 | 3.81 | 2.87 |
| PNPLA3             | 3.31 | 3.69 | 2.98 |
| OTTHUMG00000172302 | 3.31 | 3.63 | 2.98 |
| CHGB               | 3.31 | 3.65 | 2.82 |
| OR8D1              | 3.31 | 3.55 | 3.06 |
| OTTHUMG00000152562 | 3.31 | 4.17 | 2.37 |
| RAB3C              | 3.31 | 3.92 | 2.67 |
| FRMPD4             | 3.31 | 3.65 | 2.87 |
| PRG1               | 3.31 | 3.81 | 2.75 |
| LGALS17A           | 3.31 | 3.79 | 2.74 |
| LIN7A              | 3.31 | 3.65 | 3.13 |
| MIR532             | 3.31 | 3.84 | 3.04 |
| OTTHUMG00000159500 | 3.31 | 3.79 | 2.79 |
| HLA-AS1            | 3.31 | 3.59 | 2.76 |
| OTTHUMG00000022481 | 3.31 | 4.47 | 2.29 |
| OTTHUMG00000162517 | 3.31 | 3.68 | 2.97 |
| MGARP              | 3.31 | 3.68 | 2.82 |
| OTTHUMG00000011637 | 3.31 | 3.97 | 2.86 |
| TMED11P            | 3.31 | 3.58 | 2.98 |
| CLTC-IT1           | 3.31 | 3.78 | 2.84 |
| OTTHUMG00000183862 | 3.31 | 3.85 | 3.03 |
| PI15               | 3.31 | 5.29 | 2.56 |
| FGA                | 3.31 | 3.73 | 2.93 |
| MIR3139            | 3.30 | 4.27 | 2.69 |
| OTTHUMG00000150449 | 3.30 | 3.96 | 2.91 |
| OTTHUMG00000014261 | 3.30 | 4.12 | 2.75 |
| OTTHUMG00000170569 | 3.30 | 4.39 | 2.77 |
| OTTHUMG00000163650 | 3.30 | 3.61 | 3.08 |
| OTTHUMG00000031837 | 3.30 | 3.59 | 2.65 |
| OTTHUMG00000172376 | 3.30 | 3.68 | 2.99 |

|                    |      |      |      |
|--------------------|------|------|------|
| TRBV24-1           | 3.30 | 3.81 | 2.71 |
| FLJ10489           | 3.30 | 3.74 | 2.75 |
| OTTHUMG00000170121 | 3.30 | 3.84 | 3.03 |
| BEND7              | 3.30 | 3.92 | 2.91 |
| TACR3              | 3.30 | 3.66 | 2.81 |
| MIR627             | 3.30 | 4.38 | 2.51 |
| OTTHUMG00000170556 | 3.30 | 4.42 | 2.57 |
| ERP27              | 3.30 | 3.75 | 2.78 |
| NANOGB             | 3.30 | 3.72 | 2.92 |
| IL12A              | 3.30 | 3.60 | 3.14 |
| LIX1               | 3.30 | 3.74 | 3.03 |
| MIR2114            | 3.30 | 4.12 | 2.49 |
| OTTHUMG00000035577 | 3.30 | 3.97 | 2.83 |
| CDY1               | 3.30 | 3.70 | 2.85 |
| OTTHUMG00000165809 | 3.30 | 3.72 | 2.87 |
| LOC100505878       | 3.30 | 3.89 | 2.98 |
| USP6               | 3.30 | 3.88 | 2.83 |
| LINC00639          | 3.30 | 3.61 | 2.75 |
| HLA-DQB1           | 3.30 | 3.98 | 2.86 |
| SLC7A11            | 3.30 | 3.80 | 2.95 |
| OTTHUMG00000178553 | 3.30 | 3.93 | 2.79 |
| MIR1827            | 3.30 | 3.75 | 2.94 |
| KHDRBS2            | 3.30 | 3.80 | 2.84 |
| OTTHUMG00000153018 | 3.30 | 3.88 | 2.66 |
| TPRG1-AS2          | 3.30 | 4.01 | 2.81 |
| MIR137HG           | 3.30 | 3.65 | 2.94 |
| RXRG               | 3.30 | 3.62 | 2.87 |
| NOVA1-AS1          | 3.30 | 3.57 | 2.99 |
| LINC00466          | 3.30 | 3.61 | 2.77 |
| CXCL3              | 3.30 | 3.79 | 2.89 |
| ZIM3               | 3.30 | 3.99 | 2.80 |
| OTTHUMG00000179382 | 3.30 | 3.73 | 2.77 |
| EZR-AS1            | 3.30 | 3.61 | 2.74 |
| CYP4Z1             | 3.30 | 3.86 | 2.54 |
| OTTHUMG00000160728 | 3.30 | 3.65 | 2.92 |
| LOC100169752       | 3.30 | 3.90 | 2.73 |
| ELSPBP1            | 3.30 | 3.72 | 2.95 |
| OTTHUMG00000177616 | 3.30 | 3.59 | 2.90 |
| C1orf227           | 3.30 | 3.91 | 2.82 |
| MYH15              | 3.30 | 3.64 | 2.95 |
| TEKT3              | 3.29 | 3.56 | 2.95 |
| OR4E2              | 3.29 | 3.85 | 2.89 |
| CLPS               | 3.29 | 3.78 | 2.78 |
| LOC100507173       | 3.29 | 3.92 | 2.94 |
| RFX6               | 3.29 | 3.65 | 3.02 |
| RNA5SP290          | 3.29 | 3.86 | 2.47 |
| LHX4               | 3.29 | 3.55 | 3.18 |
| LOC100507556       | 3.29 | 3.62 | 2.93 |
| GPR98              | 3.29 | 3.73 | 2.97 |

|                    |      |      |      |
|--------------------|------|------|------|
| MIR4798            | 3.29 | 4.02 | 2.52 |
| LOC100506188       | 3.29 | 3.71 | 2.97 |
| OTTHUMG00000157196 | 3.29 | 3.63 | 3.04 |
| ZNF295-AS1         | 3.29 | 3.67 | 2.83 |
| PGR                | 3.29 | 4.15 | 2.62 |
| OTTHUMG00000152687 | 3.29 | 4.04 | 2.83 |
| KPNA7              | 3.29 | 3.87 | 2.91 |
| LARGE-AS1          | 3.29 | 3.89 | 2.76 |
| OTTHUMG00000160300 | 3.29 | 3.80 | 2.90 |
| OTTHUMG00000009144 | 3.29 | 3.61 | 2.68 |
| PGK2               | 3.29 | 4.13 | 2.74 |
| LINC00388          | 3.29 | 4.01 | 2.58 |
| MIR1258            | 3.29 | 4.38 | 2.96 |
| DYTN               | 3.29 | 4.03 | 2.68 |
| OTTHUMG00000160718 | 3.29 | 3.76 | 2.83 |
| PLCB2-AS1          | 3.29 | 3.78 | 2.98 |
| BCMO1              | 3.29 | 3.78 | 2.62 |
| OTTHUMG00000161289 | 3.29 | 3.72 | 2.68 |
| OTTHUMG00000042457 | 3.29 | 3.72 | 2.94 |
| FAM222A-AS1        | 3.29 | 3.66 | 3.09 |
| RNA5SP164          | 3.29 | 4.09 | 2.65 |
| RNU7-81P           | 3.29 | 3.97 | 2.65 |
| OTTHUMG00000059376 | 3.29 | 3.82 | 2.47 |
| NPVF               | 3.29 | 4.11 | 2.83 |
| RNF128             | 3.29 | 4.22 | 2.78 |
| PPEF2              | 3.29 | 3.80 | 2.94 |
| SPATA24            | 3.29 | 3.63 | 2.79 |
| LOC441233          | 3.29 | 3.86 | 2.66 |
| PRLR               | 3.29 | 3.81 | 2.89 |
| NKX2-3             | 3.29 | 3.66 | 2.73 |
| OTTHUMG00000164903 | 3.29 | 3.92 | 2.45 |
| OR52A5             | 3.29 | 3.60 | 2.91 |
| ANKRD26P3          | 3.28 | 3.95 | 2.65 |
| KCNQ5-AS1          | 3.28 | 3.72 | 2.48 |
| SLC28A1            | 3.28 | 3.90 | 2.73 |
| SERPINB7           | 3.28 | 3.96 | 2.84 |
| OTTHUMG00000041127 | 3.28 | 3.49 | 2.97 |
| CEACAM8            | 3.28 | 3.67 | 2.81 |
| DCAF8L2            | 3.28 | 3.68 | 2.87 |
| KCNV1              | 3.28 | 3.67 | 2.97 |
| HTR7               | 3.28 | 4.59 | 2.75 |
| MIR101-1           | 3.28 | 4.04 | 2.75 |
| TRAJ46             | 3.28 | 3.67 | 2.68 |
| SH3PXD2A-AS1       | 3.28 | 3.78 | 2.91 |
| LINC00222          | 3.28 | 3.84 | 2.72 |
| SNORD113-5         | 3.28 | 4.60 | 2.15 |
| FAM169A            | 3.28 | 3.55 | 2.97 |
| RAD51AP2           | 3.28 | 3.94 | 2.61 |
| LOC284100          | 3.28 | 3.92 | 2.68 |

|                    |      |      |      |
|--------------------|------|------|------|
| HNRNPCL1           | 3.28 | 3.88 | 2.78 |
| NAV2-AS5           | 3.28 | 3.73 | 2.69 |
| OTTHUMG00000086871 | 3.28 | 3.78 | 2.80 |
| OTTHUMG00000168183 | 3.28 | 3.93 | 2.77 |
| CST11              | 3.28 | 3.48 | 2.93 |
| OTTHUMG00000151422 | 3.28 | 3.70 | 2.72 |
| SLC2A2             | 3.28 | 3.96 | 2.80 |
| C1orf158           | 3.28 | 4.15 | 2.27 |
| MIR218-2           | 3.28 | 4.17 | 2.90 |
| NAV2-AS3           | 3.28 | 3.73 | 2.72 |
| LOC100288748       | 3.28 | 3.92 | 2.84 |
| OTTHUMG00000169604 | 3.28 | 4.09 | 2.76 |
| LOC653786          | 3.28 | 4.05 | 2.81 |
| BEND5              | 3.28 | 3.64 | 3.03 |
| GALNT13            | 3.28 | 3.55 | 2.70 |
| LOC441402          | 3.28 | 3.87 | 2.55 |
| SPRR2G             | 3.28 | 3.74 | 3.09 |
| MYF6               | 3.28 | 3.74 | 2.99 |
| MIR3529            | 3.28 | 4.74 | 2.43 |
| ARPP21             | 3.28 | 3.62 | 3.01 |
| SLC17A1            | 3.28 | 3.55 | 3.02 |
| OTTHUMG00000172245 | 3.28 | 4.08 | 2.73 |
| TDRG1              | 3.28 | 3.67 | 2.69 |
| MIR554             | 3.28 | 3.47 | 2.91 |
| BCL11A             | 3.28 | 3.86 | 2.99 |
| LOC641746          | 3.28 | 3.99 | 2.54 |
| OR6M1              | 3.28 | 3.88 | 2.90 |
| OTTHUMG00000169115 | 3.28 | 4.18 | 2.60 |
| OTTHUMG00000159881 | 3.27 | 4.00 | 2.72 |
| OTTHUMG00000163858 | 3.27 | 3.68 | 2.51 |
| OTTHUMG00000152138 | 3.27 | 3.94 | 2.75 |
| GPR128             | 3.27 | 3.62 | 2.94 |
| MACROD2-IT1        | 3.27 | 3.62 | 3.02 |
| TEX26-AS1          | 3.27 | 3.64 | 3.00 |
| SMIM9              | 3.27 | 3.54 | 2.89 |
| TRBV5-1            | 3.27 | 3.69 | 2.59 |
| OTTHUMG00000016477 | 3.27 | 3.66 | 2.98 |
| OTTHUMG00000164472 | 3.27 | 4.05 | 2.65 |
| MIR4487            | 3.27 | 4.51 | 2.85 |
| VHL                | 3.27 | 4.03 | 2.68 |
| GTSE1-AS1          | 3.27 | 3.72 | 2.85 |
| RNY4P1             | 3.27 | 4.49 | 2.05 |
| LANCL3             | 3.27 | 3.57 | 2.93 |
| OTTHUMG00000032784 | 3.27 | 3.72 | 2.90 |
| OTTHUMG00000140353 | 3.27 | 3.89 | 2.64 |
| RASSF10            | 3.27 | 3.73 | 2.91 |
| DCDC1              | 3.27 | 3.70 | 2.44 |
| ZNF441             | 3.27 | 3.83 | 2.36 |
| MYH8               | 3.27 | 4.20 | 2.81 |

|                    |      |      |      |
|--------------------|------|------|------|
| PKHD1L1            | 3.27 | 3.69 | 3.06 |
| LOC100505841       | 3.27 | 3.95 | 2.51 |
| OTTHUMG00000172301 | 3.27 | 4.07 | 2.89 |
| OTTHUMG00000018041 | 3.27 | 4.05 | 2.83 |
| ZNF674-AS1         | 3.27 | 3.58 | 2.62 |
| MIR4275            | 3.27 | 4.56 | 2.73 |
| LOC285422          | 3.27 | 4.38 | 2.65 |
| OR52E6             | 3.27 | 4.49 | 2.58 |
| OTTHUMG00000152366 | 3.27 | 3.71 | 2.85 |
| HOXB-AS5           | 3.27 | 3.72 | 2.93 |
| OTTHUMG00000161603 | 3.27 | 4.09 | 2.79 |
| PCDH15             | 3.27 | 3.86 | 2.99 |
| HMGA1P4            | 3.27 | 3.73 | 2.89 |
| OR4C13             | 3.27 | 3.55 | 2.93 |
| ENPP6              | 3.27 | 3.49 | 2.96 |
| RPUSD1             | 3.27 | 3.62 | 2.41 |
| OTTHUMG00000153330 | 3.27 | 4.08 | 2.78 |
| OTTHUMG00000166379 | 3.27 | 3.99 | 2.82 |
| PAK7               | 3.27 | 3.75 | 2.99 |
| OTTHUMG00000161218 | 3.27 | 4.72 | 2.68 |
| LOC100505799       | 3.27 | 4.25 | 2.59 |
| LOC100287225       | 3.27 | 3.85 | 2.96 |
| LOC286114          | 3.26 | 3.73 | 2.95 |
| MYO3B              | 3.26 | 3.78 | 2.82 |
| OTTHUMG00000015401 | 3.26 | 4.10 | 2.75 |
| TCN1               | 3.26 | 3.68 | 2.79 |
| LOC339593          | 3.26 | 3.83 | 2.90 |
| OTTHUMG00000160103 | 3.26 | 3.68 | 2.96 |
| CCDC169-SOHLH2     | 3.26 | 3.68 | 2.98 |
| SH2D1A             | 3.26 | 3.39 | 3.03 |
| LOC284688          | 3.26 | 3.81 | 2.85 |
| CRABP1             | 3.26 | 3.72 | 2.99 |
| MYBPC1             | 3.26 | 3.62 | 2.91 |
| IFNA22P            | 3.26 | 4.67 | 2.51 |
| OTTHUMG00000151429 | 3.26 | 3.72 | 3.03 |
| MIR764             | 3.26 | 3.52 | 2.87 |
| FAM45A             | 3.26 | 3.94 | 2.47 |
| SOS1-IT1           | 3.26 | 3.85 | 2.82 |
| CD48               | 3.26 | 3.78 | 2.50 |
| LOC101060360       | 3.26 | 3.80 | 2.83 |
| CLYBL-AS2          | 3.26 | 3.71 | 2.92 |
| CCDC79             | 3.26 | 3.61 | 3.01 |
| ADRA1A             | 3.26 | 3.65 | 2.87 |
| C17orf104          | 3.26 | 3.48 | 3.01 |
| KIAA2022           | 3.26 | 3.72 | 2.87 |
| LINC00423          | 3.26 | 4.09 | 2.64 |
| GEMIN2             | 3.26 | 3.75 | 2.96 |
| OTTHUMG00000154540 | 3.26 | 3.61 | 2.96 |
| OTTHUMG00000169910 | 3.26 | 3.85 | 2.76 |

|                    |      |      |      |
|--------------------|------|------|------|
| OTOA               | 3.26 | 3.69 | 2.82 |
| SCARNA1            | 3.26 | 4.23 | 2.41 |
| OTTHUMG00000170702 | 3.26 | 3.92 | 2.31 |
| CACNG7             | 3.26 | 3.76 | 2.78 |
| FAM216B            | 3.26 | 3.63 | 2.89 |
| UPK1A-AS1          | 3.26 | 3.52 | 2.78 |
| DNAJC5B            | 3.26 | 3.66 | 2.87 |
| TMEM202            | 3.26 | 3.67 | 2.78 |
| MIR3678            | 3.26 | 4.22 | 2.64 |
| EPHA7              | 3.26 | 3.57 | 2.71 |
| OTTHUMG00000152851 | 3.26 | 3.59 | 2.97 |
| AMY2B              | 3.25 | 3.64 | 2.62 |
| DLGAP2             | 3.25 | 3.83 | 2.81 |
| MIR641             | 3.25 | 3.79 | 2.92 |
| OTTHUMG00000170090 | 3.25 | 3.76 | 2.83 |
| TCP10L2            | 3.25 | 3.79 | 2.71 |
| CGA                | 3.25 | 3.60 | 2.96 |
| OTTHUMG00000159723 | 3.25 | 3.75 | 2.70 |
| TRPM1              | 3.25 | 4.03 | 2.77 |
| LOC729950          | 3.25 | 3.54 | 2.90 |
| LRRC7              | 3.25 | 4.03 | 2.75 |
| MIR3942            | 3.25 | 3.76 | 2.64 |
| SCRT1              | 3.25 | 3.68 | 2.83 |
| OTTHUMG00000159127 | 3.25 | 3.70 | 2.98 |
| LOC100130275       | 3.25 | 3.63 | 2.88 |
| ALKBH3-AS1         | 3.25 | 3.61 | 3.02 |
| SNX31              | 3.25 | 3.42 | 3.01 |
| OTTHUMG00000060638 | 3.25 | 3.98 | 2.69 |
| RNA5SP348          | 3.25 | 4.12 | 2.51 |
| NUP62CL            | 3.25 | 3.55 | 2.92 |
| SUCNR1             | 3.25 | 3.67 | 2.88 |
| OTTHUMG00000161282 | 3.25 | 3.59 | 2.79 |
| TRIML2             | 3.25 | 3.54 | 2.95 |
| IL5RA              | 3.25 | 3.73 | 3.03 |
| FAM35DP            | 3.25 | 4.32 | 2.50 |
| NRG1-IT1           | 3.25 | 3.66 | 2.63 |
| PABPC4L            | 3.25 | 3.70 | 2.83 |
| C10orf113          | 3.25 | 4.17 | 2.13 |
| EFCAB5             | 3.25 | 3.66 | 2.84 |
| SDC4P              | 3.25 | 3.53 | 2.91 |
| OTTHUMG00000166787 | 3.25 | 3.61 | 2.75 |
| RNA5SP211          | 3.25 | 4.19 | 2.40 |
| OTTHUMG00000160350 | 3.25 | 3.52 | 3.01 |
| VNN3               | 3.25 | 3.72 | 2.85 |
| RPE65              | 3.25 | 3.65 | 2.96 |
| DEFB126            | 3.25 | 3.76 | 2.90 |
| OTTHUMG00000018296 | 3.25 | 3.81 | 2.69 |
| OTTHUMG00000156144 | 3.25 | 3.83 | 2.94 |
| LOC100505518       | 3.25 | 3.84 | 2.87 |

|                    |      |      |      |
|--------------------|------|------|------|
| GYPA               | 3.25 | 3.73 | 2.71 |
| HSPA7              | 3.25 | 3.81 | 2.61 |
| MAP10              | 3.25 | 3.51 | 2.88 |
| MIR599             | 3.25 | 4.00 | 2.89 |
| NR0B1              | 3.25 | 3.62 | 2.72 |
| PLCXD2-AS1         | 3.25 | 3.93 | 2.80 |
| LINC00574          | 3.25 | 3.87 | 2.88 |
| OTTHUMG00000158944 | 3.25 | 3.67 | 2.67 |
| OTTHUMG00000151815 | 3.25 | 3.65 | 2.75 |
| OTTHUMG00000015993 | 3.25 | 4.15 | 2.67 |
| FLJ34503           | 3.25 | 3.73 | 2.73 |
| OR5A1              | 3.25 | 4.28 | 2.32 |
| C10orf111          | 3.25 | 3.62 | 2.98 |
| TDRD5              | 3.24 | 3.67 | 2.63 |
| OTTHUMG00000163153 | 3.24 | 4.01 | 2.62 |
| RPL13AP17          | 3.24 | 3.62 | 2.96 |
| C9orf43            | 3.24 | 3.92 | 2.97 |
| TEX15              | 3.24 | 3.73 | 2.76 |
| ZNF676             | 3.24 | 4.03 | 2.61 |
| SLCO1C1            | 3.24 | 3.97 | 2.48 |
| OTTHUMG00000161177 | 3.24 | 3.76 | 2.81 |
| LOC284788          | 3.24 | 3.83 | 2.87 |
| ODF1               | 3.24 | 3.47 | 2.99 |
| OTTHUMG00000163244 | 3.24 | 3.82 | 2.91 |
| OR2T1              | 3.24 | 4.31 | 2.62 |
| OTTHUMG00000167171 | 3.24 | 3.48 | 2.71 |
| FAM135B            | 3.24 | 3.89 | 2.72 |
| OR2F2              | 3.24 | 3.93 | 2.56 |
| TRAV8-6            | 3.24 | 3.97 | 2.87 |
| OTTHUMG00000160615 | 3.24 | 3.67 | 2.83 |
| LOC389247          | 3.24 | 3.66 | 2.43 |
| RACGAP1            | 3.24 | 3.66 | 2.61 |
| FAM74A2            | 3.24 | 3.77 | 2.83 |
| OTTHUMG00000164325 | 3.24 | 3.98 | 2.43 |
| LINC00645          | 3.24 | 3.75 | 2.82 |
| LOC100134040       | 3.24 | 3.72 | 2.93 |
| CCT8L2             | 3.24 | 3.61 | 3.00 |
| CNR2               | 3.24 | 3.65 | 2.90 |
| OTTHUMG00000017960 | 3.24 | 3.83 | 2.80 |
| LBX1               | 3.24 | 3.68 | 2.63 |
| OTTHUMG00000155617 | 3.24 | 3.58 | 2.85 |
| ATP6V0D2           | 3.24 | 4.81 | 2.49 |
| ANO3               | 3.24 | 3.64 | 2.79 |
| OTTHUMG00000016506 | 3.24 | 3.78 | 2.80 |
| C7orf76            | 3.24 | 3.54 | 2.73 |
| OTTHUMG00000156396 | 3.24 | 3.64 | 2.88 |
| OTTHUMG00000163848 | 3.24 | 4.12 | 2.34 |
| LOC727677          | 3.23 | 3.56 | 2.95 |
| RTKN2              | 3.23 | 3.61 | 2.87 |

|                    |      |      |      |
|--------------------|------|------|------|
| SPDYE3             | 3.23 | 3.62 | 2.50 |
| LEMD1              | 3.23 | 3.97 | 2.77 |
| GCNT4              | 3.23 | 4.06 | 2.83 |
| TRPA1              | 3.23 | 3.95 | 2.53 |
| OTTHUMG00000160881 | 3.23 | 3.72 | 2.78 |
| LINC00277          | 3.23 | 3.60 | 2.87 |
| C18orf42           | 3.23 | 3.62 | 2.84 |
| KDM5C-IT1          | 3.23 | 3.65 | 2.72 |
| PPBP               | 3.23 | 5.37 | 2.01 |
| GUCY2GP            | 3.23 | 3.58 | 2.74 |
| LINC00242          | 3.23 | 3.58 | 2.81 |
| OTTHUMG00000164937 | 3.23 | 3.73 | 2.87 |
| LOC286467          | 3.23 | 3.76 | 2.79 |
| CSMD3              | 3.23 | 3.64 | 2.94 |
| HRASLS             | 3.23 | 3.97 | 2.72 |
| HP11026            | 3.23 | 3.82 | 2.84 |
| OTTHUMG00000032099 | 3.23 | 4.22 | 2.39 |
| PRMT6              | 3.23 | 3.66 | 2.96 |
| MIR1271            | 3.23 | 3.55 | 2.56 |
| MIR4535            | 3.23 | 3.82 | 2.40 |
| LOC286238          | 3.23 | 3.91 | 2.95 |
| PCDHB11            | 3.23 | 3.85 | 2.66 |
| RNA5SP380          | 3.23 | 3.85 | 2.36 |
| OTTHUMG00000056666 | 3.23 | 3.71 | 2.94 |
| PYHIN1             | 3.23 | 3.77 | 2.74 |
| OTTHUMG00000015821 | 3.23 | 3.68 | 2.82 |
| TECTA              | 3.23 | 3.76 | 2.83 |
| LOC100128437       | 3.23 | 4.29 | 2.45 |
| OTTHUMG00000170368 | 3.23 | 3.78 | 2.92 |
| SLC26A3            | 3.23 | 3.55 | 2.77 |
| OTTHUMG00000032717 | 3.23 | 3.57 | 2.86 |
| IQCF1              | 3.23 | 3.60 | 2.73 |
| LOC729224          | 3.23 | 3.73 | 2.86 |
| OTTHUMG00000165748 | 3.23 | 3.97 | 2.90 |
| FGF16              | 3.23 | 4.09 | 2.52 |
| OTTHUMG00000056662 | 3.23 | 3.60 | 2.73 |
| OTTHUMG00000041347 | 3.23 | 3.57 | 2.77 |
| SPG20OS            | 3.22 | 3.63 | 2.57 |
| C22orf31           | 3.22 | 3.88 | 2.90 |
| LOC100129995       | 3.22 | 3.65 | 2.92 |
| OTTHUMG00000163982 | 3.22 | 3.71 | 2.72 |
| NR2F1-AS1          | 3.22 | 3.52 | 2.80 |
| SLC9A9-AS1         | 3.22 | 3.79 | 2.73 |
| EIF2B5-AS1         | 3.22 | 3.66 | 2.61 |
| TBC1D28            | 3.22 | 3.78 | 2.48 |
| OTTHUMG00000155767 | 3.22 | 3.97 | 2.79 |
| OTTHUMG00000033265 | 3.22 | 3.65 | 2.22 |
| RFPL1              | 3.22 | 3.68 | 2.72 |
| OTTHUMG00000150464 | 3.22 | 3.53 | 2.85 |



|                    |      |      |      |
|--------------------|------|------|------|
| OTTHUMG00000152593 | 3.22 | 3.76 | 2.74 |
| OTTHUMG00000160105 | 3.22 | 3.77 | 2.88 |
| PPY                | 3.22 | 4.09 | 2.27 |
| GRB14              | 3.22 | 3.66 | 2.86 |
| CFHR5              | 3.22 | 3.68 | 2.75 |
| OTTHUMG00000172296 | 3.22 | 3.83 | 2.68 |
| FMN2               | 3.22 | 3.53 | 2.87 |
| IGLV7-46           | 3.22 | 3.80 | 2.80 |
| OTTHUMG00000010848 | 3.22 | 3.69 | 2.90 |
| OTTHUMG00000172455 | 3.22 | 3.83 | 2.76 |
| KRTAP4-6           | 3.22 | 3.85 | 2.73 |
| BHLHE23            | 3.22 | 3.53 | 2.70 |
| LOC100506389       | 3.22 | 3.53 | 2.96 |
| RNA5SP398          | 3.22 | 3.72 | 2.66 |
| MEFV               | 3.22 | 3.70 | 2.68 |
| ASB11              | 3.22 | 3.55 | 2.97 |
| OTTHUMG00000179433 | 3.22 | 3.60 | 2.83 |
| ATP2B2-IT2         | 3.22 | 3.86 | 2.82 |
| HOXD13             | 3.22 | 3.80 | 2.84 |
| OTTHUMG00000166002 | 3.22 | 3.57 | 3.02 |
| TRHR               | 3.21 | 3.90 | 2.35 |
| OTTHUMG00000152016 | 3.21 | 3.48 | 2.93 |
| OR2AP1             | 3.21 | 3.70 | 2.72 |
| P2RY4              | 3.21 | 3.53 | 2.91 |
| SLC6A14            | 3.21 | 3.45 | 3.01 |
| OTTHUMG00000165125 | 3.21 | 3.72 | 2.75 |
| HIC1               | 3.21 | 3.63 | 2.86 |
| CYP1A1             | 3.21 | 3.66 | 2.72 |
| OTTHUMG00000164326 | 3.21 | 3.66 | 2.66 |
| TIGD4              | 3.21 | 3.66 | 2.97 |
| CHIAP2             | 3.21 | 3.66 | 2.94 |
| CCDC173            | 3.21 | 3.59 | 2.88 |
| GRID2              | 3.21 | 3.84 | 2.69 |
| ZNF385D            | 3.21 | 3.48 | 2.92 |
| NDUFAF4            | 3.21 | 3.85 | 2.64 |
| OTTHUMG00000158587 | 3.21 | 3.94 | 2.64 |
| MIR4287            | 3.21 | 3.97 | 2.37 |
| OR4A15             | 3.21 | 3.58 | 2.89 |
| REN                | 3.21 | 3.78 | 2.88 |
| OTTHUMG00000022291 | 3.21 | 3.58 | 2.83 |
| LOC100506776       | 3.21 | 3.68 | 2.88 |
| CAPNS2             | 3.21 | 3.78 | 2.83 |
| GRHL1              | 3.21 | 3.79 | 2.80 |
| LINC00307          | 3.21 | 3.63 | 2.96 |
| SLC22A24           | 3.21 | 3.49 | 2.91 |
| AADA4L4            | 3.21 | 3.59 | 2.84 |
| ARHGEF38           | 3.21 | 3.56 | 2.97 |
| HSFY2              | 3.21 | 3.63 | 2.67 |
| LOC152742          | 3.21 | 3.65 | 2.71 |

|                    |      |      |      |
|--------------------|------|------|------|
| WASF3-AS1          | 3.21 | 3.55 | 2.61 |
| ANKRD30BL          | 3.21 | 3.56 | 2.75 |
| OR8D2              | 3.21 | 3.86 | 2.41 |
| IQCF4              | 3.21 | 4.17 | 2.72 |
| OTTHUMG00000032757 | 3.21 | 3.56 | 2.76 |
| FAM27D1            | 3.21 | 3.52 | 3.02 |
| LOC100506705       | 3.21 | 3.67 | 2.58 |
| OR1E1              | 3.21 | 3.88 | 2.65 |
| FAM205B            | 3.21 | 4.01 | 2.51 |
| SPACA1             | 3.20 | 3.50 | 2.86 |
| OTTHUMG00000161903 | 3.20 | 3.72 | 2.74 |
| OTTHUMG00000086614 | 3.20 | 3.91 | 2.78 |
| CCL20              | 3.20 | 3.62 | 2.67 |
| KIAA0087           | 3.20 | 3.54 | 2.80 |
| HLA-H              | 3.20 | 4.06 | 2.54 |
| LINC00844          | 3.20 | 3.64 | 2.92 |
| C15orf48           | 3.20 | 3.50 | 3.04 |
| KRT24              | 3.20 | 3.65 | 2.85 |
| FAXC               | 3.20 | 3.71 | 2.69 |
| MIR4470            | 3.20 | 4.04 | 2.62 |
| OTTHUMG00000163990 | 3.20 | 3.60 | 2.83 |
| METTL21EP          | 3.20 | 3.69 | 2.72 |
| SLC22A10           | 3.20 | 3.43 | 2.90 |
| OTTHUMG00000177853 | 3.20 | 3.53 | 2.75 |
| IFNB1              | 3.20 | 3.71 | 2.96 |
| SLC2A9             | 3.20 | 3.60 | 2.84 |
| SMCO2              | 3.20 | 3.60 | 2.86 |
| OTTHUMG00000001278 | 3.20 | 3.86 | 2.85 |
| OTTHUMG00000154818 | 3.20 | 4.00 | 2.47 |
| OTTHUMG00000024091 | 3.20 | 3.69 | 2.44 |
| VSIG1              | 3.20 | 3.82 | 2.74 |
| TFEC               | 3.20 | 3.48 | 2.79 |
| SNORA54            | 3.20 | 3.78 | 2.48 |
| LOC100506546       | 3.20 | 3.73 | 2.85 |
| JARID2-AS1         | 3.20 | 3.64 | 2.61 |
| OTTHUMG00000155300 | 3.20 | 3.64 | 2.68 |
| CLEC6A             | 3.20 | 3.60 | 2.73 |
| MACC1              | 3.20 | 3.84 | 2.36 |
| LINC00443          | 3.20 | 3.59 | 2.79 |
| NSUN7              | 3.20 | 3.68 | 2.75 |
| ZNF675             | 3.20 | 3.93 | 2.23 |
| ABCC6P1            | 3.20 | 3.74 | 2.80 |
| LOC401980          | 3.20 | 3.75 | 2.88 |
| CDRT15L2           | 3.20 | 4.22 | 2.09 |
| CDS1               | 3.20 | 3.57 | 2.90 |
| DGCR10             | 3.20 | 3.93 | 2.45 |
| GC                 | 3.20 | 3.49 | 3.03 |
| OR4X1              | 3.20 | 3.71 | 2.69 |
| C10orf71-AS1       | 3.19 | 3.80 | 2.93 |

|                    |      |      |      |
|--------------------|------|------|------|
| OSTCP1             | 3.19 | 4.14 | 2.71 |
| OR6N1              | 3.19 | 3.69 | 2.45 |
| CLRN3              | 3.19 | 3.78 | 2.68 |
| RMST               | 3.19 | 3.48 | 2.75 |
| CYP2C9             | 3.19 | 3.69 | 2.75 |
| OTTHUMG00000148821 | 3.19 | 3.48 | 2.93 |
| OTTHUMG00000159698 | 3.19 | 3.74 | 2.66 |
| C5orf64            | 3.19 | 3.89 | 2.56 |
| IGKV2-24           | 3.19 | 4.40 | 2.04 |
| RNA5SP46           | 3.19 | 4.00 | 2.25 |
| DHRS9              | 3.19 | 3.50 | 2.76 |
| OTTHUMG00000151405 | 3.19 | 3.58 | 2.85 |
| SMIM1              | 3.19 | 3.56 | 2.80 |
| CCL1               | 3.19 | 3.59 | 2.81 |
| OTTHUMG00000172869 | 3.19 | 3.84 | 2.80 |
| IL17F              | 3.19 | 3.40 | 2.98 |
| SNORD115-17        | 3.19 | 4.39 | 2.35 |
| CDH10              | 3.19 | 3.66 | 2.59 |
| SPATA16            | 3.19 | 3.68 | 2.82 |
| RNA5SP273          | 3.19 | 4.07 | 1.98 |
| FAM69B             | 3.19 | 3.62 | 2.73 |
| OTTHUMG00000158757 | 3.19 | 3.98 | 2.77 |
| OTTHUMG00000132776 | 3.19 | 3.71 | 2.74 |
| NEFL               | 3.19 | 3.86 | 2.87 |
| RGSL1              | 3.19 | 3.59 | 2.73 |
| UNQ9370            | 3.19 | 3.73 | 2.80 |
| MTMR8              | 3.19 | 3.63 | 2.74 |
| LINC00343          | 3.19 | 3.65 | 2.78 |
| EMR3               | 3.19 | 3.53 | 2.84 |
| MIR4425            | 3.19 | 4.36 | 2.76 |
| LOC100873065       | 3.19 | 3.44 | 2.91 |
| RNA5SP361          | 3.19 | 4.17 | 2.46 |
| OTTHUMG00000164340 | 3.19 | 3.65 | 2.81 |
| ULBP3              | 3.19 | 3.41 | 2.69 |
| CYCSP52            | 3.19 | 3.75 | 2.54 |
| LOC100507600       | 3.18 | 3.86 | 2.53 |
| ADAM21             | 3.18 | 3.38 | 3.04 |
| OTTHUMG00000162046 | 3.18 | 3.63 | 2.74 |
| FGF6               | 3.18 | 3.48 | 2.84 |
| OTTHUMG00000160471 | 3.18 | 3.61 | 2.68 |
| OTTHUMG00000015516 | 3.18 | 3.74 | 2.59 |
| MMD2               | 3.18 | 3.69 | 2.88 |
| OTTHUMG00000162146 | 3.18 | 3.80 | 2.75 |
| ZNF23              | 3.18 | 3.60 | 2.87 |
| KCNC2              | 3.18 | 3.87 | 2.89 |
| ABCA9-AS1          | 3.18 | 3.93 | 2.33 |
| ACTN2              | 3.18 | 3.50 | 2.64 |
| MIR4729            | 3.18 | 3.94 | 2.17 |
| CWH43              | 3.18 | 3.59 | 2.94 |

|                    |      |      |      |
|--------------------|------|------|------|
| RBM46              | 3.18 | 3.39 | 2.82 |
| TMEM240            | 3.18 | 3.52 | 2.66 |
| CHCHD4P2           | 3.18 | 3.74 | 2.82 |
| OTTHUMG00000161686 | 3.18 | 3.89 | 2.43 |
| TLR8               | 3.18 | 3.85 | 2.34 |
| OTTHUMG00000163758 | 3.18 | 4.04 | 2.63 |
| OTTHUMG00000015002 | 3.18 | 3.64 | 2.83 |
| OTTHUMG00000162107 | 3.18 | 3.81 | 2.70 |
| RIMBP3B            | 3.18 | 4.18 | 2.26 |
| F11                | 3.18 | 3.59 | 2.87 |
| LOC100505827       | 3.18 | 4.11 | 2.56 |
| OTTHUMG00000014226 | 3.18 | 3.68 | 2.57 |
| RNA5SP418          | 3.18 | 4.07 | 2.22 |
| DBH-AS1            | 3.18 | 3.80 | 2.69 |
| LOC643486          | 3.18 | 4.35 | 1.76 |
| CALCR              | 3.18 | 3.70 | 2.55 |
| LOC100506675       | 3.18 | 3.42 | 2.80 |
| OTTHUMG00000158734 | 3.18 | 3.71 | 2.57 |
| C10orf40           | 3.18 | 3.65 | 2.89 |
| OTTHUMG00000161939 | 3.18 | 3.83 | 2.75 |
| MMP27              | 3.18 | 3.41 | 2.89 |
| SNORD70            | 3.18 | 3.92 | 2.29 |
| VN1R5              | 3.18 | 3.76 | 2.81 |
| CHIA               | 3.18 | 3.59 | 2.84 |
| TCHH               | 3.18 | 3.78 | 2.89 |
| LOC100996583       | 3.18 | 3.66 | 2.56 |
| NR1H4              | 3.17 | 3.48 | 2.93 |
| OR4F13P            | 3.17 | 3.59 | 2.69 |
| ACTG2              | 3.17 | 3.41 | 2.76 |
| GPR31              | 3.17 | 3.41 | 2.84 |
| OTTHUMG00000166791 | 3.17 | 3.90 | 2.69 |
| TCAM1P             | 3.17 | 3.41 | 2.68 |
| MIR1203            | 3.17 | 4.24 | 2.51 |
| TRAJ31             | 3.17 | 3.96 | 2.24 |
| OTTHUMG00000059745 | 3.17 | 3.54 | 2.85 |
| C4orf45            | 3.17 | 3.63 | 2.88 |
| OR5P3              | 3.17 | 3.62 | 2.88 |
| MIR130A            | 3.17 | 3.98 | 2.43 |
| FAM181B            | 3.17 | 3.90 | 2.64 |
| PHYHIPL            | 3.17 | 3.42 | 2.93 |
| OTTHUMG00000021757 | 3.17 | 3.42 | 3.01 |
| TRAJ34             | 3.17 | 4.07 | 2.01 |
| ASB5               | 3.17 | 3.63 | 2.80 |
| OTTHUMG00000158714 | 3.17 | 3.89 | 2.74 |
| MIR1912            | 3.17 | 3.48 | 2.94 |
| FAM90A25P          | 3.17 | 3.69 | 2.60 |
| GCSAML             | 3.17 | 3.54 | 2.89 |
| OR6J1              | 3.17 | 3.64 | 2.75 |
| AICDA              | 3.17 | 3.72 | 2.73 |

|                    |      |      |      |
|--------------------|------|------|------|
| OR51D1             | 3.17 | 3.78 | 2.76 |
| LINC00704          | 3.17 | 3.58 | 2.79 |
| OTTHUMG00000014922 | 3.17 | 4.11 | 2.78 |
| CPA2               | 3.17 | 3.77 | 2.61 |
| OTTHUMG00000178131 | 3.17 | 3.69 | 2.75 |
| OTTHUMG00000159058 | 3.17 | 3.61 | 2.70 |
| ANKRD7             | 3.17 | 3.48 | 2.96 |
| OTTHUMG00000160737 | 3.17 | 3.66 | 2.69 |
| LRRC72             | 3.17 | 3.48 | 2.79 |
| LOC401176          | 3.17 | 3.51 | 2.83 |
| OR2W5              | 3.17 | 3.81 | 2.79 |
| DEFB125            | 3.16 | 4.07 | 2.47 |
| NLRC4              | 3.16 | 3.47 | 2.67 |
| HYAL4              | 3.16 | 3.79 | 2.68 |
| RETNLB             | 3.16 | 3.47 | 2.80 |
| MGC32805           | 3.16 | 3.49 | 2.85 |
| RNA5SP305          | 3.16 | 4.16 | 2.51 |
| LINC00922          | 3.16 | 4.06 | 2.63 |
| OR5W2              | 3.16 | 3.63 | 2.79 |
| TRBV4-1            | 3.16 | 3.97 | 2.62 |
| LYST-AS1           | 3.16 | 4.00 | 2.37 |
| KTN1-AS1           | 3.16 | 3.59 | 2.88 |
| LOC100506444       | 3.16 | 3.51 | 2.74 |
| OTTHUMG00000162402 | 3.16 | 4.34 | 2.37 |
| LOC100506102       | 3.16 | 3.48 | 2.80 |
| OTTHUMG00000166055 | 3.16 | 3.93 | 2.59 |
| OTTHUMG00000162675 | 3.16 | 3.60 | 2.48 |
| LIPN               | 3.16 | 4.06 | 2.83 |
| ZNF346-IT1         | 3.16 | 3.82 | 2.66 |
| RMDN2-AS1          | 3.16 | 3.56 | 2.93 |
| FABP9              | 3.16 | 3.99 | 2.74 |
| SNORD19            | 3.16 | 3.85 | 2.65 |
| MIR4255            | 3.16 | 4.08 | 2.37 |
| NLRP11             | 3.16 | 3.85 | 2.74 |
| MIR2682            | 3.16 | 3.44 | 2.93 |
| CCL24              | 3.16 | 3.96 | 2.70 |
| DIRC1              | 3.16 | 3.74 | 2.23 |
| OR4Q3              | 3.16 | 3.81 | 2.76 |
| R3HDML             | 3.16 | 3.50 | 2.75 |
| UBE2E2-AS1         | 3.16 | 3.58 | 2.64 |
| OTTHUMG00000014282 | 3.16 | 3.53 | 2.67 |
| OTTHUMG00000153696 | 3.16 | 3.48 | 2.75 |
| LOC100508631       | 3.16 | 3.51 | 2.56 |
| CDH19              | 3.16 | 3.76 | 2.67 |
| GFRAL              | 3.16 | 3.46 | 2.93 |
| OTTHUMG00000152120 | 3.16 | 3.67 | 2.76 |
| HAO1               | 3.16 | 3.52 | 2.81 |
| GJE1               | 3.16 | 3.48 | 2.67 |
| PRDM7              | 3.16 | 3.82 | 2.42 |

|                    |      |      |      |
|--------------------|------|------|------|
| OTTHUMG00000031681 | 3.16 | 3.79 | 2.86 |
| OTTHUMG00000153466 | 3.16 | 3.63 | 2.83 |
| OTTHUMG00000172383 | 3.16 | 3.63 | 2.76 |
| OTTHUMG00000154203 | 3.16 | 3.51 | 2.96 |
| GNAT3              | 3.16 | 3.82 | 2.69 |
| MCMDC2             | 3.16 | 3.60 | 2.50 |
| ACBD7              | 3.16 | 3.60 | 2.69 |
| OTTHUMG00000168371 | 3.16 | 3.85 | 2.57 |
| OTTHUMG00000162584 | 3.16 | 3.78 | 2.61 |
| MROH2B             | 3.15 | 3.46 | 2.92 |
| OTTHUMG00000161706 | 3.15 | 3.60 | 2.69 |
| OTTHUMG00000154090 | 3.15 | 3.96 | 2.80 |
| TRBV3-1            | 3.15 | 3.85 | 2.83 |
| C17orf74           | 3.15 | 3.63 | 2.71 |
| GRAP               | 3.15 | 3.65 | 2.55 |
| OR8G2              | 3.15 | 4.42 | 2.02 |
| BTG4               | 3.15 | 4.09 | 2.79 |
| LOC100505835       | 3.15 | 3.73 | 2.86 |
| OR10AB1P           | 3.15 | 4.18 | 2.38 |
| DNAH8              | 3.15 | 3.74 | 2.75 |
| SNTN               | 3.15 | 3.53 | 2.80 |
| OTTHUMG00000162201 | 3.15 | 3.52 | 2.71 |
| FAM133B            | 3.15 | 3.63 | 2.78 |
| OTTHUMG00000169926 | 3.15 | 3.65 | 2.31 |
| OTTHUMG00000015708 | 3.15 | 3.36 | 2.71 |
| IGBP1P1            | 3.15 | 3.90 | 2.55 |
| KU-MEL-3           | 3.15 | 3.76 | 2.74 |
| SYTL5              | 3.15 | 3.32 | 2.97 |
| OTTHUMG00000162587 | 3.15 | 3.83 | 2.68 |
| OTTHUMG00000170587 | 3.15 | 4.13 | 2.53 |
| OTTHUMG00000183942 | 3.15 | 3.62 | 2.72 |
| ABCC12             | 3.15 | 3.75 | 2.76 |
| OTTHUMG00000171504 | 3.15 | 3.78 | 2.67 |
| MOS                | 3.14 | 3.56 | 2.70 |
| CLNK               | 3.14 | 3.56 | 2.90 |
| OTTHUMG00000152879 | 3.14 | 3.78 | 2.80 |
| CDX4               | 3.14 | 3.41 | 2.79 |
| JAKMIP1            | 3.14 | 3.52 | 2.85 |
| MIR548C            | 3.14 | 4.06 | 1.88 |
| GCG                | 3.14 | 3.60 | 2.81 |
| OTTHUMG00000015419 | 3.14 | 3.55 | 2.55 |
| ST6GAL2-IT1        | 3.14 | 4.43 | 1.90 |
| GBP7               | 3.14 | 3.75 | 2.67 |
| OTTHUMG00000172111 | 3.14 | 3.36 | 2.87 |
| RNA5SP265          | 3.14 | 4.08 | 2.63 |
| AMPD1              | 3.14 | 3.75 | 2.66 |
| OR13D1             | 3.14 | 3.96 | 2.44 |
| RNU6-51            | 3.14 | 4.31 | 2.30 |
| OTTHUMG00000168323 | 3.14 | 3.67 | 2.88 |

|                    |      |      |      |
|--------------------|------|------|------|
| FER1L6-AS2         | 3.14 | 3.55 | 2.72 |
| RNA5SP325          | 3.14 | 4.04 | 2.13 |
| ENPP5              | 3.14 | 3.64 | 2.61 |
| SLC24A5            | 3.14 | 3.48 | 2.70 |
| AQP4-AS1           | 3.14 | 3.73 | 2.72 |
| LOC339298          | 3.14 | 3.54 | 2.72 |
| TTY18              | 3.14 | 3.65 | 2.63 |
| BCL2L15            | 3.14 | 3.53 | 2.72 |
| ASB15              | 3.14 | 3.64 | 2.94 |
| LOC399815          | 3.14 | 3.97 | 2.58 |
| CNPY1              | 3.14 | 3.75 | 2.87 |
| CASP5              | 3.14 | 4.04 | 2.68 |
| LOC101060654       | 3.14 | 4.21 | 2.46 |
| SBF1P1             | 3.14 | 3.52 | 2.70 |
| OTTHUMG00000152029 | 3.13 | 3.61 | 2.66 |
| FAM9A              | 3.13 | 3.55 | 2.53 |
| PLCH1              | 3.13 | 3.41 | 2.74 |
| OR4S1              | 3.13 | 3.81 | 2.36 |
| IL26               | 3.13 | 3.56 | 2.77 |
| UTS2B              | 3.13 | 3.59 | 2.89 |
| KCNH5              | 3.13 | 3.57 | 2.78 |
| EYS                | 3.13 | 3.55 | 2.76 |
| POM121L4P          | 3.13 | 3.99 | 2.36 |
| ADAD1              | 3.13 | 3.52 | 2.86 |
| OTTHUMG00000155317 | 3.13 | 3.68 | 2.70 |
| GABRG3             | 3.13 | 3.60 | 2.73 |
| MIR1302-10         | 3.13 | 4.11 | 2.68 |
| SNORD96B           | 3.13 | 3.75 | 2.39 |
| OTTHUMG00000151631 | 3.13 | 3.51 | 2.70 |
| OTTHUMG00000161340 | 3.13 | 3.74 | 2.52 |
| OTTHUMG00000171379 | 3.13 | 3.69 | 2.67 |
| WWC2-AS1           | 3.13 | 4.10 | 2.45 |
| IL8                | 3.13 | 3.41 | 2.58 |
| SOX2-OT            | 3.13 | 3.58 | 2.64 |
| GALNT3             | 3.13 | 3.86 | 2.63 |
| AQP9               | 3.13 | 3.49 | 2.73 |
| ACTL7A             | 3.13 | 3.42 | 2.93 |
| KCNU1              | 3.13 | 3.43 | 2.77 |
| OTTHUMG00000015717 | 3.13 | 3.62 | 2.72 |
| CR1L               | 3.13 | 3.51 | 2.84 |
| GZMK               | 3.13 | 4.02 | 2.66 |
| OTTHUMG00000183907 | 3.13 | 3.62 | 2.74 |
| OR2B2              | 3.13 | 3.80 | 2.69 |
| SLC12A1            | 3.13 | 3.58 | 2.74 |
| MIR4478            | 3.13 | 3.66 | 2.79 |
| GPR37              | 3.13 | 3.46 | 2.67 |
| MC4R               | 3.13 | 3.54 | 2.63 |
| MIR4672            | 3.13 | 3.61 | 2.38 |
| OTTHUMG00000032808 | 3.13 | 3.60 | 2.75 |

|                    |      |      |      |
|--------------------|------|------|------|
| RNA5SP47           | 3.13 | 3.86 | 2.68 |
| BTBD8              | 3.13 | 3.81 | 2.78 |
| PRAMEF14           | 3.13 | 3.93 | 2.54 |
| ST8SIA6-AS1        | 3.13 | 3.49 | 2.77 |
| MUC15              | 3.13 | 3.61 | 2.68 |
| CES5A              | 3.13 | 3.62 | 2.78 |
| ERCC6L             | 3.13 | 3.32 | 2.94 |
| LOC100131796       | 3.12 | 3.55 | 2.59 |
| RNU1-15P           | 3.12 | 4.12 | 2.37 |
| ANXA13             | 3.12 | 3.73 | 2.69 |
| OTTHUMG00000009147 | 3.12 | 3.45 | 2.80 |
| TDRD1              | 3.12 | 3.77 | 2.69 |
| C17orf105          | 3.12 | 3.67 | 2.64 |
| OR10G2             | 3.12 | 3.75 | 2.50 |
| SCN1A              | 3.12 | 3.78 | 2.51 |
| FANCB              | 3.12 | 3.45 | 2.60 |
| HOXB5              | 3.12 | 3.37 | 2.64 |
| CTXN3              | 3.12 | 3.70 | 2.74 |
| GJB7               | 3.12 | 3.54 | 2.79 |
| RNA5SP76           | 3.12 | 3.56 | 2.80 |
| RNA5SP221          | 3.12 | 3.71 | 2.18 |
| OTTHUMG00000155853 | 3.12 | 3.39 | 2.82 |
| KCNH1-IT1          | 3.12 | 4.42 | 2.22 |
| OTTHUMG00000161880 | 3.12 | 3.86 | 2.48 |
| OTTHUMG00000001777 | 3.12 | 3.81 | 2.18 |
| TRAV13-2           | 3.12 | 3.70 | 2.70 |
| RN7SKP3            | 3.12 | 4.30 | 2.63 |
| LOC100509686       | 3.12 | 3.73 | 2.67 |
| OTTHUMG00000171305 | 3.12 | 3.64 | 2.76 |
| OTTHUMG00000161896 | 3.12 | 3.90 | 2.75 |
| TEKT1              | 3.12 | 3.44 | 2.87 |
| OTTHUMG00000156464 | 3.12 | 3.43 | 2.64 |
| BHLHA9             | 3.12 | 3.90 | 2.58 |
| SLC6A15            | 3.12 | 3.83 | 2.65 |
| OTTHUMG00000160893 | 3.12 | 3.38 | 2.75 |
| MIR3126            | 3.12 | 3.89 | 2.44 |
| OTTHUMG00000015959 | 3.12 | 3.65 | 2.89 |
| LINC00160          | 3.12 | 3.63 | 2.84 |
| MIR153-2           | 3.12 | 4.06 | 2.37 |
| OTTHUMG00000017651 | 3.12 | 3.73 | 2.55 |
| FLJ46066           | 3.12 | 3.50 | 2.47 |
| HIST1H2AH          | 3.12 | 3.38 | 2.67 |
| YBX2               | 3.12 | 3.54 | 2.54 |
| C21orf91-OT1       | 3.12 | 3.50 | 2.56 |
| OTTHUMG00000168702 | 3.12 | 3.71 | 2.58 |
| CCDC62             | 3.12 | 3.48 | 2.64 |
| OTTHUMG00000152116 | 3.12 | 4.32 | 2.63 |
| FABP1              | 3.11 | 3.43 | 2.87 |
| ZNF730             | 3.11 | 3.41 | 2.79 |



|                    |      |      |      |
|--------------------|------|------|------|
| PROSER2-AS1        | 3.11 | 3.86 | 2.62 |
| IGKV1D-8           | 3.11 | 4.05 | 2.36 |
| OTTHUMG00000163759 | 3.11 | 3.41 | 2.64 |
| OTTHUMG00000164050 | 3.11 | 4.04 | 2.48 |
| C12orf77           | 3.11 | 3.50 | 2.71 |
| OTTHUMG00000035890 | 3.11 | 3.79 | 2.48 |
| MIR628             | 3.11 | 3.70 | 2.62 |
| KCTD8              | 3.11 | 3.51 | 2.76 |
| INSL5              | 3.11 | 3.71 | 2.61 |
| MTRNR2L4           | 3.11 | 4.14 | 2.59 |
| OTTHUMG00000165032 | 3.11 | 3.39 | 2.86 |
| FAM108A4P          | 3.11 | 3.61 | 2.61 |
| LOC729121          | 3.11 | 3.53 | 2.84 |
| PLEKHG7            | 3.11 | 3.49 | 2.63 |
| ADH7               | 3.11 | 3.83 | 2.57 |
| TRBV4-2            | 3.11 | 4.03 | 2.72 |
| OTTHUMG00000015381 | 3.11 | 4.02 | 2.60 |
| GRIK1-AS1          | 3.11 | 3.34 | 2.73 |
| CLEC4GP1           | 3.11 | 3.87 | 2.04 |
| OTTHUMG00000017600 | 3.11 | 3.44 | 2.86 |
| TMEM244            | 3.11 | 3.23 | 2.99 |
| OTTHUMG00000159200 | 3.11 | 3.58 | 2.52 |
| TBC1D3P2           | 3.11 | 3.59 | 2.81 |
| FLJ46320           | 3.11 | 3.47 | 2.81 |
| FEZF1-AS1          | 3.11 | 3.52 | 2.85 |
| MIR7-3             | 3.11 | 3.54 | 2.70 |
| OTTHUMG00000170246 | 3.11 | 3.40 | 2.49 |
| LOC100505938       | 3.11 | 3.56 | 2.62 |
| ROPN1B             | 3.11 | 3.81 | 2.41 |
| RNA5SP319          | 3.11 | 3.85 | 2.54 |
| OTTHUMG00000009931 | 3.11 | 3.48 | 2.75 |
| MS4A1              | 3.11 | 3.60 | 2.51 |
| OTTHUMG00000172571 | 3.11 | 3.50 | 2.56 |
| CHRNA6             | 3.11 | 3.55 | 2.50 |
| RNU7-51P           | 3.11 | 3.92 | 2.41 |
| GABRR1             | 3.11 | 3.60 | 2.62 |
| OTTHUMG00000162826 | 3.11 | 3.52 | 2.78 |
| DDI1               | 3.11 | 3.38 | 2.88 |
| OTTHUMG00000169505 | 3.11 | 3.52 | 2.82 |
| STXBP5-AS1         | 3.11 | 3.48 | 2.73 |
| BCORP1             | 3.10 | 3.56 | 2.70 |
| KRTAP13-3          | 3.10 | 3.84 | 2.51 |
| OTTHUMG00000168427 | 3.10 | 3.70 | 2.79 |
| OTTHUMG00000171721 | 3.10 | 3.35 | 2.83 |
| DMP1               | 3.10 | 4.35 | 2.65 |
| LOC100287010       | 3.10 | 3.51 | 2.72 |
| LOC100034248       | 3.10 | 4.13 | 2.39 |
| RNA5SP503          | 3.10 | 3.58 | 2.46 |
| LOC100129297       | 3.10 | 3.52 | 2.81 |

|                    |      |      |      |
|--------------------|------|------|------|
| OTTHUMG00000020846 | 3.10 | 3.71 | 2.76 |
| FAM72B             | 3.10 | 4.19 | 2.17 |
| RAB27B             | 3.10 | 3.36 | 2.82 |
| GPC5-AS1           | 3.10 | 3.59 | 2.82 |
| OTTHUMG00000162192 | 3.10 | 4.18 | 2.69 |
| MIR548A1           | 3.10 | 4.23 | 2.32 |
| OTTHUMG00000159002 | 3.10 | 3.46 | 2.77 |
| PASD1              | 3.10 | 3.48 | 2.90 |
| OTTHUMG00000153854 | 3.10 | 3.74 | 2.80 |
| LINC00858          | 3.10 | 3.26 | 2.74 |
| OTTHUMG00000162363 | 3.10 | 3.97 | 2.38 |
| MIR16-1            | 3.10 | 3.54 | 2.64 |
| TSSK2              | 3.10 | 3.63 | 2.78 |
| ZP2                | 3.10 | 3.58 | 2.60 |
| DIRAS3             | 3.10 | 3.52 | 2.61 |
| OTTHUMG00000017086 | 3.10 | 4.05 | 2.52 |
| ENTHD1             | 3.10 | 3.42 | 2.54 |
| IL21-AS1           | 3.10 | 3.35 | 2.91 |
| OTTHUMG00000132063 | 3.10 | 3.44 | 2.67 |
| OTTHUMG00000163632 | 3.10 | 3.54 | 2.87 |
| ZNF560             | 3.10 | 3.67 | 2.58 |
| ADAM29             | 3.10 | 3.48 | 2.72 |
| LINC00880          | 3.10 | 3.55 | 2.61 |
| LOC100506394       | 3.10 | 3.65 | 2.38 |
| OTTHUMG00000150625 | 3.10 | 3.90 | 2.63 |
| OTTHUMG00000154836 | 3.10 | 3.55 | 2.59 |
| MIR4694            | 3.10 | 4.03 | 2.44 |
| SLC7A14            | 3.10 | 3.55 | 2.72 |
| OTTHUMG00000163835 | 3.09 | 3.87 | 2.54 |
| RAG2               | 3.09 | 3.50 | 2.72 |
| LY75               | 3.09 | 3.74 | 2.53 |
| CLEC2A             | 3.09 | 3.84 | 2.59 |
| ANGPTL3            | 3.09 | 3.62 | 2.75 |
| KIF5C              | 3.09 | 3.53 | 2.87 |
| MIR148A            | 3.09 | 4.01 | 2.12 |
| OTTHUMG00000165812 | 3.09 | 3.97 | 2.18 |
| OTTHUMG00000171039 | 3.09 | 3.67 | 2.77 |
| OTTHUMG00000178859 | 3.09 | 3.46 | 2.70 |
| DPP10              | 3.09 | 3.44 | 2.69 |
| OTTHUMG00000169950 | 3.09 | 3.69 | 2.59 |
| OTTHUMG00000169386 | 3.09 | 3.84 | 2.54 |
| OTTHUMG00000170076 | 3.09 | 3.71 | 2.69 |
| MIR335             | 3.09 | 3.75 | 2.68 |
| OTTHUMG00000164289 | 3.09 | 3.77 | 2.55 |
| LINC00635          | 3.09 | 3.75 | 2.71 |
| LOC100507363       | 3.09 | 3.37 | 2.63 |
| KRT32              | 3.09 | 3.42 | 2.76 |
| CYP7A1             | 3.09 | 3.58 | 2.62 |
| ANKRD30A           | 3.09 | 3.47 | 2.79 |

|                    |      |      |      |
|--------------------|------|------|------|
| OTTHUMG00000161302 | 3.09 | 3.50 | 2.80 |
| CLGN               | 3.09 | 3.65 | 2.68 |
| C10orf126          | 3.09 | 3.86 | 2.65 |
| TAS2R46            | 3.09 | 3.90 | 2.31 |
| MIR320C2           | 3.09 | 3.58 | 2.68 |
| OTTHUMG00000158709 | 3.09 | 3.58 | 2.91 |
| SLCO1A2            | 3.09 | 3.47 | 2.73 |
| OTTHUMG00000154158 | 3.09 | 3.79 | 2.39 |
| DGKB               | 3.09 | 3.37 | 2.99 |
| OTTHUMG00000162954 | 3.09 | 3.92 | 2.20 |
| OTTHUMG00000014332 | 3.09 | 3.75 | 2.39 |
| SPINK7             | 3.09 | 3.52 | 2.57 |
| LOC283435          | 3.09 | 4.20 | 2.56 |
| OTTHUMG00000171418 | 3.09 | 4.39 | 2.36 |
| NDUFAF4P1          | 3.09 | 3.54 | 2.38 |
| SNORD114-25        | 3.09 | 5.46 | 1.75 |
| MIR454             | 3.09 | 3.66 | 2.75 |
| OTTHUMG00000164063 | 3.09 | 3.46 | 2.69 |
| LDHAL6B            | 3.09 | 4.00 | 2.36 |
| ZNF229             | 3.09 | 3.56 | 2.45 |
| MIR4796            | 3.09 | 3.67 | 2.38 |
| TMC05A             | 3.09 | 3.52 | 2.74 |
| LOC100506274       | 3.08 | 3.52 | 2.57 |
| LINC00628          | 3.08 | 3.39 | 2.74 |
| OTTHUMG00000168468 | 3.08 | 3.73 | 2.61 |
| GABRG2             | 3.08 | 3.53 | 2.78 |
| OTTHUMG00000161900 | 3.08 | 3.42 | 2.72 |
| POU1F1             | 3.08 | 3.46 | 2.71 |
| RNU5E-7P           | 3.08 | 3.65 | 2.59 |
| LOC340074          | 3.08 | 3.68 | 2.50 |
| KLB                | 3.08 | 3.26 | 2.87 |
| OR9A2              | 3.08 | 3.39 | 2.54 |
| SLC13A1            | 3.08 | 3.38 | 2.79 |
| GPC5-AS2           | 3.08 | 3.93 | 2.75 |
| PTF1A              | 3.08 | 3.43 | 2.63 |
| LOC200726          | 3.08 | 3.61 | 2.59 |
| ARHGEF3-AS1        | 3.08 | 3.75 | 2.33 |
| TRAJ30             | 3.08 | 3.86 | 2.39 |
| LINC00393          | 3.08 | 3.67 | 2.87 |
| OTTHUMG00000086812 | 3.08 | 4.08 | 2.53 |
| FAM110C            | 3.08 | 4.07 | 2.52 |
| OR7G3              | 3.08 | 3.80 | 2.44 |
| OTTHUMG00000163985 | 3.08 | 3.62 | 2.71 |
| FNDC1-IT1          | 3.08 | 4.03 | 2.26 |
| C6orf141           | 3.08 | 3.46 | 2.67 |
| IGKV4-1            | 3.08 | 3.68 | 2.63 |
| EFCAB6-AS1         | 3.08 | 3.48 | 2.71 |
| GKN1               | 3.08 | 3.57 | 2.51 |
| LOC100507103       | 3.08 | 3.43 | 2.64 |

|                    |      |      |      |
|--------------------|------|------|------|
| SLC26A7            | 3.08 | 3.39 | 2.58 |
| FZD3               | 3.08 | 3.51 | 2.66 |
| OTTHUMG00000022476 | 3.08 | 3.35 | 2.83 |
| C10orf114          | 3.08 | 3.50 | 2.58 |
| SPANXA2-OT1        | 3.08 | 3.47 | 2.56 |
| OTTHUMG00000173394 | 3.08 | 3.27 | 2.87 |
| RNA5SP205          | 3.08 | 4.55 | 2.40 |
| CYP4F2             | 3.08 | 3.67 | 2.53 |
| GRM7               | 3.08 | 3.40 | 2.79 |
| OTTHUMG00000172319 | 3.08 | 3.46 | 2.79 |
| OTTHUMG00000156644 | 3.08 | 3.46 | 2.59 |
| RASSF9             | 3.08 | 3.67 | 2.52 |
| SLC4A10            | 3.08 | 3.45 | 2.68 |
| TM4SF4             | 3.07 | 3.32 | 2.78 |
| SULT2A1            | 3.07 | 3.62 | 2.66 |
| KCNK9              | 3.07 | 3.37 | 2.75 |
| OTTHUMG00000166216 | 3.07 | 3.40 | 2.56 |
| MIR520E            | 3.07 | 4.09 | 2.48 |
| TRAJ9              | 3.07 | 3.82 | 2.28 |
| KRTAP4-11          | 3.07 | 3.78 | 2.30 |
| OTTHUMG00000169974 | 3.07 | 4.43 | 2.53 |
| MIR455             | 3.07 | 3.36 | 2.80 |
| OR2B6              | 3.07 | 3.47 | 2.41 |
| OTTHUMG00000020254 | 3.07 | 3.57 | 2.57 |
| SLC27A2            | 3.07 | 3.62 | 2.66 |
| CXorf21            | 3.07 | 4.08 | 2.72 |
| WFDC11             | 3.07 | 3.29 | 2.59 |
| CHL1-AS1           | 3.07 | 3.31 | 2.59 |
| CCDC68             | 3.07 | 4.26 | 2.44 |
| FBXW12             | 3.07 | 3.50 | 2.53 |
| MIR1224            | 3.07 | 4.05 | 1.87 |
| RNA5SP159          | 3.07 | 3.87 | 2.18 |
| APOL1              | 3.07 | 3.63 | 2.64 |
| TDH                | 3.07 | 3.49 | 2.68 |
| OTTHUMG00000151746 | 3.07 | 3.34 | 2.78 |
| OTTHUMG00000169704 | 3.07 | 4.00 | 2.70 |
| DAOA-AS1           | 3.07 | 3.27 | 2.81 |
| NEUROD1            | 3.07 | 3.43 | 2.83 |
| OR4K17             | 3.07 | 3.42 | 2.64 |
| OTTHUMG00000155985 | 3.07 | 3.94 | 2.54 |
| SERPINB5           | 3.07 | 3.61 | 2.70 |
| LINC00692          | 3.07 | 3.42 | 2.80 |
| MRGPRX3            | 3.07 | 4.16 | 2.66 |
| C8orf56            | 3.07 | 3.55 | 2.45 |
| KRTAP19-1          | 3.07 | 3.50 | 2.70 |
| MIR4788            | 3.07 | 3.46 | 2.90 |
| ADAM5              | 3.07 | 3.46 | 2.55 |
| MIR613             | 3.07 | 3.44 | 2.55 |
| OTTHUMG00000161633 | 3.07 | 3.57 | 2.45 |

|                    |      |      |      |
|--------------------|------|------|------|
| DLEU7-AS1          | 3.07 | 3.49 | 2.81 |
| MAGEB3             | 3.07 | 3.56 | 2.63 |
| ORM2               | 3.07 | 3.91 | 2.54 |
| GBP5               | 3.07 | 3.48 | 2.48 |
| ZNF705B            | 3.07 | 3.70 | 2.64 |
| UBE2S              | 3.07 | 4.05 | 2.22 |
| LOC730159          | 3.06 | 3.54 | 2.55 |
| OTTHUMG00000162015 | 3.06 | 3.74 | 2.67 |
| OTTHUMG00000162327 | 3.06 | 3.48 | 2.67 |
| OTTHUMG00000167727 | 3.06 | 3.62 | 2.60 |
| FDCSP              | 3.06 | 3.65 | 2.38 |
| CAGE1              | 3.06 | 3.61 | 2.73 |
| RNU3P3             | 3.06 | 3.72 | 2.40 |
| FLJ33534           | 3.06 | 3.52 | 2.62 |
| TCL1B              | 3.06 | 3.69 | 2.23 |
| NKX2-1-AS1         | 3.06 | 3.28 | 2.82 |
| OVCH2              | 3.06 | 3.31 | 2.81 |
| OTTHUMG00000161058 | 3.06 | 3.43 | 2.43 |
| RIT2               | 3.06 | 3.78 | 2.81 |
| OTTHUMG00000041346 | 3.06 | 3.71 | 2.64 |
| OTTHUMG00000161651 | 3.06 | 3.53 | 2.59 |
| OR6C76             | 3.06 | 3.93 | 2.56 |
| PIP                | 3.06 | 3.27 | 2.76 |
| OTTHUMG00000168653 | 3.06 | 3.67 | 2.33 |
| TSLP               | 3.06 | 3.51 | 2.58 |
| BRD7P3             | 3.06 | 3.98 | 2.44 |
| OTTHUMG00000017017 | 3.06 | 3.47 | 2.54 |
| SORCS3             | 3.06 | 3.74 | 2.79 |
| SNORA31            | 3.06 | 3.93 | 2.19 |
| APOC1P1            | 3.06 | 3.72 | 2.44 |
| HAVCR1             | 3.06 | 3.72 | 2.67 |
| CD96               | 3.06 | 3.57 | 2.83 |
| MRPL42P5           | 3.06 | 3.67 | 2.48 |
| PCYT1B-AS1         | 3.06 | 3.65 | 2.58 |
| LOC100505776       | 3.06 | 3.49 | 2.87 |
| LOC650226          | 3.06 | 3.50 | 2.52 |
| TEX13A             | 3.06 | 3.55 | 2.72 |
| VSTM2A             | 3.06 | 3.46 | 2.76 |
| MCF2               | 3.06 | 3.72 | 2.60 |
| LINC00603          | 3.06 | 3.81 | 2.62 |
| TAS2R39            | 3.06 | 3.58 | 2.43 |
| OTTHUMG00000009987 | 3.06 | 3.48 | 2.46 |
| OTTHUMG00000003704 | 3.06 | 3.46 | 2.69 |
| ULBP1              | 3.05 | 4.14 | 2.13 |
| LOC646034          | 3.05 | 3.75 | 2.70 |
| OTTHUMG00000150005 | 3.05 | 3.65 | 2.65 |
| OTTHUMG00000161149 | 3.05 | 3.60 | 2.64 |
| TSPAN8             | 3.05 | 3.37 | 2.79 |
| IGLV1-50           | 3.05 | 3.59 | 2.32 |

|                    |      |      |      |
|--------------------|------|------|------|
| SNORD114-28        | 3.05 | 4.99 | 2.08 |
| CLCA3P             | 3.05 | 3.50 | 2.73 |
| COL4A5             | 3.05 | 3.37 | 2.74 |
| PRRG4              | 3.05 | 3.49 | 2.62 |
| FAM71D             | 3.05 | 3.37 | 2.68 |
| NAALAD2            | 3.05 | 3.57 | 2.51 |
| LOC100129175       | 3.05 | 4.14 | 2.64 |
| RNA5SP307          | 3.05 | 3.81 | 2.70 |
| SIM1               | 3.05 | 3.21 | 2.69 |
| MIR26A2            | 3.05 | 3.51 | 2.68 |
| HTN3               | 3.05 | 3.74 | 2.47 |
| LOC100505534       | 3.05 | 3.44 | 2.61 |
| OTTHUMG00000015005 | 3.05 | 3.80 | 2.72 |
| TEX36              | 3.05 | 3.66 | 2.60 |
| KRTAP2-4           | 3.05 | 4.09 | 2.63 |
| OTTHUMG00000040015 | 3.05 | 3.40 | 2.63 |
| LOC100505834       | 3.05 | 3.82 | 2.69 |
| OTTHUMG00000015227 | 3.05 | 3.27 | 2.71 |
| OTTHUMG00000015405 | 3.05 | 3.64 | 2.71 |
| LIPF               | 3.05 | 3.78 | 2.56 |
| OTTHUMG00000157098 | 3.05 | 3.54 | 2.56 |
| OTTHUMG00000163672 | 3.05 | 3.59 | 2.35 |
| MYH2               | 3.05 | 3.52 | 2.75 |
| TRAV26-2           | 3.05 | 4.13 | 2.10 |
| OTTHUMG00000167286 | 3.05 | 3.46 | 2.61 |
| DAOA               | 3.05 | 3.42 | 2.68 |
| KRT25              | 3.05 | 3.67 | 2.76 |
| OTTHUMG00000170374 | 3.05 | 3.41 | 2.56 |
| MYO1H              | 3.04 | 3.37 | 2.77 |
| LINC00272          | 3.04 | 4.03 | 2.55 |
| CNTN3              | 3.04 | 3.67 | 2.69 |
| ZCCHC13            | 3.04 | 3.40 | 2.70 |
| CCNB3              | 3.04 | 3.49 | 2.40 |
| KCNN2              | 3.04 | 3.64 | 2.68 |
| C14orf39           | 3.04 | 3.69 | 2.71 |
| IGLV2-23           | 3.04 | 3.81 | 2.24 |
| PYDC2              | 3.04 | 3.46 | 2.74 |
| APOH               | 3.04 | 3.67 | 2.54 |
| OTTHUMG00000163972 | 3.04 | 3.49 | 2.64 |
| TDO2               | 3.04 | 3.38 | 2.42 |
| C6orf222           | 3.04 | 3.43 | 2.57 |
| MIR4301            | 3.04 | 4.03 | 2.31 |
| GABRA2             | 3.04 | 3.57 | 2.62 |
| OTTHUMG00000161563 | 3.04 | 3.42 | 2.74 |
| EFNA4              | 3.04 | 3.40 | 2.51 |
| CNTN5              | 3.04 | 3.37 | 2.63 |
| MIR4420            | 3.04 | 4.00 | 2.37 |
| OTTHUMG00000156041 | 3.04 | 3.37 | 2.66 |
| MIR3609            | 3.04 | 3.73 | 2.25 |

|                    |      |      |      |
|--------------------|------|------|------|
| FAM197Y1           | 3.04 | 3.88 | 2.32 |
| TMPRSS11BNL        | 3.04 | 3.72 | 2.65 |
| LOC440934          | 3.04 | 3.57 | 2.68 |
| OTTHUMG00000175629 | 3.04 | 3.56 | 2.55 |
| MIR3663            | 3.04 | 3.72 | 2.67 |
| CNOT10-AS1         | 3.04 | 3.40 | 2.76 |
| MIR4659A           | 3.04 | 4.16 | 2.09 |
| RPS4Y2             | 3.04 | 3.91 | 2.33 |
| MIR505             | 3.04 | 3.73 | 2.38 |
| OR8K3              | 3.04 | 3.78 | 2.63 |
| DNAJB13            | 3.04 | 3.41 | 2.59 |
| PRL                | 3.04 | 3.40 | 2.63 |
| RFPL4B             | 3.04 | 3.65 | 2.47 |
| OTTHUMG00000162333 | 3.04 | 3.53 | 2.71 |
| TPTE2P1            | 3.04 | 3.69 | 2.42 |
| OTTHUMG00000152645 | 3.04 | 3.82 | 2.55 |
| KRTAP10-4          | 3.04 | 3.63 | 2.52 |
| OTTHUMG00000161728 | 3.03 | 3.78 | 2.42 |
| OTTHUMG00000183254 | 3.03 | 3.74 | 2.32 |
| DEFB110            | 3.03 | 3.49 | 2.43 |
| A2ML1-AS1          | 3.03 | 3.54 | 2.34 |
| OTTHUMG00000041229 | 3.03 | 3.40 | 2.66 |
| GOT1L1             | 3.03 | 3.20 | 2.85 |
| DMC1               | 3.03 | 3.56 | 2.69 |
| KRTAP19-4          | 3.03 | 3.62 | 2.70 |
| RNU6-56P           | 3.03 | 3.54 | 2.62 |
| SLC2A14            | 3.03 | 3.67 | 2.59 |
| RPS10P7            | 3.03 | 3.33 | 2.73 |
| DIO2-AS1           | 3.03 | 3.48 | 2.62 |
| TRAJ16             | 3.03 | 4.31 | 1.89 |
| TCEAL6             | 3.03 | 4.23 | 2.48 |
| CCR8               | 3.03 | 3.38 | 2.50 |
| GRIK2              | 3.03 | 3.57 | 2.53 |
| GRIA4              | 3.03 | 3.70 | 2.59 |
| DGCR6              | 3.03 | 3.72 | 2.55 |
| CDH18              | 3.03 | 3.46 | 2.72 |
| OTTHUMG00000155685 | 3.03 | 3.57 | 2.58 |
| MIR146B            | 3.03 | 4.03 | 2.20 |
| CHDC2              | 3.03 | 3.36 | 2.46 |
| ST8SIA6            | 3.03 | 3.69 | 2.42 |
| CENPH              | 3.03 | 3.33 | 2.54 |
| KIAA1024L          | 3.03 | 3.38 | 2.69 |
| TAS2R9             | 3.03 | 3.95 | 2.32 |
| SNORD115-25        | 3.03 | 4.18 | 2.23 |
| OTTHUMG00000151543 | 3.03 | 3.50 | 2.56 |
| HSD17B13           | 3.02 | 3.47 | 2.70 |
| OTTHUMG00000162886 | 3.02 | 3.72 | 2.58 |
| LOC100129055       | 3.02 | 3.53 | 2.59 |
| LOC100507205       | 3.02 | 3.55 | 2.57 |

|                    |      |      |      |
|--------------------|------|------|------|
| RPL10L             | 3.02 | 3.44 | 2.63 |
| RNA5SP501          | 3.02 | 3.84 | 1.88 |
| LOC100130331       | 3.02 | 3.27 | 2.78 |
| TTC6               | 3.02 | 3.35 | 2.80 |
| CTAGE11P           | 3.02 | 3.89 | 2.34 |
| RNA5SP31           | 3.02 | 3.51 | 2.64 |
| ZNF230             | 3.02 | 3.48 | 2.50 |
| LOC283352          | 3.02 | 3.75 | 2.67 |
| CELA3A             | 3.02 | 3.58 | 2.49 |
| LOC284998          | 3.02 | 3.83 | 2.51 |
| UTS2               | 3.02 | 3.57 | 2.42 |
| OTTHUMG00000165019 | 3.02 | 3.74 | 2.66 |
| TYRP1              | 3.02 | 3.53 | 2.55 |
| RNA5SP388          | 3.02 | 4.92 | 2.03 |
| OTTHUMG00000151362 | 3.02 | 3.36 | 2.72 |
| MAP3K19            | 3.02 | 3.46 | 2.71 |
| HS6ST3             | 3.02 | 3.35 | 2.67 |
| AGBL5-AS1          | 3.02 | 4.13 | 2.65 |
| OR8G5              | 3.02 | 3.89 | 2.54 |
| OTTHUMG00000170435 | 3.02 | 3.30 | 2.80 |
| TCEB3B             | 3.02 | 3.46 | 2.43 |
| OTTHUMG00000168950 | 3.02 | 3.39 | 2.61 |
| OTTHUMG00000150317 | 3.02 | 3.25 | 2.82 |
| NXF4               | 3.02 | 3.78 | 2.46 |
| OTTHUMG00000162767 | 3.02 | 3.38 | 2.60 |
| MIR514A1           | 3.01 | 4.44 | 2.11 |
| OTTHUMG00000161739 | 3.01 | 3.49 | 2.51 |
| OTTHUMG00000160219 | 3.01 | 3.65 | 2.58 |
| GDNF-AS1           | 3.01 | 3.42 | 2.73 |
| RNA5SP215          | 3.01 | 3.92 | 2.42 |
| FAM24A             | 3.01 | 3.35 | 2.77 |
| ZNF804A            | 3.01 | 3.27 | 2.72 |
| LOC729506          | 3.01 | 3.28 | 2.67 |
| OTTHUMG00000163132 | 3.01 | 3.33 | 2.69 |
| MIR199A1           | 3.01 | 3.89 | 2.39 |
| OTTHUMG00000037789 | 3.01 | 3.77 | 2.45 |
| MIR3690            | 3.01 | 3.65 | 2.31 |
| LOC100130452       | 3.01 | 3.24 | 2.73 |
| CNTN6              | 3.01 | 3.55 | 2.49 |
| TRAJ19             | 3.01 | 4.60 | 2.08 |
| OTTHUMG00000167285 | 3.01 | 3.65 | 2.35 |
| APOBEC3A           | 3.01 | 3.40 | 2.71 |
| OTTHUMG00000169544 | 3.01 | 3.36 | 2.73 |
| OTTHUMG00000162551 | 3.01 | 3.40 | 2.69 |
| C12orf56           | 3.01 | 3.99 | 2.59 |
| OTTHUMG00000019009 | 3.01 | 3.40 | 2.66 |
| C14orf105          | 3.01 | 3.41 | 2.69 |
| FAM194B            | 3.01 | 3.32 | 2.78 |
| GDF9               | 3.01 | 3.19 | 2.74 |



|                    |      |      |      |
|--------------------|------|------|------|
| LOC285878          | 3.01 | 3.37 | 2.70 |
| REG1P              | 3.01 | 3.41 | 2.50 |
| APOBEC1            | 3.01 | 3.80 | 2.43 |
| TRAV8-1            | 3.01 | 3.92 | 2.51 |
| PATE3              | 3.01 | 3.34 | 2.33 |
| VNN2               | 3.01 | 3.36 | 2.49 |
| OTTHUMG00000154769 | 3.01 | 3.37 | 2.74 |
| APBA2              | 3.01 | 3.43 | 2.41 |
| OR13H1             | 3.01 | 3.37 | 2.53 |
| CALB1              | 3.01 | 3.51 | 2.69 |
| FIGLA              | 3.01 | 3.64 | 2.65 |
| LCE1B              | 3.01 | 3.57 | 2.47 |
| MKRN3              | 3.01 | 3.58 | 2.61 |
| OTTHUMG00000163476 | 3.01 | 3.53 | 2.43 |
| BRWD1-IT1          | 3.01 | 3.79 | 2.48 |
| ELAVL2             | 3.00 | 3.93 | 2.15 |
| NIPAL1             | 3.00 | 3.33 | 2.58 |
| EVPLL              | 3.00 | 3.49 | 2.48 |
| OTTHUMG00000162888 | 3.00 | 3.64 | 2.58 |
| SMG7-AS1           | 3.00 | 3.51 | 2.33 |
| RNF148             | 3.00 | 3.21 | 2.68 |
| MIR3909            | 3.00 | 3.40 | 2.60 |
| OTTHUMG00000163634 | 3.00 | 3.39 | 2.75 |
| OTTHUMG00000164180 | 3.00 | 4.11 | 2.43 |
| ADAM18             | 3.00 | 3.53 | 2.67 |
| C8orf34            | 3.00 | 3.43 | 2.73 |
| OTTHUMG00000169070 | 3.00 | 3.39 | 2.70 |
| OTTHUMG00000170901 | 3.00 | 3.53 | 2.72 |
| KDM4E              | 3.00 | 3.21 | 2.83 |
| MIR331             | 3.00 | 3.70 | 2.56 |
| RNA5SP223          | 3.00 | 3.40 | 2.20 |
| HSD3B2             | 3.00 | 3.62 | 2.42 |
| TTPA               | 3.00 | 3.33 | 2.62 |
| OTTHUMG00000152676 | 3.00 | 3.74 | 2.67 |
| MIR4424            | 3.00 | 4.12 | 2.45 |
| OTTHUMG00000012411 | 3.00 | 3.31 | 2.68 |
| SH3GL3             | 3.00 | 3.45 | 2.67 |
| LINC00877          | 3.00 | 3.41 | 2.47 |
| NDST3              | 3.00 | 3.44 | 2.67 |
| OTTHUMG00000154465 | 3.00 | 3.46 | 2.56 |
| VTRNA1-2           | 3.00 | 3.85 | 2.52 |
| SLC25A3P1          | 3.00 | 3.40 | 2.42 |
| OTTHUMG00000018722 | 3.00 | 3.62 | 2.53 |
| OTTHUMG00000166009 | 3.00 | 3.22 | 2.62 |
| PTPRR              | 3.00 | 3.71 | 2.34 |
| LOC100506071       | 3.00 | 3.34 | 2.62 |
| OTTHUMG00000162785 | 3.00 | 3.35 | 2.58 |
| SKA1               | 3.00 | 3.49 | 2.65 |
| TPTE2P5            | 3.00 | 3.50 | 2.16 |

|                    |      |      |      |
|--------------------|------|------|------|
| LOC644215          | 3.00 | 3.54 | 2.62 |
| CFC1B              | 3.00 | 4.25 | 2.29 |
| KRTAP5-3           | 3.00 | 3.61 | 2.33 |
| OR52B4             | 3.00 | 3.33 | 2.67 |
| OTTHUMG00000158839 | 3.00 | 3.85 | 2.57 |
| LINC00862          | 2.99 | 3.33 | 2.64 |
| RN7SKP4            | 2.99 | 4.26 | 1.95 |
| FCGR1C             | 2.99 | 3.62 | 2.36 |
| MCHR2              | 2.99 | 3.73 | 2.55 |
| ANKRD33B-AS1       | 2.99 | 3.58 | 2.62 |
| LINC00624          | 2.99 | 3.49 | 2.61 |
| OTTHUMG00000015418 | 2.99 | 3.70 | 2.47 |
| GLOD5              | 2.99 | 3.58 | 2.24 |
| LOC100500773       | 2.99 | 3.36 | 2.50 |
| TLR8-AS1           | 2.99 | 3.42 | 2.60 |
| AKR1C4             | 2.99 | 3.74 | 2.70 |
| UNC13C             | 2.99 | 3.87 | 2.66 |
| IFNG-AS1           | 2.99 | 3.78 | 2.56 |
| OTTHUMG00000015478 | 2.99 | 3.60 | 2.38 |
| SATB2-AS1          | 2.99 | 3.31 | 2.58 |
| IFNK               | 2.99 | 3.39 | 2.57 |
| LOC541472          | 2.99 | 3.45 | 2.57 |
| OTTHUMG00000171322 | 2.99 | 3.46 | 2.25 |
| MAB21L3            | 2.99 | 3.53 | 2.44 |
| MIR617             | 2.99 | 3.37 | 2.58 |
| OR10R2             | 2.99 | 3.36 | 2.72 |
| OTTHUMG00000036137 | 2.99 | 3.38 | 2.69 |
| BBOX1              | 2.99 | 3.59 | 2.62 |
| C1orf185           | 2.99 | 3.23 | 2.61 |
| SRD5A2             | 2.99 | 3.39 | 2.69 |
| SLITRK6            | 2.99 | 3.50 | 2.57 |
| MIR196A1           | 2.99 | 3.92 | 2.39 |
| OTTHUMG00000155471 | 2.99 | 3.54 | 2.49 |
| LOC645752          | 2.99 | 3.91 | 2.49 |
| RGS21              | 2.99 | 3.65 | 2.71 |
| IFNA8              | 2.99 | 3.48 | 2.61 |
| RNA5-8SP3          | 2.99 | 3.63 | 2.47 |
| TBL1Y              | 2.99 | 3.40 | 2.17 |
| LOC100507377       | 2.99 | 3.27 | 2.75 |
| OTTHUMG00000164076 | 2.99 | 3.42 | 2.66 |
| TMPRSS11B          | 2.99 | 3.38 | 2.58 |
| FAM74A3            | 2.98 | 4.15 | 2.29 |
| OTTHUMG00000164459 | 2.98 | 3.39 | 2.72 |
| OTTHUMG00000165053 | 2.98 | 3.47 | 2.47 |
| SCAND3             | 2.98 | 3.75 | 2.36 |
| MIR26A1            | 2.98 | 3.25 | 2.56 |
| OTTHUMG00000171681 | 2.98 | 3.33 | 2.47 |
| G6PC2              | 2.98 | 3.27 | 2.69 |
| LINC00264          | 2.98 | 3.68 | 2.26 |

|                    |      |      |      |
|--------------------|------|------|------|
| SMIM21             | 2.98 | 3.72 | 2.38 |
| OR14J1             | 2.98 | 3.67 | 2.78 |
| OTTHUMG00000020094 | 2.98 | 3.28 | 2.62 |
| SLCO4C1            | 2.98 | 3.54 | 2.51 |
| OTTHUMG00000170520 | 2.98 | 3.52 | 2.26 |
| LOC730100          | 2.98 | 3.66 | 2.38 |
| PLAC1L             | 2.98 | 3.58 | 2.56 |
| OTTHUMG00000162167 | 2.98 | 3.45 | 2.53 |
| LOC100287944       | 2.98 | 3.57 | 2.28 |
| OTTHUMG00000180237 | 2.98 | 3.69 | 2.32 |
| OTTHUMG00000177159 | 2.98 | 3.29 | 2.72 |
| OTTHUMG00000169466 | 2.98 | 3.65 | 2.31 |
| OTTHUMG00000154970 | 2.98 | 3.33 | 2.58 |
| UGT3A1             | 2.98 | 3.50 | 2.61 |
| HIST1H2AB          | 2.98 | 3.47 | 2.52 |
| OR5M10             | 2.98 | 3.46 | 2.43 |
| PON1               | 2.98 | 3.79 | 2.55 |
| BIRC6-AS1          | 2.98 | 3.35 | 2.54 |
| LOC100505947       | 2.98 | 3.67 | 2.15 |
| OTTHUMG00000166246 | 2.98 | 3.41 | 2.64 |
| OTTHUMG00000170123 | 2.98 | 3.61 | 2.60 |
| LIPM               | 2.98 | 3.29 | 2.66 |
| LINC00948          | 2.98 | 3.33 | 2.66 |
| OTTHUMG00000167990 | 2.97 | 3.62 | 2.75 |
| OTTHUMG00000152394 | 2.97 | 3.84 | 2.68 |
| SOX3               | 2.97 | 3.48 | 2.59 |
| IL23R              | 2.97 | 3.37 | 2.67 |
| OTTHUMG00000161575 | 2.97 | 3.35 | 2.16 |
| OTTHUMG00000031780 | 2.97 | 3.55 | 2.55 |
| PRDM13             | 2.97 | 3.30 | 2.66 |
| SEPT14             | 2.97 | 3.49 | 2.60 |
| OR10Q1             | 2.97 | 3.64 | 2.37 |
| UBE2Q1-AS1         | 2.97 | 3.27 | 2.77 |
| OTTHUMG00000151742 | 2.97 | 3.44 | 2.39 |
| LOC645485          | 2.97 | 3.35 | 2.49 |
| OTTHUMG00000175839 | 2.97 | 3.46 | 2.19 |
| YEATS2-AS1         | 2.97 | 3.73 | 2.51 |
| DYNLRB2            | 2.97 | 3.54 | 2.52 |
| XKR7               | 2.97 | 3.28 | 2.63 |
| RNA5SP318          | 2.97 | 4.56 | 2.18 |
| OTTHUMG00000171374 | 2.97 | 3.45 | 2.64 |
| SYT14              | 2.97 | 3.59 | 2.38 |
| PLCE1-AS1          | 2.97 | 3.34 | 2.55 |
| PCDH11Y            | 2.97 | 3.29 | 2.58 |
| LINC00317          | 2.97 | 3.57 | 2.09 |
| IL1RAPL2           | 2.97 | 3.40 | 2.35 |
| LOC100129620       | 2.97 | 3.46 | 2.31 |
| OTTHUMG00000161225 | 2.97 | 3.44 | 2.24 |
| KBTD12             | 2.97 | 3.54 | 2.63 |

|                    |      |      |      |
|--------------------|------|------|------|
| LOC100506478       | 2.97 | 3.53 | 2.32 |
| LOC145694          | 2.97 | 3.33 | 2.55 |
| TBL1XR1-AS1        | 2.96 | 3.68 | 2.26 |
| CADPS              | 2.96 | 3.31 | 2.71 |
| MIR4513            | 2.96 | 3.39 | 2.47 |
| SPACA7             | 2.96 | 3.58 | 2.72 |
| OTTHUMG00000166516 | 2.96 | 3.31 | 2.63 |
| SLC9C2             | 2.96 | 3.38 | 2.64 |
| OTTHUMG00000017144 | 2.96 | 3.36 | 2.68 |
| OTTHUMG00000181788 | 2.96 | 3.30 | 2.77 |
| NPFFR2             | 2.96 | 3.19 | 2.69 |
| MDGA2              | 2.96 | 3.29 | 2.63 |
| RNA5SP494          | 2.96 | 4.29 | 1.84 |
| PARD6B             | 2.96 | 3.27 | 2.65 |
| OTTHUMG00000158945 | 2.96 | 3.18 | 2.65 |
| PEX5L-AS2          | 2.96 | 3.50 | 2.61 |
| ZNF582             | 2.96 | 3.34 | 2.54 |
| DNAH12             | 2.96 | 3.24 | 2.59 |
| OTTHUMG00000152377 | 2.96 | 3.90 | 2.65 |
| ACOT4              | 2.96 | 3.28 | 1.87 |
| LOC728084          | 2.96 | 3.28 | 2.73 |
| P2RY12             | 2.96 | 3.55 | 2.47 |
| OTTHUMG00000160738 | 2.96 | 3.49 | 2.63 |
| ADH1A              | 2.96 | 3.63 | 2.52 |
| FAM53A             | 2.96 | 3.45 | 2.16 |
| LOC100507546       | 2.96 | 3.20 | 2.68 |
| AREG               | 2.96 | 3.21 | 2.77 |
| RNA5SP230          | 2.96 | 3.77 | 1.98 |
| OTTHUMG00000020075 | 2.96 | 3.52 | 2.61 |
| OR8D4              | 2.96 | 3.42 | 2.38 |
| OTTHUMG00000180036 | 2.96 | 3.91 | 2.39 |
| SNORD12            | 2.96 | 3.61 | 2.12 |
| OR10V1             | 2.96 | 3.49 | 2.49 |
| CR1                | 2.95 | 3.22 | 2.49 |
| SUCLA2-AS1         | 2.95 | 3.59 | 2.24 |
| OTTHUMG00000150053 | 2.95 | 3.75 | 2.59 |
| DCUN1D2-AS1        | 2.95 | 3.49 | 2.57 |
| TNIP3              | 2.95 | 3.45 | 2.49 |
| NOL4               | 2.95 | 3.45 | 2.61 |
| C1QTNF1-AS1        | 2.95 | 3.16 | 2.60 |
| HOK1               | 2.95 | 3.72 | 2.52 |
| TRAJ38             | 2.95 | 3.64 | 2.25 |
| PRAC               | 2.95 | 3.21 | 2.72 |
| OTTHUMG00000163521 | 2.95 | 3.69 | 2.46 |
| LINC00279          | 2.95 | 3.46 | 2.58 |
| PDE11A             | 2.95 | 3.32 | 2.46 |
| GML                | 2.95 | 3.23 | 2.60 |
| LINC00507          | 2.95 | 3.45 | 2.56 |
| F9                 | 2.95 | 3.34 | 2.33 |

|                    |      |      |      |
|--------------------|------|------|------|
| RNA5SP505          | 2.95 | 3.89 | 1.98 |
| KRT73              | 2.95 | 3.27 | 2.58 |
| LINC00477          | 2.95 | 3.46 | 2.44 |
| TAS2R13            | 2.95 | 3.18 | 2.55 |
| OTTHUMG00000165905 | 2.95 | 3.56 | 2.47 |
| LINC00499          | 2.95 | 3.76 | 2.37 |
| LINC00596          | 2.95 | 3.45 | 2.37 |
| CYP2C18            | 2.95 | 3.61 | 2.36 |
| PP12613            | 2.95 | 3.48 | 2.47 |
| MIR4473            | 2.95 | 3.59 | 2.58 |
| OR7A5              | 2.95 | 3.44 | 2.49 |
| OTTHUMG00000008929 | 2.95 | 3.37 | 2.50 |
| FAM72A             | 2.95 | 3.76 | 2.25 |
| BTF3P11            | 2.95 | 3.58 | 2.64 |
| DDX4               | 2.95 | 3.48 | 2.61 |
| MIR148B            | 2.94 | 3.69 | 2.30 |
| MIR550A3           | 2.94 | 4.35 | 2.36 |
| OTTHUMG00000162881 | 2.94 | 3.64 | 2.50 |
| TRIM51GP           | 2.94 | 3.54 | 2.44 |
| TMEM156            | 2.94 | 3.37 | 2.69 |
| LPPR5              | 2.94 | 3.46 | 2.52 |
| OPCML-IT2          | 2.94 | 3.34 | 2.63 |
| OTTHUMG00000161634 | 2.94 | 3.45 | 2.42 |
| RBMV2FP            | 2.94 | 3.57 | 1.99 |
| OTTHUMG00000166007 | 2.94 | 3.28 | 2.58 |
| OTTHUMG00000171367 | 2.94 | 3.28 | 2.13 |
| OLAH               | 2.94 | 3.33 | 2.48 |
| ZNF573             | 2.94 | 3.22 | 2.35 |
| OTTHUMG00000168465 | 2.94 | 3.70 | 2.40 |
| OTTHUMG00000181983 | 2.94 | 3.55 | 2.43 |
| MIR4706            | 2.94 | 3.70 | 2.49 |
| GRXCR1             | 2.94 | 3.39 | 2.63 |
| SYCP2L             | 2.94 | 3.20 | 2.52 |
| CPB2               | 2.94 | 3.23 | 2.62 |
| SLC24A2            | 2.94 | 3.24 | 2.66 |
| CHL1-AS2           | 2.94 | 3.58 | 2.31 |
| VENTXP7            | 2.94 | 3.35 | 2.53 |
| LINC00238          | 2.94 | 3.33 | 2.43 |
| MIR1255B1          | 2.94 | 3.25 | 2.75 |
| TRIM77             | 2.94 | 3.23 | 2.67 |
| OTTHUMG00000166558 | 2.94 | 3.36 | 2.59 |
| OTTHUMG00000153757 | 2.94 | 3.59 | 2.55 |
| KRT33A             | 2.94 | 3.64 | 2.43 |
| OTTHUMG00000032884 | 2.94 | 3.58 | 2.39 |
| LOC100506474       | 2.94 | 3.22 | 2.64 |
| OTTHUMG00000172151 | 2.94 | 3.45 | 2.70 |
| LINC00545          | 2.94 | 3.25 | 2.44 |
| FAM27E1            | 2.94 | 3.70 | 2.09 |
| OTTHUMG00000014123 | 2.93 | 3.56 | 2.60 |

|                    |      |      |      |
|--------------------|------|------|------|
| FLJ25758           | 2.93 | 3.33 | 2.39 |
| LOC283692          | 2.93 | 3.18 | 2.63 |
| OTTHUMG00000171400 | 2.93 | 3.29 | 2.53 |
| TMEM247            | 2.93 | 3.20 | 2.48 |
| MIR3169            | 2.93 | 3.78 | 2.46 |
| OTTHUMG00000159462 | 2.93 | 3.79 | 2.67 |
| VN1R1              | 2.93 | 3.53 | 2.69 |
| TRAV10             | 2.93 | 3.81 | 2.29 |
| FLJ45964           | 2.93 | 3.27 | 2.67 |
| OTTHUMG00000162559 | 2.93 | 3.17 | 2.46 |
| CARD18             | 2.93 | 3.83 | 2.44 |
| DEFA6              | 2.93 | 3.57 | 2.55 |
| SERPINB10          | 2.93 | 3.47 | 2.44 |
| SPP2               | 2.93 | 3.31 | 2.57 |
| MIR4432            | 2.93 | 3.68 | 2.28 |
| LOC728606          | 2.93 | 3.22 | 2.67 |
| OTOR               | 2.93 | 3.23 | 2.50 |
| ELOVL3             | 2.93 | 3.27 | 2.47 |
| OTTHUMG00000171352 | 2.93 | 3.54 | 2.50 |
| CHEK2P2            | 2.93 | 3.66 | 2.27 |
| MIR23C             | 2.93 | 3.22 | 2.61 |
| TMSB15A            | 2.93 | 3.83 | 1.92 |
| MIR524             | 2.93 | 3.44 | 2.66 |
| SCN7A              | 2.93 | 3.18 | 2.64 |
| POMC               | 2.92 | 3.31 | 2.18 |
| LINC00244          | 2.92 | 3.45 | 2.58 |
| TRPC5OS            | 2.92 | 3.64 | 2.52 |
| GPHB5              | 2.92 | 3.38 | 2.63 |
| OTTHUMG00000018058 | 2.92 | 3.19 | 2.58 |
| DEFB135            | 2.92 | 3.20 | 2.63 |
| OTTHUMG00000171373 | 2.92 | 3.29 | 2.48 |
| CELA2B             | 2.92 | 3.45 | 2.26 |
| MND1               | 2.92 | 3.63 | 2.35 |
| OTTHUMG00000164966 | 2.92 | 3.40 | 2.25 |
| NRCAM              | 2.92 | 3.26 | 2.60 |
| HSPB8              | 2.92 | 3.13 | 2.56 |
| OTTHUMG00000167824 | 2.92 | 3.38 | 2.20 |
| OTTHUMG00000017769 | 2.92 | 3.39 | 2.57 |
| OTTHUMG00000163008 | 2.92 | 3.19 | 2.60 |
| MIR296             | 2.92 | 3.97 | 2.10 |
| OTTHUMG00000166257 | 2.92 | 3.39 | 2.23 |
| LOC100129213       | 2.92 | 3.39 | 2.38 |
| OTTHUMG00000158586 | 2.92 | 3.41 | 2.56 |
| OTTHUMG00000000481 | 2.92 | 3.39 | 2.52 |
| MAGEB2             | 2.92 | 3.48 | 2.28 |
| IL22RA2            | 2.92 | 3.50 | 2.55 |
| SKAP1              | 2.92 | 3.26 | 2.43 |
| OTTHUMG00000172163 | 2.92 | 3.31 | 2.39 |
| OTTHUMG00000171798 | 2.92 | 3.61 | 2.35 |

|                    |      |      |      |
|--------------------|------|------|------|
| OTTHUMG00000165261 | 2.92 | 3.42 | 2.61 |
| OTTHUMG00000019540 | 2.92 | 3.59 | 2.12 |
| OTTHUMG00000167330 | 2.92 | 3.62 | 2.49 |
| ZPBP2              | 2.92 | 3.54 | 2.69 |
| OR8K5              | 2.91 | 3.40 | 2.30 |
| MIR100             | 2.91 | 4.14 | 2.01 |
| OR1C1              | 2.91 | 3.49 | 2.45 |
| SCARNA18           | 2.91 | 3.35 | 2.38 |
| PEX5L-AS1          | 2.91 | 3.96 | 2.11 |
| CHST9              | 2.91 | 3.44 | 2.62 |
| IMPG1              | 2.91 | 3.32 | 2.50 |
| OR4F6              | 2.91 | 3.24 | 2.55 |
| WDR87              | 2.91 | 3.30 | 2.54 |
| RNU7-19P           | 2.91 | 4.44 | 2.12 |
| HIST1H4B           | 2.91 | 3.66 | 2.19 |
| OTTHUMG00000032473 | 2.91 | 3.44 | 2.46 |
| TLL2               | 2.91 | 3.71 | 2.48 |
| HEMGN              | 2.91 | 3.72 | 2.34 |
| OTTHUMG00000163792 | 2.91 | 3.39 | 2.50 |
| FAM19A3            | 2.91 | 3.23 | 2.51 |
| RNA5SP119          | 2.91 | 4.75 | 1.91 |
| PIH1D3             | 2.91 | 3.27 | 2.53 |
| OTTHUMG00000160894 | 2.91 | 3.41 | 2.52 |
| GRPR               | 2.91 | 3.21 | 2.69 |
| LOC257358          | 2.91 | 3.38 | 2.42 |
| OTTHUMG00000162882 | 2.91 | 3.49 | 2.60 |
| MIRLET7F1          | 2.91 | 4.77 | 1.60 |
| LINC00901          | 2.91 | 3.29 | 2.33 |
| PYDC1              | 2.91 | 3.50 | 2.24 |
| ZFP42              | 2.91 | 3.59 | 2.50 |
| C2orf83            | 2.91 | 3.44 | 2.49 |
| OR6A2              | 2.91 | 3.29 | 2.66 |
| SLC26A5            | 2.91 | 3.40 | 2.31 |
| MIR942             | 2.91 | 3.39 | 2.64 |
| LOC100506827       | 2.91 | 3.26 | 2.47 |
| OTTHUMG00000161740 | 2.91 | 3.24 | 2.60 |
| OTTHUMG00000174454 | 2.91 | 3.20 | 2.69 |
| SSX9               | 2.91 | 3.54 | 2.34 |
| OTTHUMG00000169418 | 2.91 | 3.08 | 2.46 |
| OTTHUMG00000018736 | 2.91 | 3.63 | 2.41 |
| RNU6-52P           | 2.91 | 4.09 | 2.15 |
| OTTHUMG00000165334 | 2.91 | 3.38 | 2.40 |
| ACTBL2             | 2.91 | 3.61 | 2.12 |
| SDR16C6P           | 2.91 | 3.43 | 2.65 |
| NPY5R              | 2.91 | 3.24 | 2.56 |
| CBX3P2             | 2.91 | 3.14 | 2.69 |
| OTTHUMG00000161342 | 2.91 | 3.68 | 2.47 |
| OTTHUMG00000015400 | 2.91 | 3.38 | 2.57 |
| SLC15A5            | 2.91 | 3.59 | 2.50 |

|                    |      |      |      |
|--------------------|------|------|------|
| LOC100996263       | 2.90 | 3.13 | 2.52 |
| ENKUR              | 2.90 | 3.36 | 2.57 |
| LOC653653          | 2.90 | 3.63 | 2.25 |
| OTTHUMG00000159221 | 2.90 | 3.36 | 2.47 |
| PDE6C              | 2.90 | 3.26 | 2.66 |
| MIR608             | 2.90 | 3.19 | 2.59 |
| MOXD2P             | 2.90 | 3.53 | 2.29 |
| OTTHUMG00000169456 | 2.90 | 3.26 | 2.57 |
| CDH9               | 2.90 | 3.36 | 2.54 |
| OTTHUMG00000172020 | 2.90 | 3.32 | 2.42 |
| OTTHUMG00000161213 | 2.90 | 3.37 | 1.94 |
| CPA6               | 2.90 | 3.42 | 2.61 |
| KGFLP1             | 2.90 | 3.25 | 2.32 |
| LINC00235          | 2.90 | 3.45 | 2.52 |
| OTTHUMG00000158949 | 2.90 | 3.41 | 2.62 |
| OTTHUMG00000150597 | 2.90 | 3.68 | 2.47 |
| OR10J1             | 2.90 | 3.59 | 2.55 |
| FAM19A1            | 2.90 | 3.37 | 2.37 |
| OTTHUMG00000160486 | 2.90 | 3.29 | 2.56 |
| P2RY10             | 2.90 | 3.29 | 2.61 |
| OTTHUMG00000153650 | 2.90 | 3.28 | 2.52 |
| LOC100293704       | 2.90 | 3.22 | 2.65 |
| OTTHUMG00000008362 | 2.90 | 3.37 | 2.51 |
| OTTHUMG00000147348 | 2.90 | 3.55 | 2.37 |
| TRIM51HP           | 2.90 | 3.67 | 2.43 |
| OTTHUMG00000010834 | 2.90 | 3.44 | 2.45 |
| MIR490             | 2.90 | 3.24 | 2.61 |
| OTTHUMG00000020140 | 2.90 | 3.39 | 2.17 |
| LOC441461          | 2.90 | 3.57 | 2.47 |
| LINC00930          | 2.90 | 3.69 | 2.58 |
| RET                | 2.90 | 3.42 | 2.55 |
| CCDC150            | 2.90 | 3.14 | 2.74 |
| C7orf62            | 2.90 | 3.61 | 2.44 |
| SPRR1B             | 2.89 | 3.48 | 2.13 |
| SLC10A4            | 2.89 | 3.14 | 2.52 |
| OTTHUMG00000171593 | 2.89 | 3.30 | 2.62 |
| SPINK13            | 2.89 | 3.25 | 2.49 |
| PRODH              | 2.89 | 3.23 | 2.68 |
| PCDHB1             | 2.89 | 3.34 | 2.41 |
| C9orf135           | 2.89 | 3.51 | 2.42 |
| HPGD               | 2.89 | 3.61 | 2.40 |
| CXorf22            | 2.89 | 3.13 | 2.38 |
| OTTHUMG00000160645 | 2.89 | 3.54 | 2.42 |
| AREGB              | 2.89 | 3.16 | 2.55 |
| OTTHUMG00000170069 | 2.89 | 3.17 | 2.51 |
| MIR4678            | 2.89 | 4.46 | 2.13 |
| MGAM               | 2.89 | 3.46 | 2.27 |
| OTTHUMG00000165532 | 2.89 | 3.62 | 2.50 |
| OTTHUMG00000161848 | 2.89 | 3.40 | 2.11 |



|                    |      |      |      |
|--------------------|------|------|------|
| MIR938             | 2.89 | 3.68 | 2.11 |
| TMPRSS11A          | 2.89 | 3.16 | 2.53 |
| SPO11              | 2.89 | 3.16 | 2.39 |
| PLK4               | 2.89 | 3.31 | 2.49 |
| MS4A2              | 2.89 | 3.35 | 2.52 |
| MIR141             | 2.89 | 3.30 | 2.53 |
| OTTHUMG00000173096 | 2.89 | 3.51 | 2.44 |
| RNA5SP247          | 2.89 | 4.41 | 2.11 |
| TMEM232            | 2.89 | 3.17 | 2.38 |
| OTTHUMG00000164715 | 2.89 | 3.31 | 2.42 |
| MIR548E            | 2.89 | 3.45 | 2.22 |
| AKR1D1             | 2.89 | 3.28 | 2.59 |
| RNY3P2             | 2.89 | 3.77 | 2.33 |
| CLEC12B            | 2.89 | 3.45 | 2.67 |
| OTTHUMG00000151379 | 2.89 | 3.32 | 2.48 |
| PROX1-IT1          | 2.88 | 3.34 | 2.59 |
| OTTHUMG00000170491 | 2.88 | 3.51 | 2.46 |
| UGT3A2             | 2.88 | 3.09 | 2.72 |
| FFAR2              | 2.88 | 3.29 | 2.59 |
| OTTHUMG00000152389 | 2.88 | 3.47 | 2.50 |
| THEG5              | 2.88 | 3.18 | 2.42 |
| LOC154872          | 2.88 | 3.29 | 2.48 |
| MIR550B2           | 2.88 | 3.42 | 2.25 |
| MMP26              | 2.88 | 3.32 | 2.39 |
| PXT1               | 2.88 | 3.38 | 2.49 |
| FGF12-AS1          | 2.88 | 3.46 | 2.22 |
| DSCAM-IT1          | 2.88 | 3.30 | 2.67 |
| OTTHUMG00000163854 | 2.88 | 3.68 | 2.34 |
| OTTHUMG00000160725 | 2.88 | 3.09 | 2.65 |
| AP1S3              | 2.88 | 3.31 | 2.42 |
| OTTHUMG00000183122 | 2.88 | 3.50 | 2.53 |
| TAS2R50            | 2.88 | 3.68 | 2.43 |
| OTTHUMG00000158448 | 2.88 | 3.44 | 2.60 |
| OTTHUMG00000163870 | 2.88 | 3.36 | 2.58 |
| LOC100506731       | 2.88 | 3.19 | 2.35 |
| OTTHUMG00000175929 | 2.88 | 3.64 | 2.36 |
| ARSF               | 2.88 | 3.20 | 2.66 |
| LINC00664          | 2.88 | 3.16 | 2.64 |
| TMPRSS11F          | 2.88 | 3.30 | 2.53 |
| TTC30B             | 2.88 | 3.50 | 2.33 |
| C18orf63           | 2.88 | 3.26 | 2.71 |
| CHRNA3             | 2.88 | 3.36 | 2.17 |
| ACTC1              | 2.88 | 3.41 | 2.43 |
| GALNTL5            | 2.88 | 3.19 | 2.60 |
| OTTHUMG00000161238 | 2.88 | 3.15 | 2.55 |
| LINC00935          | 2.88 | 3.13 | 2.65 |
| KRTAP4-8           | 2.88 | 3.66 | 2.30 |
| OTTHUMG00000019968 | 2.88 | 3.34 | 2.32 |
| ZNF799             | 2.88 | 3.29 | 2.03 |

|                    |      |      |      |
|--------------------|------|------|------|
| LINC00578          | 2.88 | 3.15 | 2.59 |
| MIR199B            | 2.87 | 3.17 | 2.46 |
| OTTHUMG00000151805 | 2.87 | 3.27 | 2.59 |
| OTTHUMG00000168098 | 2.87 | 3.18 | 2.63 |
| OR5AK2             | 2.87 | 3.20 | 2.60 |
| DSG4               | 2.87 | 3.41 | 2.58 |
| OTTHUMG00000169214 | 2.87 | 3.80 | 2.42 |
| LOC647323          | 2.87 | 3.39 | 2.57 |
| LOC400655          | 2.87 | 3.27 | 2.64 |
| ARL5B-AS1          | 2.87 | 3.45 | 2.56 |
| HES5               | 2.87 | 3.29 | 2.63 |
| PPM1E              | 2.87 | 3.49 | 2.48 |
| SLC9B1             | 2.87 | 3.23 | 2.38 |
| OTTHUMG00000019643 | 2.87 | 3.16 | 2.47 |
| MIR301B            | 2.87 | 3.28 | 2.25 |
| OTTHUMG00000153820 | 2.87 | 3.43 | 2.50 |
| SNORD125           | 2.87 | 3.37 | 2.47 |
| OTTHUMG00000153025 | 2.87 | 3.18 | 2.58 |
| RBM24              | 2.87 | 3.23 | 2.57 |
| OTTHUMG00000150054 | 2.87 | 3.04 | 2.49 |
| HNRNPA3P1          | 2.87 | 3.22 | 2.63 |
| RACGAP1P           | 2.87 | 3.05 | 2.70 |
| PLSCR2             | 2.87 | 3.37 | 2.43 |
| OTTHUMG00000163519 | 2.87 | 3.47 | 2.23 |
| OTTHUMG00000159649 | 2.87 | 3.02 | 2.70 |
| PPP1R36            | 2.87 | 3.06 | 2.61 |
| VWA8-AS1           | 2.87 | 3.31 | 2.61 |
| LOC392232          | 2.86 | 3.31 | 2.51 |
| MAGEA6             | 2.86 | 3.27 | 2.30 |
| MS4A5              | 2.86 | 3.42 | 2.47 |
| RNA5SP235          | 2.86 | 3.67 | 2.24 |
| OTTHUMG00000152841 | 2.86 | 3.35 | 2.28 |
| FLJ32955           | 2.86 | 3.14 | 2.59 |
| OTTHUMG00000009217 | 2.86 | 3.22 | 2.67 |
| OTTHUMG00000153099 | 2.86 | 3.78 | 2.28 |
| TRAV18             | 2.86 | 3.57 | 2.37 |
| OTTHUMG00000153424 | 2.86 | 3.35 | 2.46 |
| OTTHUMG00000009304 | 2.86 | 3.51 | 2.27 |
| OR6C68             | 2.86 | 3.26 | 2.34 |
| SNORD114-18        | 2.86 | 4.11 | 2.15 |
| SNORD9             | 2.86 | 3.76 | 1.81 |
| C5orf58            | 2.86 | 3.28 | 2.55 |
| STAC               | 2.86 | 3.27 | 2.35 |
| GABRA6             | 2.86 | 3.27 | 2.48 |
| OTTHUMG00000162673 | 2.86 | 3.46 | 2.28 |
| OTTHUMG00000162701 | 2.86 | 3.57 | 2.36 |
| EGFLAM-AS3         | 2.86 | 3.34 | 2.61 |
| HIST1H2BN          | 2.86 | 3.61 | 2.44 |
| TBPL2              | 2.86 | 3.50 | 2.61 |

|                    |      |      |      |
|--------------------|------|------|------|
| ARMC3              | 2.86 | 3.14 | 2.57 |
| LOC285423          | 2.86 | 3.13 | 2.74 |
| OTTHUMG00000159412 | 2.86 | 3.20 | 2.48 |
| LRRC19             | 2.86 | 3.33 | 2.47 |
| OTTHUMG00000153144 | 2.86 | 3.23 | 2.48 |
| OTTHUMG00000153665 | 2.86 | 3.19 | 2.50 |
| LOC340017          | 2.86 | 3.64 | 2.53 |
| AMELY              | 2.86 | 3.44 | 2.40 |
| PACRG-AS1          | 2.86 | 3.09 | 2.21 |
| OTTHUMG00000032515 | 2.86 | 3.45 | 2.39 |
| MIR4797            | 2.86 | 3.46 | 2.18 |
| RNA5SP188          | 2.85 | 3.78 | 1.88 |
| MIR216A            | 2.85 | 3.39 | 2.41 |
| KRT27              | 2.85 | 3.55 | 2.44 |
| MIR3186            | 2.85 | 3.39 | 2.47 |
| ZNF728             | 2.85 | 3.48 | 2.46 |
| PRAMEF11           | 2.85 | 3.86 | 2.23 |
| OR1N2              | 2.85 | 3.35 | 2.50 |
| MIR3122            | 2.85 | 3.23 | 2.38 |
| OTTHUMG00000171308 | 2.85 | 3.38 | 2.37 |
| ITK                | 2.85 | 3.37 | 2.39 |
| OTTHUMG00000154935 | 2.85 | 3.20 | 2.55 |
| BMPR1B             | 2.85 | 3.61 | 2.21 |
| OR3A2              | 2.85 | 3.35 | 2.24 |
| HSPB3              | 2.85 | 3.23 | 2.52 |
| GATSL2             | 2.85 | 3.44 | 2.22 |
| BSN-AS2            | 2.85 | 3.30 | 2.53 |
| MIR520G            | 2.85 | 3.25 | 2.33 |
| MIR17HG            | 2.85 | 3.14 | 2.46 |
| OTTHUMG00000159626 | 2.85 | 3.11 | 2.50 |
| OTTHUMG00000153425 | 2.85 | 3.53 | 2.18 |
| ANKRD34B           | 2.85 | 3.02 | 2.43 |
| SUN3               | 2.85 | 3.28 | 2.53 |
| LOC644248          | 2.85 | 3.55 | 2.42 |
| LPPR1              | 2.85 | 3.11 | 2.35 |
| OTTHUMG00000163613 | 2.84 | 3.31 | 2.48 |
| SLC9C1             | 2.84 | 3.15 | 2.58 |
| IL4                | 2.84 | 3.51 | 2.28 |
| TRAV34             | 2.84 | 3.38 | 2.37 |
| MYO3A              | 2.84 | 3.35 | 2.35 |
| OTTHUMG00000163174 | 2.84 | 3.24 | 2.43 |
| LOC100507391       | 2.84 | 3.47 | 2.53 |
| OTTHUMG00000163987 | 2.84 | 3.38 | 2.45 |
| MIR3116-1          | 2.84 | 3.92 | 2.15 |
| MIR508             | 2.84 | 3.33 | 2.54 |
| CALR3              | 2.84 | 3.32 | 2.52 |
| OTTHUMG00000074543 | 2.84 | 3.24 | 2.37 |
| DYDC2              | 2.84 | 3.10 | 2.61 |
| MIR4501            | 2.84 | 3.72 | 2.21 |

|                    |      |      |      |
|--------------------|------|------|------|
| RN7SKP2            | 2.84 | 3.39 | 2.32 |
| OTTHUMG00000165348 | 2.84 | 3.82 | 2.51 |
| VTRNA1-1           | 2.84 | 3.56 | 2.37 |
| OTTHUMG00000031862 | 2.84 | 3.34 | 2.49 |
| OTTHUMG00000064344 | 2.84 | 3.39 | 2.51 |
| RNA5SP270          | 2.84 | 3.42 | 2.44 |
| LINC00669          | 2.84 | 3.32 | 2.44 |
| MAGEB10            | 2.84 | 3.64 | 2.39 |
| OTTHUMG00000162463 | 2.84 | 3.06 | 2.65 |
| OTTHUMG00000163580 | 2.84 | 3.72 | 2.32 |
| SEMG2              | 2.84 | 3.73 | 2.43 |
| KRT19P1            | 2.84 | 3.56 | 2.15 |
| SAMSN1-AS1         | 2.84 | 3.06 | 2.58 |
| OR5T1              | 2.84 | 3.06 | 2.59 |
| LOC339622          | 2.84 | 3.55 | 2.38 |
| TMEFF2             | 2.84 | 3.18 | 2.51 |
| OR6C2              | 2.84 | 3.66 | 2.45 |
| OTTHUMG00000151319 | 2.84 | 3.19 | 2.33 |
| RNU6-78P           | 2.84 | 3.35 | 2.06 |
| TRAT1              | 2.84 | 3.56 | 2.43 |
| LINC00968          | 2.84 | 3.44 | 2.13 |
| LOC100287082       | 2.84 | 3.40 | 2.58 |
| RNA5SP56           | 2.84 | 4.24 | 1.98 |
| LOC646813          | 2.84 | 3.70 | 2.35 |
| OTTHUMG00000170592 | 2.84 | 3.26 | 2.52 |
| SPATA4             | 2.84 | 3.10 | 2.52 |
| MIR374A            | 2.84 | 4.09 | 2.09 |
| OTTHUMG00000140117 | 2.84 | 3.05 | 2.67 |
| OTTHUMG00000164047 | 2.83 | 3.06 | 2.43 |
| RNA5SP347          | 2.83 | 3.59 | 2.19 |
| RNU6ATAC3P         | 2.83 | 3.49 | 1.94 |
| LOC100132272       | 2.83 | 3.21 | 2.40 |
| FAM86FP            | 2.83 | 3.09 | 2.58 |
| ACE2               | 2.83 | 3.19 | 2.52 |
| C8orf22            | 2.83 | 3.27 | 2.40 |
| LOC729083          | 2.83 | 3.31 | 2.53 |
| LINC00261          | 2.83 | 3.39 | 2.48 |
| OTTHUMG00000172372 | 2.83 | 3.30 | 2.19 |
| LOC643770          | 2.83 | 3.13 | 2.67 |
| LOC100507387       | 2.83 | 3.15 | 2.26 |
| HRG                | 2.83 | 3.47 | 2.28 |
| TRAJ21             | 2.83 | 4.06 | 2.22 |
| OTTHUMG00000017135 | 2.83 | 3.73 | 2.17 |
| GSTTP2             | 2.83 | 3.56 | 2.40 |
| PABPC5-AS1         | 2.83 | 3.22 | 2.44 |
| RNA5SP496          | 2.83 | 3.60 | 1.91 |
| ZPBP               | 2.83 | 3.19 | 2.58 |
| NCRNA00185         | 2.83 | 3.92 | 1.68 |
| OTTHUMG00000183414 | 2.83 | 3.55 | 2.20 |

|                    |      |      |      |
|--------------------|------|------|------|
| TAS2R1             | 2.83 | 3.10 | 2.49 |
| LINC00923          | 2.83 | 3.40 | 2.53 |
| OTTHUMG00000154343 | 2.83 | 3.50 | 2.36 |
| OTTHUMG00000020560 | 2.83 | 3.15 | 2.41 |
| LOC100507657       | 2.83 | 3.71 | 2.39 |
| OTTHUMG00000032150 | 2.83 | 3.38 | 2.35 |
| SCARNA23           | 2.83 | 3.81 | 2.21 |
| LOC100289533       | 2.83 | 3.25 | 2.38 |
| MIR3129            | 2.83 | 3.38 | 2.31 |
| LOC284661          | 2.82 | 3.19 | 2.46 |
| OTTHUMG00000163836 | 2.82 | 3.09 | 2.34 |
| RNA5SP510          | 2.82 | 3.49 | 1.99 |
| OTTHUMG00000156569 | 2.82 | 3.40 | 2.30 |
| ANKRD30BP3         | 2.82 | 3.69 | 2.35 |
| CLEC4M             | 2.82 | 3.18 | 2.41 |
| OR56A4             | 2.82 | 3.63 | 2.47 |
| GPR50-AS1          | 2.82 | 3.21 | 2.52 |
| OTTHUMG00000020459 | 2.82 | 3.27 | 2.51 |
| SLCO6A1            | 2.82 | 3.04 | 2.61 |
| LOC101060226       | 2.82 | 3.52 | 2.30 |
| OTTHUMG00000039859 | 2.82 | 3.40 | 2.42 |
| RNA5SP390          | 2.82 | 3.48 | 2.17 |
| C6orf118           | 2.82 | 3.22 | 2.50 |
| SMIM18             | 2.82 | 3.32 | 2.48 |
| OTTHUMG00000171627 | 2.82 | 3.40 | 2.26 |
| CLYBL-IT1          | 2.82 | 3.59 | 2.42 |
| METTL11B           | 2.82 | 3.10 | 2.44 |
| TPTE2P3            | 2.82 | 3.40 | 2.57 |
| OTTHUMG00000162404 | 2.82 | 3.20 | 2.44 |
| MIR4776-1          | 2.82 | 3.30 | 2.19 |
| LINC00327          | 2.82 | 3.10 | 2.56 |
| MIR20B             | 2.82 | 3.76 | 1.88 |
| RNA5SP143          | 2.82 | 4.14 | 1.81 |
| STXBP5L            | 2.82 | 3.11 | 2.47 |
| FAM47C             | 2.82 | 3.60 | 2.37 |
| MIR3974            | 2.82 | 4.13 | 2.26 |
| OTTHUMG00000170739 | 2.82 | 3.15 | 2.58 |
| VN1R10P            | 2.82 | 3.74 | 2.32 |
| OTTHUMG00000170397 | 2.81 | 3.17 | 2.60 |
| LINC00687          | 2.81 | 3.25 | 2.42 |
| OTTHUMG00000037977 | 2.81 | 3.48 | 2.27 |
| SNORD116-29        | 2.81 | 3.51 | 2.13 |
| IGHV3-72           | 2.81 | 3.58 | 2.09 |
| OTTHUMG00000177076 | 2.81 | 3.56 | 2.39 |
| CSHL1              | 2.81 | 3.28 | 2.30 |
| CDKN2B-AS1         | 2.81 | 3.21 | 2.36 |
| RNA5SP96           | 2.81 | 3.81 | 2.50 |
| FAM182A            | 2.81 | 3.50 | 2.35 |
| HECW1-IT1          | 2.81 | 3.32 | 2.46 |

|                    |      |      |      |
|--------------------|------|------|------|
| OR2Y1              | 2.81 | 3.13 | 2.51 |
| TRBV5-3            | 2.81 | 3.71 | 2.23 |
| OTTHUMG00000160686 | 2.81 | 3.45 | 2.29 |
| KLHL38             | 2.81 | 3.39 | 2.38 |
| OR5D18             | 2.81 | 3.02 | 2.49 |
| OTTHUMG00000166476 | 2.81 | 3.06 | 2.37 |
| OTTHUMG00000179488 | 2.81 | 3.27 | 2.46 |
| CLCA4              | 2.81 | 3.16 | 2.29 |
| BNC1               | 2.81 | 3.22 | 2.39 |
| OR4B1              | 2.81 | 3.29 | 2.23 |
| MIR4511            | 2.81 | 4.32 | 2.10 |
| OTTHUMG00000017601 | 2.81 | 3.57 | 2.09 |
| SNORD116-11        | 2.81 | 4.10 | 1.68 |
| OTTHUMG00000166075 | 2.81 | 3.37 | 2.19 |
| OR52N1             | 2.81 | 3.23 | 2.36 |
| KRTAP21-2          | 2.81 | 3.14 | 2.54 |
| LECT2              | 2.81 | 3.39 | 2.51 |
| FGL1               | 2.81 | 3.34 | 2.24 |
| OTTHUMG00000164158 | 2.81 | 3.27 | 2.35 |
| OTTHUMG00000008933 | 2.80 | 3.13 | 2.20 |
| MIR874             | 2.80 | 3.27 | 2.16 |
| PTCHD3             | 2.80 | 3.16 | 2.43 |
| BMX                | 2.80 | 3.11 | 2.44 |
| OTTHUMG00000000405 | 2.80 | 3.30 | 2.45 |
| OTTHUMG00000171800 | 2.80 | 3.22 | 2.29 |
| OTTHUMG00000153783 | 2.80 | 3.60 | 2.40 |
| NBPF10             | 2.80 | 3.70 | 2.28 |
| ATP2B3             | 2.80 | 3.41 | 2.48 |
| TTY3               | 2.80 | 3.29 | 2.29 |
| RNA5SP24           | 2.80 | 3.16 | 2.44 |
| PCDH9-AS4          | 2.80 | 3.50 | 2.25 |
| EGFLAM-AS2         | 2.80 | 3.80 | 2.07 |
| OR52D1             | 2.80 | 3.88 | 2.37 |
| RAG1               | 2.80 | 3.34 | 2.47 |
| C1orf168           | 2.80 | 3.52 | 2.21 |
| SNORD18A           | 2.80 | 3.32 | 2.02 |
| OTTHUMG00000155424 | 2.80 | 3.20 | 2.37 |
| MIR448             | 2.80 | 3.11 | 2.54 |
| MIR1193            | 2.80 | 3.53 | 2.25 |
| OTTHUMG00000133752 | 2.80 | 3.87 | 1.97 |
| TCTEX1D1           | 2.80 | 3.32 | 2.32 |
| LINC00588          | 2.80 | 3.25 | 2.28 |
| AA06               | 2.80 | 3.10 | 2.15 |
| PCP4               | 2.80 | 3.01 | 2.59 |
| OTTHUMG00000183978 | 2.80 | 3.13 | 2.57 |
| CCNA1              | 2.80 | 3.21 | 2.40 |
| OTTHUMG00000163257 | 2.79 | 3.19 | 2.48 |
| RNU6-68P           | 2.79 | 3.28 | 2.33 |
| OR5AK4P            | 2.79 | 3.27 | 2.49 |

|                    |      |      |      |
|--------------------|------|------|------|
| CCR3               | 2.79 | 3.44 | 2.52 |
| GLRA3              | 2.79 | 3.69 | 2.31 |
| TMEM212            | 2.79 | 3.17 | 2.48 |
| OTTHUMG00000160614 | 2.79 | 3.40 | 2.27 |
| OTTHUMG00000159743 | 2.79 | 3.32 | 2.41 |
| OTTHUMG00000013089 | 2.79 | 3.60 | 1.51 |
| NBEAP1             | 2.79 | 3.78 | 2.18 |
| C11orf42           | 2.79 | 3.33 | 2.21 |
| H2BFWT             | 2.79 | 3.47 | 2.44 |
| OTTHUMG00000065060 | 2.79 | 3.36 | 2.07 |
| TAAR6              | 2.79 | 3.30 | 2.52 |
| MIR2116            | 2.79 | 3.60 | 2.14 |
| KRT28              | 2.79 | 3.05 | 2.55 |
| C3orf79            | 2.79 | 3.25 | 2.36 |
| OTTHUMG00000042020 | 2.79 | 3.76 | 2.42 |
| OTTHUMG00000020437 | 2.79 | 3.51 | 2.43 |
| ASB17              | 2.79 | 3.26 | 2.25 |
| OTTHUMG00000159132 | 2.79 | 3.27 | 2.27 |
| SIGLEC17P          | 2.79 | 3.48 | 1.98 |
| OTTHUMG00000172322 | 2.79 | 3.15 | 2.40 |
| MTFR2              | 2.79 | 3.09 | 2.49 |
| TRAJ14             | 2.79 | 3.86 | 2.16 |
| LUZP2              | 2.79 | 3.05 | 2.56 |
| OTTHUMG00000153530 | 2.79 | 3.12 | 2.56 |
| C12orf40           | 2.79 | 3.07 | 2.35 |
| OTTHUMG00000168914 | 2.79 | 3.43 | 2.21 |
| OTTHUMG00000164915 | 2.79 | 4.10 | 2.28 |
| MIR3156-3          | 2.79 | 3.02 | 2.56 |
| OTTHUMG00000149338 | 2.79 | 2.94 | 2.62 |
| LOC100128668       | 2.79 | 3.61 | 2.05 |
| RNA5SP107          | 2.78 | 3.31 | 2.42 |
| CRYGB              | 2.78 | 3.59 | 2.28 |
| MIR3156-2          | 2.78 | 3.12 | 2.55 |
| ERICH2             | 2.78 | 3.34 | 2.40 |
| OTTHUMG00000162918 | 2.78 | 3.34 | 2.26 |
| OTTHUMG00000003519 | 2.78 | 3.23 | 2.30 |
| OTTHUMG00000155286 | 2.78 | 3.50 | 2.34 |
| MIR590             | 2.78 | 3.83 | 2.21 |
| KC6                | 2.78 | 3.60 | 2.29 |
| MUC13              | 2.78 | 3.38 | 2.50 |
| CLDN8              | 2.78 | 3.13 | 2.42 |
| OTTHUMG00000154544 | 2.78 | 3.07 | 2.41 |
| OTTHUMG00000058813 | 2.78 | 3.37 | 2.15 |
| LOC286058          | 2.78 | 3.19 | 2.36 |
| OTTHUMG00000151787 | 2.78 | 3.41 | 2.09 |
| MIR506             | 2.78 | 3.46 | 1.74 |
| LOC100506348       | 2.78 | 3.59 | 2.25 |
| SERPINB12          | 2.78 | 3.37 | 2.30 |
| LOC144017          | 2.78 | 3.05 | 2.29 |

|                    |      |      |      |
|--------------------|------|------|------|
| HSP90B3P           | 2.78 | 4.26 | 1.99 |
| MIR29A             | 2.78 | 3.64 | 2.33 |
| OTTHUMG00000165095 | 2.78 | 3.35 | 2.33 |
| LINC00293          | 2.78 | 3.21 | 2.39 |
| TAS2R20            | 2.78 | 3.64 | 2.12 |
| MIR520H            | 2.78 | 3.47 | 2.42 |
| OR4F15             | 2.78 | 3.20 | 2.20 |
| TEX26              | 2.78 | 3.06 | 2.46 |
| OTTHUMG00000179714 | 2.78 | 3.07 | 2.37 |
| MIR495             | 2.78 | 3.38 | 2.18 |
| OTTHUMG00000154036 | 2.78 | 2.98 | 2.37 |
| LINC00491          | 2.77 | 3.02 | 2.45 |
| OTTHUMG00000008050 | 2.77 | 3.29 | 2.27 |
| OTTHUMG00000164613 | 2.77 | 3.14 | 2.13 |
| OTTHUMG00000014223 | 2.77 | 3.49 | 2.23 |
| OTTHUMG00000168235 | 2.77 | 4.02 | 1.84 |
| C15orf43           | 2.77 | 3.25 | 2.50 |
| ART3               | 2.77 | 3.22 | 2.44 |
| OTTHUMG00000169997 | 2.77 | 3.22 | 2.23 |
| OTTHUMG00000165844 | 2.77 | 3.37 | 2.31 |
| MIR544B            | 2.77 | 3.83 | 1.78 |
| OTTHUMG00000020777 | 2.77 | 3.13 | 2.26 |
| OTTHUMG00000154827 | 2.77 | 3.08 | 2.32 |
| ATP6V1G3           | 2.77 | 3.16 | 2.30 |
| OTTHUMG00000155483 | 2.77 | 3.11 | 2.54 |
| OTTHUMG00000162359 | 2.77 | 3.11 | 2.56 |
| MTRNR2L7           | 2.77 | 3.10 | 2.29 |
| MIR4744            | 2.77 | 3.84 | 2.16 |
| TRAV39             | 2.77 | 3.44 | 2.22 |
| DPRX               | 2.77 | 3.21 | 2.22 |
| ARSE               | 2.77 | 3.06 | 2.39 |
| OTTHUMG00000153548 | 2.77 | 2.89 | 2.50 |
| OTTHUMG00000158300 | 2.77 | 3.26 | 2.41 |
| SNORD127           | 2.77 | 3.56 | 2.07 |
| PRAMEF12           | 2.77 | 3.23 | 2.26 |
| OTTHUMG00000021409 | 2.77 | 3.24 | 2.50 |
| OR10W1             | 2.77 | 3.28 | 2.21 |
| OTTHUMG00000019446 | 2.76 | 3.42 | 2.20 |
| IGHV3-49           | 2.76 | 3.31 | 2.04 |
| OR5H6              | 2.76 | 3.37 | 2.36 |
| C3orf33            | 2.76 | 3.04 | 2.34 |
| OTTHUMG00000151898 | 2.76 | 3.28 | 2.28 |
| TCTE3              | 2.76 | 3.34 | 2.22 |
| LOC100132501       | 2.76 | 3.27 | 2.45 |
| OTTHUMG00000009148 | 2.76 | 3.08 | 2.35 |
| SLC17A3            | 2.76 | 3.13 | 2.44 |
| MIR3136            | 2.76 | 3.36 | 2.40 |
| OTTHUMG00000162331 | 2.76 | 3.24 | 2.44 |
| SPRR2D             | 2.76 | 3.13 | 2.16 |



|                    |      |      |      |
|--------------------|------|------|------|
| OR1L4              | 2.76 | 3.78 | 2.11 |
| C6orf10            | 2.76 | 3.37 | 2.15 |
| OTTHUMG00000059209 | 2.76 | 3.34 | 2.33 |
| RNA5SP104          | 2.76 | 4.21 | 2.19 |
| ALX1               | 2.76 | 3.31 | 2.46 |
| FAM194A            | 2.76 | 3.09 | 2.49 |
| OTTHUMG00000161641 | 2.76 | 3.19 | 2.30 |
| OTTHUMG00000158577 | 2.76 | 3.40 | 2.26 |
| SCGB1D4            | 2.75 | 3.37 | 2.44 |
| LINC00698          | 2.75 | 3.27 | 2.09 |
| CDC14C             | 2.75 | 3.36 | 2.33 |
| SLC5A8             | 2.75 | 3.04 | 2.50 |
| PLCH1-AS2          | 2.75 | 3.04 | 2.39 |
| OTTHUMG00000156017 | 2.75 | 3.19 | 2.43 |
| SLC7A13            | 2.75 | 3.08 | 2.39 |
| PTPRQ              | 2.75 | 3.21 | 2.50 |
| LINC00865          | 2.75 | 3.17 | 2.41 |
| LYZL1              | 2.75 | 3.70 | 2.18 |
| KLRD1              | 2.75 | 3.00 | 2.48 |
| NPSR1-AS1          | 2.75 | 3.23 | 2.36 |
| OTTHUMG00000163288 | 2.75 | 3.26 | 1.98 |
| KRTAP20-1          | 2.75 | 3.19 | 2.31 |
| ZSWIM2             | 2.75 | 3.01 | 2.43 |
| NTS                | 2.75 | 3.59 | 2.40 |
| DCLK3              | 2.75 | 3.12 | 2.36 |
| HIST1H2BG          | 2.75 | 3.29 | 2.33 |
| OTTHUMG00000074159 | 2.75 | 3.11 | 2.15 |
| OTTHUMG00000017965 | 2.75 | 3.42 | 2.19 |
| LOC100129186       | 2.75 | 3.72 | 2.36 |
| OTTHUMG00000153098 | 2.75 | 3.07 | 2.24 |
| OTTHUMG00000164759 | 2.75 | 3.13 | 2.46 |
| IFLTD1             | 2.75 | 3.16 | 2.29 |
| TTY19              | 2.74 | 3.10 | 2.43 |
| HIST1H2BA          | 2.74 | 3.38 | 1.95 |
| VIPR1-AS1          | 2.74 | 3.79 | 2.15 |
| OTTHUMG00000154852 | 2.74 | 3.12 | 2.47 |
| OTTHUMG00000158383 | 2.74 | 3.12 | 2.29 |
| GABRG1             | 2.74 | 3.30 | 2.38 |
| OTTHUMG00000161601 | 2.74 | 3.03 | 2.38 |
| FOXD3              | 2.74 | 3.26 | 2.28 |
| OTTHUMG00000172035 | 2.74 | 3.15 | 2.40 |
| OTTHUMG00000158948 | 2.74 | 3.14 | 2.55 |
| RNA5SP245          | 2.74 | 4.34 | 1.82 |
| MIR4765            | 2.74 | 3.42 | 2.34 |
| LINC00302          | 2.74 | 3.60 | 2.18 |
| MIR767             | 2.74 | 3.20 | 2.38 |
| KCNB2              | 2.74 | 3.11 | 2.39 |
| LOC284294          | 2.74 | 3.19 | 2.24 |
| PRMT5-AS1          | 2.74 | 3.02 | 2.38 |

|                    |      |      |      |
|--------------------|------|------|------|
| MED27              | 2.74 | 3.76 | 2.10 |
| MIR516A1           | 2.74 | 3.89 | 2.01 |
| CST9LP1            | 2.74 | 3.24 | 2.29 |
| SLC27A6            | 2.74 | 3.12 | 2.46 |
| OR2C3              | 2.74 | 3.40 | 2.16 |
| ATP5EP2            | 2.74 | 2.99 | 2.41 |
| LINC00709          | 2.74 | 3.53 | 2.26 |
| CLECL1             | 2.74 | 3.24 | 2.36 |
| TRAV8-2            | 2.74 | 3.27 | 2.11 |
| OTTHUMG00000164295 | 2.74 | 3.10 | 2.39 |
| KCNH8              | 2.74 | 2.95 | 2.47 |
| CNTNAP4            | 2.74 | 3.29 | 2.42 |
| TRPC4              | 2.74 | 3.11 | 2.30 |
| COX8C              | 2.74 | 3.24 | 2.46 |
| OTTHUMG00000166512 | 2.74 | 3.18 | 2.30 |
| OTTHUMG00000164525 | 2.74 | 3.26 | 2.41 |
| OTTHUMG00000161216 | 2.74 | 3.88 | 2.13 |
| S100A7L2           | 2.74 | 3.13 | 2.34 |
| OTTHUMG00000178685 | 2.73 | 3.22 | 2.24 |
| SNORD114-23        | 2.73 | 4.79 | 1.83 |
| TRAJ33             | 2.73 | 3.53 | 2.43 |
| SYNPR              | 2.73 | 3.10 | 2.50 |
| OR52B2             | 2.73 | 3.08 | 2.41 |
| OTTHUMG00000017201 | 2.73 | 3.02 | 2.53 |
| OR10AG1            | 2.73 | 3.08 | 2.44 |
| CYLC1              | 2.73 | 2.92 | 2.53 |
| OTTHUMG00000159748 | 2.73 | 3.00 | 2.46 |
| OTTHUMG00000078324 | 2.73 | 3.24 | 2.40 |
| LINC00571          | 2.73 | 3.19 | 2.10 |
| ROPN1              | 2.73 | 3.74 | 1.71 |
| CBLC               | 2.73 | 3.20 | 2.38 |
| OTTHUMG00000158360 | 2.73 | 3.05 | 2.35 |
| MIR3664            | 2.73 | 3.32 | 2.44 |
| C15orf54           | 2.73 | 3.40 | 2.24 |
| OTTHUMG00000154623 | 2.73 | 3.39 | 2.36 |
| MIR2355            | 2.73 | 3.71 | 2.13 |
| TRIM42             | 2.73 | 3.45 | 2.24 |
| TAAR9              | 2.73 | 3.07 | 2.31 |
| SNORD97            | 2.73 | 3.26 | 2.52 |
| GAGE1              | 2.73 | 3.13 | 2.06 |
| CXorf66            | 2.73 | 3.60 | 2.39 |
| ZFX-AS1            | 2.73 | 3.07 | 2.24 |
| MIR96              | 2.73 | 3.15 | 2.38 |
| LOC645949          | 2.73 | 3.49 | 2.01 |
| OTTHUMG00000162459 | 2.73 | 3.03 | 2.32 |
| OTTHUMG00000168552 | 2.73 | 3.27 | 2.22 |
| OTTHUMG00000010019 | 2.73 | 3.01 | 2.30 |
| CHRM5              | 2.73 | 3.08 | 2.13 |
| SNORD83A           | 2.73 | 3.12 | 2.23 |

|                     |      |      |      |
|---------------------|------|------|------|
| C11orf94            | 2.73 | 3.19 | 2.30 |
| OTTHUMG00000152740  | 2.73 | 3.32 | 2.39 |
| CRISP2              | 2.73 | 3.12 | 2.50 |
| OTTHUMG00000015393  | 2.72 | 3.15 | 2.19 |
| OTTHUMG000000160299 | 2.72 | 3.18 | 2.19 |
| SNORA2B             | 2.72 | 3.31 | 2.24 |
| CLEC4D              | 2.72 | 2.97 | 2.42 |
| OR2D3               | 2.72 | 3.11 | 2.42 |
| OTTHUMG000000074167 | 2.72 | 3.13 | 2.56 |
| LOC100996552        | 2.72 | 3.29 | 1.95 |
| MIR138-1            | 2.72 | 3.22 | 2.34 |
| FGF22               | 2.72 | 3.17 | 2.15 |
| TYRO3P              | 2.72 | 3.59 | 2.28 |
| DCT                 | 2.72 | 3.15 | 2.29 |
| OTTHUMG000000169867 | 2.72 | 3.20 | 2.14 |
| OTTHUMG000000156583 | 2.72 | 3.06 | 2.24 |
| PAR4                | 2.72 | 3.01 | 2.42 |
| OTTHUMG000000164463 | 2.72 | 3.30 | 2.40 |
| ACOT12              | 2.72 | 3.11 | 2.34 |
| HORMAD2             | 2.72 | 3.08 | 2.39 |
| RNA5SP373           | 2.72 | 3.96 | 1.95 |
| OTTHUMG000000161004 | 2.72 | 3.46 | 2.36 |
| CER1                | 2.71 | 3.13 | 2.42 |
| C2orf16             | 2.71 | 3.53 | 2.19 |
| OTTHUMG000000164208 | 2.71 | 3.35 | 2.23 |
| TRAJ1               | 2.71 | 3.73 | 1.92 |
| C10orf131           | 2.71 | 3.77 | 2.27 |
| LOC441009           | 2.71 | 3.33 | 2.23 |
| CCDC38              | 2.71 | 3.53 | 2.32 |
| IGHV3-43            | 2.71 | 3.68 | 1.70 |
| OTTHUMG000000162581 | 2.71 | 3.06 | 2.37 |
| OTTHUMG000000168375 | 2.71 | 2.89 | 2.30 |
| OTTHUMG00000019020  | 2.71 | 2.91 | 2.41 |
| CT64                | 2.71 | 2.90 | 2.47 |
| OTTHUMG000000163316 | 2.71 | 3.34 | 2.14 |
| LRIT3               | 2.71 | 3.26 | 2.43 |
| ORM1                | 2.71 | 3.04 | 2.40 |
| MAST4-IT1           | 2.71 | 3.40 | 2.20 |
| OTTHUMG000000153725 | 2.71 | 3.12 | 2.44 |
| ATG10-IT1           | 2.71 | 3.71 | 2.34 |
| OTTHUMG000000162804 | 2.71 | 3.30 | 2.19 |
| IL1RAPL1            | 2.71 | 2.94 | 2.48 |
| OTTHUMG000000157089 | 2.71 | 3.18 | 2.11 |
| LUZP4               | 2.71 | 3.17 | 2.22 |
| OTTHUMG000000156217 | 2.71 | 3.23 | 2.32 |
| SPERT               | 2.70 | 3.19 | 2.25 |
| MIR514A2            | 2.70 | 4.12 | 2.05 |
| LOC101060553        | 2.70 | 3.15 | 2.42 |
| OTTHUMG000000162824 | 2.70 | 3.12 | 2.22 |

|                    |      |      |      |
|--------------------|------|------|------|
| KRTAP13-2          | 2.70 | 3.12 | 2.27 |
| MIR190B            | 2.70 | 3.37 | 2.04 |
| OTTHUMG00000160657 | 2.70 | 2.99 | 2.34 |
| SPATA31A6          | 2.70 | 3.15 | 2.27 |
| LOC100507652       | 2.70 | 3.01 | 2.31 |
| OTTHUMG00000166329 | 2.70 | 3.14 | 2.33 |
| OTTHUMG00000169738 | 2.70 | 3.20 | 2.28 |
| SAMD12-AS1         | 2.70 | 3.00 | 2.43 |
| LOC100133616       | 2.70 | 3.63 | 2.33 |
| OTTHUMG00000012147 | 2.70 | 3.46 | 2.35 |
| OR4K2              | 2.70 | 3.77 | 2.15 |
| OTTHUMG00000033074 | 2.70 | 2.99 | 2.27 |
| KRTAP19-2          | 2.70 | 3.71 | 1.89 |
| KRTAP6-1           | 2.70 | 3.01 | 2.40 |
| LOC100133123       | 2.70 | 2.96 | 2.31 |
| MIR4500HG          | 2.70 | 3.11 | 2.14 |
| OTTHUMG00000177856 | 2.70 | 2.97 | 2.37 |
| PKIA               | 2.70 | 3.22 | 2.45 |
| MIR1471            | 2.70 | 3.45 | 2.19 |
| MIR4472-1          | 2.70 | 3.65 | 2.01 |
| OTTHUMG00000172228 | 2.70 | 3.09 | 2.32 |
| LOC100124692       | 2.69 | 3.12 | 2.28 |
| OTTHUMG00000169866 | 2.69 | 3.79 | 2.25 |
| ARL9               | 2.69 | 3.77 | 2.11 |
| OTTHUMG00000021932 | 2.69 | 3.50 | 2.10 |
| MIR519A1           | 2.69 | 4.42 | 1.85 |
| MIR125B1           | 2.69 | 3.34 | 1.84 |
| CNTN1              | 2.69 | 3.12 | 2.37 |
| CXCL6              | 2.69 | 3.03 | 2.47 |
| OTTHUMG00000160721 | 2.69 | 3.23 | 2.21 |
| RAB39A             | 2.69 | 3.07 | 2.24 |
| OTTHUMG00000024194 | 2.69 | 3.24 | 2.21 |
| MMP10              | 2.69 | 3.31 | 2.33 |
| OTTHUMG00000018255 | 2.69 | 3.34 | 2.49 |
| OTTHUMG00000169922 | 2.69 | 3.28 | 2.38 |
| CCSER1             | 2.69 | 2.99 | 2.31 |
| SAA3P              | 2.69 | 3.54 | 2.22 |
| SNORD114-20        | 2.69 | 4.87 | 1.48 |
| MIR337             | 2.69 | 3.03 | 2.36 |
| HRH4               | 2.69 | 3.06 | 2.24 |
| OTTHUMG00000031835 | 2.69 | 3.02 | 2.20 |
| OTTHUMG00000148688 | 2.69 | 3.20 | 2.34 |
| RNU6ATAC4P         | 2.69 | 3.38 | 1.94 |
| OTTHUMG00000158468 | 2.69 | 3.07 | 2.22 |
| OTTHUMG00000036359 | 2.69 | 3.10 | 2.20 |
| MIR126             | 2.69 | 4.20 | 2.22 |
| GRM7-AS2           | 2.69 | 3.10 | 2.26 |
| OTTHUMG00000015769 | 2.68 | 3.40 | 2.11 |
| LOC441455          | 2.68 | 3.28 | 2.15 |

|                    |      |      |      |
|--------------------|------|------|------|
| XAGE5              | 2.68 | 3.28 | 2.30 |
| LINC00676          | 2.68 | 3.22 | 2.23 |
| C4orf22            | 2.68 | 3.28 | 2.31 |
| MIR1-1             | 2.68 | 3.52 | 1.96 |
| OTTHUMG00000164634 | 2.68 | 3.39 | 1.83 |
| INSM2              | 2.68 | 3.29 | 2.39 |
| OTTHUMG00000032035 | 2.68 | 3.48 | 2.22 |
| OTTHUMG00000035042 | 2.68 | 4.23 | 2.15 |
| IAPP               | 2.68 | 3.24 | 2.29 |
| SNORA70F           | 2.68 | 3.49 | 2.12 |
| KERA               | 2.68 | 3.05 | 2.13 |
| ATP13A5-AS1        | 2.68 | 3.15 | 2.46 |
| OTTHUMG00000020564 | 2.68 | 3.66 | 2.00 |
| SNORA11C           | 2.68 | 3.85 | 1.64 |
| OTTHUMG00000167254 | 2.68 | 3.22 | 2.42 |
| STAP1              | 2.68 | 3.10 | 2.11 |
| MYO16-AS2          | 2.68 | 2.95 | 2.04 |
| LOC100130976       | 2.68 | 2.97 | 2.21 |
| LOC644919          | 2.68 | 3.12 | 2.40 |
| LIPK               | 2.68 | 3.29 | 2.25 |
| OTTHUMG00000172762 | 2.68 | 3.04 | 2.29 |
| OIP5               | 2.68 | 3.35 | 2.24 |
| FAM217A            | 2.68 | 3.08 | 2.27 |
| FSCB               | 2.68 | 2.95 | 2.28 |
| MIR4711            | 2.68 | 3.09 | 2.21 |
| OTTHUMG00000164044 | 2.67 | 3.27 | 2.35 |
| C17orf112          | 2.67 | 3.46 | 1.97 |
| CRISP1             | 2.67 | 3.06 | 2.39 |
| OR13C8             | 2.67 | 3.08 | 2.26 |
| GK2                | 2.67 | 3.02 | 2.35 |
| OTTHUMG00000164558 | 2.67 | 3.08 | 2.27 |
| BCHE               | 2.67 | 2.98 | 2.23 |
| ABCC6P2            | 2.67 | 3.15 | 2.29 |
| CPLX4              | 2.67 | 3.36 | 2.19 |
| ADGB               | 2.67 | 3.15 | 2.37 |
| RS1                | 2.67 | 3.08 | 2.30 |
| OR8I2              | 2.67 | 3.31 | 2.40 |
| TRGV1              | 2.67 | 3.25 | 2.06 |
| NUP210P1           | 2.67 | 2.97 | 2.19 |
| OTTHUMG00000172013 | 2.67 | 3.01 | 2.43 |
| ACSM2A             | 2.67 | 3.31 | 2.13 |
| OTTHUMG00000170736 | 2.67 | 2.99 | 2.36 |
| OR5M11             | 2.67 | 3.07 | 2.36 |
| SCGB2A1            | 2.67 | 3.50 | 2.07 |
| IL5                | 2.67 | 3.11 | 2.16 |
| OTTHUMG00000021246 | 2.67 | 2.84 | 2.26 |
| SAMD7              | 2.67 | 3.02 | 2.42 |
| LINC00332          | 2.67 | 2.93 | 2.35 |
| CCDC83             | 2.67 | 3.12 | 2.36 |

|                    |      |      |      |
|--------------------|------|------|------|
| IL22               | 2.67 | 3.26 | 2.03 |
| OTTHUMG00000182965 | 2.67 | 3.02 | 2.30 |
| POTEE              | 2.67 | 3.44 | 2.06 |
| OTTHUMG00000154946 | 2.66 | 3.10 | 2.38 |
| OTTHUMG00000035603 | 2.66 | 3.13 | 2.13 |
| OTTHUMG00000164855 | 2.66 | 3.37 | 2.22 |
| MIR489             | 2.66 | 3.42 | 2.30 |
| MAGEB5             | 2.66 | 3.06 | 2.19 |
| OTTHUMG00000173406 | 2.66 | 3.27 | 2.26 |
| OTTHUMG00000153045 | 2.66 | 3.31 | 2.31 |
| TRAJ25             | 2.66 | 3.42 | 2.16 |
| CSRP3              | 2.66 | 3.33 | 2.20 |
| OTTHUMG00000168237 | 2.66 | 3.37 | 2.09 |
| OTTHUMG00000176103 | 2.66 | 2.95 | 2.39 |
| OTTHUMG00000086701 | 2.66 | 3.33 | 1.84 |
| OTTHUMG00000015508 | 2.66 | 3.28 | 2.39 |
| OTTHUMG00000169664 | 2.66 | 2.92 | 2.24 |
| EIF2B5-IT1         | 2.66 | 2.96 | 2.30 |
| TRDN               | 2.66 | 2.98 | 2.43 |
| TM4SF20            | 2.66 | 3.29 | 2.30 |
| RNU2-3P            | 2.66 | 3.14 | 2.26 |
| ZNF890P            | 2.66 | 3.09 | 2.07 |
| LOC400706          | 2.66 | 3.50 | 2.06 |
| OTTHUMG00000019546 | 2.66 | 3.82 | 2.26 |
| LINC00919          | 2.66 | 3.10 | 2.15 |
| MIR1276            | 2.66 | 3.62 | 2.21 |
| RAD21L1            | 2.66 | 3.12 | 2.34 |
| OTTHUMG00000169352 | 2.66 | 3.23 | 2.27 |
| LSP1P3             | 2.66 | 3.26 | 2.03 |
| PKD2L2             | 2.66 | 2.99 | 2.44 |
| OTTHUMG00000162038 | 2.66 | 3.28 | 2.38 |
| ACTRT1             | 2.66 | 3.18 | 2.18 |
| OTTHUMG00000153574 | 2.66 | 3.70 | 1.81 |
| SNORD1B            | 2.66 | 3.20 | 1.77 |
| SAGE1              | 2.65 | 2.88 | 2.43 |
| OTTHUMG00000164254 | 2.65 | 3.20 | 2.13 |
| FBXL21             | 2.65 | 3.06 | 2.29 |
| OTTHUMG00000015069 | 2.65 | 3.38 | 2.21 |
| ZNF835             | 2.65 | 2.87 | 2.46 |
| CCDC160            | 2.65 | 3.04 | 2.20 |
| HTR2C              | 2.65 | 3.01 | 2.47 |
| OTTHUMG00000059445 | 2.65 | 2.96 | 2.36 |
| OTTHUMG00000171815 | 2.65 | 3.26 | 1.86 |
| NME8               | 2.65 | 3.09 | 2.28 |
| OTTHUMG00000037511 | 2.65 | 3.19 | 2.16 |
| MIR3074            | 2.65 | 3.14 | 2.19 |
| MIR517B            | 2.65 | 3.15 | 2.28 |
| OTTHUMG00000157006 | 2.65 | 3.08 | 2.23 |
| LOC643037          | 2.65 | 3.07 | 2.17 |

|                    |      |      |      |
|--------------------|------|------|------|
| OTTHUMG00000172532 | 2.65 | 4.21 | 2.03 |
| OTTHUMG00000178983 | 2.65 | 3.33 | 2.33 |
| OTTHUMG00000162504 | 2.65 | 3.20 | 2.15 |
| JAKMIP2            | 2.65 | 3.05 | 2.37 |
| OTTHUMG00000171854 | 2.65 | 3.01 | 2.25 |
| CRTAM              | 2.65 | 3.06 | 2.21 |
| MYH4               | 2.65 | 3.58 | 1.63 |
| TAS2R42            | 2.65 | 3.20 | 2.29 |
| LINC00706          | 2.65 | 3.03 | 2.25 |
| LINC00283          | 2.65 | 2.89 | 2.42 |
| OTTHUMG00000168810 | 2.65 | 3.38 | 2.21 |
| TMEM78             | 2.65 | 3.12 | 2.21 |
| LOC494141          | 2.65 | 3.20 | 2.17 |
| HUS1B              | 2.65 | 3.00 | 2.26 |
| OTTHUMG00000170475 | 2.65 | 2.90 | 2.46 |
| ANKRD22            | 2.65 | 3.03 | 2.22 |
| LOC100507306       | 2.65 | 3.22 | 1.96 |
| RNA5SP78           | 2.65 | 3.15 | 2.06 |
| SNORD12C           | 2.65 | 3.63 | 1.89 |
| PROX1-AS1          | 2.65 | 3.08 | 2.21 |
| OTTHUMG00000170567 | 2.65 | 3.28 | 2.16 |
| KRTAP4-9           | 2.64 | 3.06 | 2.18 |
| OTTHUMG00000171356 | 2.64 | 3.05 | 2.31 |
| C9orf92            | 2.64 | 3.21 | 2.34 |
| OTTHUMG00000160730 | 2.64 | 3.16 | 2.32 |
| OFCC1              | 2.64 | 3.09 | 2.29 |
| LHX5               | 2.64 | 3.15 | 2.26 |
| OTTHUMG00000162756 | 2.64 | 3.41 | 1.96 |
| OTTHUMG00000165099 | 2.64 | 3.45 | 2.02 |
| TMC05B             | 2.64 | 2.94 | 2.27 |
| OTTHUMG00000010107 | 2.64 | 3.01 | 2.27 |
| IL31               | 2.64 | 3.08 | 2.27 |
| LINC00609          | 2.64 | 3.03 | 2.18 |
| LOC574538          | 2.64 | 3.08 | 2.22 |
| OTTHUMG00000018730 | 2.64 | 3.26 | 2.28 |
| MIR496             | 2.64 | 2.94 | 2.26 |
| DSTNP4             | 2.64 | 3.60 | 2.05 |
| OTTHUMG00000036254 | 2.63 | 3.25 | 2.25 |
| SRD5A1P1           | 2.63 | 3.36 | 2.01 |
| TRIM64C            | 2.63 | 2.97 | 2.20 |
| ZNF479             | 2.63 | 3.77 | 1.99 |
| ZSCAN5B            | 2.63 | 3.04 | 2.22 |
| OTTHUMG00000155882 | 2.63 | 2.91 | 2.22 |
| FLJ44874           | 2.63 | 2.89 | 2.00 |
| RNA5SP44           | 2.63 | 2.95 | 2.18 |
| HSP90AA4P          | 2.63 | 2.94 | 2.21 |
| LCN9               | 2.63 | 3.08 | 2.30 |
| XIRP2-AS1          | 2.63 | 3.03 | 2.41 |
| CDH23-AS1          | 2.63 | 2.93 | 2.30 |

|                    |      |      |      |
|--------------------|------|------|------|
| OTTHUMG00000153366 | 2.63 | 2.92 | 2.15 |
| MIR518D            | 2.63 | 3.54 | 1.92 |
| OTTHUMG00000156611 | 2.63 | 3.39 | 2.43 |
| DPPA2              | 2.63 | 3.35 | 2.09 |
| OTTHUMG00000162296 | 2.63 | 3.14 | 2.25 |
| TPH2               | 2.63 | 3.21 | 2.12 |
| LOC554207          | 2.63 | 2.92 | 2.41 |
| SNORD116-23        | 2.63 | 3.23 | 1.67 |
| OTTHUMG00000161659 | 2.63 | 3.04 | 2.35 |
| SYCE1L             | 2.63 | 3.20 | 1.95 |
| RNA5SP327          | 2.63 | 3.18 | 2.01 |
| SPINK1             | 2.63 | 3.34 | 2.17 |
| C6orf7             | 2.63 | 3.51 | 1.90 |
| GALR1              | 2.63 | 2.85 | 2.25 |
| MIR3682            | 2.63 | 3.32 | 2.24 |
| OTTHUMG00000163214 | 2.63 | 3.32 | 2.19 |
| MIR4782            | 2.63 | 3.20 | 2.03 |
| GUCA1C             | 2.63 | 3.17 | 2.33 |
| USP27X-AS1         | 2.63 | 3.11 | 2.25 |
| OTTHUMG00000015661 | 2.63 | 2.93 | 2.16 |
| SNORD114-10        | 2.63 | 4.01 | 1.67 |
| LOC100506865       | 2.63 | 2.89 | 2.36 |
| OTTHUMG00000153648 | 2.63 | 3.51 | 2.03 |
| LGSN               | 2.63 | 3.11 | 2.30 |
| SNORD90            | 2.63 | 3.38 | 1.91 |
| OTTHUMG00000180046 | 2.63 | 3.25 | 2.07 |
| RNU5B-3P           | 2.62 | 3.31 | 2.03 |
| TMEM225            | 2.62 | 3.13 | 2.34 |
| OTTHUMG00000175451 | 2.62 | 3.52 | 1.90 |
| OTTHUMG00000171823 | 2.62 | 2.88 | 2.37 |
| ANKRD30B           | 2.62 | 3.42 | 2.05 |
| ARPP21-AS1         | 2.62 | 3.85 | 2.13 |
| C2orf80            | 2.62 | 3.05 | 2.41 |
| LINC00547          | 2.62 | 3.59 | 2.26 |
| OR11H6             | 2.62 | 3.19 | 2.29 |
| OTTHUMG00000040503 | 2.62 | 3.19 | 2.20 |
| OTTHUMG00000022365 | 2.62 | 3.12 | 2.16 |
| OTTHUMG00000172484 | 2.62 | 3.31 | 2.22 |
| NLGN1-AS1          | 2.62 | 3.25 | 2.16 |
| SULT1B1            | 2.62 | 3.68 | 2.07 |
| OTTHUMG00000055852 | 2.62 | 3.24 | 2.20 |
| STMND1             | 2.62 | 2.96 | 2.39 |
| OTTHUMG00000158576 | 2.62 | 3.36 | 1.98 |
| VAV3-AS1           | 2.62 | 2.93 | 2.09 |
| MIR4670            | 2.62 | 3.31 | 2.15 |
| CT49               | 2.62 | 3.19 | 2.09 |
| T1560              | 2.62 | 3.12 | 2.21 |
| OTTHUMG00000176917 | 2.62 | 3.36 | 1.60 |
| OTTHUMG00000170437 | 2.62 | 3.27 | 2.13 |



|                    |      |      |      |
|--------------------|------|------|------|
| OTTHUMG00000160044 | 2.62 | 3.01 | 2.33 |
| TRBV7-4            | 2.62 | 3.37 | 1.86 |
| CCL8               | 2.62 | 3.05 | 2.37 |
| OTTHUMG00000000507 | 2.62 | 3.12 | 1.91 |
| OTTHUMG00000165998 | 2.62 | 3.40 | 2.09 |
| OTTHUMG00000158236 | 2.62 | 3.20 | 2.20 |
| MIR3189            | 2.62 | 3.22 | 2.13 |
| OTTHUMG00000182228 | 2.62 | 3.16 | 2.31 |
| LRRIQ1             | 2.62 | 3.19 | 2.08 |
| DSCAM-AS1          | 2.61 | 2.92 | 2.42 |
| NAALADL2-AS2       | 2.61 | 3.32 | 2.12 |
| ZNF233             | 2.61 | 2.96 | 2.26 |
| OR13C3             | 2.61 | 3.15 | 2.16 |
| GSTA3              | 2.61 | 3.31 | 2.07 |
| OTTHUMG00000020098 | 2.61 | 3.41 | 2.30 |
| BRDT               | 2.61 | 3.16 | 2.24 |
| OTTHUMG00000179137 | 2.61 | 3.00 | 2.32 |
| METTL21C           | 2.61 | 2.97 | 2.42 |
| CCL11              | 2.61 | 3.40 | 1.98 |
| OR6C65             | 2.61 | 3.46 | 1.86 |
| OTTHUMG00000162674 | 2.61 | 3.00 | 2.15 |
| ARL14EPL           | 2.61 | 3.10 | 2.23 |
| OTTHUMG00000019514 | 2.61 | 3.25 | 2.08 |
| OTTHUMG00000165130 | 2.61 | 3.28 | 2.23 |
| MIR183             | 2.61 | 3.41 | 2.05 |
| LCE2C              | 2.61 | 3.60 | 1.79 |
| OTTHUMG00000160363 | 2.61 | 3.27 | 1.99 |
| OR5T2              | 2.61 | 3.20 | 1.89 |
| MLIP-IT1           | 2.61 | 2.88 | 2.14 |
| ZNF679             | 2.61 | 3.06 | 2.22 |
| ACTRT2             | 2.61 | 2.94 | 2.16 |
| HCAR2              | 2.61 | 3.21 | 1.55 |
| OR4L1              | 2.61 | 3.01 | 2.22 |
| OTTHUMG00000130102 | 2.61 | 3.22 | 2.19 |
| SNORD116-1         | 2.61 | 3.89 | 1.81 |
| OTTHUMG00000017052 | 2.61 | 2.93 | 2.03 |
| OTTHUMG00000162808 | 2.61 | 3.03 | 2.25 |
| OTTHUMG00000162901 | 2.61 | 3.37 | 2.16 |
| TTC9B              | 2.61 | 2.96 | 2.17 |
| OTTHUMG00000065034 | 2.61 | 3.01 | 2.35 |
| MIR154             | 2.61 | 3.66 | 1.79 |
| SLCO1B1            | 2.61 | 2.95 | 2.20 |
| PCDH9-AS1          | 2.60 | 3.57 | 2.12 |
| RNA5SP234          | 2.60 | 3.29 | 1.65 |
| OTTHUMG00000162122 | 2.60 | 3.17 | 2.19 |
| OTTHUMG00000151713 | 2.60 | 3.19 | 2.28 |
| MIR320D2           | 2.60 | 3.15 | 1.89 |
| OTTHUMG00000151369 | 2.60 | 2.95 | 2.31 |
| LOC100132078       | 2.60 | 2.99 | 2.30 |

|                    |      |      |      |
|--------------------|------|------|------|
| LOC101060277       | 2.60 | 2.95 | 2.21 |
| XKRY               | 2.60 | 3.29 | 2.02 |
| KLRF1              | 2.60 | 3.13 | 2.04 |
| OTTHUMG00000163168 | 2.60 | 3.16 | 2.24 |
| PPEF1-AS1          | 2.60 | 3.11 | 2.13 |
| OR5AP2             | 2.60 | 3.21 | 2.20 |
| POU6F2-AS2         | 2.60 | 3.01 | 2.23 |
| GPR158             | 2.60 | 3.17 | 2.31 |
| ANXA3              | 2.60 | 3.26 | 2.31 |
| OTTHUMG00000163475 | 2.60 | 3.10 | 2.12 |
| OTTHUMG00000158359 | 2.60 | 3.22 | 2.24 |
| USP26              | 2.60 | 2.97 | 2.30 |
| RNA5SP102          | 2.60 | 3.46 | 2.06 |
| HEPACAM2           | 2.60 | 3.16 | 2.11 |
| TRIM64             | 2.60 | 2.74 | 2.40 |
| OTTHUMG00000132738 | 2.60 | 3.43 | 2.17 |
| KRT12              | 2.60 | 3.51 | 2.04 |
| FSTL5              | 2.60 | 3.05 | 2.29 |
| OTTHUMG00000133747 | 2.60 | 3.39 | 2.12 |
| OTTHUMG00000158224 | 2.60 | 2.86 | 2.29 |
| OTTHUMG00000161217 | 2.60 | 3.16 | 2.13 |
| OTTHUMG00000169920 | 2.60 | 2.89 | 2.28 |
| PLCZ1              | 2.59 | 2.88 | 2.38 |
| OTTHUMG00000164912 | 2.59 | 3.55 | 2.04 |
| TMEM27             | 2.59 | 3.28 | 1.79 |
| OTTHUMG00000150106 | 2.59 | 3.17 | 2.34 |
| CA7                | 2.59 | 3.01 | 2.26 |
| OR4N5              | 2.59 | 3.13 | 1.97 |
| OTTHUMG00000015989 | 2.59 | 3.09 | 2.13 |
| OTTHUMG00000021529 | 2.59 | 3.14 | 1.97 |
| LOC284263          | 2.59 | 3.04 | 2.30 |
| OTTHUMG00000169288 | 2.59 | 3.25 | 1.87 |
| OTTHUMG00000178568 | 2.59 | 2.85 | 2.21 |
| OPA1-AS1           | 2.59 | 3.36 | 1.91 |
| OTTHUMG00000175783 | 2.59 | 2.87 | 2.41 |
| OTTHUMG00000160917 | 2.59 | 2.89 | 2.18 |
| ATXN3L             | 2.59 | 3.13 | 2.09 |
| C9orf57            | 2.59 | 2.85 | 2.17 |
| RNU6-60            | 2.59 | 3.49 | 1.41 |
| LINC00353          | 2.59 | 3.38 | 1.95 |
| LINC00462          | 2.59 | 3.13 | 2.09 |
| MIR4309            | 2.59 | 3.49 | 1.51 |
| GPR87              | 2.59 | 3.42 | 2.24 |
| OTTHUMG00000153708 | 2.59 | 2.98 | 2.29 |
| LOC728040          | 2.59 | 3.20 | 2.05 |
| MIR3188            | 2.59 | 3.34 | 1.83 |
| MIR4265            | 2.59 | 3.05 | 2.02 |
| OR2A14             | 2.59 | 3.25 | 2.17 |
| H3F3C              | 2.58 | 3.76 | 2.20 |

|                    |      |      |      |
|--------------------|------|------|------|
| OTTHUMG00000164436 | 2.58 | 2.89 | 2.08 |
| MIR485             | 2.58 | 2.93 | 2.27 |
| OTTHUMG00000171680 | 2.58 | 3.31 | 2.12 |
| ENO1-AS1           | 2.58 | 3.31 | 2.31 |
| UGT2B4             | 2.58 | 3.20 | 2.03 |
| OTTHUMG00000035627 | 2.58 | 3.20 | 2.14 |
| IQCF6              | 2.58 | 2.89 | 2.24 |
| PPBPP2             | 2.58 | 2.82 | 2.22 |
| ESCO2              | 2.58 | 3.01 | 2.42 |
| CATSPERB           | 2.58 | 2.89 | 2.10 |
| CLCA1              | 2.58 | 2.86 | 2.36 |
| LOC100506526       | 2.58 | 2.82 | 2.29 |
| OTTHUMG00000169673 | 2.58 | 3.23 | 2.18 |
| OTTHUMG00000153079 | 2.58 | 3.05 | 2.10 |
| OTTHUMG00000151816 | 2.58 | 3.15 | 2.31 |
| OTTHUMG00000157253 | 2.58 | 3.26 | 2.04 |
| KRTAP24-1          | 2.58 | 3.07 | 2.40 |
| OTTHUMG00000164046 | 2.58 | 3.01 | 2.13 |
| IGLV5-48           | 2.58 | 3.54 | 1.69 |
| GABRA1             | 2.58 | 2.99 | 2.31 |
| SPATA22            | 2.58 | 3.10 | 2.07 |
| LOC100505862       | 2.57 | 3.15 | 2.21 |
| TRIM49             | 2.57 | 2.87 | 2.18 |
| OTTHUMG00000016533 | 2.57 | 2.91 | 2.39 |
| OTTHUMG00000162603 | 2.57 | 3.36 | 2.20 |
| AADAC              | 2.57 | 3.15 | 2.07 |
| OR10T2             | 2.57 | 3.44 | 2.22 |
| OTTHUMG00000169687 | 2.57 | 2.85 | 2.37 |
| OTTHUMG00000168912 | 2.57 | 2.98 | 2.23 |
| LINC00305          | 2.57 | 2.89 | 2.18 |
| MIR519A2           | 2.57 | 3.23 | 2.17 |
| MIR135A1           | 2.57 | 3.02 | 2.15 |
| OTTHUMG00000151487 | 2.57 | 3.23 | 2.24 |
| TRAJ12             | 2.57 | 3.80 | 2.07 |
| LINC00470          | 2.57 | 3.17 | 2.00 |
| KRTAP13-4          | 2.57 | 2.97 | 2.22 |
| FLJ45872           | 2.57 | 2.88 | 1.90 |
| MIR4727            | 2.57 | 2.99 | 2.08 |
| OTTHUMG00000154555 | 2.57 | 2.94 | 2.28 |
| CTSL3P             | 2.57 | 3.11 | 1.83 |
| MIR873             | 2.57 | 3.28 | 2.03 |
| OTTHUMG00000165952 | 2.57 | 2.89 | 2.21 |
| OTTHUMG00000048149 | 2.57 | 3.47 | 2.11 |
| MIR4438            | 2.57 | 3.32 | 1.66 |
| OR4D1              | 2.56 | 2.90 | 2.20 |
| MROH9              | 2.56 | 3.38 | 2.15 |
| MIR3166            | 2.56 | 2.86 | 2.24 |
| GCSH               | 2.56 | 3.34 | 1.97 |
| SNORA58            | 2.56 | 3.64 | 1.71 |

|                     |      |      |      |
|---------------------|------|------|------|
| OTTHUMG00000015930  | 2.56 | 2.84 | 2.01 |
| RNA5SP421           | 2.56 | 3.04 | 1.87 |
| LHFPL3              | 2.56 | 2.89 | 2.28 |
| OTTHUMG00000032767  | 2.56 | 3.19 | 2.30 |
| LINC00113           | 2.56 | 3.06 | 2.08 |
| OR2F1               | 2.56 | 3.15 | 2.23 |
| CCDC148             | 2.56 | 2.80 | 2.42 |
| MIR3976             | 2.56 | 3.58 | 1.83 |
| OTTHUMG000000162602 | 2.56 | 3.12 | 2.21 |
| FRMD6-AS2           | 2.56 | 2.94 | 2.25 |
| OTTHUMG000000163633 | 2.56 | 2.88 | 2.21 |
| OTTHUMG000000170971 | 2.56 | 3.18 | 1.92 |
| MIR376A2            | 2.56 | 3.76 | 1.52 |
| UBE2E1-AS1          | 2.56 | 3.13 | 2.07 |
| OTTHUMG00000007633  | 2.56 | 3.31 | 2.32 |
| LOC100130815        | 2.56 | 3.08 | 2.01 |
| ANKRD45             | 2.56 | 2.99 | 2.19 |
| LOC100505474        | 2.56 | 3.06 | 2.15 |
| COX7B2              | 2.56 | 3.07 | 2.11 |
| OTTHUMG000000172008 | 2.55 | 3.08 | 2.13 |
| IGHV3-35            | 2.55 | 3.94 | 1.83 |
| SHCBP1L             | 2.55 | 2.84 | 2.35 |
| FABP7               | 2.55 | 2.90 | 2.24 |
| OTTHUMG000000156952 | 2.55 | 2.99 | 2.20 |
| LINC00379           | 2.55 | 3.38 | 2.07 |
| CEACAM6             | 2.55 | 3.24 | 2.17 |
| OTTHUMG000000171560 | 2.55 | 2.94 | 2.19 |
| TOPAZ1              | 2.55 | 3.01 | 2.24 |
| LOC339468           | 2.55 | 3.01 | 2.12 |
| OTTHUMG000000161297 | 2.55 | 2.89 | 2.14 |
| MEIG1               | 2.55 | 2.91 | 2.36 |
| HTR2C-IT1           | 2.55 | 3.38 | 2.20 |
| LOC283922           | 2.55 | 2.96 | 2.08 |
| OR11G2              | 2.55 | 3.21 | 2.21 |
| OTTHUMG000000154142 | 2.55 | 2.75 | 2.32 |
| OTTHUMG000000164211 | 2.55 | 3.31 | 2.15 |
| LOC255177           | 2.55 | 3.08 | 2.29 |
| OTTHUMG000000158064 | 2.55 | 2.88 | 2.32 |
| LOC100133050        | 2.55 | 3.13 | 2.06 |
| MMP7                | 2.55 | 3.18 | 2.30 |
| OTX2-AS1            | 2.55 | 3.18 | 2.16 |
| OTTHUMG000000169929 | 2.54 | 3.14 | 2.12 |
| OTTHUMG000000164332 | 2.54 | 3.06 | 2.09 |
| CTAGE7P             | 2.54 | 2.86 | 2.10 |
| LINC00266-4P        | 2.54 | 3.11 | 2.09 |
| OTTHUMG000000167315 | 2.54 | 3.07 | 2.20 |
| KRT6C               | 2.54 | 3.25 | 1.99 |
| KRTAP19-8           | 2.54 | 2.93 | 2.25 |
| RGS13               | 2.54 | 3.05 | 2.13 |

|                    |      |      |      |
|--------------------|------|------|------|
| LOC100996635       | 2.54 | 2.92 | 2.24 |
| MIR1185-1          | 2.54 | 3.92 | 2.01 |
| PPP1R3A            | 2.54 | 2.82 | 2.14 |
| TRBJ2-4            | 2.54 | 3.52 | 1.73 |
| MIR4718            | 2.54 | 3.22 | 1.61 |
| MIR15B             | 2.54 | 3.04 | 2.02 |
| OTTHUMG00000160369 | 2.54 | 3.04 | 2.16 |
| TRAV16             | 2.54 | 2.92 | 2.10 |
| PMCH               | 2.54 | 3.10 | 2.00 |
| RERGL              | 2.54 | 2.94 | 2.14 |
| CNTN4-AS2          | 2.54 | 3.14 | 2.25 |
| OTTHUMG00000151939 | 2.54 | 3.10 | 2.10 |
| OTTHUMG00000074551 | 2.54 | 3.02 | 2.25 |
| RNA5SP95           | 2.54 | 3.29 | 1.50 |
| KRTAP3-3           | 2.54 | 3.27 | 1.89 |
| OTTHUMG00000169275 | 2.54 | 2.83 | 2.22 |
| MIR1253            | 2.54 | 3.27 | 1.81 |
| VN1R4              | 2.54 | 3.26 | 1.94 |
| OTTHUMG00000017954 | 2.53 | 2.94 | 2.25 |
| MIR34B             | 2.53 | 3.04 | 1.92 |
| HSD3B1             | 2.53 | 3.91 | 1.88 |
| TRAJ61             | 2.53 | 3.27 | 2.13 |
| OTTHUMG00000015404 | 2.53 | 2.77 | 2.30 |
| MIR487A            | 2.53 | 3.09 | 2.17 |
| TRIM60             | 2.53 | 2.92 | 2.28 |
| OTTHUMG00000169781 | 2.53 | 2.95 | 2.08 |
| RNA5SP355          | 2.53 | 3.43 | 1.97 |
| IFNA6              | 2.53 | 3.03 | 2.11 |
| C11orf88           | 2.53 | 3.04 | 2.04 |
| SULT1E1            | 2.53 | 2.82 | 2.34 |
| OTTHUMG00000015084 | 2.53 | 2.95 | 2.06 |
| OTTHUMG00000163717 | 2.53 | 3.08 | 2.20 |
| LOC100996694       | 2.53 | 3.19 | 1.97 |
| OTTHUMG00000160297 | 2.53 | 3.05 | 2.12 |
| LOC100652856       | 2.53 | 2.96 | 2.21 |
| DEFB114            | 2.53 | 3.13 | 1.99 |
| GATM-AS1           | 2.53 | 2.96 | 2.09 |
| CLYBL-AS1          | 2.53 | 2.91 | 2.21 |
| CXADR              | 2.53 | 3.05 | 1.99 |
| MGAT4C             | 2.53 | 3.15 | 2.18 |
| DACH2              | 2.53 | 2.73 | 2.23 |
| OTTHUMG00000066612 | 2.53 | 2.91 | 2.24 |
| SNORA2A            | 2.53 | 3.49 | 2.00 |
| OTTHUMG00000020400 | 2.53 | 2.94 | 2.26 |
| OTTHUMG00000170606 | 2.53 | 3.92 | 2.00 |
| CD40LG             | 2.53 | 3.18 | 2.06 |
| TEX21P             | 2.53 | 2.92 | 2.25 |
| LAIR2              | 2.53 | 3.35 | 2.07 |
| OTTHUMG00000166062 | 2.53 | 3.00 | 1.98 |

|                    |      |      |      |
|--------------------|------|------|------|
| LOC100506937       | 2.52 | 2.97 | 2.27 |
| MBOAT4             | 2.52 | 3.10 | 2.27 |
| CLDN10-AS1         | 2.52 | 2.94 | 2.17 |
| TRPC3              | 2.52 | 2.97 | 2.28 |
| SNORD116-26        | 2.52 | 2.95 | 1.82 |
| MEIOB              | 2.52 | 2.75 | 2.23 |
| OTTHUMG00000161925 | 2.52 | 2.87 | 2.22 |
| OTTHUMG00000163029 | 2.52 | 2.85 | 2.28 |
| LDHC               | 2.52 | 3.18 | 2.02 |
| OTTHUMG00000163118 | 2.52 | 3.04 | 2.11 |
| OR51Q1             | 2.52 | 2.94 | 2.11 |
| D21S2090E          | 2.52 | 2.92 | 2.06 |
| OTTHUMG00000170809 | 2.52 | 2.86 | 2.10 |
| OTTHUMG00000169331 | 2.52 | 2.93 | 2.16 |
| OR51C1P            | 2.52 | 3.49 | 2.20 |
| PCDHB17            | 2.52 | 3.20 | 1.92 |
| RNF17              | 2.52 | 2.92 | 2.16 |
| C6ORF50            | 2.52 | 3.05 | 2.21 |
| TRIM36-IT1         | 2.52 | 3.15 | 2.00 |
| OTTHUMG00000153722 | 2.52 | 3.13 | 2.29 |
| ZNF763             | 2.52 | 3.23 | 1.93 |
| OTTHUMG00000183863 | 2.52 | 2.94 | 2.28 |
| OTTHUMG00000154306 | 2.52 | 2.80 | 2.20 |
| HERC2P10           | 2.52 | 3.26 | 2.18 |
| GLRA2              | 2.52 | 3.12 | 2.05 |
| OTTHUMG00000170356 | 2.52 | 2.90 | 2.12 |
| OTTHUMG00000022543 | 2.52 | 3.31 | 1.82 |
| C1orf146           | 2.51 | 2.84 | 2.26 |
| OTTHUMG00000169347 | 2.51 | 3.12 | 2.05 |
| OTTHUMG00000133689 | 2.51 | 3.02 | 2.21 |
| OTTHUMG00000154379 | 2.51 | 3.00 | 2.24 |
| GOLGA8T            | 2.51 | 3.04 | 1.91 |
| OTTHUMG00000035544 | 2.51 | 3.02 | 2.22 |
| OTTHUMG00000016461 | 2.51 | 2.90 | 2.17 |
| OTTHUMG00000035527 | 2.51 | 2.83 | 2.07 |
| RNU5F-2P           | 2.51 | 3.24 | 1.89 |
| OTTHUMG00000168333 | 2.51 | 3.22 | 2.04 |
| DSCR4-IT1          | 2.51 | 3.23 | 1.84 |
| NANOG              | 2.51 | 3.04 | 1.44 |
| OTTHUMG00000170436 | 2.51 | 2.77 | 2.14 |
| IZUMO3             | 2.51 | 3.05 | 2.14 |
| FBXO43             | 2.51 | 2.80 | 2.04 |
| LOC283585          | 2.51 | 2.72 | 2.16 |
| MIR3945            | 2.51 | 3.42 | 2.12 |
| AKIRIN2-AS1        | 2.51 | 2.88 | 2.23 |
| MIR4433            | 2.51 | 3.97 | 1.69 |
| OTTHUMG00000009658 | 2.51 | 3.08 | 2.20 |
| OTTHUMG00000155439 | 2.50 | 3.16 | 2.21 |
| TKTL2              | 2.50 | 3.14 | 1.98 |

|                     |      |      |      |
|---------------------|------|------|------|
| MIR302C             | 2.50 | 3.08 | 1.90 |
| LOC728739           | 2.50 | 2.89 | 2.16 |
| OTTHUMG00000015064  | 2.50 | 2.83 | 1.99 |
| OTTHUMG000000153097 | 2.50 | 2.99 | 2.00 |
| OTTHUMG000000161298 | 2.50 | 3.16 | 2.26 |
| MTUS2-AS2           | 2.50 | 2.84 | 2.11 |
| OTTHUMG000000167709 | 2.50 | 3.24 | 2.12 |
| OR9G4               | 2.50 | 3.05 | 2.10 |
| OTTHUMG000000164494 | 2.50 | 3.12 | 2.06 |
| OTTHUMG000000169739 | 2.50 | 2.88 | 1.96 |
| LRRC63              | 2.50 | 2.91 | 2.00 |
| LINC00890           | 2.50 | 2.71 | 2.23 |
| OTTHUMG000000161115 | 2.50 | 3.09 | 2.18 |
| RPL31P11            | 2.50 | 2.80 | 2.26 |
| MIR549              | 2.50 | 3.07 | 2.10 |
| AFP                 | 2.50 | 2.97 | 2.23 |
| UBXN7-AS1           | 2.50 | 2.88 | 2.29 |
| MS4A6E              | 2.50 | 2.81 | 2.20 |
| MIR323A             | 2.50 | 3.60 | 1.77 |
| OTTHUMG00000014347  | 2.50 | 3.22 | 2.07 |
| LINC00378           | 2.50 | 2.84 | 2.15 |
| RNA5SP296           | 2.50 | 3.38 | 1.92 |
| KLRC1               | 2.50 | 3.04 | 2.08 |
| AFF2-IT1            | 2.50 | 2.91 | 2.09 |
| ASIC5               | 2.50 | 3.06 | 2.17 |
| MIR1284             | 2.49 | 3.19 | 1.90 |
| OTTHUMG000000172114 | 2.49 | 2.89 | 2.07 |
| FLJ25363            | 2.49 | 3.30 | 2.15 |
| C3orf30             | 2.49 | 2.61 | 2.32 |
| USP44               | 2.49 | 2.82 | 2.21 |
| LRRC9               | 2.49 | 2.69 | 2.26 |
| POF1B               | 2.49 | 3.00 | 2.13 |
| APOOP5              | 2.49 | 3.23 | 2.15 |
| MIR4503             | 2.49 | 3.65 | 1.86 |
| LINC00911           | 2.49 | 2.89 | 2.03 |
| APOL5               | 2.49 | 3.06 | 1.96 |
| ZNF849P             | 2.49 | 2.86 | 1.93 |
| SH2D1B              | 2.49 | 2.80 | 1.89 |
| OTTHUMG000000168958 | 2.49 | 2.80 | 2.19 |
| EQTN                | 2.49 | 3.16 | 2.12 |
| LOC100506869        | 2.49 | 2.80 | 2.12 |
| HPYR1               | 2.49 | 2.94 | 2.17 |
| MIR1272             | 2.49 | 2.83 | 2.14 |
| OTTHUMG000000165498 | 2.49 | 2.95 | 1.92 |
| RNA5SP67            | 2.49 | 3.85 | 1.90 |
| RNA5SP372           | 2.49 | 3.68 | 1.78 |
| OTTHUMG00000018329  | 2.49 | 2.92 | 2.01 |
| LOC100289656        | 2.49 | 3.05 | 2.18 |
| OTTHUMG000000153710 | 2.48 | 2.87 | 2.05 |

|                    |      |      |      |
|--------------------|------|------|------|
| OTTHUMG00000169661 | 2.48 | 2.79 | 2.10 |
| OTTHUMG00000154143 | 2.48 | 2.94 | 1.91 |
| SETP20             | 2.48 | 3.15 | 2.13 |
| LOC152586          | 2.48 | 2.80 | 2.07 |
| OTTHUMG00000016051 | 2.48 | 4.18 | 2.04 |
| SH3GL2             | 2.48 | 2.81 | 2.04 |
| OTTHUMG00000161181 | 2.48 | 2.84 | 2.28 |
| MIR520D            | 2.48 | 3.26 | 2.01 |
| SPINK8             | 2.48 | 2.81 | 2.19 |
| OTTHUMG00000171784 | 2.48 | 3.07 | 2.19 |
| FBXW10             | 2.48 | 2.95 | 2.06 |
| OTTHUMG00000018629 | 2.48 | 2.81 | 2.12 |
| LOC441666          | 2.48 | 3.36 | 2.07 |
| OTTHUMG00000009842 | 2.48 | 2.70 | 2.13 |
| OTTHUMG00000016555 | 2.48 | 3.15 | 2.08 |
| HIST1H3G           | 2.48 | 3.97 | 1.84 |
| ADH6               | 2.48 | 2.95 | 2.14 |
| SNORD114-9         | 2.48 | 3.54 | 1.82 |
| ARL2BPP2           | 2.48 | 2.96 | 2.04 |
| OTTHUMG00000152909 | 2.48 | 2.90 | 2.31 |
| LINC00189          | 2.47 | 2.92 | 2.12 |
| OR6X1              | 2.47 | 2.99 | 2.23 |
| OTTHUMG00000171116 | 2.47 | 2.82 | 1.97 |
| RNA5SP407          | 2.47 | 3.22 | 1.49 |
| OTTHUMG00000169480 | 2.47 | 2.79 | 2.09 |
| LOC100287632       | 2.47 | 3.07 | 2.24 |
| LOC286094          | 2.47 | 2.76 | 2.26 |
| OTTHUMG00000170667 | 2.47 | 3.49 | 1.94 |
| OTTHUMG00000031892 | 2.47 | 2.83 | 2.15 |
| SYCE3              | 2.47 | 2.89 | 2.25 |
| OTTHUMG00000163543 | 2.47 | 3.14 | 2.00 |
| OTTHUMG00000161247 | 2.47 | 2.82 | 2.17 |
| OTTHUMG00000008126 | 2.47 | 3.14 | 1.82 |
| OTTHUMG00000039910 | 2.47 | 2.70 | 2.12 |
| OTTHUMG00000172356 | 2.47 | 3.00 | 2.09 |
| LOC441493          | 2.47 | 3.11 | 2.00 |
| OR52K1             | 2.47 | 3.13 | 1.77 |
| IFNA13             | 2.47 | 3.27 | 1.76 |
| DNM3-IT1           | 2.47 | 2.82 | 2.13 |
| RNF133             | 2.47 | 3.28 | 2.02 |
| ARID4B-IT1         | 2.47 | 3.00 | 1.90 |
| NAT2               | 2.47 | 3.09 | 1.77 |
| LOC100507559       | 2.47 | 2.80 | 2.11 |
| LOC646168          | 2.46 | 3.08 | 2.15 |
| DTHD1              | 2.46 | 2.85 | 2.08 |
| MIR525             | 2.46 | 3.09 | 1.91 |
| ODAM               | 2.46 | 2.84 | 2.17 |
| KLHL6-AS1          | 2.46 | 3.05 | 1.93 |
| OTTHUMG00000171463 | 2.46 | 2.92 | 1.98 |



|                    |      |      |      |
|--------------------|------|------|------|
| ARL14              | 2.46 | 2.77 | 2.05 |
| OTTHUMG00000158345 | 2.46 | 3.22 | 2.13 |
| RNA5SP489          | 2.46 | 3.88 | 1.82 |
| OTTHUMG00000041157 | 2.46 | 3.02 | 2.07 |
| SPRR2B             | 2.46 | 3.03 | 1.84 |
| OTTHUMG00000164348 | 2.46 | 2.84 | 2.01 |
| OTTHUMG00000010911 | 2.46 | 2.96 | 1.94 |
| ZNF724P            | 2.46 | 2.98 | 1.81 |
| OTTHUMG00000154381 | 2.46 | 2.68 | 2.12 |
| OTTHUMG00000154865 | 2.46 | 3.59 | 1.86 |
| OTTHUMG00000166372 | 2.46 | 2.84 | 2.13 |
| OTTHUMG00000180457 | 2.46 | 3.51 | 1.88 |
| OTTHUMG00000162373 | 2.46 | 2.86 | 2.14 |
| RNA5SP177          | 2.46 | 3.71 | 1.87 |
| MIR548AG2          | 2.46 | 3.15 | 1.62 |
| THEMIS             | 2.45 | 2.73 | 2.18 |
| LINC00326          | 2.45 | 2.66 | 2.15 |
| MIR652             | 2.45 | 2.84 | 1.97 |
| OTTHUMG00000041308 | 2.45 | 3.21 | 1.96 |
| MIR4527            | 2.45 | 3.20 | 1.84 |
| RNU5A-5P           | 2.45 | 3.28 | 1.54 |
| ADAM2              | 2.45 | 2.80 | 2.22 |
| PDCL2              | 2.45 | 2.78 | 2.13 |
| RNA5SP231          | 2.45 | 2.97 | 2.20 |
| OTTHUMG00000171822 | 2.45 | 2.80 | 1.96 |
| OTTHUMG00000163520 | 2.45 | 2.86 | 2.18 |
| OTTHUMG00000169348 | 2.45 | 2.81 | 2.13 |
| SPANXC             | 2.45 | 4.41 | 1.55 |
| HSFY1P1            | 2.45 | 3.16 | 1.88 |
| LCE3E              | 2.45 | 3.10 | 2.10 |
| RNA5SP438          | 2.45 | 3.47 | 1.81 |
| TINAG              | 2.45 | 2.66 | 2.20 |
| RNA5SP81           | 2.45 | 3.11 | 1.83 |
| CD69               | 2.45 | 2.92 | 2.12 |
| OTTHUMG00000161304 | 2.45 | 2.85 | 2.06 |
| OTTHUMG00000021163 | 2.45 | 2.73 | 2.21 |
| NDST4              | 2.45 | 2.78 | 1.96 |
| LINC00605          | 2.45 | 2.74 | 2.06 |
| PIK3C2G            | 2.45 | 2.88 | 2.13 |
| OTTHUMG00000161291 | 2.45 | 2.83 | 2.16 |
| UBTFL1             | 2.45 | 2.85 | 1.72 |
| NRG1-IT2           | 2.45 | 2.90 | 1.98 |
| OTTHUMG00000161883 | 2.45 | 2.63 | 2.25 |
| OTTHUMG00000163813 | 2.44 | 2.94 | 1.88 |
| GMCL1P1            | 2.44 | 3.02 | 1.69 |
| ZNF705G            | 2.44 | 3.02 | 1.97 |
| OTTHUMG00000014342 | 2.44 | 2.99 | 2.02 |
| ACTR3BP2           | 2.44 | 3.08 | 2.11 |
| MIR182             | 2.44 | 2.96 | 2.11 |

|                    |      |      |      |
|--------------------|------|------|------|
| PAGE3              | 2.44 | 2.97 | 2.23 |
| FCRL5              | 2.44 | 2.79 | 1.71 |
| FAM5C              | 2.44 | 2.70 | 2.16 |
| PLS1-AS1           | 2.44 | 2.91 | 2.03 |
| CRH                | 2.44 | 2.66 | 2.05 |
| GRM7-AS3           | 2.44 | 2.86 | 2.19 |
| OTTHUMG00000159088 | 2.44 | 2.83 | 2.15 |
| CACNA1C-IT2        | 2.44 | 2.87 | 2.05 |
| OTTHUMG00000153759 | 2.44 | 2.70 | 2.16 |
| OTTHUMG00000171051 | 2.43 | 2.77 | 2.16 |
| VIP                | 2.43 | 2.70 | 2.25 |
| CCDC148-AS1        | 2.43 | 2.98 | 2.10 |
| OTTHUMG00000155418 | 2.43 | 2.81 | 2.07 |
| OTTHUMG00000015254 | 2.43 | 2.67 | 2.23 |
| OTTHUMG00000160611 | 2.43 | 3.07 | 2.04 |
| OTTHUMG00000015949 | 2.43 | 2.77 | 2.04 |
| F13B               | 2.43 | 2.80 | 2.06 |
| DEFB129            | 2.43 | 2.92 | 1.91 |
| HBD                | 2.43 | 3.19 | 2.04 |
| OTTHUMG00000168900 | 2.43 | 2.94 | 1.96 |
| OTTHUMG00000171069 | 2.43 | 2.64 | 2.08 |
| MIR3115            | 2.43 | 2.92 | 1.99 |
| MIR526A2           | 2.43 | 3.07 | 2.10 |
| HIST3H3            | 2.43 | 2.77 | 2.06 |
| OTTHUMG00000170011 | 2.43 | 2.67 | 2.01 |
| MIR380             | 2.43 | 3.30 | 1.83 |
| MIR591             | 2.42 | 2.64 | 2.24 |
| NCKAP5-IT1         | 2.42 | 2.87 | 1.81 |
| SPINT3             | 2.42 | 3.10 | 2.14 |
| OTTHUMG00000017237 | 2.42 | 2.77 | 2.03 |
| OTTHUMG00000161691 | 2.42 | 3.04 | 1.95 |
| CCDC54             | 2.42 | 2.81 | 2.08 |
| SCGB2A2            | 2.42 | 3.02 | 1.93 |
| LOC100144595       | 2.42 | 2.97 | 2.05 |
| OTTHUMG00000151752 | 2.42 | 2.93 | 1.95 |
| LINC00345          | 2.42 | 2.94 | 1.97 |
| OTTHUMG00000164035 | 2.42 | 3.59 | 1.53 |
| OTTHUMG00000153912 | 2.42 | 2.97 | 1.87 |
| FAM66E             | 2.42 | 3.47 | 1.68 |
| ZNF705A            | 2.42 | 2.83 | 2.08 |
| OTTHUMG00000160075 | 2.42 | 2.71 | 2.19 |
| BCL2L10            | 2.42 | 2.72 | 1.74 |
| OTTHUMG00000032037 | 2.42 | 3.07 | 2.09 |
| OTTHUMG00000161384 | 2.42 | 3.08 | 2.00 |
| GSTA2              | 2.42 | 3.41 | 1.65 |
| MIR4752            | 2.42 | 2.69 | 2.06 |
| SCG3               | 2.42 | 2.97 | 2.04 |
| OTTHUMG00000015055 | 2.42 | 2.80 | 1.73 |
| SPATA31D3          | 2.42 | 3.14 | 1.95 |

|                    |      |      |      |
|--------------------|------|------|------|
| OTTHUMG00000164665 | 2.42 | 2.71 | 2.20 |
| MIR142             | 2.42 | 3.13 | 1.76 |
| MIR4666A           | 2.42 | 2.99 | 1.93 |
| FLJ31958           | 2.42 | 3.15 | 1.97 |
| C5orf48            | 2.42 | 2.74 | 1.96 |
| KRTAP4-5           | 2.42 | 2.86 | 2.09 |
| LOC646999          | 2.41 | 3.05 | 1.60 |
| OTTHUMG00000153414 | 2.41 | 2.82 | 2.23 |
| FBXO47             | 2.41 | 3.15 | 2.16 |
| OTTHUMG00000162625 | 2.41 | 3.01 | 2.09 |
| OTTHUMG00000156616 | 2.41 | 2.81 | 2.14 |
| LOC100288079       | 2.41 | 2.88 | 2.13 |
| OR4K15             | 2.41 | 2.81 | 1.75 |
| RNA5SP183          | 2.41 | 3.42 | 1.75 |
| RNA5SP476          | 2.41 | 3.39 | 1.77 |
| OTTHUMG00000164655 | 2.41 | 2.73 | 1.85 |
| ZBBX               | 2.41 | 2.69 | 2.03 |
| TTC29              | 2.41 | 2.59 | 1.97 |
| OTTHUMG00000021281 | 2.41 | 2.74 | 2.18 |
| OTTHUMG00000171620 | 2.41 | 2.93 | 1.75 |
| MIR3649            | 2.41 | 3.51 | 1.62 |
| MIR498             | 2.41 | 2.72 | 1.77 |
| OTTHUMG00000171911 | 2.41 | 2.82 | 2.01 |
| C12orf50           | 2.41 | 2.97 | 2.15 |
| OTTHUMG00000162768 | 2.41 | 2.96 | 1.93 |
| GYPB               | 2.41 | 2.72 | 2.13 |
| RNU7-60P           | 2.40 | 3.60 | 1.76 |
| OR5M9              | 2.40 | 3.03 | 2.06 |
| OTTHUMG00000160432 | 2.40 | 2.76 | 1.95 |
| PAGE4              | 2.40 | 2.61 | 2.24 |
| OR52N2             | 2.40 | 2.73 | 2.18 |
| OTTHUMG00000158284 | 2.40 | 2.80 | 2.10 |
| OTTHUMG00000132778 | 2.40 | 2.74 | 2.10 |
| LOC100130298       | 2.40 | 2.79 | 2.10 |
| OTTHUMG00000164307 | 2.40 | 3.58 | 1.89 |
| ZSCAN4             | 2.40 | 2.70 | 2.06 |
| C21orf37           | 2.40 | 2.63 | 2.12 |
| MIR520B            | 2.40 | 3.26 | 1.79 |
| SNORA30            | 2.40 | 2.70 | 2.04 |
| DSG1               | 2.40 | 2.88 | 2.00 |
| LOC283299          | 2.40 | 2.91 | 2.03 |
| OR7D1P             | 2.40 | 3.02 | 1.92 |
| MT1B               | 2.40 | 2.78 | 2.07 |
| OTTHUMG00000150928 | 2.40 | 2.66 | 2.11 |
| MIR429             | 2.40 | 3.02 | 2.10 |
| DSG3               | 2.40 | 2.72 | 2.06 |
| OTTHUMG00000172112 | 2.40 | 2.98 | 2.08 |
| FTMT               | 2.39 | 2.67 | 1.90 |
| LOC729307          | 2.39 | 3.09 | 2.00 |

|                    |      |      |      |
|--------------------|------|------|------|
| OR51A7             | 2.39 | 3.12 | 1.98 |
| MIR19B2            | 2.39 | 3.20 | 1.92 |
| OTTHUMG00000154028 | 2.39 | 2.98 | 2.22 |
| RSU1P2             | 2.39 | 2.84 | 1.89 |
| FLJ37505           | 2.39 | 2.64 | 2.14 |
| OTTHUMG00000166985 | 2.39 | 3.24 | 1.85 |
| MIR578             | 2.39 | 3.11 | 2.03 |
| DEFB133            | 2.39 | 2.68 | 1.73 |
| OTTHUMG00000160367 | 2.39 | 2.79 | 2.17 |
| TRAV24             | 2.39 | 2.72 | 2.07 |
| RBMV2EP            | 2.39 | 3.62 | 1.84 |
| MIR4280            | 2.39 | 4.14 | 1.75 |
| MIR4261            | 2.39 | 2.98 | 1.82 |
| LOC100507477       | 2.39 | 2.89 | 2.00 |
| OTTHUMG00000153580 | 2.39 | 2.66 | 2.23 |
| CSN1S2AP           | 2.39 | 3.23 | 2.07 |
| LINC00682          | 2.39 | 2.66 | 2.10 |
| OTTHUMG00000035971 | 2.39 | 2.81 | 2.02 |
| ANKRD62            | 2.39 | 2.89 | 2.13 |
| OTTHUMG00000160879 | 2.39 | 2.88 | 1.89 |
| RGS7               | 2.38 | 2.62 | 2.00 |
| LOC645355          | 2.38 | 2.70 | 2.13 |
| OTTHUMG00000078327 | 2.38 | 2.93 | 1.94 |
| OTTHUMG00000169394 | 2.38 | 2.90 | 2.06 |
| DYDC1              | 2.38 | 2.85 | 1.93 |
| OR4D5              | 2.38 | 3.08 | 1.93 |
| OTTHUMG00000164124 | 2.38 | 3.30 | 1.94 |
| XKR3               | 2.38 | 2.84 | 2.04 |
| LOC152578          | 2.38 | 2.85 | 2.03 |
| TRAPPC3L           | 2.38 | 2.95 | 1.74 |
| TAAR1              | 2.38 | 2.97 | 1.94 |
| RNASE10            | 2.38 | 2.82 | 1.94 |
| OTTHUMG00000160229 | 2.38 | 3.35 | 1.91 |
| LRRD1              | 2.38 | 2.67 | 2.11 |
| RNA5SP90           | 2.38 | 2.97 | 1.95 |
| LOC285501          | 2.38 | 2.69 | 2.17 |
| C7orf69            | 2.38 | 2.77 | 2.04 |
| OTTHUMG00000019729 | 2.38 | 2.67 | 1.75 |
| MIR378C            | 2.38 | 3.10 | 1.97 |
| OTTHUMG00000058921 | 2.38 | 2.77 | 1.68 |
| RNA5SP466          | 2.38 | 3.14 | 1.72 |
| OTTHUMG00000162196 | 2.38 | 2.67 | 2.04 |
| OTTHUMG00000168404 | 2.38 | 2.81 | 2.12 |
| OTTHUMG00000074549 | 2.38 | 2.90 | 2.15 |
| C7orf72            | 2.38 | 2.83 | 2.10 |
| CCDC39-AS1         | 2.38 | 3.16 | 1.75 |
| CNBD1              | 2.37 | 2.68 | 2.12 |
| OR4D2              | 2.37 | 3.59 | 1.47 |
| SCN2A              | 2.37 | 3.19 | 1.73 |

|                    |      |      |      |
|--------------------|------|------|------|
| ZNF92              | 2.37 | 3.29 | 1.53 |
| OTTHUMG00000171993 | 2.37 | 2.86 | 2.06 |
| OTTHUMG00000153158 | 2.37 | 3.05 | 2.11 |
| OTTHUMG00000170687 | 2.37 | 2.83 | 1.93 |
| OTTHUMG00000161469 | 2.37 | 2.61 | 2.15 |
| EBLN1              | 2.37 | 3.36 | 1.83 |
| MIR4664            | 2.37 | 2.88 | 2.01 |
| RFPL4A             | 2.37 | 3.11 | 1.96 |
| MIR4764            | 2.37 | 3.13 | 1.88 |
| SOSTDC1            | 2.37 | 2.69 | 2.01 |
| OTTHUMG00000151001 | 2.37 | 2.69 | 2.13 |
| SNORD12B           | 2.37 | 2.95 | 1.84 |
| OTTHUMG00000010912 | 2.37 | 2.68 | 1.81 |
| OR4K5              | 2.37 | 3.36 | 1.92 |
| OTTHUMG00000154108 | 2.37 | 2.98 | 1.95 |
| LINC00587          | 2.37 | 2.86 | 1.86 |
| RGS18              | 2.37 | 2.80 | 2.02 |
| MIR4500            | 2.37 | 3.51 | 1.77 |
| OTTHUMG00000169845 | 2.37 | 2.66 | 2.02 |
| LOC100507207       | 2.37 | 2.85 | 2.15 |
| LOC100130964       | 2.36 | 3.03 | 1.95 |
| RNU105C            | 2.36 | 2.75 | 2.09 |
| OTTHUMG00000164414 | 2.36 | 3.22 | 1.98 |
| OTTHUMG00000164546 | 2.36 | 3.20 | 1.76 |
| LGALS13            | 2.36 | 2.78 | 2.03 |
| OR51B5             | 2.36 | 2.99 | 1.99 |
| OTTHUMG00000074607 | 2.36 | 2.81 | 2.09 |
| TRAJ7              | 2.36 | 3.52 | 1.81 |
| PSMA8              | 2.36 | 2.94 | 2.01 |
| OTTHUMG00000170013 | 2.36 | 2.59 | 2.14 |
| TECRL              | 2.36 | 3.03 | 1.96 |
| RNU1-17P           | 2.36 | 2.73 | 2.06 |
| HIST1H3H           | 2.36 | 3.39 | 1.54 |
| MIR4703            | 2.36 | 2.84 | 1.46 |
| MIR944             | 2.36 | 3.22 | 1.71 |
| FUNDC2P2           | 2.36 | 3.63 | 1.85 |
| OTTHUMG00000162711 | 2.35 | 2.67 | 2.05 |
| GNGT1              | 2.35 | 2.77 | 2.10 |
| CYP3A43            | 2.35 | 2.67 | 1.93 |
| OTTHUMG00000161118 | 2.35 | 2.73 | 2.04 |
| OTTHUMG00000153704 | 2.35 | 2.80 | 1.96 |
| KRTAP19-3          | 2.35 | 3.03 | 2.04 |
| OTTHUMG00000172835 | 2.35 | 3.68 | 1.70 |
| LOC729020          | 2.35 | 2.75 | 2.03 |
| MIR18B             | 2.35 | 2.84 | 1.82 |
| LOC100505863       | 2.35 | 2.69 | 2.01 |
| MEP1A              | 2.35 | 2.68 | 1.95 |
| OTTHUMG00000153111 | 2.35 | 2.63 | 2.08 |
| LOC100505609       | 2.35 | 2.78 | 1.92 |

|                    |      |      |      |
|--------------------|------|------|------|
| OTTHUMG00000155267 | 2.35 | 2.70 | 2.16 |
| EPGN               | 2.34 | 2.70 | 2.06 |
| OTTHUMG00000155012 | 2.34 | 2.61 | 1.82 |
| DEFB127            | 2.34 | 2.66 | 1.83 |
| MIR3142            | 2.34 | 2.87 | 1.79 |
| OTTHUMG00000015823 | 2.34 | 2.90 | 2.05 |
| CFHR3              | 2.34 | 3.08 | 1.67 |
| KRT26              | 2.34 | 3.46 | 2.00 |
| OTTHUMG00000167421 | 2.34 | 2.74 | 1.89 |
| SMPX               | 2.34 | 2.85 | 1.76 |
| OTTHUMG00000182829 | 2.34 | 2.81 | 1.73 |
| C10orf67           | 2.34 | 2.58 | 2.13 |
| ANKRD20A8P         | 2.34 | 2.81 | 2.08 |
| FAM72D             | 2.34 | 2.91 | 1.98 |
| LINC00323          | 2.34 | 2.75 | 1.82 |
| ANKRD26P1          | 2.34 | 3.06 | 2.05 |
| OTTHUMG00000153703 | 2.34 | 2.83 | 1.95 |
| OTTHUMG00000150951 | 2.34 | 2.49 | 2.11 |
| OTTHUMG00000162593 | 2.34 | 2.65 | 2.01 |
| OTTHUMG00000161916 | 2.34 | 2.81 | 2.04 |
| SERHL2             | 2.34 | 3.24 | 1.76 |
| ROPN1L-AS1         | 2.34 | 3.08 | 2.08 |
| MIR381             | 2.33 | 2.66 | 1.93 |
| HM13-IT1           | 2.33 | 2.93 | 1.92 |
| OTTHUMG00000041437 | 2.33 | 3.00 | 1.84 |
| OTTHUMG00000161125 | 2.33 | 2.75 | 2.08 |
| RNU7-30P           | 2.33 | 3.12 | 1.71 |
| AFM                | 2.33 | 2.66 | 2.06 |
| OR5M8              | 2.33 | 3.04 | 1.93 |
| OTTHUMG00000171940 | 2.33 | 2.71 | 2.13 |
| OTTHUMG00000180387 | 2.33 | 2.57 | 1.99 |
| OTTHUMG00000161226 | 2.33 | 2.94 | 2.02 |
| OTTHUMG00000163015 | 2.33 | 3.16 | 1.95 |
| RNA5SP239          | 2.33 | 3.32 | 1.76 |
| OTTHUMG00000078249 | 2.33 | 2.92 | 1.87 |
| MIRLET7A2          | 2.33 | 3.13 | 1.73 |
| LINC00254          | 2.33 | 2.82 | 1.92 |
| OTTHUMG00000014830 | 2.33 | 2.84 | 1.93 |
| OTTHUMG00000020080 | 2.33 | 2.86 | 1.70 |
| OTTHUMG00000166206 | 2.33 | 2.97 | 1.93 |
| OTTHUMG00000162873 | 2.33 | 2.84 | 1.99 |
| NDFIP2-AS1         | 2.33 | 2.95 | 1.92 |
| OTTHUMG00000157191 | 2.32 | 2.70 | 2.15 |
| SLC7A11-AS1        | 2.32 | 2.72 | 2.03 |
| MIR3616            | 2.32 | 2.92 | 2.02 |
| OTTHUMG00000162608 | 2.32 | 2.90 | 2.05 |
| OTTHUMG00000152616 | 2.32 | 2.64 | 1.99 |
| OTTHUMG00000169737 | 2.32 | 3.07 | 1.75 |
| OTTHUMG00000015068 | 2.32 | 2.75 | 1.86 |

|                    |      |      |      |
|--------------------|------|------|------|
| OTTHUMG00000166399 | 2.32 | 3.00 | 1.49 |
| NANOGP1            | 2.32 | 2.74 | 2.07 |
| OTTHUMG00000161747 | 2.32 | 2.75 | 1.68 |
| TEX11              | 2.32 | 2.70 | 2.08 |
| OTTHUMG00000152143 | 2.31 | 2.84 | 1.93 |
| REG1A              | 2.31 | 2.73 | 2.03 |
| NBPF7              | 2.31 | 2.73 | 1.84 |
| OTTHUMG00000160731 | 2.31 | 2.86 | 1.70 |
| OTTHUMG00000172467 | 2.31 | 3.11 | 1.66 |
| LOC100506050       | 2.31 | 3.05 | 2.02 |
| OTTHUMG00000008245 | 2.31 | 2.71 | 1.88 |
| OTTHUMG00000153369 | 2.31 | 2.61 | 1.97 |
| OTTHUMG00000152056 | 2.31 | 2.91 | 1.89 |
| NBPF22P            | 2.31 | 3.09 | 1.58 |
| GKN2               | 2.31 | 2.62 | 1.99 |
| LINC00871          | 2.31 | 2.63 | 1.99 |
| OTTHUMG00000163006 | 2.31 | 2.55 | 1.86 |
| OTTHUMG00000161649 | 2.31 | 2.49 | 2.07 |
| OTTHUMG00000162998 | 2.31 | 3.08 | 1.82 |
| OTTHUMG00000162351 | 2.31 | 2.74 | 1.92 |
| HIST1H2BJ          | 2.31 | 2.86 | 2.03 |
| OTTHUMG00000074548 | 2.31 | 2.79 | 2.01 |
| TRAV23DV6          | 2.30 | 2.64 | 1.97 |
| RNA5SP492          | 2.30 | 2.78 | 1.95 |
| OTTHUMG00000154585 | 2.30 | 2.71 | 2.00 |
| RNA5SP57           | 2.30 | 2.83 | 1.84 |
| OTTHUMG00000152845 | 2.30 | 2.68 | 1.79 |
| MIMT1              | 2.30 | 2.67 | 2.05 |
| OR1L8              | 2.30 | 2.94 | 1.96 |
| OR51I2             | 2.30 | 2.73 | 1.95 |
| MIR889             | 2.30 | 3.01 | 1.77 |
| EIF2S3L            | 2.30 | 3.18 | 1.87 |
| TRAV35             | 2.30 | 3.26 | 2.00 |
| OTTHUMG00000019544 | 2.30 | 2.52 | 2.11 |
| OTTHUMG00000164292 | 2.30 | 2.77 | 1.78 |
| OR5J2              | 2.30 | 2.59 | 1.90 |
| ZNF645             | 2.30 | 2.55 | 2.01 |
| MIR4460            | 2.30 | 2.92 | 1.67 |
| YY1P2              | 2.30 | 2.75 | 1.83 |
| OTTHUMG00000161799 | 2.30 | 2.80 | 1.85 |
| LINC00115          | 2.30 | 3.22 | 1.92 |
| OTTHUMG00000172355 | 2.30 | 2.67 | 2.04 |
| OTTHUMG00000158358 | 2.29 | 2.77 | 1.85 |
| LOC645434          | 2.29 | 2.55 | 2.00 |
| OTTHUMG00000017937 | 2.29 | 2.93 | 2.01 |
| OR5L1              | 2.29 | 2.64 | 1.82 |
| DEFA10P            | 2.29 | 2.53 | 2.05 |
| OTTHUMG00000155686 | 2.29 | 2.70 | 1.76 |
| PROL1              | 2.29 | 2.68 | 1.92 |

|                    |      |      |      |
|--------------------|------|------|------|
| RNA5SP127          | 2.29 | 2.50 | 1.87 |
| OR13C9             | 2.29 | 2.87 | 1.95 |
| RNY3P10            | 2.29 | 3.58 | 1.46 |
| OTTHUMG00000162105 | 2.29 | 2.59 | 2.00 |
| OTTHUMG00000161146 | 2.29 | 2.64 | 2.06 |
| SERPINB3           | 2.29 | 2.93 | 1.77 |
| KRTAP19-7          | 2.29 | 3.08 | 1.79 |
| OTTHUMG00000170693 | 2.29 | 2.73 | 2.01 |
| OTTHUMG00000162772 | 2.29 | 2.73 | 1.64 |
| OTC                | 2.29 | 2.43 | 1.99 |
| OTTHUMG00000078273 | 2.29 | 2.59 | 2.11 |
| LINC00690          | 2.29 | 3.06 | 1.98 |
| OTTHUMG00000164594 | 2.28 | 2.79 | 1.74 |
| SCP2D1             | 2.28 | 2.68 | 1.97 |
| RNA5SP174          | 2.28 | 2.82 | 1.85 |
| OTTHUMG00000032760 | 2.28 | 2.65 | 2.05 |
| RNU6-65            | 2.28 | 3.08 | 1.68 |
| MIR4307            | 2.28 | 3.83 | 1.75 |
| OTTHUMG00000015096 | 2.28 | 3.11 | 1.95 |
| OTTHUMG00000164155 | 2.28 | 2.83 | 1.96 |
| TAAR2              | 2.28 | 2.73 | 2.04 |
| OR10H2             | 2.28 | 2.71 | 1.92 |
| OTTHUMG00000162807 | 2.28 | 2.78 | 1.92 |
| MIR4773-2          | 2.28 | 2.72 | 1.90 |
| OTTHUMG00000163874 | 2.28 | 3.01 | 1.82 |
| MIR4317            | 2.28 | 3.14 | 1.46 |
| LINC00347          | 2.28 | 2.82 | 1.96 |
| CELP               | 2.28 | 2.67 | 1.99 |
| MIR4699            | 2.28 | 2.78 | 2.01 |
| MAGI2-AS2          | 2.28 | 3.09 | 2.02 |
| OTTHUMG00000151905 | 2.28 | 2.54 | 2.00 |
| OTTHUMG00000041126 | 2.28 | 2.50 | 2.00 |
| MIR642B            | 2.28 | 3.43 | 1.30 |
| IGLJ6              | 2.27 | 2.82 | 1.94 |
| OTTHUMG00000152631 | 2.27 | 2.61 | 1.92 |
| ANP32C             | 2.27 | 2.91 | 1.73 |
| MIR3177            | 2.27 | 2.42 | 2.11 |
| OTTHUMG00000017369 | 2.27 | 2.99 | 1.86 |
| OTTHUMG00000039495 | 2.27 | 2.75 | 1.93 |
| OTTHUMG00000017117 | 2.27 | 2.55 | 2.04 |
| OTTHUMG00000170122 | 2.27 | 2.68 | 1.84 |
| LOC100996267       | 2.27 | 2.56 | 1.99 |
| OTTHUMG00000017173 | 2.27 | 2.56 | 1.97 |
| OTTHUMG00000170010 | 2.27 | 2.62 | 1.90 |
| SCEL-AS1           | 2.27 | 3.11 | 1.81 |
| EMCN-IT3           | 2.27 | 2.50 | 2.04 |
| PNLIPRP3           | 2.27 | 2.65 | 1.98 |
| OTTHUMG00000167628 | 2.27 | 2.97 | 1.60 |
| OTTHUMG00000177911 | 2.27 | 3.08 | 1.77 |



|                    |      |      |      |
|--------------------|------|------|------|
| CYP4Z2P            | 2.27 | 3.02 | 1.81 |
| KRTAP4-7           | 2.27 | 3.08 | 1.47 |
| CNGA1              | 2.27 | 2.54 | 2.03 |
| OTTHUMG00000162995 | 2.27 | 2.64 | 1.83 |
| ZNF729             | 2.26 | 2.80 | 1.68 |
| DEPDC4             | 2.26 | 2.43 | 2.06 |
| OTTHUMG00000162778 | 2.26 | 2.89 | 1.81 |
| TAS2R43            | 2.26 | 3.24 | 1.48 |
| OTTHUMG00000021149 | 2.26 | 2.68 | 1.81 |
| OTTHUMG00000152853 | 2.26 | 2.53 | 1.91 |
| IGLV6-57           | 2.26 | 2.86 | 1.71 |
| FAM86JP            | 2.26 | 2.91 | 1.81 |
| MIR4684            | 2.26 | 2.89 | 1.78 |
| RNA5SP125          | 2.26 | 3.06 | 1.79 |
| OTTHUMG00000160185 | 2.26 | 2.76 | 2.00 |
| MIR4668            | 2.26 | 3.01 | 1.71 |
| OTTHUMG00000014831 | 2.26 | 2.96 | 1.76 |
| OTTHUMG00000164828 | 2.26 | 2.44 | 1.97 |
| LOC100128317       | 2.26 | 2.81 | 1.97 |
| IFNA16             | 2.26 | 2.76 | 1.92 |
| OTTHUMG00000166370 | 2.25 | 2.64 | 2.01 |
| ADAT3              | 2.25 | 2.54 | 1.92 |
| OTTHUMG00000154543 | 2.25 | 2.62 | 1.94 |
| LINC00395          | 2.25 | 2.75 | 2.02 |
| TGIF2LY            | 2.25 | 2.80 | 1.79 |
| OR4F4              | 2.25 | 3.28 | 1.79 |
| HIST1H1B           | 2.25 | 2.84 | 1.55 |
| RNA5SP336          | 2.25 | 2.93 | 1.49 |
| OTTHUMG00000153056 | 2.25 | 2.79 | 1.79 |
| CRSP8P             | 2.25 | 2.98 | 1.73 |
| DNAJB3             | 2.25 | 3.09 | 1.62 |
| MIR128-1           | 2.25 | 2.77 | 1.77 |
| KLRC3              | 2.25 | 3.03 | 1.80 |
| MIR200C            | 2.25 | 3.15 | 1.57 |
| USP17L3            | 2.25 | 3.14 | 1.64 |
| OTTHUMG00000008095 | 2.25 | 2.78 | 1.81 |
| OTTHUMG00000152139 | 2.25 | 2.77 | 1.96 |
| PLSCR5-AS1         | 2.25 | 2.89 | 1.89 |
| LRRIQ4             | 2.25 | 3.07 | 1.95 |
| OTTHUMG00000151402 | 2.25 | 2.67 | 1.90 |
| PABPC3             | 2.24 | 3.02 | 1.65 |
| UBE2U              | 2.24 | 2.56 | 1.99 |
| CLDN17             | 2.24 | 2.68 | 1.86 |
| MIR1278            | 2.24 | 2.71 | 1.86 |
| MBD3L1             | 2.24 | 2.92 | 1.97 |
| LOC100507274       | 2.24 | 2.80 | 2.03 |
| OR5AR1             | 2.24 | 2.79 | 2.02 |
| MIR1262            | 2.24 | 2.86 | 1.59 |
| OTTHUMG00000168857 | 2.24 | 2.70 | 1.80 |

|                    |      |      |      |
|--------------------|------|------|------|
| DEFA3              | 2.24 | 3.26 | 1.75 |
| SLCO1B3            | 2.24 | 2.61 | 1.84 |
| OTTHUMG00000009114 | 2.24 | 2.69 | 1.87 |
| MIR302A            | 2.24 | 2.95 | 1.82 |
| MSMB               | 2.24 | 2.90 | 1.98 |
| OTTHUMG00000017336 | 2.24 | 2.82 | 1.69 |
| RNA5SP481          | 2.24 | 2.95 | 1.92 |
| PRB4               | 2.24 | 3.82 | 1.78 |
| SERPINB4           | 2.24 | 3.00 | 1.77 |
| RN7SKP5            | 2.24 | 2.94 | 1.75 |
| LINC00604          | 2.24 | 2.37 | 2.01 |
| MIR4714            | 2.24 | 3.02 | 1.83 |
| OTTHUMG00000153051 | 2.23 | 2.80 | 1.76 |
| MIR676             | 2.23 | 2.88 | 1.77 |
| CCDC152            | 2.23 | 2.79 | 1.85 |
| SNORD72            | 2.23 | 3.83 | 1.35 |
| RNU7-88P           | 2.23 | 2.94 | 1.80 |
| OSTN               | 2.23 | 2.76 | 1.76 |
| MSH4               | 2.23 | 2.60 | 1.95 |
| SERPINB13          | 2.23 | 2.85 | 1.92 |
| SNORD105           | 2.23 | 2.79 | 1.67 |
| KLRF2              | 2.23 | 2.87 | 1.94 |
| OTTHUMG00000172323 | 2.23 | 2.82 | 1.79 |
| OR52E8             | 2.23 | 3.24 | 1.70 |
| OTTHUMG00000017094 | 2.23 | 2.84 | 1.75 |
| OTTHUMG00000161780 | 2.23 | 2.61 | 1.94 |
| SYCP1              | 2.23 | 2.41 | 1.98 |
| RXFP1              | 2.23 | 2.66 | 1.96 |
| PER4               | 2.23 | 2.57 | 1.90 |
| OR52K2             | 2.22 | 2.90 | 1.81 |
| FOLH1B             | 2.22 | 2.91 | 1.68 |
| OR6C70             | 2.22 | 2.71 | 1.87 |
| LOC100288208       | 2.22 | 2.84 | 1.91 |
| IGKV1D-42          | 2.22 | 2.95 | 1.74 |
| OTTHUMG00000152747 | 2.22 | 2.44 | 2.03 |
| MIR410             | 2.22 | 2.55 | 1.95 |
| OTTHUMG00000163317 | 2.22 | 3.42 | 1.73 |
| OR1L3              | 2.22 | 2.73 | 1.57 |
| RNA5SP176          | 2.22 | 3.23 | 1.65 |
| OTTHUMG00000017809 | 2.22 | 2.71 | 1.79 |
| OTTHUMG00000021532 | 2.22 | 2.66 | 1.87 |
| TRBV7-8            | 2.22 | 2.72 | 1.59 |
| CD200R1L           | 2.22 | 2.53 | 1.97 |
| NRG1-IT3           | 2.22 | 2.83 | 1.71 |
| OR5H2              | 2.22 | 2.70 | 1.80 |
| OR4C3              | 2.22 | 2.76 | 1.77 |
| SCARNA15           | 2.22 | 2.67 | 1.59 |
| LOC100505946       | 2.22 | 2.72 | 1.65 |
| OTTHUMG00000159060 | 2.22 | 2.73 | 1.88 |

|                    |      |      |      |
|--------------------|------|------|------|
| OTTHUMG00000162604 | 2.22 | 2.55 | 1.96 |
| OTTHUMG00000155315 | 2.22 | 2.61 | 1.84 |
| MIR520C            | 2.21 | 2.95 | 1.79 |
| OTTHUMG00000067507 | 2.21 | 2.89 | 1.74 |
| PIPSL              | 2.21 | 3.19 | 1.23 |
| MIR1206            | 2.21 | 3.27 | 1.34 |
| KRTAP19-6          | 2.21 | 2.64 | 1.93 |
| LINC00889          | 2.21 | 2.78 | 1.80 |
| SI                 | 2.21 | 2.63 | 2.01 |
| LOC340107          | 2.21 | 2.58 | 1.93 |
| RNA5SP277          | 2.21 | 2.87 | 1.63 |
| MIR493             | 2.21 | 3.15 | 1.77 |
| SYT14L             | 2.21 | 2.64 | 1.58 |
| KRTAP22-1          | 2.21 | 2.83 | 1.89 |
| MIR491             | 2.21 | 2.83 | 1.97 |
| IGKV2D-26          | 2.21 | 2.58 | 1.66 |
| FAM223B            | 2.21 | 2.94 | 1.44 |
| OR2AK2             | 2.21 | 2.58 | 1.99 |
| CCDC172            | 2.21 | 2.85 | 1.88 |
| OTTHUMG00000165230 | 2.21 | 2.86 | 1.61 |
| IFNA17             | 2.21 | 2.89 | 1.85 |
| OTTHUMG00000163914 | 2.21 | 2.41 | 1.89 |
| OTTHUMG00000153044 | 2.21 | 2.81 | 1.78 |
| OTTHUMG00000169476 | 2.21 | 2.59 | 1.98 |
| OTTHUMG00000159128 | 2.21 | 2.70 | 1.79 |
| OTTHUMG00000176580 | 2.21 | 2.63 | 1.90 |
| OR2AG2             | 2.21 | 2.52 | 1.86 |
| OTTHUMG00000164839 | 2.21 | 2.59 | 1.90 |
| OTTHUMG00000172481 | 2.21 | 2.72 | 1.79 |
| RPL13AP3           | 2.21 | 2.64 | 1.90 |
| LOC729968          | 2.21 | 3.21 | 1.77 |
| LINC00599          | 2.21 | 2.93 | 1.83 |
| OTTHUMG00000156067 | 2.20 | 2.61 | 1.74 |
| C10orf115          | 2.20 | 2.45 | 1.82 |
| CFHR4              | 2.20 | 3.09 | 1.72 |
| MIR208A            | 2.20 | 2.75 | 1.88 |
| OTTHUMG00000035229 | 2.20 | 2.74 | 1.78 |
| HS3ST6             | 2.20 | 2.66 | 1.74 |
| OTTHUMG00000009218 | 2.20 | 2.68 | 1.90 |
| RNA5SP369          | 2.20 | 3.15 | 1.59 |
| OTTHUMG00000168501 | 2.20 | 2.87 | 1.75 |
| MIR216B            | 2.20 | 2.49 | 1.95 |
| TRAJ42             | 2.20 | 2.69 | 1.76 |
| ADAM3A             | 2.20 | 2.42 | 1.94 |
| OTTHUMG00000022220 | 2.20 | 2.48 | 1.94 |
| PPP1R42            | 2.20 | 2.66 | 1.98 |
| MIR567             | 2.20 | 2.84 | 1.92 |
| RN7SKP10           | 2.20 | 2.59 | 1.80 |
| IGLV11-55          | 2.20 | 2.64 | 1.89 |

|                    |      |      |      |
|--------------------|------|------|------|
| MIR300             | 2.19 | 3.59 | 1.65 |
| OTTHUMG00000015045 | 2.19 | 2.68 | 1.97 |
| OR5P2              | 2.19 | 2.64 | 1.85 |
| OTTHUMG00000162457 | 2.19 | 2.67 | 1.89 |
| LOC100506122       | 2.19 | 2.83 | 1.96 |
| OTTHUMG00000164616 | 2.19 | 2.43 | 1.96 |
| OTTHUMG00000164283 | 2.19 | 2.70 | 1.80 |
| SULT6B1            | 2.19 | 2.56 | 1.92 |
| OTTHUMG00000162794 | 2.19 | 2.79 | 1.81 |
| OTTHUMG00000172483 | 2.19 | 2.76 | 1.87 |
| MIR320B2           | 2.19 | 2.76 | 1.85 |
| MIR4779            | 2.19 | 2.59 | 1.93 |
| OTTHUMG00000014829 | 2.19 | 2.88 | 1.91 |
| OTTHUMG00000015659 | 2.19 | 2.56 | 1.76 |
| OTTHUMG00000171368 | 2.19 | 2.96 | 1.71 |
| OTTHUMG00000151921 | 2.19 | 2.39 | 2.00 |
| OTTHUMG00000161209 | 2.19 | 3.47 | 1.53 |
| LINC00879          | 2.18 | 2.60 | 1.86 |
| RNA5SP376          | 2.18 | 2.64 | 1.64 |
| LOC100506489       | 2.18 | 2.46 | 1.86 |
| C1orf141           | 2.18 | 2.64 | 1.88 |
| OTTHUMG00000171617 | 2.18 | 2.51 | 1.82 |
| OTTHUMG00000158840 | 2.18 | 2.51 | 1.76 |
| OTTHUMG00000170350 | 2.18 | 2.77 | 1.86 |
| RNA5SP179          | 2.18 | 2.99 | 1.76 |
| OTTHUMG00000171350 | 2.18 | 2.90 | 1.81 |
| RNU5B-4P           | 2.18 | 2.80 | 1.61 |
| EDDM3A             | 2.18 | 2.62 | 1.87 |
| OTTHUMG00000163190 | 2.18 | 2.87 | 1.53 |
| OTTHUMG00000164644 | 2.18 | 2.58 | 1.89 |
| RBMV3AP            | 2.18 | 3.07 | 1.77 |
| OTTHUMG00000161243 | 2.18 | 2.77 | 1.64 |
| RNA5SP382          | 2.17 | 3.18 | 1.50 |
| MIR516B2           | 2.17 | 3.18 | 1.48 |
| TRAV36DV7          | 2.17 | 3.27 | 1.76 |
| OR5B3              | 2.17 | 3.18 | 1.55 |
| LINC00351          | 2.17 | 2.63 | 1.87 |
| RNA5SP280          | 2.17 | 2.56 | 1.75 |
| OTTHUMG00000078245 | 2.17 | 2.63 | 1.71 |
| RNA5SP516          | 2.17 | 2.82 | 1.67 |
| CXorf58            | 2.17 | 2.56 | 1.86 |
| OTTHUMG00000013087 | 2.17 | 2.51 | 1.69 |
| SPANXN2            | 2.17 | 2.46 | 1.90 |
| KRTAP22-2          | 2.17 | 2.81 | 1.82 |
| OTTHUMG00000032470 | 2.17 | 2.84 | 1.84 |
| PCDH9-AS2          | 2.17 | 2.73 | 1.83 |
| OR4D6              | 2.16 | 2.75 | 1.65 |
| LOC100507513       | 2.16 | 2.64 | 1.89 |
| CES5AP1            | 2.16 | 2.56 | 1.86 |

|                     |      |      |      |
|---------------------|------|------|------|
| MIR132              | 2.16 | 2.49 | 1.79 |
| LIP1                | 2.16 | 2.53 | 1.92 |
| ARHGAP31-AS1        | 2.16 | 2.45 | 1.90 |
| OTTHUMG00000032680  | 2.16 | 2.68 | 1.70 |
| OTTHUMG000000169921 | 2.16 | 2.43 | 1.89 |
| TAAR8               | 2.16 | 2.49 | 1.78 |
| OTTHUMG000000152558 | 2.16 | 2.45 | 1.97 |
| CYP2C19             | 2.16 | 2.38 | 1.83 |
| OTTHUMG00000010769  | 2.16 | 2.61 | 1.71 |
| MIR363              | 2.16 | 2.84 | 1.68 |
| OTTHUMG000000158994 | 2.16 | 2.58 | 1.87 |
| MIR4770             | 2.15 | 2.95 | 1.57 |
| MIR4643             | 2.15 | 3.21 | 1.66 |
| OTTHUMG000000165488 | 2.15 | 2.55 | 1.95 |
| MIR520A             | 2.15 | 2.68 | 1.62 |
| CSF2                | 2.15 | 2.33 | 1.94 |
| OTTHUMG000000177334 | 2.15 | 2.66 | 1.76 |
| OTTHUMG000000150865 | 2.15 | 2.40 | 1.61 |
| CST1                | 2.15 | 2.86 | 1.68 |
| UGT2A1              | 2.15 | 2.78 | 2.00 |
| OTTHUMG000000163671 | 2.15 | 2.78 | 1.80 |
| HHLA2               | 2.15 | 2.75 | 1.85 |
| OTTHUMG000000166245 | 2.15 | 2.41 | 1.79 |
| OR10G4              | 2.15 | 2.85 | 1.60 |
| OTTHUMG000000162592 | 2.15 | 2.74 | 1.66 |
| OTTHUMG000000171640 | 2.15 | 2.97 | 1.53 |
| RNA5-8SP5           | 2.14 | 2.77 | 1.70 |
| OTTHUMG000000074314 | 2.14 | 2.89 | 1.78 |
| OR4C11              | 2.14 | 2.50 | 1.74 |
| MIA2                | 2.14 | 2.57 | 1.75 |
| OTTHUMG000000043433 | 2.14 | 2.84 | 1.46 |
| OTTHUMG000000018047 | 2.14 | 2.51 | 1.46 |
| MIR4794             | 2.14 | 2.86 | 1.19 |
| OTTHUMG000000019566 | 2.14 | 2.58 | 1.75 |
| RXFP2               | 2.14 | 2.31 | 1.88 |
| SNORD85             | 2.14 | 2.51 | 1.87 |
| OTTHUMG000000163549 | 2.14 | 2.36 | 1.89 |
| MIR320B1            | 2.14 | 2.65 | 1.82 |
| OTTHUMG000000161427 | 2.14 | 2.98 | 1.49 |
| LOC152225           | 2.14 | 2.33 | 1.91 |
| LINC00381           | 2.14 | 2.48 | 1.91 |
| OTTHUMG000000163152 | 2.14 | 2.53 | 1.74 |
| MIR3943             | 2.14 | 2.62 | 1.77 |
| OR4K1               | 2.14 | 3.19 | 1.74 |
| HPVC1               | 2.13 | 2.58 | 1.77 |
| RNU7-34P            | 2.13 | 3.48 | 1.31 |
| OTTHUMG000000035526 | 2.13 | 2.56 | 1.94 |
| RNA5SP287           | 2.13 | 2.98 | 1.72 |
| OTTHUMG000000159498 | 2.13 | 2.63 | 1.75 |

|                    |      |      |      |
|--------------------|------|------|------|
| ICOS               | 2.13 | 2.42 | 1.78 |
| LINC00500          | 2.13 | 2.70 | 1.83 |
| OTTHUMG00000162774 | 2.13 | 2.47 | 1.94 |
| RNA5SP464          | 2.13 | 2.56 | 1.82 |
| OTTHUMG00000168421 | 2.13 | 2.66 | 1.62 |
| RNA5SP480          | 2.13 | 2.75 | 1.66 |
| FLJ16124           | 2.13 | 2.80 | 1.70 |
| DMD-AS3            | 2.13 | 2.43 | 1.84 |
| OTTHUMG00000160872 | 2.13 | 2.59 | 1.73 |
| OTTHUMG00000153756 | 2.13 | 2.94 | 1.56 |
| OTTHUMG00000067120 | 2.13 | 2.83 | 1.59 |
| OTTHUMG00000162382 | 2.13 | 2.53 | 1.83 |
| SNORA36C           | 2.13 | 2.57 | 1.87 |
| TTY12              | 2.13 | 2.47 | 1.62 |
| OTTHUMG00000151707 | 2.13 | 2.59 | 1.81 |
| CCDC178            | 2.13 | 2.37 | 1.80 |
| OR6C1              | 2.13 | 2.61 | 1.72 |
| OTTHUMG00000151710 | 2.13 | 2.33 | 1.78 |
| OTTHUMG00000160994 | 2.13 | 2.38 | 1.65 |
| DDX53              | 2.13 | 2.73 | 1.79 |
| MIR409             | 2.13 | 2.40 | 1.82 |
| MIR548T            | 2.13 | 2.55 | 1.61 |
| MIR548AD           | 2.13 | 3.56 | 1.40 |
| IGHA1              | 2.13 | 2.91 | 1.58 |
| RNA5SP267          | 2.12 | 3.24 | 1.40 |
| MIR4774            | 2.12 | 2.70 | 1.60 |
| MIR329-2           | 2.12 | 3.16 | 1.65 |
| MIR4266            | 2.12 | 3.76 | 1.20 |
| OTTHUMG00000162579 | 2.12 | 2.90 | 1.83 |
| MIR4696            | 2.12 | 3.20 | 1.80 |
| MIR1283-2          | 2.12 | 2.50 | 1.59 |
| OTTHUMG00000014906 | 2.12 | 3.20 | 1.69 |
| KRTAP9-7           | 2.12 | 2.75 | 1.59 |
| OTTHUMG00000154195 | 2.12 | 2.41 | 1.75 |
| OTTHUMG00000171383 | 2.12 | 2.77 | 1.52 |
| MIR432             | 2.12 | 2.57 | 1.90 |
| OTTHUMG00000167378 | 2.12 | 2.64 | 1.82 |
| RNA5SP504          | 2.12 | 2.62 | 1.55 |
| ANKRD18B           | 2.12 | 2.53 | 1.74 |
| FLRT3              | 2.12 | 2.34 | 1.84 |
| OR8J1              | 2.12 | 3.22 | 1.58 |
| KRTAP21-3          | 2.12 | 2.77 | 1.78 |
| IL23A              | 2.12 | 2.75 | 1.66 |
| SPANXN3            | 2.12 | 2.53 | 1.88 |
| MIR655             | 2.11 | 3.07 | 1.77 |
| OTTHUMG00000151358 | 2.11 | 2.52 | 1.59 |
| OTTHUMG00000020021 | 2.11 | 2.30 | 1.72 |
| GRM5-AS1           | 2.11 | 2.52 | 1.88 |
| OR4A16             | 2.11 | 2.83 | 1.71 |

|                     |      |      |      |
|---------------------|------|------|------|
| OTTHUMG00000010017  | 2.11 | 2.34 | 1.81 |
| FMO9P               | 2.11 | 2.52 | 1.79 |
| S100G               | 2.11 | 2.33 | 1.85 |
| OTTHUMG00000017657  | 2.11 | 2.54 | 1.78 |
| SSMEM1              | 2.11 | 2.52 | 1.62 |
| MIR219-1            | 2.11 | 2.39 | 1.81 |
| CFHR1               | 2.11 | 2.83 | 1.74 |
| OR4F21              | 2.11 | 3.09 | 1.39 |
| OTTHUMG000000160395 | 2.10 | 2.42 | 1.85 |
| OTTHUMG000000163750 | 2.10 | 2.35 | 1.72 |
| LOC100507498        | 2.10 | 2.41 | 1.87 |
| OTTHUMG000000152267 | 2.10 | 2.57 | 1.85 |
| OR52H1              | 2.10 | 2.47 | 1.86 |
| MIR3660             | 2.10 | 3.20 | 1.43 |
| OTTHUMG000000153651 | 2.10 | 2.79 | 1.61 |
| OTTHUMG000000153856 | 2.10 | 2.46 | 1.80 |
| MIR133A1            | 2.10 | 2.74 | 1.74 |
| OR5H14              | 2.10 | 2.48 | 1.79 |
| OTTHUMG00000015791  | 2.10 | 2.43 | 1.70 |
| OTTHUMG00000008243  | 2.10 | 2.32 | 1.72 |
| SNORD111B           | 2.10 | 3.06 | 1.50 |
| OTTHUMG000000074542 | 2.10 | 2.42 | 1.82 |
| MIR372              | 2.09 | 2.44 | 1.79 |
| OTTHUMG000000162339 | 2.09 | 2.77 | 1.73 |
| TCEAL3-AS1          | 2.09 | 2.48 | 1.70 |
| OTTHUMG000000162230 | 2.09 | 2.54 | 1.87 |
| MAPT-AS1            | 2.09 | 3.12 | 1.69 |
| MIR514B             | 2.09 | 2.79 | 1.51 |
| OTTHUMG00000014978  | 2.09 | 2.88 | 1.80 |
| FGG                 | 2.09 | 2.46 | 1.78 |
| TMEM257             | 2.09 | 2.42 | 1.94 |
| SCGB1D1             | 2.09 | 2.54 | 1.69 |
| LINC00613           | 2.09 | 2.70 | 1.69 |
| PCDH11X             | 2.09 | 2.50 | 1.60 |
| MIR3158-2           | 2.09 | 2.75 | 1.53 |
| IFNE                | 2.09 | 2.95 | 1.68 |
| GDF3                | 2.09 | 2.45 | 1.69 |
| OTTHUMG000000160989 | 2.09 | 2.46 | 1.76 |
| OTTHUMG000000161553 | 2.09 | 2.83 | 1.65 |
| RNA5SP264           | 2.09 | 2.59 | 1.69 |
| MIR499B             | 2.08 | 2.50 | 1.73 |
| WTH3DI              | 2.08 | 2.60 | 1.53 |
| OTTHUMG000000163009 | 2.08 | 2.68 | 1.71 |
| LINC00301           | 2.08 | 2.34 | 1.86 |
| LOC100506926        | 2.08 | 2.80 | 1.78 |
| OTTHUMG000000166487 | 2.08 | 2.34 | 1.86 |
| IFNA1               | 2.08 | 2.68 | 1.80 |
| OTTHUMG000000160648 | 2.08 | 2.48 | 1.66 |
| MIR136              | 2.08 | 2.94 | 1.53 |

|                    |      |      |      |
|--------------------|------|------|------|
| MIR1321            | 2.08 | 2.95 | 1.44 |
| TRNAI6             | 2.08 | 2.53 | 1.63 |
| MIR3121            | 2.08 | 2.50 | 1.77 |
| OTTHUMG00000154472 | 2.08 | 2.72 | 1.75 |
| MIR510             | 2.08 | 2.65 | 1.57 |
| HYALP1             | 2.08 | 2.59 | 1.66 |
| OTTHUMG00000152392 | 2.08 | 2.54 | 1.68 |
| MIR4264            | 2.07 | 3.03 | 1.65 |
| STATH              | 2.07 | 2.52 | 1.58 |
| OTTHUMG00000166488 | 2.07 | 2.42 | 1.82 |
| TRAV7              | 2.07 | 3.10 | 1.33 |
| OTTHUMG00000152141 | 2.07 | 2.81 | 1.67 |
| UOX                | 2.07 | 2.56 | 1.76 |
| HMSD               | 2.07 | 2.34 | 1.75 |
| OTTHUMG00000163624 | 2.07 | 2.45 | 1.77 |
| IGHV3-53           | 2.07 | 2.84 | 1.55 |
| LOC284825          | 2.07 | 2.35 | 1.82 |
| AMMECR1-IT1        | 2.07 | 2.22 | 1.82 |
| MTRNR2L5           | 2.07 | 2.68 | 1.67 |
| OTTHUMG00000166293 | 2.07 | 2.62 | 1.73 |
| OTTHUMG00000169639 | 2.07 | 2.59 | 1.66 |
| SNORD121A          | 2.06 | 3.23 | 1.69 |
| ZNF847P            | 2.06 | 2.94 | 1.61 |
| OTTHUMG00000020138 | 2.06 | 2.66 | 1.74 |
| OTTHUMG00000170564 | 2.06 | 2.39 | 1.89 |
| MIR122             | 2.06 | 2.51 | 1.82 |
| OTTHUMG00000009790 | 2.06 | 2.68 | 1.71 |
| PLSCR5             | 2.06 | 2.59 | 1.76 |
| CABS1              | 2.06 | 2.31 | 1.86 |
| SEMG1              | 2.06 | 2.41 | 1.64 |
| OTTHUMG00000014979 | 2.06 | 2.37 | 1.62 |
| RNA5SP249          | 2.06 | 2.79 | 1.62 |
| OTTHUMG00000161192 | 2.06 | 2.47 | 1.59 |
| HBZ                | 2.06 | 2.42 | 1.79 |
| MIR4645            | 2.06 | 2.57 | 1.68 |
| STT3A-AS1          | 2.06 | 2.33 | 1.71 |
| RBM11              | 2.06 | 2.21 | 1.85 |
| OTTHUMG00000153055 | 2.06 | 2.46 | 1.77 |
| LOC100507134       | 2.06 | 2.84 | 1.65 |
| OTTHUMG00000166378 | 2.06 | 2.45 | 1.72 |
| CAPZA3             | 2.06 | 2.50 | 1.85 |
| OTTHUMG00000159435 | 2.06 | 2.34 | 1.84 |
| OR2B3              | 2.05 | 2.49 | 1.72 |
| ADAM21P1           | 2.05 | 2.79 | 1.60 |
| OTTHUMG00000017165 | 2.05 | 2.44 | 1.71 |
| MIR376B            | 2.05 | 3.30 | 1.49 |
| LINC00644          | 2.05 | 2.33 | 1.77 |
| OTTHUMG00000161396 | 2.05 | 2.27 | 1.46 |
| MIR4498            | 2.05 | 2.47 | 1.67 |



|                    |      |      |      |
|--------------------|------|------|------|
| ASZ1               | 2.05 | 2.47 | 1.77 |
| OTTHUMG00000163862 | 2.05 | 2.43 | 1.86 |
| OR9A4              | 2.05 | 3.31 | 1.68 |
| OTTHUMG00000161695 | 2.05 | 2.26 | 1.76 |
| FGF12-AS3          | 2.04 | 2.23 | 1.77 |
| MS4A13             | 2.04 | 2.47 | 1.75 |
| OTTHUMG00000163012 | 2.04 | 2.74 | 1.77 |
| FAM71C             | 2.04 | 2.40 | 1.64 |
| OTTHUMG00000155841 | 2.04 | 2.39 | 1.56 |
| OTTHUMG00000162497 | 2.04 | 2.48 | 1.56 |
| MIR181A1           | 2.04 | 2.42 | 1.70 |
| STOX1              | 2.04 | 2.34 | 1.79 |
| MIR4524A           | 2.04 | 3.09 | 1.35 |
| SNORD116-24        | 2.04 | 2.99 | 1.36 |
| OTTHUMG00000017562 | 2.04 | 2.46 | 1.70 |
| RNA5SP252          | 2.04 | 2.60 | 1.72 |
| OTTHUMG00000017016 | 2.04 | 2.22 | 1.58 |
| RASSF6             | 2.04 | 2.46 | 1.70 |
| TRGV11             | 2.04 | 2.34 | 1.87 |
| MIR4463            | 2.04 | 2.87 | 1.55 |
| IQCF2              | 2.04 | 2.47 | 1.63 |
| OTTHUMG00000160708 | 2.04 | 2.71 | 1.77 |
| OTTHUMG00000037783 | 2.04 | 2.86 | 1.67 |
| MIR4276            | 2.04 | 2.90 | 1.50 |
| RNU5B-1            | 2.04 | 3.01 | 1.34 |
| OTTHUMG00000017755 | 2.04 | 2.38 | 1.63 |
| MIR4282            | 2.04 | 2.80 | 1.19 |
| MTRNR2L9           | 2.03 | 2.60 | 1.47 |
| OTTHUMG00000163223 | 2.03 | 2.32 | 1.77 |
| POU3F4             | 2.03 | 2.56 | 1.75 |
| RNA5SP436          | 2.03 | 2.81 | 1.43 |
| LINC00621          | 2.03 | 2.55 | 1.46 |
| OTTHUMG00000171353 | 2.03 | 2.41 | 1.78 |
| OTTHUMG00000035685 | 2.03 | 2.44 | 1.70 |
| MIR1275            | 2.03 | 2.66 | 1.54 |
| OTTHUMG00000162786 | 2.03 | 2.69 | 1.58 |
| OTTHUMG00000011003 | 2.03 | 2.32 | 1.56 |
| OR6K6              | 2.03 | 2.36 | 1.67 |
| MIR620             | 2.03 | 2.55 | 1.35 |
| OTTHUMG00000162210 | 2.03 | 2.39 | 1.59 |
| ANKRD62P1-PARP4P3  | 2.03 | 2.37 | 1.64 |
| OTTHUMG00000170331 | 2.03 | 2.25 | 1.73 |
| MIR33A             | 2.03 | 2.85 | 1.65 |
| CDKL4              | 2.02 | 2.55 | 1.76 |
| RNU6-77            | 2.02 | 2.88 | 1.14 |
| TRBV30             | 2.02 | 2.44 | 1.67 |
| MIR144             | 2.02 | 2.84 | 1.67 |
| LOC644145          | 2.02 | 2.57 | 1.46 |
| FABP2              | 2.02 | 2.18 | 1.76 |

|                    |      |      |      |
|--------------------|------|------|------|
| OR52L1             | 2.02 | 2.28 | 1.62 |
| LIPJ               | 2.02 | 2.24 | 1.74 |
| SPIC               | 2.02 | 2.90 | 1.58 |
| TRBV6-8            | 2.02 | 2.91 | 1.74 |
| UGT2B11            | 2.02 | 3.03 | 1.23 |
| PTH                | 2.02 | 2.35 | 1.73 |
| OTTHUMG00000161766 | 2.01 | 2.31 | 1.73 |
| EMCN-IT1           | 2.01 | 2.38 | 1.67 |
| RAET1K             | 2.01 | 2.43 | 1.61 |
| OTTHUMG00000158756 | 2.01 | 2.30 | 1.70 |
| OTTHUMG00000019550 | 2.01 | 2.25 | 1.70 |
| GPC5-IT1           | 2.01 | 3.15 | 1.52 |
| OTTHUMG00000170416 | 2.01 | 2.52 | 1.60 |
| LOC728755          | 2.01 | 2.46 | 1.52 |
| OR5D13             | 2.01 | 2.34 | 1.77 |
| SSX5               | 2.01 | 2.79 | 1.51 |
| CTAGE10P           | 2.01 | 2.35 | 1.53 |
| RNA5SP458          | 2.01 | 2.46 | 1.74 |
| LINC00446          | 2.01 | 2.43 | 1.60 |
| LRRIQ3             | 2.01 | 2.50 | 1.80 |
| SPANXN5            | 2.01 | 2.78 | 1.38 |
| EFCAB9             | 2.01 | 2.71 | 1.54 |
| MIR3612            | 2.01 | 2.97 | 1.53 |
| OTTHUMG00000160923 | 2.01 | 2.43 | 1.67 |
| RNA5SP324          | 2.01 | 2.45 | 1.45 |
| OTTHUMG00000018257 | 2.01 | 2.66 | 1.74 |
| RNU4-6P            | 2.01 | 2.75 | 1.54 |
| LOC201651          | 2.01 | 2.42 | 1.81 |
| IFNA7              | 2.00 | 3.22 | 1.43 |
| PRB3               | 2.00 | 2.64 | 1.54 |
| CXorf30            | 2.00 | 2.21 | 1.70 |
| OR1L6              | 2.00 | 2.47 | 1.64 |
| OTTHUMG00000015558 | 2.00 | 2.58 | 1.59 |
| OTTHUMG00000161221 | 2.00 | 2.45 | 1.55 |
| SNORD115-31        | 2.00 | 2.99 | 1.49 |
| OTTHUMG00000078122 | 2.00 | 2.42 | 1.48 |
| SNORD115-41        | 2.00 | 2.57 | 1.36 |
| OTTHUMG00000154344 | 2.00 | 2.26 | 1.49 |
| OTTHUMG00000078330 | 2.00 | 2.24 | 1.67 |
| OTTHUMG00000154820 | 2.00 | 2.49 | 1.66 |
| LINC00492          | 2.00 | 2.38 | 1.62 |
| MIR624             | 2.00 | 2.44 | 1.64 |
| OTTHUMG00000167182 | 2.00 | 2.94 | 1.54 |
| OR4A47             | 2.00 | 2.26 | 1.61 |
| OTTHUMG00000017899 | 2.00 | 2.55 | 1.63 |
| RNA5SP77           | 2.00 | 2.88 | 1.58 |
| OTTHUMG00000161717 | 2.00 | 2.23 | 1.81 |
| LOC643802          | 1.99 | 2.97 | 1.47 |
| LOC100505817       | 1.99 | 2.59 | 1.63 |

|                    |      |      |      |
|--------------------|------|------|------|
| OTTHUMG00000160705 | 1.99 | 2.39 | 1.73 |
| MIR548J            | 1.99 | 2.56 | 1.59 |
| RNA5SP470          | 1.99 | 2.58 | 1.58 |
| IFNA4              | 1.99 | 2.48 | 1.72 |
| RSF1-IT1           | 1.99 | 2.19 | 1.78 |
| OTTHUMG00000159213 | 1.99 | 2.40 | 1.59 |
| HIST1H4G           | 1.99 | 2.52 | 1.60 |
| MIR3152            | 1.99 | 2.62 | 1.74 |
| MACC1-AS1          | 1.99 | 2.23 | 1.62 |
| PCNAP1             | 1.98 | 2.31 | 1.55 |
| CETN4P             | 1.98 | 2.28 | 1.61 |
| RAB9BP1            | 1.98 | 2.36 | 1.54 |
| OTTHUMG00000018126 | 1.98 | 2.31 | 1.58 |
| RNA5SP112          | 1.98 | 2.25 | 1.73 |
| OTTHUMG00000157235 | 1.98 | 2.46 | 1.69 |
| MIR516A2           | 1.98 | 2.72 | 1.47 |
| OR5AC2             | 1.98 | 2.69 | 1.54 |
| TRAJ40             | 1.98 | 2.82 | 1.54 |
| OTTHUMG00000156951 | 1.98 | 2.53 | 1.58 |
| HTN1               | 1.98 | 2.88 | 1.61 |
| UGT2B28            | 1.98 | 3.40 | 1.47 |
| TMEM212-IT1        | 1.97 | 2.38 | 1.77 |
| RNA5SP42           | 1.97 | 2.47 | 1.56 |
| OTTHUMG00000150320 | 1.97 | 2.41 | 1.66 |
| OTTHUMG00000162361 | 1.97 | 2.54 | 1.70 |
| IGHV2-26           | 1.97 | 2.99 | 1.51 |
| CEACAM7            | 1.97 | 2.30 | 1.64 |
| MIR934             | 1.97 | 2.19 | 1.70 |
| RNA5SP301          | 1.97 | 2.51 | 1.55 |
| MIR3202-2          | 1.97 | 2.37 | 1.71 |
| SCEL               | 1.97 | 2.42 | 1.55 |
| SNORD115-45        | 1.97 | 2.66 | 1.44 |
| PPIAL4C            | 1.97 | 2.67 | 1.45 |
| VENTXP1            | 1.97 | 2.52 | 1.55 |
| MIR301A            | 1.97 | 2.52 | 1.46 |
| PCDH9-AS3          | 1.97 | 2.64 | 1.66 |
| OTTHUMG00000164605 | 1.97 | 2.25 | 1.68 |
| MIR517A            | 1.97 | 2.63 | 1.63 |
| LOC729176          | 1.97 | 2.25 | 1.69 |
| MIR217             | 1.97 | 2.41 | 1.73 |
| OTTHUMG00000152871 | 1.96 | 2.49 | 1.70 |
| PSG11              | 1.96 | 2.20 | 1.57 |
| OTTHUMG00000039651 | 1.96 | 2.47 | 1.68 |
| LOC100128139       | 1.96 | 2.78 | 1.50 |
| OTTHUMG00000163234 | 1.96 | 2.40 | 1.58 |
| LINC00333          | 1.96 | 2.53 | 1.50 |
| SNORD114-5         | 1.96 | 2.95 | 1.11 |
| RNA5SP400          | 1.96 | 2.43 | 1.61 |
| OTTHUMG00000161742 | 1.96 | 2.74 | 1.56 |

|                     |      |      |      |
|---------------------|------|------|------|
| OTTHUMG00000017137  | 1.96 | 2.28 | 1.61 |
| OTTHUMG000000159007 | 1.96 | 2.22 | 1.71 |
| EIF1AX-AS1          | 1.96 | 2.21 | 1.77 |
| MIR4251             | 1.96 | 2.90 | 1.48 |
| OTTHUMG000000171031 | 1.96 | 2.44 | 1.60 |
| OTTHUMG000000155405 | 1.95 | 2.45 | 1.67 |
| LINC00583           | 1.95 | 2.19 | 1.70 |
| CCDC73              | 1.95 | 2.18 | 1.78 |
| OTTHUMG000000160741 | 1.95 | 2.21 | 1.72 |
| RPS4XP21            | 1.95 | 2.16 | 1.66 |
| MIR3919             | 1.95 | 2.57 | 1.64 |
| MIR3124             | 1.95 | 2.24 | 1.56 |
| OTTHUMG000000164447 | 1.95 | 2.52 | 1.57 |
| OTTHUMG000000033149 | 1.95 | 2.17 | 1.72 |
| SNORD115-24         | 1.95 | 3.26 | 1.47 |
| IFNW1               | 1.95 | 2.29 | 1.67 |
| OR5T3               | 1.95 | 2.23 | 1.60 |
| OTTHUMG00000018301  | 1.95 | 2.49 | 1.67 |
| OTTHUMG000000153762 | 1.95 | 2.38 | 1.58 |
| MIR4795             | 1.95 | 2.42 | 1.57 |
| MIR586              | 1.95 | 2.26 | 1.66 |
| OTTHUMG000000152624 | 1.94 | 2.14 | 1.70 |
| OR2T29              | 1.94 | 2.49 | 1.62 |
| C2orf27B            | 1.94 | 2.42 | 1.71 |
| MIR3908             | 1.94 | 2.93 | 1.29 |
| VCX                 | 1.94 | 2.28 | 1.67 |
| IL21                | 1.94 | 2.13 | 1.74 |
| MIR517C             | 1.94 | 2.51 | 1.51 |
| MIR3158-1           | 1.94 | 2.57 | 1.56 |
| SNORD93             | 1.94 | 2.31 | 1.62 |
| RNA5SP142           | 1.94 | 2.51 | 1.68 |
| CFHR2               | 1.94 | 2.73 | 1.45 |
| KRTAP9-6            | 1.94 | 2.48 | 1.59 |
| TAS2R8              | 1.94 | 2.34 | 1.69 |
| MIR106A             | 1.94 | 2.43 | 1.38 |
| RNA5SP404           | 1.94 | 2.35 | 1.53 |
| MIR411              | 1.93 | 2.49 | 1.31 |
| OR8J3               | 1.93 | 2.34 | 1.61 |
| OR5AN1              | 1.93 | 2.46 | 1.49 |
| OR5H15              | 1.93 | 2.51 | 1.49 |
| RNA5SP38            | 1.93 | 2.70 | 1.58 |
| CTSL1P8             | 1.93 | 2.59 | 1.38 |
| OTTHUMG000000171064 | 1.93 | 2.28 | 1.61 |
| OTTHUMG000000177363 | 1.93 | 2.41 | 1.54 |
| C1QTNF9-AS1         | 1.93 | 2.55 | 1.38 |
| HIST1H3B            | 1.93 | 3.10 | 1.34 |
| OTTHUMG00000011035  | 1.93 | 2.21 | 1.72 |
| SNORD18B            | 1.93 | 2.97 | 1.22 |
| PPP1R2P3            | 1.93 | 2.50 | 1.56 |

|                    |      |      |      |
|--------------------|------|------|------|
| RNA5SP389          | 1.93 | 2.71 | 1.47 |
| MIR876             | 1.93 | 2.25 | 1.68 |
| OTTHUMG00000161660 | 1.93 | 2.19 | 1.59 |
| RNA5SP454          | 1.93 | 2.83 | 1.62 |
| OTTHUMG00000166133 | 1.93 | 2.24 | 1.77 |
| SPINK14            | 1.93 | 2.45 | 1.62 |
| OTTHUMG00000021315 | 1.93 | 2.05 | 1.70 |
| OR5M3              | 1.92 | 2.51 | 1.53 |
| OTTHUMG00000165512 | 1.92 | 2.32 | 1.59 |
| ZNF385D-AS2        | 1.92 | 2.20 | 1.64 |
| MIR1207            | 1.92 | 2.54 | 1.76 |
| OTTHUMG00000046310 | 1.92 | 2.18 | 1.58 |
| MIR3684            | 1.92 | 2.33 | 1.64 |
| OTTHUMG00000003394 | 1.92 | 2.26 | 1.72 |
| DEFB112            | 1.92 | 2.42 | 1.60 |
| OTTHUMG00000164038 | 1.92 | 2.45 | 1.59 |
| OTTHUMG00000022736 | 1.92 | 2.31 | 1.68 |
| OR2J1              | 1.91 | 3.02 | 1.41 |
| MIR3910-1          | 1.91 | 2.55 | 1.58 |
| OTTHUMG00000168228 | 1.91 | 2.18 | 1.63 |
| MIR4286            | 1.91 | 2.43 | 1.47 |
| LINC00387          | 1.91 | 2.31 | 1.47 |
| UGT2B17            | 1.91 | 2.48 | 1.34 |
| MIR4768            | 1.91 | 2.36 | 1.65 |
| OTTHUMG00000160100 | 1.91 | 2.46 | 1.44 |
| OTTHUMG00000166110 | 1.91 | 2.27 | 1.59 |
| OTTHUMG00000153377 | 1.91 | 2.14 | 1.65 |
| OTTHUMG00000168930 | 1.91 | 2.17 | 1.67 |
| TAS2R38            | 1.91 | 2.40 | 1.59 |
| MIR4278            | 1.91 | 2.45 | 1.57 |
| OTTHUMG00000039564 | 1.91 | 2.34 | 1.59 |
| RNA5SP155          | 1.90 | 2.61 | 1.59 |
| IL2                | 1.90 | 2.18 | 1.47 |
| RNA5SP384          | 1.90 | 2.28 | 1.65 |
| MIR379             | 1.90 | 2.86 | 1.50 |
| OTTHUMG00000170385 | 1.90 | 2.18 | 1.69 |
| PCDHB8             | 1.90 | 2.48 | 1.64 |
| MIR519E            | 1.90 | 2.71 | 1.39 |
| OTTHUMG00000160709 | 1.90 | 2.49 | 1.47 |
| GPR174             | 1.90 | 2.63 | 1.63 |
| IGHV1-18           | 1.90 | 2.81 | 1.43 |
| OTTHUMG00000169533 | 1.89 | 2.30 | 1.47 |
| MIR3118-1          | 1.89 | 2.22 | 1.64 |
| MIR548S            | 1.89 | 2.93 | 1.33 |
| RNA5SP368          | 1.89 | 2.46 | 1.50 |
| HIST1H2AJ          | 1.89 | 2.61 | 1.51 |
| MIR625             | 1.89 | 2.87 | 1.35 |
| RNA5SP225          | 1.89 | 2.26 | 1.54 |
| MIR576             | 1.89 | 2.36 | 1.52 |

|                    |      |      |      |
|--------------------|------|------|------|
| OTTHUMG00000164905 | 1.89 | 2.15 | 1.43 |
| SUM01P1            | 1.89 | 2.36 | 1.39 |
| RNA5SP219          | 1.88 | 2.19 | 1.49 |
| SKA2P1             | 1.88 | 2.52 | 1.44 |
| MIR4308            | 1.88 | 2.33 | 1.58 |
| RAET1L             | 1.88 | 2.53 | 1.60 |
| SNORD116-25        | 1.88 | 2.65 | 1.49 |
| MIR4491            | 1.88 | 2.70 | 1.52 |
| OTTHUMG00000156184 | 1.88 | 2.42 | 1.60 |
| OTTHUMG00000134296 | 1.88 | 2.15 | 1.68 |
| ZNF99              | 1.88 | 2.80 | 1.37 |
| MIR3201            | 1.87 | 2.33 | 1.43 |
| HIST1H2AD          | 1.87 | 2.38 | 1.48 |
| MIR4762            | 1.87 | 2.12 | 1.63 |
| MIR3675            | 1.87 | 2.10 | 1.64 |
| IGKV1D-43          | 1.87 | 2.64 | 1.44 |
| OR2C1              | 1.87 | 2.33 | 1.34 |
| OTTHUMG00000015852 | 1.87 | 2.37 | 1.53 |
| OTTHUMG00000170042 | 1.87 | 2.20 | 1.62 |
| OTTHUMG00000015256 | 1.87 | 2.51 | 1.47 |
| OR2AE1             | 1.87 | 2.25 | 1.52 |
| OTTHUMG00000160622 | 1.87 | 2.52 | 1.52 |
| OTTHUMG00000166896 | 1.87 | 2.25 | 1.58 |
| OTTHUMG00000009840 | 1.87 | 2.39 | 1.56 |
| SSX1               | 1.86 | 2.08 | 1.36 |
| C1orf137           | 1.86 | 2.16 | 1.59 |
| OTTHUMG00000169688 | 1.86 | 2.17 | 1.57 |
| HELLPAR            | 1.86 | 2.74 | 1.41 |
| OR8K1              | 1.86 | 2.55 | 1.63 |
| MIR4499            | 1.86 | 2.31 | 1.54 |
| OTTHUMG00000164897 | 1.86 | 2.01 | 1.63 |
| HIST1H1T           | 1.86 | 2.30 | 1.63 |
| MIR4679-2          | 1.85 | 2.51 | 1.35 |
| MIR3144            | 1.85 | 2.59 | 1.35 |
| LINC00290          | 1.85 | 2.07 | 1.59 |
| RNA5SP227          | 1.85 | 2.86 | 1.55 |
| TRAV9-2            | 1.85 | 2.13 | 1.54 |
| MIR588             | 1.85 | 2.17 | 1.65 |
| FAM46D             | 1.85 | 2.05 | 1.54 |
| POTEA              | 1.85 | 2.12 | 1.58 |
| OTTHUMG00000019260 | 1.85 | 2.31 | 1.58 |
| RNA5SP198          | 1.85 | 2.48 | 1.60 |
| OR10A6             | 1.85 | 2.91 | 1.55 |
| OTTHUMG00000164267 | 1.85 | 2.17 | 1.62 |
| MIR523             | 1.85 | 2.20 | 1.38 |
| MIR3912            | 1.84 | 2.25 | 1.57 |
| OTTHUMG00000017940 | 1.84 | 2.26 | 1.40 |
| MIR4510            | 1.84 | 2.14 | 1.61 |
| UPP2-IT1           | 1.84 | 2.16 | 1.67 |

|                     |      |      |      |
|---------------------|------|------|------|
| MIR3145             | 1.84 | 2.35 | 1.22 |
| TMEM30C             | 1.84 | 2.02 | 1.63 |
| OTTHUMG00000019022  | 1.84 | 2.17 | 1.50 |
| OTTHUMG00000017053  | 1.84 | 2.34 | 1.52 |
| OR13C5              | 1.84 | 2.41 | 1.44 |
| MIR562              | 1.84 | 2.21 | 1.44 |
| OTTHUMG000000169689 | 1.84 | 2.75 | 1.27 |
| MIR522              | 1.84 | 2.18 | 1.45 |
| MIR4318             | 1.83 | 2.30 | 1.60 |
| CTD-2542C24.4       | 1.83 | 2.36 | 1.27 |
| SERPINB11           | 1.83 | 2.11 | 1.61 |
| OTTHUMG000000169099 | 1.83 | 2.06 | 1.55 |
| OTTHUMG000000144165 | 1.83 | 2.03 | 1.63 |
| RNA5SP89            | 1.83 | 2.46 | 1.38 |
| MIR451A             | 1.83 | 2.04 | 1.53 |
| OTTHUMG000000163604 | 1.83 | 2.33 | 1.48 |
| MIR4285             | 1.83 | 2.25 | 1.52 |
| OTTHUMG000000162184 | 1.82 | 2.31 | 1.37 |
| OTTHUMG00000017187  | 1.82 | 2.13 | 1.55 |
| OTTHUMG00000015981  | 1.82 | 2.39 | 1.52 |
| RNU6-54             | 1.82 | 2.11 | 1.35 |
| OR7A17              | 1.82 | 2.41 | 1.50 |
| RNA5SP98            | 1.82 | 2.65 | 1.54 |
| MIR190A             | 1.82 | 2.53 | 1.54 |
| SNORD60             | 1.82 | 2.27 | 1.37 |
| LSAMP-AS2           | 1.82 | 2.25 | 1.50 |
| SNORD115-3          | 1.82 | 2.58 | 1.44 |
| SPRR2E              | 1.82 | 1.97 | 1.51 |
| OTTHUMG000000162575 | 1.82 | 2.00 | 1.54 |
| RNVU1-13            | 1.82 | 2.34 | 1.41 |
| RNA5SP216           | 1.81 | 2.39 | 1.41 |
| OTTHUMG000000086915 | 1.81 | 2.22 | 1.44 |
| MIR891B             | 1.81 | 2.14 | 1.46 |
| RLN2                | 1.81 | 2.32 | 1.49 |
| OTTHUMG000000021486 | 1.81 | 2.06 | 1.62 |
| OTTHUMG000000163114 | 1.81 | 2.14 | 1.49 |
| AGR3                | 1.81 | 2.00 | 1.61 |
| MIR4759             | 1.81 | 2.94 | 1.25 |
| OR8H1               | 1.81 | 2.38 | 1.48 |
| C1orf143            | 1.81 | 2.10 | 1.44 |
| OTTHUMG000000166087 | 1.81 | 1.95 | 1.58 |
| OTTHUMG000000162993 | 1.81 | 2.19 | 1.58 |
| MIR4423             | 1.81 | 2.18 | 1.50 |
| TRDJ4               | 1.81 | 2.57 | 1.36 |
| MIR3938             | 1.81 | 2.32 | 1.43 |
| MIR3140             | 1.81 | 2.20 | 1.46 |
| MIR653              | 1.80 | 2.03 | 1.60 |
| OR6C6               | 1.80 | 2.26 | 1.26 |
| MIR618              | 1.80 | 1.97 | 1.57 |

|                    |      |      |      |
|--------------------|------|------|------|
| MIR526B            | 1.80 | 2.68 | 1.35 |
| PSG7               | 1.80 | 2.65 | 1.43 |
| OTTHUMG00000172358 | 1.80 | 2.13 | 1.60 |
| MIR30D             | 1.80 | 2.28 | 1.50 |
| MIR4693            | 1.79 | 2.58 | 1.44 |
| OTTHUMG00000158042 | 1.79 | 2.09 | 1.53 |
| OTTHUMG00000152955 | 1.79 | 2.25 | 1.50 |
| MIR548AM           | 1.79 | 2.54 | 1.27 |
| MIR4477A           | 1.79 | 2.39 | 1.29 |
| IGLV5-37           | 1.79 | 2.09 | 1.44 |
| SNORD11B           | 1.79 | 2.21 | 1.49 |
| SNORD116-16        | 1.78 | 2.33 | 1.43 |
| OTTHUMG00000154464 | 1.78 | 1.96 | 1.60 |
| FABP12             | 1.78 | 2.05 | 1.56 |
| PSG1               | 1.78 | 2.93 | 1.46 |
| RNA5SP54           | 1.78 | 2.21 | 1.57 |
| SNORD113-6         | 1.78 | 3.11 | 1.31 |
| MIR3914-1          | 1.78 | 2.26 | 1.39 |
| OR10A3             | 1.78 | 2.23 | 1.47 |
| OTTHUMG00000178158 | 1.78 | 2.15 | 1.34 |
| OTTHUMG00000162806 | 1.78 | 2.11 | 1.52 |
| LINC00314          | 1.78 | 2.06 | 1.48 |
| MIR3646            | 1.77 | 2.30 | 1.27 |
| C1QTNF9B           | 1.77 | 2.45 | 1.48 |
| OTTHUMG00000153849 | 1.77 | 2.08 | 1.63 |
| MIR367             | 1.77 | 2.22 | 1.46 |
| MIR378D1           | 1.77 | 2.29 | 1.35 |
| MIR4427            | 1.77 | 2.31 | 1.21 |
| MIR1283-1          | 1.77 | 2.46 | 1.46 |
| OR5H1              | 1.77 | 1.93 | 1.57 |
| TTY11              | 1.77 | 2.09 | 1.60 |
| OTTHUMG00000159502 | 1.77 | 2.16 | 1.50 |
| OTTHUMG00000074546 | 1.77 | 2.21 | 1.56 |
| FAM74A1            | 1.77 | 2.35 | 1.37 |
| SNORD115-33        | 1.76 | 2.24 | 1.53 |
| MIR302E            | 1.76 | 2.05 | 1.47 |
| OTTHUMG00000020126 | 1.76 | 2.11 | 1.38 |
| FAM223A            | 1.76 | 2.02 | 1.46 |
| OTTHUMG00000015760 | 1.76 | 2.18 | 1.53 |
| OTTHUMG00000162017 | 1.76 | 2.23 | 1.51 |
| IGKV1-5            | 1.76 | 2.05 | 1.50 |
| MIR3117            | 1.76 | 2.38 | 1.25 |
| RNA5SP468          | 1.76 | 2.35 | 1.34 |
| OTTHUMG00000164654 | 1.76 | 2.11 | 1.37 |
| OR11H4             | 1.76 | 2.10 | 1.56 |
| MIR4483            | 1.76 | 2.30 | 1.41 |
| OTTHUMG00000163145 | 1.75 | 2.04 | 1.53 |
| OTTHUMG00000015958 | 1.75 | 2.12 | 1.41 |
| KRTAP12-1          | 1.75 | 2.18 | 1.51 |



|                    |      |      |      |
|--------------------|------|------|------|
| TRAC               | 1.75 | 2.13 | 1.38 |
| TAS2R7             | 1.75 | 1.94 | 1.57 |
| SNORA76            | 1.75 | 2.17 | 1.22 |
| MIR4520A           | 1.74 | 2.00 | 1.61 |
| OTTHUMG00000160975 | 1.74 | 2.13 | 1.46 |
| OTTHUMG00000162781 | 1.74 | 1.90 | 1.51 |
| OR2T8              | 1.74 | 2.10 | 1.30 |
| IGKV6D-41          | 1.74 | 2.37 | 1.29 |
| MIR4320            | 1.74 | 2.04 | 1.41 |
| MIR3921            | 1.74 | 2.07 | 1.48 |
| OTTHUMG00000163741 | 1.74 | 1.96 | 1.60 |
| OTTHUMG00000016811 | 1.74 | 2.04 | 1.44 |
| IFNA21             | 1.74 | 2.81 | 1.43 |
| OTTHUMG00000078807 | 1.74 | 2.13 | 1.40 |
| MIR3672            | 1.74 | 1.92 | 1.46 |
| RNA5SP275          | 1.74 | 2.13 | 1.51 |
| CCDC168            | 1.74 | 2.15 | 1.41 |
| RNA5SP445          | 1.74 | 2.60 | 1.45 |
| MIR2053            | 1.74 | 2.11 | 1.31 |
| RNA5SP173          | 1.74 | 2.16 | 1.25 |
| MIR4439            | 1.73 | 2.44 | 1.41 |
| SLCO1B7            | 1.73 | 2.10 | 1.40 |
| MIR4791            | 1.73 | 2.26 | 1.43 |
| OR51B2             | 1.73 | 2.17 | 1.36 |
| MIR4802            | 1.73 | 2.06 | 1.37 |
| SNORD116-13        | 1.73 | 2.20 | 1.42 |
| SNORD115-27        | 1.73 | 1.99 | 1.23 |
| SNORD116-18        | 1.73 | 2.07 | 1.50 |
| RNU7-56P           | 1.73 | 2.00 | 1.36 |
| IGHD2-8            | 1.72 | 2.60 | 1.29 |
| RNA5SP397          | 1.72 | 2.16 | 1.41 |
| OR10A5             | 1.72 | 2.53 | 1.44 |
| UBD                | 1.72 | 2.26 | 1.31 |
| LOC729080          | 1.72 | 2.16 | 1.55 |
| RNU5F-8P           | 1.72 | 2.17 | 1.37 |
| OTTHUMG00000164603 | 1.71 | 2.03 | 1.48 |
| MIR376C            | 1.71 | 2.08 | 1.46 |
| RNU4-10P           | 1.71 | 2.24 | 1.31 |
| OR5K4              | 1.71 | 2.35 | 1.39 |
| RNA5SP271          | 1.71 | 2.12 | 1.34 |
| RNA5SP178          | 1.71 | 2.67 | 1.26 |
| MIR1305            | 1.71 | 2.05 | 1.40 |
| MIR633             | 1.71 | 1.95 | 1.45 |
| OTTHUMG00000162874 | 1.71 | 2.06 | 1.28 |
| OTTHUMG00000014284 | 1.71 | 2.06 | 1.52 |
| OTTHUMG00000152880 | 1.71 | 2.25 | 1.30 |
| OTTHUMG00000167602 | 1.70 | 2.13 | 1.46 |
| MIR507             | 1.70 | 2.07 | 1.35 |
| RFPL3              | 1.70 | 2.21 | 1.41 |

|                    |      |      |      |
|--------------------|------|------|------|
| RNA5SP169          | 1.70 | 2.19 | 1.23 |
| MIR135A2           | 1.70 | 2.18 | 1.29 |
| OTTHUMG00000163548 | 1.70 | 2.00 | 1.36 |
| RNU7-20P           | 1.70 | 2.40 | 1.29 |
| HIST3H2A           | 1.70 | 2.32 | 1.39 |
| MIR4738            | 1.70 | 2.39 | 1.38 |
| ZNF322P1           | 1.70 | 2.10 | 1.31 |
| OTTHUMG00000153807 | 1.70 | 1.96 | 1.43 |
| MIR1-2             | 1.69 | 1.98 | 1.44 |
| OR13C2             | 1.69 | 2.16 | 1.39 |
| MIR548W            | 1.69 | 2.23 | 1.22 |
| OR1Q1              | 1.69 | 1.98 | 1.45 |
| OR52I2             | 1.69 | 1.93 | 1.37 |
| RNU5A-1            | 1.69 | 2.13 | 1.50 |
| MIR3591            | 1.69 | 2.22 | 1.30 |
| SNORD115-38        | 1.69 | 2.04 | 1.37 |
| OTTHUMG00000158209 | 1.69 | 2.00 | 1.30 |
| MIR4720            | 1.69 | 2.11 | 1.41 |
| MIR561             | 1.69 | 2.13 | 1.40 |
| RNA5SP269          | 1.69 | 1.97 | 1.37 |
| OTTHUMG00000164593 | 1.69 | 2.13 | 1.36 |
| SNORD115-2         | 1.68 | 2.68 | 1.42 |
| MIR30B             | 1.68 | 2.25 | 1.43 |
| OTTHUMG00000164806 | 1.68 | 1.94 | 1.52 |
| MIR1252            | 1.68 | 2.03 | 1.50 |
| OTTHUMG00000132249 | 1.68 | 2.06 | 1.28 |
| MIR302F            | 1.68 | 2.27 | 1.38 |
| RNA5SP281          | 1.68 | 2.03 | 1.38 |
| MIR4475            | 1.68 | 2.20 | 1.27 |
| MIR518E            | 1.68 | 2.29 | 1.30 |
| MIR892B            | 1.68 | 2.15 | 1.33 |
| TSPAN19            | 1.67 | 2.03 | 1.37 |
| OTTHUMG00000151293 | 1.67 | 2.22 | 1.42 |
| FMR1-IT1           | 1.67 | 1.98 | 1.28 |
| MIR3688-1          | 1.67 | 2.18 | 1.24 |
| OTTHUMG00000035609 | 1.67 | 1.97 | 1.30 |
| OTTHUMG00000162941 | 1.67 | 2.06 | 1.35 |
| MIR1322            | 1.66 | 2.03 | 1.42 |
| MIR203             | 1.66 | 1.84 | 1.47 |
| FRMPD4-AS1         | 1.66 | 1.85 | 1.39 |
| MIR4471            | 1.66 | 2.23 | 1.19 |
| OR9K2              | 1.66 | 2.08 | 1.46 |
| MIR4705            | 1.66 | 1.96 | 1.34 |
| MIR378A            | 1.66 | 2.12 | 1.22 |
| OTTHUMG00000036749 | 1.65 | 2.00 | 1.43 |
| MIR3920            | 1.65 | 1.97 | 1.46 |
| OR5K3              | 1.65 | 2.02 | 1.45 |
| MIR3146            | 1.65 | 2.12 | 1.35 |
| MIR759             | 1.65 | 2.17 | 1.30 |

|                    |      |      |      |
|--------------------|------|------|------|
| OTTHUMG00000020999 | 1.65 | 2.48 | 1.34 |
| OR2M2              | 1.65 | 2.12 | 1.21 |
| OTTHUMG00000164188 | 1.64 | 1.90 | 1.36 |
| RNA5SP94           | 1.64 | 2.02 | 1.37 |
| OTTHUMG00000165818 | 1.64 | 2.26 | 1.28 |
| IFNA10             | 1.64 | 2.78 | 1.22 |
| RAB40AL            | 1.64 | 1.98 | 1.37 |
| OR12D3             | 1.64 | 2.43 | 1.29 |
| MIR4490            | 1.64 | 2.19 | 1.36 |
| HIST1H3C           | 1.64 | 1.97 | 1.35 |
| MIR29B1            | 1.63 | 2.20 | 1.25 |
| LINC00352          | 1.63 | 2.23 | 1.15 |
| SNORD115-15        | 1.63 | 2.01 | 1.35 |
| MIR384             | 1.63 | 1.99 | 1.30 |
| MIR4676            | 1.63 | 1.96 | 1.27 |
| MIR559             | 1.63 | 2.28 | 1.26 |
| SNORD119           | 1.62 | 1.87 | 1.41 |
| MIR4464            | 1.62 | 1.87 | 1.37 |
| VTRNA3-1P          | 1.62 | 1.83 | 1.42 |
| MIR4671            | 1.62 | 1.96 | 1.34 |
| MIR208B            | 1.62 | 1.84 | 1.43 |
| MIRLET7F2          | 1.61 | 1.84 | 1.35 |
| MIR556             | 1.61 | 2.25 | 1.41 |
| SNORD115-30        | 1.61 | 2.11 | 1.22 |
| OTTHUMG00000017840 | 1.61 | 2.02 | 1.28 |
| MIR450B            | 1.61 | 2.12 | 1.42 |
| MIR519B            | 1.60 | 2.23 | 1.36 |
| RNU5E-5P           | 1.60 | 2.39 | 1.17 |
| OTTHUMG00000170546 | 1.60 | 2.16 | 1.32 |
| MIR3119-1          | 1.60 | 1.97 | 1.20 |
| MIR4272            | 1.60 | 2.25 | 1.33 |
| RNA5SP109          | 1.59 | 1.83 | 1.33 |
| SNORD115-8         | 1.59 | 1.91 | 1.31 |
| MIR92A2            | 1.59 | 1.99 | 1.26 |
| SPANXN1            | 1.59 | 1.98 | 1.27 |
| TRAJ2              | 1.59 | 2.13 | 1.16 |
| RNA5SP48           | 1.58 | 1.85 | 1.32 |
| LOC100287612       | 1.58 | 2.09 | 1.27 |
| MIR4445            | 1.58 | 2.20 | 1.21 |
| UGT2B15            | 1.58 | 2.60 | 1.24 |
| MIR3173            | 1.58 | 2.04 | 1.31 |
| SSX3               | 1.58 | 1.95 | 1.26 |
| MIR450A2           | 1.57 | 2.08 | 1.24 |
| MIR1279            | 1.57 | 2.22 | 1.38 |
| MIR4662A           | 1.57 | 2.21 | 1.26 |
| OTTHUMG00000182183 | 1.57 | 1.93 | 1.30 |
| SNORD115-14        | 1.57 | 2.15 | 1.30 |
| MIR4777            | 1.57 | 1.91 | 1.24 |
| RNA5SP63           | 1.57 | 2.02 | 1.39 |

|                    |      |      |      |
|--------------------|------|------|------|
| OR5K1              | 1.57 | 2.32 | 1.21 |
| MIR4712            | 1.57 | 1.93 | 1.29 |
| OTTHUMG00000162791 | 1.57 | 1.81 | 1.25 |
| OTTHUMG00000162833 | 1.56 | 1.91 | 1.37 |
| SLC9B1P1           | 1.56 | 2.16 | 1.28 |
| SNORD115-10        | 1.56 | 1.94 | 1.09 |
| MIR4790            | 1.56 | 2.16 | 1.36 |
| SNORD115-28        | 1.56 | 1.79 | 1.29 |
| MIR569             | 1.56 | 1.99 | 1.36 |
| SNORD115-40        | 1.56 | 1.99 | 1.28 |
| MIR4735            | 1.55 | 1.82 | 1.36 |
| MIR3910-2          | 1.55 | 1.79 | 1.35 |
| MIR4465            | 1.55 | 1.77 | 1.39 |
| RNA5SP502          | 1.55 | 1.90 | 1.14 |
| MIR518F            | 1.55 | 1.85 | 1.19 |
| OR2T33             | 1.55 | 1.84 | 1.35 |
| RNY3P5             | 1.54 | 1.77 | 1.27 |
| TUBB8P7            | 1.54 | 1.86 | 1.24 |
| SNORD115-48        | 1.54 | 1.97 | 1.27 |
| RNA5SP371          | 1.54 | 1.86 | 1.10 |
| MIR651             | 1.53 | 1.72 | 1.34 |
| GYG2-AS1           | 1.53 | 1.86 | 1.23 |
| FAM74A6            | 1.53 | 2.04 | 1.16 |
| RNA5SP192          | 1.53 | 1.85 | 1.25 |
| KRTAP9-9           | 1.52 | 1.99 | 1.28 |
| MIR4536-1          | 1.52 | 2.08 | 1.30 |
| MIR3202-1          | 1.52 | 1.81 | 1.30 |
| MIR3167            | 1.52 | 2.12 | 1.25 |
| SNORD115-47        | 1.51 | 1.92 | 1.28 |
| MIR1297            | 1.51 | 1.87 | 1.34 |
| OTTHUMG00000169038 | 1.51 | 1.81 | 1.31 |
| TGIF2LX            | 1.51 | 1.80 | 1.10 |
| RNU5A-3P           | 1.51 | 2.31 | 1.10 |
| SNORD115-35        | 1.51 | 1.82 | 1.24 |
| SNORD115-21        | 1.50 | 2.08 | 1.19 |
| MIR3545            | 1.50 | 1.76 | 1.36 |
| MIR450A1           | 1.50 | 1.98 | 1.17 |
| MIR519C            | 1.50 | 1.86 | 1.19 |
| RNA5SP23           | 1.50 | 1.87 | 1.26 |
| MIR4521            | 1.50 | 2.18 | 1.05 |
| MIR124-3           | 1.49 | 1.85 | 1.31 |
| MIR3156-1          | 1.49 | 1.73 | 1.22 |
| TRGC2              | 1.48 | 2.24 | 1.24 |
| SNORD115-37        | 1.46 | 1.68 | 1.24 |
| MIR526A1           | 1.46 | 1.81 | 1.15 |
| MIR3923            | 1.46 | 1.74 | 1.19 |
| MIR4766            | 1.45 | 1.79 | 1.17 |
| MIR369             | 1.44 | 1.72 | 1.25 |
| SNORD115-4         | 1.43 | 1.72 | 1.09 |

|                    |      |      |      |
|--------------------|------|------|------|
| <i>NCOR1P1</i>     | 1.43 | 1.65 | 1.21 |
| <i>MIR3668</i>     | 1.43 | 1.79 | 1.14 |
| <i>RNU5A-2P</i>    | 1.41 | 1.69 | 1.18 |
| <i>RNA5SP147</i>   | 1.40 | 1.67 | 1.13 |
| <i>MIR376A1</i>    | 1.39 | 1.75 | 1.08 |
| <i>SNORD115-34</i> | 1.38 | 1.85 | 1.11 |
| <i>RNA5SP329</i>   | 1.38 | 1.70 | 1.14 |
